# Supplementary material for: p53-induced RNA-binding protein ZMAT3 inhibits transcription of a hexokinase to suppress mitochondrial respiration in human cancer cells
Source: eLife. 2026 Mar 17;14:RP107538. doi: 10.7554/eLife.107538 (PMC12995290; doi:10.7554/eLife.107538)
Supplement: Supplementary file 1. [file elife-107538-supp1.xlsx]

## Sheet: RNAseq WT vs ZMAT3-KO
Supplementary File 1. RNA-seq was performed from three biological replicates of ZMAT3-WT and isogenic ZMAT3-KO HCT116 cells . Differentially expressed genes were identified by using p value <0.05 as cut-off. FC refers to fold change.
Gene	FC (KO/WT)	log FC (KO/WT)	p-value	adj. p-value	ZMAT3_WT_1	ZMAT3_WT_2	ZMAT3_WT_3	ZMAT3_KO_1	ZMAT3_KO_2	ZMAT3_KO_3
OR51B5	0.00101719	-9.9412	4.48e-13	7.88e-11	4.37097	4.3747	4.48959	-6.62094	-4.98382	-4.98382
HBE1	0.00105468	-9.88898	2.94e-12	3.42e-10	4.31978	4.22865	4.25713	-6.08944	-4.15234	-6.62094
EHF	0.00200681	-8.96088	4.84e-14	1.47e-11	5.46683	5.51169	5.46714	-2.92592	-3.60919	-3.90134
AC104389.4	0.00425501	-7.87662	1.42e-13	3.14e-11	1.68462	1.5575	1.59037	-6.08944	-6.62094	-6.08944
SLC40A1	0.00527387	-7.56692	4.37e-11	2.92e-09	1.42278	1.49931	1.74602	-4.79032	-6.62094	-6.62094
OR51B4	0.00560981	-7.47783	2.57e-10	1.18e-08	1.63382	1.94073	1.98745	-6.62094	-4.15234	-6.09262
ZNF432	0.006948	-7.16919	1.65e-11	1.35e-09	0.270364	0.398406	0.975849	-6.62094	-6.62094	-6.62094
HBG2	0.00895859	-6.80251	1.52e-12	2.02e-10	0.0107732	0.344483	0.183895	-6.62094	-6.62094	-6.62094
ADGRF1	0.0131736	-6.2462	4.23e-13	7.6e-11	5.20153	5.33203	5.23119	-0.801141	-0.593678	-1.58837
ANO4	0.0150012	-6.05878	3.94e-10	1.62e-08	0.70968	1.00765	1.11918	-6.08944	-4.98382	-4.262
SKAP1	0.0224922	-5.47443	1.85e-10	9.14e-09	1.87981	2.11661	1.94489	-2.67408	-3.90134	-3.90134
ZNF804A	0.0226565	-5.46393	1.02e-09	3.43e-08	2.64177	2.74754	2.72151	-1.61493	-2.72859	-3.90134
AKT3	0.0305854	-5.03102	1.25e-10	6.85e-09	2.64928	2.84191	2.80399	-1.73542	-2.00077	-3.05136
TCL6	0.0415323	-4.58962	1.87e-10	9.15e-09	1.79654	2.01165	1.94073	-3.15911	-2.16226	-2.72859
CYP24A1	0.041976	-4.57429	6.15e-18	1.6e-14	7.38069	7.46209	7.4858	2.79826	2.90108	2.90108
FGF9	0.0535024	-4.22425	5.48e-08	8.81e-07	0.172251	0.303749	0.614081	-3.60919	-2.98864	-4.98382
LNCAROD	0.0566815	-4.14098	1.43e-11	1.19e-09	2.45694	2.43199	2.4413	-1.73542	-1.37189	-2.00077
AL133467.2	0.0581716	-4.10354	1.19e-10	6.62e-09	1.77681	1.58943	1.77106	-2.67408	-2.16226	-2.35906
KRT23	0.0616878	-4.01887	8.89e-12	8.52e-10	4.11871	4.05634	3.96836	0.25235	-0.491674	0.360466
KRTAP2-3	0.0638919	-3.96822	5.98e-11	3.75e-09	2.01139	1.87764	1.90872	-2.35906	-1.88363	-1.88363
COL12A1	0.0643271	-3.95843	3.09e-17	3.53e-14	7.0209	7.05194	7.12437	3.08464	3.20958	3.02049
CCN2	0.0731124	-3.77374	5.72e-11	3.64e-09	4.37191	4.46913	4.13555	0.556036	0.198956	0.92163
AL133467.4	0.0757877	-3.72189	1.32e-08	2.77e-07	0.0918174	0.330615	0.512654	-3.97201	-2.98864	-3.26686
HOXB8	0.0758176	-3.72132	6.34e-14	1.8e-11	4.24967	4.1724	4.1724	0.463302	0.551958	0.409593
AFAP1L2	0.0782461	-3.67584	5.71e-08	9.08e-07	0.442477	0.803018	0.368604	-3.97201	-2.54104	-2.92592
KLK5	0.0799464	-3.64482	7.78e-07	7.37e-06	0.570865	1.09701	0.657432	-4.262	-2.24045	-2.16226
RIC8A	0.0805514	-3.63395	2.38e-16	1.82e-13	5.83091	5.81026	5.77836	2.15424	2.24665	2.1109
HOXB4	0.0827051	-3.59588	7.71e-12	7.55e-10	3.7098	3.6308	3.67289	-0.395113	0.358967	0.227385
CU634019.1	0.0980745	-3.34998	0.0271956	0.0465307	2.05856	2.15501	-0.434475	0.0107732	-6.62094	0.602994
DKK1	0.110504	-3.17783	1.14e-19	1.48e-15	9.56186	9.63309	9.57178	6.41957	6.42761	6.38611
ARHGAP29	0.11413	-3.13124	6.31e-19	4.05e-15	9.23132	9.33465	9.30782	6.14995	6.18997	6.13957
CU633904.1	0.118624	-3.07553	0.0929878	0.13596	2.1857	2.5099	-1.85693	1.35275	-6.62094	-0.803268
SUN3	0.118833	-3.07299	5.96e-11	3.75e-09	2.21367	2.1241	2.29411	-0.851038	-0.968371	-0.764874
B3GALT5	0.119999	-3.05891	3.41e-08	6.08e-07	0.813426	0.939534	1.23102	-2.00077	-1.58837	-2.61956
LINC00326	0.121204	-3.04449	2.72e-08	5.02e-07	0.513219	0.825959	1.08399	-2.00077	-2.33475	-2.35906
HOXA-AS2	0.126546	-2.98226	7.57e-08	1.14e-06	0.119264	0.564759	0.334434	-3.15911	-2.54104	-2.24045
KRT15	0.132364	-2.91742	3.24e-10	1.42e-08	2.83787	2.68273	2.80825	-0.0379647	0.198956	-0.600357
ZMAT3	0.13478	-2.89133	6.61e-13	1.02e-10	5.00382	5.20317	5.25795	2.24752	2.34433	2.19509
SVIL	0.137122	-2.86647	2.62e-14	1.04e-11	4.67753	4.6131	4.68456	1.7966	1.85723	1.71707
STAC3	0.138073	-2.8565	1.29e-10	6.91e-09	2.1304	1.99296	2.15822	-0.643082	-0.873713	-0.764874
AC105052.3	0.14174	-2.81868	0.0206066	0.0365886	0.841293	0.650311	-0.773185	-1.51996	0.32693	-6.62094
KRT13	0.149683	-2.74002	1.19e-07	1.64e-06	0.36954	0.377129	-0.15152	-2.54104	-2.54104	-2.54104
NECTIN3	0.151102	-2.7264	3.52e-17	3.53e-14	7.40658	7.4774	7.4774	4.66234	4.79945	4.71548
ALDH1A3	0.157181	-2.6695	1.9e-18	6.19e-15	8.89263	8.93713	8.95853	6.27059	6.29681	6.21187
ZBTB18	0.16959	-2.55988	2.3e-11	1.76e-09	2.68543	2.79414	2.74059	0.0911345	0.270364	0.173055
ICA1	0.173981	-2.523	1.06e-11	9.61e-10	3.03152	2.9641	3.05874	0.388195	0.570865	0.516191
PLA2G7	0.174067	-2.52229	1.8e-07	2.28e-06	1.32157	1.58274	1.30148	-0.707806	-0.764874	-1.88363
PRKG1-AS1	0.192924	-2.3739	1.34e-07	1.82e-06	0.387269	0.564759	0.489696	-2.35906	-1.88363	-1.45012
TRIP11	0.212072	-2.23737	7.81e-14	2.08e-11	5.0549	5.12266	5.19676	2.81921	2.9569	2.87879
PLK2	0.217744	-2.19929	4.41e-16	2.87e-13	7.26181	7.20858	7.1702	5.0656	5.03889	4.93866
CST6	0.217939	-2.198	4.22e-11	2.85e-09	4.35862	4.11608	4.09777	2.01226	1.86614	2.10574
AL136295.1	5.7341	2.51957	0.0486471	0.07707	0.433861	-6.62094	0.26607	1.25906	0.628542	-0.327674
CDK6	0.220382	-2.18192	3.02e-14	1.11e-11	6.48165	6.58445	6.67778	4.39505	4.47354	4.32649
GLI2	0.220795	-2.17922	6.45e-10	2.41e-08	2.65446	2.44106	2.5501	0.513784	0.44743	0.144235
INPP4B	0.234837	-2.09027	1.74e-13	3.66e-11	4.71394	4.79276	4.85248	2.68729	2.72145	2.67836
NR5A2	0.243613	-2.03734	1.61e-09	4.87e-08	2.70794	2.908	2.88018	0.98447	0.489696	0.938865
NR4A1	0.255778	-1.96703	1.9e-10	9.29e-09	6.82469	6.44588	6.38027	4.61367	4.46523	4.67456
DACT1	0.25641	-1.96348	2.57e-07	3.03e-06	0.668218	0.86389	1.136	-1.30379	-0.968371	-0.96083
SCN3A	0.260566	-1.94028	1.26e-07	1.72e-06	0.995103	1.08851	1.22651	-1.23285	-0.602868	-0.699144
BCAR3	0.26415	-1.92057	5.9e-13	9.49e-11	4.31001	4.21849	4.27827	2.32603	2.3579	2.3579
INHBB	0.266339	-1.90867	2.04e-06	1.6e-05	0.0525123	-0.162064	0.227385	-2.00077	-1.47029	-2.16226
EGR2	0.266975	-1.90522	8.78e-08	1.28e-06	2.59766	2.24627	2.05104	0.534736	0.313051	0.335707
CYP26A1	0.268466	-1.89719	7.04e-07	6.78e-06	0.321979	0.26607	0.614081	-1.73542	-1.18898	-1.58837
SNCA	0.273014	-1.87295	1.19e-08	2.55e-07	2.43199	2.49561	2.3768	0.275427	0.951099	0.427822
TINAGL1	0.275068	-1.86214	4.01e-15	1.93e-12	5.92382	5.88101	5.89979	4.0617	3.98652	4.07318
USP28	0.276897	-1.85258	1.85e-13	3.73e-11	4.57085	4.54317	4.53698	2.73585	2.71273	2.64532
CCN1	0.28251	-1.82363	5.02e-14	1.49e-11	6.87224	6.80655	6.6814	4.92909	4.98512	4.97292
GALNT5	0.282983	-1.82121	1.06e-09	3.53e-08	2.93939	3.19932	3.11325	1.08159	1.34193	1.35672
EMP1	0.283331	-1.81944	4.26e-13	7.6e-11	5.16565	5.2464	5.25637	3.4103	3.5137	3.28092
SYT1	0.284938	-1.81128	8.41e-14	2.14e-11	5.39202	5.48938	5.51227	3.59498	3.68558	3.67578
HOXB3	0.286061	-1.80561	3.97e-08	6.85e-07	1.64928	1.78266	1.93639	-0.00725352	0.217987	-0.268577
ZNF320	0.289994	-1.78591	0.00420888	0.00929921	1.95424	0.691444	-0.273688	-0.882825	-0.918777	-1.2008
BHMG1	0.290037	-1.78569	1.98e-07	2.45e-06	0.799665	0.782086	0.88777	-0.643082	-1.18898	-1.03431
CPA4	0.294322	-1.76453	3.09e-10	1.37e-08	3.36619	3.32958	3.55487	1.64801	1.75515	1.54595
KRT19	0.29673	-1.75278	3.48e-16	2.39e-13	9.64227	9.54357	9.56186	7.84943	7.78869	7.85179
SLC2A1	0.298112	-1.74607	5.22e-16	3.24e-13	7.84943	7.8121	7.85289	6.11018	6.03324	6.13438
SPTSSB	0.299228	-1.74068	1.22e-06	1.07e-05	0.761091	0.782086	0.368604	-0.958722	-1.37189	-0.96083
GRIN2B	0.301545	-1.72955	6.5e-11	3.98e-09	3.56261	3.60843	3.73323	1.83688	2.01152	1.85723
CCDC122	0.302518	-1.7249	1.34e-07	1.82e-06	1.03934	1.11835	1.2785	-0.755046	-0.654134	-0.331709
PLXNA2	0.303217	-1.72158	7.45e-07	7.11e-06	0.458233	0.564759	0.368604	-1.08144	-1.10158	-1.58837
FLCN	0.307692	-1.70044	1.86e-11	1.47e-09	3.59742	3.58032	3.63236	1.85717	1.84056	2.01226
AC097478.1	0.30915	-1.69362	1.17e-06	1.04e-05	1.56314	1.69303	1.2785	0.0911345	0.0215631	-0.654134
TAGLN	0.309515	-1.69192	5.79e-08	9.16e-07	1.9821	1.65588	1.90894	-0.0379647	0.313051	0.173055
AL513477.1	0.310613	-1.68681	6.04e-07	6.02e-06	0.345189	0.602994	0.34736	-1.40197	-1.18898	-1.17716
ANKRD20A4	0.311989	-1.68043	1.11e-06	9.88e-06	0.314898	0.387196	0.210725	-1.32835	-1.66103	-1.12346
NR4A2	0.312679	-1.67725	3.78e-10	1.59e-08	4.37661	4.06525	4.13306	2.51113	2.57945	2.44352
PRXL2A	0.31417	-1.67038	6.95e-12	7.01e-10	3.6916	3.7271	3.72052	2.07679	2.00506	2.05103
ANO1	0.316965	-1.6576	7.69e-14	2.08e-11	6.22206	6.13276	6.22769	4.50328	4.62603	4.47438
TACSTD2	0.317145	-1.65679	1e-07	1.43e-06	2.20087	2.21201	2.16495	0.866029	0.665953	0.0830467
APOBEC3B	0.328695	-1.60518	5e-11	3.25e-09	3.73119	3.70123	3.73545	2.29279	2.02124	2.05311
HMSD	0.329487	-1.60171	5.66e-07	5.73e-06	0.680458	0.742907	0.541797	-0.98365	-1.12346	-0.724557
RGS2	0.33201	-1.5907	4.2e-14	1.33e-11	5.63163	5.66905	5.64274	4.12469	4.00727	4.04499
LACC1	0.334963	-1.57793	5.89e-09	1.43e-07	2.04447	2.09509	2.01027	0.570437	0.489696	0.360466
TRHDE	0.337562	-1.56677	2.56e-08	4.84e-07	1.71316	1.82864	1.79889	0.415575	0.125784	0.114049
SSTR5-AS1	0.338238	-1.56389	5.69e-07	5.74e-06	0.92502	0.825959	1.08399	-0.540872	-0.873713	-0.429848
RBM24	0.338985	-1.5607	1.84e-10	9.11e-09	3.40086	3.47879	3.34828	1.98705	1.77848	1.7935
KLK6	0.346219	-1.53024	1.11e-13	2.64e-11	5.25509	5.2665	5.3059	3.72748	3.716	3.7941
ITGB8	0.3508	-1.51128	3.58e-07	3.93e-06	1.72462	1.37751	1.73214	0.14282	0.227385	-0.082154
RNVU1-7	0.352479	-1.50439	0.360075	0.435843	2.01523	1.86279	-0.654134	-6.62094	1.97124	3.01895
BHLHE41	0.353264	-1.50118	2.03e-07	2.51e-06	1.00739	1.0502	1.06212	-0.643082	-0.354495	-0.397583
TNFRSF10C	0.355148	-1.49351	2.73e-07	3.18e-06	1.74144	1.59656	1.90613	0.491482	0.281771	-0.00520277
CALB2	0.355686	-1.49132	4.49e-07	4.75e-06	1.29082	1.43989	1.20978	0.033907	-0.459677	-0.082154
AC012363.1	0.35645	-1.48823	3.66e-05	0.00017	-0.0686728	0.660317	0.0959823	-1.08144	-1.18898	-1.49047
TLL1	0.357414	-1.48433	3.95e-05	0.000181	0.345189	0.660317	0.832762	-0.643082	-1.47029	-0.461295
PDCD6IPP2	0.358444	-1.48018	4.73e-05	0.000211	0.466639	0.668218	0.155411	-1.12346	-1.51996	-0.483735
HNF4A	0.359297	-1.47675	1.1e-09	3.6e-08	2.92448	2.93883	3.0802	1.46795	1.44606	1.60074
CUEDC1	0.360283	-1.4728	1.52e-13	3.24e-11	5.95097	5.82571	5.90235	4.41634	4.44495	4.39692
KRT20	0.361468	-1.46806	2.07e-07	2.55e-06	1.36814	1.15454	1.43098	-0.200996	-0.109631	-0.148655
MAT1A	0.362217	-1.46508	5.49e-06	3.56e-05	0.471215	0.419554	0.148213	-1.40197	-0.873713	-1.10147
ADAMTS16	0.365385	-1.45251	5.29e-06	3.45e-05	0.22331	0.0201501	0.123933	-1.08144	-1.58837	-1.30379
SLC16A6	0.370125	-1.43391	6.09e-11	3.78e-09	3.90948	3.89208	4.00275	2.46664	2.6074	2.4194
HES1	0.371482	-1.42864	3.59e-11	2.5e-09	3.87696	3.85561	3.78363	2.48436	2.39703	2.35346
SYTL3	0.373936	-1.41914	1.15e-14	5.16e-12	6.46533	6.43821	6.48632	5.07472	5.03741	5.02127
RPL36A-HNRNPH2	0.37551	-1.41308	0.00909864	0.0180161	1.5017	3.02624	1.61016	1.51297	0.798043	-0.347772
FAM27C	0.378199	-1.40278	4.25e-05	0.000193	0.074048	0.200633	-0.356384	-1.16525	-1.73542	-1.36346
GPR87	0.379205	-1.39895	1.55e-06	1.28e-05	1.44187	1.54097	1.82036	0.309165	-0.109631	0.427822
FOS	0.379232	-1.39885	1.73e-12	2.18e-10	7.7061	7.60359	7.63311	6.31785	6.10509	6.32754
FOSB	0.381265	-1.39113	5.66e-11	3.62e-09	6.19196	5.98843	5.93763	4.74987	4.55777	4.64299
ETV7	0.385013	-1.37702	3.34e-05	0.000158	0.22331	0.21914	0.550974	-1.56181	-0.764874	-0.84322
CRIM1	0.388917	-1.36247	5.57e-12	5.76e-10	5.05261	5.05813	5.09653	3.83222	3.69608	3.59762
CLSPN	0.389002	-1.36215	7.56e-13	1.11e-10	6.56379	6.57812	6.60094	5.11763	5.33742	5.19409
THBS1	0.389007	-1.36213	1.33e-11	1.11e-09	4.76882	4.88762	4.76992	3.44917	3.53122	3.35659
RERG	0.392106	-1.35069	4.49e-06	3.04e-05	0.614081	0.532639	0.424993	-0.593678	-1.10158	-0.764874
SUSD2	0.393474	-1.34566	1.22e-09	3.89e-08	2.84866	2.87985	2.90542	1.55706	1.44606	1.60074
ARSJ	0.395736	-1.33739	3.58e-07	3.92e-06	1.74674	1.64328	1.51209	0.0616386	0.425283	0.385294
STAMBPL1	0.396281	-1.3354	9.96e-10	3.36e-08	3.43539	3.49559	3.46487	1.93264	2.25384	2.18591
NEK5	0.396993	-1.33282	3.18e-05	0.000152	0.22331	0.330615	0.123933	-0.755046	-0.968371	-1.58837
C6orf99	0.397892	-1.32955	1.55e-06	1.29e-05	1.0963	1.37751	1.48291	-0.0379647	0.150157	-0.148655
PRF1	0.398638	-1.32685	2.64e-05	0.00013	0.22331	0.443452	0.730995	-0.540872	-0.873713	-1.15333
LOXL4	0.399515	-1.32368	2.66e-06	2e-05	0.532453	0.532639	0.757705	-0.707806	-0.602868	-0.84322
JAKMIP2	0.408433	-1.29183	1.71e-05	9.05e-05	0.458233	0.532639	0.0464563	-0.903682	-0.968371	-0.96083
F3	0.409339	-1.28863	5.14e-10	2.01e-08	4.12705	4.15619	4.32624	2.85851	3.03277	2.84191
PTGES3L	0.410929	-1.28304	5.95e-06	3.78e-05	0.137628	0.366336	0.363861	-1.01724	-1.04051	-0.918777
ADAMTS14	0.411227	-1.28199	8.46e-07	7.9e-06	1.20092	1.02804	1.15454	-0.00725352	-0.297187	-0.148655
TRIM15	0.411351	-1.28156	1.31e-06	1.13e-05	2.00562	1.57288	1.72496	0.463302	0.358967	0.63355
AP002478.1	0.416234	-1.26453	4.39e-06	2.99e-05	1.44187	1.08058	1.02051	0.0616386	-0.0771319	-0.235693
ATP8A1	0.417326	-1.26075	3.31e-05	0.000157	0.241622	0.443452	0.695108	-1.16525	-0.602868	-0.654134
KRT80	0.420338	-1.25038	2.44e-10	1.14e-08	3.70066	3.63499	3.68784	2.48436	2.47355	2.31314
NUAK2	0.422389	-1.24335	3.05e-09	8.38e-08	2.94331	2.90376	2.84259	1.69903	1.56229	1.70564
MALT1	0.423689	-1.23892	3.08e-14	1.11e-11	7.18424	7.18891	7.23756	5.95587	6.00586	5.93093
ANKRD20A1	0.424342	-1.2367	5.16e-05	0.000226	0.252066	0.285411	0.481359	-0.616837	-0.693185	-1.38031
BRWD3	0.42467	-1.23559	2.55e-11	1.91e-09	4.23638	4.34696	4.26853	3.03353	3.06489	3.04671
NEK10	0.424724	-1.2354	3.58e-05	0.000167	0.119264	-0.200996	0.227385	-1.08144	-1.37189	-1.10147
GFY	0.425778	-1.23183	5.56e-05	0.00024	0.321979	0.26607	0.462603	-0.643082	-1.37189	-0.600357
VSIR	0.42733	-1.22658	2.07e-09	5.97e-08	4.19724	4.13836	4.24088	3.0957	2.74031	3.0801
AC089983.1	0.427924	-1.22457	4.52e-05	0.000204	-0.193941	0.114049	0.25473	-1.40197	-1.07103	-1.03431
PDLIM5	0.430368	-1.21636	3.61e-13	6.72e-11	7.04411	7.15792	7.16762	5.8702	5.93698	5.91233
MEGF11	0.431564	-1.21235	7.44e-06	4.56e-05	0.691444	0.564759	0.442477	-0.851038	-0.541577	-0.559924
ATF3	0.433322	-1.20649	5.79e-11	3.66e-09	5.09462	5.00518	4.89622	3.85112	3.76332	3.76544
HOXA3	0.437962	-1.19112	1.19e-08	2.55e-07	2.84191	2.84191	2.94759	1.53634	1.81305	1.693
FXYD1	0.438297	-1.19002	0.000131	0.000487	0.0918174	0.252066	-0.0530093	-1.40197	-0.602868	-1.30379
TBC1D22B	0.439526	-1.18598	9.06e-11	5.25e-09	4.30765	4.27783	4.25133	3.18644	3.11815	2.97708
AL161431.1	0.439945	-1.1846	1.7e-07	2.19e-06	2.84412	3.00263	3.1747	2.02963	1.65867	1.8024
CKMT1B	0.440416	-1.18306	1.07e-11	9.68e-10	5.33239	5.17205	5.24514	4.07896	4.06309	4.05717
BHLHE40	0.442426	-1.17649	8.19e-12	7.96e-10	5.89929	5.75655	5.76494	4.68289	4.63585	4.57306
COL9A3	0.44482	-1.16871	1.4e-09	4.39e-08	3.66526	3.58777	3.47396	2.44106	2.37442	2.40831
ADM	0.44498	-1.16819	4.84e-12	5.05e-10	5.25319	5.14722	5.15428	4.02049	4.0352	3.99249
RPGRIP1L	0.447322	-1.16061	2.46e-10	1.15e-08	4.24792	4.33805	4.3043	3.15724	3.24328	3.00393
DHRS3	0.450439	-1.1506	6.89e-12	7.01e-10	6.06649	6.00003	5.96323	4.94346	4.7672	4.87323
PRKCQ-AS1	0.451479	-1.14727	3.4e-08	6.08e-07	2.48966	2.46594	2.64075	1.4489	1.34193	1.36814
CA2	0.451696	-1.14658	2.18e-13	4.25e-11	6.42797	6.42021	6.3885	5.29882	5.21373	5.28721
SLC35F3	0.451819	-1.14618	1.16e-08	2.5e-07	2.99469	3.08073	2.86975	1.8111	1.86614	1.82862
KCNRG	0.452832	-1.14295	0.000159	0.000573	0.155411	0.17278	-0.327674	-0.973806	-1.0281	-1.42363
SULF2	0.457503	-1.12815	1.34e-10	7.06e-09	3.95426	4.0352	4.03207	2.86409	2.93215	2.83793
PDCD6IP	0.457961	-1.1267	3.43e-14	1.21e-11	7.50228	7.48656	7.54428	6.36252	6.39952	6.39007
PEG10	0.458743	-1.12424	4.46e-11	2.96e-09	4.91662	4.89898	5.02549	3.90195	3.76332	3.80912
TMEM145	0.458941	-1.12362	3.56e-05	0.000167	0.832508	0.834413	0.569207	-0.00725352	-0.638472	-0.461295
EPS8	0.461794	-1.11468	2.58e-12	3.11e-10	6.43634	6.55257	6.55285	5.36993	5.37147	5.45725
SIK1	0.462162	-1.11353	1.34e-09	4.22e-08	4.41145	4.19296	4.27242	3.26899	3.17196	3.09685
FHAD1	0.464441	-1.10643	9.87e-06	5.74e-05	0.911205	0.994469	1.09783	0.0616386	0.0215631	-0.397583
KLK10	0.466114	-1.10124	2.81e-08	5.13e-07	3.08842	3.15523	2.99454	2.05692	1.80693	2.08748
GEMIN5	0.468599	-1.09357	1.74e-12	2.18e-10	7.48317	7.41368	7.44438	6.32645	6.4467	6.28433
GPRC5A	0.468795	-1.09297	1.37e-13	3.07e-11	8.01133	8.1187	8.09548	6.97705	6.98998	6.97981
KLRC2	0.470517	-1.08768	6.85e-05	0.000286	0.2043	0.469232	0.296256	-0.459677	-0.753529	-1.06458
MAOB	0.470732	-1.08702	2.79e-12	3.28e-10	5.25484	5.2755	5.22514	4.16981	4.1951	4.12855
DLGAP1	0.471599	-1.08437	6.86e-06	4.26e-05	0.761091	1.00765	1.03249	-0.0953921	-0.199252	-0.148655
SCNN1A	0.474396	-1.07583	6.75e-13	1.04e-10	6.28582	6.21206	6.21417	5.17725	5.13305	5.17523
OSR1	0.477671	-1.06591	1.17e-07	1.62e-06	2.20087	2.23683	2.33076	1.22303	1.25561	1.09014
NR1D1	0.478455	-1.06355	6.07e-12	6.23e-10	5.46396	5.36444	5.3961	4.3819	4.33245	4.32047
STX11	0.479142	-1.06147	3.58e-05	0.000167	-0.000416	0.21914	0.172569	-0.958722	-0.873713	-0.96083
AL138752.2	0.479341	-1.06088	0.409036	0.484044	-0.400052	-1.32835	-1.2008	0.196121	-6.62094	0.560434
MYO7A	0.480407	-1.05767	1.64e-05	8.78e-05	0.570865	0.730468	0.532707	-0.313944	-0.417749	-0.600357
PTGER2	0.481964	-1.053	0.000193	0.000673	0.0918174	0.0894458	0.334434	-0.755046	-0.593678	-1.30379
DUSP5	0.482907	-1.05018	4.52e-12	4.79e-10	6.85602	6.81321	6.70286	5.7652	5.74454	5.71216
PON3	0.483019	-1.04985	9.62e-06	5.62e-05	0.976584	1.09701	0.88777	0.14282	-0.109631	-0.208108
CRIP1	0.48641	-1.03975	7.45e-09	1.73e-07	4.78227	4.6426	4.53723	3.62135	3.47771	3.75005
AC015849.5	0.48653	-1.0394	1.44e-05	7.85e-05	1.17445	0.902021	1.3149	0.14282	0.0455571	0.0830467
HOXB6	0.486686	-1.03894	1.7e-08	3.42e-07	3.10151	3.29868	3.25073	2.21367	2.104	2.22682
AC019068.1	0.486904	-1.03829	3.65e-06	2.58e-05	1.35478	1.14157	1.29051	0.118424	0.313051	0.227385
C2orf72	0.487557	-1.03636	1.07e-06	9.6e-06	2.71933	2.52104	2.57808	1.68311	1.74661	1.27045
NTN4	0.487617	-1.03618	4.65e-07	4.87e-06	1.80836	1.72496	1.76351	0.783458	0.650175	0.759605
CLUH	0.489282	-1.03126	5.59e-13	9.22e-11	8.38206	8.27258	8.27258	7.2798	7.30311	7.24969
ZNF783	0.489352	-1.03106	1.49e-06	1.25e-05	1.94233	2.26263	2.13534	1.07579	1.21105	0.959339
SRGAP1	0.490684	-1.02713	1.64e-10	8.26e-09	5.60005	5.70406	5.77507	4.69399	4.73583	4.56685
IFT43	0.491304	-1.02531	1.1e-09	3.6e-08	3.73083	3.69385	3.66968	2.67872	2.74754	2.58723
FOLR1	0.494314	-1.0165	1.5e-05	8.16e-05	1.51104	1.14157	1.17186	0.335707	0.125784	0.316908
MSX1	0.49484	-1.01497	2.6e-11	1.93e-09	6.48744	6.31649	6.33938	5.33621	5.3683	5.39174
DLK2	0.495844	-1.01204	0.000129	0.000481	0.570865	0.398406	0.846817	-0.707806	-0.354495	-0.176047
AC107918.4	0.496741	-1.00943	5.83e-05	0.000251	0.489696	0.704392	0.614081	-0.200996	-0.708913	-0.284167
MB21D2	0.496791	-1.00929	5.79e-08	9.16e-07	2.94901	3.02068	2.93294	2.15424	1.86614	1.87202
MDGA1	0.49783	-1.00628	0.000204	0.000704	-0.000416	0.232246	0.304973	-0.903682	-0.491674	-1.10147
IRS2	0.50067	-0.998068	9.23e-09	2.08e-07	3.52534	3.40648	3.35918	2.43849	2.49909	2.35346
AP000580.1	0.500836	-0.99759	0.00125628	0.00328214	0.10007	0.14634	0.291446	-1.49047	-0.699144	-0.295298
IGFBP6	0.501433	-0.995872	5.53e-11	3.55e-09	4.97405	4.88085	4.90935	3.92014	3.87065	3.9873
PRR14L	0.501672	-0.995184	1.28e-10	6.85e-09	6.16444	6.30607	6.26926	5.1922	5.36704	5.19013
SPEF1	0.502106	-0.993937	6.2e-05	0.000263	0.300469	0.26607	0.0464563	-0.707806	-0.813491	-0.84322
PLCB2	0.502269	-0.993467	9.54e-06	5.58e-05	0.976584	0.86389	1.0502	-0.0953921	0.0773554	-0.082154
KRT8P36	0.503247	-0.990662	5.29e-05	0.000231	0.696907	0.510855	0.706573	-0.219344	-0.206606	-0.637165
SCARA3	0.50468	-0.98656	9.52e-12	8.92e-10	5.45003	5.41497	5.47592	4.40275	4.50499	4.46883
CRTAP	0.505208	-0.98505	3.13e-13	5.91e-11	6.86138	6.84732	6.87658	5.91425	5.85081	5.86655
CNGA1	0.505873	-0.983154	6.96e-05	0.00029	0.22331	0.377129	0.614081	-0.593678	-0.541577	-0.600357
SGIP1	0.507222	-0.97931	0.000295	0.000965	0.345189	-0.111569	0.172569	-0.958722	-1.01724	-0.559924
SOX9	0.508363	-0.976068	3.23e-12	3.72e-10	6.28296	6.25918	6.26323	5.22132	5.34749	5.30414
SH3TC2	0.508463	-0.975785	2.43e-08	4.61e-07	2.94901	2.97484	3.02824	1.93264	1.96871	2.12233
HOXA4	0.508598	-0.975401	5.11e-06	3.37e-05	1.44187	1.65588	1.70013	0.463302	0.68615	0.715733
PATJ	0.508778	-0.974893	1.1e-10	6.22e-09	5.05261	5.07411	5.05452	3.97388	4.17441	4.09958
TFAP2A	0.509254	-0.973543	8.58e-10	2.98e-08	4.14496	4.14592	4.19333	3.09843	3.16109	3.30118
CES3	0.509404	-0.973117	3.23e-06	2.33e-05	1.56934	1.53634	1.60393	0.648485	0.406957	0.746302
LIF	0.510438	-0.970193	6.65e-09	1.58e-07	3.46164	3.44191	3.38496	2.39114	2.56792	2.40831
CASC8	0.5113	-0.967758	6.44e-06	4.04e-05	1.75515	1.99296	2.16495	0.911473	1.10559	0.986711
AKAP12	0.511853	-0.966199	4.38e-12	4.68e-10	10.4482	10.5707	10.5707	9.51359	9.63309	9.54357
HDAC9	0.511913	-0.96603	1.08e-05	6.2e-05	1.0635	1.33362	1.23102	0.225234	0.358967	0.144235
MLPH	0.512463	-0.964481	9.43e-12	8.9e-10	5.78285	5.71243	5.68987	4.77237	4.79527	4.72249
KRT8P3	0.512546	-0.964247	3.59e-09	9.67e-08	3.97852	4.01432	4.09514	3.08958	2.94273	3.17196
MED15	0.513069	-0.962775	3.93e-12	4.34e-10	6.0292	5.97155	6.03465	5.08162	5.06476	5.00057
PRCP	0.513725	-0.960931	1.32e-12	1.8e-10	6.31305	6.33426	6.29526	5.39853	5.33847	5.32482
ANXA3	0.514747	-0.958063	8.16e-13	1.18e-10	7.70372	7.62518	7.72967	6.72957	6.71286	6.74186
MAML3	0.514853	-0.957768	0.00116096	0.00307379	-0.0686728	0.0680435	0.590485	-1.08144	-0.813491	-0.397583
AC129492.2	0.515311	-0.956483	1.86e-06	1.49e-05	1.84323	1.74486	1.75731	0.958856	0.665953	0.86389
CYP1B1	0.515368	-0.956324	9.26e-06	5.45e-05	1.83688	1.9738	2.15313	0.98447	1.27252	0.824035
LINC01910	0.516043	-0.954436	5.06e-05	0.000223	0.471215	0.849507	0.695108	-0.313944	-0.260626	-0.268577
ATXN2	0.516517	-0.953113	3.95e-11	2.72e-09	5.69228	5.75881	5.78209	4.71048	4.8657	4.79249
DPP8	0.517528	-0.950292	1.27e-11	1.07e-09	5.46811	5.51169	5.5272	4.49144	4.58723	4.57407
CHRNB1	0.517938	-0.949148	2.98e-09	8.21e-08	3.5194	3.50685	3.47149	2.62627	2.52509	2.50431
KRT8P45	0.518705	-0.947015	0.000645	0.00186193	0.619752	0.958619	0.834906	0.444473	-0.509641	-0.315375
DNAJC10	0.518788	-0.946784	6.08e-11	3.78e-09	6.00779	6.15484	6.15705	5.12438	5.20516	5.14809
PDE5A	0.519493	-0.944824	3.5e-06	2.5e-05	2.47284	2.814	2.69305	1.72496	1.90894	1.50683
TRIM10	0.520128	-0.943061	0.00127775	0.00333057	0.198434	0.419554	-0.397583	-0.903682	-0.813491	-0.889535
KRT8	0.520479	-0.942089	3.05e-13	5.83e-11	11.7163	11.6123	11.6123	10.6805	10.7081	10.7254
GK	0.52068	-0.941531	5.85e-07	5.89e-06	2.59167	2.6719	2.46524	1.47793	1.6342	1.78674
SERPINB1	0.522623	-0.936158	1.28e-11	1.07e-09	5.10073	5.0944	5.08653	4.14553	4.1393	4.1887
TRIM46	0.522831	-0.935584	3.58e-05	0.000167	1.46426	1.36814	1.08399	0.513784	0.425283	0.173055
GLIS3	0.522891	-0.935418	6.07e-05	0.000259	0.270364	0.443452	0.25473	-0.593678	-0.638472	-0.600357
IGDCC4	0.523003	-0.935108	0.00156015	0.00395933	0.270364	0.849507	-0.00725352	-0.313944	-0.654134	-0.699144
SLC25A48	0.524332	-0.931447	2.49e-06	1.89e-05	1.52247	1.61783	1.62243	0.593481	0.616445	0.759605
LINC00460	0.525309	-0.928762	9.08e-06	5.36e-05	2.17354	1.80745	2.09494	0.947043	1.08949	1.23846
GFI1	0.525322	-0.928726	4.51e-07	4.76e-06	2.52061	2.33444	2.42635	1.52489	1.385	1.58959
CHEK1	0.525752	-0.927546	2.44e-12	2.97e-10	6.21045	6.24492	6.28304	5.30003	5.34277	5.31177
SIPA1L2	0.526139	-0.926485	6.42e-10	2.4e-08	4.52869	4.53878	4.56473	3.53172	3.73304	3.57785
KLK8	0.527032	-0.924039	5.48e-08	8.81e-07	3.71946	3.54574	3.49559	2.71392	2.54645	2.73562
EMX1	0.527493	-0.922776	1.93e-05	0.0001	1.13276	1.20194	0.920623	0.19958	0.0954936	0.198998
EZR	0.529611	-0.916994	1.62e-14	7.04e-12	10.881	10.8896	10.9241	9.98608	9.97883	9.97883
PIK3R3	0.529929	-0.916129	3.22e-06	2.33e-05	1.78966	2.014	1.94489	0.897908	0.951099	1.15387
IQCN	0.530026	-0.915864	1.26e-05	7.04e-05	1.17445	1.43989	1.39593	0.335707	0.513784	0.409593
ISPD	0.530527	-0.914501	8.02e-05	0.000326	1.10561	1.54838	1.07055	0.388195	0.248402	0.360466
NRP2	0.530726	-0.91396	1.29e-06	1.11e-05	1.78966	1.9474	1.86511	0.911473	0.976067	0.972926
PGF	0.530948	-0.913359	8.37e-08	1.24e-06	3.18706	3.14723	3.32295	2.44106	2.27716	2.20657
ZFP36	0.532051	-0.910364	5.05e-09	1.25e-07	6.01675	5.73685	5.80639	4.94346	4.8873	4.9978
FTO	0.534338	-0.904176	1.98e-11	1.53e-09	5.49299	5.5762	5.55177	4.61367	4.67605	4.61708
EOMES	0.535	-0.902389	4.51e-08	7.6e-07	2.87187	2.89089	2.82894	1.97055	1.89322	2.02624
MRTFA	0.536097	-0.899434	3.36e-10	1.45e-08	5.11879	4.99966	5.0736	4.25172	4.10143	4.14572
GAS6	0.538804	-0.892169	3.77e-10	1.59e-08	4.83101	4.73692	4.70055	3.84414	3.83399	3.91351
PDGFB	0.539173	-0.891179	2.96e-07	3.37e-06	2.93294	3.10429	2.85272	2.00016	2.06371	2.15346
SMAD3	0.53954	-0.890199	7.56e-13	1.11e-10	6.852	6.83182	6.8738	5.9478	5.982	5.9562
OXCT2	0.540279	-0.888225	0.000457	0.00139318	0.731083	0.471783	0.946272	-0.347772	-0.361227	0.189959
DBNDD2	0.541604	-0.884691	4.36e-11	2.92e-09	5.29608	5.2215	5.26898	4.39236	4.33056	4.41145
SULT2B1	0.541617	-0.884656	7.89e-06	4.76e-05	1.90295	1.62746	1.70564	0.970115	0.864828	0.746302
EPPK1	0.541866	-0.883991	1.41e-10	7.36e-09	5.26321	5.16636	5.18192	4.34901	4.35959	4.24912
PRKCQ	0.542877	-0.881302	3.26e-08	5.85e-07	2.99793	2.97484	2.97991	2.10319	2.16607	2.03499
PRSS30P	0.542984	-0.88102	0.000504	0.00151432	0.119264	0.281292	0.123933	-0.593678	-1.07103	-0.429848
AC021087.5	0.543189	-0.880474	0.00405937	0.00903323	0.60017	-0.0453908	0.602994	0.0727672	-0.673843	-0.8646
ALDH4A1	0.543747	-0.878993	4.09e-10	1.68e-08	4.24264	4.25919	4.2017	3.35796	3.32568	3.38515
BCAS4	0.54395	-0.878454	6.77e-11	4.1e-09	4.79747	4.76586	4.76374	3.92975	3.87901	3.88489
FN1	0.543961	-0.878425	2.28e-08	4.38e-07	3.88075	3.96773	3.77252	2.88416	3.04355	3.05136
FAM95B1	0.545046	-0.87555	0.00143619	0.0036864	0.0630824	0.389122	0.361089	-0.689051	-0.127415	-1.01724
DUSP2	0.546363	-0.872069	1.72e-09	5.2e-08	5.17799	5.04002	5.00913	4.28541	4.12634	4.20477
MAP3K5	0.547218	-0.869813	9.09e-10	3.13e-08	4.21345	4.22608	4.27827	3.35796	3.43539	3.31069
YLPM1	0.548162	-0.867326	1.1e-11	9.81e-10	7.32642	7.38727	7.4049	6.44642	6.57421	6.49355
SH3BP4	0.549622	-0.863487	3.59e-12	4.1e-10	6.27529	6.27989	6.29526	5.42521	5.45328	5.38051
NUDT16	0.550682	-0.860708	6.24e-09	1.5e-07	4.55777	4.75296	4.72258	3.73304	3.83399	3.88214
KRT8P33	0.551661	-0.858146	0.000517	0.00154547	0.172251	0.299474	0.203711	-0.239924	-0.781165	-0.853967
ACSL6	0.551829	-0.857707	0.00133874	0.00347184	0.312165	0.564759	0.711389	-0.707806	0.150157	-0.461295
TNIK	0.551895	-0.857533	4.14e-10	1.69e-08	5.14188	5.14006	5.24868	4.27398	4.28331	4.40035
HOXB5	0.552099	-0.857002	6.36e-07	6.25e-06	2.68917	2.59766	2.70042	1.94957	1.64035	1.84185
C2orf70	0.552662	-0.855531	1.5e-06	1.26e-05	2.34469	2.17312	2.41412	1.40555	1.46399	1.48866
SENP3-EIF4A1	0.552977	-0.854708	0.0012233	0.00321079	0.898079	0.911043	0.704392	-0.605378	0.389918	0.122082
ATP1B1	0.553887	-0.852336	3.45e-11	2.44e-09	5.36259	5.35021	5.43074	4.52852	4.5289	4.5288
AP002956.1	0.554059	-0.851889	2.63e-11	1.94e-09	5.7522	5.76494	5.68098	4.88912	4.84881	4.90629
ITPR1	0.554422	-0.850943	1.63e-08	3.3e-07	3.88842	4.05634	4.01157	3.14296	3.2181	3.04053
STEAP1	0.554573	-0.850551	4.53e-09	1.16e-07	4.38001	4.38001	4.38677	3.45415	3.46164	3.67974
DMBX1	0.554679	-0.850274	1.11e-05	6.35e-05	1.9474	1.8895	2.00313	1.36814	1.02929	0.906434
DUSP6	0.555202	-0.848915	7.71e-12	7.55e-10	6.48813	6.57554	6.49823	5.69301	5.66997	5.6535
CU633967.1	0.555591	-0.847904	0.000589	0.00172435	2.9566	3.05502	2.33444	1.6527	2.17572	1.94876
WDR63	0.555601	-0.847878	0.000125	0.000469	0.550974	0.683272	0.628031	-0.00725352	-0.233045	-0.429848
ESAM	0.555642	-0.847772	1.66e-06	1.36e-05	2.59766	2.56258	2.55653	1.8643	1.4949	1.8349
CYSRT1	0.556657	-0.84514	0.000119	0.00045	0.550974	0.590485	0.872104	-0.136095	-0.233045	-0.148655
NAV3	0.556932	-0.844428	0.000167	0.000596	1.0963	1.0502	1.49573	0.572292	0.248402	0.300596
HOXC5	0.558267	-0.840974	9.21e-05	0.000365	0.859405	1.06104	0.739111	0.192912	-0.0318591	-0.0101522
LPIN3	0.559014	-0.839044	5.51e-07	5.6e-06	2.67316	2.56258	2.5725	1.83688	1.82924	1.62243
MFNG	0.559014	-0.839043	0.000277	0.000915	0.0918174	0.232246	-0.00725352	-0.643082	-0.708913	-0.84322
CHST11	0.56008	-0.836295	1.86e-09	5.5e-08	4.35262	4.26506	4.28577	3.38034	3.51831	3.48766
BVES	0.560795	-0.834456	1.06e-05	6.09e-05	1.85723	2.05627	1.80781	1.15454	0.913634	1.16731
F2RL1	0.561068	-0.833752	4.02e-13	7.38e-11	7.89532	7.88705	7.92219	7.08429	7.06315	7.05615
SYBU	0.561538	-0.832545	3.69e-09	9.88e-08	4.28563	4.37251	4.32394	3.51022	3.58225	3.38915
FOXF1	0.56189	-0.83164	0.000187	0.000655	1.38992	1.62746	1.43098	0.309165	0.616445	1.01996
CD274	0.562721	-0.829507	0.000102	0.000398	1.03934	1.09701	0.730995	0.0911345	0.172145	0.114049
HTR1D	0.562887	-0.829083	4.58e-07	4.83e-06	2.54528	2.6889	2.64427	1.8853	1.80693	1.70564
OCLN	0.563224	-0.828219	1.54e-10	7.91e-09	5.38435	5.51047	5.46119	4.63166	4.65232	4.58779
EBF2	0.563314	-0.827988	1.52e-06	1.27e-05	2.02124	2.03922	2.06435	1.25428	1.26532	1.12038
HLA-F	0.563442	-0.827662	2.77e-06	2.07e-05	2.27447	2.10171	2.33763	1.46795	1.32373	1.4428
SP2-AS1	0.563479	-0.827566	5.13e-05	0.000225	1.37702	1.47614	1.59835	0.433137	0.902021	0.61217
CFAP57	0.564042	-0.826126	0.00035	0.00111359	0.0525123	-0.0587142	0.199247	-0.707806	-0.873713	-0.699144
SLC35G2	0.564828	-0.824117	0.000696	0.00198448	1.11877	1.62746	1.56229	1.02637	0.358967	0.491482
ART5	0.565133	-0.823339	0.000102	0.000397	0.849507	0.660317	0.832762	-0.0379647	-0.199252	0.114049
FES	0.56578	-0.821687	1.69e-06	1.38e-05	3.14891	2.98977	3.03756	2.36852	1.99924	2.36267
DDN-AS1	0.56617	-0.820693	1.37e-05	7.51e-05	2.38813	2.11661	2.17354	1.60335	1.20894	1.41951
ZBTB20	0.566567	-0.819681	1.88e-06	1.51e-05	3.39328	3.3665	3.57256	2.41372	2.84998	2.58337
KRT18	0.566859	-0.818939	5.04e-13	8.63e-11	10.5048	10.4482	10.4923	9.66056	9.62605	9.70194
SGK1	0.567055	-0.81844	3.59e-06	2.55e-05	1.85723	1.82036	1.80781	1.12143	0.976067	0.938865
SUPT5H	0.568152	-0.815651	3.74e-12	4.23e-10	7.86555	7.80408	7.76802	6.99594	7.01797	6.97612
LETM2	0.569283	-0.812782	2.23e-07	2.71e-06	3.31559	3.5525	3.41513	2.69337	2.52061	2.64532
KLK7	0.570035	-0.810877	4.88e-09	1.22e-07	3.96898	4.02748	4.00913	3.27504	3.11386	3.19373
ALDH16A1	0.5705	-0.809702	5.14e-10	2.01e-08	4.74659	4.7104	4.63988	3.90798	3.86348	3.89815
KIAA1324	0.570762	-0.809038	0.000796	0.002222	0.387269	0.0680435	0.512654	-0.266027	-0.491674	-0.699144
LRRC37A9P	0.571076	-0.808245	0.000625	0.00180997	0.172251	0.710896	0.489696	-0.433221	-0.260626	-0.356384
PER3	0.571286	-0.807714	1.29e-05	7.16e-05	2.34469	2.13825	2.46854	1.49813	1.65867	1.35672
KLHL35	0.571353	-0.807546	0.000331	0.00106443	0.832508	0.443452	0.801927	-0.234369	0.0455571	-0.176047
IER3	0.571435	-0.807339	1.08e-11	9.68e-10	8.74036	8.65596	8.65223	7.91831	7.81529	7.89407
SLC16A5	0.571684	-0.80671	3.42e-07	3.78e-06	3.74634	3.75533	3.65567	2.98447	3.05874	2.6889
MYT1	0.572095	-0.805674	2.35e-05	0.000117	2.38575	2.26454	2.25896	1.48333	1.77848	1.21052
RNF43	0.572271	-0.805231	2.65e-10	1.2e-08	4.96477	5.07207	5.04144	4.21232	4.20629	4.24564
SIK1B	0.572292	-0.805177	2.37e-08	4.51e-07	4.26522	4.29813	4.14592	3.33656	3.40123	3.55413
TMEM158	0.572728	-0.804078	8.84e-08	1.29e-06	3.66526	3.61828	3.44258	2.78286	2.76103	2.77099
SCAMP2	0.573093	-0.803158	8.45e-11	5e-09	5.95307	5.86252	5.90072	5.09841	5.15706	5.04845
SYP	0.574065	-0.800714	0.000285	0.000937	0.458233	0.46077	0.334434	-0.356384	-0.199252	-0.600357
ABCB1	0.574249	-0.800252	1.27e-06	1.1e-05	2.50969	2.74202	2.5928	1.74486	1.87541	1.82107
LMCD1	0.576064	-0.795699	9.57e-07	8.74e-06	2.45694	2.47296	2.62002	1.64801	1.74137	1.76827
SERPINB9	0.576493	-0.794626	8.99e-11	5.25e-09	5.36374	5.41321	5.40407	4.54327	4.61595	4.63566
UBN1	0.577091	-0.793129	1.27e-11	1.07e-09	6.31785	6.3461	6.31341	5.50836	5.58056	5.50707
PIGO	0.577206	-0.792841	1.53e-10	7.88e-09	4.77787	4.80563	4.79276	4.0182	3.98872	3.99249
AK7	0.577518	-0.792062	0.000183	0.000644	1.17445	1.15454	1.17186	0.593481	0.513784	0.0189062
PPM1J	0.578045	-0.790746	4.04e-05	0.000185	1.36814	1.4555	1.61837	0.72025	0.531101	0.829255
LRRC4B	0.578129	-0.790536	0.000128	0.000479	0.614081	0.69817	0.677606	-0.266027	0.0215631	-0.148655
ELOVL3	0.578212	-0.790331	5.11e-06	3.37e-05	2.93294	2.66875	2.60633	1.89322	2.05102	1.87858
PPP4R4	0.579697	-0.786629	2.14e-05	0.000109	1.88672	1.90894	2.02043	1.10561	0.962691	1.39661
KCNIP3	0.579783	-0.786416	0.00277152	0.00650751	0.422918	0.590485	0.657432	-0.313944	0.298228	-0.699144
CAMK1	0.580838	-0.783791	2.02e-09	5.87e-08	4.26005	4.28019	4.29321	3.57239	3.47308	3.44166
PAX6	0.581043	-0.783282	1.14e-05	6.52e-05	1.56934	1.71817	1.59835	0.927961	0.834001	0.781512
PARD6B	0.582787	-0.778959	1.19e-07	1.64e-06	3.95928	4.04837	3.97997	3.04769	3.37762	3.20917
DBP	0.582916	-0.778641	5.54e-08	8.88e-07	3.8472	3.68706	3.67599	2.93915	2.90963	3.02506
FUT8	0.584813	-0.773952	1.26e-10	6.85e-09	5.14808	5.1057	5.14188	4.32622	4.35506	4.39088
TMEM59L	0.585124	-0.773186	1.57e-07	2.06e-06	2.95318	2.87313	2.90837	2.16242	2.08038	2.17572
TRPC1	0.58525	-0.772874	0.00012	0.000454	1.24018	1.51297	1.11918	0.433137	0.602525	0.516191
KRT222	0.585799	-0.771522	3.55e-06	2.53e-05	2.97546	3.09843	3.17712	2.35663	2.0972	2.50061
FSIP1	0.586516	-0.769757	0.000164	0.000585	0.70968	0.620583	0.711389	0.0911345	-0.199252	-0.148655
SUGCT	0.587286	-0.767866	1.12e-05	6.42e-05	2.14564	2.34709	2.16495	1.64801	1.40127	1.32184
JCAD	0.587635	-0.767009	3.29e-09	8.94e-08	4.85932	5.00937	4.9644	4.10715	4.23725	4.18369
AL365203.2	0.588253	-0.765491	3.82e-06	2.68e-05	2.79552	2.7092	2.91373	2.23489	2.02377	1.87202
PPP1R14C	0.588738	-0.764302	1.54e-07	2.03e-06	3.96584	4.03979	4.18989	3.2485	3.22916	3.42721
SNHG9	0.589215	-0.763134	5.06e-08	8.31e-07	4.04517	3.86701	3.91903	3.09174	3.24805	3.19079
TSPAN12	0.589287	-0.762957	1.12e-07	1.57e-06	3.28034	3.44591	3.31588	2.61483	2.60099	2.54128
TRIM72	0.589566	-0.762276	3.62e-10	1.54e-08	5.55948	5.43827	5.47292	4.73733	4.68831	4.75892
MTCL1	0.59043	-0.760162	7.65e-10	2.75e-08	4.90532	4.86827	4.88267	4.13757	4.18616	4.04911
STOM	0.590954	-0.758883	2.06e-10	9.93e-09	5.48362	5.4917	5.53951	4.77796	4.78244	4.67736
TENT5B	0.591604	-0.757297	2.5e-07	2.97e-06	2.96444	2.96632	2.98447	2.21367	2.11655	2.31947
AADACP1	0.592653	-0.75474	6.72e-05	0.000281	1.0502	1.29368	1.1426	0.463302	0.358967	0.409593
AL158206.1	0.593647	-0.752323	0.00244502	0.0058379	1.17445	1.69303	1.79889	1.08159	0.385294	0.986711
FLVCR2	0.594147	-0.751108	0.000171	0.000608	1.24018	1.49223	1.19635	0.335707	0.602525	0.730878
TNFRSF19	0.594413	-0.750463	0.000208	0.000717	1.16766	1.43989	1.1426	0.70968	0.298228	0.516191
RALGAPA1P1	0.594934	-0.749198	0.00251592	0.00597411	-0.0530093	0.0950048	0.557254	-0.349408	-0.643082	-0.643082
NGFR	0.595001	-0.749037	3.31e-08	5.94e-07	3.57072	3.48658	3.55097	2.81066	2.82604	2.72156
CBX7	0.595053	-0.748909	6.3e-07	6.2e-06	3.07635	3.01726	3.05187	2.42462	2.34433	2.13229
BX537318.1	0.595203	-0.748546	0.00176839	0.00441641	0.0918174	0.26607	0.0464563	-0.707806	-0.260626	-0.889535
REEP2	0.596486	-0.74544	3.25e-06	2.34e-05	2.40831	2.36162	2.25311	1.58469	1.50683	1.69965
MRPS31	0.597066	-0.744037	2.07e-09	5.97e-08	4.81758	4.91862	4.91298	4.15319	4.1923	4.07077
SQLE	0.597149	-0.743838	3.99e-11	2.74e-09	6.39558	6.39753	6.39959	5.66167	5.70483	5.59335
KIF26B	0.597396	-0.743241	0.00143472	0.0036839	1.33362	0.983796	1.41876	0.25235	0.913634	0.300596
GADD45B	0.597982	-0.741825	9.28e-09	2.08e-07	4.1923	4.09126	4.10654	3.45796	3.34851	3.36218
ALDH3B1	0.598283	-0.741099	1.85e-08	3.66e-07	4.41491	4.30251	4.23932	3.64161	3.5503	3.54457
TGM2	0.59836	-0.740915	2.95e-07	3.36e-06	3.38379	3.21306	3.23993	2.57945	2.45196	2.58723
ABO	0.598451	-0.740695	0.00180878	0.00450258	0.22331	0.137628	0.334434	-0.0953921	-0.708913	-0.699144
IL17RB	0.5986	-0.740336	2.83e-07	3.25e-06	3.61849	3.40848	3.59762	2.78286	2.86409	2.74754
KIAA0040	0.598738	-0.740003	2.58e-08	4.85e-07	3.58876	3.59508	3.59099	2.89103	2.89234	2.77099
CRYBG2	0.599311	-0.738623	3.01e-07	3.41e-06	3.69454	3.65187	3.47879	2.91452	2.91853	2.77535
MYCL	0.599343	-0.738547	7.28e-07	6.98e-06	2.98706	3.06489	2.899	2.32603	2.28095	2.13229
LHFPL2	0.599407	-0.738392	8e-08	1.19e-06	4.66853	4.72653	4.76992	4.13317	4.01051	3.8117
CYP2J2	0.600081	-0.73677	3.65e-05	0.00017	1.35478	1.33362	1.354	0.648485	0.489696	0.701553
DLX1	0.600437	-0.735916	0.000146	0.000532	1.32157	1.34332	1.39593	0.810035	0.335707	0.730878
GPAT2P1	0.600507	-0.735748	6.32e-05	0.000267	1.66343	1.45487	1.71088	0.760623	0.813426	1.04142
NCEH1	0.600658	-0.735385	2.76e-10	1.25e-08	5.19785	5.19702	5.12577	4.42723	4.45881	4.42723
CHST1	0.602427	-0.731143	0.00067	0.00192502	0.22331	0.0201501	0.0959823	-0.540872	-0.708913	-0.600357
MTUS1	0.602527	-0.730902	1.75e-10	8.7e-09	7.60575	7.70063	7.72661	6.92284	7.01446	6.9016
CLOCK	0.602781	-0.730295	5.39e-10	2.08e-08	6.82071	6.94598	6.98697	6.18177	6.22769	6.15297
ETS1	0.602856	-0.730116	7.1e-06	4.38e-05	2.74754	2.85851	2.84259	1.93264	2.32704	1.97712
GAL3ST1	0.602966	-0.729851	0.00342775	0.0078255	1.10561	0.303749	0.657432	-0.0379647	0.0455571	-0.148655
PLCE1	0.602986	-0.729805	3.06e-06	2.23e-05	2.98706	3.24508	3.16842	2.39814	2.53933	2.26954
BIRC3	0.603248	-0.729176	6.01e-05	0.000257	1.58913	1.62746	1.52119	0.911473	0.634531	1.01996
LBX2-AS1	0.603704	-0.728086	0.00306899	0.00711366	-0.128757	0.398406	0.25473	-0.851038	-0.459677	-0.356384
MS4A15	0.603735	-0.728013	0.00110371	0.00294074	1.33362	0.69817	0.920623	0.25235	0.248402	0.256428
PLK3	0.604532	-0.726109	1.24e-09	3.94e-08	4.63835	4.62662	4.58632	3.90449	3.84397	3.92747
MRM1	0.605081	-0.724799	3.96e-09	1.04e-07	4.41391	4.51354	4.49805	3.69685	3.76332	3.78928
ERFE	0.606024	-0.722553	4.79e-07	4.99e-06	2.70019	2.7092	2.73117	1.99151	1.94131	2.0434
ABI1	0.607414	-0.719248	6.19e-10	2.32e-08	5.49735	5.44189	5.39446	4.76607	4.74033	4.66987
EFR3B	0.608188	-0.71741	0.000661	0.00189933	0.939701	0.983796	0.88777	0.534736	0.248402	-0.111569
SMIM11A	0.608659	-0.716294	0.0048571	0.0105191	3.32727	3.68544	2.72852	2.86758	2.42578	2.33236
CKLF	0.611037	-0.710669	9.63e-09	2.14e-07	3.98478	4.04494	3.96601	3.27669	3.264	3.32503
CCNB3	0.611344	-0.709944	8.33e-06	4.98e-05	2.11078	2.05627	1.94489	1.32014	1.36814	1.29051
SYDE1	0.611634	-0.709259	6.92e-07	6.7e-06	3.42427	3.19504	3.25915	2.56674	2.54401	2.63743
RASGRP1	0.61173	-0.709034	3.84e-05	0.000178	1.63382	1.90894	1.82036	1.16706	1.04907	1.0311
HPSE	0.611753	-0.70898	1.47e-08	3.05e-07	4.72266	4.77279	4.83955	4.17325	3.97349	4.07077
GREB1L	0.611846	-0.70876	1.88e-07	2.34e-06	3.74634	3.83419	3.88336	3.1189	3.22631	2.98706
AC015813.2	0.611876	-0.70869	8.39e-05	0.000338	1.98687	1.84726	1.83227	0.903675	1.37751	1.23247
C15orf41	0.61258	-0.70703	4.96e-08	8.18e-07	3.64947	3.58496	3.67599	2.86409	2.93327	2.98706
AOC3	0.613595	-0.704642	0.000202	0.0007	1.6173	1.42159	1.36778	0.501225	0.864828	0.906434
ZNF321P	0.613798	-0.704164	0.00550742	0.0117345	-0.214068	0.303749	0.1535	-0.56379	-0.325257	-0.98365
ST8SIA6	0.614554	-0.702389	0.000358	0.00113477	1.0635	1.39431	1.0502	0.534736	0.313051	0.570929
NT5DC3	0.614653	-0.702155	3.26e-09	8.88e-08	5.19534	5.31844	5.3189	4.53713	4.64078	4.54531
MAP3K8	0.614663	-0.702133	0.000861	0.00237855	0.471215	0.602994	0.569207	0.0911345	-0.417749	-0.111569
CHD5	0.615001	-0.701339	3.66e-08	6.44e-07	3.5859	3.60672	3.64541	2.86811	2.9644	2.89617
AC008403.1	0.615338	-0.70055	1.41e-07	1.88e-06	4.4886	4.23088	4.34925	3.62398	3.6907	3.64512
ECHDC3	0.615538	-0.70008	1.84e-07	2.31e-06	3.29638	3.29868	3.19957	2.59766	2.5976	2.49911
EML2	0.615631	-0.699863	8.28e-10	2.91e-08	5.29767	5.25872	5.19458	4.55797	4.51341	4.58165
KCNMB2-AS1	0.615812	-0.699438	0.000498	0.00149808	0.387269	0.26607	0.34736	-0.313944	-0.354495	-0.429848
KRT7	0.616889	-0.696918	0.000825	0.00228913	0.832508	1.25428	0.832762	0.388195	0.125784	0.335707
AC145207.5	0.617333	-0.695879	1.44e-06	1.22e-05	3.37334	3.44863	3.54898	2.80294	2.5976	2.89617
EGR3	0.618252	-0.693732	0.000192	0.000671	1.71316	1.32072	1.46336	0.883671	0.709425	0.824035
DUSP1	0.618327	-0.693558	3.59e-09	9.67e-08	5.35994	5.28132	5.27559	4.5707	4.55589	4.70966
TNS3	0.618483	-0.693193	2.79e-08	5.1e-07	4.14941	4.12793	4.12033	3.39374	3.54898	3.36671
FRAS1	0.61866	-0.692781	6.53e-09	1.56e-07	5.44212	5.56197	5.59018	4.81214	4.92168	4.77909
TDRKH	0.618894	-0.692236	3.59e-07	3.93e-06	3.03152	3.09976	3.17992	2.43199	2.39163	2.41412
ZNF239	0.619043	-0.691888	1.41e-06	1.19e-05	2.72516	2.814	2.90542	2.12121	2.17312	2.07255
CHST7	0.619137	-0.691669	1.18e-07	1.64e-06	3.68706	3.5424	3.66373	2.98447	2.88484	2.95185
JKAMP	0.619712	-0.690331	4.98e-10	1.97e-08	5.61714	5.70406	5.65632	5.01125	4.91628	4.98321
AL136295.5	0.61977	-0.690196	0.0277199	0.047316	1.78266	2.36864	2.08645	0.425574	1.8349	1.84726
TLL2	0.619774	-0.690186	0.000394	0.00123	0.813426	0.849507	1.03249	0.033907	0.198956	0.385294
UBASH3B	0.620086	-0.689459	2.31e-10	1.1e-08	5.89619	5.97486	5.94234	5.25028	5.28974	5.20421
VPS41	0.620299	-0.688964	8.86e-10	3.07e-08	5.57891	5.60749	5.6059	4.82007	4.96903	4.93139
TEF	0.620419	-0.688686	1.28e-08	2.71e-07	4.75424	4.77279	4.74559	4.15319	4.10965	3.9454
FAM220A	0.620476	-0.688552	0.0110611	0.0213947	4.18616	4.32882	3.22059	3.34526	3.0928	3.25089
FOXA3	0.620731	-0.68796	1.19e-06	1.04e-05	3.45174	3.45747	3.27131	2.68729	2.6074	2.82801
PTCH1	0.620846	-0.687692	1.8e-05	9.45e-05	1.89613	2.11661	1.9952	1.30756	1.36814	1.27045
FMNL3	0.620944	-0.687464	1.98e-05	0.000102	2.20632	2.3579	2.33763	1.41951	1.7632	1.64105
CSF1	0.621593	-0.685959	0.000404	0.00125506	1.14241	1.15454	1.25561	0.415575	0.782745	0.277739
SLC37A2	0.621749	-0.685596	1.36e-05	7.5e-05	1.99792	2.05627	2.05104	1.49813	1.27252	1.29051
HRK	0.622036	-0.68493	9.11e-05	0.000362	1.76482	1.82864	1.68456	1.23939	1.15454	0.834001
GOLGA7B	0.622062	-0.684871	0.000621	0.00180083	1.45265	1.18725	1.09783	0.556036	0.335707	0.798854
AMOTL2	0.622247	-0.68444	1.13e-09	3.66e-08	5.76336	5.75418	5.67394	5.00132	5.1186	5.01416
HOXA5	0.623867	-0.68069	3.35e-06	2.41e-05	2.93939	2.86219	2.80825	2.36008	2.14564	2.07255
HIVEP1	0.623998	-0.680388	4.42e-06	3e-05	2.97987	3.17794	3.09791	2.47734	2.51113	2.22682
DTX4	0.625258	-0.677477	7.35e-08	1.11e-06	3.83773	3.73489	3.74038	3.10738	3.14845	3.02049
TPCN1	0.625792	-0.676245	8.41e-09	1.92e-07	4.38163	4.27263	4.35626	3.67161	3.64947	3.66003
CTRL	0.625906	-0.675982	2.39e-06	1.83e-05	2.42126	2.47121	2.43739	1.80745	1.7935	1.70239
SRPX2	0.626	-0.675766	0.00126406	0.00329785	0.722887	0.398406	0.304973	-0.164822	-0.260626	-0.176047
DOCK5	0.626248	-0.675195	8.15e-10	2.89e-08	6.05514	6.10174	6.12892	5.35908	5.49961	5.39739
GJC1	0.626681	-0.674197	4.73e-09	1.19e-07	5.90995	6.05739	6.0872	5.29855	5.36467	5.36775
AC093673.1	0.626727	-0.674092	0.00475256	0.0103219	0.387269	0.330615	0.227385	-0.851038	-0.0520824	-0.208108
HOXA6	0.626829	-0.673857	0.00048	0.00145304	1.16766	1.11835	0.88777	0.488307	0.489696	0.173055
RBM47	0.627024	-0.673409	4.62e-08	7.74e-07	4.97306	5.17853	5.02827	4.36538	4.46075	4.33185
CGNL1	0.627383	-0.672581	9.47e-06	5.55e-05	2.84191	3.16842	2.97991	2.38558	2.3579	2.23683
CPM	0.627459	-0.672406	1.8e-06	1.46e-05	2.86811	3.08073	2.92608	2.27606	2.32075	2.26263
ZNF503	0.627946	-0.671287	1.5e-09	4.64e-08	5.66288	5.57371	5.58642	4.92698	5.00162	4.87691
SAMD9	0.628335	-0.670394	1.31e-08	2.75e-07	4.58478	4.6567	4.6787	3.88919	4.04777	3.96555
CELSR1	0.628759	-0.669421	8.48e-08	1.25e-06	5.10631	5.0605	5.2278	4.34565	4.58047	4.44958
DLGAP1-AS1	0.629302	-0.668176	0.000785	0.00219395	0.532453	0.303749	0.385294	-0.313944	-0.297187	-0.176047
IRF2BPL	0.629368	-0.668025	1.01e-09	3.38e-08	6.58806	6.52509	6.42732	5.82272	5.86568	5.84657
RPP25	0.629508	-0.667704	2.96e-07	3.37e-06	4.34425	4.11429	4.1415	3.48261	3.52068	3.58856
RBP7	0.630135	-0.666268	6.82e-09	1.61e-07	5.0504	4.92898	4.97247	4.34704	4.24826	4.36068
LINC02609	0.630429	-0.665595	0.00116263	0.00307635	0.614081	0.502025	0.711389	0.0616386	0.0954936	-0.331709
FRS3	0.630896	-0.664527	0.000115	0.000438	1.34332	1.17376	1.3579	0.593481	0.616445	0.666959
DUSP4	0.631538	-0.663058	1.82e-11	1.46e-09	6.67935	6.69683	6.69293	6.01646	6.02803	6.03532
HOXA10	0.633311	-0.659014	6.1e-09	1.47e-07	5.46102	5.31502	5.43483	4.80189	4.72434	4.70868
MT1E	0.634114	-0.657187	1.77e-09	5.29e-08	7.24569	7.10722	7.16115	6.50393	6.45028	6.58875
PRSS23	0.63449	-0.656331	2.56e-06	1.94e-05	2.49911	2.51318	2.5501	1.8643	1.92306	1.8024
PIK3AP1	0.635023	-0.655119	2.03e-08	3.95e-07	4.44364	4.57377	4.46975	3.87912	3.78648	3.8627
C14orf132	0.635231	-0.654648	9.05e-06	5.35e-05	2.09775	2.14527	2.08748	1.49813	1.47389	1.39661
ZNF701	0.635232	-0.654643	3.02e-06	2.2e-05	2.73738	2.82371	2.86334	2.15864	2.25688	2.04001
PRKAA2	0.635236	-0.654635	1.99e-06	1.57e-05	3.13761	3.25118	3.16527	2.56674	2.64505	2.37527
C17orf113	0.63654	-0.651676	0.00094	0.0025624	0.781368	0.76259	0.462603	-0.00725352	-0.0520824	0.114049
CDIP1	0.636902	-0.650856	1.47e-06	1.24e-05	3.72584	3.89078	3.78363	3.30862	3.00145	3.15724
AL162151.2	0.635538	-0.65395	0.0998549	0.144653	0.625222	0.174914	1.29385	0.938976	0.118126	-0.903682
KREMEN1	0.636957	-0.650733	6.65e-10	2.47e-08	5.79869	5.7273	5.69043	5.07606	5.08063	5.10687
GATA3	0.637047	-0.650528	3.07e-05	0.000147	1.68142	1.75444	1.74602	1.08159	1.12748	1.01996
ACTA2	0.63705	-0.650521	7.72e-05	0.000316	2.23642	1.97712	2.11696	1.41027	1.63533	1.3149
LTBP3	0.637344	-0.649856	5.98e-10	2.27e-08	6.73109	6.58612	6.64561	6.00869	5.99789	6.00586
AZIN2	0.637366	-0.649805	0.000296	0.000967	1.30688	1.54097	1.63828	1.01258	0.730673	0.811019
CGN	0.63781	-0.648801	5.36e-08	8.68e-07	3.76765	3.80624	3.85974	3.19411	3.18076	3.11325
ELF3	0.637921	-0.648551	2.69e-09	7.53e-08	6.63183	6.46325	6.52759	5.93359	5.85118	5.89307
DGKH	0.638925	-0.646281	7.3e-07	6.99e-06	3.7492	3.76718	3.81405	3.10738	3.28676	2.98706
AC027097.1	0.639255	-0.645537	0.000247	0.000831	1.55206	1.65905	1.45487	0.938753	1.09399	0.690406
MAP3K14	0.639682	-0.644573	2.82e-06	2.09e-05	3.21251	3.46682	3.35219	2.65469	2.65257	2.79605
ALOXE3	0.639748	-0.644424	1.48e-05	8.04e-05	2.29966	2.11661	2.1991	1.52489	1.61837	1.52968
GAD1	0.639955	-0.643957	5.34e-06	3.48e-05	2.39797	2.39743	2.33763	1.80297	1.6657	1.7404
ARAP3	0.640657	-0.642376	5.97e-08	9.39e-07	4.40395	4.31978	4.50176	3.76951	3.79803	3.72767
RHPN2	0.640721	-0.642233	8.03e-11	4.78e-09	6.1977	6.21558	6.21266	5.54622	5.55734	5.59556
FAM167A	0.641096	-0.641387	2.14e-05	0.000109	2.38575	2.44883	2.33763	1.77015	1.58224	1.9088
PXYLP1	0.642552	-0.638115	1.41e-07	1.88e-06	4.2675	4.47335	4.3855	3.79607	3.6907	3.73341
PUS10	0.642723	-0.637731	5.15e-05	0.000226	1.76482	1.84943	1.73214	1.10561	1.06212	1.27045
LBHD1	0.642784	-0.637594	0.00226655	0.00547071	0.703658	0.493766	0.684462	-0.354495	0.114049	0.185595
MAP1A	0.643878	-0.63514	3.53e-07	3.89e-06	4.12705	4.13094	4.11245	3.47523	3.63542	3.34563
H19	0.64468	-0.633345	0.00105404	0.00282111	2.04447	1.58943	1.51209	0.997135	1.02929	1.21052
RIMBP3	0.644841	-0.632984	0.000981	0.00265542	0.69817	0.71664	0.85339	0.151145	0.305289	-0.0953921
HES2	0.644854	-0.632955	1.89e-06	1.51e-05	3.08842	3.08752	3.03315	2.35216	2.37816	2.57945
JUNB	0.645333	-0.631885	3.62e-09	9.71e-08	7.16678	7.02272	6.99487	6.4515	6.38802	6.44976
RSPH3	0.645888	-0.630643	1.87e-07	2.34e-06	4.15811	4.26	4.31586	3.50539	3.68007	3.64933
ANK1	0.646155	-0.630047	0.0027772	0.00651731	0.442477	0.502025	0.227385	-0.266027	-0.459677	0.0189062
FAM131C	0.646458	-0.629372	4.96e-06	3.29e-05	3.59781	3.31417	3.45171	2.93308	2.77874	2.767
AC027031.2	0.646594	-0.629067	3.68e-06	2.59e-05	2.95318	2.88416	2.76478	2.16242	2.26454	2.28146
AC022784.1	0.646847	-0.628502	0.00223072	0.00539622	0.198434	0.330615	0.0773554	-0.313944	-0.593678	-0.356384
SDC4	0.647038	-0.628078	1.46e-10	7.53e-09	6.62215	6.65305	6.61077	6.05015	5.9691	5.98464
KCNN4	0.647232	-0.627646	4.84e-09	1.21e-07	4.76586	4.7672	4.80027	4.20552	4.09558	4.15414
C16orf45	0.647357	-0.627366	1.11e-06	9.9e-06	3.14891	3.32958	3.30619	2.61483	2.65562	2.63296
ZNF469	0.647489	-0.627072	6.66e-08	1.02e-06	4.06198	3.97797	3.93689	3.33348	3.40086	3.35659
GPAT2	0.647556	-0.626923	1.16e-08	2.5e-07	5.52946	5.54291	5.55544	5.03741	4.882	4.83294
UBR5-AS1	0.647774	-0.626439	0.00314411	0.0072574	0.442477	0.043852	0.276133	-0.540872	-0.354495	-0.235693
LMO2	0.647952	-0.626042	0.0015281	0.00389161	1.49657	1.56441	1.24079	0.488307	0.817579	1.10561
FAM234B	0.64852	-0.624776	3.42e-08	6.09e-07	4.39643	4.46075	4.45981	3.91289	3.7752	3.76177
SH2D2A	0.649247	-0.623161	8.66e-05	0.000346	2.20087	2.16331	2.15822	1.7849	1.54536	1.33362
NKD1	0.649352	-0.622927	3.9e-06	2.71e-05	3.75841	3.5584	3.49794	3.0957	2.90592	2.95185
TNFRSF11A	0.649676	-0.622207	0.000364	0.00114833	1.91189	1.87334	2.08057	1.28051	1.10559	1.62243
SPEF2	0.650235	-0.620967	0.000605	0.00176198	1.03934	1.14157	1.08399	0.556036	0.616445	0.227385
GDA	0.650342	-0.620729	9.27e-10	3.17e-08	6.53716	6.61322	6.65873	5.93628	6.00501	6.00444
USP2	0.650562	-0.620241	1.89e-06	1.51e-05	3.21251	3.12607	3.06909	2.53489	2.59271	2.41412
EID2B	0.650929	-0.619428	0.00553131	0.0117738	0.422918	0.76259	0.512654	-0.0726825	0.298228	-0.397583
HES6	0.651597	-0.617948	3.4e-07	3.77e-06	5.44118	5.25289	5.20973	4.76497	4.58286	4.70736
APOBEC3C	0.651999	-0.617057	2.6e-10	1.19e-08	6.0116	6.01221	5.9951	5.40645	5.34749	5.41576
LINC00511	0.652612	-0.615702	4.66e-08	7.78e-07	4.15658	4.22608	4.25806	3.53172	3.62121	3.63732
ZNF827	0.652636	-0.615649	5.32e-08	8.65e-07	5.18329	5.13111	5.24686	4.53317	4.68748	4.48632
FAM81A	0.652902	-0.615061	9.78e-06	5.7e-05	3.08052	3.26899	3.26328	2.41579	2.63395	2.70957
CPLX1	0.65296	-0.614933	6.91e-08	1.06e-06	4.45623	4.31252	4.3043	3.74374	3.72026	3.76349
ST3GAL6-AS1	0.653015	-0.614812	0.00147898	0.00378206	0.241622	0.167843	0.227385	-0.395113	-0.354495	-0.461295
TMPPE	0.653128	-0.614562	0.00180146	0.00448866	1.27939	1.29368	1.07834	0.668667	0.872104	0.256428
MAGEE1	0.653335	-0.614106	5.25e-06	3.43e-05	2.89918	2.75831	2.78292	2.24752	2.25896	2.08748
SMURF2	0.653474	-0.613798	1.63e-10	8.24e-09	7.50553	7.61136	7.56271	6.95157	6.96367	6.92324
PAPLN	0.653836	-0.612999	0.00243124	0.00580902	0.0257531	-0.0908941	0.0959823	-0.593678	-0.654134	-0.559924
MZF1-AS1	0.654364	-0.611834	0.00138106	0.00356522	0.761091	0.564759	0.801927	-0.0726825	0.0773554	0.277739
NRP1	0.655545	-0.609233	3.29e-06	2.37e-05	3.04721	3.20729	3.04053	2.56674	2.49909	2.40831
SLC27A1	0.655601	-0.60911	6.27e-06	3.95e-05	2.80804	2.71996	2.73585	2.28669	2.08678	2.07255
FHL2	0.655757	-0.608767	3.85e-10	1.6e-08	6.39724	6.38958	6.35103	5.81717	5.72198	5.77497
TNFRSF10D	0.656239	-0.607706	7.07e-10	2.59e-08	5.86378	5.93286	5.94946	5.28331	5.32079	5.31823
MBNL1-AS1	0.656577	-0.606964	0.00189168	0.00468035	0.849507	0.994469	0.801927	0.415575	0.44743	-0.0379647
HTR7P1	0.656757	-0.606568	0.00981222	0.0192593	0.458233	0.808552	0.424993	0.174122	-0.491674	0.227385
CYP1A1	0.657062	-0.605897	0.00377086	0.00848834	0.70968	0.419554	0.304973	-0.136095	-0.325257	0.0830467
SH3PXD2A	0.657352	-0.605262	7.22e-08	1.09e-06	4.05929	3.98996	4.11837	3.46488	3.43101	3.45631
ADPRH	0.657509	-0.604918	2.59e-05	0.000128	2.48064	2.5928	2.34145	1.8853	1.79867	1.92455
ACCS	0.657572	-0.604778	0.00756402	0.0154059	0.422918	0.232246	-0.116445	-0.266027	-0.354495	-0.654134
TTN-AS1	0.657814	-0.604249	0.00103718	0.0027857	1.0635	0.926526	1.0502	0.14282	0.570865	0.491482
GLDC	0.657998	-0.603845	1.61e-05	8.63e-05	2.39703	2.62095	2.49564	1.8643	1.89849	1.94233
AC009237.14	0.658	-0.603841	0.00345818	0.00788255	0.14634	-0.00913149	0.368604	-0.356384	-0.516167	-0.429848
FOXL1	0.658189	-0.603427	0.00749391	0.0152966	0.198434	0.167843	0.774028	-0.234369	-0.260626	-0.176047
PCDH1	0.658241	-0.603313	1.48e-07	1.97e-06	4.49146	4.46913	4.34331	3.86348	3.74634	3.88999
CRABP2	0.658486	-0.602775	2.53e-09	7.16e-08	7.8121	7.69372	7.68118	7.15835	7.05891	7.16263
MYL9	0.658803	-0.60208	5.03e-08	8.28e-07	5.81361	5.67828	5.68798	5.20973	5.02052	5.14858
CFAP69	0.658978	-0.601699	0.00180484	0.00449451	0.270364	0.232246	0.424993	-0.313944	-0.354495	-0.208108
LAMC3	0.65907	-0.601496	1.87e-08	3.7e-07	4.6483	4.63034	4.56003	4.0422	4.03979	3.95201
TTC31	0.659457	-0.60065	8.5e-08	1.25e-06	4.12103	4.11608	4.24088	3.52055	3.57212	3.58043
GLIDR	0.661239	-0.596756	0.00412673	0.00914564	0.101337	-0.0387516	0.357338	-0.509641	-0.369184	-0.50106
KLLN	0.661663	-0.595832	0.00106061	0.00283518	0.650175	0.69817	0.590485	-0.0953921	0.0954936	0.144235
EPHA2	0.661873	-0.595375	6.84e-11	4.13e-09	7.39335	7.38251	7.34464	6.80224	6.78274	6.74973
LGR4	0.662057	-0.594973	1.2e-07	1.66e-06	4.02714	4.09726	4.09777	3.39374	3.54898	3.48766
SKAP2	0.662847	-0.593253	6.82e-09	1.61e-07	5.27937	5.37391	5.37016	4.70559	4.80182	4.7336
ADORA2A	0.66299	-0.592941	0.000131	0.000488	2.36998	2.25831	2.5501	1.97578	1.78897	1.64105
HYKK	0.663515	-0.591798	0.000156	0.000564	1.6477	1.91667	1.90228	1.23939	1.21959	1.23846
RASGRP2	0.663922	-0.590914	0.000154	0.000557	2.25831	2.19456	1.91679	1.53634	1.56229	1.49657
TRIM9	0.664025	-0.590691	1.93e-05	0.0001	2.96028	2.84998	3.15243	2.42363	2.33702	2.43199
CARD10	0.664085	-0.59056	2.76e-09	7.67e-08	5.84566	5.7454	5.73104	5.19327	5.16532	5.19197
PLEKHD1	0.664092	-0.590546	0.000894	0.00245437	1.20092	1.18725	1.10561	0.593481	0.782745	0.335707
TFAP2C	0.664712	-0.589198	1.28e-06	1.11e-05	3.48556	3.35514	3.42217	2.82901	2.74754	2.9215
ARTN	0.665126	-0.5883	2.44e-05	0.000122	2.90266	2.6593	2.84858	2.0972	2.22891	2.30716
TSPAN1	0.665415	-0.587674	0.000455	0.00138919	1.4831	1.80745	1.62243	0.958856	0.986711	1.21052
AC068587.4	0.665435	-0.587631	0.000744	0.00210071	1.29082	1.63085	1.33215	0.83986	0.941427	0.71112
ALKBH6	0.665693	-0.587072	1.03e-06	9.34e-06	3.70066	3.54654	3.53599	2.99149	2.96203	3.06802
LGMN	0.665759	-0.586928	1.57e-08	3.19e-07	5.45462	5.30229	5.34973	4.79233	4.74637	4.80723
FXYD6	0.665992	-0.586423	0.00164352	0.00414508	1.02401	1.0502	0.975849	0.746652	0.335707	0.227385
EFHD2	0.666263	-0.585835	3.34e-10	1.45e-08	7.31115	7.20995	7.23676	6.6664	6.64794	6.68588
NR4A3	0.666362	-0.585622	0.00112188	0.00298306	0.570865	0.620583	0.711389	0.14282	0.0455571	-0.0379647
SLC2A4	0.666606	-0.585095	0.000338	0.00108398	1.20092	1.17376	1.11918	0.593481	0.650175	0.491482
SMIM4	0.66674	-0.584804	4.31e-06	2.95e-05	2.67872	2.6176	2.70944	2.0972	2.08903	2.06395
NPHP3	0.666766	-0.584747	0.00247964	0.00590301	1.23514	0.97357	1.42534	0.663302	0.406957	0.81673
ITGB5	0.666815	-0.584641	2.92e-10	1.31e-08	6.10966	6.09653	6.08602	5.4857	5.51375	5.53797
MERTK	0.666817	-0.584636	0.000282	0.000929	1.78266	1.93174	1.66778	1.08159	1.36814	1.16731
PRRT1	0.666954	-0.584341	0.00853674	0.0170774	1.40657	0.895924	1.20417	1.03249	0.371317	0.370476
SMARCC2	0.667047	-0.58414	1.27e-10	6.85e-09	6.88675	6.83541	6.86033	6.25246	6.29304	6.28334
FBLN5	0.667141	-0.583936	9.61e-05	0.000379	1.88672	1.7031	1.84863	1.17936	1.27252	1.22591
BCL2L1	0.66762	-0.582901	1.27e-10	6.85e-09	7.46362	7.4355	7.48958	6.89039	6.84088	6.90956
SNX8	0.668006	-0.582066	9.17e-10	3.15e-08	5.63386	5.60105	5.62095	5.07288	5.01151	5.02702
GDF15	0.668202	-0.581643	1.15e-08	2.49e-07	6.77029	6.69567	6.68306	6.16982	6.03076	6.20622
MACC1	0.668691	-0.580589	4.43e-07	4.71e-06	4.12921	4.28541	4.24564	3.54955	3.72748	3.63499
AKAP6	0.668834	-0.580281	0.000966	0.00262484	1.16766	1.2672	1.10561	0.833016	0.570865	0.409593
EGR1	0.669105	-0.579695	8.57e-08	1.26e-06	8.71285	8.53637	8.48215	8.0349	7.91575	8.04269
SETD1B	0.669555	-0.578726	1.71e-07	2.19e-06	5.22924	5.26046	5.24686	4.57794	4.8185	4.59475
ZNF615	0.669679	-0.578458	0.000852	0.00235678	1.70013	1.55653	1.60393	1.17936	1.20894	0.730878
FNIP1	0.669719	-0.578373	2.79e-07	3.21e-06	4.30251	4.37251	4.23443	3.66619	3.82384	3.6778
PTGS2	0.670346	-0.577023	0.00103179	0.00277465	0.849507	0.660317	0.695108	0.174122	0.125784	0.173055
EFCC1	0.670867	-0.575902	0.000852	0.00235716	1.27939	1.2672	1.25561	0.593481	0.532944	0.952221
LRAT	0.670921	-0.575785	1.62e-05	8.69e-05	2.75259	3.00443	2.81663	2.32603	2.25384	2.27606
THNSL1	0.671389	-0.574778	6.66e-08	1.02e-06	4.1724	4.24895	4.22371	3.68633	3.6564	3.58043
NEBL	0.671559	-0.574413	1.04e-07	1.48e-06	4.71095	4.90189	4.84034	4.23246	4.26233	4.23619
MMRN2	0.671672	-0.57417	0.000892	0.00245112	1.97448	2.25238	2.37816	1.89613	1.5535	1.4555
GRHL1	0.672038	-0.573384	1.01e-05	5.84e-05	3.21467	3.33917	3.34445	2.59219	2.89234	2.67836
EFCAB10	0.672125	-0.573199	0.00422876	0.00933522	0.489696	0.502025	0.774028	0.275427	-0.0101522	-0.208108
AC027097.2	0.672192	-0.573054	0.00113007	0.00299933	0.85339	0.948281	0.782086	0.452323	0.183895	0.242673
GLIS2	0.672387	-0.572635	8.39e-08	1.24e-06	4.41775	4.32178	4.34331	3.86348	3.74038	3.76544
DYNLT1	0.672673	-0.572022	5.44e-10	2.1e-08	6.89661	6.87328	6.85384	6.30182	6.25118	6.35571
CDHR3	0.672706	-0.571952	0.00352757	0.00801687	0.741786	0.825959	0.801927	0.174122	0.532944	-0.0696396
ROGDI	0.672826	-0.571695	8.51e-06	5.08e-05	3.34367	3.26899	3.13777	2.77982	2.56258	2.70462
CSTA	0.672856	-0.571629	7.31e-05	0.000302	2.7598	2.58475	2.54288	2.13699	1.87541	2.173
C2orf88	0.672881	-0.571576	0.000147	0.000536	2.12038	1.9474	2.27154	1.50888	1.56229	1.54595
CFAP74	0.672939	-0.571453	0.00119126	0.00313999	0.995103	0.834413	0.975849	0.174122	0.489696	0.409593
AFAP1L1	0.673293	-0.570695	1.87e-06	1.5e-05	3.08842	3.14723	3.02506	2.48966	2.53464	2.5233
LRRC73	0.673638	-0.569954	0.00315905	0.00728482	0.172251	0.189675	0.172569	-0.356384	-0.541577	-0.268577
HACL1	0.673684	-0.569856	2.42e-07	2.88e-06	4.27621	4.20711	4.10399	3.64417	3.64417	3.58856
ATP2A1-AS1	0.673721	-0.569776	0.0096415	0.0189786	0.878205	0.330615	0.993817	0.0911345	0.298228	0.0830467
ALKBH2	0.674012	-0.569154	9.23e-09	2.08e-07	5.19534	5.15056	5.12097	4.64659	4.57317	4.542
NFE2L3	0.674026	-0.569123	4.15e-10	1.69e-08	6.15808	6.15678	6.13695	5.56434	5.61538	5.56321
FAM72D	0.674195	-0.568761	3.56e-07	3.91e-06	4.25075	4.36886	4.33512	3.76392	3.64749	3.84482
STARD13	0.674402	-0.568319	0.000551	0.00163215	1.84323	1.80745	1.82864	1.50888	1.28794	0.986711
MYBL1	0.674944	-0.56716	1.94e-06	1.54e-05	3.95928	4.13094	4.22371	3.5194	3.57212	3.52036
MRM3	0.674951	-0.567145	8.38e-10	2.94e-08	5.93823	5.92605	5.95307	5.41686	5.34387	5.35731
ARID5B	0.675071	-0.56689	6.46e-07	6.34e-06	4.44364	4.51763	4.58632	3.84414	4.07549	3.91725
SLC39A1	0.675172	-0.566673	2.24e-10	1.08e-08	6.79426	6.78756	6.73319	6.2096	6.19529	6.21045
DZIP1L	0.67518	-0.566656	0.000382	0.00119634	1.84943	1.80184	1.54838	1.10561	1.26532	1.12038
TNS2	0.675261	-0.566482	2.32e-06	1.79e-05	3.96771	3.76033	3.75044	3.31656	3.23183	3.23183
SYT12	0.675463	-0.566052	0.00023	0.000781	1.80836	1.82864	1.71873	1.12143	1.12748	1.41027
BSN	0.67579	-0.565352	0.00165724	0.00417251	0.976584	1.25428	1.00574	0.309165	0.650175	0.570929
ARHGEF25	0.675796	-0.56534	0.014343	0.0267003	0.0257531	0.487541	0.0959823	-0.313944	-0.0771319	-0.699144
NSL1	0.67633	-0.564201	2.01e-09	5.86e-08	5.70569	5.68494	5.73749	5.19534	5.12622	5.11591
NR6A1	0.67642	-0.564008	1.17e-05	6.65e-05	2.94901	3.00957	3.16527	2.46074	2.56258	2.40277
PER2	0.676669	-0.563478	1.9e-07	2.36e-06	4.47369	4.39298	4.39908	3.90195	3.92181	3.74901
AC005034.3	0.677088	-0.562585	0.000515	0.0015421	2.01103	1.95941	2.01288	1.71946	1.40691	1.18317
CTAGE4	0.677171	-0.562408	0.00267913	0.00630876	1.7949	2.42578	2.23969	1.6073	1.70062	1.47228
TCTEX1D2	0.677581	-0.561535	1.3e-05	7.21e-05	2.63643	2.6889	2.80399	2.21745	2.08903	2.14624
APBB2	0.677626	-0.561438	2.75e-08	5.05e-07	6.18009	6.34672	6.33773	5.7154	5.77146	5.6929
FMNL1	0.677817	-0.561031	0.000764	0.00214722	1.68142	1.52478	1.32263	0.833016	1.01508	0.986711
WDFY2	0.678029	-0.560582	6.58e-06	4.11e-05	3.44775	3.60369	3.5058	2.94759	3.09791	2.82377
LIPE-AS1	0.678062	-0.56051	0.00888249	0.0176525	0.422918	0.0894458	0.304973	-0.395113	0.0215631	-0.515537
KCNK13	0.678168	-0.560285	0.000544	0.00161605	2.16554	2.2917	2.13932	1.75921	1.34193	1.84185
HPCAL4	0.678284	-0.560039	1.22e-06	1.07e-05	3.65855	3.56936	3.53147	3.0268	2.9486	3.10738
CGREF1	0.678436	-0.559715	0.000347	0.00110579	1.51104	1.46426	1.69301	0.927961	1.07885	0.972926
TFR2	0.678676	-0.559204	5.26e-07	5.39e-06	3.84482	3.76489	3.73672	3.30156	3.16109	3.21249
FAM216A	0.67948	-0.557497	3.37e-07	3.75e-06	3.93755	3.8117	3.92944	3.31161	3.36692	3.32241
RSAD1	0.679576	-0.557293	2.15e-09	6.18e-08	5.61419	5.59023	5.56138	5.07062	5.0041	5.02127
BEND7	0.679863	-0.556685	3.17e-06	2.3e-05	3.22773	3.26372	3.29598	2.59219	2.81121	2.70199
IER5	0.680756	-0.554791	1.55e-09	4.74e-08	6.21458	6.13276	6.15651	5.60727	5.58461	5.6477
WIPI1	0.682229	-0.551672	3.35e-07	3.73e-06	3.95216	3.96773	3.8486	3.34851	3.4181	3.34367
P4HA2	0.682708	-0.55066	5.55e-08	8.88e-07	4.68748	4.7641	4.8278	4.22883	4.17744	4.22422
AC004687.2	0.682219	-0.551694	0.125504	0.176091	0.969441	-0.154262	1.01175	-0.0610507	0.714335	-0.540872
C1QTNF6	0.68321	-0.549599	6.18e-06	3.91e-05	2.88018	2.87985	2.88416	2.21987	2.38813	2.3779
HEYL	0.683288	-0.549434	4.62e-08	7.74e-07	4.2562	4.30113	4.33431	3.75823	3.74476	3.74149
ZNF232	0.683387	-0.549225	3.78e-06	2.65e-05	3.00393	2.93215	3.06909	2.45196	2.45196	2.45173
MTBP	0.683574	-0.548831	1.74e-08	3.48e-07	4.83255	4.83673	4.78315	4.23324	4.31748	4.25166
PROSER2	0.683792	-0.548371	6.39e-08	9.96e-07	5.23749	5.13881	5.11517	4.66804	4.53713	4.64542
MBNL1	0.683967	-0.548001	4.74e-10	1.89e-08	7.98109	8.04549	8.05023	7.48013	7.52059	7.43174
NEK3	0.684361	-0.54717	2.46e-07	2.92e-06	3.82346	3.75296	3.83943	3.25089	3.28092	3.23946
RUNX1	0.685375	-0.545034	3.81e-07	4.14e-06	4.87408	4.84829	5.01775	4.27242	4.42848	4.39692
AC034102.2	0.683865	-0.548216	0.174938	0.234082	0.164297	1.20811	-0.331709	0.424679	-0.941483	-0.00520277
AC013489.1	0.685791	-0.54416	0.00637945	0.0133223	0.901332	0.520474	0.377129	0.108903	-0.00156535	0.0585298
RADIL	0.686321	-0.543044	0.0166058	0.0303319	0.614081	0.377129	0.0773554	-0.433221	0.150157	-0.306297
BFSP1	0.686335	-0.543015	1.79e-06	1.45e-05	3.31161	3.23243	3.2485	2.74754	2.65562	2.76444
FOXD2-AS1	0.686439	-0.542796	0.0157351	0.0289565	1.30688	1.1257	1.58863	1.17936	0.313051	0.938865
HAPLN3	0.686645	-0.542363	2.93e-06	2.16e-05	3.22497	3.32958	3.21886	2.79095	2.65562	2.70957
CEMIP	0.687016	-0.541585	8.63e-05	0.000345	2.34026	2.52104	2.35216	2.01226	1.79867	1.7935
MRVI1	0.687126	-0.541354	0.0001	0.000392	2.93939	3.05232	3.05561	2.71807	2.27154	2.46119
MRPL44	0.687599	-0.540361	7.77e-10	2.78e-08	6.57671	6.53716	6.51664	6.03761	5.97486	5.99819
AC018521.5	0.687615	-0.540327	0.0204531	0.0363501	0.321979	0.114049	-0.116445	-0.851038	-0.325257	-0.148655
AL157935.2	0.687032	-0.541551	0.0782184	0.11679	0.788223	1.30476	0.846817	-0.45579	1.02181	0.691444
ACTL8	0.687702	-0.540144	0.00165227	0.00416424	1.42278	1.25428	1.19635	0.572292	0.976067	0.681865
HAS3	0.687822	-0.539893	1.92e-10	9.32e-09	7.92219	7.9297	7.93244	7.38421	7.43291	7.34678
MRPL2	0.6882	-0.5391	4.67e-09	1.18e-07	6.23398	6.14196	6.113	5.63523	5.62782	5.60815
ADGRB2	0.688233	-0.53903	7.57e-06	4.62e-05	2.81855	2.814	2.82894	2.18249	2.32704	2.32659
KHDRBS3	0.688584	-0.538294	5.15e-07	5.3e-06	3.80689	3.78789	3.88336	3.21467	3.32568	3.31656
COBL	0.688801	-0.537842	5.22e-07	5.35e-06	4.58318	4.46275	4.62751	4.07656	3.93196	4.05617
AC156455.1	0.68885	-0.537738	1.34e-05	7.39e-05	3.00778	2.88617	2.92126	2.51113	2.29279	2.40831
SYT3	0.688967	-0.537493	0.00113988	0.0030229	1.92615	1.50683	1.86279	1.20092	1.19478	1.27903
TSFM	0.689029	-0.537363	5.77e-09	1.4e-07	5.96429	5.90446	5.96164	5.35668	5.39029	5.46993
ARPC4	0.689419	-0.536547	6.57e-10	2.45e-08	7.34155	7.27911	7.26992	6.79604	6.72583	6.7602
GNB1	0.689548	-0.536276	3.52e-11	2.48e-09	8.60971	8.61427	8.58168	8.07061	8.07061	8.05564
TTC26	0.689742	-0.535871	2.02e-08	3.95e-07	4.608	4.58318	4.58267	4.08484	4.03168	4.0518
RAD54B	0.689931	-0.535477	5.21e-07	5.34e-06	5.34834	5.34723	5.23057	4.65185	4.89368	4.76541
WNK4	0.690168	-0.534981	0.0171265	0.0311345	0.741786	0.137628	0.628031	-0.266027	-0.0771319	0.227385
ILDR1	0.690603	-0.534071	0.00886098	0.0176125	0.321979	0.915009	0.532707	0.0911345	0.0455571	0.0434529
GAB2	0.691304	-0.532607	0.0058939	0.0124339	1.78266	1.17376	1.65701	0.851718	1.08949	1.0499
TLE6	0.691622	-0.531945	0.00209736	0.00512116	1.0502	0.825959	0.907764	0.366336	0.551958	0.256428
CDKN1A	0.692078	-0.530993	6.01e-10	2.28e-08	7.66212	7.66007	7.60911	7.12392	7.06401	7.15149
EN2	0.692978	-0.529119	0.0123341	0.0234841	0.878205	0.330615	0.424993	0.118424	0.125784	-0.208108
CPT1B	0.693187	-0.528683	0.0259252	0.0446621	0.699564	0.033907	0.477918	-0.50106	0.0630824	0.027408
BMP6	0.693254	-0.528543	4.3e-05	0.000195	2.48966	2.5057	2.42635	2.0403	1.82187	1.98732
WNT3A	0.693597	-0.52783	1.26e-05	7.04e-05	3.02049	3.05232	2.86975	2.48436	2.47355	2.40277
MFSD4A	0.693635	-0.527751	0.000177	0.000624	1.7424	1.6738	1.66778	1.13707	1.18317	1.17695
UQCRC2	0.6938	-0.527408	3.49e-10	1.5e-08	7.54285	7.56364	7.51432	7.05441	6.99089	6.99457
KLF11	0.694304	-0.526361	2.56e-07	3.02e-06	4.09329	4.16477	4.07348	3.64417	3.5424	3.57224
FAM72A	0.694454	-0.526049	2.53e-06	1.93e-05	4.41339	4.40467	4.53715	3.76736	4.00415	3.99438
TIPARP	0.694519	-0.525913	5.34e-08	8.65e-07	5.65178	5.726	5.81892	5.25128	5.20023	5.16954
WDR11	0.694645	-0.525651	1.77e-08	3.55e-07	4.98745	5.06869	5.05946	4.52427	4.53135	4.48356
SH2D3A	0.69466	-0.525622	2.08e-07	2.56e-06	5.04684	4.89779	4.99934	4.52222	4.38163	4.46721
ADIRF-AS1	0.694767	-0.5254	0.000106	0.000408	2.22063	2.17011	2.04564	1.59917	1.69301	1.56204
PIFO	0.695341	-0.524207	0.004904	0.0105961	0.387269	0.730468	0.628031	0.0911345	-0.0771319	0.173055
ANKRD18A	0.695398	-0.52409	0.000159	0.000573	2.25961	2.20138	2.44626	1.86614	1.7949	1.6752
BCL9L	0.695992	-0.522858	4.68e-10	1.88e-08	7.57517	7.50066	7.54942	6.99164	7.04173	7.022
MED12L	0.695996	-0.522849	6.08e-05	0.000259	2.31243	2.46594	2.3579	1.77015	1.93439	1.85723
SLC22A18AS	0.696081	-0.522672	0.000755	0.00212682	1.6477	1.46426	1.36814	0.970115	1.02929	0.906434
GAA	0.696508	-0.521788	6.24e-09	1.5e-07	6.57831	6.47317	6.45829	5.99967	5.95511	5.99
ABCC6	0.696639	-0.521517	0.0178133	0.0322252	0.0435938	-0.295298	0.213646	-0.461295	-0.750681	-0.384313
SLC20A1	0.69667	-0.521454	1.17e-09	3.78e-08	7.36934	7.47946	7.44124	6.90186	6.90835	6.91592
MRPS22	0.696702	-0.521386	3.75e-10	1.58e-08	6.96022	6.96367	6.9692	6.47905	6.41817	6.43299
WBP4	0.697114	-0.520533	2.19e-08	4.23e-07	5.22924	5.25742	5.33877	4.73122	4.74637	4.78588
AC024940.2	0.697341	-0.520064	0.00206908	0.00506444	1.12564	1.16485	0.985073	0.355794	0.654162	0.69312
CASP10	0.697376	-0.519992	0.00191398	0.00472744	0.813426	1.10561	1.02051	0.488307	0.425283	0.474182
MYORG	0.69744	-0.519859	1.2e-06	1.05e-05	4.4754	4.48532	4.5756	3.935	4.12634	3.90615
STK33	0.697467	-0.519803	6.27e-06	3.95e-05	2.90515	3.02068	2.97546	2.41579	2.45196	2.47449
AL080276.2	0.698059	-0.518578	0.0136685	0.0256462	0.108285	0.52695	-0.0247874	-0.257356	-0.331994	-0.344742
NRARP	0.698097	-0.5185	4.83e-07	5.01e-06	4.39483	4.3062	4.31086	3.86685	3.72026	3.87522
UGCG	0.698129	-0.518434	5.15e-09	1.27e-07	5.92686	5.99412	5.98005	5.40886	5.49671	5.43795
DIRAS3	0.698279	-0.518124	0.00215194	0.00523383	0.911205	1.15454	1.19635	0.433137	0.616445	0.653813
LIN7A	0.698477	-0.517715	0.000133	0.000493	1.97635	2.12876	2.15313	1.51861	1.61837	1.5655
MAP3K15	0.698517	-0.517633	0.00419029	0.00926601	1.77681	1.54097	1.26501	1.02637	0.834001	1.17695
CSRNP1	0.698629	-0.517401	2.29e-07	2.76e-06	4.70571	4.64338	4.61294	4.15728	4.04777	4.20925
NIPAL1	0.698657	-0.517343	1.01e-05	5.84e-05	3.99212	4.16477	4.22133	3.52439	3.74038	3.55272
ARHGEF1	0.698786	-0.517077	9.45e-09	2.12e-07	6.82259	6.68017	6.71135	6.21911	6.20463	6.23849
RAB6B	0.699039	-0.516555	7.55e-06	4.61e-05	3.24532	3.14181	3.23993	2.61108	2.66562	2.79605
AC146944.4	0.699442	-0.515723	9.28e-05	0.000367	2.89199	2.92814	2.99229	2.63254	2.41397	2.23052
GLI1	0.699853	-0.514876	0.00554372	0.0117944	1.38992	1.22035	1.3149	1.19707	0.616445	0.591134
DDB2	0.700193	-0.514175	3.93e-07	4.25e-06	5.52059	5.34621	5.31811	4.89454	4.83392	4.91447
FUT1	0.700399	-0.513751	1.14e-06	1.01e-05	3.57672	3.52765	3.51203	3.08795	3.00384	2.98706
DGKE	0.700898	-0.512724	2.43e-05	0.000121	3.12489	3.26372	3.21247	2.85851	2.6144	2.60603
VASN	0.701491	-0.511503	2.13e-05	0.000108	2.7828	2.62748	2.75723	2.20682	2.22063	2.20126
ITPKA	0.701504	-0.511478	3.79e-06	2.66e-05	3.24934	3.1747	3.23411	2.78481	2.66562	2.67836
AC026401.3	0.701563	-0.511356	8.29e-05	0.000335	2.53539	2.64427	2.44987	2.12793	2.05692	1.91679
PRR15	0.70185	-0.510766	0.000527	0.00157318	1.30688	1.34332	1.3579	0.810035	0.803018	0.86389
SACS	0.701942	-0.510576	5.99e-08	9.42e-07	7.12925	7.23608	7.29881	6.65266	6.78076	6.69683
CDCA4	0.702061	-0.510331	8.59e-10	2.98e-08	6.98905	6.96307	6.91527	6.45776	6.42572	6.4535
TNPO2	0.702145	-0.51016	3.87e-10	1.61e-08	6.6597	6.67105	6.6538	6.15992	6.14365	6.15097
OLMALINC	0.702158	-0.510133	1.66e-06	1.36e-05	3.5094	3.62713	3.57196	3.10738	3.06489	3.00998
LINC00174	0.7023	-0.50984	0.00506453	0.0108959	0.281771	0.342383	0.493766	-0.0188352	-0.208108	-0.176047
TOB1	0.70254	-0.509348	9.76e-10	3.31e-08	6.23576	6.24191	6.21486	5.72591	5.73685	5.70146
F12	0.702673	-0.509074	9.25e-07	8.5e-06	4.67521	4.53994	4.57085	4.12002	3.97891	4.16477
CLIP4	0.702835	-0.508742	2.85e-06	2.11e-05	3.43905	3.5525	3.4702	3.03043	3.0071	2.90108
COL16A1	0.702913	-0.508583	0.0059081	0.0124598	0.849507	0.730468	1.10561	0.275427	0.270364	0.61217
AC129492.1	0.703139	-0.508117	5.53e-08	8.88e-07	6.21879	6.07443	6.12182	5.67394	5.65589	5.56014
TACO1	0.703321	-0.507744	2.8e-08	5.12e-07	6.35338	6.26082	6.27496	5.7753	5.72392	5.86754
PNPT1	0.703687	-0.506995	1.28e-08	2.71e-07	6.16272	6.18369	6.14935	5.67237	5.72198	5.57907
LRRC49	0.704069	-0.506211	6.51e-06	4.08e-05	3.33981	3.49357	3.48833	2.99377	2.9569	2.85662
MCC	0.70421	-0.505922	1.12e-08	2.44e-07	5.48362	5.4851	5.51458	4.92766	5.02052	5.01416
DHRS4-AS1	0.704232	-0.505877	8.09e-08	1.2e-06	4.31616	4.36538	4.35933	3.86685	3.83399	3.82459
AOC2	0.70435	-0.505637	4.83e-05	0.000215	2.42462	2.34709	2.49564	1.94957	1.89322	1.9088
C9orf3	0.704641	-0.50504	2.57e-07	3.02e-06	4.06334	3.98872	3.99513	3.51392	3.49754	3.52036
NDUFAF1	0.704739	-0.504838	1.05e-07	1.48e-06	4.47097	4.45396	4.40612	3.91289	3.98652	3.91351
RNF207	0.704821	-0.504672	0.00570728	0.012095	1.13276	0.76259	0.957201	0.275427	0.385294	0.666959
SLC43A2	0.704967	-0.504372	1.22e-06	1.07e-05	4.37567	4.19172	4.2547	3.82907	3.75296	3.72767
LRP2BP	1.43586	0.521914	0.0433423	0.0697342	-0.654134	-0.699144	-0.0877385	0.033907	0.425283	-0.356384
RAB31	0.704996	-0.504313	8.45e-09	1.93e-07	5.93202	6.02884	5.95363	5.49993	5.46268	5.44086
RPS27L	0.705084	-0.504133	2.55e-07	3.01e-06	5.72523	5.88705	5.88595	5.31906	5.268	5.40194
IER2	0.706159	-0.501936	7.26e-09	1.7e-07	8.01998	7.92804	7.91235	7.49119	7.38808	7.47643
HMMR	0.706467	-0.501306	4.41e-09	1.14e-07	6.54377	6.53863	6.58001	6.023	6.11671	6.01646
CLCF1	0.706617	-0.501	0.000144	0.000528	2.07255	2.03212	2.10983	1.65701	1.47389	1.58959
MRPL39	0.706928	-0.500365	1.14e-08	2.46e-07	5.81302	5.73494	5.82832	5.30515	5.25872	5.31205
MRPL58	0.707004	-0.500211	4.27e-08	7.28e-07	6.14061	6.04311	6.07343	5.64435	5.50278	5.61282
SP6	0.707075	-0.500065	1.59e-07	2.07e-06	4.37495	4.33006	4.31868	3.87065	3.78575	3.87065
CBR3	0.707314	-0.499577	0.00939987	0.018559	0.0525123	0.0894458	0.334434	-0.395113	-0.417749	-0.208108
AC006213.1	0.707686	-0.498818	0.00375915	0.00846905	0.650175	0.660317	0.614081	-0.0379647	0.227385	0.227385
TAP1	0.707728	-0.498733	1.6e-08	3.26e-07	5.46422	5.43312	5.48011	4.97405	4.9045	5.00485
SERPINA1	0.707728	-0.498733	0.0134619	0.0253095	0.741786	0.513784	0.172569	-0.0726825	0.0773554	-0.082154
IGF2BP1	0.708058	-0.49806	0.0227626	0.0399049	0.119264	-0.0270837	0.172569	-0.433221	-0.0520824	-0.764874
TUBE1	0.708236	-0.497698	1.53e-06	1.28e-05	3.83773	3.88214	3.94116	3.38034	3.31665	3.47523
SLC1A3	0.708534	-0.49709	5e-08	8.25e-07	4.70064	4.71853	4.70271	4.19378	4.26071	4.17325
BCOR	0.70854	-0.497078	8.99e-07	8.3e-06	4.73751	4.85058	4.80361	4.21358	4.41932	4.25996
PLCD1	0.708904	-0.496337	4.85e-05	0.000215	3.04053	3.02506	2.84858	2.58623	2.46384	2.38197
FAM111B	0.708912	-0.496321	1.76e-07	2.24e-06	4.54546	4.59385	4.5617	4.03979	4.02162	4.15255
ANKRD22	0.709086	-0.495968	0.0225307	0.0395669	0.741786	0.114049	0.25473	0.033907	-0.109631	-0.306297
MUC3A	0.709106	-0.495927	4.89e-07	5.06e-06	4.01185	4.019	4.04719	3.58167	3.55513	3.45442
FAM72B	0.709473	-0.495181	2.2e-05	0.000111	3.60039	3.52042	3.60974	2.93668	3.04471	3.25709
LCA5	0.709494	-0.495137	0.000277	0.000916	1.85723	1.93174	1.8375	1.26809	1.44606	1.41951
SMCO4	0.709842	-0.494429	2.56e-06	1.94e-05	3.7098	3.67322	3.70066	3.13105	3.15417	3.31388
PSMB9	0.709955	-0.494201	0.00857381	0.017141	0.761091	0.86389	0.757705	0.033907	0.227385	0.63355
UBE3A	0.710068	-0.49397	1.41e-09	4.41e-08	7.33166	7.40888	7.40888	6.87397	6.91493	6.87818
MRPS23	0.71074	-0.492607	3.92e-10	1.62e-08	7.53291	7.51597	7.49051	7.02048	6.99912	7.04232
BOLA3	0.710787	-0.492511	7.34e-08	1.11e-06	5.29255	5.26549	5.19	4.75363	4.70372	4.81507
MRPS18B	0.710791	-0.492504	1.86e-09	5.5e-08	7.03028	6.96733	6.98998	6.54611	6.47415	6.49091
PIK3R5	0.710996	-0.492087	0.0151643	0.028055	0.458233	0.303749	0.34736	0.225234	-0.417749	-0.148655
ALAS1	0.711249	-0.491574	5.78e-09	1.41e-07	6.616	6.5282	6.50857	6.07229	6.05292	6.05268
TBC1D31	0.711265	-0.491541	8.9e-08	1.29e-06	4.41775	4.40395	4.37919	3.88294	3.93463	3.90615
ASAP2	0.711272	-0.491526	7.89e-07	7.46e-06	4.1951	4.1791	4.32833	3.75823	3.75533	3.71375
VWA5A	0.711484	-0.491098	0.00178757	0.00445789	1.6209	2.03212	1.79889	1.38371	1.3919	1.21052
AP001505.1	0.711809	-0.490437	1.36e-05	7.47e-05	2.83223	2.93215	2.93294	2.41579	2.44106	2.36931
PLEKHA6	0.711992	-0.490067	1.98e-06	1.57e-05	3.77546	3.91253	3.85974	3.30156	3.42237	3.34952
ANG	0.712079	-0.489891	0.00215853	0.00524692	1.65464	1.71444	1.48591	1.36938	0.940848	1.09884
C3orf80	0.712535	-0.488968	8.79e-05	0.000351	2.54081	2.68273	2.74754	2.12793	2.26454	2.10574
TERT	0.712537	-0.488964	0.0057806	0.0122226	1.2645	1.64328	1.48291	1.23939	0.730673	0.986711
MYOF	0.713053	-0.487919	6.25e-09	1.5e-07	7.98764	7.98349	8.00635	7.45639	7.59033	7.46501
DCP1A	0.713202	-0.487618	6.75e-09	1.6e-07	5.8626	5.93759	5.92045	5.40194	5.44537	5.40973
MTM1	0.713448	-0.48712	4.12e-05	0.000188	3.34367	3.5211	3.53599	3.03756	3.07391	2.82801
TMEM121	0.713489	-0.487037	6.27e-05	0.000265	2.90515	2.71996	2.70709	2.30716	2.22063	2.34524
ITGA1	0.713732	-0.486546	0.00434452	0.00955516	1.07349	0.85339	1.12898	0.402388	0.714827	0.459157
ISYNA1	0.713734	-0.486543	2.9e-08	5.27e-07	7.14794	7.02814	6.9878	6.57651	6.54227	6.58557
PSMG4	0.713866	-0.486275	1.8e-06	1.46e-05	3.70417	3.78467	3.70403	3.29772	3.17457	3.26999
CDK11B	0.714127	-0.485747	4.03e-09	1.05e-07	6.63867	6.61981	6.661	6.09483	6.18177	6.18358
CCDC28B	0.714208	-0.485585	0.000303	0.000986	2.21902	2.28669	2.12637	1.63063	1.65867	1.88745
CMTM7	0.714293	-0.485413	2.03e-08	3.95e-07	5.36575	5.31436	5.33239	4.88713	4.8053	4.86624
ARHGEF28	0.71434	-0.485317	9.65e-06	5.63e-05	2.95318	2.94255	2.91373	2.50307	2.41201	2.44352
RAMP1	0.714405	-0.485186	5.08e-05	0.000224	3.64205	3.3801	3.39449	3.0801	2.94627	2.93754
COQ3	0.714778	-0.484433	1.01e-07	1.44e-06	4.65695	4.61745	4.58975	4.14307	4.1724	4.09348
DACT3	0.714781	-0.484427	0.000109	0.000418	2.34026	2.29554	2.1913	1.74486	1.82187	1.8024
IL18	0.714912	-0.484163	1.21e-06	1.06e-05	5.04684	4.93801	4.88218	4.57927	4.41365	4.42723
ARPIN	0.715212	-0.483557	3.17e-06	2.3e-05	3.55341	3.63289	3.64133	3.06951	3.20723	3.09378
CD82	0.715245	-0.48349	3.99e-06	2.76e-05	3.22773	3.20729	3.19079	2.76704	2.72145	2.6889
CHRNB4	0.715647	-0.48268	0.00607851	0.0127757	0.650175	0.69817	0.975849	0.25235	0.198956	0.427822
TGFBR3L	0.715743	-0.482487	5.86e-05	0.000251	2.73333	2.6593	2.57808	2.25977	2.0988	2.173
PLCG2	0.715754	-0.482465	3.57e-08	6.3e-07	5.0736	5.13506	5.08912	4.64542	4.63362	4.57245
PKP2	0.715791	-0.482389	2.31e-07	2.77e-06	5.45281	5.50707	5.47076	4.87946	5.07658	5.02127
AC093010.3	0.715926	-0.482117	1.3e-05	7.23e-05	5.02849	5.24016	5.35843	4.74277	4.67903	4.76351
CDKN2D	0.716539	-0.480882	3.48e-05	0.000164	3.48262	3.29868	3.33981	3.01785	2.77493	2.89617
ALS2CL	0.716658	-0.480642	0.000597	0.00174391	1.82063	2.07294	1.92943	1.41951	1.56229	1.39661
P2RY2	0.716904	-0.480148	0.000129	0.000482	2.72516	2.53933	2.52846	2.16242	2.17312	2.01226
CEP135	0.716915	-0.480126	3.37e-07	3.75e-06	4.45199	4.54086	4.49805	3.96773	4.08608	3.99249
CLMN	0.717086	-0.479783	2.24e-07	2.71e-06	4.27802	4.29969	4.25133	3.78356	3.84188	3.76177
FOXD4	0.717545	-0.478858	0.00067	0.00192502	1.68142	1.73987	1.90805	1.35449	1.32014	1.21991
WDR92	0.71791	-0.478125	7.25e-06	4.47e-05	4.19933	3.97109	4.02204	3.55413	3.56067	3.63969
ULK4	0.717932	-0.478081	0.00406507	0.00904127	1.0963	1.14157	1.21959	0.810035	0.803018	0.409593
MTERF3	0.717962	-0.478022	1.36e-08	2.83e-07	5.93269	5.87669	5.9154	5.48772	5.41172	5.39302
METTL27	0.718123	-0.477698	0.000294	0.000961	2.25831	2.12876	2.21961	1.7145	1.59835	1.86521
CCDC88B	0.718156	-0.47763	5.39e-05	0.000234	2.58864	2.60099	2.53737	2.13699	2.1578	1.99792
FOXP1	0.718291	-0.477359	0.00202745	0.00497564	1.11203	1.32072	1.30977	0.783458	0.859405	0.666959
VPS54	0.71854	-0.47686	2.75e-07	3.19e-06	5.59556	5.76449	5.73803	5.22895	5.26685	5.17189
SOX13	0.719158	-0.47562	1.13e-07	1.58e-06	4.71394	4.69951	4.66804	4.15728	4.24201	4.25166
CCDC15	0.719392	-0.47515	0.00109634	0.0029247	2.14564	2.21201	2.20632	1.99151	1.65867	1.50683
AC015712.2	0.719399	-0.475136	0.00405137	0.00902005	0.939701	0.730468	1.03249	0.463302	0.385294	0.427822
ZBED5-AS1	0.719522	-0.474889	0.00023	0.000781	2.31243	2.19456	2.13932	1.72496	1.82924	1.65905
GABRQ	0.719574	-0.474784	2.87e-07	3.3e-06	4.38163	4.42356	4.37056	3.93965	3.95928	3.85198
TIGD1	0.719865	-0.474202	0.00281526	0.00659356	1.45265	1.66263	1.43098	1.06575	1.21959	0.834001
PMPCB	0.720583	-0.472764	1.99e-09	5.83e-08	6.31584	6.31231	6.29229	5.85427	5.81778	5.83106
RPGR	0.72061	-0.472709	3.46e-06	2.47e-05	3.58336	3.51563	3.5146	2.98842	3.0853	3.11556
CHKA	0.720857	-0.472214	8.58e-08	1.26e-06	5.91223	5.85095	5.76361	5.41343	5.35322	5.34496
MIR600HG	0.721072	-0.471786	0.000773	0.00216823	1.59037	1.69852	1.68936	1.32225	1.1439	1.10751
DLL1	0.721313	-0.471302	0.0010533	0.00281969	1.56934	1.65588	1.52119	1.13707	1.21959	0.972926
CNTNAP3B	0.721906	-0.470117	5.19e-06	3.41e-05	3.59508	3.77598	3.66723	3.22175	3.2195	3.18996
SCUBE1	0.721979	-0.469971	0.000495	0.00149003	1.77681	1.80184	1.65701	1.23939	1.2941	1.29051
IFT122	0.722012	-0.469905	1.05e-06	9.45e-06	4.04746	4.029	3.9586	3.48481	3.59285	3.54213
ELFN2	0.722112	-0.469705	5.63e-09	1.38e-07	6.1454	6.15097	6.10365	5.67483	5.68798	5.62777
CENPH	0.722331	-0.469267	1.17e-06	1.03e-05	4.29335	4.22346	4.21002	3.85112	3.6907	3.78398
RAB24	0.722381	-0.469168	0.000322	0.001038	2.18835	2.20632	2.21367	1.91667	1.64035	1.65905
LTBP2	0.722748	-0.468436	0.00351509	0.00799268	1.22993	1.3074	1.02051	0.593481	0.834001	0.715733
AC135977.1	0.722945	-0.468042	0.0074762	0.0152676	1.13707	1.34193	1.52591	0.657432	1.10922	0.814417
HSPA2	0.723219	-0.467496	0.000463	0.00140918	2.46596	2.35383	2.35216	2.14489	1.83688	1.8024
WNT11	0.723236	-0.467462	0.0244868	0.0425271	0.422918	0.0894458	0.276133	-0.00725352	-0.0520824	-0.559924
RPS27AP16	0.723412	-0.467112	5.53e-06	3.57e-05	4.50499	4.542	4.57317	4.11745	3.91897	4.1923
IL20RA	0.723615	-0.466705	0.00395447	0.00884055	1.24018	1.45	1.41876	1.13707	0.885415	0.701553
SLC7A8	0.723636	-0.466663	2.18e-05	0.00011	3.54855	3.72052	3.52253	3.04323	3.13467	3.21249
VIPR1	0.723871	-0.466196	0.000557	0.00164807	2.47284	2.407	2.14624	1.85717	1.90228	1.86521
ABTB2	0.723879	-0.46618	1.65e-05	8.79e-05	4.00913	3.79565	3.83014	3.31982	3.48262	3.42217
CBFB	0.72391	-0.466119	1.8e-09	5.36e-08	7.15549	7.20417	7.14908	6.69893	6.73206	6.67899
RNASEK-C17orf49	0.72344	-0.467054	0.0977558	0.142102	0.310423	0.177133	-0.295298	-0.108774	-0.0296344	-1.07748
FRMD4B	0.72425	-0.465441	0.00068	0.00194801	1.83688	1.79572	1.95155	1.38371	1.28794	1.52062
LINC00839	0.724523	-0.464896	0.000354	0.00112408	2.67316	3.00443	2.96815	2.47734	2.34433	2.44352
PLCXD2	0.725244	-0.463461	4.27e-05	0.000194	3.02049	3.11048	3.23993	2.60723	2.71686	2.65124
ICAM1	0.725304	-0.463343	5.5e-08	8.84e-07	4.77499	4.78801	4.81314	4.32394	4.31377	4.34901
NOVA2	0.725592	-0.462769	0.000109	0.00042	2.6074	2.53048	2.5725	2.23489	2.09509	1.99792
MBOAT1	0.725638	-0.462678	0.000689	0.00196939	2.09775	2.15268	2.13241	1.83688	1.70434	1.46073
ERVMER34-1	0.725871	-0.462215	4.04e-08	6.95e-07	5.70473	5.68201	5.69855	5.23029	5.29834	5.16733
TMEM99	0.726063	-0.461834	1.52e-06	1.27e-05	4.40775	4.30251	4.33285	3.95042	3.7941	3.919
SNHG10	0.726241	-0.46148	3.44e-05	0.000162	2.74754	2.73562	2.66171	2.28669	2.21538	2.26263
TAF1	0.726262	-0.461438	2.35e-07	2.82e-06	5.29393	5.40669	5.43381	4.87674	4.96784	4.9034
CNTNAP3	0.7264	-0.461163	9.32e-05	0.000369	2.99723	3.13022	3.08735	2.43101	2.70666	2.68091
AC113935.1	0.726606	-0.460755	0.007543	0.0153703	1.62746	2.06046	1.67308	1.34573	1.10751	1.54894
PITPNA-AS1	0.72679	-0.46039	0.000106	0.00041	2.38172	2.29554	2.38237	1.89322	1.84855	1.93753
TGFB1I1	0.726809	-0.460352	0.000292	0.000957	2.43978	2.23052	2.3579	1.82664	1.82924	1.98732
ENTPD7	0.727011	-0.459951	1.3e-06	1.12e-05	5.65918	5.81492	5.73375	5.30389	5.36101	5.16245
SEMA7A	0.727317	-0.459343	2.07e-06	1.62e-05	4.20711	4.03979	4.09387	3.6622	3.65684	3.64133
CRY2	0.727407	-0.459165	1.27e-05	7.1e-05	3.8117	3.63802	3.63949	3.21918	3.30491	3.17992
ARRB2	0.727572	-0.458839	2.42e-08	4.6e-07	5.88503	5.83329	5.88678	5.46811	5.38645	5.37594
RGCC	0.727708	-0.458569	0.00430396	0.00948035	1.29082	1.20194	1.18112	0.98447	0.551958	0.781512
NSUN2	0.727806	-0.458375	9.45e-10	3.22e-08	7.72824	7.7445	7.77566	7.27341	7.32006	7.27911
LRRC75B	1.39602	0.481318	0.0306741	0.0516949	-0.34859	-0.162064	-0.882825	0.0911345	-0.109631	0.0830467
AC015813.1	0.728249	-0.457497	0.000245	0.000825	3.60105	3.86085	3.97414	3.25863	3.46489	3.33276
D2HGDH	0.728353	-0.457291	1.19e-05	6.74e-05	3.66217	3.55653	3.4608	3.1189	3.11386	3.07355
AL928654.4	0.728527	-0.456945	0.00494986	0.010688	1.51104	1.68311	1.98081	1.41951	1.21959	1.17695
FOXC1	0.728724	-0.456555	3.49e-07	3.85e-06	5.59733	5.57147	5.46602	5.0885	5.02052	5.1586
ABCG4	0.727744	-0.458496	0.0534014	0.0837667	0.14634	-0.143806	0.401376	-0.00725352	-0.199252	-0.764874
RAPGEFL1	0.729151	-0.455711	0.000136	0.000504	2.54081	2.52104	2.49564	1.94136	2.05692	2.18591
TMEM267	0.72924	-0.455534	4.55e-06	3.08e-05	3.46483	3.50199	3.52029	3.0957	3.05502	2.97219
DNASE1	0.72928	-0.455456	0.00250562	0.00595182	1.73677	1.63533	1.86511	1.34332	1.07885	1.46073
FCHO1	0.729429	-0.455161	3.05e-06	2.23e-05	5.22141	5.01469	5.07583	4.72303	4.57317	4.65372
CRYM	0.729881	-0.454267	0.000299	0.000976	2.30552	2.31696	2.2429	1.77743	1.74137	1.98732
GUSBP11	0.729893	-0.454244	0.000649	0.0018714	1.77015	1.71316	1.78837	1.41126	1.26061	1.24327
NUP85	0.730225	-0.453586	2.18e-09	6.25e-08	6.70888	6.68927	6.66941	6.25507	6.22116	6.23117
DLL4	0.730333	-0.453373	0.015081	0.0279185	0.458233	0.419554	0.590485	0.0616386	0.270364	-0.235693
AL136454.1	0.730378	-0.453285	0.00405273	0.00902152	0.854777	0.814417	0.76259	0.351193	0.280812	0.443148
ZNF488	0.730614	-0.452819	3.99e-05	0.000183	3.15229	3.03277	3.23411	2.67332	2.64505	2.74144
PFDN4	0.73067	-0.452709	8.81e-06	5.23e-05	5.10471	5.30736	5.34265	4.71825	4.78836	4.88969
DHODH	0.730862	-0.45233	6.14e-07	6.09e-06	4.51006	4.57967	4.50402	4.00026	4.11259	4.12018
RECQL4	0.730887	-0.452281	8.96e-09	2.02e-07	7.11409	7.01446	7.0434	6.60205	6.57898	6.634
POLH	0.730899	-0.452255	1.2e-06	1.05e-05	4.80563	4.79527	4.72671	4.30923	4.42394	4.23246
BMP7	0.730916	-0.452222	1.13e-05	6.47e-05	3.60294	3.70444	3.54477	3.25089	3.12242	3.13111
FAM43A	0.731345	-0.451377	0.000218	0.000744	2.43978	2.42313	2.29411	1.8643	1.90228	2.03499
SERPINB5	0.731454	-0.45116	1.16e-07	1.62e-06	5.53111	5.55544	5.50077	5.1547	5.00937	5.07503
AXIN2	0.731608	-0.450856	8.49e-07	7.92e-06	4.02095	4.09726	4.0177	3.60105	3.57672	3.60823
CLASRP	0.731732	-0.450612	6e-07	6e-06	4.47097	4.35793	4.37269	3.96189	3.92795	3.95993
HERC6	0.731952	-0.45018	5.86e-05	0.000251	3.42177	3.48261	3.229	2.87187	2.96815	2.93939
UTP4	0.732056	-0.449973	6.17e-10	2.32e-08	7.73504	7.69538	7.72003	7.26113	7.27083	7.26821
IL12A	0.732297	-0.449499	0.00249729	0.00593961	1.0963	1.11835	1.24079	0.70968	0.760812	0.63355
SPTB	0.732425	-0.449247	0.000312	0.00101179	2.56505	2.5928	2.79346	2.33287	2.1578	2.12233
ANKRD33B	0.732555	-0.44899	9.81e-06	5.71e-05	4.37366	4.45199	4.41728	3.9479	4.11049	3.83069
PDHX	0.732627	-0.448849	1.3e-08	2.74e-07	5.82545	5.87092	5.82272	5.4214	5.37016	5.38304
CITED2	0.732725	-0.448656	2.01e-07	2.48e-06	5.23331	5.17431	5.1586	4.79233	4.66723	4.76487
CDK11A	0.732824	-0.448462	5.53e-07	5.61e-06	5.21067	5.10471	5.14212	4.66853	4.79265	4.64473
ESF1	0.733113	-0.447893	2.99e-06	2.19e-05	6.00645	6.24006	6.22769	5.65941	5.74677	5.72362
AC004889.1	0.733114	-0.447891	0.000132	0.000491	3.16467	3.20434	3.43305	2.88979	2.84131	2.72937
GK5	0.733218	-0.447685	2.67e-06	2e-05	4.58926	4.74258	4.6367	4.21139	4.28885	4.12363
USP2-AS1	0.733305	-0.447515	0.00211682	0.00516255	1.71316	1.55653	1.56229	0.970115	1.2331	1.27045
SNRPEP4	0.733693	-0.446751	0.00405646	0.0090283	1.71667	1.89379	1.76768	1.54097	1.45	1.05377
PLD1	0.733741	-0.446657	0.000163	0.000582	2.71933	2.68273	2.65864	2.40509	2.2037	2.12233
STYXL1	0.733814	-0.446514	2.13e-07	2.6e-06	5.04092	4.94612	4.99214	4.60449	4.51517	4.52232
ZNF485	0.733852	-0.446438	0.000205	0.000706	2.52061	2.54567	2.66691	2.15424	2.22891	2.00562
CCDC51	0.734217	-0.445721	1.7e-08	3.42e-07	5.40661	5.39302	5.39902	4.96402	4.96002	4.93739
MDN1	0.734344	-0.445472	8.76e-07	8.14e-06	7.11649	7.17147	7.24206	6.6538	6.85795	6.67778
HBEGF	0.734514	-0.445139	8.92e-06	5.28e-05	3.24934	3.23243	3.28789	2.77514	2.79414	2.86371
GIN1	0.734577	-0.445015	1e-05	5.82e-05	3.49219	3.61289	3.56043	3.02205	3.15417	3.14937
PIM1	0.734682	-0.444808	1.24e-06	1.08e-05	4.34328	4.28541	4.22371	3.89611	3.81803	3.80676
TAF1A	0.734708	-0.444757	3.66e-07	4e-06	4.61625	4.51643	4.55713	4.1057	4.09834	4.15056
UBA2	0.73471	-0.444753	1.75e-09	5.26e-08	7.6674	7.70961	7.68795	7.21117	7.24206	7.27722
CCDC103	0.734485	-0.445195	0.397329	0.472379	1.25166	-0.624821	0.993817	-1.2008	0.721053	0.646119
GATB	0.73501	-0.444164	4.78e-08	7.95e-07	5.44385	5.38271	5.45913	4.97819	4.96078	5.01416
IFT74	0.735019	-0.444146	1.79e-06	1.45e-05	3.8472	3.95042	3.93445	3.45487	3.48262	3.4623
TGFA	0.735058	-0.444069	2.04e-08	3.96e-07	5.87175	5.92045	5.94614	5.43629	5.47592	5.49312
FAM72C	0.735184	-0.443824	0.00479005	0.0103947	3.17416	3.13514	3.18084	2.9054	2.95962	2.28691
ARHGEF26	0.735316	-0.443563	1.89e-06	1.51e-05	4.11049	4.26	4.22701	3.74484	3.75822	3.76544
CEBPA-DT	0.735672	-0.442866	0.00795939	0.0160979	0.761091	1.08058	0.774028	0.488307	0.358967	0.452323
PRIMPOL	0.736152	-0.441925	0.000361	0.00114147	2.4452	2.69665	2.71686	2.13699	2.21039	2.18591
ELOA-AS1	0.736236	-0.441759	0.0253487	0.0437963	0.321979	0.564759	0.401376	0.25235	0.0773554	-0.356384
GBX2	0.736257	-0.441719	0.000948	0.00258186	2.29345	2.30504	2.29411	1.7849	2.08038	1.68459
FZD5	0.736258	-0.441717	1.37e-06	1.17e-05	4.74957	4.92025	4.89225	4.40275	4.45212	4.38192
ARSK	0.736261	-0.44171	3.67e-06	2.59e-05	3.71752	3.80412	3.84372	3.3515	3.37468	3.31388
PIPSL	0.736275	-0.441683	0.0195137	0.0348997	0.0176624	0.202237	0.240571	-0.116064	-0.24934	-0.491674
BOC	0.736402	-0.441435	0.0116016	0.0223209	0.849507	0.746652	0.462603	0.19958	0.198956	0.335707
GPRIN3	0.736403	-0.441432	0.0238899	0.0416348	1.02401	1.08058	1.38635	0.866029	0.976067	0.316908
AC009487.2	0.736437	-0.441365	0.0162447	0.0297491	1.54193	1.354	1.63165	1.07774	1.40657	0.695975
TCAF2	0.736517	-0.441209	0.0115428	0.0222275	0.602056	0.845174	0.497716	0.3211	0.213646	0.0959823
SLCO3A1	0.736691	-0.440868	1.56e-05	8.4e-05	3.09454	3.15523	3.14643	2.67056	2.74823	2.65124
PTK7	0.736865	-0.440527	1.36e-09	4.26e-08	7.25839	7.23111	7.21553	6.79762	6.79367	6.79211
FTLP3	1.3802	0.464873	0.0333379	0.0554809	0.0411383	-0.312512	-0.444883	-0.0201455	0.541797	0.125784
TNFAIP3	0.737014	-0.440236	0.000831	0.00230243	2.07255	1.88371	1.8726	1.55706	1.51974	1.42936
LYRM1	0.73738	-0.43952	6.23e-06	3.93e-05	4.14941	4.30817	4.17325	3.86067	3.72748	3.73304
LRRIQ3	0.737396	-0.439488	0.00411061	0.00911766	0.92502	1.00765	1.03249	0.668667	0.532944	0.452323
P2RY11	0.737446	-0.439391	9.26e-06	5.45e-05	4.10254	4.04266	4.16981	3.79045	3.58336	3.63182
CTSC	0.737487	-0.43931	2.01e-08	3.94e-07	6.06215	6.02542	6.02219	5.63924	5.55071	5.60419
C1orf131	0.737676	-0.438941	1.3e-06	1.12e-05	4.82295	4.90458	4.84753	4.37498	4.35674	4.5288
ARHGAP19	0.737735	-0.438826	4.57e-07	4.81e-06	5.63761	5.7522	5.75947	5.2943	5.33847	5.19942
OBSL1	0.737749	-0.438798	9.21e-05	0.000365	2.76444	2.63833	2.77982	2.35216	2.28095	2.23397
PLCB4	0.738133	-0.438048	0.000685	0.00195999	1.99792	2.0228	1.89322	1.53634	1.62943	1.42936
OSBPL6	0.738306	-0.437708	5.51e-06	3.57e-05	4.38677	4.45529	4.53857	3.91725	4.10597	4.03641
LACTB2	0.738373	-0.437578	1.84e-07	2.31e-06	5.12571	5.14188	5.16129	4.781	4.68831	4.65031
FHL1	0.738524	-0.437284	1.53e-05	8.29e-05	3.7234	3.68318	3.83014	3.37762	3.20958	3.34563
SLC9A7	0.738576	-0.437183	3.38e-06	2.42e-05	4.68505	4.75592	4.73185	4.31616	4.38431	4.15831
EIF3CL	0.738634	-0.437069	4.44e-07	4.71e-06	8.22812	8.07163	8.03929	7.62753	7.73805	7.66007
UTP20	0.738762	-0.436818	2.96e-07	3.37e-06	6.67754	6.58557	6.57745	6.13672	6.27416	6.11551
Z83844.3	0.738392	-0.437542	0.0624407	0.0957556	1.91862	2.77874	1.8122	1.88966	1.56915	1.77681
ARHGAP40	0.738773	-0.436797	0.0124517	0.0236715	0.70968	0.730468	0.569207	0.463302	0.227385	0.0189062
AC116562.4	0.738848	-0.43665	0.0029093	0.00679306	1.9088	1.67054	2.04674	1.50599	1.3304	1.48337
CFAP45	0.738852	-0.436642	0.0120159	0.0229653	0.300469	0.167843	0.172569	-0.200996	-0.233045	-0.235693
UQCC3	0.739067	-0.436223	2.5e-06	1.91e-05	5.31205	5.21002	5.21466	4.88713	4.68492	4.86245
MINCR	0.739101	-0.436156	0.0280447	0.0477827	0.198434	0.303749	0.25473	-0.540872	-0.109631	0.0830467
RHNO1	0.739307	-0.435755	1.24e-07	1.7e-06	5.14295	5.12026	5.18109	4.69039	4.67967	4.7672
STK32A	1.37402	0.458403	0.049774	0.0787116	0.0918174	-0.27332	-0.49687	-0.0379647	0.616445	0.0830467
PRRT4	0.739377	-0.435617	0.000361	0.00114098	2.22773	2.21201	2.29411	1.80297	1.91667	1.69965
PTGES	0.739508	-0.435363	2.6e-06	1.96e-05	4.35007	4.41204	4.26522	3.86067	3.88951	3.97131
FKRP	0.739702	-0.434985	1.19e-06	1.04e-05	4.3369	4.22788	4.24394	3.87065	3.8193	3.8146
ETV4	0.739848	-0.4347	6.28e-08	9.82e-07	5.92686	5.81539	5.8904	5.45344	5.41314	5.4622
TGFBR2	0.739962	-0.434478	1.95e-06	1.55e-05	4.8477	4.96078	4.95278	4.37899	4.54168	4.5319
TASP1	0.740093	-0.434221	5.04e-05	0.000222	3.37667	3.62398	3.58063	3.0957	3.08073	3.10738
ADAMTS17	0.740161	-0.434089	0.00146578	0.00375053	1.47228	1.43989	1.41876	1.03934	1.04907	0.938865
MAP3K6	0.740183	-0.434047	6.73e-07	6.54e-06	4.35007	4.28541	4.27827	3.87399	3.83718	3.90144
PRIM1	0.740432	-0.433562	1.39e-07	1.86e-06	5.65825	5.73435	5.66663	5.24084	5.31906	5.19676
TLCD1	0.740493	-0.433442	4.11e-06	2.84e-05	4.43256	4.28541	4.25133	3.9152	3.89208	3.86068
RIN2	0.740639	-0.433157	0.0225333	0.0395669	0.119264	0.26607	0.0232959	-0.136095	-0.233045	-0.515537
PTGER4	0.740668	-0.4331	0.000999	0.00269797	2.15346	2.15268	1.98745	1.61473	1.81305	1.55554
AGFG2	0.740735	-0.432971	1.3e-05	7.21e-05	3.65208	3.63964	3.69536	3.28636	3.29297	3.10738
FTH1P10	1.37119	0.455429	0.0385421	0.063094	0.363861	0.38632	0.0201501	1.09125	0.754049	0.307026
PRRX2	0.740822	-0.432801	0.000279	0.000922	3.86399	3.62398	3.48658	3.28092	3.18444	3.21249
HOTAIRM1	0.740891	-0.432666	0.0113954	0.0219761	1.35026	0.952148	1.30649	0.648485	0.69272	0.96044
ASRGL1	0.741482	-0.431517	4.54e-08	7.63e-07	5.31823	5.31792	5.32533	4.87946	4.85932	4.92898
MESP1	0.741595	-0.431296	0.000692	0.00197611	3.10711	2.86784	2.95217	2.73585	2.36267	2.55135
FAM222A-AS1	0.741828	-0.430844	9.63e-05	0.000379	2.53186	2.61253	2.5602	2.18249	2.14564	2.08748
FA2H	0.742012	-0.430486	0.00460132	0.0100285	2.29966	1.99296	2.27154	2.02963	1.6657	1.58959
ARID3A	0.742237	-0.430048	5.56e-06	3.59e-05	4.17744	4.01373	4.11245	3.73304	3.63969	3.64256
GPR3	0.742672	-0.429202	9.79e-05	0.000384	2.7598	2.68273	2.76478	2.40509	2.23586	2.28669
TMEM98	0.742698	-0.429152	3.23e-07	3.61e-06	4.90859	4.92632	4.92909	4.56248	4.42723	4.49258
NUBP1	0.743134	-0.428305	9.09e-08	1.32e-06	5.18166	5.13465	5.11517	4.69152	4.71344	4.7404
CYP26B1	0.743204	-0.42817	9.68e-06	5.65e-05	3.43194	3.45465	3.42217	2.93199	3.06489	3.02049
RAB43	1.36819	0.452272	0.0470888	0.0749841	3.02506	2.31947	1.91271	2.69875	3.14298	2.7345
EEF2K	0.743591	-0.427419	1.8e-07	2.28e-06	5.38271	5.45444	5.48284	5.04636	5.03265	4.95968
MTSS1	0.743749	-0.427112	4.81e-05	0.000214	3.07635	3.14181	3.0882	2.68729	2.76603	2.56792
GVQW3	1.36766	0.451709	0.0389133	0.0635817	-0.516797	-0.0908941	-0.258759	-0.164822	0.172145	0.474182
PKD1P1	0.743904	-0.426811	0.0154429	0.0284953	1.10142	0.841293	0.795518	0.345637	0.740664	0.348029
LINC02086	0.743937	-0.426749	0.0282213	0.0480334	0.799665	0.683272	0.25473	-0.00725352	0.198956	0.256428
AL121768.1	0.743993	-0.426639	0.00508223	0.0109286	1.24018	1.52478	1.56934	1.10561	0.913634	1.0499
PINX1	0.74403	-0.426568	1.15e-07	1.6e-06	5.31436	5.31474	5.32641	4.88438	4.83955	4.95364
MEAK7	0.744191	-0.426255	3.55e-07	3.9e-06	5.01874	5.00117	5.07583	4.53878	4.61681	4.65809
COL27A1	0.74423	-0.426179	0.000475	0.00143855	2.50523	2.28059	2.36998	1.90887	2.03922	1.91679
TRMT10C	0.74453	-0.425598	1.03e-08	2.27e-07	6.5021	6.48715	6.45233	6.02092	6.06256	6.08035
PDGFA	0.744614	-0.425436	0.000475	0.00143855	2.7828	2.70069	2.97248	2.52104	2.30552	2.36267
EMBP1	0.744756	-0.42516	0.0279152	0.047587	0.187651	0.406957	0.476105	0.131869	-0.358731	0.0475997
KRT10	0.744856	-0.424966	3.62e-06	2.56e-05	5.57014	5.45444	5.37989	5.11369	4.95295	5.06754
MEST	0.744867	-0.424945	5.33e-08	8.65e-07	6.24895	6.31762	6.33838	5.92144	5.8802	5.82987
AC005329.1	0.74496	-0.424765	0.00780291	0.0158306	1.63382	1.20194	1.36814	0.866029	0.999157	1.0499
PCOLCE	0.745055	-0.424581	0.0101978	0.019932	0.995103	0.849507	0.657432	0.513784	0.335707	0.385294
LINGO1	0.745505	-0.423709	2.64e-06	1.99e-05	4.232	4.23932	4.19333	3.87522	3.81124	3.71001
DUS2	0.745991	-0.42277	2.7e-06	2.03e-05	4.76441	4.63034	4.604	4.25996	4.18989	4.28222
PYGO1	0.746043	-0.422669	0.0194047	0.0347095	0.86389	1.08058	1.19635	0.433137	0.489696	0.952221
TARS2	0.746192	-0.422381	2.42e-06	1.85e-05	4.06849	4.02505	3.98996	3.65928	3.55513	3.60662
AHRR	0.746499	-0.421788	0.000286	0.00094	2.63922	2.45679	2.5581	2.10319	2.21538	2.05936
RAB3IP	0.746586	-0.42162	5.5e-06	3.56e-05	4.60167	4.68831	4.65408	4.19378	4.34913	4.1302
RUSC2	0.746629	-0.421537	1.52e-06	1.27e-05	4.11049	4.04397	4.11245	3.704	3.64161	3.65855
MRPL22	0.746728	-0.421346	2.64e-07	3.09e-06	5.69618	5.59965	5.56539	5.22527	5.15787	5.21552
LMLN	0.74705	-0.420724	9.83e-05	0.000385	3.3346	3.38616	3.38366	2.94273	3.09791	2.79291
PDLIM1	0.747108	-0.420612	4.51e-08	7.6e-07	5.73603	5.75765	5.72442	5.3716	5.28974	5.29774
TRIAP1	0.747269	-0.4203	2.09e-08	4.04e-07	6.29143	6.28304	6.30329	5.84379	5.84718	5.92583
MAPKBP1	0.747493	-0.419868	1.19e-06	1.05e-05	4.44156	4.40952	4.37637	4.0158	4.03168	3.919
PELI2	0.747497	-0.419861	0.0118103	0.0226321	0.799665	1.11835	0.774028	0.593481	0.425283	0.427822
PDX1	0.747671	-0.419524	0.00878746	0.0174896	1.13276	1.35672	1.24079	0.897908	0.590485	1.00372
AL034430.1	0.748091	-0.418715	0.00189571	0.00468822	2.25054	2.4291	2.44504	2.04447	1.73634	2.10977
AL669918.1	0.748569	-0.417793	0.00167768	0.00421248	4.0182	3.74971	3.55058	3.20344	3.45882	3.38616
C10orf88	0.748672	-0.417595	8.35e-07	7.81e-06	4.31868	4.26216	4.25996	3.85444	3.88951	3.84154
PCSK5	0.74869	-0.417559	2.73e-05	0.000134	3.06909	3.11048	3.12004	2.68729	2.62811	2.73592
MLF1	0.74875	-0.417444	3.14e-08	5.66e-07	5.56342	5.55601	5.53578	5.11064	5.14069	5.15056
PLEKHA8P1	0.749209	-0.41656	0.0142613	0.0265823	0.784171	0.925377	0.520474	0.349484	0.330615	0.304658
JADE2	0.749317	-0.416353	1.31e-06	1.13e-05	5.57584	5.48668	5.47888	5.19534	5.08891	5.01057
ADORA2B	0.749642	-0.415725	2.47e-08	4.68e-07	5.79083	5.78616	5.7522	5.35763	5.34277	5.38216
ERO1B	0.749962	-0.41511	0.000419	0.00129153	2.55542	2.4892	2.6889	2.05692	2.25384	2.16397
TRIM52-AS1	0.750214	-0.414626	0.0021093	0.00514644	1.86511	2.13241	2.06371	1.62179	1.48337	1.72592
MISP3	0.750268	-0.414522	0.00410964	0.00911707	1.10561	1.03934	1.06212	0.593481	0.709425	0.653813
MT2A	0.750589	-0.413905	5.51e-07	5.6e-06	7.65062	7.4858	7.56836	7.18647	7.0742	7.20351
COQ10A	0.750656	-0.413776	0.00238669	0.0057162	2.77324	2.37065	2.57808	2.2917	2.13787	2.05103
NTN1	0.750703	-0.413687	7.69e-06	4.67e-05	3.72183	3.73083	3.64701	3.28092	3.34029	3.23443
AMPD3	0.751115	-0.412894	6.02e-07	6.01e-06	4.3369	4.35048	4.32624	3.92747	3.89876	3.95042
TPPP	0.751616	-0.411931	3.91e-05	0.00018	3.07635	3.11048	3.16527	2.77135	2.64505	2.70751
EP400	0.751712	-0.411749	6.92e-08	1.06e-06	6.80366	6.76221	6.84591	6.3662	6.45731	6.35064
GRAMD1C	0.751949	-0.411293	0.000361	0.0011425	2.41859	2.53933	2.56524	2.16242	1.99296	2.14624
GRM4	0.752008	-0.41118	0.00769669	0.0156541	0.813426	0.76259	0.975849	0.415575	0.44743	0.452323
ZFP36L2	0.752134	-0.410938	6.41e-08	9.98e-07	6.12085	6.11569	6.14646	5.68126	5.78244	5.68351
EPHX4	0.752211	-0.41079	0.000719	0.00204059	2.25396	2.41753	2.3768	1.87406	1.86614	2.08038
TNS1	0.752481	-0.410273	1.3e-05	7.2e-05	3.60863	3.69113	3.59099	3.14632	3.25169	3.25815
SESN1	0.752578	-0.410087	4.1e-06	2.83e-05	3.98277	4.00354	3.93689	3.63642	3.51831	3.54457
2023-03-03	0.753455	-0.408407	0.00782609	0.0158689	1.32157	1.06691	1.17186	0.947043	0.665953	0.730878
GNE	0.753461	-0.408395	2e-06	1.58e-05	4.99537	5.02226	5.02925	4.67736	4.49518	4.65679
MGST2	0.753645	-0.408044	0.000124	0.000466	3.66526	3.43673	3.61683	3.27052	3.08073	3.14937
TGFBR3	0.75425	-0.406886	1.58e-05	8.51e-05	3.87171	3.77005	3.89671	3.48499	3.48108	3.34952
TP53I13	0.754363	-0.40667	0.00117244	0.00309728	3.8472	3.56936	3.55272	3.4103	3.04769	3.30651
MEF2B	0.752338	-0.410546	0.361367	0.437164	-0.32284	1.07055	1.75485	1.14827	0.238488	-0.0551009
PLEKHA7	0.754432	-0.406538	0.000696	0.001985	2.68917	2.76683	2.66691	2.46074	2.34433	2.10574
ERI1	0.754578	-0.406257	1.96e-09	5.76e-08	7.67626	7.67547	7.70245	7.26624	7.28032	7.28859
PLCH1	0.754728	-0.405971	9.07e-05	0.00036	3.16736	3.24166	3.28412	2.75829	2.9486	2.75829
FGFBP3	0.754873	-0.405695	0.000253	0.000845	2.36316	2.30072	2.3638	1.9638	1.92306	1.92455
EMC2	0.754908	-0.405628	3.15e-07	3.54e-06	5.33418	5.44537	5.45112	5.00745	5.00823	4.99918
ZNF503-AS1	0.754923	-0.405599	0.000853	0.00235848	2.12038	2.25831	2.06435	1.74486	1.68607	1.8024
AC098487.1	0.755165	-0.405136	0.0239826	0.0417683	0.260717	0.620583	0.34736	-0.0726825	-0.0520824	0.144235
DLGAP1-AS2	0.755286	-0.404904	0.00189	0.00467886	1.88672	1.7031	1.89322	1.43912	1.34193	1.48866
AMZ2P1	0.755484	-0.404528	0.000143	0.000522	2.68091	2.75062	2.71933	2.25238	2.39898	2.27867
CNIH3	1.34886	0.431736	0.0317771	0.0532575	-0.38654	-0.545466	-0.306297	-0.234369	0.0215631	0.256428
ANKHD1-EIF4EBP3	0.755607	-0.404292	0.0011676	0.00308635	5.15036	4.77649	5.19062	4.78227	4.52232	4.60492
BIRC6	0.75586	-0.403809	1.02e-06	9.28e-06	6.36977	6.46205	6.4586	5.9478	6.12994	5.99759
LIPE	0.755899	-0.403735	3.75e-05	0.000174	3.74476	3.61828	3.63236	3.2485	3.35906	3.16819
CYP27B1	0.75611	-0.403332	0.000351	0.00111735	2.59766	2.49911	2.51318	2.07213	2.07193	2.25474
ZNF22	0.756263	-0.40304	2.77e-06	2.06e-05	4.54168	4.58732	4.45981	4.18235	4.12634	4.07428
PDLIM2	0.756447	-0.40269	5.1e-06	3.36e-05	4.37789	4.2714	4.23619	3.94447	3.84896	3.88704
PHF7	0.75668	-0.402245	0.0157826	0.0290358	1.15454	1.64328	1.38635	0.851718	0.976067	1.15387
KIAA1257	0.757068	-0.401505	0.000808	0.00225028	2.23974	2.39163	2.47734	2.04767	1.95522	1.9088
CTHRC1	0.75712	-0.401406	0.00427824	0.00942849	1.66648	1.8895	1.71873	1.19707	1.34193	1.52968
MDC1	0.757194	-0.401264	2.94e-07	3.36e-06	6.30524	6.26762	6.27195	5.82511	5.97344	5.83831
MAML2	0.757395	-0.400883	0.005133	0.011025	1.77681	1.6738	1.9952	1.30756	1.35464	1.57624
MINDY3	0.757598	-0.400496	1.18e-06	1.04e-05	5.03366	5.15413	5.0623	4.72892	4.62468	4.7006
RHEBP1	0.756617	-0.402364	0.429489	0.503855	-0.0838126	-0.8646	0.341555	-2.1951	0.21027	0.0581712
SORL1	0.757711	-0.400281	1.14e-07	1.59e-06	5.28728	5.27003	5.30736	4.86936	4.92313	4.86911
AL392172.1	0.757856	-0.400003	0.00890072	0.0176844	0.995103	0.88777	0.832762	0.625893	0.406957	0.491482
TTC9	0.758085	-0.399569	0.00517662	0.0111059	1.97635	2.34709	2.05692	1.8853	1.72318	1.58959
TESK2	0.758093	-0.399554	0.0055224	0.0117587	1.17445	1.35672	1.354	0.927961	0.782745	0.986711
SNAI3	0.758109	-0.399523	0.0105035	0.0204468	1.02401	0.825959	0.757705	0.534736	0.44743	0.427822
AC068946.2	0.757573	-0.400543	0.0621146	0.095334	1.18112	0.946272	1.17563	1.2327	0.643383	0.24667
EVA1A	0.758142	-0.399459	0.00333806	0.00764084	1.63382	1.61133	1.61364	1.35672	1.04907	1.27045
MAP3K12	0.75823	-0.399292	0.000213	0.00073	3.17572	3.20729	3.04671	2.64177	2.70944	2.87879
NAPA-AS1	0.758504	-0.398771	0.00589559	0.0124354	1.07971	1.29368	1.17186	0.866029	0.746375	0.746302
RPS6KA5	0.758552	-0.398679	1.01e-05	5.86e-05	3.76181	3.85157	3.87048	3.38749	3.48658	3.40987
AC090204.1	0.758561	-0.398663	0.000556	0.00164524	2.1304	2.11661	2.185	1.68311	1.75515	1.7935
NME5	0.758896	-0.398026	0.00781365	0.0158499	1.2645	1.64328	1.53725	1.13707	1.11786	1.00372
LINC00857	0.758911	-0.397997	5.66e-06	3.65e-05	3.72995	3.7271	3.76718	3.37596	3.30149	3.35659
MOSMO	0.759046	-0.397741	4.32e-05	0.000195	3.60564	3.73083	3.74884	3.36596	3.33548	3.19373
IDS	0.759079	-0.397678	1.25e-07	1.71e-06	6.02207	6.10246	6.12412	5.6535	5.7168	5.68409
HACD1	0.759131	-0.397579	8.59e-05	0.000344	3.17233	3.1342	3.15243	2.64177	2.75427	2.86371
ANLN	0.759575	-0.396736	7.35e-09	1.72e-07	8.00355	8.01873	8.03339	7.6107	7.66814	7.58585
ZC3H12A	0.75958	-0.396725	0.000171	0.000608	2.7828	2.73562	2.84858	2.30716	2.39703	2.46664
FTH1P2	1.3445	0.427071	0.0301017	0.0508618	-0.548649	-0.127415	-0.199643	-0.057886	0.187651	0.271545
SMG1P2	0.759594	-0.3967	0.00116299	0.00307667	3.13514	2.94927	3.05921	2.4194	2.82439	2.68306
MAN2B1	0.759666	-0.396562	2.12e-07	2.6e-06	5.62537	5.53832	5.52535	5.16236	5.14722	5.18953
CTSV	0.760033	-0.395866	1.15e-06	1.02e-05	4.46883	4.53376	4.49275	4.06849	4.08896	4.15056
NFATC2	0.760185	-0.395577	0.00903675	0.0179137	1.69218	2.03922	1.68456	1.59671	1.27252	1.385
OSGIN1	0.760229	-0.395493	4.04e-06	2.79e-05	4.01432	4.0521	3.98515	3.65567	3.64417	3.56637
DNER	0.760367	-0.395232	0.000786	0.00219543	2.32634	2.16702	2.1991	1.90112	1.84855	1.75636
RBMS2	0.760376	-0.395216	5.17e-05	0.000226	3.79025	4.03257	3.88455	3.54027	3.47523	3.5137
RGS5	0.760506	-0.394969	0.0081777	0.0164806	1.87764	1.76827	1.96145	1.67122	1.19158	1.58325
DHPS	0.760566	-0.394855	6.52e-07	6.37e-06	5.36912	5.30582	5.30242	4.90947	4.87765	5.00636
SPATA24	0.760901	-0.394219	0.0199364	0.0355386	1.10561	0.683272	0.975849	0.668667	0.425283	0.491482
CRIP2	0.76093	-0.394164	6.21e-05	0.000264	3.63499	3.52323	3.43242	3.19411	3.12793	3.08795
MRPL1	0.760935	-0.394155	6.43e-08	9.98e-07	6.20331	6.18369	6.27195	5.83155	5.8017	5.84379
TUBA4A	0.76111	-0.393824	1.32e-06	1.13e-05	6.16092	5.99294	6.01366	5.6946	5.61798	5.67439
RRAS	0.76117	-0.393709	1.01e-05	5.86e-05	4.48228	4.34095	4.41728	4.01326	3.94304	4.10455
OLFML2B	0.7615	-0.393084	0.0103298	0.0201475	1.15454	0.939534	0.86389	0.625893	0.602525	0.547855
ATR	0.761526	-0.393035	9.89e-06	5.75e-05	5.48494	5.32098	5.3961	5.01596	5.10329	4.89851
MAGOH	0.761557	-0.392975	5.05e-08	8.31e-07	6.14475	6.09721	6.08323	5.72172	5.68343	5.74192
PIGL	0.761588	-0.392917	4.43e-05	0.0002	3.59215	3.46682	3.45882	3.17397	3.12968	3.03534
RBPMS	0.761815	-0.392488	2.07e-05	0.000106	3.41766	3.47035	3.38024	3.06567	2.99005	3.04053
MECOM	0.76192	-0.392289	7.21e-05	0.000298	3.38024	3.31855	3.50013	3.03353	3.04639	2.93939
ELP4	0.76284	-0.390547	9.67e-07	8.82e-06	4.76882	4.74258	4.69199	4.3043	4.33409	4.39206
MRAP2	0.763183	-0.389898	0.00564668	0.0119861	1.56314	1.68311	1.43098	1.26809	1.02929	1.22591
PCTP	0.763286	-0.389704	1.09e-06	9.72e-06	4.51006	4.48532	4.4637	4.05407	4.13253	4.09958
POLR3GL	0.763302	-0.389674	6.89e-06	4.27e-05	3.64205	3.65187	3.61924	3.25863	3.24328	3.24328
ARHGEF6	0.763473	-0.38935	0.0250584	0.0433869	0.614081	1.08058	0.757705	0.388195	0.358967	0.547855
L3HYPDH	0.763589	-0.389131	0.010043	0.0196768	1.29082	1.49223	1.67724	0.958856	1.18317	1.1426
CECR2	0.763713	-0.388898	0.000893	0.0024513	2.61722	2.6176	2.85646	2.23489	2.40277	2.27606
TRMT1	0.76392	-0.388507	5.68e-08	9.03e-07	6.81507	6.72919	6.71342	6.37502	6.36042	6.35647
MTMR6	0.764005	-0.388345	1.24e-07	1.7e-06	5.64345	5.65656	5.69214	5.31436	5.28039	5.23341
HERC5	0.764008	-0.38834	1.63e-05	8.75e-05	3.93755	4.06763	4.00913	3.53758	3.68558	3.62091
HOXA9	0.764115	-0.388138	4.85e-08	8.03e-07	6.53564	6.55684	6.60545	6.18961	6.13795	6.2072
NR2C1	0.764147	-0.388079	7.84e-06	4.74e-05	3.79523	3.87746	3.79099	3.45174	3.44643	3.40294
SOX8	0.764199	-0.38798	0.000189	0.000662	3.15229	2.96632	3.04382	2.75285	2.63395	2.61448
FXYD5	0.76439	-0.38762	1.72e-07	2.2e-06	5.51007	5.50524	5.45444	5.14547	5.08291	5.08063
PAK6	0.764433	-0.387538	1.72e-06	1.4e-05	5.20097	5.12375	5.07503	4.75839	4.79439	4.68207
UBE2T	0.76458	-0.387261	2.16e-07	2.64e-06	6.11569	6.12552	6.16218	5.78875	5.67248	5.78363
MRPL46	0.764586	-0.38725	9.41e-07	8.61e-06	5.11474	5.02401	5.12729	4.73583	4.65552	4.71484
PFKFB3	0.764896	-0.386664	3.79e-08	6.58e-07	6.3816	6.39581	6.35356	5.9886	6.02649	5.95511
AL512625.3	0.765005	-0.386458	0.0160158	0.0293736	1.03192	1.06975	1.12948	0.883671	0.425283	0.78596
NKX2-8	0.765263	-0.385973	0.000776	0.00217199	2.03769	2.06407	2.10983	1.65701	1.72318	1.67005
NYAP1	0.765718	-0.385114	0.0110174	0.0213292	1.92388	2.27206	2.00313	1.64093	1.48337	1.93753
CDC14A	0.765857	-0.384853	0.000115	0.000439	2.99469	3.16527	3.06909	2.66682	2.68365	2.72669
THEMIS2	0.766015	-0.384556	0.000347	0.001107	3.08396	3.28469	3.06509	2.72968	2.85272	2.69465
TXK	0.76459	-0.387241	0.072008	0.108688	-0.193941	0.0680435	0.0959823	-0.801141	-0.109631	-0.306297
SEC14L2	0.766016	-0.384554	4.75e-06	3.18e-05	4.16477	4.09563	4.07896	3.70456	3.70397	3.77649
PPIL6	0.766313	-0.383994	0.0162559	0.0297636	0.489696	0.635646	0.532707	0.275427	0.125784	0.114049
CENPS-CORT	0.765128	-0.386226	0.0984743	0.143003	0.0664774	0.577969	0.764294	0.129758	0.412174	-0.299076
SP9	0.765153	-0.38618	0.0663636	0.1012	0.387269	0.281292	-0.258759	-0.313944	-0.260626	-0.176047
AFG1L	0.766597	-0.38346	0.00225204	0.00543971	1.75515	1.85809	1.92943	1.46795	1.385	1.54595
AHNAK	0.766619	-0.383419	2.47e-06	1.88e-05	7.78781	7.88308	7.94483	7.40569	7.58671	7.47081
NDUFS2	0.766639	-0.38338	1.55e-07	2.04e-06	6.50796	6.46729	6.39558	6.07425	6.04085	6.10623
DEPDC7	0.766663	-0.383336	0.000847	0.00234631	3.45377	3.45174	3.74884	3.09174	3.29297	3.10738
S1PR5	0.766796	-0.383085	0.00136377	0.0035311	2.59766	2.58026	2.52321	2.18936	2.00506	2.36931
IFFO2	0.766961	-0.382774	3.16e-07	3.55e-06	5.38271	5.3889	5.4136	5.03911	5.04774	4.94957
CNN3	0.767166	-0.382389	5.93e-09	1.44e-07	7.29498	7.31612	7.31823	6.9296	6.91098	6.94205
COG2	0.767443	-0.381868	4.11e-07	4.43e-06	5.88863	5.78052	5.77133	5.40314	5.44981	5.43961
RPL13P12	0.767502	-0.381757	0.0189103	0.033965	1.6613	1.64928	1.57581	1.35026	1.50187	0.879023
ARMC2	0.767877	-0.381052	0.0212	0.037501	0.550974	0.620583	0.817303	0.14282	0.270364	0.427822
B3GNT7	0.767965	-0.380888	0.000779	0.0021792	3.02762	3.07665	3.19957	2.66682	2.90108	2.57945
EIF4EBP3	0.766685	-0.383294	0.0793156	0.118225	0.881928	0.507137	0.267433	0.497716	-0.176047	0.210725
SRR	0.768051	-0.380725	0.000215	0.000737	2.8662	2.84454	2.93183	2.39516	2.51113	2.58723
HIST2H2AA4	0.76689	-0.382909	0.201716	0.264722	1.77106	1.48087	0.766222	0.262476	1.06691	1.5004
NOTUM	0.768194	-0.380457	0.0228329	0.0400121	1.55604	1.11835	1.23102	0.897908	0.746375	1.12038
PIK3C2B	0.768341	-0.380182	3.45e-06	2.47e-05	4.40775	4.35793	4.44102	3.99329	4.08262	3.9851
RPS3AP5	0.767301	-0.382135	0.0868606	0.128079	0.183895	-0.306297	0.220294	-0.479142	-0.56379	-0.00932339
POLQ	0.768345	-0.380173	4.18e-06	2.87e-05	4.95679	5.06425	5.08125	4.59249	4.73137	4.63362
BLM	0.768361	-0.380143	8.34e-08	1.23e-06	5.73676	5.70569	5.68243	5.32326	5.34621	5.31398
TGS1	0.768569	-0.379754	1.36e-07	1.83e-06	6.1872	6.17198	6.17277	5.78485	5.86007	5.74557
SOX18	0.769119	-0.378721	0.00202503	0.00497157	2.54081	2.24627	2.32024	2.07679	1.94857	1.94699
NCMAP	1.32796	0.409216	0.0327094	0.0546219	-0.157923	0.0894458	0.512654	0.572292	0.532944	0.570929
ODF3B	0.768058	-0.380714	0.0866513	0.127799	0.10647	0.10007	-0.412296	-0.15152	-0.689051	-0.483047
ANKRD26	0.769216	-0.378539	0.0151205	0.0279877	1.18725	1.02804	1.10561	0.668667	0.951099	0.547855
AIP	0.769315	-0.378354	5.72e-07	5.77e-06	5.61856	5.54805	5.52881	5.18084	5.13876	5.24168
MARS2	0.76944	-0.378118	7.32e-07	7e-06	4.97306	4.95976	4.91893	4.58443	4.61071	4.52096
TMEM109	0.769448	-0.378104	9.05e-08	1.31e-06	5.97299	5.9481	5.97234	5.56842	5.55657	5.63435
LRIF1	0.76945	-0.378101	1.92e-06	1.53e-05	4.78836	4.85058	4.79276	4.46258	4.47635	4.35848
SCML1	0.769495	-0.378017	0.00018	0.000635	2.74441	2.71996	2.70944	2.2917	2.40715	2.33374
TMEM199	0.76977	-0.3775	7.05e-06	4.36e-05	5.25116	5.18109	5.24123	4.90653	4.72365	4.91672
C1QTNF1	0.769934	-0.377194	0.0101937	0.0199271	1.91189	1.86947	1.68456	1.69903	1.42278	1.22591
TVP23C	1.32512	0.406125	0.0457851	0.0731316	0.963632	0.714827	1.56441	1.26061	1.6027	1.57288
NUP214	0.770014	-0.377043	3.6e-06	2.56e-05	5.78519	5.74092	5.74366	5.31197	5.50187	5.31823
TAF1C	0.770292	-0.376522	1.36e-07	1.84e-06	5.5261	5.51984	5.54936	5.16987	5.17706	5.11835
DOCK9	0.770381	-0.376356	8.14e-07	7.65e-06	5.62777	5.71911	5.71464	5.24035	5.34123	5.34854
FAM133B	0.770606	-0.375935	7.83e-07	7.41e-06	5.63796	5.76893	5.70953	5.28491	5.36224	5.34032
TRIM2	0.770622	-0.375905	4.44e-07	4.71e-06	5.52114	5.60945	5.60326	5.20858	5.23788	5.15942
RND3	0.770714	-0.375733	2.17e-06	1.69e-05	4.43902	4.4817	4.47097	4.06321	4.05484	4.14767
ITGA3	0.770762	-0.375642	1.34e-08	2.8e-07	8.03803	7.97979	7.97545	7.62534	7.64586	7.59457
PMF1-BGLAP	1.32354	0.404401	0.0426826	0.0688427	-0.206606	0.122082	0.245362	0.441013	0.215216	0.734371
ENKD1	0.770797	-0.375577	0.00363437	0.00822229	2.03769	1.95985	1.8375	1.69903	1.42278	1.60074
UNC5B	0.771042	-0.375119	1.25e-05	7e-05	4.75647	4.69548	4.65106	4.32094	4.4254	4.22583
AP4S1	0.771277	-0.374679	0.000131	0.000488	3.33981	3.37312	3.25536	2.93199	2.85921	3.05874
AC011603.2	0.770643	-0.375866	0.0572953	0.0889962	0.818054	0.330615	0.217987	0.0146659	0.21027	-0.00232635
SSH1	0.771302	-0.374632	7.16e-07	6.87e-06	6.06905	6.16393	6.20108	5.71874	5.81132	5.77823
TNFRSF10B	0.771589	-0.374096	7.39e-08	1.11e-06	6.71489	6.79736	6.73537	6.37276	6.4082	6.34418
EXOSC8	0.771738	-0.373818	2.48e-07	2.95e-06	5.5298	5.5185	5.59242	5.14212	5.19534	5.1798
SMAGP	0.771757	-0.373782	2.58e-06	1.95e-05	4.91269	4.92313	4.89792	4.49518	4.48543	4.63275
DIMT1	0.772276	-0.372812	4.81e-08	7.97e-07	6.0435	6.05645	6.07102	5.70446	5.6893	5.65923
CFAP298	0.772384	-0.37261	5.55e-08	8.88e-07	6.49425	6.44341	6.52194	6.11214	6.10064	6.12881
FASTKD5	0.772452	-0.372482	3.46e-07	3.83e-06	5.47215	5.46038	5.43651	5.07667	5.13655	5.03613
GTF2H5	0.772646	-0.37212	2.21e-06	1.72e-05	4.54546	4.53715	4.57797	4.24792	4.14786	4.15255
TMEM218	0.772711	-0.372	7.15e-05	0.000296	3.74094	3.58167	3.68443	3.27834	3.22916	3.38366
LRRK1	0.773373	-0.370763	1.67e-05	8.88e-05	4.52653	4.46075	4.43256	4.05091	4.21358	4.03467
JRKL	0.774026	-0.369546	0.00181011	0.00450505	2.24727	2.43199	2.44987	1.87406	2.05261	2.08748
RTN2	0.774313	-0.369011	0.000188	0.00066	3.45535	3.24379	3.31588	3.00263	2.90592	3.00115
SNRPGP10	0.774343	-0.368956	0.0154863	0.0285552	1.90887	1.9631	1.92431	1.88162	1.57624	1.2474
ITGA9	1.31757	0.397879	0.0431861	0.0695258	-0.708913	-0.27332	-0.457734	-0.234369	0.0215631	-0.0379647
CRISPLD2	0.774482	-0.368696	0.000144	0.000527	3.26728	3.27431	3.229	3.00263	2.89234	2.77535
SMTNL2	0.774505	-0.368653	0.00362415	0.00820486	1.91189	1.82036	2.08057	1.64093	1.4949	1.57624
ELFN1	0.774642	-0.368399	0.00100158	0.00270401	2.67872	2.44883	2.47284	2.14489	2.17984	2.16397
ST20	0.773622	-0.3703	0.0793946	0.118302	0.253602	0.357338	0.455146	-0.469026	0.033907	0.370988
CCNYL2	0.774833	-0.368043	0.0140716	0.0262662	1.41295	1.77311	1.62243	1.4428	1.11786	1.16731
SDF2L1	0.775141	-0.367468	2.61e-07	3.06e-06	6.07867	6.05491	5.98057	5.67394	5.63993	5.69883
PSTPIP2	0.775145	-0.367462	1.34e-07	1.82e-06	5.64963	5.65927	5.66574	5.31197	5.25357	5.30872
CILP2	0.775385	-0.367016	4.38e-07	4.67e-06	5.03009	5.00745	4.9816	4.65921	4.63362	4.62603
NPM2	0.775394	-0.366998	0.013501	0.0253685	2.1593	2.014	2.10983	1.84887	1.40127	1.95522
MALSU1	0.775469	-0.366858	2.03e-07	2.5e-06	5.99967	5.95951	5.96254	5.66042	5.56121	5.60206
CCNK	0.775564	-0.366682	3.79e-08	6.58e-07	6.80055	6.78606	6.82432	6.44084	6.40119	6.46962
KCNG1	0.775573	-0.366665	1.39e-05	7.64e-05	5.0504	4.86715	4.86097	4.56422	4.5355	4.57797
MYH3	0.775133	-0.367483	0.0636698	0.0974799	0.489696	0.0680435	0.0959823	-0.234369	0.0954936	-0.331709
AC093512.2	0.775789	-0.366263	7.49e-06	4.58e-05	4.22015	4.19388	4.31768	3.87612	3.8943	3.86085
MGAT5	0.775904	-0.366049	9.75e-07	8.89e-06	6.02282	6.16751	6.11913	5.72591	5.77792	5.70707
ASMTL	0.775947	-0.36597	5.2e-06	3.41e-05	4.41288	4.31562	4.32201	3.99832	3.94566	4.00975
PAR_Y_ASMTL	0.775947	-0.36597	5.2e-06	3.41e-05	4.41288	4.31562	4.32201	3.99832	3.94566	4.00975
MRPL16	0.77606	-0.36576	2.23e-07	2.71e-06	6.29866	6.2201	6.23736	5.89748	5.83802	5.92437
EXOSC9	0.776074	-0.365734	2.47e-08	4.68e-07	6.66863	6.65962	6.63183	6.30471	6.28162	6.27699
MAP3K9	0.776159	-0.365576	3.77e-05	0.000174	4.62532	4.6535	4.66669	4.25336	4.4254	4.16243
MCM5	0.776264	-0.365381	6.74e-08	1.03e-06	8.33989	8.22482	8.23765	7.90314	7.90314	7.89945
CR2	0.7763	-0.365314	0.000231	0.000782	3.41376	3.53122	3.3276	3.04769	3.14845	2.97708
PRSS53	0.775832	-0.366183	0.060892	0.0936783	0.866642	0.72025	1.34436	0.357338	0.67807	0.778202
PCCB	0.776359	-0.365204	1.01e-07	1.44e-06	6.14372	6.0872	6.08433	5.76288	5.71574	5.74192
BAX	0.77664	-0.364683	1.36e-06	1.16e-05	6.15984	6.0879	6.0724	5.7771	5.65523	5.79673
UTP3	0.776667	-0.364632	4.57e-08	7.68e-07	6.40529	6.37922	6.42231	6.018	6.03184	6.06256
BTG2	0.776668	-0.36463	5.57e-06	3.59e-05	4.77499	4.86455	4.70271	4.39505	4.43525	4.41782
DAB2IP	0.776688	-0.364593	4.47e-07	4.72e-06	5.98513	5.97357	5.90902	5.56434	5.65135	5.55565
PAM16	0.776694	-0.364582	2e-05	0.000103	4.76663	4.58993	4.6696	4.37423	4.32405	4.23362
RUVBL1	0.776708	-0.364555	9.76e-09	2.16e-07	7.87674	7.82172	7.84171	7.49562	7.47643	7.47448
TUBGCP3	0.776979	-0.364052	1.39e-07	1.86e-06	6.24914	6.27496	6.24638	5.89165	5.94215	5.84336
SNX30	0.777076	-0.363873	5e-05	0.000221	4.94157	5.17354	5.11175	4.67212	4.79945	4.66133
TANC1	0.777398	-0.363275	5.06e-06	3.34e-05	5.17911	5.17013	5.16129	4.74033	4.91832	4.75534
PRSS22	0.77741	-0.363252	0.0117968	0.0226248	1.6477	1.33362	1.354	1.01258	1.04907	1.17695
HOXC13	0.777433	-0.36321	0.00223129	0.0053966	2.54528	2.4596	2.36998	2.28095	2.03922	1.97712
PPP1R9A	0.777507	-0.363072	1.58e-05	8.49e-05	4.07847	4.1724	4.10399	3.68853	3.82699	3.74498
LINC01106	0.777621	-0.362862	0.000346	0.00110311	3.2181	3.03098	3.04941	2.7992	2.75062	2.65901
TPK1	0.777854	-0.362428	0.0037877	0.00852184	1.87144	2.11661	1.95956	1.69903	1.64817	1.52062
RGS10	0.777888	-0.362365	5.87e-07	5.9e-06	6.03443	5.92938	5.98057	5.65005	5.56539	5.64345
SLC27A2	0.777919	-0.362308	1.67e-06	1.37e-05	5.04461	5.06495	4.97306	4.70559	4.67532	4.61625
TTC25	0.777127	-0.363777	0.054975	0.0859249	-0.103674	0.167843	0.385294	-0.266027	-0.260626	-0.111569
LRRC26	0.777186	-0.363667	0.117634	0.166249	0.537703	0.0240982	0.227385	0.388195	-0.469026	-0.191944
NGDN	0.778079	-0.362012	1.69e-07	2.18e-06	5.75144	5.81335	5.78363	5.40886	5.40407	5.45025
RARG	0.778083	-0.362004	4.8e-07	5e-06	6.05383	6.00656	6.00224	5.73108	5.60926	5.63934
RPIA	0.778142	-0.361894	3.79e-08	6.58e-07	6.49347	6.47616	6.4535	6.13289	6.10338	6.10174
GPN3	0.778221	-0.361748	1.39e-06	1.18e-05	5.68276	5.68671	5.69266	5.33887	5.23853	5.4029
EIF4BP7	0.777512	-0.363064	0.0689739	0.104727	0.714335	0.41137	0.827556	-0.114816	0.48402	0.461905
ENO3	1.30923	0.388721	0.0372619	0.0612137	-0.000416	-0.0587142	-0.187338	0.593481	0.198956	0.144235
PTPRU	0.778277	-0.361645	2.53e-07	2.99e-06	5.50717	5.4863	5.43785	5.12177	5.11299	5.1118
DAGLA	0.778407	-0.361403	0.00122583	0.00321548	2.55076	2.58475	2.63706	2.36852	2.07498	2.26263
DNAJC24	0.778549	-0.36114	4.34e-06	2.96e-05	4.79067	4.80423	4.84261	4.53317	4.37567	4.45185
MRPL10	0.778662	-0.360931	3.44e-08	6.13e-07	6.86284	6.82071	6.83757	6.50094	6.44914	6.48905
TEFM	0.778789	-0.360695	2.56e-05	0.000127	3.97131	4.07719	4.08051	3.60564	3.69385	3.74498
ACYP1	0.778841	-0.360599	5.64e-05	0.000243	3.22073	3.28068	3.26998	2.93439	2.86409	2.89617
DNHD1	0.778211	-0.361766	0.0581026	0.0900652	0.172251	0.46077	0.199247	-0.395113	0.0455571	0.0830467
PCBD1	0.778867	-0.360551	5.59e-08	8.91e-07	6.63926	6.61895	6.67569	6.2944	6.25382	6.30471
IQCJ-SCHIP1	0.778925	-0.360444	0.0010214	0.00275076	3.25146	3.31588	3.11527	2.92587	2.69665	2.99444
NOA1	0.779168	-0.359994	5.2e-07	5.34e-06	6.18924	6.09884	6.10735	5.82585	5.72771	5.76387
MRPL38	0.779195	-0.359944	8.98e-08	1.3e-06	7.54942	7.45327	7.45214	7.14069	7.10447	7.13004
MRPS2	0.779325	-0.359703	2.12e-07	2.6e-06	7.28762	7.17057	7.20599	6.89918	6.83268	6.85384
AATF	0.779358	-0.359641	1.78e-08	3.56e-07	7.29791	7.30803	7.25839	6.9151	6.94083	6.92909
FLVCR1	0.779361	-0.359636	2.81e-06	2.09e-05	5.28232	5.43483	5.41688	5.02097	5.02157	5.01416
HMCES	0.779419	-0.359529	5.84e-08	9.23e-07	6.848	6.85602	6.85131	6.53819	6.44825	6.49225
TMEM131L	0.779542	-0.359301	2.12e-06	1.66e-05	5.78177	5.79254	5.79364	5.35046	5.52946	5.40462
LAMB1	0.779626	-0.359146	1.92e-06	1.53e-05	5.69691	5.83177	5.76194	5.40535	5.45686	5.35046
SRP14-AS1	0.779698	-0.359013	0.0210473	0.037264	0.995103	1.09701	0.832762	0.783458	0.469852	0.61217
MGAT5B	0.77977	-0.358879	0.00978895	0.0192223	1.91189	1.76382	1.58863	1.4489	1.4949	1.23846
UBE2SP1	0.779868	-0.358698	0.00357521	0.00810393	1.90872	1.90613	1.8335	1.58883	1.38057	1.61492
LRRC37A2	0.780049	-0.358363	0.0167319	0.0305108	1.7583	2.02902	2.11898	1.73634	1.74486	1.35275
PPP1R13B	0.780158	-0.358162	0.000102	0.000396	3.35219	3.39328	3.28068	3.06567	2.96028	2.93247
EPB41L4B	0.78032	-0.357862	3.84e-06	2.69e-05	4.66853	4.67167	4.78588	4.35814	4.34218	4.35262
MSH5	0.780524	-0.357485	0.0130281	0.0245968	2.25977	2.01706	1.95424	1.62746	1.55653	1.97578
RPL26L1	0.780677	-0.357203	6.45e-07	6.34e-06	5.48126	5.39704	5.47109	5.10919	5.05772	5.1117
LINC00843	0.779711	-0.358988	0.0863944	0.127449	2.01134	1.22883	1.36767	1.41538	0.925377	1.20092
RNASET2	0.780714	-0.357134	6.24e-05	0.000265	4.31729	4.21232	4.33411	4.05864	3.83943	3.90248
AMDHD1	0.780739	-0.357088	0.0119046	0.0227961	1.9903	2.25831	2.185	2.07679	1.67177	1.64105
TMC5	0.780807	-0.356961	2.05e-05	0.000105	4.32405	4.33406	4.30972	3.87522	4.07333	3.93937
SNX25	0.78094	-0.356717	2.48e-05	0.000123	4.73641	4.87498	4.8556	4.3732	4.45981	4.56221
AVPI1	0.781093	-0.356433	5.94e-06	3.78e-05	4.47097	4.36431	4.39088	4.06461	4.01697	4.07603
GRB7	0.781142	-0.356344	5.91e-05	0.000253	3.83114	3.83092	3.67599	3.43693	3.38373	3.45174
FMC1	0.781355	-0.35595	0.00372894	0.00840996	3.10151	2.67908	2.90249	2.55653	2.48915	2.56486
TNFRSF21	0.781509	-0.355666	2.69e-08	5.01e-07	7.04047	7.09059	7.06508	6.72957	6.7046	6.69577
N4BP2	0.78154	-0.355609	0.000289	0.000948	3.97131	4.21386	4.22583	3.76544	3.86348	3.71375
SLC25A35	0.780776	-0.35702	0.057935	0.0898292	0.849507	1.08058	0.957201	0.810035	0.834001	0.173055
IFT27	0.781548	-0.355594	0.000159	0.000572	3.05084	3.11527	3.08292	2.77514	2.64505	2.77099
DDX56	0.781589	-0.355517	5.15e-08	8.45e-07	7.31447	7.27651	7.24828	6.94291	6.88688	6.94386
AC125807.2	0.781595	-0.355507	0.000856	0.0023676	4.08308	4.3915	4.3369	3.88441	4.04777	3.80912
KIF14	0.781719	-0.355278	1.21e-05	6.81e-05	5.78177	5.86855	5.87892	5.42814	5.61335	5.41686
NUDT1	0.78185	-0.355036	3.58e-05	0.000167	4.41652	4.34218	4.37637	4.1418	3.91725	4.02001
SLC4A8	0.782011	-0.35474	0.0272418	0.0465913	1.30688	1.52478	1.38635	1.15454	1.26532	0.730878
SLF1	0.782086	-0.354601	0.000131	0.000488	4.65921	4.70064	4.68748	4.40682	4.43525	4.14012
NUP54	0.782092	-0.35459	9.99e-08	1.43e-06	6.42891	6.36367	6.36628	6.04561	6.03771	6.01146
NCBP2-AS2	0.782756	-0.353366	8.22e-06	4.94e-05	3.919	3.91253	3.88545	3.55272	3.54898	3.55538
MINPP1	0.782786	-0.353311	7.38e-07	7.05e-06	5.32767	5.38073	5.36898	5.04929	5.01371	4.95611
NTHL1	0.782878	-0.35314	1.91e-06	1.52e-05	5.19785	5.11023	5.11707	4.82628	4.73757	4.80423
TMEM42	0.782887	-0.353123	0.00583622	0.0123242	1.61255	1.66263	1.74602	1.33324	1.19715	1.43989
FBXO10	0.782919	-0.353065	0.000496	0.0014931	2.72145	2.91437	2.8662	2.45679	2.49561	2.49207
YRDC	0.782939	-0.353027	8.17e-08	1.21e-06	6.27125	6.25144	6.22116	5.91701	5.8802	5.88837
CSTF3	0.783095	-0.352741	1.58e-07	2.07e-06	6.13266	6.05352	6.09007	5.74201	5.74961	5.72554
SERF1A	0.782572	-0.353704	0.313547	0.387958	0.203711	0.0567471	-0.56379	0.52695	-1.08541	-0.738626
P2RX7	1.29965	0.378125	0.0333001	0.0554322	0.172251	0.443452	0.172569	0.388195	0.817579	0.701553
SLC25A15	0.783172	-0.3526	1.68e-07	2.17e-06	6.00268	5.9808	5.93523	5.59791	5.62772	5.63435
PPFIBP2	0.783239	-0.352476	0.00556712	0.0118403	1.70561	1.58274	1.54838	1.34332	1.18317	1.25906
FBXO27	0.783404	-0.352171	5.23e-05	0.000229	3.46483	3.48261	3.49282	3.14296	3.18444	3.05397
ZNF554	1.29934	0.377782	0.0480375	0.0762432	0.761091	1.00765	0.304973	1.26809	1.04907	0.906434
FKBP5	0.783618	-0.351778	1.61e-07	2.1e-06	7.28373	7.36547	7.37309	6.94897	7.02651	6.99043
GSDME	0.783962	-0.351145	0.0029985	0.0069726	2.12038	2.21201	2.02852	1.64801	1.84855	1.8024
SH3BP1	0.783976	-0.351118	1.52e-06	1.27e-05	6.08095	5.95555	5.95221	5.62115	5.68276	5.62873
SETD3	0.784335	-0.350458	9.92e-08	1.42e-06	6.14441	6.18887	6.20561	5.82832	5.83076	5.82866
POLR3K	0.784352	-0.350427	5.93e-06	3.78e-05	5.19785	5.11192	5.1586	4.77796	4.74113	4.89851
ST5	0.784399	-0.35034	0.00134071	0.00347556	2.72516	2.72406	2.58785	2.29885	2.46384	2.21367
UTP14A	0.784402	-0.350335	1.09e-07	1.54e-06	6.00501	5.96263	5.99294	5.63127	5.6535	5.62379
ADAM19	0.784653	-0.349874	1.56e-06	1.29e-05	5.93995	6.03668	6.09664	5.67316	5.69043	5.66018
BRIX1	0.784736	-0.349721	1.66e-08	3.36e-07	7.26821	7.26113	7.26907	6.90622	6.90482	6.93822
AC004148.2	0.784988	-0.349258	0.0075824	0.0154348	1.87144	1.64328	1.57886	1.34332	1.34193	1.35672
LRPPRC	0.785232	-0.348809	3.72e-08	6.52e-07	8.90596	8.91118	8.89464	8.54247	8.61296	8.50911
PRPF40B	0.785293	-0.348696	7.02e-05	0.000292	3.3703	3.33499	3.37667	3.00744	3.06951	2.95437
HHAT	0.785313	-0.348661	0.0235092	0.0410041	0.956559	1.33362	1.19635	0.883671	0.68615	0.88777
ZDBF2	0.785434	-0.348437	0.000422	0.00129983	2.66119	2.67736	2.77493	2.3779	2.36733	2.32327
DNAAF3	0.78577	-0.34782	8.38e-07	7.83e-06	5.76133	5.66358	5.67811	5.36014	5.31739	5.38255
ARMC3	0.785189	-0.348888	0.074648	0.112256	0.458233	0.419554	0.0773554	0.275427	-0.260626	-0.082154
PLSCR1	0.78578	-0.347802	5.15e-06	3.39e-05	4.9644	4.88237	4.93195	4.60635	4.50134	4.63097
TMEM173	0.785865	-0.347647	0.000376	0.0011807	3.68388	3.57218	3.65567	3.45487	3.25992	3.16165
MYO18A	0.785894	-0.347593	2.58e-07	3.03e-06	6.40909	6.30524	6.34234	6.00021	6.01614	5.99637
CACHD1	0.785911	-0.347562	6.32e-06	3.97e-05	4.13874	4.14592	4.1216	3.78082	3.82157	3.7593
SRCIN1	0.786168	-0.34709	0.00194703	0.00479734	2.53186	2.43199	2.29411	2.00016	2.0988	2.1109
RMC1	0.786239	-0.34696	5.64e-07	5.71e-06	5.06469	5.1057	5.07991	4.7422	4.73313	4.73492
FAM122B	0.786323	-0.346807	5.91e-07	5.92e-06	6.79709	6.91493	6.9311	6.54161	6.54152	6.52027
EIF3C	0.786387	-0.346688	2.16e-08	4.16e-07	8.7859	8.7894	8.8307	8.49646	8.42474	8.44555
WDR76	0.786427	-0.346614	2.24e-07	2.71e-06	6.04138	5.98759	6.04713	5.67541	5.65203	5.70904
BTBD8	0.786515	-0.346454	0.0249184	0.0431789	1.34332	1.40735	1.00574	0.98447	0.938011	0.798854
TTC21B	0.786545	-0.346398	4.21e-05	0.000191	4.38829	4.36977	4.42129	3.99228	4.17332	3.96555
TTC33	0.786677	-0.346157	2.63e-05	0.000129	4.6411	4.7817	4.74804	4.29128	4.37909	4.46045
DIP2B	0.786825	-0.345885	6.82e-06	4.25e-05	6.74583	6.8738	6.86484	6.42709	6.58488	6.43227
CWF19L2	0.786842	-0.345853	4.55e-05	0.000205	3.59215	3.53122	3.59387	3.27723	3.22916	3.17437
AL138756.1	0.786856	-0.345828	0.00714237	0.0146733	1.6477	1.56441	1.54838	1.29262	1.10559	1.33362
EIF2D	0.786909	-0.345731	4.22e-07	4.54e-06	5.9034	5.8852	5.84922	5.52797	5.49149	5.5823
CTAGE15	0.786913	-0.345725	0.024756	0.0429547	1.54097	1.22532	1.68724	1.09399	1.24909	1.0575
LCA5L	0.786771	-0.345984	0.108856	0.155565	0.119264	0.21914	0.489696	-0.491674	-0.0520824	0.316908
DNAJC28	0.78681	-0.345913	0.068872	0.104584	0.387269	0.114049	0.0773554	-0.0726825	-0.417749	0.0434529
SPRY1	0.787105	-0.345373	0.0103378	0.0201572	1.68142	1.51297	1.73214	1.46795	1.2331	1.19715
ATL3	0.78713	-0.345326	5.39e-07	5.5e-06	6.4082	6.53296	6.48381	6.12459	6.15566	6.10896
ALG6	0.787493	-0.344662	7.82e-06	4.73e-05	4.20183	4.24564	4.17823	3.90449	3.84397	3.84685
ZNF365	0.78753	-0.344593	0.00637255	0.01331	2.05627	2.18283	1.97311	1.90112	1.7138	1.57624
CCDC74B	0.787568	-0.344524	0.0287153	0.0487913	0.467626	0.436854	0.37309	0.00771482	0.0884398	0.144235
SLC17A9	0.787571	-0.344519	1.47e-05	8.02e-05	4.14496	4.04641	4.08051	3.70703	3.77737	3.74901
UQCC1	0.787638	-0.344396	4.46e-07	4.72e-06	5.95511	5.87972	5.87175	5.55637	5.58366	5.53188
CELSR2	0.787807	-0.344086	2.71e-06	2.03e-05	5.50338	5.45753	5.44324	5.12819	5.19417	5.04667
FAM229B	0.787821	-0.34406	0.00105546	0.00282431	2.48436	2.38668	2.3579	2.05692	2.02377	2.11661
C7orf31	0.787866	-0.343978	0.00883848	0.0175758	1.73677	1.53634	1.58863	1.35672	1.33362	1.136
SPATS2L	0.78799	-0.34375	9.04e-08	1.31e-06	6.83888	6.8025	6.86211	6.51878	6.45925	6.49515
NOB1	0.788305	-0.343175	4.38e-08	7.43e-07	7.78117	7.71699	7.74163	7.40658	7.4299	7.37309
CACYBPP2	0.787648	-0.344376	0.17353	0.232534	0.62297	0.963632	1.30997	1.14542	0.694241	0.046891
CELF5	0.7878	-0.344099	0.15097	0.206249	0.0257531	0.043852	0.489696	-0.643082	-0.151121	0.300596
DPM3	0.788341	-0.343109	6.75e-05	0.000282	3.67421	3.66968	3.55272	3.26728	3.26563	3.33499
KIF21B	0.788426	-0.342952	0.000784	0.00219025	2.99469	2.8025	2.85646	2.57945	2.58871	2.45173
SQOR	0.788644	-0.342554	6.15e-05	0.000261	3.90119	3.98657	3.86532	3.58496	3.49754	3.64933
PTPRE	0.788664	-0.342517	0.000124	0.000467	3.75841	3.77219	3.75773	3.34005	3.55306	3.35659
GUCA1B	0.788226	-0.343319	0.0669946	0.102067	0.590485	1.00765	1.17186	0.572292	0.385294	0.798854
ALKBH7	0.788874	-0.342133	0.000228	0.000775	4.01626	3.83092	3.80702	3.56637	3.46027	3.6041
MOSPD1	0.789031	-0.341846	6.95e-07	6.72e-06	5.67811	5.73264	5.76009	5.40767	5.33967	5.4006
KNL1	0.789085	-0.341747	1.61e-05	8.63e-05	6.26601	6.26436	6.36367	5.88165	6.08252	5.8995
PTMAP2	0.788532	-0.342758	0.0568382	0.0884022	1.69477	1.30074	1.60937	1.38635	0.808552	1.40454
GABPB2	0.789118	-0.341687	0.000168	0.000599	3.36862	3.39328	3.47396	2.99377	3.16109	3.04671
GRPEL1	0.789148	-0.341632	6.27e-08	9.8e-07	7.15382	7.14333	7.18097	6.83664	6.77682	6.84088
THG1L	0.78917	-0.341592	8.08e-07	7.61e-06	5.3478	5.35473	5.41453	4.99701	5.05329	5.04002
DOT1L	0.789267	-0.341415	1.56e-07	2.05e-06	6.67407	6.63288	6.60732	6.2623	6.32948	6.29657
LINC02001	0.789664	-0.340689	0.0014929	0.00381392	2.56128	2.46594	2.69622	2.20138	2.21538	2.28146
ENDOD1	0.789835	-0.340377	5.25e-07	5.37e-06	5.72523	5.79883	5.80433	5.45298	5.40967	5.44658
AC015813.6	0.789856	-0.340339	0.000509	0.00152644	3.14891	3.13815	3.31588	2.89909	2.77099	2.91863
OSBPL3	0.789911	-0.340237	3.66e-07	3.99e-06	6.04713	6.09403	6.13067	5.72749	5.78325	5.73912
AC008014.1	1.28938	0.366679	0.038911	0.0635817	0.14634	-0.238537	-0.00725352	0.19958	0.44743	0.335707
TUT1	0.789966	-0.340138	2.06e-06	1.61e-05	5.18307	5.11064	5.08188	4.78188	4.76139	4.812
BAIAP2-DT	0.790004	-0.340069	1.21e-05	6.82e-05	4.04925	4.00706	4.00415	3.69312	3.70444	3.64133
RRM2B	0.790021	-0.340037	4.84e-07	5.02e-06	6.86617	6.99282	6.95211	6.58961	6.62284	6.57861
IRF9	1.28889	0.366133	0.0295787	0.050082	1.41841	1.10302	0.895924	1.7372	1.32184	1.47431
RGS16	0.790227	-0.339661	0.000167	0.000596	3.48833	3.5365	3.56872	3.26372	3.07662	3.24532
MMP25-AS1	1.28866	0.36587	0.0406611	0.06609	0.300469	0.043852	0.532707	0.463302	0.746375	0.746302
MDP1	0.790236	-0.339644	0.00629556	0.0131746	2.21156	2.50061	2.42363	2.1977	2.0336	1.89997
TRA2A	0.790332	-0.339469	1.27e-07	1.74e-06	6.99282	7.02619	7.05538	6.64712	6.68374	6.72461
MICAL3	0.790432	-0.339286	0.000189	0.00066	4.98155	4.97047	4.96291	4.55624	4.81939	4.51068
PARS2	0.790505	-0.339154	0.000123	0.000464	3.6764	3.666	3.79607	3.44575	3.38987	3.28723
FRMD6	0.790679	-0.338835	1.85e-05	9.66e-05	3.85767	3.88395	3.87995	3.51022	3.58225	3.50922
DARS2	0.790757	-0.338693	2.59e-07	3.04e-06	5.99861	5.99481	5.96348	5.65589	5.67722	5.60706
MSH2	0.790783	-0.338647	1.97e-07	2.44e-06	7.12145	7.19276	7.21162	6.82046	6.87363	6.81507
ANKMY1	0.791022	-0.33821	0.000115	0.000437	3.24532	3.26372	3.2485	2.91025	2.85921	2.97708
FASTKD3	0.791123	-0.338026	1.42e-05	7.8e-05	4.27017	4.2817	4.29629	3.93965	4.01552	3.87522
RIT1	0.791149	-0.337978	0.00758295	0.0154348	2.03769	2.28059	2.40188	1.82664	1.89322	1.98732
FKBP10	0.79125	-0.337795	0.00746516	0.0152499	1.73677	1.89766	1.89322	1.34332	1.55206	1.61133
TMEM171	0.791521	-0.3373	0.0124569	0.0236763	1.68142	1.61133	1.52119	1.19707	1.14157	1.46653
SDE2	0.791606	-0.337146	3.91e-07	4.23e-06	5.56042	5.58479	5.55616	5.22527	5.26053	5.20317
ANKRD13A	0.791727	-0.336926	4.86e-06	3.24e-05	4.98881	5.00937	5.02827	4.6787	4.59773	4.74277
DOHH	0.791891	-0.336626	5.2e-06	3.41e-05	5.64806	5.54419	5.55734	5.32034	5.17924	5.24373
MICAL2	0.792105	-0.336236	2.6e-05	0.000128	4.87674	4.93325	5.00913	4.61829	4.68207	4.50769
HK2	0.792209	-0.336047	7.96e-08	1.19e-06	6.81755	6.84871	6.81215	6.49474	6.51617	6.45911
TMEM17	0.792257	-0.335959	0.0246405	0.0427826	1.07971	1.385	1.47249	1.08159	0.938011	0.92163
KIFC3	0.792299	-0.335883	3.61e-05	0.000168	4.35007	4.30496	4.26216	4.0158	3.87065	4.02951
SLC25A33	0.792329	-0.335829	2.56e-06	1.94e-05	6.02606	5.87874	5.94898	5.62466	5.57876	5.64302
MOK	0.792381	-0.335734	0.00284531	0.0066564	2.32634	2.26454	2.28669	2.07213	1.80693	2.00562
HSCB	0.792449	-0.33561	8.03e-05	0.000326	3.58777	3.60564	3.56359	3.28092	3.16547	3.31069
ARMC9	0.792612	-0.335314	8.54e-05	0.000343	3.60564	3.6004	3.54122	3.30862	3.26899	3.16547
WDR35	0.792657	-0.335232	2.56e-05	0.000126	4.26428	4.29605	4.25339	3.83622	3.99641	3.96866
DNTTIP2	0.792695	-0.335163	1.11e-07	1.55e-06	7.35333	7.36547	7.37828	7.03585	7.07574	6.97924
IQCD	0.792719	-0.335119	0.00795348	0.0160885	1.9474	2.30072	2.04291	1.74486	1.77848	1.76827
HIVEP3	0.792741	-0.335079	0.000164	0.000586	3.51413	3.5365	3.4103	3.19054	3.1954	3.06991
AC091057.1	0.792839	-0.334901	0.00447829	0.00979919	2.70462	2.78214	3.00145	2.3638	2.46119	2.65446
ICAM5	0.792931	-0.334733	0.00104778	0.0028078	2.93294	2.75831	2.76478	2.57329	2.45694	2.42462
SYN2	0.793031	-0.334552	6.94e-05	0.000289	3.55568	3.45465	3.48262	3.17794	3.16819	3.1418
MTLN	0.793068	-0.334483	0.000459	0.00139917	3.35219	3.16219	3.21467	2.98447	2.89762	2.84456
DHX30	0.793114	-0.334399	3.01e-07	3.41e-06	8.01447	7.93244	7.91031	7.65153	7.63062	7.57176
PRPF3	0.793174	-0.334291	2.65e-07	3.1e-06	6.14913	6.10126	6.09185	5.80737	5.78089	5.75144
NDUFC2-KCTD14	0.792748	-0.335066	0.136239	0.188676	0.948281	0.718068	1.66343	0.61217	0.824035	0.871273
AC009053.1	0.792803	-0.334965	0.0520276	0.0818089	1.16234	0.961095	0.808552	0.352729	0.676637	0.880587
CPT2	0.793331	-0.334005	7.54e-06	4.6e-05	4.96943	4.85321	4.92711	4.54776	4.63887	4.55589
DERPC	0.793352	-0.333967	0.000243	0.000819	5.4536	5.52077	5.48156	5.14048	5.32674	4.98087
SETD4	0.793434	-0.333818	4.19e-05	0.000191	3.70066	3.7582	3.81514	3.40474	3.42585	3.44166
FGD3	0.79378	-0.333189	0.00245531	0.00585776	3.1037	2.90376	2.8775	2.63543	2.491	2.76444
ZNF493	1.28015	0.356312	0.0387144	0.0633283	0.532453	0.26607	0.512654	0.556036	1.01508	0.781512
ACAD8	0.793873	-0.333019	1.61e-05	8.62e-05	3.90292	3.96561	3.93196	3.59498	3.60705	3.59984
RPL26P30	0.793879	-0.333008	0.00649264	0.0135218	2.31524	2.26806	2.26435	2.12392	2.00812	1.72086
HOXB7	0.793883	-0.333002	2.8e-06	2.09e-05	5.32571	5.36171	5.29855	4.97405	4.94805	5.06647
AC010422.3	0.793925	-0.332925	0.0193346	0.0346078	2.03217	2.09301	1.65022	1.52176	1.64391	1.6073
ZNF852	0.793475	-0.333744	0.123371	0.173454	0.458233	0.782086	0.532707	-0.200996	0.709425	0.227385
C12orf66	0.793934	-0.33291	2.27e-05	0.000114	4.02241	4.04205	4.08909	3.71927	3.77072	3.6622
TMEM92	0.794081	-0.332641	0.0162605	0.0297679	2.05627	2.05627	1.69301	1.55706	1.52844	1.72592
TIGAR	0.7941	-0.332608	9.89e-07	9e-06	5.42674	5.4593	5.37614	5.11125	5.078	5.07667
STXBP1	0.794174	-0.332473	1.4e-06	1.18e-05	5.14188	5.17013	5.20078	4.79775	4.85787	4.85787
C3orf33	0.794262	-0.332312	0.000141	0.000518	3.24068	3.21091	3.31247	2.94759	2.92608	2.89363
PRKAG2	0.794279	-0.332283	1.32e-06	1.13e-05	5.27523	5.28776	5.33239	5.00845	4.92887	4.96402
MRPL32	0.794282	-0.332277	2.98e-07	3.38e-06	6.17793	6.25772	6.2296	5.90567	5.89503	5.86855
TRIM21	0.794399	-0.332065	2.77e-05	0.000135	4.09425	4.10803	4.00913	3.77794	3.75097	3.68784
AC073073.2	1.27801	0.353899	0.0332621	0.0553831	0.832508	0.564759	0.993817	1.10561	1.35464	0.972926
ST3GAL5	0.794443	-0.331984	0.000254	0.00085	3.47035	3.5424	3.3552	3.18227	3.11066	3.08464
NOM1	0.794534	-0.331819	7.09e-07	6.83e-06	6.14897	6.1829	6.21145	5.78662	5.87748	5.88165
XK	0.795365	-0.330312	3.15e-05	0.000151	3.81897	3.91253	3.90859	3.53361	3.56904	3.54614
PIK3CD	0.795412	-0.330226	0.000216	0.000738	3.31902	3.26899	3.27669	3.04323	2.96568	2.86811
CRYBG1	0.795469	-0.330123	3.17e-05	0.000152	5.12346	5.26747	5.15056	4.81214	4.94774	4.78801
ADAM10	0.795656	-0.329783	2.97e-07	3.37e-06	7.12631	7.19927	7.18891	6.80925	6.8927	6.82192
ITCH	0.795716	-0.329675	4.42e-07	4.7e-06	6.78722	6.86837	6.84116	6.46325	6.55302	6.4901
GLB1L2	0.795758	-0.329598	3.08e-07	3.48e-06	5.9587	5.90064	5.92551	5.61753	5.59945	5.57907
PWP2	0.795767	-0.329581	2.92e-07	3.34e-06	6.71824	6.61857	6.67026	6.35011	6.34118	6.32645
UTP15	0.795801	-0.329521	6.09e-07	6.05e-06	6.28334	6.33803	6.37255	6.04017	6.00429	5.96203
URB1	0.795876	-0.329385	7.79e-06	4.72e-05	6.91687	6.88951	6.90186	6.53819	6.69464	6.48362
RASL11A	0.795924	-0.329297	0.00171852	0.00430837	2.88551	2.814	2.99867	2.70378	2.56792	2.44352
MRPS35	0.796155	-0.32888	5.58e-08	8.9e-07	6.98471	6.97893	6.94858	6.63651	6.63069	6.65853
MAP7D3	0.796199	-0.328798	6.4e-06	4.02e-05	5.06919	4.95692	5.04461	4.64441	4.70571	4.7305
AQR	0.79625	-0.328706	9.84e-08	1.41e-06	6.72615	6.69391	6.7082	6.37675	6.40872	6.35571
AASS	0.796345	-0.328535	0.00117233	0.00309728	2.45694	2.5928	2.46854	2.16729	2.17312	2.19509
AC020916.1	0.796372	-0.328486	0.0130597	0.0246423	2.19456	1.9738	1.95155	1.50888	1.72318	1.88745
MSL3P1	0.79645	-0.328344	2.31e-05	0.000116	4.56401	4.68748	4.59257	4.36216	4.26088	4.24201
FOXO6	0.796467	-0.328313	0.00413538	0.00915932	2.43978	2.24627	2.30404	1.90887	1.94857	2.14243
STAG3L1	0.796113	-0.328954	0.0810838	0.120577	0.282161	-0.17026	0.13952	-0.187338	-0.168553	-0.388767
MYEOV	0.796829	-0.327658	1.11e-07	1.56e-06	6.27989	6.28622	6.29993	5.97155	5.94585	5.96633
AC022149.1	0.796836	-0.327645	0.00293496	0.00684578	4.024	4.00759	4.25539	3.86976	3.55677	3.89208
ITPRIP	0.7969	-0.327529	5.74e-06	3.69e-05	4.48228	4.49518	4.5462	4.20552	4.18235	4.15414
RASSF5	0.79706	-0.327239	0.000262	0.000873	3.19028	3.15228	3.10225	2.85851	2.85626	2.74754
TMEM191A	0.797077	-0.32721	0.00322147	0.00741172	1.92917	1.97655	1.95578	1.5655	1.64551	1.6657
AL354707.1	1.27274	0.347942	0.0480144	0.0762159	-0.232597	-0.1301	0.199247	0.335707	0.270364	0.277739
TMEM216	0.797443	-0.326547	1e-05	5.8e-05	4.24564	4.23572	4.24265	3.96189	3.88262	3.90332
CDKN2AIPNL	0.797685	-0.326108	7.78e-06	4.72e-05	5.70913	5.62153	5.64274	5.39102	5.23917	5.36898
NVL	0.797722	-0.326042	1.48e-05	8.04e-05	4.73185	4.64889	4.70402	4.39908	4.41808	4.28714
SRF	0.797737	-0.326015	1.91e-07	2.37e-06	6.41014	6.37626	6.37691	6.07777	6.0275	6.08095
HOXA1	0.79775	-0.325991	0.00222464	0.00538452	2.18969	2.18591	2.16495	1.93264	1.78897	1.84911
RAD51C	0.79827	-0.325051	2.01e-07	2.49e-06	6.2448	6.28187	6.2895	5.95141	5.92382	5.96674
PLEKHA2	0.798285	-0.325025	3.14e-06	2.28e-05	5.47076	5.56378	5.50793	5.14858	5.24875	5.16769
RBL1	0.798305	-0.324988	2.08e-06	1.63e-05	5.01386	5.05445	5.06919	4.7422	4.73716	4.68364
C6orf223	0.798344	-0.324918	0.00198412	0.00487941	2.62871	2.64427	2.85272	2.44712	2.36267	2.34524
ZBTB8OS	0.798372	-0.324866	1.21e-05	6.81e-05	4.58318	4.65197	4.63066	4.27398	4.2493	4.37017
EBNA1BP2	0.798373	-0.324865	9.68e-08	1.39e-06	7.71152	7.66212	7.73157	7.40188	7.34678	7.38251
OGFOD2	0.7984	-0.324816	0.000382	0.00119631	3.77003	3.76315	3.81955	3.58612	3.49219	3.30378
KIF18B	0.798417	-0.324786	1.42e-06	1.2e-05	6.38541	6.29201	6.2991	5.99294	6.05199	5.95511
NR1D2	0.798437	-0.324749	2.03e-06	1.6e-05	6.82866	6.96171	6.97027	6.56792	6.61337	6.60498
CEP19	0.798468	-0.324694	0.00430987	0.00949176	2.16554	2.15268	2.12637	1.7849	1.96871	1.70564
AGK	0.798474	-0.324682	2.29e-06	1.77e-05	5.67282	5.5693	5.57027	5.30389	5.25128	5.28395
DAZAP1	0.798521	-0.324598	3.16e-07	3.55e-06	7.54681	7.49085	7.47204	7.21967	7.12631	7.19127
ICAM3	0.798532	-0.324578	0.000877	0.00241698	2.57867	2.5057	2.53275	2.20682	2.24665	2.18591
CDK5RAP1	0.798772	-0.324145	4.61e-07	4.84e-06	5.79633	5.80878	5.79869	5.48772	5.43743	5.50793
DOC2A	0.799039	-0.323662	0.0158579	0.0291497	1.55604	1.6738	1.88484	1.26809	1.3919	1.47909
MCUR1	0.799172	-0.323423	1.27e-06	1.1e-05	5.96071	6.03407	6.03465	5.68864	5.63915	5.73342
LIMCH1	0.799327	-0.323143	0.000474	0.00143837	3.06538	3.16842	3.12968	2.81547	2.87462	2.70199
DYNLL2	0.799496	-0.322838	1.06e-07	1.51e-06	8.52571	8.59235	8.61985	8.23144	8.26518	8.27258
ZNF280B	0.799794	-0.322299	0.000779	0.0021792	3.07635	2.99898	3.22175	2.77514	2.75427	2.79991
C21orf59-TCP10L	0.799826	-0.322243	0.000142	0.000522	3.94285	4.1132	3.99228	3.68558	3.63289	3.769
UBE2S	0.799885	-0.322136	6.28e-06	3.95e-05	9.16079	8.97248	9.017	8.73652	8.67468	8.77272
KDM4D	0.799893	-0.322121	0.00846334	0.0169618	2.11078	2.22678	2.26478	2.02227	1.94857	1.67005
RAPGEF5	0.800026	-0.321881	0.000622	0.00180289	4.18985	4.34006	4.37056	4.08888	4.0352	3.8146
LRTOMT	0.800198	-0.321572	0.00648768	0.0135137	2.14915	1.98741	2.20845	1.66778	1.8726	1.82463
SETD9	0.800329	-0.321334	0.00964602	0.0189817	2.40277	2.60403	2.76478	2.40509	2.12257	2.29966
NKX6-1	0.800349	-0.321299	0.00314207	0.00725465	2.81855	2.85851	2.79346	2.46074	2.69329	2.33933
SDHB	0.80064	-0.320774	5.29e-07	5.41e-06	7.13697	7.05087	7.05172	6.77099	6.71641	6.79051
PIK3R4	0.800687	-0.320689	5.06e-06	3.34e-05	5.8626	5.83578	5.89503	5.50717	5.63494	5.48494
ZCCHC8	0.800753	-0.320571	4.67e-06	3.14e-05	5.0885	5.0041	5.10347	4.7508	4.76882	4.7128
RPL13AP5	0.800873	-0.320354	0.00296908	0.00691777	3.79712	4.01298	3.79446	3.71752	3.35571	3.59285
AL359504.2	1.26713	0.341559	0.0444886	0.0713142	0.14634	-0.143806	0.276133	0.415575	0.469852	0.409593
PTGES3P1	0.800081	-0.321781	0.176912	0.236239	-0.0371778	0.404603	0.3211	-0.673843	0.174914	0.192912
TXNRD1	0.800917	-0.320275	1.33e-06	1.13e-05	9.11796	9.26224	9.23132	8.88025	8.92931	8.84107
NOP2	0.801085	-0.319972	2.75e-06	2.05e-05	7.48453	7.34352	7.41471	7.10977	7.14028	7.03145
CCDC57	0.801365	-0.319469	4.9e-05	0.000217	4.96269	4.89454	4.7672	4.58104	4.50499	4.58267
ERCC6L	0.801405	-0.319396	3e-06	2.2e-05	5.74259	5.79782	5.84286	5.4182	5.5242	5.47986
ULK2	0.801474	-0.319273	0.000775	0.00217174	2.88551	2.98478	2.88809	2.63543	2.66098	2.50431
FAM114A2	0.801711	-0.318846	3.73e-05	0.000173	4.49952	4.41119	4.54317	4.12793	4.23287	4.1302
TAF15	0.801824	-0.318642	1.84e-07	2.31e-06	8.68351	8.68351	8.73895	8.32634	8.39809	8.42474
COA6	0.801926	-0.318459	2.47e-05	0.000123	4.61625	4.64889	4.6602	4.30251	4.25107	4.41932
CENPX	0.801969	-0.318381	5.34e-06	3.48e-05	7.18279	7.04232	7.05693	6.79914	6.70865	6.82022
RAB27B	0.802051	-0.318234	0.00165844	0.00417251	2.68543	2.91087	2.7989	2.54895	2.44106	2.46119
CENPE	0.802086	-0.318171	0.000343	0.00109709	5.48646	5.5769	5.64493	5.14739	5.42591	5.17189
B3GAT3	0.802377	-0.317648	1.84e-05	9.6e-05	5.09653	5.03533	4.98486	4.75556	4.63887	4.77338
ZNF507	0.802501	-0.317424	8.95e-06	5.3e-05	5.71389	5.76973	5.81132	5.3835	5.53517	5.41968
ZNF185	0.802528	-0.317377	1.59e-05	8.55e-05	4.31616	4.38749	4.40705	4.0182	4.08075	4.05776
ELMSAN1	0.80254	-0.317354	5.13e-06	3.37e-05	5.51644	5.43087	5.50717	5.15084	5.23119	5.11658
POLR3G	0.802695	-0.317077	4.87e-07	5.05e-06	6.45767	6.52262	6.52986	6.15415	6.21756	6.18626
ADAM9	0.802722	-0.317028	6.97e-06	4.32e-05	7.71272	7.87774	7.88308	7.46972	7.54898	7.50336
LOXL3	0.80283	-0.316834	0.00154085	0.00391721	2.65446	2.84191	2.7989	2.50307	2.37816	2.47449
NOL7	0.802847	-0.316803	1.09e-06	9.72e-06	6.88437	6.84648	6.84241	6.53601	6.47738	6.61058
C2CD3	0.802906	-0.316697	2.94e-06	2.16e-05	5.52246	5.54581	5.5368	5.26198	5.25043	5.14295
CYBB	0.80246	-0.317498	0.0894888	0.131538	0.668218	0.782086	1.03249	0.593481	0.782745	0.144235
SPACA9	0.802931	-0.316653	0.0218355	0.0384608	1.22993	1.39431	1.354	0.997135	0.864828	1.17695
CEP295	0.803091	-0.316364	0.000967	0.00262501	4.28423	4.35403	4.27017	3.91289	4.18853	3.84591
TEC	0.80315	-0.316258	0.0031509	0.00726731	2.40277	2.5501	2.58785	2.18249	2.10988	2.30716
LZTR1	0.803181	-0.316203	1.05e-05	6.04e-05	4.79621	4.69405	4.68355	4.39908	4.41051	4.41391
CDC6	0.803529	-0.315578	6.37e-08	9.93e-07	7.63776	7.66428	7.60575	7.30803	7.32999	7.32286
METTL5	0.803554	-0.315534	3.57e-06	2.54e-05	5.79212	5.72236	5.74931	5.41925	5.38645	5.51202
HFE	0.803654	-0.315353	2.06e-05	0.000106	4.16157	4.15396	4.10654	3.81879	3.7941	3.86449
LSM6	0.803673	-0.31532	6.45e-06	4.05e-05	5.39653	5.53299	5.44992	5.10581	5.16333	5.16395
STK11IP	0.80371	-0.315253	0.000145	0.00053	3.7098	3.87403	3.76544	3.46488	3.50453	3.43478
CCDC32	0.803819	-0.315057	6.04e-05	0.000258	3.96584	3.96338	4.0352	3.68425	3.73065	3.60149
CRLF3	0.804297	-0.3142	8.61e-07	8.02e-06	5.71174	5.77146	5.77774	5.4429	5.41946	5.45725
ABHD14B	0.804299	-0.314196	3.86e-06	2.69e-05	5.27306	5.29855	5.194	4.93376	4.96352	4.92513
PLPPR4	0.803501	-0.315628	0.1044	0.150169	0.321979	0.69817	0.872104	0.625893	0.172145	0.173055
SNTB1	0.80441	-0.313998	0.000615	0.00178837	2.7828	2.87035	2.82894	2.47272	2.51561	2.55135
DDTL	0.804516	-0.313807	0.0184452	0.0332396	1.55861	1.54536	1.3992	1.04977	1.15387	1.354
ID2	0.804642	-0.313582	6.27e-07	6.18e-06	6.44288	6.42766	6.37552	6.12673	6.05856	6.12157
YBX3	0.804644	-0.313577	2.86e-08	5.2e-07	8.56359	8.58353	8.57813	8.24413	8.24816	8.29228
GTF2H3	0.804732	-0.31342	1.45e-06	1.23e-05	6.41265	6.46872	6.47672	6.11913	6.20417	6.09297
ABCD3	0.804774	-0.313344	9.68e-08	1.39e-06	6.79466	6.77882	6.7785	6.47527	6.48288	6.4535
POC1B-GALNT4	0.804269	-0.314249	0.25073	0.319144	1.9209	1.47228	2.60185	1.2147	2.13699	1.63628
PARP9	0.804809	-0.313282	9.19e-05	0.000365	3.76484	3.76489	3.87048	3.49117	3.52523	3.44166
ABT1	0.804867	-0.313177	1.27e-06	1.1e-05	6.08272	5.97847	6.02219	5.71772	5.69312	5.73288
OSGEPL1	0.804946	-0.313037	0.000895	0.00245459	3.24934	3.25992	3.38496	2.84798	3.05502	3.04053
M1AP	0.804987	-0.312963	5.9e-06	3.77e-05	4.96269	4.92698	4.9049	4.5655	4.66404	4.62192
E2F4	0.805238	-0.312513	1.16e-07	1.62e-06	6.91527	6.89661	6.88675	6.60919	6.56388	6.58887
FAM3C	0.805313	-0.312379	3.31e-06	2.38e-05	8.57267	8.73652	8.73436	8.35673	8.37198	8.37812
MOSPD2	0.80538	-0.312259	0.000298	0.000972	3.5304	3.70444	3.68669	3.38034	3.28957	3.32241
AP3M2	0.805588	-0.311886	0.000199	0.000692	4.08613	4.29605	4.21386	3.90798	3.92979	3.82459
SCARF2	1.26087	0.334422	0.0454837	0.0727393	0.550974	0.525395	0.424993	0.746652	1.10559	0.63355
ARHGDIB	0.80561	-0.311847	0.022744	0.0398886	1.22993	1.39431	1.20978	1.01258	1.06212	0.824035
MDM1	0.805622	-0.311826	0.00165855	0.00417251	3.41766	3.65472	3.65875	3.15229	3.35906	3.27723
TRIM6	0.805655	-0.311766	0.000135	0.000499	3.47304	3.57502	3.53383	3.19411	3.25709	3.19373
GNL2	0.805711	-0.311666	1.39e-07	1.86e-06	7.39625	7.3352	7.346	7.0243	7.04906	7.06835
RANGRF	0.805749	-0.311598	5.16e-05	0.000226	4.85237	4.76145	4.82848	4.58942	4.39897	4.52579
C9orf72	0.805756	-0.311585	0.000514	0.00153889	3.27467	3.41075	3.23993	3.05502	2.99005	2.95185
NPHP1	0.805784	-0.311535	0.000477	0.00144263	3.00393	2.94659	2.97248	2.72968	2.61847	2.64532
TIMP2	0.805804	-0.311499	4.12e-07	4.44e-06	6.28814	6.30607	6.31194	5.96335	5.97396	6.03425
ELF3-AS1	0.806014	-0.311123	0.0178382	0.0322484	1.52247	1.36814	1.34028	1.22303	1.01508	1.06721
RGPD8	0.806215	-0.310764	0.00482142	0.0104523	2.7581	2.77324	2.92814	2.39667	2.6958	2.41674
BTN2A2	0.806266	-0.310672	0.00156527	0.00396922	3.15149	3.19373	3.31855	2.97983	2.76753	2.99723
FARS2	0.806338	-0.310544	0.00051	0.00152817	3.77252	3.77005	3.57196	3.43147	3.33269	3.42465
MTG2	0.806492	-0.310268	2.2e-05	0.000111	5.12712	5.17779	5.14825	4.93628	4.75034	4.84309
DGKA	0.806607	-0.310061	2.35e-05	0.000117	4.19644	4.10969	4.15674	3.83622	3.84097	3.85391
FLYWCH2	0.806837	-0.309651	2.08e-05	0.000107	4.33411	4.29362	4.34331	4.07479	3.98409	3.98652
METAP1D	0.806853	-0.309623	7.42e-05	0.000306	3.97723	3.90292	3.92944	3.55629	3.68784	3.62887
MELTF	0.806886	-0.309563	7.63e-05	0.000314	4.99816	4.85579	4.79449	4.608	4.58518	4.52579
CCDC110	0.805829	-0.311454	0.0502985	0.0794255	1.4831	1.09701	1.19635	0.783458	1.16804	0.86389
ANKRD42	0.806904	-0.30953	0.000285	0.000937	3.52867	3.61176	3.61289	3.32503	3.33152	3.16865
INTS14	0.807006	-0.309349	3.59e-07	3.93e-06	6.39642	6.38654	6.33342	6.07229	6.06626	6.0499
RRP12	0.807039	-0.309289	6.07e-07	6.04e-06	7.09678	7.04541	7.0715	6.76814	6.81146	6.70494
RTL5	0.807121	-0.309144	0.00725859	0.0148862	2.49535	2.41753	2.20632	2.01226	2.1578	2.01226
AHSA2P	1.25675	0.329703	0.0317078	0.0531824	1.0635	1.24137	1.48291	1.35672	1.69877	1.70564
MPV17L2	0.807233	-0.308942	1.66e-05	8.85e-05	5.3704	5.25982	5.233	5.0242	4.92482	4.98978
DNA2	0.807341	-0.308749	8.43e-05	0.000339	4.35603	4.4886	4.44727	4.0515	4.20629	4.10273
SMCHD1	0.807493	-0.308478	8.39e-05	0.000338	6.9278	7.09377	7.06315	6.66714	6.84648	6.64285
NGEF	0.807502	-0.308462	0.0196394	0.035075	1.46426	1.72496	1.75731	1.26809	1.30634	1.45
HSD11B1L	0.807503	-0.308461	0.01812	0.0327262	1.24018	1.33362	1.42168	1.12143	0.983725	0.972926
PLEKHH2	0.807553	-0.308372	0.000571	0.00168102	3.07277	3.19932	3.12968	2.82901	2.88809	2.75829
NAAA	0.807667	-0.308168	8.51e-05	0.000342	3.65567	3.74149	3.65567	3.36251	3.37762	3.38915
TCERG1	0.807716	-0.30808	4.29e-07	4.59e-06	7.12392	7.1601	7.14219	6.81659	6.89075	6.79331
SAMD4A	0.80786	-0.307822	0.000981	0.00265554	2.93294	2.89089	2.99034	2.61483	2.72145	2.54672
ZNF850	0.807861	-0.307821	0.00645635	0.013457	1.96742	2.06407	2.13932	1.67453	1.72318	1.84911
IRF3	0.808163	-0.307281	7.43e-06	4.56e-05	5.48427	5.36101	5.36526	5.1164	5.0872	5.0848
DLST	0.80825	-0.307127	1.37e-07	1.85e-06	7.03074	7.05982	7.00401	6.73131	6.72699	6.71521
THEM4	0.808343	-0.30696	1.24e-05	6.96e-05	5.18898	5.20078	5.06823	4.84881	4.82616	4.86343
TFRC	0.808442	-0.306785	1.33e-06	1.13e-05	9.12331	9.24283	9.24868	8.90207	8.93713	8.85524
GPR160	0.808573	-0.30655	0.000301	0.000982	3.61289	3.666	3.48704	3.26372	3.31141	3.26999
FAM92A	0.808625	-0.306458	2.5e-07	2.97e-06	6.7982	6.74147	6.77477	6.48288	6.44084	6.47183
SAV1	0.808657	-0.3064	7.93e-07	7.48e-06	5.78557	5.81463	5.85302	5.51671	5.51252	5.50508
CXCL16	0.808721	-0.306286	2.19e-06	1.7e-05	5.35668	5.3839	5.3556	5.06293	5.01737	5.09906
PITX3	0.808726	-0.306277	0.0241804	0.0420622	1.53426	1.2331	1.43098	1.17936	1.07885	1.01996
IMPA1	0.808728	-0.306274	1.91e-07	2.38e-06	6.47543	6.46729	6.49116	6.18686	6.15705	6.17172
ENDOV	0.808884	-0.305995	0.000113	0.000433	4.00913	3.86907	3.89931	3.64982	3.57785	3.63331
PRPSAP2	0.80898	-0.305824	8.7e-06	5.17e-05	5.56121	5.52201	5.48624	5.27583	5.13876	5.24168
KIF13B	0.808983	-0.30582	3.6e-05	0.000168	3.99483	4.07452	4.0292	3.75533	3.71878	3.71001
DDX47	0.80902	-0.305752	6.67e-08	1.02e-06	7.30168	7.29279	7.28235	6.99089	6.99594	6.97261
METTL17	0.809172	-0.305481	1.75e-05	9.24e-05	5.60546	5.5315	5.49568	5.27104	5.15326	5.29527
DIPK1B	0.809262	-0.305321	0.000383	0.00119871	3.72584	3.57218	3.63542	3.32372	3.26728	3.42721
WDR83	0.809518	-0.304866	0.000324	0.00104416	3.76484	3.60564	3.6078	3.36251	3.39543	3.30118
RFLNB	0.809573	-0.304767	6.92e-07	6.7e-06	5.76643	5.74585	5.74731	5.47426	5.42674	5.44556
PALD1	0.809609	-0.304704	7.63e-07	7.25e-06	5.67012	5.69654	5.65532	5.38	5.37231	5.35608
MEMO1	0.809829	-0.30431	9.9e-07	9e-06	5.80756	5.75325	5.80674	5.47067	5.47438	5.50897
NPNT	0.81007	-0.303881	7.04e-05	0.000293	4.215	4.32587	4.37446	3.97149	4.00727	4.02479
KAZN	0.810161	-0.30372	3.05e-05	0.000147	4.67886	4.70985	4.65106	4.36862	4.45599	4.30051
SOCS3	0.810236	-0.303587	0.000733	0.0020732	3.6764	3.57502	3.64701	3.33348	3.45174	3.19373
SCN1B	0.810496	-0.303123	0.0193556	0.0346312	1.52247	1.49223	1.77904	1.34332	1.27252	1.27045
TRIML2	0.810584	-0.302966	0.00141282	0.00363643	2.87187	2.89466	2.92126	2.72968	2.53933	2.52061
UBE2H	0.811239	-0.301801	2.4e-07	2.87e-06	7.71564	7.78634	7.74811	7.42429	7.48381	7.43606
LYAR	0.811267	-0.301752	1.87e-07	2.34e-06	7.11649	7.1006	7.13354	6.82348	6.78212	6.84051
NIP7	0.811289	-0.301713	1.51e-07	2e-06	7.23756	7.27271	7.27156	6.97787	6.96967	6.92945
CSTF2	0.811318	-0.301661	6.06e-07	6.03e-06	6.01283	6.0046	6.01366	5.74366	5.70146	5.68201
ASCC1	0.811351	-0.301602	8.26e-06	4.96e-05	5.35059	5.2665	5.32228	4.94612	5.03265	5.05194
UTP11	0.811374	-0.301562	1.18e-06	1.04e-05	6.60686	6.616	6.5903	6.26098	6.27736	6.37
DHX57	0.811379	-0.301553	3.75e-05	0.000174	5.7154	5.65733	5.65923	5.37733	5.47927	5.26663
PPCDC	0.811531	-0.301282	0.000133	0.000493	3.54009	3.5424	3.48262	3.23968	3.23543	3.18644
GPR39	0.811545	-0.301257	0.0240465	0.0418628	2.38575	2.21844	1.98745	2.01226	1.72318	1.96708
NAB2	0.811555	-0.301239	3.98e-06	2.76e-05	5.84745	5.85006	5.74731	5.54168	5.48156	5.51989
EIF3D	0.811617	-0.30113	1.23e-07	1.7e-06	8.24413	8.21761	8.17941	7.94206	7.89945	7.89673
IRF1	0.811951	-0.300536	4.38e-05	0.000198	4.24564	4.15831	4.13306	3.88919	3.87065	3.87522
KCNH3	0.812091	-0.300286	5.05e-06	3.34e-05	6.12729	5.99777	6.01054	5.76711	5.73358	5.73394
TGIF1	0.812131	-0.300216	1.37e-07	1.85e-06	6.94975	6.93061	6.92223	6.62686	6.6252	6.64985
GNAI1	0.812166	-0.300154	1.04e-07	1.48e-06	7.69993	7.71515	7.66267	7.40987	7.38069	7.38727
GDPD1	0.812169	-0.300148	0.000573	0.00168613	3.41376	3.38616	3.33207	3.05921	2.99005	3.18644
LY6G5C	0.811497	-0.301343	0.12887	0.179962	0.741786	0.21914	0.648485	0.366336	-0.0771319	0.427822
RCL1	0.812531	-0.299505	5.48e-06	3.55e-05	5.40158	5.32851	5.40927	5.10157	5.10558	5.03249
AP002360.1	0.812539	-0.29949	0.00962153	0.0189421	2.17917	2.41201	2.1913	2.0972	1.90894	1.89351
B3GALT1	1.25087	0.322934	0.0340052	0.0564832	0.911205	0.926526	0.532707	1.02637	1.14157	1.16731
CDH22	0.812547	-0.299477	0.0128799	0.0243453	1.87144	1.69303	1.63828	1.40555	1.45327	1.43989
LRRC75A	0.811778	-0.300843	0.168169	0.226187	0.0918174	0.189675	0.614081	-0.313944	-0.109631	0.409593
MYC	0.812611	-0.299363	5.76e-08	9.13e-07	9.17217	9.13832	9.10289	8.8515	8.8307	8.83322
EEF2	0.812673	-0.299252	6.79e-08	1.04e-06	12.2032	12.2032	12.2032	11.8725	11.9661	11.8725
MIR4697HG	0.812771	-0.29908	0.0137396	0.025761	1.65812	1.62746	1.67724	1.21052	1.385	1.46073
DIXDC1	0.812834	-0.298967	0.000283	0.000932	3.66217	3.65641	3.74884	3.45796	3.4181	3.29558
SERTAD3	0.812866	-0.29891	1.62e-05	8.7e-05	4.45396	4.40395	4.3985	4.14553	4.09226	4.12363
CABLES1	0.812913	-0.298827	2.34e-05	0.000117	4.41051	4.44612	4.46626	4.12997	4.19598	4.09777
POMK	0.812921	-0.298814	0.00441374	0.00968452	3.05561	3.25992	3.11697	2.78286	3.02146	2.72156
TIPRL	0.812939	-0.298781	5.83e-06	3.72e-05	6.11462	6.22497	6.12685	5.91506	5.82268	5.83563
PHLDA2	0.813025	-0.298628	1.2e-05	6.79e-05	7.5664	7.41884	7.4333	7.23051	7.10708	7.18647
HYPK	0.81257	-0.299436	0.0706707	0.106954	2.54699	2.26678	2.41083	1.6342	2.29885	2.3503
SF3B5	0.813069	-0.298551	2.32e-06	1.79e-05	6.47905	6.41522	6.4061	6.177	6.07515	6.15443
SAMD8	0.813069	-0.29855	9.39e-06	5.52e-05	5.04307	5.11369	5.14948	4.78871	4.83842	4.78227
PLRG1	0.813177	-0.298359	2.28e-07	2.75e-06	6.94361	6.89457	6.94043	6.62609	6.61451	6.64285
POLE2	0.813181	-0.298351	3.42e-05	0.000161	4.93801	4.83619	4.79564	4.60241	4.55819	4.51469
RBP1	0.813223	-0.298277	6.74e-06	4.2e-05	5.67564	5.63954	5.7052	5.43164	5.30364	5.39392
AFG3L1P	0.813276	-0.298182	9.79e-05	0.000384	4.00445	4.08834	4.15396	3.75985	3.78082	3.8117
POLR3F	0.813296	-0.298148	4.08e-06	2.82e-05	4.85827	4.84949	4.84518	4.54776	4.56956	4.54015
SLC35D2	0.813309	-0.298124	4.7e-05	0.00021	4.58622	4.51817	4.4754	4.30072	4.1923	4.19621
CENPU	0.813356	-0.29804	4.26e-06	2.92e-05	5.41601	5.40224	5.46795	5.1118	5.0997	5.18084
TADA2A	0.813361	-0.298033	8.2e-05	0.000332	4.16157	4.2874	4.16656	3.9152	3.94023	3.86685
GCNT1	0.813375	-0.298008	0.000138	0.00051	3.75994	3.87403	3.88336	3.55629	3.56284	3.50539
RNF135	0.813442	-0.297889	0.00328731	0.00754322	3.50539	3.32958	3.38366	3.17794	2.924	3.23443
AC112220.2	1.24677	0.318191	0.0302646	0.0511238	0.614081	0.513784	0.785463	0.883671	0.913634	1.06721
CAB39	0.813534	-0.297725	2.6e-06	1.96e-05	6.79	6.91098	6.85842	6.51323	6.59227	6.55992
TSTA3	0.813579	-0.297647	1.31e-06	1.13e-05	6.57534	6.46962	6.50183	6.23256	6.20551	6.21558
OPA1	0.813663	-0.297496	6.22e-07	6.14e-06	6.94043	6.99339	7.03856	6.68081	6.69557	6.70348
MED13L	0.813759	-0.297326	9.12e-06	5.38e-05	7.49051	7.57154	7.56447	7.20758	7.34464	7.18041
HYLS1	0.814118	-0.296691	2.67e-05	0.000131	4.74441	4.70571	4.74441	4.41993	4.37158	4.51469
ARPC3	0.814125	-0.296677	2.37e-06	1.82e-05	6.78212	6.67442	6.70666	6.4082	6.39342	6.47118
GRTP1	0.814146	-0.29664	0.000274	0.000908	3.54855	3.68706	3.59762	3.36596	3.31247	3.26999
POLR1C	0.814157	-0.296622	1.23e-06	1.07e-05	6.24118	6.17863	6.16951	5.91264	5.86712	5.92045
MTIF2	0.814162	-0.296612	5.83e-06	3.73e-05	6.3808	6.4766	6.53073	6.15159	6.15097	6.19638
RNF139-AS1	0.813511	-0.297766	0.279887	0.351789	0.22331	-0.753529	0.304973	-0.540872	-0.151121	-0.461295
ACTR5	0.81432	-0.296332	1.27e-05	7.08e-05	4.65921	4.63034	4.60136	4.37056	4.33409	4.29842
FASN	0.814451	-0.2961	2.74e-05	0.000134	11.2854	11.1675	11.0635	10.8896	10.9241	10.8138
MPP1	0.814464	-0.296078	0.000354	0.00112361	3.43782	3.32958	3.44598	3.14632	3.06769	3.11325
E2F8	0.814643	-0.295759	4.03e-06	2.79e-05	5.35385	5.44992	5.40407	5.09462	5.12138	5.10471
EEF1B2P6	0.813764	-0.297317	0.0975147	0.141799	0.802319	0.872104	0.396268	0.614854	0.234665	0.349484
PPP1R15A	0.814721	-0.295622	9.32e-07	8.54e-06	6.14976	6.18733	6.20396	5.87859	5.85733	5.91912
LAS1L	0.814735	-0.295597	6.22e-07	6.14e-06	6.45459	6.38758	6.41306	6.10126	6.13164	6.13438
AURKA	0.814779	-0.295519	9.1e-07	8.38e-06	7.21719	7.13986	7.22923	6.88907	6.87397	6.93653
BORCS8-MEF2B	0.814828	-0.295432	0.0130892	0.0246907	3.4826	3.18061	3.00492	2.91722	2.94995	2.908
RPUSD2	0.814848	-0.295397	1.58e-05	8.49e-05	5.22395	5.1186	5.10157	4.87674	4.86407	4.81635
PRKG1	0.814271	-0.296419	0.113495	0.161187	0.345189	0.114049	0.25473	-0.395113	0.172145	0.0189062
P2RX4	0.814913	-0.295283	0.0025023	0.0059493	2.97695	2.80802	2.91373	2.68729	2.63966	2.48436
IMP4	0.814933	-0.295247	3.34e-07	3.72e-06	7.52059	7.44521	7.46873	7.20332	7.15603	7.18986
TACC1	0.81495	-0.295216	1.46e-06	1.23e-05	6.58152	6.65653	6.65718	6.29108	6.34954	6.36829
MNAT1	0.814961	-0.295196	4.72e-06	3.17e-05	5.03009	5.09085	5.07412	4.74368	4.78474	4.78026
PUS7	0.815038	-0.295061	1.19e-06	1.04e-05	6.56345	6.55368	6.63419	6.29108	6.31863	6.25561
PCID2	0.815101	-0.294949	2.28e-06	1.76e-05	6.11516	6.10616	6.01627	5.79611	5.78739	5.7695
CLP1	0.815122	-0.294913	4.31e-05	0.000195	5.08543	5.01281	4.9049	4.70559	4.70271	4.70966
HIST3H2A	0.815217	-0.294743	0.00125034	0.00326924	3.6764	3.45174	3.65567	3.3515	3.22346	3.32727
BOLA2-SMG1P6	0.815255	-0.294677	2.23e-06	1.73e-05	5.55342	5.51202	5.568	5.28282	5.22989	5.23788
MTERF1	0.815304	-0.29459	5.88e-05	0.000252	4.32587	4.41579	4.31502	4.1216	4.02748	4.02951
FOXD1	0.815352	-0.294505	0.00103306	0.00277751	4.51507	4.24751	4.31252	3.9946	4.0352	4.15645
FGD5-AS1	0.81552	-0.294208	1.08e-06	9.65e-06	6.2317	6.31004	6.25389	5.95513	5.99399	5.96357
FAM210A	0.815621	-0.294029	3.4e-06	2.43e-05	5.83676	5.90344	5.92958	5.62379	5.6104	5.55431
RAP1GAP2	0.815657	-0.293966	2.19e-06	1.7e-05	6.64487	6.6752	6.60181	6.34849	6.39966	6.29094
LINC01719	0.815068	-0.295008	0.0552815	0.0863521	1.21052	1.48591	1.26355	0.760371	1.06415	1.24194
C11orf74	0.815777	-0.293753	0.00226789	0.00547293	3.24934	3.16842	3.29598	2.77135	3.04053	3.00393
FAU	0.815832	-0.293655	2.97e-06	2.18e-05	8.67468	8.54862	8.55733	8.35176	8.262	8.28657
WDR74	0.815842	-0.293639	1.13e-06	1.01e-05	6.86401	6.76861	6.77751	6.51617	6.49036	6.52262
COX17	0.815876	-0.293578	9.32e-06	5.48e-05	5.15954	5.07928	5.11259	4.86277	4.77645	4.83368
EPM2A	0.816058	-0.293256	0.00784847	0.0159032	2.31243	2.58026	2.41412	2.24231	2.13235	2.06395
YBEY	0.816063	-0.293248	0.000212	0.000728	4.00745	3.96338	4.0161	3.78356	3.73304	3.59168
GATM	0.815507	-0.294231	0.0697611	0.105725	0.36954	0.330615	0.614081	0.0911345	0.248402	0.0830467
NAA20	0.816072	-0.293232	5.42e-07	5.52e-06	6.55173	6.52597	6.57437	6.2594	6.22851	6.28493
BRMS1	0.816761	-0.292015	3.5e-07	3.86e-06	6.57745	6.54682	6.53235	6.25589	6.25397	6.27059
NOL9	0.816805	-0.291936	0.000263	0.000875	6.06803	5.8748	5.93269	5.57848	5.62585	5.79273
LINC01806	0.816837	-0.291879	0.00054	0.00160754	3.09712	3.09255	3.09791	2.86409	2.80333	2.74754
DAPK1	0.817111	-0.291397	0.000314	0.00101673	3.83557	3.84824	3.79607	3.42465	3.54499	3.6308
SLIRP	0.817163	-0.291305	8.4e-06	5.02e-05	6.2326	6.14615	6.177	5.96404	5.82545	5.89519
POLR1E	0.817209	-0.291224	3.51e-06	2.5e-05	6.3988	6.29841	6.28622	6.04828	6.00842	6.05334
LATS2	0.817256	-0.291141	0.00015	0.000543	4.27802	4.19806	4.29417	4.0021	4.02505	3.86685
MMP17	0.817395	-0.290894	0.0261441	0.0449798	2.90837	2.89466	2.6144	2.7003	2.25384	2.6176
GABRD	0.817398	-0.290889	0.00088	0.00242239	3.47799	3.35045	3.29266	3.14632	3.03277	3.07355
AL121594.1	0.816219	-0.292973	0.0920911	0.134804	2.79346	2.22052	2.36162	2.50949	1.88371	2.1285
RPL7AP6	0.81675	-0.292033	0.081119	0.120609	3.3164	3.39836	3.92514	3.2311	2.99311	3.55341
BCL3	0.817433	-0.290828	0.0195282	0.0349208	3.21251	3.12133	3.17794	3.0801	2.56258	3.02506
LINC01123	0.817469	-0.290764	0.000146	0.000533	4.46053	4.57472	4.5347	4.17823	4.3369	4.17696
SBNO1	0.817492	-0.290723	8.58e-06	5.12e-05	6.47317	6.58108	6.58612	6.22446	6.32083	6.22153
FAIM	0.817585	-0.29056	0.000138	0.000509	4.53994	4.49376	4.68748	4.27802	4.26514	4.30594
SPA17	0.817792	-0.290194	0.000351	0.00111735	3.59215	3.62259	3.52029	3.26728	3.36358	3.229
GOLIM4	0.817819	-0.290147	0.000125	0.000468	4.48128	4.47335	4.61294	4.17938	4.30251	4.20925
SLC2A6	0.817825	-0.290136	0.000717	0.00203637	3.86399	3.69113	3.65567	3.41766	3.41513	3.50539
NDUFA10	0.817906	-0.289993	4.44e-07	4.71e-06	6.92324	6.89324	6.8573	6.60732	6.58077	6.61615
RUFY2	0.817933	-0.289945	0.0042429	0.0093601	2.93939	2.9641	2.75723	2.7229	2.57289	2.50431
SYNGAP1	0.817949	-0.289918	0.00713058	0.0146583	2.79329	2.65257	2.48447	2.31524	2.42013	2.31696
CYFIP2	0.818001	-0.289826	6.47e-07	6.34e-06	6.25532	6.30832	6.26837	5.99985	5.98764	5.97575
MCCC2	0.818017	-0.289796	1.55e-06	1.28e-05	6.35459	6.36556	6.33547	6.06361	6.11102	6.01054
NT5DC2	0.818197	-0.289481	3.95e-06	2.75e-05	6.16378	6.07669	6.07408	5.86101	5.78662	5.7998
HDGF	0.818271	-0.28935	2.74e-08	5.04e-07	9.04705	9.05347	9.02994	8.75151	8.75695	8.75393
VPS13D	0.818277	-0.289338	2.49e-05	0.000124	5.67123	5.73803	5.70202	5.34016	5.51191	5.38645
AC004980.1	1.23812	0.308153	0.0406854	0.0661125	0.442477	0.534105	0.554818	1.00713	0.752392	0.70965
CD3EAP	0.818321	-0.289261	1.11e-06	9.9e-06	6.50086	6.50007	6.50372	6.19124	6.26725	6.17665
DNM3	0.818464	-0.289008	0.026265	0.0451638	1.42278	1.36814	1.41876	0.958856	1.10559	1.27045
THAP10	0.818543	-0.28887	0.00858377	0.017151	1.96742	2.1241	1.97311	1.68311	1.72318	1.7935
CCDC24	0.818576	-0.288812	0.00644395	0.0134376	2.43199	2.4596	2.52061	2.02227	2.19509	2.31947
TTI2	0.818586	-0.288794	3.54e-06	2.52e-05	5.25767	5.23799	5.2254	4.98542	4.93468	4.93612
CTSL	0.818669	-0.288648	1.54e-06	1.28e-05	5.85016	5.80517	5.81132	5.52246	5.51375	5.56446
SAP130	0.81868	-0.288628	2.01e-05	0.000104	5.96798	5.89938	6.05831	5.6807	5.73264	5.64412
PRELID2	0.818845	-0.288337	0.00054	0.00160617	3.12489	3.1747	3.09486	2.81921	2.87985	2.82801
TMEM74B	1.23716	0.307031	0.0320718	0.0536823	1.2645	1.57288	1.08399	1.59671	1.56229	1.693
ADM5	0.818864	-0.288304	0.00160997	0.00407068	3.20014	2.99623	3.04136	2.77874	2.76998	2.82096
TCTE3	1.23714	0.307014	0.0485622	0.0769635	-0.0247874	0.114049	0.148213	0.366336	0.406957	0.385294
NDE1	0.818878	-0.288279	5.52e-05	0.000239	5.24355	5.1461	5.31129	4.88218	4.9816	4.96753
HSPA1A	0.818909	-0.288224	0.00792026	0.0160287	3.14033	3.26168	3.38915	2.79552	3.15565	2.9566
CHPT1	0.819208	-0.287698	3.95e-06	2.75e-05	5.41321	5.41882	5.40927	5.09841	5.10171	5.1782
LONP1	0.819216	-0.287685	5.16e-07	5.31e-06	8.19982	8.09548	8.13064	7.85694	7.8437	7.86196
MRPL21	0.819236	-0.287649	5.99e-05	0.000256	5.8572	5.68343	5.73525	5.50903	5.39787	5.50793
RAB20	0.81926	-0.287606	0.00192791	0.00475733	3.75994	3.5194	3.67289	3.48261	3.30491	3.30651
ETHE1	0.81958	-0.287043	0.000242	0.000817	4.75131	4.65061	4.65232	4.44199	4.27373	4.48356
KCTD14	0.819732	-0.286776	0.000102	0.000396	4.35481	4.30201	4.38037	4.04517	4.14012	3.98596
MYO15B	0.819085	-0.287915	0.0693885	0.105234	0.888761	0.730468	1.0502	0.433137	0.803018	0.547855
SLC25A22	0.819792	-0.28667	1.56e-06	1.29e-05	6.87008	6.79367	6.78606	6.55918	6.49355	6.53798
POLR3C	0.819807	-0.286643	7.14e-06	4.4e-05	5.09577	5.14722	5.11889	4.80423	4.87683	4.81884
AK3	0.819892	-0.286495	3.75e-06	2.64e-05	6.22571	6.31649	6.30182	5.99637	5.95256	6.03735
MAIP1	0.8201	-0.286128	5.2e-06	3.41e-05	5.39868	5.40747	5.41485	5.18017	5.09777	5.08743
AC083899.1	0.82014	-0.286058	0.00675484	0.0139941	2.68241	2.50172	2.71772	2.32748	2.46074	2.2429
SERPINF2	0.819653	-0.286915	0.107807	0.154286	0.513219	0.730468	0.424993	0.225234	0.551958	0.0189062
IKBKE	0.820144	-0.286052	0.00496562	0.0107168	2.24727	2.25054	2.33076	1.90887	1.99296	2.06395
TRIP4	0.820504	-0.285418	2.82e-05	0.000137	5.0328	5.01817	4.93115	4.6984	4.76351	4.66133
ANAPC4	0.820637	-0.285185	1.25e-05	6.99e-05	5.16636	5.22132	5.22113	4.88218	4.9804	4.88772
MSI1	0.820638	-0.285182	3.55e-05	0.000167	4.86079	4.81686	4.75259	4.56669	4.46854	4.54317
KIF3A	0.820656	-0.285151	9.79e-05	0.000384	4.59124	4.55589	4.61708	4.19673	4.32969	4.37624
JRK	0.820693	-0.285085	0.00134717	0.00349021	3.82868	3.74484	3.92944	3.55272	3.6622	3.42465
NLRX1	0.820703	-0.285068	7.68e-05	0.000315	4.02241	4.0021	3.95928	3.74484	3.67032	3.71692
ILF3-DT	0.820801	-0.284895	0.000406	0.00125752	3.71583	3.65641	3.75773	3.35514	3.51563	3.39478
ACVR1C	0.82017	-0.286006	0.129538	0.180623	0.722887	0.347694	0.25473	0.335707	-0.109631	0.256428
STOML2	0.820826	-0.284852	6.64e-07	6.48e-06	7.87352	7.80752	7.80541	7.55118	7.50336	7.57778
LMTK2	0.820849	-0.284812	1.64e-05	8.75e-05	5.70307	5.74677	5.72794	5.40645	5.53188	5.38142
DHRS4	0.820904	-0.284714	0.000113	0.000433	4.34255	4.30656	4.19172	4.00685	3.97245	4.00884
SLC3A2	0.820982	-0.284578	1.69e-07	2.17e-06	8.33847	8.283	8.2901	8.03339	7.99482	8.02992
OMA1	0.821168	-0.284251	0.00073	0.00206628	3.90948	4.01007	4.03641	3.63289	3.63415	3.8382
NEMP2	0.821244	-0.284117	0.00308694	0.00714891	2.86409	3.03756	3.11161	2.74144	2.75427	2.66701
RDM1	0.821347	-0.283936	0.0127967	0.0242338	1.9474	2.17312	2.04291	1.75921	1.86614	1.68459
FP565260.6	0.821495	-0.283677	0.00410209	0.00910497	3.59099	3.86879	3.89208	3.52927	3.40493	3.57754
AC110079.1	0.820843	-0.284821	0.0710084	0.107425	1.84726	1.72748	2.00565	1.32302	1.93072	1.43493
UTRN	0.821564	-0.283556	8.88e-05	0.000353	5.05261	5.17779	5.17876	4.8278	4.9377	4.79021
AMH	0.821762	-0.283207	0.0262917	0.0452038	2.57329	2.13241	2.30404	1.97055	2.03922	2.13787
MRPS17	0.821875	-0.283009	1.01e-05	5.84e-05	5.46135	5.40878	5.38485	5.18192	5.08257	5.14435
WWP2	0.82188	-0.283001	2.09e-06	1.63e-05	5.56526	5.59965	5.60795	5.3198	5.31474	5.28974
MRTO4	0.821927	-0.282918	1.82e-07	2.29e-06	7.63015	7.58835	7.6107	7.34787	7.31612	7.31673
LDLR	0.821979	-0.282826	2.82e-07	3.25e-06	6.96355	6.99428	6.96822	6.69959	6.70401	6.67407
PTCD1	0.822038	-0.282724	0.000249	0.000835	4.96326	4.85983	4.7622	4.55746	4.65635	4.51817
TBCE	0.822055	-0.282694	5.54e-05	0.000239	5.24949	5.21622	5.21622	5.02804	4.97021	4.83695
KALRN	0.822099	-0.282615	0.00893823	0.0177498	2.23974	2.09775	2.26954	1.84533	1.88819	2.02043
ADORA1	0.822293	-0.282275	0.00258775	0.00612347	2.56872	2.5057	2.5725	2.31259	2.28095	2.20657
HCFC1R1	0.822298	-0.282267	2.91e-05	0.000141	5.09462	4.96784	5.02214	4.72609	4.72131	4.78916
RRP9	0.822367	-0.282145	1.7e-06	1.39e-05	6.91174	6.86138	6.82817	6.62753	6.55257	6.57602
NPRL2	0.82244	-0.282018	0.000146	0.000531	4.27263	4.34901	4.3369	4.11356	3.94835	4.05929
HSPD1P1	0.822672	-0.281611	0.0273516	0.0467608	1.62746	1.8111	1.92154	1.65905	1.41708	1.45487
MRPS9	0.822737	-0.281496	2.74e-06	2.05e-05	6.45315	6.41265	6.39649	6.10735	6.11214	6.19804
RABGAP1L	0.822897	-0.281216	4.3e-05	0.000195	4.28563	4.33006	4.31389	3.97997	4.06632	4.03641
DNAJC8	0.822932	-0.281155	6.23e-07	6.14e-06	7.72483	7.72003	7.66626	7.41368	7.3902	7.4642
SPATA5	0.823002	-0.281031	5.4e-05	0.000234	5.17477	5.13111	5.26472	4.86556	4.87891	4.98202
RHBDL3	0.823056	-0.280938	0.0210734	0.037305	2.18281	2.05627	1.87944	1.82924	1.82187	1.62243
NCAPD2	0.823123	-0.280821	9.14e-07	8.41e-06	7.73157	7.70152	7.69923	7.42252	7.4858	7.38042
SYNE3	0.822367	-0.282145	0.050281	0.0794075	1.35478	1.22035	0.975849	0.970115	0.902021	0.834001
SPEN	0.82323	-0.280633	0.000281	0.000927	6.98118	6.94167	6.98066	6.57861	6.85672	6.62013
RWDD2B	0.823333	-0.280453	1.54e-05	8.3e-05	5.02279	5.08577	5.10347	4.81214	4.74441	4.81736
DEPDC4	0.822445	-0.282009	0.0847903	0.125296	0.614081	0.76259	0.648485	0.366336	0.172145	0.653813
MMP15	0.823335	-0.280449	1.81e-05	9.48e-05	6.30292	6.19889	6.15284	5.9823	5.89734	5.93507
GALK2	0.823408	-0.280321	0.000138	0.000509	3.94534	3.89611	3.94701	3.58167	3.66639	3.69454
EID2	0.823424	-0.280292	8.23e-05	0.000333	4.77933	4.71548	4.64101	4.4558	4.36977	4.47251
MRPL36	0.823439	-0.280266	0.000151	0.000546	5.63954	5.47888	5.54088	5.35608	5.17302	5.29372
SLC4A1AP	0.823472	-0.280209	2.45e-06	1.87e-05	5.7727	5.73152	5.7882	5.48156	5.46135	5.50909
CHRFAM7A	0.823027	-0.280988	0.104965	0.150848	2.11661	1.97805	1.63533	1.56282	1.34573	1.99138
CENPJ	0.823516	-0.280132	3.02e-05	0.000145	4.62623	4.62662	4.62455	4.34255	4.40395	4.28767
AP003392.4	0.823059	-0.280933	0.140834	0.194214	0.0525123	0.347694	-0.0530093	-0.00725352	-0.0520824	-0.429848
ALDH7A1	0.823544	-0.280082	7.62e-07	7.25e-06	6.29993	6.28705	6.31127	6.04595	6.00779	6.00501
TMEM161B	0.823572	-0.280033	0.00213582	0.00520045	3.7492	3.97797	4.0292	3.57444	3.7015	3.63732
MKLN1-AS	0.823237	-0.28062	0.123735	0.173891	0.761091	0.635646	0.462603	0.14282	0.172145	0.701553
GPRC5C	0.823582	-0.280015	2.04e-05	0.000105	4.54667	4.50176	4.55494	4.23691	4.25339	4.27163
AC068888.1	0.823298	-0.280514	0.060055	0.0926203	0.631086	0.730468	0.657432	0.366336	0.270364	0.547855
KLC2	0.823699	-0.279811	1.99e-06	1.57e-05	6.39257	6.36209	6.31419	6.09297	6.04279	6.09469
USP18	0.823952	-0.279367	0.00014	0.000513	3.80847	3.77973	3.80847	3.5652	3.47095	3.52673
EED	0.823983	-0.279313	2.69e-06	2.02e-05	5.47952	5.50663	5.48126	5.22707	5.1869	5.21716
CTR9	0.824092	-0.279123	2.42e-07	2.88e-06	7.7432	7.76983	7.78634	7.48189	7.51432	7.46542
NUP188	0.824176	-0.278975	1.42e-05	7.79e-05	8.2322	8.16184	8.19639	7.92388	8.00635	7.82172
CCDC124	0.824191	-0.27895	4.78e-06	3.19e-05	7.03145	6.95321	6.91592	6.70876	6.63926	6.71678
FAM3C2	0.824236	-0.27887	0.00609247	0.012801	3.92916	4.15319	4.34735	3.86532	3.84798	3.88336
ZUP1	0.824242	-0.278861	3.05e-05	0.000147	4.52982	4.55787	4.62561	4.29605	4.29969	4.28099
ZBED3-AS1	1.22938	0.297929	0.0444445	0.0712523	0.31255	0.452323	0.521368	0.795518	0.626875	0.768006
EIF3I	0.824433	-0.278525	1.62e-07	2.11e-06	8.6788	8.62309	8.66279	8.40082	8.35859	8.36998
RNF126	0.824441	-0.278512	2.76e-05	0.000135	6.84382	6.66546	6.69156	6.46683	6.43045	6.4676
CIAO2B	0.824516	-0.278381	3.82e-05	0.000177	5.84159	5.68343	5.75642	5.5118	5.42374	5.51202
NOS3	0.824541	-0.278336	4.76e-05	0.000212	4.87408	4.87666	4.80514	4.62218	4.49735	4.60665
ATP5MF-PTCD1	0.824549	-0.278323	0.000137	0.000507	4.42279	4.38189	4.41562	4.09842	4.0576	4.23088
SCN2A	0.824128	-0.27906	0.0902899	0.13261	0.270364	0.620583	0.401376	0.275427	0.125784	0.0664774
MFSD14B	0.824686	-0.278082	9.52e-07	8.69e-06	6.49823	6.55837	6.56022	6.25169	6.26612	6.26487
ZNF595	0.824721	-0.278023	0.0226374	0.0397229	1.83688	1.73197	1.88484	1.60335	1.36814	1.65905
TOMM22	0.824764	-0.277947	6.73e-07	6.54e-06	7.69993	7.6319	7.60792	7.36477	7.37309	7.36764
TFAM	0.824764	-0.277947	1.96e-06	1.55e-05	6.74067	6.83058	6.82133	6.49191	6.53716	6.52932
TENT5A	0.824781	-0.277917	1.67e-05	8.89e-05	5.07667	5.11517	5.01185	4.80617	4.80182	4.76269
PTS	0.824797	-0.277889	6.91e-05	0.000288	4.69822	4.6772	4.6486	4.47097	4.41051	4.31086
ARHGAP10	0.824799	-0.277886	2.93e-06	2.16e-05	5.49636	5.47349	5.46602	5.21466	5.21136	5.17601
KTI12	0.825053	-0.277442	0.000381	0.00119494	4.16043	4.0227	4.13052	3.90263	3.83866	3.74038
ICOSLG	0.825065	-0.27742	0.00174073	0.00435315	3.64432	3.52168	3.62091	3.40123	3.38477	3.16654
DDX11	0.825103	-0.277353	2.22e-05	0.000112	5.80433	5.68893	5.783	5.48938	5.53166	5.42062
PFKP	0.825247	-0.277102	2.38e-07	2.86e-06	8.38417	8.33989	8.34598	8.11028	8.04966	8.07942
DUSP12	0.825293	-0.277022	3.26e-05	0.000155	4.77787	4.77778	4.77797	4.43938	4.48974	4.57162
NOC4L	0.825314	-0.276984	5.44e-06	3.54e-05	5.94468	5.84767	5.86862	5.61753	5.5823	5.6304
BCL2L11	0.825333	-0.276952	5.92e-05	0.000253	4.50122	4.56503	4.60843	4.23005	4.2935	4.3184
NMT2	0.825375	-0.276878	1.65e-05	8.79e-05	5.14582	5.16578	5.12097	4.91832	4.88085	4.80423
PAN2	0.825398	-0.276838	0.00871079	0.017359	2.50969	2.43199	2.70709	2.33832	2.22891	2.25474
ADGRA2	0.825408	-0.276821	0.00151625	0.00386373	3.08842	2.95185	2.94425	2.71807	2.71686	2.71672
CAV1	0.825424	-0.276793	2.08e-07	2.56e-06	8.28825	8.32634	8.32824	8.06964	8.0248	8.01873
B3GLCT	0.825514	-0.276635	0.00251917	0.00598074	3.49219	3.50388	3.56043	3.20716	3.11066	3.41488
FANCD2	0.825521	-0.276623	3.17e-05	0.000151	5.99339	6.00308	5.95837	5.69575	5.80476	5.62134
FTSJ3	0.825601	-0.276484	2.3e-07	2.76e-06	7.80752	7.75461	7.76254	7.50066	7.50524	7.48899
CAVIN1	0.825668	-0.276367	1.81e-07	2.29e-06	7.79769	7.80251	7.79253	7.52815	7.54178	7.49352
DNAJA3	0.825714	-0.276286	2.42e-07	2.88e-06	7.11487	7.13245	7.11222	6.83295	6.852	6.84548
ANKRD40	0.825831	-0.276081	1.66e-06	1.36e-05	7.40416	7.49308	7.473	7.16263	7.22272	7.15603
IFITM2	0.825946	-0.27588	4.05e-06	2.8e-05	5.50398	5.50056	5.50552	5.25272	5.18537	5.24655
ATG4C	0.826098	-0.275616	0.000127	0.000476	4.36075	4.46735	4.50176	4.1513	4.21571	4.13431
NOL10	0.826118	-0.27558	1.32e-06	1.13e-05	6.66238	6.58725	6.60819	6.36452	6.3284	6.33838
IPO11	0.826151	-0.275523	2.11e-06	1.65e-05	6.55267	6.56083	6.50372	6.25084	6.30866	6.23
C19orf44	0.826171	-0.275487	0.00487931	0.0105567	2.43199	2.57412	2.6144	2.2917	2.21538	2.29411
BBS5	0.826421	-0.275051	0.00259397	0.00613262	2.88809	2.90639	2.89075	2.48663	2.67098	2.69282
DPEP1	0.826431	-0.275033	7.45e-05	0.000307	4.53497	4.42786	4.44544	4.19105	4.15619	4.23619
AAAS	0.826548	-0.27483	3.91e-05	0.00018	5.89066	5.76182	5.77063	5.59023	5.47067	5.54021
OTX1	0.82655	-0.274826	0.000931	0.00254177	3.1037	3.05616	3.04053	2.81547	2.74031	2.82377
ZC3H12C	0.826564	-0.274801	0.000952	0.00258914	4.19968	4.32587	4.31252	3.9946	4.13431	3.87962
ZNF575	0.825899	-0.275962	0.117489	0.166117	0.442477	0.167843	0.123933	0.033907	-0.233045	0.114049
TMEM52	0.8269	-0.274216	0.000194	0.000676	3.95042	3.87889	3.90248	3.60864	3.5962	3.70403
CTSH	0.82691	-0.274197	0.000658	0.00189214	3.85561	3.68964	3.76718	3.48833	3.43539	3.56637
LARP7	0.826962	-0.274106	6.29e-06	3.96e-05	5.75854	5.84127	5.84821	5.51444	5.54569	5.56539
AC073111.5	0.826133	-0.275553	0.0626775	0.0960735	0.538495	0.538495	0.677606	0.234665	0.304658	0.385294
ACOX3	0.827051	-0.273952	0.000753	0.00212204	4.12469	4.04719	3.94701	3.84049	3.79082	3.66681
MICU2	0.827078	-0.273905	3.64e-06	2.57e-05	6.0476	6.12697	6.14143	5.82644	5.8397	5.82832
FGD6	0.827105	-0.273857	0.000216	0.000738	4.232	4.32178	4.31252	4.00026	4.10143	3.93937
LINC00847	0.827112	-0.273845	0.00896039	0.0177901	2.62398	2.55535	2.5928	2.48966	2.31524	2.15346
GART	0.827225	-0.273649	2.21e-07	2.69e-06	8.20933	8.19256	8.15719	7.90557	7.93422	7.8979
PGAP1	0.827273	-0.273564	0.00581595	0.0122854	2.96444	3.08073	3.19079	2.67056	2.924	2.80804
ELP2	0.827278	-0.273556	1.36e-06	1.16e-05	6.31305	6.35563	6.36015	6.09856	6.05499	6.05586
CDS1	0.82732	-0.273482	3.49e-05	0.000164	5.28614	5.40224	5.34387	5.07472	5.01371	5.12695
HIBADH	0.827332	-0.273461	1.52e-05	8.25e-05	4.8357	4.84415	4.9049	4.59862	4.5787	4.58779
ZNF296	0.827483	-0.273198	0.000277	0.000915	4.28234	4.21735	4.25441	4.04439	4.02505	3.86449
RTN4IP1	0.827542	-0.273096	0.000341	0.00109072	3.48556	3.56637	3.55677	3.28636	3.27834	3.22633
KEAP1	0.827548	-0.273085	4.59e-06	3.09e-05	7.43606	7.31673	7.31959	7.10447	7.05891	7.08997
AD000864.1	0.827104	-0.273859	0.0607407	0.0935118	1.33362	1.22035	1.34028	1.12143	1.19715	0.746302
PAIP2B	0.827608	-0.272981	0.00329642	0.00755745	2.7828	2.98478	2.93851	2.65469	2.57945	2.6614
CDC45	0.82767	-0.272872	2.78e-05	0.000135	5.19045	5.12776	5.11259	4.937	4.82616	4.85227
MRPL55	0.827683	-0.27285	0.00035	0.0011129	4.82977	4.73471	4.67014	4.54531	4.36748	4.50974
ARL17A	0.827864	-0.272535	0.0110275	0.0213457	2.63743	2.44626	2.61684	2.20569	2.21902	2.45412
MED6	0.827918	-0.27244	3.85e-06	2.69e-05	5.39838	5.42205	5.43785	5.16447	5.13876	5.13876
SOGA1	0.827933	-0.272414	1.99e-05	0.000103	5.91142	5.93759	5.85006	5.5928	5.7038	5.5823
CCDC28A	0.827985	-0.272324	0.00976674	0.0191816	2.76708	2.92598	2.78292	2.47272	2.44512	2.74754
CDC20	0.828023	-0.272258	4.86e-07	5.04e-06	8.7046	8.64577	8.64943	8.43498	8.36451	8.38417
AK6	0.828052	-0.272207	0.000413	0.00127665	4.91893	5.11621	5.13506	4.7646	4.845	4.74306
WDR61	0.828245	-0.27187	1.82e-06	1.47e-05	6.02219	6.01312	5.96696	5.73239	5.7283	5.72609
ATP5MPL	0.828298	-0.271778	1.8e-05	9.45e-05	6.3717	6.30292	6.28137	6.10498	5.9691	6.0693
PUM3	0.828332	-0.27172	2.25e-06	1.74e-05	5.97806	5.96561	6.02219	5.73912	5.70913	5.70307
DLAT	0.828396	-0.271607	3.11e-07	3.5e-06	7.46542	7.50823	7.47643	7.22748	7.19644	7.21207
TMEM107	0.828403	-0.271596	0.00547385	0.0116706	2.30552	2.38008	2.39114	2.15424	2.01978	2.0972
AQP3	0.828442	-0.271528	0.000941	0.00256588	3.3346	3.3801	3.28789	3.1548	3.01666	3.02506
MCM9	0.828471	-0.271478	0.000255	0.000851	4.04011	4.13317	4.11837	3.81441	3.90248	3.75727
RPS19BP1	0.828542	-0.271353	1.68e-05	8.95e-05	6.64794	6.57812	6.58179	6.36209	6.24433	6.38951
ARHGEF10	0.828576	-0.271294	1.1e-05	6.29e-05	5.75609	5.79071	5.72626	5.42674	5.54146	5.4879
DIS3L2	0.828587	-0.271275	2.5e-05	0.000124	5.17853	5.12819	5.06647	4.81568	4.87265	4.86863
CACNA1A	1.22065	0.287654	0.0406635	0.06609	0.722887	0.849507	1.08399	1.21052	1.11786	1.19715
AGPS	0.828654	-0.271159	4.57e-06	3.08e-05	7.16263	7.20758	7.27857	6.91136	6.9865	6.93618
TATDN3	0.828851	-0.270816	8.23e-05	0.000333	4.08896	4.13597	4.06278	3.8338	3.81124	3.83222
USP40	0.828893	-0.270742	2.47e-05	0.000123	5.41968	5.41686	5.45913	5.11259	5.24187	5.12445
ATG16L1	0.828922	-0.270691	9.94e-06	5.77e-05	5.32658	5.24331	5.26598	5.01314	5.01842	4.9911
CTH	0.82895	-0.270643	0.00194706	0.00479734	3.237	3.25992	3.14643	2.82411	2.99491	3.00393
TMEM186	0.828979	-0.270592	0.00318553	0.00733809	3.61174	3.60369	3.78467	3.50262	3.43873	3.24873
LARS	0.828992	-0.270569	6.19e-07	6.12e-06	7.53045	7.53353	7.51071	7.25281	7.29396	7.21553
STIM1	0.829105	-0.270373	4.92e-05	0.000218	5.17477	5.16511	5.03741	4.84319	4.87683	4.84509
PLEKHG4	0.829151	-0.270293	0.000902	0.00247104	3.85047	3.64205	3.71508	3.47827	3.48262	3.43194
ACAA2	0.829219	-0.270176	0.000126	0.000471	4.13306	4.1887	4.10185	3.83622	3.92091	3.85294
PRRG2	1.2198	0.286644	0.0370621	0.0609469	1.51104	1.3074	1.11918	1.53634	1.51974	1.7404
COL18A1	0.829354	-0.269941	5.82e-06	3.72e-05	6.06717	6.02158	5.96992	5.75303	5.77517	5.71972
RAB29	0.829383	-0.269889	6.03e-05	0.000257	4.83255	4.89126	4.81554	4.54901	4.5289	4.65372
COPS9	0.82946	-0.269755	0.000252	0.000844	5.60184	5.37147	5.51586	5.22349	5.18636	5.26888
TIGD2	0.82959	-0.269529	0.000148	0.000537	4.15658	4.05493	4.08415	3.78356	3.84397	3.85523
AEN	0.829668	-0.269394	1.76e-06	1.43e-05	6.7218	6.67754	6.69959	6.38698	6.46872	6.43299
SHPRH	0.829701	-0.269336	0.000331	0.00106443	3.85561	3.91867	3.88999	3.56637	3.58063	3.71001
SLC25A17	0.829751	-0.269249	2.53e-05	0.000125	4.70362	4.71394	4.77456	4.48532	4.45396	4.44634
MAGOHB	0.829821	-0.269128	1.98e-05	0.000102	4.96943	4.9816	5.00913	4.75892	4.73051	4.6643
TGDS	0.829904	-0.268983	5.78e-05	0.000249	4.62809	4.66212	4.67532	4.45798	4.37423	4.33006
SRGAP2B	0.829933	-0.268934	0.000124	0.000466	4.58578	4.70712	4.72553	4.35403	4.41597	4.44065
EEF1AKMT2	0.830222	-0.268431	1.47e-05	7.98e-05	5.05547	5.12729	5.10558	4.7946	4.84622	4.84121
ITPR2	0.830286	-0.26832	0.00613321	0.0128753	2.56128	2.7989	2.72516	2.39814	2.41201	2.47449
RMI2	0.830288	-0.268317	0.000375	0.0011783	3.74476	3.80017	3.76177	3.56309	3.42032	3.52673
DHX16	0.830289	-0.268314	1.03e-06	9.3e-06	6.56792	6.55368	6.5365	6.27313	6.31305	6.26601
CHD1	0.83047	-0.268	0.000191	0.000666	5.91223	6.02686	6.0275	5.64321	5.84148	5.67316
ACACB	0.830505	-0.26794	0.012333	0.0234841	2.64177	2.58026	2.64928	2.17408	2.33702	2.54672
TOP2A	0.830551	-0.26786	8.32e-06	4.98e-05	7.99062	7.99309	8.01743	7.72046	7.81953	7.65611
IFT88	0.830585	-0.2678	0.000561	0.0016573	3.72748	3.67962	3.84621	3.47523	3.50685	3.46487
PFAS	0.830633	-0.267716	2.1e-05	0.000107	6.73802	6.68983	6.67701	6.44721	6.50901	6.3437
RPL17-C18orf32	0.830811	-0.267409	0.0190836	0.034215	4.2996	3.90814	4.35834	3.84154	3.89404	4.01921
ALS2	0.830895	-0.267262	3.33e-05	0.000158	5.30931	5.40044	5.33239	5.05902	5.14591	5.03342
AC087190.3	1.21725	0.283629	0.0483358	0.0766607	3.82467	4.43024	3.9454	4.51745	4.13898	4.42158
GFOD1	0.830935	-0.267192	0.00255253	0.00605113	3.1418	3.30619	3.21467	2.84225	3.01163	3.00115
PPIF	0.831022	-0.267041	3.69e-07	4.02e-06	7.6674	7.62703	7.63776	7.40188	7.36528	7.36426
PLD6	0.831037	-0.267015	7.75e-05	0.000317	4.82193	4.74926	4.87718	4.50821	4.59708	4.53723
NUDT6	0.831052	-0.26699	0.0102206	0.0199696	2.34469	2.3579	2.43849	2.13699	1.97635	2.23683
MTHFD1	0.831316	-0.266531	5.53e-07	5.61e-06	8.18161	8.11967	8.14264	7.8583	7.91442	7.87055
DDR1	0.83132	-0.266525	6.12e-07	6.07e-06	7.27462	7.26821	7.22496	6.97027	6.98905	7.00858
RPL7P9	0.83149	-0.266229	0.016107	0.0295283	6.60073	6.56285	6.6252	6.01221	6.4061	6.56345
SLC52A3	0.831523	-0.266172	0.000205	0.000707	3.95928	3.89611	3.97891	3.64701	3.72748	3.65604
NSUN5	0.831523	-0.266172	4.61e-06	3.1e-05	6.29094	6.19286	6.23398	5.99339	5.95515	5.9709
GPLD1	0.830704	-0.267594	0.0684474	0.104049	1.70013	1.4833	1.47249	1.01258	1.51974	1.29051
FAM129B	0.831594	-0.266049	3.03e-07	3.43e-06	8.1397	8.10315	8.07942	7.85179	7.83699	7.83541
DHX9	0.831659	-0.265935	6.15e-07	6.09e-06	9.11378	9.12331	9.11796	8.82911	8.91118	8.81612
ACTR6	0.831666	-0.265924	5.54e-05	0.000239	5.01817	5.06293	4.95098	4.69745	4.73583	4.80054
KLHL26	0.831683	-0.265894	9.61e-05	0.000379	4.63034	4.53878	4.51027	4.29885	4.32697	4.25339
MATN2	0.831723	-0.265826	0.0242516	0.0421748	1.82063	1.98687	1.8726	1.62179	1.4949	1.77743
ITPRIPL1	0.831791	-0.265707	3.7e-05	0.000172	4.74659	4.80563	4.84753	4.55391	4.50916	4.542
SULT4A1	1.2158	0.281911	0.0396215	0.0645932	0.70968	0.879023	0.920623	1.06575	1.2331	1.0499
AC005229.4	1.21579	0.281898	0.0353799	0.0585203	1.02401	1.02804	1.02051	1.49813	1.19715	1.23846
ECT2	0.831838	-0.265626	3.87e-06	2.7e-05	7.40987	7.4737	7.49678	7.17279	7.25014	7.15949
FBXO22	0.831871	-0.265568	3.22e-06	2.33e-05	5.9761	6.01312	5.97592	5.70303	5.70483	5.76096
ARL4C	0.831902	-0.265515	0.0014374	0.00368878	3.31902	3.32436	3.34029	2.93915	3.09791	3.1418
FUBP1	0.832113	-0.265149	7.5e-07	7.14e-06	7.70245	7.68978	7.69858	7.38727	7.47204	7.43474
METTL4	0.832142	-0.265097	0.000853	0.00235848	3.55229	3.61527	3.66595	3.43147	3.34445	3.26728
FJX1	0.832217	-0.264968	0.000125	0.000468	4.96549	4.81787	4.8278	4.59124	4.64542	4.5756
NEIL3	0.832329	-0.264774	5.03e-05	0.000222	4.8455	4.82062	4.84034	4.52579	4.6461	4.53497
SPAG1	0.832411	-0.264632	6.05e-05	0.000258	4.32672	4.33205	4.34671	4.04733	4.11608	4.04499
EPHA4	0.832495	-0.264486	0.0244042	0.0424063	2.25396	2.40277	2.15822	1.99151	2.17312	1.84911
STARD5	0.831756	-0.265767	0.0822923	0.122117	0.489696	0.730468	0.532707	0.309165	0.227385	0.427822
MMD	0.832561	-0.264372	0.000226	0.000768	3.96158	3.96561	4.0292	3.77546	3.6622	3.73101
PIM2	0.832673	-0.264177	9.65e-05	0.00038	4.63131	4.59113	4.70787	4.43448	4.35862	4.34696
HEATR6	0.832694	-0.264142	5.88e-05	0.000252	5.39102	5.3839	5.34973	5.05415	5.20763	5.06513
EMG1	0.832805	-0.263949	3.14e-06	2.28e-05	6.96144	6.88437	6.8594	6.65214	6.62284	6.63853
ARHGAP5-AS1	0.832048	-0.265262	0.209079	0.272874	-0.292428	0.114049	0.424993	-0.395113	-0.0520824	-0.111569
ENDOG	0.832826	-0.263913	0.00076	0.00213935	4.30029	4.16708	4.07348	3.88704	3.91391	3.9454
RRP1	0.832829	-0.263908	3.28e-06	2.36e-05	6.71451	6.67009	6.64816	6.44995	6.36882	6.42372
LINC00630	0.832176	-0.26504	0.128099	0.179135	0.570865	0.76259	0.334434	0.174122	0.513784	0.173055
TAF3	0.83318	-0.2633	4.09e-05	0.000187	4.93755	4.9618	4.9656	4.62371	4.75296	4.69368
MORN2	0.833203	-0.263261	0.00167657	0.00421197	3.46007	3.35514	3.5058	3.16192	3.10342	3.26728
BBS10	0.833292	-0.263106	0.000775	0.00217199	4.50054	4.61745	4.55713	4.24564	4.43164	4.20183
ATP5MC2	0.833465	-0.262806	2.84e-05	0.000138	6.53716	6.40324	6.52116	6.26612	6.17172	6.23626
ZNF619	0.833506	-0.262736	0.0042031	0.0092896	2.61722	2.73908	2.65343	2.38222	2.36162	2.48196
COPZ1	0.833513	-0.262723	2.82e-07	3.25e-06	7.57251	7.57645	7.57154	7.32434	7.2924	7.31612
SNIP1	0.833716	-0.262371	2.77e-05	0.000135	4.78916	4.79276	4.7404	4.49712	4.54474	4.49149
ICA1L	0.833834	-0.262169	0.0231646	0.0405062	1.85723	1.87334	1.80781	1.64801	1.68204	1.41951
NAT10	0.833853	-0.262134	2.66e-06	2e-05	7.55401	7.53128	7.50823	7.27722	7.31913	7.20995
ZRANB3	0.83406	-0.261777	0.000459	0.00139907	3.64947	3.61527	3.61174	3.38749	3.40987	3.2917
ATP23	0.834168	-0.261589	0.00128778	0.00335235	3.08842	3.21306	3.14181	2.88018	2.87985	2.90108
PHLDA3	0.834305	-0.261353	0.000357	0.00113143	5.45052	5.28614	5.21097	5.05079	5.05261	5.05858
C1QBP	0.834348	-0.261278	2.78e-07	3.21e-06	9.33465	9.30782	9.31743	9.08381	9.017	9.07583
XRCC3	0.834393	-0.261201	1.83e-05	9.57e-05	5.32509	5.23949	5.29347	5.02036	4.99629	5.05772
PTCD2	0.83448	-0.261051	0.000228	0.000776	4.34328	4.37661	4.50054	4.16027	4.15852	4.1186
BTD	0.834564	-0.260905	0.0141254	0.0263553	2.54081	2.48436	2.50655	2.45196	2.2037	2.10574
DRAM1	0.83461	-0.260826	7.01e-05	0.000292	4.91055	4.99425	4.93645	4.70787	4.61681	4.73884
AP006621.3	0.833717	-0.262371	0.163783	0.221086	0.0525123	-0.111569	0.123933	-0.266027	-0.491674	0.0434529
RGS3	0.834632	-0.260788	6.43e-05	0.000271	5.20708	5.0887	5.13284	4.91488	4.90935	4.82062
HSPD1	0.834646	-0.260764	1.52e-07	2e-06	11.5507	11.4863	11.5078	11.2382	11.2854	11.2382
NPM1P27	0.834719	-0.260637	0.000677	0.00193987	5.05719	5.24243	5.15254	4.8741	4.79747	5.004
CHD1L	0.834857	-0.260399	1.99e-06	1.57e-05	5.99985	6.02465	6.0325	5.7652	5.75728	5.7537
TMEM170A	0.834873	-0.260372	8.34e-05	0.000336	4.92708	5.04845	5.07288	4.76541	4.73471	4.76968
KARS	0.83489	-0.260342	5.31e-07	5.43e-06	8.53229	8.45858	8.49838	8.25528	8.21761	8.23551
AC011978.2	0.834392	-0.261203	0.161923	0.219029	0.0525123	0.330615	0.276133	-0.266027	0.270364	-0.148655
URB2	0.83506	-0.260048	2.34e-05	0.000117	6.38355	6.35374	6.35356	6.12673	6.16982	6.01283
RANBP17	0.835073	-0.260025	0.00518478	0.0111197	2.8025	2.90376	2.74754	2.63543	2.58603	2.45694
FGFR3	0.835111	-0.25996	7.55e-05	0.000311	4.39879	4.42179	4.39532	4.19378	4.09558	4.15144
AL441992.2	0.834583	-0.260873	0.236136	0.303383	1.69723	1.22766	0.983725	1.49366	0.655611	1.01175
CNEP1R1	0.835165	-0.259867	0.00379226	0.00852621	3.30619	3.5056	3.36431	3.03353	3.23993	3.11556
B4GALNT3	0.835336	-0.259571	0.000445	0.00136193	3.68388	3.74484	3.80958	3.50262	3.45487	3.50539
MFAP3L	0.835351	-0.259545	0.000699	0.00199213	3.96898	4.13597	4.11622	3.75985	3.80796	3.87522
SGPL1	0.835443	-0.259387	1.85e-06	1.49e-05	6.36776	6.38384	6.4236	6.1282	6.14365	6.12489
KIF11	0.835472	-0.259337	2.63e-05	0.000129	6.91444	6.92909	6.92636	6.616	6.7665	6.60624
IFT80	0.835473	-0.259334	0.00105203	0.00281746	3.97978	4.14535	4.10291	3.72943	3.80912	3.91063
GEM	0.835482	-0.25932	0.0071065	0.0146203	3.54477	3.7377	3.82236	3.52439	3.30149	3.51563
CD9	0.835496	-0.259296	4.91e-06	3.26e-05	7.14415	7.08333	7.05859	6.87154	6.78606	6.852
PSMG2	0.835511	-0.259269	3.76e-06	2.64e-05	5.89334	5.86986	5.89979	5.59409	5.64741	5.64194
SLC25A19	0.835543	-0.259214	4.81e-05	0.000214	5.51227	5.4768	5.4581	5.30161	5.14591	5.22683
SEC23IP	0.835693	-0.258955	3.8e-06	2.66e-05	7.55401	7.65494	7.63062	7.37865	7.37015	7.31447
SNRPG	0.835718	-0.258912	1.51e-05	8.18e-05	7.2924	7.21553	7.18279	6.93618	6.93702	7.04047
AACSP1	0.835347	-0.259552	0.131306	0.182777	0.0918174	0.232246	0.334434	-0.266027	0.0215631	0.114049
RUNX3	0.835797	-0.258776	7.05e-06	4.36e-05	5.32339	5.34519	5.32228	5.06219	5.09092	5.06069
AC073861.1	0.835408	-0.259448	0.100211	0.145072	1.3992	0.867226	1.15143	0.820084	0.957201	0.845174
L2HGDH	0.8358	-0.258771	0.00016	0.000574	4.76882	4.85579	4.93341	4.55589	4.63362	4.58993
HAUS2	0.83586	-0.258666	2.17e-05	0.00011	5.84657	5.90783	5.91287	5.63817	5.68826	5.56378
ATF7IP2	0.835882	-0.258628	0.00573463	0.0121411	2.55542	2.54175	2.54288	2.27606	2.2037	2.38892
NUP88	0.835889	-0.258616	1.32e-06	1.13e-05	6.90007	6.85701	6.88342	6.61172	6.65214	6.59961
[truncated: 11,031 more rows]
