# Supplementary material for: p53-induced RNA-binding protein ZMAT3 inhibits transcription of a hexokinase to suppress mitochondrial respiration in human cancer cells
Source: eLife. 2026 Mar 17;14:RP107538. doi: 10.7554/eLife.107538 (PMC12995290; doi:10.7554/eLife.107538)
Supplement: Supplementary file 2. [file elife-107538-supp2.xlsx]

## Sheet: Proteomics ZMAT-KO vs ZMAT3-WT
	Supplementary File 2. Quantitative mass spectrometry was performed from five ZMAT3-WT and four ZMAT3-KO biological replicates of HCT116 cells. Differentially expressed proteins were identified by using p-value<0.05 as cut-off.
Accession	Gene Symbol	Description	Fold Change (ZMAT3-KO/ZMAT3-WT)	p-value	ZMAT3-KO rep 1	ZMAT3-KO rep 2	ZMAT3-KO rep 3	ZMAT3-KO rep 4	ZMAT3-WT rep 1	ZMAT3-WT rep 2	ZMAT3-WT rep 3	ZMAT3-WT rep 4	ZMAT3-WT rep 5	log2 Fold Change (ZMAT3-KO/ZMAT3-WT)	#-log10 pValue
H3BQK9	MACF1	Microtubule-actin cross-linking factor 1, isoforms 6/7	1.28178	4.38134e-06	117.073	120.726	118.697	115.07	97.4936	92.3196	88.3631	91.7109	89.9863	0.358152	5.35839
A1L020	MEX3A	RNA-binding protein MEX3A	2.17184	4.41784e-06	131.437	146.573	143.316	155.585	59.204	61.2158	78.0765	60.7368	72.8075	1.11892	5.35479
P48960	ADGRE5	Adhesion G protein-coupled receptor E5	1.20041	3.01952e-05	115.352	110.423	108.648	116.16	90.9016	95.2397	94.0566	92.3805	96.6199	0.263525	4.52006
P62760	VSNL1	Visinin-like protein 1	1.39998	4.0031e-05	120.4	124.3	121.2		88.6	92.7	90.7	79.7	83.9	0.485411	4.3976
Q9H3S7	PTPN23	Tyrosine-protein phosphatase non-receptor type 23	1.54994	4.56292e-05	137.704	124.822	120.029	121.636	78.4881	70.3996	88.2742	85.0787	84.3797	0.632217	4.34076
O00764	PDXK	Pyridoxal kinase	1.45858	5.49443e-05	120.608	118.732	123.473	133.961	88.4066	89.6907	73.3923	86.5298	87.7151	0.544564	4.26008
Q02809	PLOD1	Procollagen-lysine,2-oxoglutarate 5-dioxygenase 1	1.32499	0.000101955	130.523	117.581	111.963	118.374	87.5837	88.1856	94.8071	89.5902	91.1954	0.405982	3.99159
P49748	ACADVL	Very long-chain specific acyl-CoA dehydrogenase, mitochondrial	1.1461	0.00010807	106.864	110.075	107.566	109.373	94.9234	99.7398	91.6121	94.9234	92.0135	0.196733	3.9663
Q9Y2L1	DIS3	Exosome complex exonuclease RRP44	1.36357	0.00013307	114.255	130.942	121.626	117.089	88.5576	79.2412	92.2433	90.4004	93.1647	0.447392	3.87592
O95817	BAG3	BAG family molecular chaperone regulator 3	1.26755	0.000150989	104.246	110.891	115.454	119.907	88.4749	87.979	87.7806	86.6895	93.3351	0.342045	3.82105
P60891	PRPS1	Ribose-phosphate pyrophosphokinase 1	3.11944	0.000160658	164.403	140.587	145.11	215.879	57.3241	53.9087	60.9242	46.1547	48.5547	1.64129	3.7941
Q8TEQ6	GEMIN5	Gem-associated protein 5	0.780842	0.00019935	93.3773	92.2245	90.7573	87.3054	110.46	110.25	114.442	122.093	124.922	-0.356897	3.70038
P09382	LGALS1	Galectin-1	1.53004	0.000317903	142.836	126.067	119.905	128.033	79.1959	82.3274	103.036	77.8827	79.802	0.613571	3.4977
O14908	GIPC1	PDZ domain-containing protein GIPC1	1.43407	0.000337287	121.129	121.024	130.198	133.281	83.6016	82.872	76.5132	96.8403	100.906	0.52011	3.472
P54886	ALDH18A1	Delta-1-pyrroline-5-carboxylate synthase	1.15878	0.000343128	109.248	115.866	112.099	108.567	92.55	94.2809	96.1135	102.222	95.7063	0.212602	3.46454
Q9Y6W5	WASF2	Actin-binding protein WASF2	0.873914	0.000512065	90.6512	95.7042	94.4915	94.6111	102.879	111.874	106.012	111.267	105.002	-0.194436	3.29067
O00267	SUPT5H	Transcription elongation factor SPT5	0.782668	0.000537144	91.5358	85.337	86.1635	77.2234	114.781	112.715	99.8009	106.93	109.202	-0.353528	3.26991
Q13641	TPBG	Trophoblast glycoprotein	1.7065	0.000544634	112.074	149.826	150.417	130.663	84.277	74.3215	67.6187	92.754	78.7571	0.771042	3.2639
Q52LW3	ARHGAP29	Rho GTPase-activating protein 29	0.490215	0.000561064	59.4025	61.2681	64.6064	58.8496	147.377	139.915	93.964	123.518	117.725	-1.02851	3.25099
A0A0D9SG79	UBAP1	Ubiquitin-associated protein 1 (Fragment)	1.221	0.000662225	108.676	118.714	110.315	114.93	94.8484	89.6246	100.994	92.1853	85.7323	0.288068	3.17899
Q96F07	CYFIP2	Cytoplasmic FMR1-interacting protein 2	0.523182	0.000697292	77.4	59.4	53.9		129.3	99.6	124	129.7	124.9	-0.934614	3.15659
P35900	KRT20	Keratin, type I cytoskeletal 20	0.651139	0.00072301	70.0387	61.6417	64.886	88.1476	119.467	116.318	107.444	101.527	101.814	-0.618962	3.14086
Q15714	TSC22D1	TSC22 domain family protein 1	1.20818	0.00074886	118.154	120.95	123.637	106.743	98.4799	99.6625	98.2649	96.8672	92.4593	0.27284	3.1256
Q13451	FKBP5	Peptidyl-prolyl cis-trans isomerase FKBP5	0.822378	0.00077418	85.5744	86.1701	87.8578	88.7762	112.18	110.095	95.7004	107.316	104.238	-0.282126	3.11116
P50151	GNG10	Guanine nucleotide-binding protein G(I)/G(S)/G(O) subunit gamma-10	0.64665	0.000796819	96.4489	62.9808	63.3865	77.1307	114.096	110.952	113.487	122.006	119.268	-0.628942	3.09864
O75874	IDH1	Isocitrate dehydrogenase [NADP] cytoplasmic	1.19874	0.000878482	103.017	104.26	104.451	117.353	91.4541	89.3517	85.338	90.2118	91.0718	0.261523	3.05627
Q9HCY8	S100A14	Protein S100-A14	2.18286	0.00108586	184.887	138.765	120.475	138.942	67.3944	63.8159	94.9287	56.5596	51.1919	1.12622	2.96423
Q9NWS0	PIH1D1	PIH1 domain-containing protein 1	0.919028	0.00108737	96.4543	93.7864	95.2229	96.6495	102.508	103.637	106.408	100.046	107.126	-0.121819	2.96362
F8W930	IGF2BP2	Insulin-like growth factor 2 mRNA-binding protein 2	1.6429	0.00128622	158.722	121.821	114.244	122.151	81.575	73.3093	91.4152	77.5405	69.4716	0.716248	2.89069
Q08AF3	SLFN5	Schlafen family member 5	1.62998	0.00137415	92.2065	102.599	102.756	118.782	58.9965	45.1655	72.7493	66.6543	75.7187	0.704859	2.86197
O95239	KIF4A	Chromosome-associated kinesin KIF4A	1.1709	0.00141935	99.589	103.245	104.111	108.565	92.5648	86.5991	94.2968	81.8843	88.2349	0.227622	2.84791
O95671	ASMTL	Probable bifunctional dTTP/UTP pyrophosphatase/methyltransferase protein	0.875579	0.00150638	95.4673	90.1357	92.6506	96.0569	105.326	102.409	103.012	111.664	111.965	-0.191691	2.82207
I3L4A1	CHMP6	Charged multivesicular body protein 6 (Fragment)	1.32916	0.0016069	100.018	119.02	106.258	116.398	82.9074	72.5085	92.1719	88.2959	79.5041	0.410516	2.79401
P05787	KRT8	Keratin, type II cytoskeletal 8	0.722866	0.00165543	78.9426	83.3626	84.3905	79.3472	102.687	100.734	109.163	123.656	127.562	-0.4682	2.78109
P25705	ATP5F1A	ATP synthase subunit alpha, mitochondrial	1.08	0.00167106	101.507	105.423	103.759	105.582	93.3827	95.7319	100.235	97.396	95.0467	0.111037	2.77701
O94925	GLS	Glutaminase kidney isoform, mitochondrial	1.14173	0.00182783	109.269	113.399	108.187	104.476	91.4669	95.0076	101.892	91.0735	97.1713	0.191226	2.73807
Q13287	NMI	N-myc-interactor	1.19749	0.00185969	94.6061	101.834	98.4979	105.673	84.5062	82.375	91.919	77.2787	82.097	0.260018	2.73056
Q9H3H3	C11orf68	UPF0696 protein C11orf68	1.14285	0.00202104	106.712	105.31	109.214	108.192	99.4039	97.502	86.1901	90.9952	95.6	0.192632	2.69442
A0A1B0GVH5	FTO	Alpha-ketoglutarate-dependent dioxygenase FTO	0.819191	0.00203401	81.7597	86.4095	83.8909	95.0766	101.037	100.359	103.459	113.63	111.209	-0.287728	2.69165
O14757	CHEK1	Serine/threonine-protein kinase Chk1	0.74068	0.00203796	84.7579	78.0927	75.8046	92.5089	108.235	99.1827	107.241	122.262	121.964	-0.433077	2.6908
Q13724	MOGS	Mannosyl-oligosaccharide glucosidase	1.19901	0.00205974	108.757	120.874	109.969	111.971	88.7625	86.3389	97.3459	99.5674	98.7596	0.261845	2.68619
Q7Z3T8	ZFYVE16	Zinc finger FYVE domain-containing protein 16	1.73588	0.00206426	113.035	119.045	105.678	154.461	73.024	54.5437	83.6098	67.7311	75.5359	0.79567	2.68524
A0A7I2V4I5	ZC3H13	Zinc finger CCCH domain-containing protein 13	0.778373	0.00215681	81.0857	81.0857	79.108	92.9524	106.994	116.684	103.73	95.7206	113.619	-0.361467	2.66619
A0A7P0TA71	P4HB	Protein disulfide-isomerase	0.891816	0.00216521	84.6253	93.7848	93.8844	87.4056	102.347	101.75	101.55	97.0702	101.451	-0.165182	2.6645
O43424	GRID2	Glutamate receptor ionotropic, delta-2	2.02974	0.00222728	122.177	119.127	111.981	180.329	66.2299	55.1626	77.123	64.0513	66.0556	1.02129	2.65223
Q7Z2Z2	EFL1	Elongation factor-like GTPase 1	1.46069	0.00250054	136.352	112.122	104.901	124.962	74.4946	70.5988	94.5435	92.168	77.5352	0.546652	2.60197
A0A1B0GW77	ALDH7A1	Aldehyde dehydrogenase (NAD(+))	0.878216	0.00262672	88.7048	91.6848	93.0755	84.6921	105.492	106.982	96.2542	100.625	100.426	-0.187353	2.58059
Q9NZN4	EHD2	EH domain-containing protein 2	1.25238	0.00272998	115.708	129.887	122.745	114.556	104.22	104.841	88.9025	98.0101	86.0046	0.324673	2.56384
Q9UBX3	SLC25A10	Mitochondrial dicarboxylate carrier	1.19273	0.00276083	117.493	109.258	110.162	115.168	86.1615	87.7682	99.3167	98.915	101.626	0.25427	2.55896
Q13426	XRCC4	DNA repair protein XRCC4	1.45404	0.00286757	101.34	109.99	117.001	122.331	68.1064	63.0986	74.0247	86.954	95.2397	0.540063	2.54249
A0A494C0R8	CLUH	Clustered mitochondria protein homolog	0.838246	0.00295509	87.7098	81.9	80.307	94.1305	106.358	97.3617	109.169	100.454	99.7044	-0.254554	2.52943
Q8WX93	PALLD	Palladin	1.54568	0.00306585	146.065	122.883	110.507	128.019	90.7628	87.2266	100.193	65.5182	66.6969	0.628243	2.51345
P49454	CENPF	Centromere protein F	1.1769	0.0031764	91.7995	98.2738	95.9547	105.095	84.7455	81.5566	90.1568	79.4308	79.5274	0.234991	2.49806
Q6DKK2	TTC19	Tetratricopeptide repeat protein 19, mitochondrial	0.864251	0.0035457	94.6289	93.2559	99.0646	89.8371	107.302	112.266	102.444	105.507	117.441	-0.210478	2.4503
A0A8J8YWN6	CYB5R3	Cytochrome-b5 reductase	1.09402	0.00356744	104.417	110.806	108.91	108.691	100.025	104.018	96.6311	94.6346	99.2265	0.129636	2.44764
O95407	TNFRSF6B	Tumor necrosis factor receptor superfamily member 6B	1.70521	0.00364031	106.2	154.4	146.4		76.4	66.3	91	81.6	82.5	0.769951	2.43886
P08648	ITGA5	Integrin alpha-5	1.47099	0.00389504	106.97	128.499	117.011	134.003	70.0905	64.2979	87.5649	92.3921	99.0536	0.556784	2.40949
P47895	ALDH1A3	Aldehyde dehydrogenase family 1 member A3	0.604507	0.00398736	68.4401	64.664	60.9824	64.5343	125.741	118.283	119.416	85.7153	85.6209	-0.726169	2.39931
Q8WXA9	SREK1	Splicing regulatory glutamine/lysine-rich protein 1	1.17679	0.00407367	101.5	96.1429	100.748	110.284	91.8198	90.8799	87.2147	85.0531	79.1323	0.234855	2.39001
X6RLX0	ERC1	ELKS/Rab6-interacting/CAST family member 1	1.28609	0.00409997	104.708	118.104	112.194	124.297	84.515	77.7183	103.723	89.1446	91.3116	0.362997	2.38722
P15407	FOSL1	Fos-related antigen 1	1.87814	0.00422139	105.421	128.207	107.914	168.399	79.0225	69.2199	80.3123	60.5352	50.3027	0.909305	2.37454
P41250	GARS1	Glycine--tRNA ligase	1.07258	0.00423459	101.994	103.89	103.99	106.733	93.1116	98.6004	95.4069	100.497	97.9019	0.10109	2.37319
P54577	YARS1	Tyrosine--tRNA ligase, cytoplasmic	1.08068	0.00432374	102.023	105.867	105.867	103.397	99.0659	97.4888	90.6872	97.7845	97.4888	0.111937	2.36414
Q5BJH7	YIF1B	Protein YIF1B	1.72447	0.00433315	139.082	111.759	111.142	118.31	52.6183	42.4825	75.5342	88.9311	88.5786	0.786154	2.3632
A0A7P0Z4P5	SLC3A2	4F2 cell-surface antigen heavy chain	0.655921	0.00447619	75.4593	82.0437	87.5829	76.4008	118.833	120.191	93.0176	137.645	142.975	-0.608405	2.34909
Q9Y5K5	UCHL5	Ubiquitin carboxyl-terminal hydrolase isozyme L5	1.2448	0.00456201	121.659	107.881	101.138	111.505	92.5389	92.2457	97.1316	81.9853	80.1287	0.31591	2.34084
O43310	CTIF	CBP80/20-dependent translation initiation factor	1.3974	0.00460608	135.3	117.7	124.8		83.1	74.9	93.7	91.6	107.3	0.482741	2.33667
O60613	SELENOF	Selenoprotein F	1.21587	0.0048339	99.9788	118.775	116.475	111.825	95.1798	100.579	85.0819	92.2804	86.4816	0.28199	2.3157
P00918	CA2	Carbonic anhydrase 2	0.809084	0.00485964	86.0139	78.0291	78.9387	85.7628	98.0417	98.0417	90.9665	112.293	108.553	-0.305639	2.3134
P04083	ANXA1	Annexin A1	1.3667	0.00490577	130.126	108.115	104.722	117.788	90.4678	82.1288	100.649	73.9838	74.1778	0.450699	2.30929
E7EMK3	FLOT2	Flotillin	1.33114	0.00495127	119.008	119.109	119.31	114.125	83.8697	76.117	112.766	82.3595	87.6957	0.412667	2.30528
P48163	ME1	NADP-dependent malic enzyme	1.18702	0.00536911	123.947	113.836	113.731	107.911	88.0871	90.6932	103.098	101.952	99.971	0.247344	2.2701
P08727	KRT19	Keratin, type I cytoskeletal 19	0.723621	0.00540272	76.2816	75.4972	74.4186	83.2574	93.6361	94.1263	127.855	106.088	112.854	-0.466693	2.26739
P13804	ETFA	Electron transfer flavoprotein subunit alpha, mitochondrial	1.10728	0.00545452	106.378	108.889	107.483	103.921	89.9038	93.1182	101.556	97.1363	99.9489	0.147025	2.26324
O60610	DIAPH1	Protein diaphanous homolog 1	1.09384	0.00553975	112.246	111.421	108.535	106.331	100.908	99.1558	96.579	106.886	97.6098	0.129406	2.25651
P55786	NPEPPS	Puromycin-sensitive aminopeptidase	0.917402	0.00562886	98.8453	93.1369	92.7363	96.3799	109.661	104.353	101.75	102.651	100.848	-0.124375	2.24958
Q14676	MDC1	Mediator of DNA damage checkpoint protein 1	0.878569	0.00563015	100.674	98.0499	101.409	88.1214	112.222	116.841	106.658	108.863	107.813	-0.186773	2.24948
P48681	NES	Nestin	1.70285	0.00563319	99.5536	113.328	106.709	153.922	75.4031	69.4997	82.6483	49.2848	70.7519	0.767954	2.24925
O15144	ARPC2	Actin-related protein 2/3 complex subunit 2	0.842347	0.00567725	93.6104	83.6122	82.632	88.3841	104.001	103.609	113.901	100.276	94.9827	-0.247514	2.24586
Q8WUM4	PDCD6IP	Programmed cell death 6-interacting protein	0.654273	0.00585539	69.5269	65.4588	64.1644	84.8211	128.052	120.655	112.057	90.1446	91.6239	-0.612034	2.23244
P13797	PLS3	Plastin-3	1.27108	0.00585857	112.787	106.274	100.328	127.176	89.2856	89.0969	97.5913	82.5845	80.6025	0.346051	2.23221
Q14764	MVP	Major vault protein	1.28417	0.00629515	106.502	103.716	99.8162	129.907	87.5597	88.6739	89.6953	80.6887	81.6172	0.360835	2.20099
P17040	ZSCAN20	Zinc finger and SCAN domain-containing protein 20	1.35186	0.00640979	122.3	114.3	100.5		85.7	74.3	97.4	76.8	81.4	0.434947	2.19316
B7ZLQ5	SMARCA1	Probable global transcription activator SNF2L1	1.15104	0.00654399	111.383	123.992	113.904	106.649	99.1935	92.4685	97.4072	102.871	103.186	0.202934	2.18416
A0A804HK65	HSD17B4	Peroxisomal multifunctional enzyme type 2	1.13102	0.00661417	110.079	112.7	112.296	105.558	91.6314	92.6395	95.6636	105.542	101.51	0.17762	2.17952
Q9Y6I4	USP3	Ubiquitin carboxyl-terminal hydrolase 3	1.16481	0.00661665	121.55	119.838	115.665	110.967	95.7636	92.5537	98.0106	111.385	104.538	0.220093	2.17936
A0A0C4DGP0	PITPNC1	Cytoplasmic phosphatidylinositol transfer protein 1	1.20604	0.0069463	115.3	115.3	110.3		96.9	82.5	98.3	90.7	102.7	0.270281	2.15825
P63092	GNAS	Guanine nucleotide-binding protein G(s) subunit alpha isoforms short	1.33484	0.00718934	112.337	125.681	109.747	124.317	78.775	69.9116	104.668	95.2072	93.5142	0.416672	2.14331
Q5T0N5	FNBP1L	Formin-binding protein 1-like	1.18239	0.0072048	110.831	119.017	115.448	106.314	90.0498	84.6972	103.589	99.3907	99.7055	0.241711	2.14238
B0QZ40	COMMD6	COMM domain-containing protein 6	0.746446	0.00726068	86.2105	93.163	98.8319	78.4585	127.604	128.353	94.8743	121.08	125.358	-0.42189	2.13902
Q8N392	ARHGAP18	Rho GTPase-activating protein 18	1.1648	0.00730863	98.7741	109.176	107.077	120.993	94.8613	93.1435	96.0065	91.8074	92.0937	0.220084	2.13616
O60701	UGDH	UDP-glucose 6-dehydrogenase	1.095	0.0073588	105.047	103.958	101.978	109.922	92.4731	93.0671	101.285	98.9086	94.7502	0.130934	2.13319
O14974	PPP1R12A	Protein phosphatase 1 regulatory subunit 12A	1.13546	0.00751745	97.142	102.255	101.772	111.38	87.3989	86.7236	91.4505	96.6597	91.9328	0.183277	2.12393
P51114	FXR1	RNA-binding protein FXR1	1.25496	0.00756042	110.503	118.361	122.041	115.43	83.35	84.8419	87.0301	97.6727	111.597	0.327642	2.12145
Q01995	TAGLN	Transgelin	0.454277	0.00772674	53.1825	53.7823	57.8809	59.8203	165.246	160.647	97.6678	98.0677	96.5682	-1.13836	2.112
Q9Y613	FHOD1	FH1/FH2 domain-containing protein 1	0.875245	0.00797136	96.1302	93.7553	96.1302	90.8768	119.156	103.152	101.706	106.352	107.901	-0.192241	2.09847
P57678	GEMIN4	Gem-associated protein 4	0.925886	0.00809904	97.1453	96.7392	99.5815	101.204	107.601	106.992	100.292	110.849	107.093	-0.111093	2.09157
P54920	NAPA	Alpha-soluble NSF attachment protein	1.17188	0.00817098	111	112.694	109.705	109.942	86.1895	85.6913	98.8439	96.054	106.118	0.22882	2.08773
Q9NPQ8	RIC8A	Synembryn-A	0.589315	0.00825252	57.6689	68.3555	71.2437	81.0583	146.05	144.317	96.179	100.415	103.4	-0.762889	2.08341
P51531	SMARCA2	Probable global transcription activator SNF2L2	1.40463	0.00856833	105.4	134.7	115.3		86.1	86.3	83.9	97.4	68	0.490192	2.0671
Q9NQS1	AVEN	Cell death regulator Aven	1.15898	0.00860213	98.2516	111.003	106.456	116.867	89.1579	90.4429	96.0771	91.2337	99.6355	0.212861	2.06539
Q9NRN9	METTL5	rRNA N6-adenosine-methyltransferase METTL5	0.826162	0.00899711	112.712	98.3022	94.0573	84.0884	120.867	115.84	122.766	110.925	118.409	-0.275504	2.0459
A0A6Q8PFJ0	LMNA	Prelamin-A/C	1.31082	0.00902233	107.597	110.334	108.575	115.088	71.6339	68.1157	101.441	86.7816	93.1338	0.390466	2.04468
P05783	KRT18	Keratin, type I cytoskeletal 18	0.763541	0.00911785	79.5203	83.6421	84.7479	84.0604	95.4043	93.3936	115.209	112.897	126.569	-0.389223	2.04011
Q05086	UBE3A	Ubiquitin-protein ligase E3A	0.749908	0.00914529	82.1318	79.2725	81.0473	85.0103	125.12	123.839	90.3154	103.232	103.33	-0.415214	2.0388
P15311	EZR	Ezrin	0.828002	0.0091951	88.5321	78.9482	77.3351	90.265	103.145	103.62	109.787	100.678	88.627	-0.272294	2.03644
Q96HC4	PDLIM5	PDZ and LIM domain protein 5	0.698782	0.0093951	65.8992	74.8316	71.6414	76.5338	96.2511	100.717	132.983	94.1547	92.6964	-0.517085	2.0271
A0A087WX23	PEG10	Retrotransposon-derived protein PEG10	0.747087	0.00940224	78.5219	74.892	70.1157	101.841	103.645	95.5255	118.643	112.147	114.44	-0.420653	2.02677
P00403	MT-CO2	Cytochrome c oxidase subunit 2	0.813416	0.00944132	92.9342	89.0956	90.8129	85.3423	123.34	120.612	102.228	99.1971	105.056	-0.297934	2.02497
Q86YT6	MIB1	E3 ubiquitin-protein ligase MIB1	1.32302	0.00944351	97.1268	133.103	123.319	111.48	90.4003	77.8645	80.922	92.1328	98.044	0.403835	2.02487
Q709F0	ACAD11	Acyl-CoA dehydrogenase family member 11	0.882438	0.00945685	87.4448	87.3471	87.9333	97.5945	109.037	97.9968	105.422	97.0198	100.928	-0.180434	2.02425
Q8NBJ5	COLGALT1	Procollagen galactosyltransferase 1	1.16959	0.00964688	124.839	107.894	108.813	107.825	101.872	99.5238	87.2747	95.6449	95.9512	0.225997	2.01561
P60709	ACTB	Actin, cytoplasmic 1	1.10027	0.00972191	108.175	115.101	114.388	104.801	96.8685	101.35	96.5629	103.591	104.304	0.137861	2.01225
P08133	ANXA6	Annexin A6	1.20362	0.00974167	118.927	100.875	99.9822	110.004	89.4682	80.7396	97.5025	93.6341	85.0047	0.267381	2.01137
F8VVT9	AGAP2	Arf-GAP with GTPase, ANK repeat and PH domain-containing protein 2	1.31459	0.00977788	136.24	116.144	112.743	111.316	89.8649	79.3532	110.167	80.4868	93.1627	0.394613	2.00976
Q86VI3	IQGAP3	Ras GTPase-activating-like protein IQGAP3	1.25397	0.00978784	102.408	107.411	106.656	125.326	83.6255	75.7915	99.7654	90.7988	90.4213	0.326499	2.00931
Q6P2I3	FAHD2B	Fumarylacetoacetate hydrolase domain-containing protein 2B	1.22102	0.0100334	102.06	116.307	112.139	133.405	90.7196	99.2488	97.0195	92.2703	95.6626	0.288091	1.99855
Q9NZM1	MYOF	Myoferlin	0.84621	0.0100479	85.5607	93.276	93.4738	94.6396	115.136	109.992	93.276	110.883	112.762	-0.240912	1.99793
P61158	ACTR3	Actin-related protein 3	0.802244	0.0102314	90.1617	79.5771	77.0753	87.2241	114.121	110.946	109.599	93.3371	92.4711	-0.317887	1.99007
P32121	ARRB2	Beta-arrestin-2	0.770064	0.0103296	70.174	80.5417	80.5417	95.3092	117.885	114.621	93.2133	106.461	97.9172	-0.37695	1.98592
Q58WW2	DCAF6	DDB1- and CUL4-associated factor 6	1.38658	0.0104249	84.6601	102.15	101.305	130.733	75.1971	74.0987	75.2815	76.042	76.9714	0.471531	1.98193
P28070	PSMB4	Proteasome subunit beta type-4	1.05854	0.0104399	99.3273	104.513	102.618	98.4852	93.1443	96.3356	98.6293	95.438	94.6402	0.0820742	1.9813
P04080	CSTB	Cystatin-B	1.54567	0.010474	100.266	119.495	135.585	127.36	61.8078	64.2605	69.4602	83.4896	111.352	0.628228	1.97989
P50502	ST13	Hsc70-interacting protein	1.1806	0.0105823	93.1576	110.42	106.659	115.573	91.9039	91.8075	89.5894	94.2184	83.3211	0.23952	1.97542
Q8TBZ6	TRMT10A	tRNA methyltransferase 10 homolog A	1.43778	0.0108647	98.1125	131.67	125.864	130.847	72.0345	70.2631	110.512	82.5641	87.5829	0.523838	1.96398
Q9UPY3	DICER1	Endoribonuclease Dicer	1.30534	0.0109944	130.686	141.937	128.09	107.667	91.0907	84.1669	114.783	94.0117	102.775	0.384427	1.95883
Q6YHK3	CD109	CD109 antigen	0.807909	0.0110741	99.8808	93.0948	89.8079	82.0725	113.029	102.85	130.948	109.105	108.575	-0.307735	1.95569
Q9BRV8	SIKE1	Suppressor of IKBKE 1	1.35506	0.0111066	98.6166	119.415	125.783	129.977	79.7093	75.9278	81.202	91.5513	108.667	0.438359	1.95442
Q8N3C0	ASCC3	Activating signal cointegrator 1 complex subunit 3	0.943476	0.0111088	98.9202	99.0213	98.4144	102.839	109.642	107.416	105.191	101.752	104.888	-0.083942	1.95433
P14210	HGF	Hepatocyte growth factor	1.89922	0.0111133	98.1	160.3	148.3		59.1	48.8	96.9	77.8	74.3	0.925411	1.95416
Q7Z4H7	HAUS6	HAUS augmin-like complex subunit 6	2.16012	0.0114434	193.058	231.742	181.211	101.762	80.8738	59.7185	130.317	63.5869	75.0712	1.11111	1.94145
P02794	FTH1	Ferritin heavy chain	1.63173	0.01152	110.926	103.264	94.2404	156.422	69.8077	65.3809	89.473	67.5943	63.8485	0.706403	1.93855
Q5UIP0	RIF1	Telomere-associated protein RIF1	1.25079	0.0118168	100.988	123.698	110.168	111.128	85.0422	75.2816	103.21	92.8699	89.2943	0.322845	1.9275
Q14694	USP10	Ubiquitin carboxyl-terminal hydrolase 10	1.13282	0.0118588	97.7788	102.625	101.865	115.047	95.0232	92.3625	88.0865	89.9869	95.0232	0.179923	1.92596
P37802	TAGLN2	Transgelin-2	1.12463	0.0120872	105.37	105.273	100.223	111.852	92.9392	99.3488	99.8344	90.3171	87.4036	0.169444	1.91768
Q15121	PEA15	Astrocytic phosphoprotein PEA-15	0.868968	0.012307	84.074	83.7797	83.9759	91.8909	104.185	95.2578	91.8242	95.2578	107.913	-0.202624	1.90985
A0A1B0GTF3	HSPA12A	Heat shock 70 kDa protein 12A	0.871902	0.0123149	90.0658	91.294	94.1597	86.4259	115.039	105.827	95.2855	101.529	101.222	-0.197762	1.90957
P34059	GALNS	N-acetylgalactosamine-6-sulfatase	1.18196	0.0124632	103.161	110.486	116.183	112.876	86.5779	83.2205	93.4959	102.245	102.652	0.241176	1.90437
P11717	IGF2R	Cation-independent mannose-6-phosphate receptor	1.13335	0.0125357	108.849	109.551	105.94	104.17	94.2022	91.9951	106.843	90.1893	89.3867	0.180588	1.90185
F5H269	DMXL1	DmX-like protein 1	1.36313	0.0127272	111.024	132.738	122.353	132.279	83.1738	65.2362	110.458	97.5238	100.639	0.446925	1.89527
P02792	FTL	Ferritin light chain	1.80534	0.0129651	187.261	116.266	104.214	125.419	66.4378	66.2353	100.771	69.2736	66.4378	0.852272	1.88722
P05164	MPO	Myeloperoxidase	1.22176	0.0132247	90.1	89.9	82.8		68.7	61	79.4	74.4	75	0.288958	1.87862
P61163	ACTR1A	Alpha-centractin	1.10246	0.0132882	112.874	100.742	100.841	106.468	96.4653	98.3548	98.0565	92.6863	91.6918	0.140732	1.87653
Q86XZ4	SPATS2	Spermatogenesis-associated serine-rich protein 2	1.18288	0.0133306	98.8032	117.265	119.396	109.756	92.8182	89.8765	88.2534	94.8471	104.687	0.242308	1.87515
P61962	DCAF7	DDB1- and CUL4-associated factor 7	0.890849	0.0136603	83.392	84.5278	85.1904	96.8691	101.85	100.525	95.8866	93.4255	99.3888	-0.166747	1.86454
P09622	DLD	Dihydrolipoyl dehydrogenase, mitochondrial	0.884236	0.013747	92.2245	93.4597	98.9149	86.1539	100.356	102.209	103.753	102.929	114.869	-0.177497	1.86179
O95971	CD160	CD160 antigen	1.56143	0.0140168	156.8	118.1	106.4		95.4	84.3	89.1	64.5	73.7	0.642863	1.85335
E7EVH7	E7EVH7	Kinesin light chain	1.07241	0.0141493	99.4	104.2	101.2		99.2	92.8	95.7	91.8	94.2	0.100855	1.84927
P14902	IDO1	Indoleamine 2,3-dioxygenase 1	0.70557	0.0144152	83.7	78.4	77.3		126.2	101.5	93.7	111.8	132.3	-0.503138	1.84118
Q00613	HSF1	Heat shock factor protein 1	1.45485	0.014598	96.0974	117.683	98.8972	140.383	82.1885	67.5572	96.8199	76.4986	66.2024	0.540873	1.83571
A0A087WT44	HMOX2	Heme oxygenase (biliverdin-producing)	1.07422	0.0146977	99.4405	110.903	106.278	105.132	96.5246	99.2394	96.4241	97.9323	100.647	0.103286	1.83275
Q14191	WRN	Bifunctional 3'-5' exonuclease/ATP-dependent helicase WRN	0.873028	0.0147451	84.0939	91.402	98.2096	93.0962	112.826	106.619	97.2085	99.8114	108.721	-0.195901	1.83135
Q13608	PEX6	Peroxisome assembly factor 2	1.42294	0.0150101	124.729	102.199	100.019	115.658	73.7653	51.0543	98.929	80.306	84.7574	0.508876	1.82362
Q13308	PTK7	Inactive tyrosine-protein kinase 7	0.920759	0.0150237	86.2125	92.4878	92.4878	95.0488	102.432	101.659	101.852	94.4186	96.8322	-0.119104	1.82322
Q96BZ8	LENG1	Leukocyte receptor cluster member 1	1.22996	0.0150615	96.8846	127.94	117.186	120.998	90.955	86.1309	103.92	96.5831	92.965	0.298609	1.82213
A0A804HL01	ADD1	Alpha-adducin	1.15338	0.0151709	118.494	100.616	99.0265	112.972	98.0332	95.6495	90.0873	92.0738	91.3785	0.205868	1.81899
Q14573	ITPR3	Inositol 1,4,5-trisphosphate receptor type 3	1.17821	0.0153256	107.275	108.651	108.946	112.668	91.7392	77.6784	91.4442	104.325	99.0154	0.236593	1.81458
P33176	KIF5B	Kinesin-1 heavy chain	1.03546	0.0157585	103.033	101.038	100.539	102.967	96.6495	97.1482	99.9409	97.4474	100.839	0.0502723	1.80249
Q16222	UAP1	UDP-N-acetylhexosamine pyrophosphorylase	1.14381	0.0158035	114.79	99.3678	96.9275	110.229	89.6067	89.4115	91.2661	98.2941	91.8518	0.193845	1.80125
P22234	PAICS	Bifunctional phosphoribosylaminoimidazole carboxylase/phosphoribosylaminoimidazole succinocarboxamide synthetase	0.856142	0.0161246	94.7246	89.4064	92.0153	92.7108	116.6	118.506	97.7349	105.963	99.7418	-0.224078	1.79251
Q9Y5X3	SNX5	Sorting nexin-5	0.903655	0.0162431	95.5811	91.4921	97.2167	94.677	103.248	97.3189	101.919	109.688	112.039	-0.146156	1.78933
Q99590	SCAF11	Protein SCAF11	0.859038	0.0162677	80.7	89.6	88.7		104.7	102.8	94.5	93.2	107.3	-0.219206	1.78867
P35240	NF2	Merlin	1.47481	0.0164732	118.66	114.671	100.94	127.438	82.5703	66.2418	113.836	65.5923	63.0874	0.560533	1.78322
Q9P031	CCDC59	Thyroid transcription factor 1-associated protein 26	0.697134	0.017129	69.0417	61.9483	62.7995	87.719	110.467	80.9584	108.481	118.6	86.2548	-0.520493	1.76627
Q96FQ6	S100A16	Protein S100-A16	1.36195	0.0175141	126.267	140.406	140.297	122.193	77.0536	79.6842	90.8641	114.758	123.308	0.445671	1.75661
Q8NF37	LPCAT1	Lysophosphatidylcholine acyltransferase 1	1.10552	0.0178429	110.128	115.05	113.717	112.004	98.7458	96.7975	96.4899	111.461	106.334	0.14472	1.74854
P17676	CEBPB	CCAAT/enhancer-binding protein beta	1.58685	0.017859	106.726	114.774	97.8028	144.127	77.1575	71.0339	106.726	56.1623	53.9753	0.666166	1.74814
Q9HCU5	PREB	Prolactin regulatory element-binding protein	1.04433	0.0180355	102.275	106.162	101.677	105.045	100.879	101.278	99.2843	99.5834	95.8951	0.0625786	1.74387
Q14498	RBM39	RNA-binding protein 39	1.05013	0.018439	103.09	100.788	101.489	99.7479	95.2834	96.7847	99.8874	92.2808	97.9858	0.0705624	1.73426
Q9Y2T3	GDA	Guanine deaminase	0.882757	0.018449	89.8099	91.0291	88.4892	92.707	107.792	105.659	109.723	91.5371	97.9375	-0.179911	1.73403
P49406	MRPL19	39S ribosomal protein L19, mitochondrial	0.92835	0.0189324	95.242	97.3562	100.075	93.0761	107.927	106.518	104.404	97.3562	103.196	-0.107259	1.72279
O60568	PLOD3	Multifunctional procollagen lysine hydroxylase and glycosyltransferase LH3	1.26963	0.0192395	126.443	113.304	111.99	104.49	81.8698	80.1516	113.607	85.0031	88.5407	0.344411	1.71581
A0A0A0MT35	PRXL2B	Prostamide/prostaglandin F synthase	1.28742	0.0194709	108.465	130.489	112.498	101.468	71.2416	81.1678	103.709	95.6436	87.9921	0.364487	1.71061
P05165	PCCA	Propionyl-CoA carboxylase alpha chain, mitochondrial	1.55226	0.0197735	140.248	107.178	93.8385	137.047	69.9389	65.4924	112.18	66.3261	71.2357	0.634373	1.70392
O60437	PPL	Periplakin	0.900346	0.0198374	86.9064	93.8918	95.33	84.6534	99.9526	95.4327	96.5627	101.494	107.452	-0.151449	1.70251
Q10472	GALNT1	Polypeptide N-acetylgalactosaminyltransferase 1	1.47301	0.0202753	148.2	117.3	113.3		82.7	72.3	115.3	80.8	77.5	0.55877	1.69303
A0A2R8Y5A6	ATXN2	Ataxin-2	0.736213	0.0203331	73.3502	72.485	71.8121	82.2691	121.706	116.514	100.364	81.5216	89.1162	-0.441805	1.6918
O00159	MYO1C	Unconventional myosin-Ic	1.04324	0.0204367	103.465	105.857	103.864	102.432	101.671	102.568	96.1888	99.0794	98.4813	0.0610758	1.68959
Q9BZK7	TBL1XR1	F-box-like/WD repeat-containing protein TBL1XR1	1.17274	0.0205311	104.002	101.796	100.548	106.094	87.3082	82.607	105.058	81.5516	83.0867	0.229885	1.68759
Q9UKG1	APPL1	DCC-interacting protein 13-alpha	1.15852	0.0209254	101.808	114.376	102.295	125.227	92.3579	95.2806	98.3982	93.7218	98.9827	0.212287	1.67933
Q8IXB1	DNAJC10	DnaJ homolog subfamily C member 10	0.809068	0.021077	91.2928	85.2724	79.252	84.5393	115.868	115.374	111.821	91.4901	91.2928	-0.305667	1.67619
Q15691	MAPRE1	Microtubule-associated protein RP/EB family member 1	0.960927	0.0215539	94.8807	96.4854	96.4854	97.4282	102.804	103.005	98.4914	97.9899	98.8925	-0.057502	1.66647
P51636	CAV2	Caveolin-2	0.588164	0.0219207	64.2	60.7	70.5		151.3	117.3	93.7	96.5	94.9	-0.765708	1.65915
Q96C86	DCPS	m7GpppX diphosphatase	1.16703	0.0226795	107.448	94.7733	95.6246	114.457	85.0311	81.9099	96.8542	89.7603	88.0578	0.222846	1.64437
F5H5R8	NAT1	Arylamine N-acetyltransferase	1.33278	0.0227384	141.639	130.528	118.23	95.3258	91.2617	72.8152	102.912	96.979	91.5853	0.414442	1.64324
O94927	HAUS5	HAUS augmin-like complex subunit 5	1.53769	0.0229334	144.794	91.7294	89.1518	137.498	74.8413	66.6638	93.0627	71.3747	70.5748	0.620763	1.63953
O43707	ACTN4	Alpha-actinin-4	1.10917	0.0230215	111.78	102.366	101.375	104.965	90.4747	89.1864	103.654	94.0421	96.5195	0.149474	1.63787
Q6ZSZ5	ARHGEF18	Rho guanine nucleotide exchange factor 18	1.21495	0.0236429	118.351	108.822	101.701	119.557	86.5565	74.922	102.905	98.4919	98.4919	0.280902	1.6263
O15240	VGF	Neurosecretory protein VGF	2.30182	0.0239742	206.4	180.7	122.8		77.3	51.9	149.6	46	44.4	1.20278	1.62026
Q9UK99	FBXO3	F-box only protein 3	1.20716	0.0241231	97.8886	99.8864	97.1622	125.817	90.6242	84.5402	90.9874	84.177	85.3574	0.271616	1.61757
P80303	NUCB2	Nucleobindin-2	1.34675	0.024329	96.2675	114.735	100.29	126.039	72.4977	67.8352	107.238	77.526	80.8172	0.42948	1.61388
Q7Z7A1	CNTRL	Centriolin	1.23205	0.0243573	105.8	116.8	108.5		81.4	75.1	93.7	96.3	101.4	0.301056	1.61337
Q6FI81	CIAPIN1	Anamorsin	1.18457	0.024536	98.1551	101.3	101.872	117.614	97.2022	93.6762	91.7703	82.1454	77.2853	0.244368	1.6102
Q14376	GALE	UDP-glucose 4-epimerase	0.838826	0.0246454	88.1768	87.1894	87.9793	92.6806	118.491	118.787	94.4963	98.446	100.322	-0.253556	1.60826
H3BP20	HEXA	Beta-hexosaminidase	0.799959	0.0247408	99.5482	89.1719	92.4145	69.2225	117.599	110.465	121.058	99.0078	99.3321	-0.322003	1.60659
P10644	PRKAR1A	cAMP-dependent protein kinase type I-alpha regulatory subunit	1.12935	0.0251579	111.641	100.477	103.468	107.058	87.4193	87.1202	105.063	93.2007	94.9949	0.175489	1.59933
Q66K14	TBC1D9B	TBC1 domain family member 9B	0.92138	0.0252553	99.9669	97.7824	103.088	93.203	112.97	106.104	109.953	104.232	101.319	-0.118132	1.59765
P11498	PC	Pyruvate carboxylase, mitochondrial	1.12331	0.0253156	94.2258	99.6255	100.255	103.07	96.1157	95.6657	83.9662	83.9662	82.2563	0.16776	1.59661
Q9P2K6	KLHL42	Kelch-like protein 42	1.27522	0.0253988	108.7	117.3	114.1		91.6	84.6	109.4	86.8	72.1	0.350741	1.59519
E9PRY8	EEF1D	Elongation factor 1-delta	1.15277	0.0255245	105.853	106.822	101.98	112.979	88.5178	94.2318	107.79	88.3241	84.8377	0.205106	1.59304
P31150	GDI1	Rab GDP dissociation inhibitor alpha	1.35703	0.0257085	124.492	121.896	111.928	110.825	72.6806	69.6696	121.584	84.1019	84.1019	0.440456	1.58992
P57723	PCBP4	Poly(rC)-binding protein 4	2.35925	0.0257949	174.133	125.583	113.152	204.545	38.4679	37.8806	154.557	45.8091	50.4095	1.23833	1.58847
Q9C075	KRT23	Keratin, type I cytoskeletal 23	0.777208	0.02585	96.6597	79.5724	87.1555	66.5325	115.365	102.928	120.926	101.917	89.481	-0.363627	1.58754
Q12765	SCRN1	Secernin-1	1.0731	0.0260024	107.144	103.822	106.625	97.1254	100.188	93.2323	98.9425	96.2431	94.4782	0.101781	1.58499
Q9BZF1	OSBPL8	Oxysterol-binding protein-related protein 8	0.832202	0.0263884	97.6573	106.739	102.465	74.9142	122.018	118.492	114.646	109.09	109.197	-0.264995	1.57859
P10412	H1-4	Histone H1.4	1.62613	0.0264392	96.6929	115.558	101.666	162.334	54.148	53.9112	98.5084	82.406	77.1175	0.701446	1.57775
Q93009	USP7	Ubiquitin carboxyl-terminal hydrolase 7	1.02849	0.0265331	101.103	102.309	101.505	100.599	100.098	100.902	98.1888	97.0833	96.5808	0.0405319	1.57621
Q13595	TRA2A	Transformer-2 protein homolog alpha	0.919348	0.0266237	92.9665	89.9519	87.3263	92.0134	99.1902	102.886	104.052	93.55	92.8693	-0.121317	1.57473
Q96GG9	DCUN1D1	DCN1-like protein 1	1.22443	0.0268116	122.199	128.816	128.706	101.559	91.4287	96.1711	85.032	109.626	109.075	0.292105	1.57168
A0A6Q8PH57	KIF2A	Kinesin-like protein	1.13595	0.026856	95.1488	101.454	99.5721	113.84	87.9961	83.5728	88.6549	94.6782	96.2781	0.183903	1.57096
Q5VZL5	ZMYM4	Zinc finger MYM-type protein 4	1.25769	0.0268934	102.356	94.8339	90.8042	122.418	89.64	80.1477	91.1624	73.9687	72.9836	0.330779	1.57035
Q99836	MYD88	Myeloid differentiation primary response protein MyD88	1.60846	0.0270075	125.728	138.009	135.085	119.513	51.5583	39.6678	86.5479	111.791	113.253	0.685684	1.56851
P11047	LAMC1	Laminin subunit gamma-1	1.15013	0.0274447	101.331	107.221	105.923	101.27	85.5572	80.5656	105.025	92.4457	88.2527	0.201797	1.56154
A0A0A0MRF6	AKAP9	A-kinase anchor protein 9	1.14818	0.0278601	96.8828	96.6023	96.1347	108.778	94.6384	91.7394	89.495	77.1509	80.7045	0.199347	1.55502
Q15424	SAFB	Scaffold attachment factor B1	0.851872	0.0279197	80.3745	86.1009	95.7131	84.4412	101.337	93.9747	94.1793	102.667	116.471	-0.231291	1.55409
P28290	ITPRID2	Protein ITPRID2	1.12038	0.0280969	98.2853	109.052	108.855	107.632	90.8768	85.6415	100.261	93.8402	102.236	0.163994	1.55134
A0A2Y9D025	NDUFA6	NADH dehydrogenase [ubiquinone] 1 alpha subcomplex subunit 6	0.85027	0.0280973	85.8588	91.3754	93.7827	84.447	109.229	106.822	85.9591	109.129	111.436	-0.234007	1.55134
Q8TAE8	GADD45GIP1	Growth arrest and DNA damage-inducible proteins-interacting protein 1	0.899717	0.0281362	95.6911	98.1955	100.387	84.9572	107.9	109.361	98.2999	102.891	108.422	-0.152456	1.55073
Q5THK1	PRR14L	Protein PRR14L	0.753313	0.0282221	68.6	83.1	89.3		128.5	103.2	92.7	101.1	107.7	-0.408678	1.54941
Q14494	NFE2L1	Endoplasmic reticulum membrane sensor NFE2L1	1.44979	0.0284403	141.5	123	100.5		82.3	70.2	112.5	75.3	79.3	0.535847	1.54607
Q9Y3L3	SH3BP1	SH3 domain-binding protein 1	0.885837	0.0284456	87.6811	88.2722	91.4248	97.4846	109.946	110.439	93.1981	98.124	103.148	-0.174886	1.54598
P10620	MGST1	Microsomal glutathione S-transferase 1	1.0718	0.028846	112.488	106.806	106.496	107.575	97.2	98.1296	100.092	108.872	101.125	0.100031	1.53991
A0A8Q3SHX7	NOL10	Nucleolar protein 10	0.898422	0.0291875	94.6132	96.3409	98.475	93.603	115.04	113.82	99.1864	105.386	99.4913	-0.154535	1.5348
Q9BZE4	GTPBP4	GTP-binding protein 4	0.875855	0.0292999	90.8181	97.092	101.926	89.2338	114.268	114.474	94.315	107.686	110.257	-0.191237	1.53313
Q9Y2V7	COG6	Conserved oligomeric Golgi complex subunit 6	0.820959	0.0295167	89	89.3	90.4		117.8	124.2	97.3	105.9	100.3	-0.284617	1.52993
Q68CZ6	HAUS3	HAUS augmin-like complex subunit 3	1.21196	0.0295312	111.956	113.647	101.019	120.493	99.7268	103.107	100.224	82.1279	75.9634	0.277343	1.52972
Q9UGR2	ZC3H7B	Zinc finger CCCH domain-containing protein 7B	1.12027	0.0296723	111.113	103.858	100.677	107.885	87.3598	96.4039	105.448	88.6518	94.7143	0.163851	1.52765
Q2TB90	HKDC1	Hexokinase HKDC1	3.43125	0.0300828	433.23	250.721	231.799	75.3326	73.8581	54.7832	92.6279	66.2282	73.5529	1.77873	1.52168
Q9H5N1	RABEP2	Rab GTPase-binding effector protein 2	1.37388	0.0302777	118.6	119.2	102.4		90.3	75.5	108.6	66.3	72	0.458255	1.51888
E7EX59	PCCB	Propionyl-CoA carboxylase beta chain, mitochondrial	1.06569	0.0304753	98.0117	104.991	104.795	108.492	98.5032	96.2422	98.5032	93.8828	101.158	0.0917813	1.51605
Q86WB0	ZC3HC1	Zinc finger C3HC-type protein 1	1.11017	0.0305913	97.0807	98.1934	94.1136	112.319	87.623	90.8683	92.7227	91.2392	89.8483	0.150785	1.5144
Q7L3B6	CDC37L1	Hsp90 co-chaperone Cdc37-like 1	1.40673	0.0315397	122.967	92.4697	88.6464	125.381	75.6651	69.9746	102.872	68.8188	64.2842	0.492348	1.50114
O75717	WDHD1	WD repeat and HMG-box DNA-binding protein 1	0.897861	0.0315609	84.1872	93.5304	92.4486	97.7444	110.348	105.136	98.7429	94.9073	103.07	-0.155436	1.50085
P35606	COPB2	Coatomer subunit beta'	1.0799	0.0315866	102.888	108.053	108.762	107.06	96.5082	97.6221	91.8499	102.382	105.622	0.110896	1.5005
Q16658	FSCN1	Fascin	1.16278	0.0319806	111.055	98.2667	98.0744	110.211	96.2475	99.9974	90.6707	83.1709	78.8441	0.217583	1.49511
Q6PD74	AAGAB	Alpha- and gamma-adaptin-binding protein p34	1.06255	0.0320103	102.498	107.148	107.451	106.856	96.1299	96.5342	98.9602	100.78	106.339	0.0875355	1.49471
P26447	S100A4	Protein S100-A4	2.10404	0.032264	246.976	145.946	127.281	108.947	68.6378	57.3186	126.559	53.8265	67.4336	1.07316	1.49128
P51687	SUOX	Sulfite oxidase, mitochondrial	1.54796	0.0323805	104.559	101.493	91.1909	137.493	65.4769	55.7703	110.178	60.283	59.3464	0.63037	1.48972
Q92890	UFD1	Ubiquitin recognition factor in ER-associated degradation protein 1	1.15941	0.0324259	96.0073	100.334	97.1119	116.788	88.8275	87.0786	98.2165	80.8192	87.3547	0.213386	1.48911
P21980	TGM2	Protein-glutamine gamma-glutamyltransferase 2	0.898399	0.0328399	87.5036	88.6874	86.813	99.2367	106.346	101.611	92.3375	98.3552	105.359	-0.154572	1.4836
Q8IXJ6	SIRT2	NAD-dependent protein deacetylase sirtuin-2	1.29065	0.0331131	109.578	86.4467	92.9779	123.008	91.3451	67.4883	87.4445	74.1102	78.6457	0.368098	1.48
P35613	BSG	Basigin	1.28432	0.033413	96.0864	124.79	112.179	116.186	79.9936	74.9116	114.061	83.0051	85.2637	0.361009	1.47608
Q99816	TSG101	Tumor susceptibility gene 101 protein	1.10079	0.0334344	116.136	116.028	115.813	99.9998	100.45	99.591	98.3017	105.93	104.425	0.138544	1.47581
P55809	OXCT1	Succinyl-CoA:3-ketoacid coenzyme A transferase 1, mitochondrial	0.931017	0.0338262	91.3043	98.7866	98.8877	95.8541	104.954	110.01	101.314	98.5844	101.82	-0.103121	1.47075
O00151	PDLIM1	PDZ and LIM domain protein 1	0.778072	0.0338801	75.7192	78.9453	74.2959	83.6582	115.666	117.849	97.9225	79.4197	91.3754	-0.362024	1.47006
Q96LJ7	DHRS1	Dehydrogenase/reductase SDR family member 1	1.56831	0.0340314	97.4599	123.064	139.674	142.384	61.7613	53.2267	66.6251	94.8904	124.073	0.649208	1.46812
Q8IVM0	CCDC50	Coiled-coil domain-containing protein 50	2.2154	0.0340383	136.929	91.8625	82.3459	216.461	67.9531	60.1668	73.5372	44.0437	51.9873	1.14757	1.46803
P80217	IFI35	Interferon-induced 35 kDa protein	1.23292	0.0340934	124.579	106.694	106.28	119.796	84.3624	82.6048	117.239	88.4978	90.979	0.302084	1.46733
Q8WWX9	SELENOM	Selenoprotein M	1.38091	0.0341749	105.8	118.6	127.4		80.8	62	74.8	101.5	105.5	0.465617	1.46629
A0A494C0X0	TBCB	Tubulin-folding cofactor B	0.797459	0.0342975	81.1684	74.3962	83.8184	92.3525	115.128	115.913	80.3832	101.583	106.981	-0.326517	1.46474
P62330	ARF6	ADP-ribosylation factor 6	0.852812	0.03445	87.8732	84.9179	89.3509	94.0046	115.063	98.8081	117.723	94.4736	95.9513	-0.229701	1.46281
Q5T447	HECTD3	E3 ubiquitin-protein ligase HECTD3	1.2199	0.0344719	110.169	112.233	103.29	116.266	83.1427	74.7891	110.267	99.8498	84.8134	0.286762	1.46253
A0A7P0TBE7	WDR62	WD repeat-containing protein 62	1.17374	0.0346139	106.784	112.88	106.885	105.438	90.2226	73.5599	98.1476	93.2707	104.853	0.231112	1.46075
Q9NYL2	MAP3K20	Mitogen-activated protein kinase kinase kinase 20	1.34089	0.0347893	134.396	109.857	98.3479	121.228	79.3251	82.0834	117.656	72.7622	80.5615	0.423192	1.45855
Q6ZU80	CEP128	Centrosomal protein of 128 kDa	1.16095	0.0348424	104.099	118.926	119.343	106.332	89.4815	87.3932	110.677	94.7021	100.862	0.215309	1.45789
O15305	PMM2	Phosphomannomutase 2	1.09489	0.0355407	114.596	108.305	107.571	111.073	95.9335	92.2639	108.305	105.999	101.595	0.13079	1.44927
P04040	CAT	Catalase	1.05443	0.0356339	105.467	103.265	104.418	102.232	100.225	98.0232	103.999	96.4506	93.7249	0.0764692	1.44814
Q9H008	LHPP	Phospholysine phosphohistidine inorganic pyrophosphate phosphatase	1.18127	0.0356939	99.4728	118.877	107.745	131.761	95.1834	101.822	92.8344	103.66	90.9961	0.240338	1.44741
O43175	PHGDH	D-3-phosphoglycerate dehydrogenase	1.13517	0.0360075	93.1049	108.897	109.866	111.596	96.9802	97.3678	82.7384	93.3955	95.8176	0.182908	1.44361
F8WAR4	CHCHD3	MICOS complex subunit MIC19	1.34398	0.0362228	104.915	87.1433	87.0574	131.481	72.6337	63.4472	79.2446	82.1636	84.3959	0.426513	1.44102
Q15785	TOMM34	Mitochondrial import receptor subunit TOM34	0.896953	0.0363904	85.2655	96.2019	88.2657	96.5334	104.332	109.655	92.137	101.815	102.493	-0.156895	1.43901
Q8IUI8	CRLF3	Cytokine receptor-like factor 3	0.914343	0.0368189	89.5715	91.4214	91.1293	96.4239	109.336	102.228	99.9891	99.9891	92.2976	-0.129192	1.43393
Q8TED1	GPX8	Probable glutathione peroxidase 8	1.37081	0.0368351	109.362	130.021	143.691	95.41	104.325	75.2375	66.7064	87.8798	102.167	0.455026	1.43374
Q32P28	P3H1	Prolyl 3-hydroxylase 1	1.22662	0.0368474	105.008	118.898	129.057	110.887	86.2454	82.0989	87.5929	101.38	115.374	0.294691	1.43359
Q5TAQ9	DCAF8	DDB1- and CUL4-associated factor 8	0.919885	0.0372929	91.6444	103.443	99.5781	95.9879	98.561	107.817	105.376	111.886	107.207	-0.120475	1.42837
P12270	TPR	Nucleoprotein TPR	1.31042	0.0375096	102.189	104.388	97.2398	122.679	91.6492	88.8997	99.4394	65.6208	61.2217	0.390031	1.42586
A0A2R8YE63	EPS8	Epidermal growth factor receptor kinase substrate 8	0.703008	0.0375192	90.1769	93.4831	95.3071	67.7102	103.515	103.173	109.216	139.313	161.201	-0.508388	1.42575
P50416	CPT1A	Carnitine O-palmitoyltransferase 1, liver isoform	1.20431	0.0375545	119.04	109.599	103.175	107.249	87.4064	79.9116	113.881	87.3091	87.2117	0.268207	1.42534
E9PF18	HADH	Hydroxyacyl-coenzyme A dehydrogenase, mitochondrial	0.961878	0.037557	96.681	97.4867	99.9037	93.6415	99.803	101.112	98.8966	100.105	103.932	-0.0560746	1.42531
Q14203	DCTN1	Dynactin subunit 1	1.15914	0.0380742	108.617	119.026	115.934	104.703	88.3159	82.9572	107.071	103.465	101.61	0.213054	1.41937
Q96JB5	CDK5RAP3	CDK5 regulatory subunit-associated protein 3	1.07265	0.0380754	98.026	104.36	105.365	98.1741	100.841	96.7189	91.692	91.5914	92.1947	0.101186	1.41936
Q13619	CUL4A	Cullin-4A	1.2399	0.038326	113.461	113.461	99.2547	129.45	84.0066	80.8812	113.84	94.7087	85.9008	0.310227	1.41651
Q8NDH3	NPEPL1	Probable aminopeptidase NPEPL1	1.70423	0.0383516	97.976	94.1526	89.6122	175.686	68.6629	66.4325	80.2129	55.7587	64.4411	0.769122	1.41622
P49750	YLPM1	YLP motif-containing protein 1	0.848944	0.0386477	72.6318	81.0774	82.6726	96.9981	105.663	101.065	102.754	87.0831	94.3088	-0.236259	1.41288
Q9NUQ8	ABCF3	ATP-binding cassette sub-family F member 3	1.26506	0.0386855	114.256	97.7609	92.7284	122.227	96.2698	89.4666	94.4059	70.3618	71.3869	0.339201	1.41245
Q13501	SQSTM1	Sequestosome-1	1.24282	0.0389498	124.483	119.111	117.871	119.535	77.6856	76.8591	110.537	104.648	114.049	0.313618	1.40949
Q9P035	HACD3	Very-long-chain (3R)-3-hydroxyacyl-CoA dehydratase 3	1.10968	0.0390333	119.128	111.881	104.123	98.4009	98.5081	96.4665	99.1206	100.856	93.4041	0.150138	1.40856
Q9NYV4	CDK12	Cyclin-dependent kinase 12	0.803717	0.0390934	88.0595	89.2658	88.5621	88.0518	128.269	127.465	95.1968	94.091	105.45	-0.315241	1.4079
O14497	ARID1A	AT-rich interactive domain-containing protein 1A	1.29284	0.0391104	114.376	110.13	92.7839	129.264	89.7122	81.4909	110.491	74.1729	75.8895	0.370544	1.40771
H0Y626	H0Y626	B box-type domain-containing protein	1.31364	0.0391296	132.9	112.7	105.3		98.4	103.9	95.4	78.5	69	0.393572	1.40749
A0A7P0TAU8	OAS3	2'-5' oligoadenylate synthase	1.14695	0.0396366	120.223	103.275	103.572	106.992	89.5971	83.1549	96.2376	99.6074	104.464	0.1978	1.4019
A0A0U1RRM4	PTBP1	Polypyrimidine tract-binding protein 1	1.4368	0.0399042	152.39	123.652	155.481	92.1246	81.1753	72.5883	82.0912	105.562	114.149	0.522863	1.39898
Q6IN84	MRM1	rRNA methyltransferase 1, mitochondrial	0.841258	0.0400821	91.3116	106.712	108.897	87.2334	109.989	119.491	101.797	126.263	128.12	-0.249379	1.39705
P35754	GLRX	Glutaredoxin-1	1.13791	0.0400893	107.172	116.935	122.728	108.55	92.1531	96.337	95.157	102.345	114.253	0.186381	1.39697
Q96P47	AGAP3	Arf-GAP with GTPase, ANK repeat and PH domain-containing protein 3	1.59476	0.0401313	134.012	91.0045	89.4562	165.197	66.232	53.2436	86.1016	88.8541	81.5427	0.673338	1.39652
Q712K3	UBE2R2	Ubiquitin-conjugating enzyme E2 R2	1.33037	0.0404674	141.774	111.447	110.082	106.788	74.7174	65.0629	109.453	98.6438	93.8166	0.411823	1.39289
Q96QF0	RAB3IP	Rab-3A-interacting protein	0.878178	0.040478	76.772	88.752	91.3477	102.372	105.524	96.6388	104.027	104.426	100.732	-0.187414	1.39278
Q6NUM9	RETSAT	All-trans-retinol 13,14-reductase	1.30554	0.0408926	123.477	105.421	98.7233	112.394	75.9111	68.6306	115.323	82.7062	78.7262	0.384646	1.38836
P30740	SERPINB1	Leukocyte elastase inhibitor	0.769451	0.0410265	80.374	76.6854	79.7916	88.5014	94.5463	94.5463	88.0426	121.143	130.268	-0.378099	1.38694
P07203	GPX1	Glutathione peroxidase 1	1.4888	0.0412706	171.052	139.008	131.632	93.1687	78.4948	69.1584	124.255	88.9839	88.177	0.574154	1.38436
Q9H081	MIS12	Protein MIS12 homolog	0.828035	0.0416348	87.5	102.1	83.9		126.7	113.4	103.8	102.9	103.7	-0.272236	1.38054
Q9Y224	RTRAF	RNA transcription, translation and transport factor protein	1.21066	0.0418231	120.194	122.693	110.82	105.782	86.552	87.8018	120.298	90.7181	89.0517	0.275789	1.37858
O75093	SLIT1	Slit homolog 1 protein	1.52324	0.0418922	120.032	113.985	104.599	136.267	60.5573	51.8934	127.883	65.7016	83.6612	0.607146	1.37787
O43447	PPIH	Peptidyl-prolyl cis-trans isomerase H	1.1191	0.0421013	104.514	107.467	108.254	100.827	81.9779	90.1461	98.5112	95.6572	104.022	0.162334	1.3757
O75935	DCTN3	Dynactin subunit 3	1.15965	0.0421297	102.618	99.8571	99.0004	124.278	85.959	87.958	90.433	97.4773	97.0965	0.21369	1.37541
Q9NZ53	PODXL2	Podocalyxin-like protein 2	1.58545	0.0423417	104.044	89.736	99.1645	153.201	91.6383	85.0218	81.1346	46.8943	47.0597	0.664897	1.37323
P11387	TOP1	DNA topoisomerase 1	0.944089	0.0424603	95.3087	98.8312	100.844	94.2006	103.561	97.6235	101.347	105.675	107.084	-0.0830048	1.37202
Q9Y606	PUS1	Pseudouridylate synthase 1 homolog	0.928991	0.0426289	97.9013	87.3276	89.3101	89.6094	98.8454	91.2927	99.695	99.8838	100.261	-0.106264	1.3703
A0A8J9C4H3	GOLGB1	Golgin subfamily B member 1	1.18731	0.0426785	105.48	105.962	99.3094	111.347	87.6429	83.8827	110.687	78.9654	83.2077	0.247698	1.36979
Q96TA2	YME1L1	ATP-dependent zinc metalloprotease YME1L1	1.10403	0.043148	93.6261	110.393	105.935	107.533	97.2122	94.0138	87.0354	98.8598	95.5645	0.142779	1.36504
P34932	HSPA4	Heat shock 70 kDa protein 4	1.03356	0.0432123	97.657	97.5583	100.518	101.398	96.7692	94.4018	93.7112	98.3475	97.0651	0.0476216	1.36439
P27487	DPP4	Dipeptidyl peptidase 4	1.40599	0.0436597	150.85	152.705	155.054	81.9863	106.213	92.4882	97.0632	91.0045	93.8484	0.491586	1.35992
Q07889	SOS1	Son of sevenless homolog 1	1.36612	0.0436625	110.642	85.5711	85.8999	134.639	68.8843	64.3633	85.0779	85.4067	77.5976	0.45008	1.35989
Q6E0U4	DMKN	Dermokine	1.28349	0.0437109	86.2214	97.8048	78.9351	115.816	83.8861	62.5876	69.9673	83.2322	69.22	0.360076	1.35941
Q15942	ZYX	Zyxin	1.18192	0.0437433	95.385	100.586	94.642	123.628	89.6266	86.1901	95.1992	82.9394	84.1468	0.241132	1.35909
Q9Y365	STARD10	START domain-containing protein 10	1.17013	0.0439561	102.607	89.9842	96.0252	96.855	81.689	65.8201	82.0497	90.6153	91.6071	0.226674	1.35698
Q14204	DYNC1H1	Cytoplasmic dynein 1 heavy chain 1	1.07844	0.0446897	109.72	110.026	109.006	105.756	103.398	99.6251	90.7537	106.967	102.888	0.108945	1.34979
Q01831	XPC	DNA repair protein complementing XP-C cells	0.867472	0.0446919	90.8863	88.4084	83.0564	81.1457	110.213	102.086	104.564	85.6333	92.4721	-0.205112	1.34977
Q96BS2	TESC	Calcineurin B homologous protein 3	1.13705	0.0450158	98.2479	116.138	106.649	112.868	96.1722	82.8287	99.1375	94.0966	104.771	0.185293	1.34663
O75964	ATP5MG	ATP synthase subunit g, mitochondrial	1.22931	0.0451153	119.909	102.22	92.6314	113.723	73.6397	74.7568	98.3104	98.8689	90.1178	0.297853	1.34568
A0MZ66	SHTN1	Shootin-1	1.32575	0.0451239	115.922	108.067	96.1869	109.428	96.6659	82.5827	104.426	61.985	59.3983	0.406807	1.34559
Q9H1X3	DNAJC25	DnaJ homolog subfamily C member 25	1.24781	0.0451773	105.642	87.9904	88.347	120.181	83.4437	65.2573	79.9669	87.7229	86.4748	0.319401	1.34508
Q9UHW5	GPN3	GPN-loop GTPase 3	0.78692	0.0454438	94.5348	90.5591	100.167	79.952	120.929	109.334	87.4668	126.341	136.059	-0.34571	1.34253
O95456	PSMG1	Proteasome assembly chaperone 1	0.886548	0.045698	96.7917	82.9084	82.1263	91.1927	106.666	102.56	88.9701	102.756	96.7917	-0.173729	1.3401
Q9Y266	NUDC	Nuclear migration protein nudC	0.903014	0.0459742	93.631	97.9059	99.9913	89.6064	105.309	94.8822	103.849	108.645	114.901	-0.14718	1.33749
Q9UK41	VPS28	Vacuolar protein sorting-associated protein 28 homolog	1.11961	0.0461028	109.723	109.102	111.895	105.74	89.9708	88.6264	94.0039	107.448	107.241	0.162997	1.33627
J3QLK0	RAC3	Ras-related C3 botulinum toxin substrate 3 (Fragment)	1.57749	0.0461763	109.404	90.8749	84.1077	155.435	56.3135	52.527	93.6141	81.3685	64.692	0.657628	1.33558
Q14247	CTTN	Src substrate cortactin	1.20964	0.0468523	99.0845	90.7269	93.1413	117.394	78.2833	74.2902	99.0845	82.7407	79.3048	0.274583	1.32927
A0A8Q3WKK6	LIMS1	LIM and senescent cell antigen-like-containing domain protein 1	0.892613	0.0473079	83.5043	84.3545	84.7323	97.0923	103.152	105.797	89.361	95.5955	95.7844	-0.163893	1.32507
Q08211	DHX9	ATP-dependent RNA helicase A	0.922002	0.0478189	94.6202	96.5307	97.8379	94.385	104.374	99.6478	95.4246	111.111	109.2	-0.117159	1.3204
P04406	GAPDH	Glyceraldehyde-3-phosphate dehydrogenase	1.08749	0.0478244	102.657	107.324	106.132	102.544	100.275	104.147	97.2961	92.0342	87.4673	0.121004	1.32035
O00499	BIN1	Myc box-dependent-interacting protein 1	1.17695	0.0478394	116.739	122.206	118.133	110.346	82.0067	88.3314	103.554	106.77	115.774	0.235053	1.32021
Q96EY7	PTCD3	Pentatricopeptide repeat domain-containing protein 3, mitochondrial	0.846907	0.0480601	84.0462	93.0619	95.9669	99.3311	113.197	115.701	88.0532	112.095	120.61	-0.239724	1.31822
A0A7I2YQG7	NDUFS2	NADH dehydrogenase [ubiquinone] iron-sulfur protein 2, mitochondrial	0.850484	0.0482582	87.6801	100.654	101.073	90.6	112.896	113.419	90.6098	122.208	119.383	-0.233644	1.31643
Q99618	CDCA3	Cell division cycle-associated protein 3	1.53242	0.0483613	95.0286	91.9877	82.3581	152.198	59.8046	60.9872	90.2983	62.1698	70.6168	0.615816	1.3155
P22102	GART	Trifunctional purine biosynthetic protein adenosine-3	0.940259	0.0484155	96.8017	94.2543	91.4129	99.662	103.66	104.248	105.032	99.4471	95.6259	-0.08887	1.31502
O43865	AHCYL1	S-adenosylhomocysteine hydrolase-like protein 1	0.862187	0.0485128	80.9979	88.8204	94.3655	96.5693	113.773	105.456	87.5332	111.496	104.763	-0.213928	1.31414
Q86WA8	LONP2	Lon protease homolog 2, peroxisomal	1.42815	0.0486698	96.3794	90.0542	87.8404	144.147	70.9997	54.4753	86.4173	75.1111	79.2224	0.514149	1.31274
Q9BV20	MRI1	Methylthioribose-1-phosphate isomerase	1.34984	0.0486984	135.291	108.194	99.1618	114.836	75.9496	71.2878	121.306	78.4748	76.6295	0.432784	1.31249
Q969T9	WBP2	WW domain-binding protein 2	1.4233	0.0487009	110.976	93.0339	88.05	139.234	73.1811	75.2578	105.078	62.1334	63.1302	0.509238	1.31246
Q9UNF1	MAGED2	Melanoma-associated antigen D2	1.24492	0.048774	103.284	100.967	97.3507	116.876	99.0195	92.7149	82.0527	87.4302	58.9667	0.316057	1.31181
Q96D46	NMD3	60S ribosomal export protein NMD3	0.847423	0.0490351	96.3402	90.6791	90.578	81.52	117.367	119.389	105.337	94.1162	93.5097	-0.238846	1.30949
P31939	ATIC	Bifunctional purine biosynthesis protein ATIC	0.949061	0.0492193	104.352	98.4011	97.7855	93.8162	105.378	106.815	103.839	101.582	101.787	-0.0754277	1.30786
A0A6Q8PGU6	SPATA5	Vesicle-fusing ATPase	1.08242	0.0493713	101.572	105.647	106.541	108.889	92.6272	91.7327	95.7081	102.268	105.746	0.114264	1.30653
P36871	PGM1	Phosphoglucomutase-1	1.2217	0.0494057	139.207	123.361	122.7	104.101	88.9166	85.5052	97.8302	113.457	114.997	0.28889	1.30622
Q15643	TRIP11	Thyroid receptor-interacting protein 11	0.499549	0.049957	42.3432	35.6439	36.1592	98.8034	126.772	120.159	147.471	74.6375	63.8155	-1.0013	1.3014
P29401	TKT	Transketolase	1.13111	0.0500278	113.275	104.308	97.9324	106.658	87.3721	91.4567	105.703	97.8328	84.184	0.177736	1.30079
P60953	CDC42	Cell division control protein 42 homolog	0.901396	0.0504199	95.8646	95.555	98.8571	95.1818	108.66	107.628	92.0465	113.82	112.375	-0.149768	1.2974
O95297	MPZL1	Myelin protein zero-like protein 1	1.28436	0.0507508	117.4	116.9	116.1		86.9	78.2	121.6	89.1	78.9	0.361053	1.29456
Q9ULM3	YEATS2	YEATS domain-containing protein 2	1.19576	0.0508121	100.117	91.2625	90.5611	111.131	89.8598	75.1315	96.8732	72.5892	76.4465	0.257931	1.29403
Q6JQN1	ACAD10	Acyl-CoA dehydrogenase family member 10	1.2943	0.0508433	128.079	94.659	96.8994	128.578	71.5077	72.5345	102.22	92.3252	94.2856	0.372175	1.29377
O43663	PRC1	Protein regulator of cytokinesis 1	1.0977	0.0511385	96.195	91.498	88.304	103.395	90.8404	89.8071	85.8616	85.3919	80.1312	0.134478	1.29125
O76094	SRP72	Signal recognition particle subunit SRP72	1.11646	0.0515409	116.337	100.07	98.098	103.682	91.7882	87.9431	101.844	97.3093	89.3234	0.158925	1.28785
Q15048	LRRC14	Leucine-rich repeat-containing protein 14	1.56228	0.0515719	106.936	98.6592	90.3825	173.664	68.5318	57.1926	90.7135	74.5738	84.7542	0.643655	1.28759
Q9H400	LIME1	Lck-interacting transmembrane adapter 1	1.34217	0.0516369	140	100.1	106.1		100.9	89.1	96.1	71.1	72.7	0.42457	1.28704
Q86VR2	RETREG3	Reticulophagy regulator 3	1.34395	0.0517836	154.804	114.994	124.406	97.0879	71.8307	84.1631	110.018	84.4876	106.448	0.42648	1.28581
A8K2U0	A2ML1	Alpha-2-macroglobulin-like protein 1	1.38595	0.0518295	95.7954	105.121	92.9885	146.614	78.7731	72.254	104.125	73.7932	68.3606	0.47088	1.28542
A0A0A0MS09	IGHD	Immunoglobulin heavy constant delta (Fragment)	3.34513	0.0518835	51.1	272.1	187.4		27.3	28.1	50.1	86.8	62.1	1.74206	1.28497
D6RBQ9	HNRNPD	Heterogeneous nuclear ribonucleoprotein D0 (Fragment)	1.39153	0.0518989	96.7783	128.535	145.114	86.2828	85.0444	67.6049	69.112	96.1324	92.3647	0.476674	1.28484
P10253	GAA	Lysosomal alpha-glucosidase	0.845803	0.0522384	84.0814	84.4671	83.31	88.5862	114.841	113.491	97.5807	90.1561	87.0705	-0.241607	1.28201
Q96CN9	GCC1	GRIP and coiled-coil domain-containing protein 1	1.17573	0.0526671	115.819	101.681	99.2599	102.05	86.0898	83.2814	109.525	84.3467	82.0225	0.233558	1.27846
A0A087WYL5	SEZ6L2	Seizure 6-like protein 2	1.15508	0.0526763	117.621	123.158	122.494	93.7957	104.441	98.9032	96.3558	102.78	92.1472	0.207998	1.27839
Q13394	MAB21L1	Putative nucleotidyltransferase MAB21L1	1.35949	0.052695	93.1474	98.2477	100.127	146.303	72.0304	79.0992	101.29	74.2674	75.878	0.443061	1.27823
Q8N9N8	EIF1AD	Probable RNA-binding protein EIF1AD	0.806387	0.0528049	71.5451	82.3824	81.7111	97.7749	113.264	112.113	79.697	100.796	110.962	-0.310455	1.27733
Q15397	PUM3	Pumilio homolog 3	0.954464	0.0528097	104.74	104.426	101.284	95.1115	108.406	106.416	104.845	105.997	105.474	-0.0672377	1.27729
Q8NB46	ANKRD52	Serine/threonine-protein phosphatase 6 regulatory ankyrin repeat subunit C	1.4026	0.0529664	149.294	117.196	112.144	113.253	68.8516	64.7899	129.679	86.1884	88.8632	0.488102	1.276
A0A8I5IG87	MPHOSPH9	M-phase phosphoprotein 9	1.3418	0.0530408	82.5506	98.9033	101.177	142.694	79.8397	78.0033	88.2347	78.6154	71.5322	0.424172	1.27539
Q9Y3C6	PPIL1	Peptidyl-prolyl cis-trans isomerase-like 1	1.30156	0.0532216	96.757	98.4672	101.707	124.148	67.7749	59.9444	92.7967	81.1859	102.697	0.380242	1.27391
Q9H4I9	SMDT1	Essential MCU regulator, mitochondrial	0.883225	0.0532757	103.009	98.2985	89.6097	92.1617	119.654	116.409	99.9734	107.197	98.9266	-0.179147	1.27347
P09972	ALDOC	Fructose-bisphosphate aldolase C	1.17761	0.0535281	117.832	98.2585	92.3865	113.151	88.2761	79.2723	103.152	89.3526	87.4932	0.235864	1.27142
Q69YH5	CDCA2	Cell division cycle-associated protein 2	1.15286	0.0536884	85.9608	96.6219	97.1981	108.294	91.7235	81.6388	91.5315	73.763	82.119	0.205212	1.27012
Q96RT1	ERBIN	Erbin	1.17728	0.0537238	119.715	136.993	127.12	107.645	90.6554	93.5726	109.953	110.739	116.91	0.235458	1.26983
P07919	UQCRH	Cytochrome b-c1 complex subunit 6, mitochondrial	0.722104	0.0538856	72.2851	70.2225	69.66	85.0663	140.351	111.85	85.4108	85.9733	90.9424	-0.469721	1.26853
Q96CV9	OPTN	Optineurin	1.26994	0.0539748	114.659	114.659	107.998	127.099	76.1029	79.1309	125.661	88.7195	87.5083	0.344762	1.26781
A0A3B3IUD7	PDCD11	Programmed cell death 11, isoform CRA_a	0.896033	0.0540342	105.976	92.3604	90.9379	90.484	116.035	109.735	103.029	102.013	98.9649	-0.158376	1.26733
Q05823	RNASEL	2-5A-dependent ribonuclease	1.2099	0.054331	121.541	98.1301	96.0817	112.517	94.1308	78.231	104.958	89.2535	75.8899	0.274888	1.26495
Q8TEM1	NUP210	Nuclear pore membrane glycoprotein 210	0.925685	0.054638	101.01	100.074	98.5137	97.9133	99.554	100.594	110.997	112.141	113.494	-0.111407	1.26251
P23497	SP100	Nuclear autoantigen Sp-100	1.05033	0.0548399	103.239	98.2131	100.927	100.278	97.9115	99.2183	97.5094	94.6947	89.8695	0.0708421	1.2609
Q07021	C1QBP	Complement component 1 Q subcomponent-binding protein, mitochondrial	0.726078	0.0548515	74.7161	80.2237	87.4979	72.7689	134.156	130.519	73.3652	100.072	104.54	-0.461804	1.26081
O95782	AP2A1	AP-2 complex subunit alpha-1	1.11978	0.0549628	125.749	106.753	105.617	108.595	93.9506	94.983	100.661	109.437	99.6289	0.163221	1.25993
P00966	ASS1	Argininosuccinate synthase	1.14609	0.0551201	118.863	99.2858	101.084	115.139	86.4006	85.7014	96.8886	102.682	102.083	0.196716	1.25869
Q8WXX5	DNAJC9	DnaJ homolog subfamily C member 9	0.774277	0.0554054	81.0171	83.04	89.2098	75.6529	131.994	121.677	83.1412	96.3911	97.8072	-0.369078	1.25645
Q15654	TRIP6	Thyroid receptor-interacting protein 6	1.156	0.0554606	110.096	95.6912	88.9563	114.082	91.8561	83.7181	81.099	95.5977	89.7982	0.209142	1.25602
D6RBT3	NDUFS6	NADH dehydrogenase [ubiquinone] iron-sulfur protein 6, mitochondrial	0.65594	0.0555937	66.1924	69.8697	70.7183	77.281	140.777	145.303	84.202	85.1449	85.8992	-0.608365	1.25497
Q8NF64	ZMIZ2	Zinc finger MIZ domain-containing protein 2	1.19325	0.0557732	100.1	114.2	117.9		82.2	79.8	101.1	99.4	101.5	0.254893	1.25357
Q9NXG6	P4HTM	Transmembrane prolyl 4-hydroxylase	1.12419	0.0558037	97.1657	113.411	113.512	114.67	96.8611	101.836	84.7789	102.648	101.735	0.168892	1.25334
D5H3J5	HLA-B	HLA class I histocompatibility antigen B alpha chain	1.32055	0.0558571	87.4831	106.668	99.3351	137	65.996	69.0656	94.3897	86.4599	91.5759	0.40114	1.25292
Q8NFH5	NUP35	Nucleoporin NUP35	1.32826	0.0559215	134.449	132.389	141.171	102.625	71.7782	76.0068	126.317	109.077	97.3668	0.409542	1.25242
Q8IZ83	ALDH16A1	Aldehyde dehydrogenase family 16 member A1	0.736871	0.0565608	82.9269	99.07	105.594	78.3311	108.247	115.103	94.6473	150.706	152.033	-0.440516	1.24748
Q12802	AKAP13	A-kinase anchor protein 13	1.11006	0.0567068	120.812	106.81	105.685	103.377	100.984	92.0913	91.478	106.401	100.779	0.150642	1.24637
P83876	TXNL4A	Thioredoxin-like protein 4A	1.323	0.0568482	99.6299	94.3322	92.0252	134.719	67.075	66.3914	100.655	81.6862	81.6862	0.403809	1.24528
Q9NUJ1	ABHD10	Palmitoyl-protein thioesterase ABHD10, mitochondrial	1.0493	0.0569779	99.8282	104.668	106.584	106.816	96.3997	99.5257	96.6014	103.862	101.442	0.069421	1.24429
Q9Y3Q8	TSC22D4	TSC22 domain family protein 4	1.29084	0.0572015	93.3971	107.744	106.396	130.261	73.2734	72.5994	71.7328	102.929	103.411	0.368311	1.24259
Q9Y3B8	REXO2	Oligoribonuclease, mitochondrial	0.828701	0.0574185	78.1921	83.6675	81.0739	89.3666	114.214	115.847	97.9803	88.2783	84.9162	-0.271076	1.24095
P50454	SERPINH1	Serpin H1	1.10546	0.05833	105.568	104.98	104.294	108.447	103.999	105.862	92.8252	87.4341	88.5123	0.144649	1.23411
Q8IZ07	ANKRD13A	Ankyrin repeat domain-containing protein 13A	0.848967	0.0588554	92.8	92.2	83.8		117.5	108	112.5	89.8	99.9	-0.236219	1.23021
P61160	ACTR2	Actin-related protein 2	0.857073	0.0589024	84.7954	80.2594	79.9817	91.367	113.4	104.513	98.496	87.6651	86.5543	-0.22251	1.22987
Q8WUW1	BRK1	Protein BRICK1	0.887215	0.0590861	94.4747	90.0971	95.6964	80.8779	111.883	105.062	102.212	100.278	89.3845	-0.172644	1.22851
A0A2R8YCL1	GRB10	Growth factor receptor-bound protein 10	1.97613	0.0593176	226.6	119.1	106.4		50.3	52.6	109.9	97.5	71	0.982681	1.22682
Q969Y2	GTPBP3	tRNA modification GTPase GTPBP3, mitochondrial	1.09977	0.0593314	106.707	106.294	106.294	98.5462	94.9423	84.1065	99.483	104.127	92.2591	0.137205	1.22672
A0A1B0GUZ7	EFR3A	Protein EFR3 homolog A	1.19932	0.0596652	114.112	123.099	122.054	104.244	97.8103	77.3287	119.65	93.9439	94.3619	0.262216	1.22428
Q9H4A4	RNPEP	Aminopeptidase B	0.906432	0.0597195	101.769	95.4209	94.2947	92.9435	98.5947	96.0352	110.881	112.826	111.802	-0.14173	1.22388
B8ZWD1	DBI	Acyl-CoA-binding protein	1.08205	0.059748	98.359	92.494	94.8977	101.681	98.2628	89.7057	83.7446	86.629	89.225	0.113766	1.22368
Q9BY43	CHMP4A	Charged multivesicular body protein 4a	0.797941	0.0597657	95.1496	84.6133	95.5797	74.267	130.307	125.899	91.9242	97.945	101.6	-0.325646	1.22355
E9PJ55	TCP11L1	T-complex protein 11-like protein 1	1.08348	0.0601613	100.8	99.3	101.8		87	87.2	94.2	96.9	99.1	0.115668	1.22068
C9J7Z4	TSEN2	tRNA-intron lyase	0.715734	0.0602099	86.4993	74.5683	80.335	71.5371	146.055	123.883	108.671	86.9964	80.9315	-0.482504	1.22033
P08243	ASNS	Asparagine synthetase [glutamine-hydrolyzing]	1.10674	0.0603429	98.2798	107.719	105.675	109.018	100.518	104.702	84.7541	94.7767	90.3979	0.146312	1.21937
P15408	FOSL2	Fos-related antigen 2	0.833333	0.060458	71.3	96.5	92.4		109.7	93	112.1	97.9	107.7	-0.263034	1.21855
J3KQE5	RAN	GTP-binding nuclear protein Ran (Fragment)	0.922055	0.061644	95.9009	95.0148	93.9317	91.226	105.747	109.882	91.6671	100.135	102.399	-0.117075	1.21011
A0A3B3ITH3	IMPACT	Protein IMPACT	0.854036	0.0618879	84.6173	87.1874	91.3392	102.442	114.965	120.204	88.7691	107.848	103.3	-0.227631	1.20839
Q92597	NDRG1	Protein NDRG1	1.19988	0.061974	93.966	97.1162	92.2559	127.135	88.8357	91.1758	77.405	85.5955	84.6054	0.262895	1.20779
P42336	PIK3CA	Phosphatidylinositol 4,5-bisphosphate 3-kinase catalytic subunit alpha isoform	1.63058	0.0624322	162.8	112.9	99.3		54.7	43.5	106.5	87	91.6	0.705382	1.20459
P05091	ALDH2	Aldehyde dehydrogenase, mitochondrial	1.2905	0.0626319	107.627	101.339	103.651	115.992	103.004	107.349	75.6347	64.8165	64.3542	0.367928	1.2032
P11171	EPB41	Protein 4.1	1.48902	0.063546	132.506	88.6323	85.271	134.562	58.9113	49.3581	108.004	80.0522	73.8603	0.574364	1.19691
P50552	VASP	Vasodilator-stimulated phosphoprotein	0.830866	0.0635654	91.0233	89.9983	93.9959	84.9317	120.852	129.77	92.5608	98.4036	99.9411	-0.267312	1.19678
P53992	SEC24C	Protein transport protein Sec24C	1.24587	0.0636607	150.175	123.077	116.599	104.596	91.7679	83.5628	121.242	101.808	97.7058	0.317154	1.19613
Q9UPA5	BSN	Protein bassoon	1.31403	0.0638264	108.7	109.1	115.7		68.6	63.3	82	104.6	104.5	0.393995	1.195
P62191	PSMC1	26S proteasome regulatory subunit 4	1.06984	0.0640337	101.355	101.754	104.844	103.351	102.651	102.053	94.1798	90.4923	91.19	0.0973996	1.19359
P15924	DSP	Desmoplakin	0.922214	0.0642771	95.6518	92.8038	91.8218	94.7389	108.615	105.472	105.865	94.5715	93.7859	-0.116826	1.19194
Q13488	TCIRG1	V-type proton ATPase 116 kDa subunit a 3	1.52877	0.0644432	153.9	115.9	102.7		83.1	73.8	124.5	63.1	61.6	0.612371	1.19082
E9PH57	TCF4	Transcription factor 4	1.25255	0.0645289	144.183	106.898	105.605	117.13	75.1086	82.4363	102.156	103.988	109.161	0.32487	1.19025
Q04864	REL	Proto-oncogene c-Rel	1.36411	0.0648692	105.966	122.576	113.794	118.137	65.5841	56.0376	126.013	84.677	89.6411	0.447961	1.18796
H7BZ14	PPIL3	Peptidyl-prolyl cis-trans isomerase (Fragment)	0.845519	0.0648845	88.0298	79.783	83.5228	79.987	103.756	94.4546	118.044	86.3996	87.1668	-0.242092	1.18786
Q8N3D4	EHBP1L1	EH domain-binding protein 1-like protein 1	0.907149	0.0649543	82.7648	88.0665	92.19	102.707	100.928	95.8226	102.302	98.0807	106.819	-0.140588	1.18739
Q7Z6M1	RABEPK	Rab9 effector protein with kelch motifs	1.13584	0.0649904	98.4325	101.375	100.426	118.344	85.0487	83.7199	92.8322	96.0595	102.989	0.183755	1.18715
Q13263	TRIM28	Transcription intermediary factor 1-beta	1.18268	0.0652695	112.544	96.9913	94.2579	108.849	96.5201	94.1636	97.4626	74.6522	73.3326	0.242056	1.18529
Q9H814	PHAX	Phosphorylated adapter RNA export protein	0.891057	0.0652703	95.6488	89.1319	88.2295	87.4871	114.197	103.67	103.168	89.3324	95.348	-0.16641	1.18528
P07948	LYN	Tyrosine-protein kinase Lyn	1.13407	0.0656387	112.083	99.672	94.1881	116.084	90.3398	83.7976	102.654	95.6312	92.745	0.181511	1.18284
Q02252	ALDH6A1	Methylmalonate-semialdehyde dehydrogenase [acylating], mitochondrial	1.19469	0.0657938	105.468	101.374	103.754	120.171	78.4343	72.7231	105.468	93.6643	100.423	0.256632	1.18182
A0A7I2V5A3	HGS	Hepatocyte growth factor-regulated tyrosine kinase substrate	1.17147	0.0662991	101.325	96.7281	93.7858	113.765	91.6711	83.3039	103.256	75.6723	78.8904	0.228321	1.17849
Q96DI7	SNRNP40	U5 small nuclear ribonucleoprotein 40 kDa protein	0.876753	0.0668687	97.1625	86.6505	84.5874	97.9837	103.843	92.7416	96.8678	112.39	116.516	-0.189757	1.17478
Q9NVI7	ATAD3A	ATPase family AAA domain-containing protein 3A	1.11893	0.0669138	106.961	110.003	111.016	109.909	88.3062	88.3062	96.0115	104.021	112.537	0.162122	1.17448
P99999	CYCS	Cytochrome c	1.13378	0.0681323	96.3888	112.67	103.68	118.143	86.3004	89.1971	92.4933	102.482	104.579	0.181136	1.16665
Q9NPH2	ISYNA1	Inositol-3-phosphate synthase 1	0.923741	0.0681895	94.9933	96.1316	96.649	90.37	93.9585	98.7185	100.788	110.101	108.135	-0.114439	1.16628
Q4LDE5	SVEP1	Sushi, von Willebrand factor type A, EGF and pentraxin domain-containing protein 1	0.816441	0.0682731	81.2	86.7	93.1		115.3	117.3	82.1	108.5	109.6	-0.292579	1.16575
M0QZR4	ARHGEF1	Rho guanine nucleotide exchange factor 1	0.839427	0.0685363	92.5205	101.342	102.956	85.2892	104.462	98.9754	105.968	125.333	134.262	-0.252523	1.16408
Q9UQE7	SMC3	Structural maintenance of chromosomes protein 3	1.14867	0.0685599	113.919	117.136	107.182	104.246	94.1111	85.7658	116.131	87.7767	97.7308	0.199968	1.16393
Q6GMV3	PTRHD1	Putative peptidyl-tRNA hydrolase PTRHD1	1.3067	0.0686618	123.301	113.042	104.658	106.415	96.1744	79.7015	119.355	72.7967	59.9734	0.385927	1.16328
A0A1W2PQ47	FDFT1	Squalene synthase	0.686086	0.068782	70.1383	70.8747	71.2429	84.4015	144.787	136.963	80.7235	95.4507	82.5644	-0.543538	1.16253
Q8TBX8	PIP4K2C	Phosphatidylinositol 5-phosphate 4-kinase type-2 gamma	1.06834	0.068869	102.801	96.2083	96.1128	104.906	88.6607	89.9983	99.5522	95.3485	94.4886	0.0953716	1.16198
P25098	GRK2	Beta-adrenergic receptor kinase 1	0.925453	0.0689583	100.333	99.4229	97.5012	98.4191	112.673	113.684	108.93	102.659	96.4898	-0.111768	1.16141
Q8N5M1	ATPAF2	ATP synthase mitochondrial F1 complex assembly factor 2	0.792936	0.069479	79.4727	89.6025	98.3748	83.655	117.277	114.562	76.2353	117.904	127.511	-0.334724	1.15815
Q9BR76	CORO1B	Coronin-1B	1.13466	0.069496	103.76	115.676	111.156	99.5833	103.04	105.814	95.6437	83.7267	85.6786	0.18226	1.15804
Q9Y315	DERA	Deoxyribose-phosphate aldolase	0.651851	0.0699101	98.2803	105.751	112.063	57.7783	114.896	119.018	107.683	180.975	194.371	-0.617386	1.15546
Q5VTE6	ANGEL2	Protein angel homolog 2	1.23754	0.0699109	87.3209	104.188	94.7001	127.692	84.5976	80.2052	100.059	72.2989	80.908	0.307472	1.15546
Q9BY32	ITPA	Inosine triphosphate pyrophosphatase	1.10053	0.0701835	95.2903	110.939	108.747	114.508	92.5991	97.1842	92.1007	101.57	104.361	0.138199	1.15376
P04424	ASL	Argininosuccinate lyase	1.14181	0.070248	100.512	101.655	98.035	125.53	89.3653	86.6976	98.3208	94.0336	97.6539	0.191325	1.15337
P35268	RPL22	60S ribosomal protein L22	1.14716	0.0702967	110.569	124.071	108.932	108.969	91.9533	95.2264	107.91	113.433	84.5889	0.198063	1.15307
Q6ZMU5	TRIM72	Tripartite motif-containing protein 72	0.860229	0.0704113	80.7116	76.6122	77.2499	94.9936	105.217	106.31	95.3781	85.9952	85.9952	-0.217208	1.15236
A0A286YEX4	NFIC	Nuclear factor 1	1.22721	0.0705421	120.16	89.7179	87.4489	119.323	93.594	74.7807	91.9868	87.2599	76.766	0.295379	1.15155
A0A2R8Y635	ATP13A3	Polyamine-transporting ATPase 13A3	1.21858	0.0713888	118	111	103.6		88.3	79.6	116	86.9	84.1	0.285204	1.14637
Q9UQ80	PA2G4	Proliferation-associated protein 2G4	0.963047	0.0714092	90.5983	93.2428	94.2223	96.7455	101.47	95.1038	96.9647	97.3565	95.5935	-0.0543224	1.14625
F8WCF6	ARPC4-TTLL3	Actin-related protein 2/3 complex subunit 4	0.864082	0.0714285	95.3378	77.7139	74.7141	96.6575	90.9318	92.8067	106.493	107.806	100.212	-0.210759	1.14613
P20020	ATP2B1	Plasma membrane calcium-transporting ATPase 1	1.12679	0.0714612	95.2936	95.7571	96.406	119.737	92.2346	90.0098	92.6981	86.58	90.1952	0.172221	1.14593
Q86YQ8	CPNE8	Copine-8	1.20236	0.0715455	105.742	115.696	105.841	112.178	97.2673	80.6126	118.061	82.485	78.4445	0.265866	1.14542
Q01658	DR1	Protein Dr1	0.776174	0.0715647	78.7353	80.5152	92.9746	67.1842	131.819	103.235	78.2118	96.011	105.12	-0.365548	1.1453
Q16594	TAF9	Transcription initiation factor TFIID subunit 9	1.26061	0.0717472	99.0823	95.3285	88.9559	132.965	79.004	78.0437	100.479	81.8848	73.417	0.334118	1.14419
Q8WW59	SPRYD4	SPRY domain-containing protein 4	1.20308	0.0718983	96.4807	88.3882	90.0067	126.591	86.1403	84.2521	86.5	81.105	79.1268	0.266731	1.14328
O95486	SEC24A	Protein transport protein Sec24A	1.16428	0.072457	116.958	128.447	127.58	106.178	95.4955	88.8835	98.097	110.996	120.968	0.219441	1.13992
P68032	ACTC1	Actin, alpha cardiac muscle 1	1.21477	0.0725812	101.775	134.014	130.642	114.585	86.1818	86.3925	95.7692	122.319	104.303	0.280684	1.13918
A0A6Q8PFJ4	MFN2	Mitofusin-2	1.1006	0.0728477	114.646	96.7537	97.3371	97.7755	95.3923	85.1821	95.5868	94.1282	91.4055	0.138287	1.13758
Q9P0U3	SENP1	Sentrin-specific protease 1	1.29492	0.0731285	138.2	111.7	96		86.4	84.1	107.7	71.3	95.7	0.372867	1.13591
P49790	NUP153	Nuclear pore complex protein Nup153	1.12936	0.0731757	93.9089	98.6777	97.8523	113.406	96.385	97.3938	90.7908	80.7029	81.7117	0.175506	1.13563
P07339	CTSD	Cathepsin D	1.14681	0.0731811	94.7496	96.5163	94.4707	117.681	93.8198	91.9601	93.6338	80.1513	80.1513	0.197629	1.1356
A0A0G2JL56	HLA-A	HLA class I histocompatibility antigen, A alpha chain	1.24789	0.0734199	105.33	124.226	112.307	114.153	74.4191	71.2214	120.35	90.2138	100.582	0.319492	1.13419
P61604	HSPE1	10 kDa heat shock protein, mitochondrial	1.23436	0.0736033	100.058	106.036	96.8395	118.81	86.5394	90.6778	110.174	70.7213	68.974	0.303765	1.1331
Q9UH99	SUN2	SUN domain-containing protein 2	1.18522	0.0739067	100.406	94.7336	95.49	121.021	90.5737	81.5919	103.81	77.2429	80.9301	0.245161	1.13132
Q9BXR0	QTRT1	Queuine tRNA-ribosyltransferase catalytic subunit 1	1.20733	0.0739988	98.1031	114.096	110.098	117	78.697	72.6509	92.8371	96.7378	113.901	0.271817	1.13078
Q9UBI6	GNG12	Guanine nucleotide-binding protein G(I)/G(S)/G(O) subunit gamma-12	1.5034	0.0748284	126.913	83.1355	72.5799	144.292	64.561	62.6789	98.928	67.834	60.9606	0.588227	1.12593
A0A0C4DFW2	ING1	Inhibitor of growth protein	1.12861	0.0750647	107.925	105.604	116.259	97.2332	93.5769	87.458	88.091	110.351	93.4714	0.174551	1.12456
Q6R327	RICTOR	Rapamycin-insensitive companion of mTOR	0.726767	0.075194	86.2751	103.933	106.777	83.36	110.57	126.687	90.66	162.121	164.136	-0.460436	1.12382
G5E9Q6	PFN2	Profilin	1.08088	0.0758823	102.837	97.0643	97.5536	112.729	98.532	98.0428	89.628	93.6397	94.5203	0.11221	1.11986
A0A5H1ZRQ2	DDX17	RNA helicase	1.09537	0.0760442	108.616	115.733	110.576	102.379	95.0005	93.3501	112.639	97.6823	100.364	0.131421	1.11893
A0A8I5KSY8	CYB5B	Cytochrome b5 type B	0.808377	0.0763501	85.8708	83.4285	88.2154	85.7271	128.855	111.466	75.6132	107.656	107.168	-0.3069	1.11719
Q9ULD0	OGDHL	2-oxoglutarate dehydrogenase-like, mitochondrial	1.32372	0.0763679	125.991	125.776	134.262	105.915	66.1641	65.09	116.646	96.1313	120.513	0.404602	1.11709
P58107	EPPK1	Epiplakin	0.882745	0.0763802	87.3515	83.1826	80.9528	93.6467	93.5562	92.102	115.079	95.0105	92.9745	-0.179932	1.11702
Q9Y6X9	MORC2	ATPase MORC2	1.07758	0.07646	104	110.106	99.2725	102.545	103.409	101.045	92.871	96.318	88.8332	0.107789	1.11657
P51858	HDGF	Hepatoma-derived growth factor	0.810283	0.0764778	61.8114	76.0271	72.7881	99.8259	86.464	82.8651	102.749	102.119	104.729	-0.303502	1.11646
A0A1B0GTU4	PXN	Paxillin	1.16907	0.0765235	98.2004	114.846	106.966	118.75	81.4561	80.8651	93.6695	109.232	103.913	0.225364	1.11621
P40855	PEX19	Peroxisomal biogenesis factor 19	1.15283	0.0765758	95.199	103.853	109.459	120.324	86.7413	81.2339	91.9536	98.2477	106.804	0.205182	1.11591
A0A8Q3WKF1	MRPS27	28S ribosomal protein S27, mitochondrial	0.809639	0.0766822	87.7383	88.4475	91.6895	77.6925	128.365	125.427	90.1698	96.1474	93.4119	-0.30465	1.11531
K7ELG9	LSM12	Protein LSM12	1.27213	0.0768073	85.4851	97.6142	91.1342	134.888	68.2884	79.7528	86.6481	87.7281	79.5867	0.347246	1.1146
P49916	LIG3	DNA ligase 3	1.07323	0.0773989	106.976	114.215	108.183	105.351	100.642	97.9276	93.0011	106.876	107.881	0.10196	1.11127
Q13112	CHAF1B	Chromatin assembly factor 1 subunit B	1.09767	0.0775029	104.771	91.1259	90.1913	107.861	87.3874	89.0698	94.3037	88.2286	89.6305	0.134446	1.11068
A0A7P0T823	HSP90B1	Endoplasmin	0.882594	0.0775663	86.8153	96.439	99.9845	89.0563	115.078	117.003	91.6778	101.2	102.314	-0.180178	1.11033
O75531	BANF1	Barrier-to-autointegration factor	1.13117	0.0781583	104.572	99.5057	100.844	120.484	88.9912	94.2485	108.3	88.2265	90.3294	0.177813	1.10702
Q9NUI1	DECR2	Peroxisomal 2,4-dienoyl-CoA reductase [(3E)-enoyl-CoA-producing]	1.42343	0.0785867	125.747	99.3063	86.1295	120.883	63.2663	51.1367	120.162	73.0399	71.8182	0.509372	1.10465
O60716	CTNND1	Catenin delta-1	1.11386	0.0786075	101.541	96.0624	99.085	114.308	85.4833	83.3108	96.2513	99.085	97.1014	0.155563	1.10454
Q9NTX5	ECHDC1	Ethylmalonyl-CoA decarboxylase	0.865453	0.0790406	95.4172	104.742	107.67	84.3467	103.658	106.152	106.802	119.055	130.765	-0.208473	1.10215
A0A804HJH7	TUBGCP2	Gamma-tubulin complex component	0.833946	0.0790454	89.6989	96.7585	97.7967	83.5325	124.374	124.582	83.885	109.632	108.801	-0.261974	1.10212
A0A8C8QSB1	HLCS	Biotin--protein ligase	1.20032	0.0797936	113.4	101.7	102		70.1	81.3	95.2	104.8	88.9	0.263417	1.09803
P30085	CMPK1	UMP-CMP kinase	1.2039	0.0802683	89.4489	106.563	103.727	133.289	84.9103	91.4346	79.8043	100.323	93.1365	0.267718	1.09546
Q14134	TRIM29	Tripartite motif-containing protein 29	0.809487	0.0802882	97.6	77.4	79.6		119.7	119.3	99.6	89.4	96.2	-0.304919	1.09535
A0A8Q3WLB2	KIF1B	Kinesin-like protein KIF1B	0.811055	0.0802896	75.3	91.5	93.5		110.3	99.5	85.9	117.2	122	-0.302128	1.09534
Q9BSH4	TACO1	Translational activator of cytochrome c oxidase 1	0.814455	0.0803298	91.3942	87.1433	89.9772	82.7133	123.58	130.361	106.576	88.6615	89.876	-0.296093	1.09512
Q01650	SLC7A5	Large neutral amino acids transporter small subunit 1	0.715645	0.0805678	107.594	73.9006	89.1749	74.8137	105.011	100.406	98.2721	169.702	130.056	-0.482683	1.09384
Q96L91	EP400	E1A-binding protein p400	1.15639	0.0810899	102.545	117.223	115.715	116.709	84.7503	83.4434	98.5235	110.487	111.593	0.209626	1.09103
P30043	BLVRB	Flavin reductase (NADPH)	1.24327	0.0814762	107.34	96.6984	91.609	124.959	87.63	89.2956	106.322	70.141	69.4933	0.314143	1.08897
E5RG17	TATDN1	Deoxyribonuclease TATDN1 (Fragment)	0.888912	0.0815808	107.461	87.2588	89.2684	95.6973	103.441	99.5279	120.682	102.066	108.201	-0.169887	1.08841
O14777	NDC80	Kinetochore protein NDC80 homolog	1.13508	0.0818481	100.569	96.8438	95.3157	118.7	99.4225	88.2482	95.7933	80.4167	89.2033	0.182791	1.08699
O96008	TOMM40	Mitochondrial import receptor subunit TOM40 homolog	0.880424	0.0819302	94.2386	91.1107	94.3395	93.4093	115.831	118.252	87.6802	106.044	101.907	-0.18373	1.08656
P11233	RALA	Ras-related protein Ral-A	1.27667	0.0820466	127.624	97.2238	89.9767	116.589	83.1061	76.612	114.259	75.4825	72.9414	0.352385	1.08594
P60866	RPS20	40S ribosomal protein S20	0.922935	0.0822366	100.874	104.956	108.394	97.836	105.171	107.642	106.46	117.096	121.715	-0.115699	1.08494
Q8WTS6	SETD7	Histone-lysine N-methyltransferase SETD7	1.13105	0.0823604	108.013	114.823	111.051	98.7615	90.8316	89.1554	113.461	87.3744	97.3271	0.177663	1.08428
Q9NX24	NHP2	H/ACA ribonucleoprotein complex subunit 2	1.08239	0.0823904	95.8638	114.571	111.74	105.133	95.0548	100.414	103.347	96.3694	98.2907	0.114226	1.08412
Q07666	KHDRBS1	KH domain-containing, RNA-binding, signal transduction-associated protein 1	1.31484	0.0825479	99.0865	88.9195	81.8359	129.007	74.8357	67.2521	101.587	67.6688	67.8355	0.394891	1.08329
Q6NZI2	CAVIN1	Caveolae-associated protein 1	1.07758	0.0828331	96.3765	110.889	108.947	103.255	97.1941	92.9016	95.0479	96.1721	105.268	0.107799	1.0818
Q8IWV8	UBR2	E3 ubiquitin-protein ligase UBR2	1.39027	0.0829961	177.454	141.302	128.306	102.991	77.2671	70.6509	136.93	106.449	103.259	0.475363	1.08094
X6REB3	TCF3	Transcription factor E2-alpha	1.24301	0.0832741	97.6788	106.937	94.3457	133.21	93.0494	97.1233	100.364	73.9766	70.088	0.313841	1.07949
Q14457	BECN1	Beclin-1	0.78329	0.0833027	81.2897	80.2059	88.6797	76.7587	132.428	122.181	84.2457	95.4785	87.3988	-0.352382	1.07934
Q8N8Z6	DCBLD1	Discoidin, CUB and LCCL domain-containing protein 1	1.33039	0.0838606	97.1101	96.8581	82.4932	146.259	85.0133	78.8809	90.3897	67.7922	75.1007	0.411848	1.07644
C9JIF9	APEH	Acylamino-acid-releasing enzyme	1.06996	0.0845558	110.123	108.999	104.3	100.494	96.1276	99.2944	108.693	95.3103	95.8211	0.0975618	1.07286
P20618	PSMB1	Proteasome subunit beta type-1	0.929953	0.0849035	92.8914	93.6029	96.1437	91.9351	108.441	100.717	89.8425	102.038	102.445	-0.10477	1.07107
O15042	U2SURP	U2 snRNP-associated SURP motif-containing protein	0.942608	0.08493	104.708	92.8098	93.9996	96.3246	105.7	106.692	100.742	102.924	98.2633	-0.0852698	1.07094
Q8WXH0	SYNE2	Nesprin-2	1.09541	0.0851697	93.4009	105.371	101.129	111	93.6836	83.8817	94.0606	98.8673	98.3961	0.131469	1.06972
Q96CW1	AP2M1	AP-2 complex subunit mu	1.15201	0.0854358	114.736	92.7214	90.6692	110.828	96.0795	87.6842	95.4266	88.1506	76.3972	0.204158	1.06836
Q9ULQ0	STRIP2	Striatin-interacting protein 2	0.848733	0.0858994	89.5643	101.556	102.617	83.9664	122.992	126.706	89.8826	107.18	109.515	-0.236617	1.06601
A0A8Q3SIL6	UBE2A	Ubiquitin-conjugating enzyme E2 A	0.851422	0.0860585	99.4883	78.9937	81.8788	93.3057	116.302	118.391	89.6389	96.9016	97.9959	-0.232054	1.06521
P46977	STT3A	Dolichyl-diphosphooligosaccharide--protein glycosyltransferase subunit STT3A	1.11476	0.0861564	108.421	111.624	102.914	105.585	92.7031	84.8944	112.525	98.7097	91.702	0.156732	1.06471
Q13542	EIF4EBP2	Eukaryotic translation initiation factor 4E-binding protein 2	1.07314	0.0863618	110.49	102.393	102.492	92.7903	92.2232	92.7169	94.3955	97.8514	98.2463	0.101841	1.06368
Q9BTD8	RBM42	RNA-binding protein 42	0.879297	0.0864897	83.3705	94.8352	99.6625	95.867	110.926	114.546	88.8012	101.774	115.25	-0.185578	1.06304
Q9UPT9	USP22	Ubiquitin carboxyl-terminal hydrolase 22	1.20304	0.0867725	131.1	113.7	105.5		84	88.7	118.4	98.9	95.3	0.26668	1.06162
Q8WVX9	FAR1	Fatty acyl-CoA reductase 1	1.14762	0.086787	111.3	106.4	99.8		85.8	79	105.3	98.9	92.1	0.198643	1.06155
O75165	DNAJC13	DnaJ homolog subfamily C member 13	0.791586	0.0869403	77.1102	87.2743	81.3127	92.3481	129.788	130.178	88.7403	91.0858	94.0178	-0.337181	1.06078
O00148	DDX39A	ATP-dependent RNA helicase DDX39A	0.950517	0.0874132	98.3634	103.333	103.644	93.6022	105.922	108.821	100.641	103.23	106.025	-0.0732157	1.05842
P10589	NR2F1	COUP transcription factor 1	1.26769	0.0879733	139.3	112.1	107		79.7	79.3	95.6	120.4	96.2	0.342197	1.05565
A0A8Q3WLM4	PTK2	Focal adhesion kinase 1	1.07909	0.0884921	118.284	106.506	103.284	103.227	96.7409	95.6335	106.707	103.486	97.0429	0.109818	1.0531
Q13885	TUBB2A	Tubulin beta-2A chain	1.19151	0.0885202	103.803	104.956	104.571	129.5	94.9689	106.492	69.2342	95.161	98.7139	0.252787	1.05296
A0A3B3ITW3	ABCD3	ATP-binding cassette sub-family D member 3	0.873449	0.0886542	90.0144	87.0171	88.1773	91.6431	122.694	105.774	90.4978	94.6553	97.0724	-0.195205	1.0523
P45984	MAPK9	Mitogen-activated protein kinase 9	1.18045	0.0887431	100.232	92.5009	96.5507	121.759	80.1675	72.1599	89.6477	94.1576	99.1278	0.239339	1.05187
Q9UNK0	STX8	Syntaxin-8	0.868447	0.0888122	82.1	95.7	99.2		118.7	100.7	97.8	99.7	114.7	-0.20349	1.05153
Q86SQ0	PHLDB2	Pleckstrin homology-like domain family B member 2	1.53025	0.0888968	121.971	110.915	94.7285	139.068	66.5134	61.4718	141.872	58.0223	53.3345	0.613767	1.05111
Q8NCA5	FAM98A	Protein FAM98A	1.11239	0.0889021	106.79	93.6654	97.159	113.106	86.8671	83.6568	98.1976	93.2877	99.5195	0.153663	1.05109
Q9NSD9	FARSB	Phenylalanine--tRNA ligase beta subunit	0.968968	0.08899	98.7244	101.248	100.541	97.3881	104.276	102.056	98.7244	102.056	106.194	-0.0454789	1.05066
Q96T51	RUFY1	RUN and FYVE domain-containing protein 1	1.30137	0.0889999	109.657	88.8598	89.58	120.379	104.525	91.0205	76.4356	59.6	60.7703	0.380031	1.05061
Q9NRF9	POLE3	DNA polymerase epsilon subunit 3	0.79025	0.0890518	84.9888	108.453	109.688	77.0245	108.902	136.746	89.0306	134.837	131.806	-0.33962	1.05036
B0YIW6	ARCN1	Coatomer subunit delta	1.10725	0.089247	114.68	115.923	111.469	98.3989	90.4388	90.8531	106.392	105.564	104.01	0.146981	1.04941
Q92994	BRF1	Transcription factor IIIB 90 kDa subunit	0.772267	0.0898459	89.5355	88.2441	102.342	84.753	109.875	107.184	87.3832	129.783	156.364	-0.372829	1.0465
P25490	YY1	Transcriptional repressor protein YY1	0.787017	0.0899018	102.615	101.176	104.386	75.0788	130.731	133.056	80.5862	133.72	130.621	-0.345533	1.04623
P40937	RFC5	Replication factor C subunit 5	1.14363	0.089929	119.171	112.42	104.544	104.853	87.5629	86.3354	117.432	96.0532	94.6211	0.193621	1.0461
A0A6Q8PF02	GPSM2	G-protein-signaling modulator 2	1.31544	0.0899313	74.9304	71.5441	79.6856	114.88	57.4947	51.0823	72.1205	78.3167	65.0597	0.395548	1.04609
O00161	SNAP23	Synaptosomal-associated protein 23	1.29646	0.0899508	96.3505	99.228	87.631	136.865	79.6091	85.7999	103.588	64.6987	71.3256	0.374578	1.04599
Q9H078	CLPB	Caseinolytic peptidase B protein homolog	1.13967	0.0899716	114.148	111.9	105.973	110.078	89.5201	81.1404	114.557	93.9143	105.769	0.188611	1.04589
F5H2F4	MTHFD1	C-1-tetrahydrofolate synthase, cytoplasmic	0.929521	0.0902645	98.0218	91.3563	91.7484	95.9367	102.923	102.335	111.157	94.2969	96.3554	-0.105441	1.04448
O43491	EPB41L2	Band 4.1-like protein 2	1.13466	0.0905714	100.375	114.861	116.71	106.367	91.1286	85.0671	89.2794	108.183	109.211	0.18226	1.04301
Q2KHT3	CLEC16A	Protein CLEC16A	1.56448	0.0917949	176.9	105.2	112.9		57.6	54.8	120.8	101.6	86	0.645684	1.03718
J3QS41	HELZ	Probable helicase with zinc finger domain	1.23755	0.091797	104.22	90.7249	83.0629	123.689	96.9938	81.7569	87.8517	69.3062	69.8286	0.307491	1.03717
O75581	LRP6	Low-density lipoprotein receptor-related protein 6	0.780411	0.0921172	81.9659	87.0145	85.6286	84.942	131.165	123.741	122.85	77.0163	89.0934	-0.357693	1.03566
A0A087X295	WDR6	WD repeat-containing protein 6	1.13509	0.0922783	101.802	94.0002	92.8585	122.583	94.8565	90.7654	92.6682	87.15	87.4354	0.182808	1.0349
O75368	SH3BGRL	Adapter SH3BGRL	1.18008	0.0923533	110.087	112.824	104.816	102.442	89.4074	81.602	119.109	79.676	85.8595	0.23889	1.03455
Q8WUH1	CHURC1	Protein Churchill	1.17816	0.0925741	108.48	84.5839	91.6957	122.522	92.5491	87.0493	84.6787	79.084	88.7562	0.23653	1.03351
Q14344	GNA13	Guanine nucleotide-binding protein subunit alpha-13	0.854372	0.09263	87.2285	90.7481	82.2821	103.511	110.248	125.944	109.012	94.8384	92.1749	-0.227063	1.03325
A0A8I5QKQ8	SPTLC1	Serine palmitoyltransferase 1	1.1958	0.0927386	102.264	94.6667	90.3875	125.976	91.3481	89.3395	99.3826	76.5019	75.4539	0.257982	1.03274
A0A7I2V508	BAG6	Large proline-rich protein BAG6	1.06603	0.0928102	105.695	105.1	102.522	100.679	101.53	103.91	98.4566	89.2356	92.3092	0.092245	1.0324
O96033	MOCS2	Molybdopterin synthase sulfur carrier subunit	1.18395	0.0933365	108.57	92.5878	88.2707	118.861	89.9241	91.5774	98.742	75.9624	74.8602	0.243612	1.02995
Q96C19	EFHD2	EF-hand domain-containing protein D2	0.731401	0.0934137	92.9421	93.4133	108.02	65.5543	117.797	106.607	84.6963	152.194	153.843	-0.451266	1.02959
Q9P0M6	MACROH2A2	Core histone macro-H2A.2	1.35765	0.0935804	113.684	85.1163	80.5924	138.529	67.4396	66.0992	103.547	75.8172	71.8797	0.441115	1.02882
O95816	BAG2	BAG family molecular chaperone regulator 2	1.0799	0.0943473	104.899	100.864	101.258	102.572	98.9947	104.505	94.665	91.4176	84.5293	0.110894	1.02527
P20645	M6PR	Cation-dependent mannose-6-phosphate receptor	0.793277	0.0943904	95.378	81.4002	83.0447	80.8482	138.75	121.278	94.5558	86.8475	95.378	-0.334103	1.02507
F5GX28	KDM4B	[Histone H3]-trimethyl-L-lysine(9) demethylase	1.19487	0.0946139	105.711	118.159	91.9574	117.347	90.05	76.1962	114.746	83.3239	88.8453	0.256853	1.02405
Q5BJF2	TMEM97	Sigma intracellular receptor 2	0.841333	0.0948471	85.5	81.4	85.5		111.3	95.4	78.9	109.7	104.7	-0.249251	1.02298
Q9BYK8	HELZ2	Helicase with zinc finger domain 2	1.24683	0.0948662	121.275	135.29	136.646	97.648	87.8198	73.1266	96.4096	115.624	119.127	0.318264	1.02289
P07900	HSP90AA1	Heat shock protein HSP 90-alpha	1.03252	0.0949861	103.961	107.081	103.659	100.367	99.2306	100.74	103.055	102.25	97.2178	0.0461668	1.02234
H3BND4	PDXDC1	Pyridoxal-dependent decarboxylase domain-containing protein 1	1.10688	0.0949977	101.568	99.6403	95.3039	113.928	101.182	86.7275	100.315	86.6312	88.6548	0.146496	1.02229
Q9C0B0	UNK	RING finger protein unkempt homolog	1.55846	0.0953846	110.985	115.978	100.566	145.447	52.1774	49.2499	145.339	58.1184	74.4776	0.640121	1.02052
O95271	TNKS	Poly [ADP-ribose] polymerase tankyrase-1	1.28861	0.0954437	93.2	125.7	124		78.9	67	84.9	108.9	103.8	0.365819	1.02025
Q2TAA2	IAH1	Isoamyl acetate-hydrolyzing esterase 1 homolog	1.5069	0.0956031	108.107	91.3347	74.5623	145.699	66.2592	55.0499	113.089	59.2845	54.4687	0.591583	1.01953
P31949	S100A11	Protein S100-A11	1.34993	0.0963019	128.648	95.4609	88.7488	118.239	69.7312	64.6039	121.563	75.1381	68.1464	0.432889	1.01636
Q9UIW2	PLXNA1	Plexin-A1	1.30587	0.0963802	89.5388	106.997	101.12	152.984	70.4384	76.4883	100.342	90.9217	93.1688	0.385012	1.01601
Q8IWE2	FAM114A1	Protein NOXP20	1.30033	0.0964988	113.455	134.367	149.502	95.3212	94.9693	88.7305	63.544	108.602	117.73	0.378879	1.01548
P16989	YBX3	Y-box-binding protein 3	0.767776	0.0965465	89.0388	77.2771	84.4992	66.3588	135.157	118.547	96.3642	79.2374	87.0785	-0.381242	1.01526
A0A087WT58	MROH2A	Maestro heat-like repeat-containing protein family member 2A	0.873803	0.097047	77.3	88.5	93.3		108.5	106.6	86.6	95.3	97.2	-0.19462	1.01302
A8MW92	PHF20L1	PHD finger protein 20-like protein 1	0.874631	0.0970518	96.6432	92.5641	96.7478	85.0863	123.628	106.266	87.4391	105.011	107.939	-0.193253	1.013
B1AHC4	PRR5-ARHGAP8	PRR5-ARHGAP8 readthrough	1.10865	0.0975313	106.4	112.9	95.6		102.8	85.7	97.5	94.1	93.3	0.1488	1.01086
Q01850	CDR2	Cerebellar degeneration-related protein 2	1.09044	0.098155	109.545	107.046	115.242	99.1536	105.747	99.6497	88.6553	94.8522	105.147	0.12491	1.00809
Q14697	GANAB	Neutral alpha-glucosidase AB	1.06389	0.0982054	103.311	103.211	101.026	97.857	96.2578	91.7877	104.801	93.9731	89.5029	0.0893548	1.00786
Q06136	KDSR	3-ketodihydrosphingosine reductase	0.724549	0.0983466	78.8352	76.7528	79.3311	87.9418	141.903	148.448	87.5617	81.4135	97.6764	-0.464845	1.00724
Q969J3	BORCS5	BLOC-1-related complex subunit 5	0.763294	0.0984057	85.8	84.3	81.1		135	132.1	100	87.9	93.5	-0.38969	1.00698
Q5T9A4	ATAD3B	ATPase family AAA domain-containing protein 3B	1.26103	0.0985292	147.484	119.738	125.074	117.474	75.6631	79.5049	97.3269	124.22	128.595	0.334606	1.00644
Q15404	RSU1	Ras suppressor protein 1	1.15749	0.0985671	113.864	107.5	103.423	113.537	81.3458	76.8708	108.594	98.7487	107.798	0.210996	1.00627
Q13009	TIAM1	Rho guanine nucleotide exchange factor TIAM1	0.827128	0.098617	95.437	119.934	102.753	91.6609	104.97	101.423	131.461	138.555	142.878	-0.273817	1.00605
O75496	GMNN	Geminin	0.826171	0.0987069	88.6439	85.6267	102.273	92.4503	121.105	108.412	80.5286	117.776	130.469	-0.275488	1.00565
Q13017	ARHGAP5	Rho GTPase-activating protein 5	1.11417	0.0987167	105.469	118.562	111.036	117.055	100.727	88.8703	94.5406	106.191	116.913	0.155973	1.00561
A0A669KAX3	WFS1	Wolframin	1.52112	0.098742	197.717	144.601	132.731	106.099	71.2215	46.4019	150.476	106.113	103.355	0.605132	1.0055
Q13561	DCTN2	Dynactin subunit 2	1.12236	0.0990347	106.774	98.7931	96.9437	108.679	94.0238	95.2891	105.801	79.0345	83.8038	0.166536	1.00421
Q9UL15	BAG5	BAG family molecular chaperone regulator 5	0.975592	0.0991078	100.505	103.522	103.106	105.212	102.378	106.643	106.227	107.892	105.187	-0.0356501	1.00389
P41091	EIF2S3	Eukaryotic translation initiation factor 2 subunit 3	1.1923	0.0992456	124.306	98.3174	92.7757	109.295	77.8704	78.9214	109.974	92.2979	86.183	0.253745	1.00329
P07099	EPHX1	Epoxide hydrolase 1	1.15814	0.0997066	132.789	125.591	120.496	90.8791	97.4601	98.4569	102.887	109.31	98.8999	0.211812	1.00128
Q9Y2X0	MED16	Mediator of RNA polymerase II transcription subunit 16	1.45566	0.0999066	153.56	93.3229	85.9506	137.682	59.6979	59.0685	120.654	88.378	76.2407	0.541673	1.00041
Q15418	RPS6KA1	Ribosomal protein S6 kinase alpha-1	0.901395	0.100059	89.7314	86.2877	94.3557	95.1614	113.148	102.62	86.3861	99.6687	105.08	-0.149769	0.999744
Q9Y320	TMX2	Thioredoxin-related transmembrane protein 2	0.781603	0.100362	101.922	105.795	101.922	54.8191	131.359	133.461	117.193	96.9419	103.914	-0.355491	0.998432
Q8WVQ1	CANT1	Soluble calcium-activated nucleotidase 1	1.17326	0.100508	108.428	106.894	101.908	115.049	101.333	92.1298	113.604	77.0784	76.4074	0.230522	0.997799
O60502	OGA	Protein O-GlcNAcase	1.10796	0.10054	111.182	99.0171	95.0564	118.777	95.5279	95.8108	103.826	89.8698	93.3589	0.147904	0.997661
O95153	TSPOAP1	Peripheral-type benzodiazepine receptor-associated protein 1	1.29089	0.100672	106.3	131.3	123.1		70.7	68.8	111.7	111.4	103.1	0.368364	0.997093
Q9UHD9	UBQLN2	Ubiquilin-2	1.17748	0.101125	102.783	93.4641	85.1401	122.087	82.0638	86.5878	99.0738	79.1685	81.4305	0.235703	0.995143
Q15276	RABEP1	Rab GTPase-binding effector protein 1	1.2524	0.10124	107.27	92.0618	87.9883	123.354	83.4621	76.4919	109.714	67.7111	72.5089	0.324692	0.994646
Q7Z3E2	CCDC186	Coiled-coil domain-containing protein 186	1.12103	0.101273	98.3	100.2	99.2		103.4	85.2	80.9	91.3	81.8	0.164821	0.994505
P41743	PRKCI	Protein kinase C iota type	0.717244	0.101299	69.7985	80.3027	84.524	82.4517	136.946	149.61	70.9766	94.7336	100.329	-0.479465	0.994393
O75367	MACROH2A1	Core histone macro-H2A.1	0.87737	0.10145	87.0908	102.103	106.216	87.3122	113.311	118.452	89.9698	110.843	112.694	-0.188743	0.993747
Q8NDV7	TNRC6A	Trinucleotide repeat-containing gene 6A protein	1.24174	0.101467	120.9	112.6	108.7		83.5	72.4	122.5	93.3	87.6	0.312369	0.993674
A0A8I5KWQ7	A0A8I5KWQ7	FERM domain-containing protein	0.718782	0.101986	73.7	76.2	87.6		131.6	109.3	65.1	121.2	123.5	-0.476374	0.991458
Q15311	RALBP1	RalA-binding protein 1	1.09733	0.102049	96.0535	96.1503	101.857	106.403	86.3805	79.9962	101.374	93.3451	95.0862	0.133994	0.991192
Q8WVE0	EEF1AKMT1	EEF1A lysine methyltransferase 1	1.11869	0.102192	103.595	121.421	117.143	117.302	89.8438	95.5481	101.049	116.736	110.216	0.161809	0.990585
O95721	SNAP29	Synaptosomal-associated protein 29	1.15929	0.102227	103.713	106.737	110.466	115.337	82.5469	77.1043	94.9441	100.488	115.304	0.213242	0.990435
Q9GZS1	POLR1E	DNA-directed RNA polymerase I subunit RPA49	1.28984	0.102449	130.395	113.618	110.906	105.848	72.0284	62.7863	129.39	91.1154	91.2159	0.367187	0.98949
P04075	ALDOA	Fructose-bisphosphate aldolase A	1.1905	0.102579	125.196	94.9268	89.6584	110.147	79.9837	78.2595	105.08	92.1489	85.4437	0.251568	0.988942
Q9Y333	LSM2	U6 snRNA-associated Sm-like protein LSm2	0.764001	0.103042	85.5221	86.1825	102.252	84.474	108.196	106.875	81.5597	135.272	154.534	-0.388354	0.986987
Q02224	CENPE	Centromere-associated protein E	0.8	0.103103	80.9	85.3	90.6		125	128.4	91.1	99.6	90.9	-0.321928	0.986731
J3KQL8	APOL2	Apolipoprotein L2	1.49531	0.103218	124.5	144	113.7		47.9	46	106.6	118.1	107.4	0.58044	0.986243
Q9BRK4	LZTS2	Leucine zipper putative tumor suppressor 2	0.808488	0.103365	95.4552	105.679	106.234	72.269	133.904	140.349	93.7883	108.123	110.79	-0.306701	0.985625
P22307	SCP2	Sterol carrier protein 2	1.18468	0.103769	101.545	98.7553	92.339	116.728	89.9213	83.04	108.891	78.5765	71.5092	0.244499	0.983932
P28331	NDUFS1	NADH-ubiquinone oxidoreductase 75 kDa subunit, mitochondrial	0.914612	0.10385	97.8883	92.6889	89.9893	91.0142	108.187	110.687	103.088	96.0885	89.7893	-0.128769	0.983593
Q9UGU0	TCF20	Transcription factor 20	1.39811	0.103863	139.1	118.6	116.1		64.1	51.2	117.1	100.2	113	0.483483	0.98354
O75940	SMNDC1	Survival of motor neuron-related-splicing factor 30	0.75993	0.103943	82.7307	106.967	112.211	75.4502	142.74	141.574	76.555	128.058	131.787	-0.396061	0.983206
A0A384DVL8	DSCAML1	Cell adhesion molecule DSCAML1	0.832722	0.104273	90.6	80.2	101.6		105.6	123.6	87	111	118	-0.264093	0.981829
O95067	CCNB2	G2/mitotic-specific cyclin-B2	1.69719	0.104349	179.8	107.9	84.9		57	45.4	117.3	81	65.2	0.763144	0.981512
Q16644	MAPKAPK3	MAP kinase-activated protein kinase 3	1.33027	0.104492	105.917	98.8738	90.7738	136.103	83.9943	67.1779	119.388	68.2344	66.8257	0.411718	0.980917
E9PK25	CFL1	Cofilin-1	0.942931	0.104542	90.2661	101.768	101.973	96.9593	99.9192	102.486	100.227	106.389	109.264	-0.0847762	0.980709
Q14914	PTGR1	Prostaglandin reductase 1	1.1019	0.10482	116.523	122.424	119.849	106.838	95.4928	97.9606	103.003	115.021	116.737	0.139997	0.979555
P29992	GNA11	Guanine nucleotide-binding protein subunit alpha-11	0.65354	0.104974	54.0017	53.1644	53.1644	98.4575	121.567	103.566	134.46	70.1603	65.2206	-0.613652	0.978919
A0A1B0GUA3	KIFBP	KIF-binding protein	1.13086	0.105268	121.154	104.6	104.911	105.984	84.8392	85.4599	96.7373	105.428	110.187	0.177422	0.977702
Q8WUM9	SLC20A1	Sodium-dependent phosphate transporter 1	1.23129	0.105272	91.8382	127.832	124.523	126.001	93.4424	84.1182	75.5961	101.463	122.718	0.300173	0.977687
A0A669KBH4	CUL7	Cullin-7	0.776359	0.105647	63.8	80.6	92.7		120.5	108.7	86	81.2	112.6	-0.365204	0.976144
P30044	PRDX5	Peroxiredoxin-5, mitochondrial	1.1531	0.105765	93.2938	111.363	109.596	125.386	83.3752	89.9549	90.5441	104.685	108.024	0.205516	0.975657
P21127	CDK11B	Cyclin-dependent kinase 11B	0.821124	0.105835	76.984	71.5047	72.7832	96.9096	115.978	110.773	88.4905	82.8286	86.2988	-0.284329	0.97537
A0A8I5KW48	PTPN11	Tyrosine-protein phosphatase non-receptor type 11	1.07314	0.105911	106.699	99.5985	96.8751	102.483	97.3614	93.3736	103.975	89.5803	88.2186	0.101842	0.97506
B8ZZ98	SNRNP27	U4/U6.U5 small nuclear ribonucleoprotein 27 kDa protein	0.834784	0.10603	75.9139	73.4444	71.8896	104.009	111.95	105.456	86.2492	89.4504	93.932	-0.260525	0.97457
Q96JY6	PDLIM2	PDZ and LIM domain protein 2	0.661816	0.106167	58.9118	61.3073	60.8637	73.3307	138.407	127.938	72.0428	68.2277	73.9059	-0.595498	0.974009
P00558	PGK1	Phosphoglycerate kinase 1	1.09174	0.106185	103.055	102.767	96.9989	107.838	85.2706	87.2894	106.228	94.884	96.5183	0.126626	0.973935
Q6P2D0	ZFP1	Zinc finger protein 1 homolog	1.47925	0.106217	97.9824	89.6815	88.2981	170.802	80.5669	64.128	103.923	62.419	66.488	0.564869	0.973804
Q9NQT5	EXOSC3	Exosome complex component RRP40	0.874971	0.106259	84.8256	90.4552	89.5965	88.974	114.309	116.313	95.7031	87.9744	91.2185	-0.192693	0.973633
Q15345	LRRC41	Leucine-rich repeat-containing protein 41	1.35141	0.106787	124.2	142.4	101.2		76	73.7	131.8	92.8	79.3	0.434466	0.971482
Q9NVX0	HAUS2	HAUS augmin-like complex subunit 2	1.31915	0.106976	126.565	157.428	169.032	113.055	84.4563	94.2657	81.5853	133.144	142.954	0.399613	0.970714
Q9Y448	KNSTRN	Small kinetochore-associated protein	1.13502	0.107037	95.577	95.9518	93.047	116.763	92.6722	84.9886	101.105	81.1468	82.0838	0.182713	0.970464
A6NKD9	CCDC85C	Coiled-coil domain-containing protein 85C	1.1304	0.107455	126.565	100.408	101.437	110.132	99.5837	87.1229	109.882	92.5809	95.7734	0.17683	0.968775
Q68CZ1	RPGRIP1L	Protein fantom	0.83868	0.107598	85	81.7	92.1		122.4	102.1	82.3	102.4	105.1	-0.253807	0.968198
Q92844	TANK	TRAF family member-associated NF-kappa-B activator	1.18607	0.107688	120.834	131.907	112.019	112.829	87.0779	87.2929	130.294	92.1306	106.536	0.246188	0.967832
Q92887	ABCC2	ATP-binding cassette sub-family C member 2	1.24843	0.10775	85.2553	99.1221	95.0134	138.144	75.8395	79.6058	75.1547	94.243	93.2159	0.32012	0.967581
O00487	PSMD14	26S proteasome non-ATPase regulatory subunit 14	1.08622	0.108002	119.989	105.106	102.026	105.29	90.633	97.3048	99.9735	105.721	103.977	0.119316	0.966567
P49327	FASN	Fatty acid synthase	0.832666	0.108066	98.6724	104.039	106.886	86.9651	108.419	109.295	97.2487	137.769	142.588	-0.26419	0.966311
P35579	MYH9	Myosin-9	0.854539	0.108107	88.3267	89.118	91.7885	91.7118	125.121	120.571	87.2387	97.6242	97.4264	-0.226781	0.966145
A0A2R8YHD2	TPM4	Tropomyosin alpha-4 chain (Fragment)	1.11905	0.10839	92.7495	100.84	101.129	106.996	98.3357	92.4606	100.069	79.1694	78.6878	0.162274	0.96501
P38117	ETFB	Electron transfer flavoprotein subunit beta	1.20555	0.108737	111.409	105.389	96.5031	110.867	77.3936	72.6162	117.619	78.0624	94.1144	0.269697	0.963624
O94782	USP1	Ubiquitin carboxyl-terminal hydrolase 1	1.13215	0.108908	117.63	97.3839	111.556	102.341	90.5002	98.0925	111.86	89.5891	83.5153	0.179067	0.962939
Q6NXE6	ARMC6	Armadillo repeat-containing protein 6	0.894808	0.108964	102.506	100.32	103.162	88.1283	107.096	98.7903	102.506	116.931	125.236	-0.160349	0.962717
P09496	CLTA	Clathrin light chain A	0.937101	0.109133	89.9929	90.0938	95.6426	88.8289	104.924	92.0106	97.4586	90.6991	101.192	-0.0937231	0.962042
A0A7P0T890	DST	Dystonin	1.09131	0.109357	112.622	105.41	104.173	103.12	89.6445	86.5534	103.864	106.337	100.773	0.126065	0.961154
Q9NQS7	INCENP	Inner centromere protein	0.896335	0.109912	88.8965	87.9542	94.2366	81.8746	112.142	106.069	88.8965	92.0378	93.0848	-0.15789	0.958955
P56381	ATP5F1E	ATP synthase subunit epsilon, mitochondrial	1.62622	0.109928	114.036	71.8058	63.701	154.836	46.8515	41.6616	93.0631	71.8769	57.3735	0.701526	0.958893
Q8TD43	TRPM4	Transient receptor potential cation channel subfamily M member 4	1.16804	0.110208	107.5	112.7	110.8		80.8	77.5	104.4	102.9	106.7	0.224093	0.957787
P62873	GNB1	Guanine nucleotide-binding protein G(I)/G(S)/G(T) subunit beta-1	0.789357	0.110215	85.5109	104.109	97.3557	85.5053	94.9659	89.7709	150.969	131.539	122.604	-0.341249	0.957761
P52788	SMS	Spermine synthase	1.03864	0.110271	103.542	100.103	98.237	105.188	99.907	102.166	97.3529	95.1916	95.2899	0.0546946	0.95754
Q9NTW7	ZFP64	Zinc finger protein 64	0.713171	0.110518	74.9	82.6	71		152.7	109.5	86.6	89.4	95.8	-0.48768	0.956566
Q9UGP8	SEC63	Translocation protein SEC63 homolog	1.48879	0.110815	114.733	82.3748	78.9108	164.425	59.8168	50.1852	95.7237	85.4163	78.6573	0.574142	0.9554
Q92614	MYO18A	Unconventional myosin-XVIIIa	0.904854	0.111002	93.9568	92.7496	92.3473	99.0271	118.905	112.165	98.0812	97.0753	96.0693	-0.144243	0.954668
Q9C0E2	XPO4	Exportin-4	0.85589	0.111269	100.157	101.61	106.976	89.0291	119.607	114.242	88.3081	130.45	128.326	-0.224502	0.953626
P20933	AGA	N(4)-(beta-N-acetylglucosaminyl)-L-asparaginase	1.31458	0.111499	129.9	107	110.7		67.2	64	115.7	85.7	108.1	0.394597	0.952729
Q8NFH4	NUP37	Nucleoporin Nup37	0.927706	0.11157	92.3579	94.2267	94.1284	98.6559	112.029	108.685	94.3251	98.0627	98.0627	-0.10826	0.952453
Q9UHY1	NRBP1	Nuclear receptor-binding protein	1.23721	0.111602	115.67	90.1838	85.9954	128.611	87.5103	92.679	100.61	74.1432	69.8657	0.307085	0.952328
P82933	MRPS9	28S ribosomal protein S9, mitochondrial	0.969359	0.111719	95.8474	97.84	98.4378	99.0646	101.726	100.729	95.7477	102.124	104.117	-0.0448974	0.951875
Q6UXH1	CRELD2	Protein disulfide isomerase CRELD2	1.06076	0.111813	111.667	116.061	112.417	102.104	100.736	105.13	110.381	105.987	98.9144	0.0850929	0.951507
Q9Y2K6	USP20	Ubiquitin carboxyl-terminal hydrolase 20	0.85544	0.11197	121.932	106.811	85.6847	100.812	123.004	104.666	140.27	127.401	111.422	-0.225261	0.950897
Q7Z2W9	MRPL21	39S ribosomal protein L21, mitochondrial	0.907743	0.112969	111.577	100.702	101.572	85.4377	102.986	108.314	109.293	119.298	109.946	-0.139644	0.94704
A0A286YFF8	MON2	Protein MON2 homolog	0.793764	0.11298	73.7567	75.3438	76.0908	108.414	120.625	127.627	82.2527	98.031	96.8173	-0.333218	0.946999
Q9HAV4	XPO5	Exportin-5	0.928303	0.113	110.121	100.331	102.015	92.137	106.437	103.173	108.648	118.228	108.332	-0.107333	0.946923
Q86Y79	PTRH1	Probable peptidyl-tRNA hydrolase	1.1082	0.113105	109.38	111	106.341	106.957	100.771	100.974	113.431	90.2383	83.7565	0.148216	0.946518
Q13867	BLMH	Bleomycin hydrolase	1.07892	0.113139	107.919	110.955	112.525	101.28	93.0556	97.7659	94.207	106.663	109.594	0.109594	0.946389
Q9BPX5	ARPC5L	Actin-related protein 2/3 complex subunit 5-like protein	0.703343	0.113206	81.3396	53.55	59.9902	85.981	137.624	122.803	90.691	78.3401	69.6944	-0.5077	0.946131
Q96EP5	DAZAP1	DAZ-associated protein 1	0.927739	0.113674	92.2021	105.33	105.64	95.2972	104.813	112.358	98.0939	112.048	109.568	-0.108208	0.944338
A0A3B3IUC4	GLA	Alpha-galactosidase	1.15963	0.114043	87.0636	105.573	112.331	126.678	96.2694	93.2334	80.0123	100.579	95.1921	0.213659	0.942931
Q12797	ASPH	Aspartyl/asparaginyl beta-hydroxylase	1.09608	0.114187	104.76	108.617	112.881	99.1301	107.602	101.613	83.7469	97.0449	95.1162	0.132356	0.942384
Q0VGL1	LAMTOR4	Ragulator complex protein LAMTOR4	1.52221	0.114215	142.033	85.8117	74.4978	125.296	44.6465	38.2062	108.875	81.8083	77.6309	0.606165	0.942277
Q9Y679	AUP1	Lipid droplet-regulating VLDL assembly factor AUP1	1.14244	0.114224	98.5895	82.0519	94.4097	112.364	82.0519	85.5957	91.5928	73.3288	91.3202	0.192122	0.942241
O00273	DFFA	DNA fragmentation factor subunit alpha	1.10322	0.114313	97.9789	105.218	106.21	114.56	85.8803	88.9546	95.9956	101.152	108.392	0.141723	0.941904
Q7L099	RUFY3	Protein RUFY3	1.25694	0.114368	121.712	125.045	130.744	97.6701	76.769	65.802	97.8428	108.81	123.325	0.329913	0.941697
Q8NG68	TTL	Tubulin--tyrosine ligase	0.86774	0.11456	90.7	89.3	94.9		102.6	91.3	97.5	114.7	121.9	-0.204665	0.940968
P34949	MPI	Mannose-6-phosphate isomerase	1.245	0.114913	143.313	142.964	140.75	90.0863	83.075	95.7751	100.319	116.515	123.506	0.316145	0.939632
Q9UGI8	TES	Testin	1.49219	0.115068	91.1059	89.3885	82.1916	177.128	77.9389	71.1509	85.6265	66.1622	67.5525	0.577428	0.939046
Q9NT62	ATG3	Ubiquitin-like-conjugating enzyme ATG3	0.898142	0.11508	108.022	105.018	105.018	83.2864	110.247	101.569	116.477	108.912	121.372	-0.154985	0.938999
Q9Y305	ACOT9	Acyl-coenzyme A thioesterase 9, mitochondrial	1.15735	0.115109	116.512	119.371	112.53	107.011	79.7511	81.2829	109.875	111.304	109.671	0.210821	0.938891
P46199	MTIF2	Translation initiation factor IF-2, mitochondrial	0.845507	0.115219	91.3545	83.8617	83.4774	90.7501	113.353	100.192	127.378	86.5514	89.145	-0.242112	0.938477
A0A286YES1	IGHG3	Immunoglobulin heavy constant gamma 3 (Fragment)	1.34505	0.115288	149.9	93.6	94		75.3	65.2	95.9	89.8	92	0.42766	0.938214
P50570	DNM2	Dynamin-2	1.02688	0.115556	103.377	101.386	102.879	104.628	98.7962	98.099	98.3978	102.481	104.075	0.0382666	0.937209
Q04837	SSBP1	Single-stranded DNA-binding protein, mitochondrial	1.06525	0.115668	97.581	99.8952	102.595	103.644	86.9744	90.2528	102.884	94.9776	98.6417	0.0911987	0.936787
Q9NY61	AATF	Protein AATF	0.824972	0.115914	92.9388	88.1753	88.682	82.1088	124.56	129.83	104.29	89.3915	85.1348	-0.277582	0.935866
Q02487	DSC2	Desmocollin-2	1.67753	0.116163	56.5691	197.555	152.436	137.231	58.8978	56.0839	56.9572	116.146	117.116	0.746341	0.93493
Q9Y5T5	USP16	Ubiquitin carboxyl-terminal hydrolase 16	1.08083	0.116597	117.359	119.208	119.208	99.6915	98.8685	102.893	107.026	107.461	110.507	0.112139	0.933312
Q8NF91	SYNE1	Nesprin-1	0.703762	0.116782	60.6	86.5	94.6		124.7	119	66.7	119.3	142.7	-0.506841	0.932625
A0A7P0T9K5	CIC	Protein capicua homolog	1.25529	0.117062	84.2062	88.6381	85.5193	117.716	76.9017	67.7917	101.606	60.8976	67.2993	0.328018	0.931583
Q5JWT2	MED23	Mediator of RNA polymerase II transcription subunit 23	1.18502	0.117564	120.078	90.1273	88.7576	119.244	80.5393	76.6128	99.5327	96.3367	88.1184	0.244911	0.929724
O95881	TXNDC12	Thioredoxin domain-containing protein 12	1.10287	0.118023	96.379	106.499	104.957	103.904	95.2225	99.6559	105.246	84.5244	82.0186	0.141263	0.928034
Q9UKK3	PARP4	Protein mono-ADP-ribosyltransferase PARP4	1.06736	0.118211	109.069	99.4655	98.0936	103.893	95.6437	88.49	104.659	96.6236	95.3497	0.0940489	0.927342
Q9NZ45	CISD1	CDGSH iron-sulfur domain-containing protein 1	1.15646	0.118238	106.224	108.967	82.5766	112.222	79.6443	84.4683	102.819	81.1577	95.0624	0.209714	0.927244
A6NCM1	IQCA1L	IQ and AAA domain-containing protein 1-like	1.24218	0.118513	109.6	107.4	96.7		86.4	62.5	111.9	75.7	84.4	0.312874	0.926235
Q9H7B2	RPF2	Ribosome production factor 2 homolog	0.870899	0.118517	98.6696	112.923	114.028	80.4599	120.658	127.619	101.653	119.111	113.807	-0.199422	0.926218
Q9BT40	INPP5K	Inositol polyphosphate 5-phosphatase K	1.18825	0.118886	98.3	118.1	119.4		86.1	91.3	77.2	112.4	104	0.248841	0.924869
P48509	CD151	CD151 antigen	0.872634	0.119002	93.7	93.9	84.4		117	105.7	91.8	112.8	92.2	-0.196552	0.924446
Q9Y2R4	DDX52	Probable ATP-dependent RNA helicase DDX52	0.889	0.119049	99.2396	103.9	105.806	89.5218	112.479	123.705	91.2962	116.503	116.291	-0.169745	0.924274
P46781	RPS9	40S ribosomal protein S9	1.08401	0.119168	113.533	100.345	100.147	107.318	88.149	90.6278	102.923	101.535	102.626	0.116379	0.923842
Q68D91	MBLAC2	Acyl-coenzyme A thioesterase MBLAC2	1.27025	0.119183	74.9745	80.8306	94.5224	129.695	75.7993	67.4688	76.2117	85.697	68.7885	0.345109	0.923785
Q9P2X0	DPM3	Dolichol-phosphate mannosyltransferase subunit 3	1.16707	0.11927	121.31	89.9536	96.6168	106.743	89.4636	69.5719	100.34	92.9912	91.7173	0.222894	0.923467
Q14195	DPYSL3	Dihydropyrimidinase-related protein 3	0.86725	0.119916	92.7508	104.749	100.471	79.4458	124.259	121.338	97.3414	100.263	100.784	-0.20548	0.921125
P24844	MYL9	Myosin regulatory light polypeptide 9	0.709718	0.120346	73.2075	72.4172	83.8775	78.0589	153.034	135.449	70.7377	83.9763	98.4992	-0.494683	0.919568
Q9NQH7	XPNPEP3	Xaa-Pro aminopeptidase 3	0.902354	0.120514	93.3255	96.6363	101.706	89.5481	115.777	111.949	88.6695	102.741	108.949	-0.148235	0.918964
O14980	XPO1	Exportin-1	0.887032	0.120718	97.1592	96.4418	99.9264	95.4247	116.632	116.837	85.4755	117.759	111.405	-0.172942	0.918229
O75113	N4BP1	NEDD4-binding protein 1	1.15187	0.121334	124.847	105.733	108.072	100.453	83.9767	78.7917	101.565	110.715	101.463	0.203982	0.916016
P14868	DARS1	Aspartate--tRNA ligase, cytoplasmic	1.14547	0.122143	124.53	105.72	98.3767	102.306	92.3413	84.6965	114.069	91.5366	87.6136	0.195941	0.913131
Q6P4I2	WDR73	WD repeat-containing protein 73	1.40532	0.122279	143.8	109	97.8		64	63.1	126.7	73	89	0.490902	0.912649
Q9H6Z4	RANBP3	Ran-binding protein 3	1.20532	0.122285	122.433	107.88	102.893	104.381	81.2151	76.6353	124.876	86.1003	84.9808	0.269418	0.912627
P52655	GTF2A1	Transcription initiation factor IIA subunit 1	0.867639	0.122656	92.6711	102.345	106.632	89.7899	112.898	113.668	87.5044	125.65	124.221	-0.204833	0.91131
Q6NTE8	MRNIP	MRN complex-interacting protein	0.912127	0.122791	93.778	93.0542	107.736	94.8864	113.526	117.145	96.7764	106.289	99.9816	-0.132693	0.910834
Q53F19	NCBP3	Nuclear cap-binding protein subunit 3	1.29994	0.122935	142.6	90	96		87.2	63.6	89.7	94.5	86.3	0.37845	0.910325
O43815	STRN	Striatin	1.16213	0.123037	95.6412	100.611	97.8916	115.925	101.267	100.329	92.8282	74.1688	72.481	0.216769	0.909965
G3XAN8	TIMM8B	Mitochondrial import inner membrane translocase subunit	1.36389	0.123166	125.267	120.687	101.511	112.646	86.5324	81.6668	137.288	69.3595	46.8439	0.447725	0.90951
Q96PZ2	FAM111A	Serine protease FAM111A	0.747299	0.123563	60.3763	79.7829	92.5247	97.3888	132.514	126.633	62.3365	111.833	118.792	-0.420243	0.90811
P49589	CARS1	Cysteine--tRNA ligase, cytoplasmic	1.05715	0.124046	97.2639	102.797	96.3903	106.219	97.9434	97.1669	87.0716	97.9434	96.002	0.0801806	0.906417
Q86WV6	STING1	Stimulator of interferon genes protein	0.874672	0.124121	70.514	87.0894	81.7779	98.7028	106.687	85.8073	96.247	104.855	89.562	-0.193186	0.906156
Q9BQA9	CYBC1	Cytochrome b-245 chaperone 1	1.19027	0.124329	128.1	97.2	97.5		86.4	76.3	104.1	93.2	92	0.251283	0.905426
Q6P6B7	ANKRD16	Ankyrin repeat domain-containing protein 16	1.36684	0.124371	144.77	110.33	106.525	102.88	63.8752	65.5772	138.463	72.5854	84.2992	0.45084	0.905282
O94889	KLHL18	Kelch-like protein 18	1.20124	0.124463	113.928	100.249	80.574	120.314	87.8819	83.4784	105.402	84.228	70.9239	0.264521	0.904958
H0YNE7	FGF7	Fibroblast growth factor (Fragment)	1.42776	0.124987	122.689	108.35	92.6662	118.304	71.068	61.4787	140.344	56.8185	57.2666	0.513758	0.903137
Q15388	TOMM20	Mitochondrial import receptor subunit TOM20 homolog	0.868343	0.125063	93.3469	100.871	105.452	90.3137	112.54	112.104	87.4582	119.41	129.879	-0.203663	0.902873
O60870	KIN	DNA/RNA-binding protein KIN17	0.71329	0.125072	142.872	117.161	121.397	34.4594	152.514	148.423	175.303	111.318	141.265	-0.487439	0.902839
A0A804HKI2	LRPPRC	Leucine-rich PPR motif-containing protein, mitochondrial	0.91309	0.125333	99.9099	100.115	101.246	95.9967	101.143	99.9099	102.274	119.954	120.57	-0.13117	0.901935
P53007	SLC25A1	Tricarboxylate transport protein, mitochondrial	1.18353	0.125433	141.885	116.749	113.883	97.4133	83.1245	87.0933	109.142	111.457	105.504	0.243099	0.901587
Q6P597	KLC3	Kinesin light chain 3	1.22841	0.12553	104.594	84.6121	82.667	122.333	87.795	79.3073	97.9627	70.0238	66.0452	0.296791	0.901252
E9PL57	NEDD8-MDP1	NEDD8-MDP1 readthrough (Fragment)	0.855275	0.126047	88.3	91.6	94.9		116.5	120.2	85.2	99.9	113.7	-0.225539	0.899466
P17152	TMEM11	Transmembrane protein 11, mitochondrial	1.39634	0.126524	156.1	94.2	93.2		66.5	62.9	102.5	94.4	83.7	0.481652	0.897828
Q9ULU4	ZMYND8	Protein kinase C-binding protein 1	0.758186	0.127047	78.3957	69.401	61.4478	118.04	95.2489	82.9404	135.772	116.931	108.694	-0.399377	0.896037
A0A087WUZ3	SPTBN1	Spectrin beta chain	1.06925	0.127557	95.4077	103.505	104.578	109.241	103.895	99.1148	88.2863	94.4322	96.7735	0.096597	0.894296
Q8WXS8	ADAMTS14	A disintegrin and metalloproteinase with thrombospondin motifs 14	0.856538	0.127728	85.6	99.7	86		125.5	110.8	92.2	96.1	103.3	-0.22341	0.893713
Q96KN7	RPGRIP1	X-linked retinitis pigmentosa GTPase regulator-interacting protein 1	1.33863	0.127811	72.1839	152.049	144.578	100.522	79.0235	77.866	91.6504	99.1213	90.5982	0.420757	0.893431
Q641Q2	WASHC2A	WASH complex subunit 2A	1.0835	0.127898	97.1141	105.447	100.685	113.776	101.479	104.653	89.2775	90.4679	95.2294	0.115695	0.893136
L0R819	ASDURF	ASNSD1 upstream open reading frame protein	0.807213	0.128107	75.1788	80.8343	79.7617	100.474	106.284	101.994	70.3034	122.178	119.935	-0.308978	0.892428
O15479	MAGEB2	Melanoma-associated antigen B2	1.26921	0.12815	135.408	93.8378	85.7677	108.22	74.6949	67.4694	112.324	85.017	77.3223	0.343931	0.892283
Q5JTD0	TJAP1	Tight junction-associated protein 1	0.522869	0.128463	60.3489	57.2111	50.8311	54.8205	139.524	97.374	188.995	51.5632	56.1652	-0.935478	0.891223
P50402	EMD	Emerin	0.815116	0.128474	107.313	99.2143	97.4027	65.2102	138.218	122.766	110.51	101.239	93.3531	-0.294924	0.891184
Q96RV3	PCNX1	Pecanex-like protein 1	0.703612	0.128731	83.8	82.8	72.6		146	147.2	78.1	91.8	103.5	-0.507148	0.890318
Q8N3E9	PLCD3	1-phosphatidylinositol 4,5-bisphosphate phosphodiesterase delta-3	1.12247	0.12916	99.9231	118.665	119.183	100.18	96.6096	93.1926	84.2875	103.133	110.485	0.166681	0.888873
P51178	PLCD1	1-phosphatidylinositol 4,5-bisphosphate phosphodiesterase delta-1	0.718034	0.129209	82.3189	79.8149	84.8229	71.1615	80.3365	71.9899	115.914	126.66	158.899	-0.477876	0.888706
P23229	ITGA6	Integrin alpha-6	1.09084	0.129308	94.933	105.191	99.5781	110.807	93.4814	89.9977	107.513	87.8687	91.546	0.125433	0.888374
P17405	SMPD1	Sphingomyelin phosphodiesterase	1.37167	0.129421	103.017	91.1979	79.7144	136.948	79.7982	58.256	114.333	62.7824	59.2619	0.455935	0.887995
P62070	RRAS2	Ras-related protein R-Ras2	1.22241	0.129485	121.027	93.46	92.7876	116.084	68.1979	66.469	104.026	100.76	93.46	0.289733	0.887781
A0A3B3IRZ4	IQSEC1	IQ motif and SEC7 domain-containing protein 1	0.812695	0.129875	98.2632	80.6421	85.7211	70.4401	132.261	112.775	96.3974	81.575	92.3549	-0.299214	0.886473
Q9NQG1	MANBAL	Protein MANBAL	1.27867	0.130001	91.1951	99.5339	96.1629	143.152	71.1464	60.501	97.4936	96.9613	94.3	0.354641	0.886052
Q9NQW7	XPNPEP1	Xaa-Pro aminopeptidase 1	1.12773	0.130263	91.306	95.3275	93.4082	121.691	92.8598	94.3221	87.8329	85.4566	84.8168	0.173424	0.88518
A0A7P0Z494	DBT	Dihydrolipoamide acetyltransferase component of pyruvate dehydrogenase complex	1.14825	0.130308	123.281	102.651	95.8741	107.098	92.087	83.9148	114.81	88.3995	87.7019	0.199431	0.88503
P29373	CRABP2	Cellular retinoic acid-binding protein 2	0.905411	0.130358	85.2785	88.4692	89.0493	96.6159	105.97	108.58	83.0547	100.555	98.0413	-0.143355	0.884861
O95302	FKBP9	Peptidyl-prolyl cis-trans isomerase FKBP9	1.16218	0.130582	91.2348	92.0414	93.1169	127.234	90.6075	90.1594	91.5037	78.7774	83.0793	0.216834	0.884116
P13984	GTF2F2	General transcription factor IIF subunit 2	0.921451	0.130764	107.323	105.685	106.449	86.4153	111.144	116.712	108.633	103.283	110.817	-0.118021	0.883511
P48147	PREP	Prolyl endopeptidase	0.95834	0.130779	100.443	95.9366	95.4359	103.353	105.35	104.849	96.5375	103.748	104.949	-0.0613904	0.883462
H0YHP2	BICDL1	BICD family-like cargo adapter 1	1.14342	0.131075	87	116.1	110.7		99.9	82.9	93.3	89	92.3	0.193355	0.88248
A0A8I5KVU2	LARP4B	La-related protein 4B	0.91259	0.131075	94.5936	105.423	106.909	89.6088	114.128	116.464	95.443	107.334	109.775	-0.131962	0.882479
P30260	CDC27	Cell division cycle protein 27 homolog	1.05961	0.131157	104.655	98.4703	94.7016	111.587	96.3444	94.7982	99.5333	96.2478	96.0545	0.0835318	0.88221
A0A8Q3SID9	CASP8	Caspase-8	0.943458	0.131236	102.352	101.523	99.0338	91.2567	102.041	105.152	96.9598	110.545	107.537	-0.0839698	0.881947
P45877	PPIC	Peptidyl-prolyl cis-trans isomerase C	0.872875	0.132335	99.7256	108.701	111.249	86.9347	114.463	123.438	92.4124	125.322	126.652	-0.196154	0.878324
Q9UP95	SLC12A4	Solute carrier family 12 member 4	1.17196	0.132532	88.5581	93.0217	92.5753	118.812	99.36	91.504	82.3983	72.9354	72.9354	0.228928	0.877678
P0DMN0	SULT1A4	Sulfotransferase 1A4	1.24374	0.132714	117.58	134.901	142.229	109.272	76.1663	81.8288	92.2656	123.021	133.236	0.31469	0.877085
A0A8I5KP51	RARS2	Arginine--tRNA ligase	1.03887	0.132877	109.3	101.5	100.3		99.7	97.8	101.6	100.7	99.3	0.0550151	0.876551
P60896	SEM1	26S proteasome complex subunit SEM1	1.5316	0.133723	96.3763	80.4139	77.3269	159.192	52.254	46.607	110.682	60.2352	67.5387	0.615043	0.873793
Q01433	AMPD2	AMP deaminase 2	1.21353	0.133899	112.303	86.3592	82.4093	123.921	75.9458	67.7767	94.8874	90.8477	87.7057	0.279211	0.873222
Q9H3Q1	CDC42EP4	Cdc42 effector protein 4	0.728377	0.133987	70.0987	76.1857	83.2545	65.0258	133.521	133.129	96.1158	75.3021	67.4479	-0.457243	0.872937
A0A0C4DFM7	TUT4	Terminal uridylyltransferase 4	1.19792	0.1343	103.675	120.252	80.8234	125.97	95.9954	82.7902	76.1407	104.424	90.0952	0.260532	0.871925
O14944	EREG	Proepiregulin	1.20914	0.134347	130.3	99.7	94.8		90.4	71.6	103.3	96.7	85.7	0.273985	0.871771
O75815	BCAR3	Breast cancer anti-estrogen resistance protein 3	0.847426	0.134431	91.2848	104.05	106.302	87.4942	119.389	135.801	86.6723	107.375	124.752	-0.23884	0.871502
F5H2J1	MYO3B	Myosin-IIIb (Fragment)	1.52719	0.134572	86.6	152.4	149.7		57.7	41.8	91	110.5	123.2	0.610878	0.871046
Q08378	GOLGA3	Golgin subfamily A member 3	1.12431	0.134663	114.475	107.073	103.727	100.716	95.1084	90.8498	115.793	81.7242	90.14	0.169034	0.870752
Q8N5W9	RFLNB	Refilin-B	0.867201	0.134964	83.3471	94.3871	100.454	93.9348	122.335	122.534	86.4304	105.328	99.7579	-0.205562	0.869781
A0A499FI48	PDIA4	Protein disulfide-isomerase	0.945436	0.13501	93.2087	99.7425	101.989	88.9786	106.787	103.418	101.886	97.2924	98.2112	-0.0809489	0.869635
A0A8Q3SIA4	AFTPH	Aftiphilin	0.864661	0.135017	93.6526	103.168	100.709	86.8013	120.38	132.995	93.7595	111.613	96.8599	-0.209793	0.869612
Q1KMD3	HNRNPUL2	Heterogeneous nuclear ribonucleoprotein U-like protein 2	0.908836	0.135042	86.2921	91.2314	89.1976	94.5816	108.18	109.148	102.272	89.0039	88.326	-0.137908	0.86953
A0A3B3ISQ4	EPS8L2	Epidermal growth factor receptor kinase substrate 8-like protein 2	0.878706	0.135065	85.7257	91.719	97.6053	82.1592	93.0033	95.9999	88.0802	112.91	118.154	-0.186548	0.869456
Q8NFG4	FLCN	Folliculin	1.08518	0.135547	104.4	108.7	100.8		101	96.6	83.7	98.2	102.6	0.117938	0.867911
Q8WVP5	TNFAIP8L1	Tumor necrosis factor alpha-induced protein 8-like protein 1	0.851389	0.135729	94.4722	112.129	109.655	90.9616	113.029	117.978	92.8976	133.386	140.584	-0.23211	0.867329
P20073	ANXA7	Annexin A7	1.19849	0.135735	137.395	107.828	101.625	98.2109	84.6702	79.2943	117.442	95.9389	86.8412	0.261218	0.86731
A0A087WY31	YTHDF3	YTH domain-containing family protein 3	1.40827	0.136063	153.327	96.9967	82.6548	109.45	65.0104	56.0467	123.227	82.0887	66.3314	0.493926	0.866259
Q9NRY4	ARHGAP35	Rho GTPase-activating protein 35	0.898603	0.136252	92.2543	81.1488	88.0654	100.595	114.076	98.1968	87.0912	102.191	102.094	-0.154244	0.865657
Q7L8L6	FASTKD5	FAST kinase domain-containing protein 5, mitochondrial	0.880809	0.136655	103.616	111.113	113.351	75.3031	122.75	110.33	110.553	113.351	115.477	-0.1831	0.864376
P29084	GTF2E2	Transcription initiation factor IIE subunit beta	0.936995	0.136794	91.8543	106.341	103.876	96.4173	109.629	111.479	98.2245	108.396	103.876	-0.0938862	0.863932
P12081	HARS1	Histidine--tRNA ligase, cytoplasmic	1.06456	0.136827	113.617	102.602	102.5	100.637	92.3009	92.9128	103.622	101.99	101.582	0.0902508	0.863829
Q9UFN0	NIPSNAP3A	Protein NipSnap homolog 3A	1.35496	0.136976	147.8	92.4	91.9		81.4	61.9	105	90.3	69.9	0.438247	0.863355
P60174	TPI1	Triosephosphate isomerase	1.18581	0.137091	105.873	104.562	90.8952	117.465	90.2399	93.0482	112.613	76.7601	68.8033	0.245878	0.862991
O14965	AURKA	Aurora kinase A	1.3541	0.137118	95.927	82.6655	75.9951	138.796	87.6683	74.8834	91.7976	54.1574	54.6339	0.437335	0.862906
P28072	PSMB6	Proteasome subunit beta type-6	1.29879	0.13768	129.918	98.7919	90.4787	111.994	79.8455	68.5357	127.115	68.8257	70.6623	0.377171	0.861128
Q7L2H7	EIF3M	Eukaryotic translation initiation factor 3 subunit M	0.902805	0.137771	99.3188	90.1245	93.9638	96.8547	110.736	115.485	85.8809	110.029	104.371	-0.147514	0.860844
P52701	MSH6	DNA mismatch repair protein Msh6	0.907017	0.138449	99.0592	96.9101	99.4685	96.4048	99.5708	101.72	97.2171	119.731	121.777	-0.140799	0.85871
O75146	HIP1R	Huntingtin-interacting protein 1-related protein	1.26966	0.138526	101.251	102.466	106.206	132.314	66.9395	57.9643	88.2554	108.356	113.872	0.344447	0.858469
P05141	SLC25A5	ADP/ATP translocase 2	1.05889	0.138539	101.631	111.926	106.577	104.859	95.4748	99.31	94.4656	108.494	103.952	0.0825472	0.858427
Q8NI77	KIF18A	Kinesin-like protein KIF18A	1.14388	0.138545	82.4008	99.2688	104.504	99.8142	93.6461	83.1764	64.7574	89.4776	90.7379	0.193939	0.858411
A0A6Q8PFY7	TFG	Protein TFG	1.16863	0.138732	95.1459	98.7878	91.0487	114.918	82.3991	81.3065	110.897	76.0257	77.1182	0.224812	0.857824
P82673	MRPS35	28S ribosomal protein S35, mitochondrial	0.897766	0.139021	103.478	88.4553	91.7168	77.4403	106.542	110.89	98.0421	94.3853	92.9028	-0.155588	0.856921
Q16186	ADRM1	Proteasomal ubiquitin receptor ADRM1	1.18092	0.139425	100.556	85.6753	86.1156	130.276	86.2917	82.3293	83.8262	86.2036	87.5244	0.239913	0.855658
Q9UN36	NDRG2	Protein NDRG2	1.40497	0.139613	123.9	119.3	122.4		49.9	52.8	90.7	116.8	123.5	0.490534	0.855076
Q96N66	MBOAT7	Lysophospholipid acyltransferase 7	1.07795	0.139892	94.3366	102.08	98.7748	112.548	96.9806	95.4697	89.4262	102.174	88.7651	0.108297	0.854206
Q8IWL3	HSCB	Iron-sulfur cluster co-chaperone protein HscB	1.35788	0.13999	154.981	127.756	106.252	102.043	73.73	65.679	145.765	77.8614	88.9845	0.441361	0.853904
Q969Z3	MTARC2	Mitochondrial amidoxime reducing component 2	0.912299	0.140156	99.1556	80.4526	84.213	101.267	107.666	98.364	100.541	93.5151	100.145	-0.132421	0.853389
Q7Z3K3	POGZ	Pogo transposable element with ZNF domain	1.07933	0.140487	98.7386	111.466	111.665	102.869	93.0708	92.3747	93.8663	104.207	108.384	0.110131	0.852363
Q93034	CUL5	Cullin-5	1.08335	0.140881	116.2	103.8	97.4		100.3	103	91.5	97.6	95.9	0.1155	0.851149
P62495	ETF1	Eukaryotic peptide chain release factor subunit 1	0.90297	0.141291	91.9743	94.3066	99.9852	97.9431	114.79	115.602	86.2956	108.605	106.577	-0.14725	0.849886
O14647	CHD2	Chromodomain-helicase-DNA-binding protein 2	0.932893	0.141542	106	107.517	103.074	95.0526	111.636	117.597	102.748	117.055	102.532	-0.100216	0.849114
O14975	SLC27A2	Long-chain fatty acid transport protein 2	0.848241	0.141554	94.6597	99.4198	100.069	91.411	102.341	89.6833	109.373	125.167	141.611	-0.237454	0.849077
B4DZS0	DFFB	DNA fragmentation factor subunit beta	0.918164	0.141877	96.7	94.6	93.9		110.3	112.7	91.8	102.5	100.4	-0.123177	0.848089
Q5SPY9	NPDC1	Neural proliferation differentiation and control protein 1	0.750013	0.142029	73.1509	85.242	96.4262	84.0993	127.561	164.035	90.6829	92.6981	89.8769	-0.415012	0.847623
Q9H9A7	RMI1	RecQ-mediated genome instability protein 1	0.804598	0.142129	87.1685	96.7241	103.625	79.4767	131.868	144.502	80.6919	109.359	103.732	-0.313659	0.847317
Q16566	CAMK4	Calcium/calmodulin-dependent protein kinase type IV	0.906235	0.14233	92.0182	95.4148	102.723	100.491	110.031	106.325	89.6508	112.81	120.015	-0.142043	0.846702
P49903	SEPHS1	Selenide, water dikinase 1	0.943472	0.14258	95.7974	96.9101	100.653	97.64	98.4275	113.702	96.6067	103.485	105.812	-0.0839488	0.845941
Q9NZT2	OGFR	Opioid growth factor receptor	1.10517	0.142613	110.993	95.3724	92.4617	105.027	93.82	92.6558	103.328	87.4166	79.5578	0.144267	0.845842
Q96F63	CCDC97	Coiled-coil domain-containing protein 97	1.2378	0.14291	138.712	113.04	104.272	102.918	93.4958	85.995	130.155	77.8603	75.9587	0.30778	0.844939
A0A5F9ZHB6	PRIM1	DNA primase	0.948903	0.142974	102.718	105.745	102.718	96.3676	101.465	101.465	109.607	110.651	113.678	-0.075667	0.844741
Q9P265	DIP2B	Disco-interacting protein 2 homolog B	0.899733	0.143168	101.028	99.9622	104.332	93.1726	103.372	102.84	98.5768	124.899	123.94	-0.152432	0.844153
Q8NFZ8	CADM4	Cell adhesion molecule 4	1.11676	0.143322	101.519	92.7238	86.5484	111.006	95.6243	88.4198	93.1916	74.8527	86.4549	0.159316	0.843688
P36952	SERPINB5	Serpin B5	0.925696	0.143446	84.212	81.5295	83.4456	89.5213	101.936	97.1456	86.9904	85.8407	85.4575	-0.11139	0.843312
Q9ULW0	TPX2	Targeting protein for Xklp2	0.855183	0.143468	87.5677	78.613	75.1254	87.9683	111.604	107.834	102.744	76.445	82.6662	-0.225696	0.843246
P98170	XIAP	E3 ubiquitin-protein ligase XIAP	1.09322	0.143909	94.4832	114.569	109.752	102.426	96.3278	85.8752	102.374	104.731	92.3312	0.128586	0.841914
Q9Y2K1	ZBTB1	Zinc finger and BTB domain-containing protein 1	1.30341	0.144036	78.6569	112.026	95.7673	155.949	85.467	69.974	83.424	83.5942	101.811	0.382295	0.841527
O75533	SF3B1	Splicing factor 3B subunit 1	0.906512	0.14406	96.7213	106.88	108.679	90.6207	112.595	110.584	94.4991	118.627	119.261	-0.141602	0.841456
P46937	YAP1	Transcriptional coactivator YAP1	0.913885	0.144176	96.7965	100.622	103.49	91.2325	107.422	109.972	90.74	110.078	118.153	-0.129915	0.841107
Q76N32	CEP68	Centrosomal protein of 68 kDa	0.843542	0.144221	87.7	71.7	76.1		105.7	83.1	108.6	79.3	88.6	-0.245469	0.840971
Q6P0N0	MIS18BP1	Mis18-binding protein 1	1.37388	0.144333	83.7054	80.1519	69.5702	143.775	72.571	64.2005	76.9142	52.7502	76.7563	0.458252	0.840634
P63241	EIF5A	Eukaryotic translation initiation factor 5A-1	0.858311	0.144387	94.2607	100.063	108.712	86.5113	113.638	116.923	83.8602	126.885	126.009	-0.220427	0.840471
Q92576	PHF3	PHD finger protein 3	1.34436	0.144655	135.8	97.6	88.6		60.6	60.4	99.4	104.5	74.3	0.426915	0.839667
Q5VUA4	ZNF318	Zinc finger protein 318	1.23794	0.144688	127.14	113.752	92.5453	110.114	84.2387	75.5412	129.192	81.991	76.9093	0.307939	0.839567
P10155	RO60	RNA-binding protein RO60	1.19186	0.144947	132.309	102.061	95.5509	103.836	94.95	91.6448	114.18	80.4271	73.7165	0.253209	0.838792
Q8NEL9	DDHD1	Phospholipase DDHD1	1.09106	0.144959	102.334	95.9382	99.2331	116.623	93.8063	86.4413	91.0929	99.7176	103.4	0.125726	0.838756
P40121	CAPG	Macrophage-capping protein	1.12989	0.145145	104.973	109.326	119.688	102.135	92.02	90.0511	79.8957	107.46	113.056	0.17618	0.838198
P09104	ENO2	Gamma-enolase	1.12864	0.145285	92.286	109.577	110.467	117.146	91.1003	94.1634	78.5518	104.341	107.502	0.174579	0.837779
Q9Y2R0	COA3	Cytochrome c oxidase assembly factor 3 homolog, mitochondrial	1.18394	0.145611	126.188	109.446	114.05	114.915	84.5436	72.6154	95.6347	123.153	114.573	0.243602	0.836805
Q96HP0	DOCK6	Dedicator of cytokinesis protein 6	1.13324	0.145797	132.796	99.1015	102.127	98.3636	96.9108	86.5834	97.7454	100.979	94.7202	0.180449	0.836251
Q01581	HMGCS1	Hydroxymethylglutaryl-CoA synthase, cytoplasmic	0.87085	0.145855	89.9417	91.5059	89.9417	93.7447	125.039	119.271	97.9582	89.4529	92.3858	-0.199504	0.836078
O95865	DDAH2	N(G),N(G)-dimethylarginine dimethylaminohydrolase 2	1.15788	0.146119	109.476	100.596	93.9616	110.998	93.9616	89.9612	113.086	73.6667	77.3744	0.211491	0.835293
E7ETB3	DNPEP	Aspartyl aminopeptidase	0.819888	0.1468	90.7159	98.0894	103.34	88.6057	112.613	107.362	81.4432	143.336	135.739	-0.286501	0.833274
P08236	GUSB	Beta-glucuronidase	1.31148	0.146883	171.78	122.996	104.012	94.941	88.479	73.7516	126.218	92.1608	89.9747	0.391196	0.833027
F8WEC0	MMADHC	Cobalamin-trafficking protein CblD	0.913481	0.14717	87.5	89.9	95		109.7	104.7	89.9	92.6	100.1	-0.130554	0.83218
P55957	BID	BH3-interacting domain death agonist	0.866542	0.147372	94.81	89.9479	89.9479	84.8183	117.601	124.691	91.5686	96.6333	88.1247	-0.206658	0.831586
Q8WV92	MITD1	MIT domain-containing protein 1	0.73035	0.147602	86.8	79.4	84.5		98.9	90.2	90.1	132.7	160.2	-0.45334	0.830907
Q9P2G9	KLHL8	Kelch-like protein 8	1.12224	0.148318	95.9	115.7	111.2		106.4	101.6	86.7	99.2	85.5	0.166376	0.828807
O00410	IPO5	Importin-5	0.937246	0.148378	104.548	105.702	103.29	94.2924	107.065	107.799	98.7809	117.237	113.042	-0.0935002	0.82863
Q8IY37	DHX37	Probable ATP-dependent RNA helicase DHX37	1.11676	0.148459	130.219	107.167	99.6876	102.743	93.5403	94.1551	108.601	103.376	92.6183	0.159317	0.828393
Q8ND04	SMG8	Nonsense-mediated mRNA decay factor SMG8	1.15396	0.148876	112.731	91.0961	91.0961	120.306	83.1252	78.5704	90.6216	106.753	90.7165	0.206594	0.827176
P46782	RPS5	40S ribosomal protein S5	0.880318	0.149243	92.6422	102.367	108.431	87.5806	111.359	120.038	86.7868	117.946	119.097	-0.183903	0.826106
P31153	MAT2A	S-adenosylmethionine synthase isoform type-2	1.15078	0.149449	113.534	97.8487	90.566	109.693	84.7773	83.8436	113.721	82.5365	82.2564	0.20261	0.825507
K7EL43	TRIM16	Tripartite motif-containing protein 16 (Fragment)	1.19385	0.149681	155.86	112.298	102.298	99.3939	95.976	92.2979	104.252	103.102	96.3208	0.255619	0.824833
Q3KRA6	C2orf76	UPF0538 protein C2orf76	0.883779	0.149735	96.2055	94.019	107.575	84.8099	110.527	106.263	87.0222	118.07	119.273	-0.178243	0.824676
P14923	JUP	Junction plakoglobin	1.16828	0.150015	115.67	101.248	99.6785	105.658	74.9551	71.0307	113.708	96.3428	95.7542	0.224389	0.823867
Q9UPY8	MAPRE3	Microtubule-associated protein RP/EB family member 3	1.07358	0.150152	102.338	111.933	110.798	112.277	90.5776	102.441	97.3864	111.21	107.6	0.102426	0.82347
O75410	TACC1	Transforming acidic coiled-coil-containing protein 1	0.90178	0.150157	85.6825	78.1911	80.8131	90.6596	103.287	95.8895	99.0733	77.5356	89.0536	-0.149152	0.823453
Q14517	FAT1	Protocadherin Fat 1	1.09767	0.150411	105.01	111.693	112.706	113.782	91.7442	92.6555	93.2631	111.997	115.035	0.134445	0.82272
Q92896	GLG1	Golgi apparatus protein 1	1.07912	0.150706	110.472	101.727	96.2863	105.792	98.6182	93.3715	108.043	91.1368	88.7078	0.109859	0.82187
P62263	RPS14	40S ribosomal protein S14	1.18457	0.150911	106.826	80.5687	78.1739	112.541	73.6409	68.8512	92.885	85.1873	78.4305	0.244365	0.821279
P18206	VCL	Vinculin	1.08779	0.151453	100.27	102.333	101.743	110.836	85.3426	84.9498	103.02	101.645	102.136	0.121398	0.819722
P51570	GALK1	Galactokinase	1.17412	0.151743	104.328	87.8506	86.0299	118.818	89.8534	85.7567	101.415	72.3743	73.2847	0.231585	0.818892
Q9Y5A9	YTHDF2	YTH domain-containing family protein 2	1.22233	0.151896	116.324	88.23	78.4063	113.861	79.967	67.7562	105.766	81.7115	70.6024	0.289638	0.818453
Q9NUD5	ZCCHC3	Zinc finger CCHC domain-containing protein 3	0.848487	0.152001	100.977	85.4418	87.7073	95.0193	92.0226	84.9024	129.457	120.719	116.727	-0.237036	0.818154
Q9NVU7	SDAD1	Protein SDA1 homolog	1.0795	0.152192	109.096	100.318	95.3024	112.045	92.2157	95.9776	95.8811	107.649	90.8652	0.110358	0.817608
P08581	MET	Hepatocyte growth factor receptor	1.27885	0.152203	99.3947	88.9919	74.8302	136.473	68.6234	60.7558	91.5271	92.4013	77.3653	0.354848	0.817578
O95155	UBE4B	Ubiquitin conjugation factor E4 B	1.04881	0.152282	110.061	112.339	109.854	109.846	99.397	99.6041	104.263	112.753	110.89	0.0687546	0.817351
Q9NXV2	KCTD5	BTB/POZ domain-containing protein KCTD5	1.08633	0.152602	96.314	108.825	106.343	110.918	98.5977	105.25	82.5123	101.179	98.4984	0.119467	0.816441
Q96S38	RPS6KC1	Ribosomal protein S6 kinase delta-1	1.21005	0.152872	144.441	117.277	106.585	100.806	88.803	87.712	130.041	91.4212	86.6211	0.275063	0.815672
Q96KP4	CNDP2	Cytosolic non-specific dipeptidase	0.913167	0.152898	88.5508	91.8666	91.9641	99.9386	110.884	114.589	92.6467	94.9873	96.5477	-0.131049	0.815598
A0A7P0T954	CUL4B	Cullin-4B	1.1084	0.15364	122.39	108.733	102.94	104.993	91.9734	84.3176	111.837	103.664	103.354	0.148479	0.813495
O43278	SPINT1	Kunitz-type protease inhibitor 1	1.26771	0.153758	105.7	135.3	109.8		78.7	71.2	130	89.3	92	0.342222	0.813162
Q9P275	USP36	Ubiquitin carboxyl-terminal hydrolase 36	0.925123	0.153984	107.576	100.021	101.936	89.8892	117.046	113.109	108.64	97.9994	102.894	-0.112282	0.812525
A5D8W1	CFAP69	Cilia- and flagella-associated protein 69	0.859341	0.15422	89.7	87	99.2		119.1	121.4	84.3	104.3	106	-0.218697	0.811859
Q9UNI6	DUSP12	Dual specificity protein phosphatase 12	1.34994	0.154316	125.304	90.9409	79.3997	124.661	63.2594	63.3462	125.304	72.4576	64.8214	0.432895	0.811588
Q9Y5B9	SUPT16H	FACT complex subunit SPT16	0.840739	0.15432	78.398	79.6201	82.8162	95.0182	122.579	116.657	80.8421	89.1143	90.1484	-0.25027	0.811579
Q92485	SMPDL3B	Acid sphingomyelinase-like phosphodiesterase 3b	0.801097	0.155136	91.4565	96.7818	111.947	68.9242	129.776	120.862	73.0494	124.798	127.46	-0.319951	0.809287
Q9P2I0	CPSF2	Cleavage and polyadenylation specificity factor subunit 2	0.891	0.155204	92.388	103.177	109.357	96.549	107.157	114.49	92.388	120.88	128.317	-0.166503	0.809097
Q96P48	ARAP1	Arf-GAP with Rho-GAP domain, ANK repeat and PH domain-containing protein 1	1.10898	0.155218	110.683	100.914	97.0064	104.984	102.184	100.719	98.9602	74.5376	89.7773	0.149239	0.809058
Q92845	KIFAP3	Kinesin-associated protein 3	0.877202	0.155318	87.3926	102.442	99.7438	91.9413	120.813	124.758	87.185	99.9513	110.953	-0.18902	0.808778
Q9H9J2	MRPL44	39S ribosomal protein L44, mitochondrial	0.899361	0.155333	109.985	94.3335	96.1313	82.9654	113.369	118.446	105.015	99.0924	96.9773	-0.153027	0.808736
D6REX3	SEC31A	Protein transport protein Sec31A	1.18804	0.155685	137.842	119.63	115.05	105.91	80.8077	76.5546	119.085	110.361	116.577	0.24858	0.807753
Q9NUP9	LIN7C	Protein lin-7 homolog C	1.18618	0.155895	99.6243	94.5268	86.8359	124.916	90.1448	84.4213	106.063	70.8281	76.2833	0.246328	0.807169
Q96EX3	DYNC2I2	Cytoplasmic dynein 2 intermediate chain 2	0.853112	0.156114	93.8502	89.8294	88.2604	81.7837	121.799	124.251	98.8516	86.0048	87.3777	-0.229193	0.806558
Q9Y696	CLIC4	Chloride intracellular channel protein 4	1.17078	0.156195	110.53	128.623	130.926	103.9	91.3409	93.3147	81.1432	124.018	116.232	0.227475	0.806333
P23284	PPIB	Peptidyl-prolyl cis-trans isomerase B	1.12044	0.156269	107.865	88.7484	87.8249	103.211	91.7036	82.6533	100.477	80.4369	77.2046	0.164061	0.806126
Q96CS2	HAUS1	HAUS augmin-like complex subunit 1	1.42185	0.15627	136.648	119.061	94.5571	117.723	76.3768	65.5082	153.347	57.7026	58.493	0.507767	0.806125
Q9BSQ5	CCM2	Cerebral cavernous malformations 2 protein	1.32711	0.156287	107.967	89.9131	90.0016	147.701	63.7179	51.6823	107.79	89.3821	97.7008	0.408289	0.806077
Q9Y6J9	TAF6L	TAF6-like RNA polymerase II p300/CBP-associated factor-associated factor 65 kDa subunit 6L	1.18438	0.156513	112.231	96.2923	92.0483	123.087	77.5243	70.3566	91.0108	111.854	96.3866	0.244128	0.805448
A0A0C4DGV4	LAMTOR5	Ragulator complex protein LAMTOR5	1.24182	0.156523	118.062	91.2425	92.274	116.434	73.5191	66.111	121.907	78.9581	80.2709	0.312455	0.805421
Q8N511	TMEM199	Transmembrane protein 199	1.18498	0.156545	127.8	97.5	89.1		93.2	85.3	101.4	83.7	78.6	0.244868	0.805362
Q13111	CHAF1A	Chromatin assembly factor 1 subunit A	1.03025	0.156558	102.339	100.328	106.963	102.578	96.9103	100.429	97.614	101.133	104.048	0.0429878	0.805325
Q32MZ4	LRRFIP1	Leucine-rich repeat flightless-interacting protein 1	1.11163	0.156823	91.2568	100.467	101.407	104.453	81.2947	73.5881	99.9971	95.204	96.9897	0.152675	0.804591
A7MBM2	DISP2	Protein dispatched homolog 2	0.699331	0.157553	48.1	95.6	100.8		99.3	97.5	93.5	128	164.4	-0.515953	0.802572
Q92793	CREBBP	CREB-binding protein	1.1068	0.15793	87.785	101.744	101.463	120.211	96.9664	96.2169	86.8481	89.3777	94.9989	0.146389	0.801536
Q5SY16	NOL9	Polynucleotide 5'-hydroxyl-kinase NOL9	0.868293	0.158024	101.747	100.188	93.1208	89.2277	115.777	127.521	125.547	93.4326	90.9383	-0.203745	0.801276
Q8N335	GPD1L	Glycerol-3-phosphate dehydrogenase 1-like protein	0.878558	0.158242	105.2	83.9227	83.1309	87.0106	117.868	108.565	106.19	89.8606	88.673	-0.18679	0.800678
E9PGC8	MAP1A	Microtubule-associated protein 1A	0.631044	0.158371	71.3	74	57		153.8	144	99.4	68.4	68.7	-0.664188	0.800324
Q9H8Y8	GORASP2	Golgi reassembly-stacking protein 2	1.08933	0.158501	88.6906	93.6434	93.3682	112.349	88.9658	85.8474	94.744	84.6551	91.0753	0.123437	0.799969
Q86SF2	GALNT7	N-acetylgalactosaminyltransferase 7	1.05735	0.158643	110.002	104.536	101.555	98.5459	94.2021	92.314	95.8913	102.251	105.53	0.0804489	0.799578
P49840	GSK3A	Glycogen synthase kinase-3 alpha	1.21864	0.15883	123.472	96.3065	84.4953	119.65	103.393	96.1248	98.8504	71.1396	65.3249	0.285272	0.799069
Q8IUE6	H2AC21	Histone H2A type 2-B	1.28454	0.159013	114.891	111.943	97.4775	116.327	77.9452	69.6531	138.016	66.5206	76.6553	0.361248	0.798566
Q6ICG6	KIAA0930	Uncharacterized protein KIAA0930	1.35019	0.159027	138.779	89.5202	88.4296	115.505	55.8933	50.713	119.875	92.7011	80.9771	0.433165	0.798529
Q96DX7	TRIM44	Tripartite motif-containing protein 44	1.17451	0.159108	113.3	103.7	110.9		84.1	70.2	109	93.4	108.6	0.23206	0.798307
Q9BV57	ADI1	Acireductone dioxygenase	1.10041	0.159157	94.1394	97.7934	98.4665	117.704	99.5243	98.8512	83.9466	86.4467	94.8125	0.13804	0.798174
Q5JVF3	PCID2	PCI domain-containing protein 2	0.937916	0.1593	107.269	104.797	98.5627	91.7279	106.624	102.325	116.405	102.432	108.451	-0.0924694	0.797783
E7EPT4	NDUFV2	NADH dehydrogenase [ubiquinone] flavoprotein 2, mitochondrial	0.852827	0.159489	87.9571	83.9683	92.355	92.1497	94.0936	87.3434	90.8208	124.879	125.288	-0.229675	0.797269
P60903	S100A10	Protein S100-A10	1.45958	0.159581	194.325	136.61	113.919	96.1888	73.8902	66.3267	160.464	84.7119	77.9629	0.545551	0.797018
O43572	AKAP10	A-kinase anchor protein 10, mitochondrial	0.80832	0.159784	99.3944	114.878	121.121	74.3934	107.885	111.631	112.505	135.606	166.074	-0.307002	0.796467
Q8IV48	ERI1	3'-5' exoribonuclease 1	0.929737	0.160216	101.059	92.031	87.8566	90.4832	97.4675	104.263	109.991	96.2054	91.4486	-0.105105	0.795295
P62249	RPS16	40S ribosomal protein S16	1.21975	0.160323	128.513	87.7023	84.7543	112.636	71.3963	69.0011	102.811	95.9935	84.6622	0.286583	0.795004
Q99807	COQ7	5-demethoxyubiquinone hydroxylase, mitochondrial	0.9299	0.160549	102.5	90.5	93		103.9	106.8	91.9	105.8	104.2	-0.104853	0.794393
A0A0G2JMZ8	OCLN	Occludin	0.721086	0.160667	77.0493	104.723	111.498	71.9139	112.761	107.708	78.6569	149.505	184.413	-0.471757	0.794073
A0A7I2PJZ2	MAPT	Microtubule-associated protein	1.14291	0.16069	111.5	108.895	105.589	100.95	88.5588	75.9362	120.115	88.7592	93.5678	0.192714	0.794012
A0A7P0TAE9	CANX	Calnexin	0.931963	0.160761	97.6138	101.313	100.285	93.7125	117.548	110.047	97.9221	97.4083	104.087	-0.101655	0.793819
P48426	PIP4K2A	Phosphatidylinositol 5-phosphate 4-kinase type-2 alpha	1.12641	0.160795	105.468	111.744	117.3	108.977	96.4128	100.734	76.8627	119.153	98.9851	0.171735	0.793729
O00264	PGRMC1	Membrane-associated progesterone receptor component 1	1.18576	0.161554	109.601	99.8065	97.1014	131.483	82.2704	73.3158	117.063	89.3595	99.7132	0.245807	0.791681
O14763	TNFRSF10B	Tumor necrosis factor receptor superfamily member 10B	1.23232	0.161832	83.3	120.3	129.2		81.5	81.1	78	107.8	101.7	0.301375	0.790935
A0A087WW63	CACNA1A	Voltage-dependent P/Q-type calcium channel subunit alpha	1.1745	0.162105	127.1	110.3	98.6		92.6	92.8	120	87.7	83.7	0.232043	0.790203
G3XAA4	JADE2	E3 ubiquitin-protein ligase Jade-2	0.812496	0.162331	81.3	88	90		132	125.9	89.4	91.7	92.9	-0.299567	0.789599
Q9NR50	EIF2B3	Translation initiation factor eIF-2B subunit gamma	1.19535	0.162547	98.434	93.7255	88.0398	127.757	92.2153	88.484	104.209	70.0054	71.6934	0.257437	0.789021
A0A2R8YEZ0	ABHD18	Protein ABHD18	1.32259	0.16272	107.2	114.8	132.4		76.1	62.4	71	104.2	132.9	0.403361	0.788559
Q8WV60	PTCD2	Pentatricopeptide repeat-containing protein 2, mitochondrial	0.813733	0.163132	85.9	87.4	92.4		127.8	135.9	91.2	95.7	93.6	-0.297373	0.787461
O00562	PITPNM1	Membrane-associated phosphatidylinositol transfer protein 1	1.40585	0.163141	149.8	121.9	108.3		61.4	46.2	133.5	104	105.4	0.491438	0.787438
A0A024R4E5	HDLBP	High density lipoprotein binding protein (Vigilin), isoform CRA_a	1.04878	0.163366	99.6414	104.329	105.027	105.58	104.13	104.229	98.5442	90.8642	96.3499	0.0687159	0.786838
A0A140T9G8	C6orf136	Uncharacterized protein C6orf136 (Fragment)	1.19547	0.163377	115.2	115.5	90.5		76.1	71.4	104	91.5	104.8	0.257583	0.786809
Q7Z794	KRT77	Keratin, type II cytoskeletal 1b	0.714342	0.164214	134.109	117.407	100.216	75.5701	222.012	181.17	113.749	118.382	112.408	-0.485314	0.784589
Q9Y2W6	TDRKH	Tudor and KH domain-containing protein	0.911115	0.164466	81.2373	78.7267	80.251	100.555	101.233	90.1142	92.8042	86.7069	96.6598	-0.134295	0.783924
O94832	MYO1D	Unconventional myosin-Id	0.872909	0.16515	120.374	112.182	113.963	73.9474	119.899	124.766	109.096	126.309	122.036	-0.196096	0.782121
Q9H9T3	ELP3	Elongator complex protein 3	0.92027	0.165295	98.9628	92.3183	101.882	94.4736	111.95	106.312	87.788	110.641	109.836	-0.119871	0.781741
Q13572	ITPK1	Inositol-tetrakisphosphate 1-kinase	0.867827	0.165606	91.3357	86.164	88.1156	92.9002	115.048	127.831	90.5551	92.0188	90.9454	-0.204521	0.780923
P55884	EIF3B	Eukaryotic translation initiation factor 3 subunit B	0.938085	0.16569	98.2419	100.721	103.201	95.9334	106.093	107.126	93.0767	110.019	114.151	-0.0922095	0.780704
Q5T4S7	UBR4	E3 ubiquitin-protein ligase UBR4	1.08985	0.166214	105.092	102.652	100.603	113.546	91.2358	89.6745	87.8206	108.214	106.946	0.124125	0.779333
Q8TE04	PANK1	Pantothenate kinase 1	0.802077	0.166684	91.4	78.7	72.4		129	108.2	102.1	88.8	75.8	-0.318187	0.778105
Q9BRT6	LLPH	Protein LLP homolog	1.06232	0.166961	97.8634	101.711	102.895	113.462	101.81	103.487	92.8321	99.3432	91.9443	0.0872117	0.777384
P04049	RAF1	RAF proto-oncogene serine/threonine-protein kinase	1.20966	0.166993	131.2	102.6	92.3		80.6	74.6	111.8	91.2	91.1	0.274601	0.777301
Q6L8Q7	PDE12	2',5'-phosphodiesterase 12	0.864855	0.167227	93.5286	88.4894	91.7145	87.1288	121.345	121.95	79.3179	100.785	98.1647	-0.20947	0.776695
Q9UKV8	AGO2	Protein argonaute-2	1.0985	0.167304	113.233	111.402	102.652	101.863	95.7341	99.9053	114.25	95.4289	83.017	0.135537	0.776493
Q86U70	LDB1	LIM domain-binding protein 1	1.1927	0.167539	155.349	127.083	123.812	90.1542	94.2607	96.1295	122.527	103.488	103.839	0.254236	0.775883
Q5T760	SRSF11	Serine/arginine-rich-splicing factor 11	1.13144	0.16798	97.9111	88.12	83.5679	103.946	77.0405	85.1139	101.175	76.9547	72.4027	0.178165	0.774742
A0A6Q8PGB2	LRSAM1	E3 ubiquitin-protein ligase LRSAM1	1.07856	0.168075	108.642	94.6361	91.2292	106.752	97.1913	92.2702	99.2733	91.4185	84.8886	0.109102	0.774498
O94915	FRYL	Protein furry homolog-like	1.20869	0.168181	133.2	117	102.4		95.5	87.2	130.1	88.5	84.9	0.273448	0.774223
Q96LX8	ZNF597	Zinc finger protein 597	1.34866	0.168625	90.4	130.2	119.1		57.3	52.7	94.5	116.9	98.4	0.431525	0.773078
C9JYA1	NUP42	Nucleoporin NUP42 (Fragment)	1.04052	0.168916	99.9	101.1	94.3		94.4	99.4	95.3	93.3	90.6	0.0573068	0.772329
Q8N461	FBXL16	F-box/LRR-repeat protein 16	0.856686	0.169101	87.4636	87.9769	97.832	99.5428	108.611	102.862	79.9697	124.009	128.526	-0.223161	0.771853
Q8IV08	PLD3	5'-3' exonuclease PLD3	1.18464	0.16911	130.036	97.9202	88.0005	112.859	98.7059	91.6344	108.036	84.1701	69.929	0.244446	0.771832
Q8N1G4	LRRC47	Leucine-rich repeat-containing protein 47	1.07784	0.169668	94.469	94.469	95.1257	108.99	97.002	93.6247	96.8143	81.8044	86.5888	0.108145	0.770401
Q9UFW8	CGGBP1	CGG triplet repeat-binding protein 1	1.26442	0.169699	91.6178	94.3967	79.2393	137.047	78.4815	78.2288	106.438	69.0502	65.5135	0.338478	0.77032
Q96CW5	TUBGCP3	Gamma-tubulin complex component 3	1.145	0.169797	98.1429	88.478	82.4155	121.143	86.4572	86.2814	94.0134	78.5495	80.6582	0.195347	0.770071
F2Z2U4	TRRAP	Transformation/transcription domain-associated protein	1.32333	0.170073	97.9385	88.4471	83.9113	169.16	83.5753	83.0714	82.7354	83.9953	81.7274	0.404174	0.769365
Q5BKZ1	ZNF326	DBIRD complex subunit ZNF326	1.2709	0.170172	108.705	101.434	92.3214	115.019	69.126	63.5112	130.52	71.5191	75.9373	0.345853	0.769113
Q13232	NME3	Nucleoside diphosphate kinase 3	1.08656	0.170527	114.733	98.05	96.5865	102.363	100.879	102.44	97.5622	86.8303	85.9523	0.11977	0.768207
Q9NQR1	KMT5A	N-lysine methyltransferase KMT5A	0.816688	0.17133	85.7672	71.9645	83.673	97.1127	128.127	124.415	101.95	89.2893	74.3443	-0.292143	0.766167
J3QRU1	YES1	Tyrosine-protein kinase	1.14128	0.171445	123.78	102.908	105.919	111.013	82.8664	80.478	95.8468	112.877	113.812	0.190656	0.765876
O95057	DIRAS1	GTP-binding protein Di-Ras1	1.07676	0.171651	109.591	104.421	104.218	107.851	102.495	107.26	86.274	107.158	91.4444	0.106703	0.765353
O95202	LETM1	Mitochondrial proton/calcium exchanger protein	1.14827	0.171898	109.459	109.556	95.8491	109.751	92.544	86.517	120.929	84.0867	78.1569	0.199458	0.764729
P10109	FDX1	Adrenodoxin, mitochondrial	1.08406	0.171954	115.335	115.783	121.954	101.314	103.666	104.34	91.5496	113.988	110.398	0.116439	0.764588
O60504	SORBS3	Vinexin	0.813196	0.171954	74.5407	74.8089	71.3231	89.9962	116.637	104.84	112.258	72.3957	71.4125	-0.298326	0.764587
O75489	NDUFS3	NADH dehydrogenase [ubiquinone] iron-sulfur protein 3, mitochondrial	0.940936	0.172148	89.2397	95.4074	91.649	95.7056	102.153	104.563	105.045	90.2998	92.1308	-0.0878321	0.764097
Q99614	TTC1	Tetratricopeptide repeat protein 1	0.707395	0.172232	65.7103	66.8336	72.8243	81.1588	146.397	138.628	79.8446	70.765	70.6714	-0.499412	0.763886
Q7Z333	SETX	Probable helicase senataxin	0.927458	0.172358	90.0395	99.6411	97.7796	93.023	97.0938	99.4452	93.3707	115.513	107.381	-0.108647	0.763568
Q00796	SORD	Sorbitol dehydrogenase	0.941477	0.172648	105.519	102.179	101.24	87.2578	108.337	106.563	98.6304	107.502	104.997	-0.0870017	0.762839
Q9NUQ9	CYRIB	CYFIP-related Rac1 interactor B	1.11926	0.172772	117.924	102.304	104.269	97.5842	88.3394	80.0641	88.6497	110.579	103.752	0.162544	0.762526
P16403	H1-2	Histone H1.2	1.42666	0.17289	87.4277	181.596	156.444	102.27	55.5352	55.5352	112.177	119.018	120.125	0.512639	0.76223
Q9UHA3	RSL24D1	Probable ribosome biogenesis protein RLP24	0.750357	0.173096	82.4136	83.4162	87.9279	71.3592	142.971	148.986	88.9305	79.5061	81.2105	-0.414351	0.761714
P51812	RPS6KA3	Ribosomal protein S6 kinase alpha-3	0.889353	0.173137	108.325	104.241	109.686	84.4091	107.304	97.8892	111.728	125.793	128.855	-0.169172	0.76161
Q969U7	PSMG2	Proteasome assembly chaperone 2	0.913549	0.173437	100.777	94.8553	99.45	90.9378	108.639	112.621	86.2785	114.051	106.597	-0.130445	0.760858
Q5SQN1	SNAP47	Synaptosomal-associated protein 47	0.913061	0.173553	98.534	104.471	101.659	92.7151	119.366	122.907	97.2841	102.804	101.659	-0.131217	0.760567
P21397	MAOA	Amine oxidase [flavin-containing] A	1.29001	0.173593	113.582	159.471	163.352	112.102	81.2765	86.185	82.418	147.599	134.015	0.367385	0.760467
P42285	MTREX	Exosome RNA helicase MTR4	0.914322	0.174121	95.8241	104.676	105.087	94.7084	110.131	113.116	90.0602	116.1	117.85	-0.129226	0.759149
Q9BT22	ALG1	Chitobiosyldiphosphodolichol beta-mannosyltransferase	0.9556	0.174521	110.896	103.396	98.5745	101.849	106.075	107.039	115.611	104.36	109.396	-0.0655216	0.758152
O43290	SART1	U4/U6.U5 tri-snRNP-associated protein 1	0.775579	0.174842	78.5214	79.5734	79.0952	81.535	136.002	132.846	94.9716	73.6437	76.226	-0.366654	0.757354
Q9Y450	HBS1L	HBS1-like protein	0.942254	0.17588	105.757	104.375	106.289	91.3931	112.347	108.414	100.655	105.438	114.154	-0.0858123	0.754783
Q9Y6Y8	SEC23IP	SEC23-interacting protein	0.879465	0.17607	86.8876	86.5006	84.6622	95.7374	117.269	115.431	98.2081	87.3714	84.5654	-0.185301	0.754314
P20936	RASA1	Ras GTPase-activating protein 1	0.793166	0.176288	74.0665	73.5899	83.0269	99.6912	126.113	129.926	65.4874	105.047	94.0845	-0.334305	0.753778
Q5T9B7	AK1	Adenylate kinase isoenzyme 1	1.29741	0.176331	132.374	158.211	147.121	97.9133	74.2095	75.8612	87.6592	138.037	140.278	0.37564	0.753672
Q15596	NCOA2	Nuclear receptor coactivator 2	1.36428	0.176396	101.602	100.584	89.0502	141.311	72.2579	70.4768	135.865	60.9782	56.7377	0.448137	0.753512
Q96QZ7	MAGI1	Membrane-associated guanylate kinase, WW and PDZ domain-containing protein 1	1.13327	0.176401	102.155	124.539	109.888	101.958	87.8084	79.0581	116.501	99.8146	100.527	0.180496	0.7535
O75323	NIPSNAP2	Protein NipSnap homolog 2	0.908539	0.176413	96.899	98.402	98.8029	93.5115	117.541	121.65	94.2936	104.915	94.8948	-0.13838	0.753469
Q9H5V9	STEEP1	STING ER exit protein	0.840324	0.176442	99.5912	105.634	108.543	64.3173	132.714	122.083	92.3177	105.746	109.55	-0.250983	0.753398
A8MXP9	MATR3	Matrin-3	0.942333	0.176492	93.0022	94.305	94.6057	90.7041	100.919	97.2114	109.638	97.0109	89.4946	-0.0856913	0.753274
Q6PEV8	FAM199X	Protein FAM199X	0.936358	0.176671	87.1	89.3	84.9		90.6	84.9	91.1	97.6	100.9	-0.0948682	0.752835
Q01970	PLCB3	1-phosphatidylinositol 4,5-bisphosphate phosphodiesterase beta-3	1.04174	0.176732	100.721	103.922	102.822	103.482	103.422	104.022	95.1202	98.7209	91.8195	0.0589893	0.752684
P62258	YWHAE	14-3-3 protein epsilon	1.11755	0.177254	119.272	114.402	123.385	103.443	93.4047	93.7294	91.3483	116.134	120.463	0.160344	0.751404
P49755	TMED10	Transmembrane emp24 domain-containing protein 10	0.845435	0.177283	88.123	87.7274	93.0682	84.9463	126.596	128.772	89.2109	90.2	88.4197	-0.242234	0.751334
A0A0C4DH75	MPP2	MAGUK p55 subfamily member 2	1.08492	0.177549	93.9848	94.3545	91.4896	104.616	82.9876	78.7365	100.084	87.2386	93.8924	0.117595	0.750681
Q9NRX4	PHPT1	14 kDa phosphohistidine phosphatase	0.855016	0.17772	83.6976	83.4036	81.2474	73.5667	104.181	98.6926	115.452	75.8571	76.4451	-0.225976	0.750264
Q02543	RPL18A	60S ribosomal protein L18a	1.1342	0.177746	119.097	94.3967	91.2374	107.196	82.3339	79.4618	108.757	94.4925	88.9397	0.181673	0.750199
O15151	MDM4	Protein Mdm4	0.938313	0.177846	93.6	94.7	100.4		103.7	97.7	96.5	102.1	112.8	-0.0918596	0.749955
Q9HCN3	PGAP6	Post-GPI attachment to proteins factor 6	0.804619	0.177878	95.1	89.8	81.3		93.4	101.3	151.1	103.9	101.7	-0.313623	0.749878
Q71U36	TUBA1A	Tubulin alpha-1A chain	0.925698	0.178308	94.4589	100.471	99.8594	90.5146	112.495	114.329	92.4209	98.1272	102.916	-0.111386	0.74883
Q96A35	MRPL24	39S ribosomal protein L24, mitochondrial	0.459117	0.178727	51.9583	35.4105	41.9267	59.7804	186.398	175.852	74.3364	40.2119	37.9827	-1.12307	0.74781
B0QZ18	CPNE1	Copine-1	1.05253	0.179359	103.706	104.815	100.074	105.677	90.6921	94.0212	105.723	104.311	97.2494	0.0738581	0.746278
Q12891	HYAL2	Hyaluronidase-2	0.773772	0.179409	132.107	139.829	132.248	64.4029	145.866	111.891	135.196	162.993	201.039	-0.37002	0.746156
Q96CT7	CCDC124	Coiled-coil domain-containing protein 124	0.847804	0.179615	83.1159	88.53	93.9441	90.6671	125.225	128.133	80.2084	95.2474	96.4506	-0.238198	0.745656
O60645	EXOC3	Exocyst complex component 3	1.25	0.179802	146.338	118.379	116.691	105.403	77.8641	57.2903	121.755	119.539	110.36	0.321933	0.745206
Q9NW81	DMAC2	Distal membrane-arm assembly complex protein 2	1.47191	0.179852	85.2777	81.419	76.7885	180.356	71.4635	58.9612	92.4549	63.1287	73.9331	0.55769	0.745086
E5KLJ9	OPA1	Dynamin-like 120 kDa protein, mitochondrial	0.909506	0.179893	90.5489	94.4168	89.9538	98.0132	113.955	116.037	98.4831	94.4168	89.6563	-0.136845	0.744986
O75695	RP2	Protein XRP2	1.08217	0.180085	89.8212	115.555	101.653	108.836	92.5819	94.2581	95.4412	94.5539	103.526	0.113923	0.744522
Q99250	SCN2A	Sodium channel protein type 2 subunit alpha	0.70621	0.18066	74.4	84.4	72.3		140.7	151.7	70.2	91.3	91.5	-0.501832	0.743138
Q8IWA0	WDR75	WD repeat-containing protein 75	0.895718	0.181053	95.8259	96.8293	96.1269	98.2661	119.005	125.527	87.6982	106.964	100.943	-0.158884	0.742194
E9PFK9	RABGEF1	Rab5 GDP/GTP exchange factor	1.19134	0.181065	122.174	113.862	91.9309	113.266	98.7406	75.4074	126.08	83.2185	79.5132	0.252583	0.742165
Q9H223	EHD4	EH domain-containing protein 4	0.957859	0.181363	98.611	101.028	99.9204	100.877	104.453	100.323	98.4095	113.216	106.165	-0.0621145	0.741451
Q9Y5Z4	HEBP2	Heme-binding protein 2	1.1645	0.181554	98.5109	91.8046	88.3608	116.444	95.7015	97.4234	94.2515	68.7855	67.9698	0.219707	0.740993
Q5R3I4	TTC38	Tetratricopeptide repeat protein 38	1.12771	0.181613	79.1434	94.0927	91.8454	110.433	90.6729	78.3617	73.574	79.5342	94.0927	0.173398	0.740854
Q8WV74	NUDT8	Mitochondrial coenzyme A diphosphatase NUDT8	0.818253	0.182027	81.4	81	87.2		88.4	77.6	97.5	118.8	126.1	-0.289381	0.739863
Q6FIF0	ZFAND6	AN1-type zinc finger protein 6	0.639271	0.182038	73.4706	84.0261	73.4706	60.1116	158.855	185.192	74.0977	71.7984	79.2187	-0.645501	0.739837
Q562E7	WDR81	WD repeat-containing protein 81	1.23099	0.182399	99.7699	102.351	91.5818	133.752	82.4147	75.8287	124.69	75.9177	75.2057	0.299816	0.738977
A0A087X1N8	SERPINB6	Serpin B6	1.05518	0.182472	97.9128	99.0901	97.3241	110.735	98.8939	98.3052	88.2	96.7355	97.7166	0.0774834	0.738803
Q9Y4P3	TBL2	Transducin beta-like protein 2	1.25466	0.182618	149.04	107.578	98.2057	101.632	77.7292	65.4026	127.036	94.4364	90.1577	0.327295	0.738456
O60784	TOM1	Target of Myb1 membrane trafficking protein	1.03767	0.182698	102.305	106.352	103.418	104.997	95.6261	102.912	95.6261	106.656	101.596	0.0533414	0.738265
A0A8Q3SIN4	RGPD6	RANBP2-like and GRIP domain-containing protein 5/6	0.343972	0.182738	53.2	36.9	36		202.2	224.6	111.1	37.7	35.4	-1.53964	0.73817
Q9BYG5	PARD6B	Partitioning defective 6 homolog beta	0.830475	0.183066	101.44	91.7892	86.2449	94.1312	136.144	142.817	93.3293	92.3025	97.7442	-0.267991	0.737393
O00425	IGF2BP3	Insulin-like growth factor 2 mRNA-binding protein 3	1.17308	0.183372	115.363	92.0344	85.6304	113.584	89.8387	83.1603	111.246	75.9329	73.0969	0.230297	0.736667
P14866	HNRNPL	Heterogeneous nuclear ribonucleoprotein L	1.06932	0.18385	102.221	113.521	113.417	102.568	91.5423	94.1341	104.398	107.404	107.197	0.0966895	0.735537
Q9NVH2	INTS7	Integrator complex subunit 7	0.826459	0.183904	93.2215	103.09	90.3871	80.1272	139.937	135.003	97.6306	89.7572	92.4866	-0.274985	0.735408
H0YNJ6	GMPR2	GMP reductase	1.35912	0.184387	172.1	99.5327	88.7048	110.471	72.0466	67.9862	128.58	96.3051	68.0903	0.442672	0.734271
Q7L3T8	PARS2	Probable proline--tRNA ligase, mitochondrial	0.757294	0.18448	82.1144	84.7469	88.3919	69.3649	146.814	141.346	85.6581	74.7231	87.2781	-0.401074	0.73405
Q92547	TOPBP1	DNA topoisomerase 2-binding protein 1	1.11552	0.184636	85.388	98.5736	85.9336	109.976	91.8444	82.2962	91.026	88.8435	71.6568	0.157715	0.733683
Q9BVJ7	DUSP23	Dual specificity protein phosphatase 23	1.14065	0.185025	101.883	134.96	121.284	92.6949	93.8253	85.874	104.957	103.155	106.229	0.189854	0.73277
M0QXB4	COPE	Coatomer subunit epsilon	1.09078	0.18517	119.985	118.127	116.597	102.049	93.5399	95.0697	119.22	107.09	108.511	0.125359	0.73243
Q7Z6Z7	HUWE1	E3 ubiquitin-protein ligase HUWE1	1.10688	0.185231	113.757	120.847	120.741	104.929	95.6615	89.5239	98.4128	115.662	120.529	0.146493	0.732286
Q8N1B4	VPS52	Vacuolar protein sorting-associated protein 52 homolog	1.18464	0.185275	146.019	124.542	114.8	105.226	88.5635	77.7145	130.631	109.819	110.926	0.244453	0.732183
Q9Y2H6	FNDC3A	Fibronectin type-III domain-containing protein 3A	1.50269	0.185621	87.5176	74.2324	71.9056	183.482	67.0268	61.6226	81.4379	74.3825	62.5233	0.587545	0.731373
P55011	SLC12A2	Solute carrier family 12 member 2	1.0969	0.185697	86.1915	105.067	96.1107	116.581	96.8811	94.6662	85.8063	90.3325	92.6438	0.133437	0.731194
P04350	TUBB4A	Tubulin beta-4A chain	1.07911	0.186289	117.828	110.294	105.166	98.2521	101.818	99.5156	110.817	98.9924	88.7374	0.109841	0.729812
P48723	HSPA13	Heat shock 70 kDa protein 13	1.11341	0.186376	101.429	102.86	93.7958	112.423	103.433	102.479	97.3262	79.1968	78.4335	0.154984	0.72961
Q96P11	NSUN5	28S rRNA (cytosine-C(5))-methyltransferase	1.13759	0.186453	102.671	109.034	98.1402	115.231	81.655	90.5242	117.518	100.068	77.3168	0.185975	0.729431
Q8WUY1	THEM6	Protein THEM6	1.32132	0.186652	140.5	112.6	96.6		69.4	61.1	132.7	91.4	86.5	0.401978	0.728967
Q99584	S100A13	Protein S100-A13	1.09248	0.186738	91.9534	105.439	99.3801	104.543	104.071	99.5755	90.4876	85.9926	79.0545	0.127602	0.728767
H7C2N1	PTMA	Prothymosin alpha (Fragment)	0.828926	0.186831	78.0125	53.7503	59.9092	86.7349	91.5434	79.8789	100.129	85.5712	62.7086	-0.270685	0.728551
Q9Y624	F11R	Junctional adhesion molecule A	1.07309	0.186937	104.547	118.431	118.746	96.7375	101.708	107.598	100.656	103.075	97.7108	0.101773	0.728304
P21399	ACO1	Cytoplasmic aconitate hydratase	0.941959	0.187241	111.425	97.2607	96.841	89.794	105.444	107.228	102.087	107.123	102.717	-0.0862645	0.727599
Q9UKY7	CDV3	Protein CDV3 homolog	0.41868	0.187688	41.9984	34.4039	38.2469	27.6768	195.352	99.9178	49.5014	38.5214	41.6324	-1.25608	0.726563
Q92900	UPF1	Regulator of nonsense transcripts 1	0.946147	0.188342	90.5702	91.341	90.6665	98.1254	106.564	102.999	94.5206	92.8826	92.7863	-0.0798631	0.725053
Q6NS38	ALKBH2	DNA oxidative demethylase ALKBH2	0.732142	0.188391	96.9328	105.373	118.404	76.7869	106.738	116.791	84.5214	181.33	189.273	-0.449805	0.724939
Q14353	GAMT	Guanidinoacetate N-methyltransferase	1.14498	0.188461	98.7106	88.5864	86.23	113.085	87.3646	90.9429	100.718	71.7419	71.3055	0.195324	0.724778
Q9GZT4	SRR	Serine racemase	0.732055	0.188592	85.4794	109.454	125.269	74.4741	119.37	118.742	77.9482	192.297	165.561	-0.449976	0.724478
Q9NPL8	TIMMDC1	Complex I assembly factor TIMMDC1, mitochondrial	1.16376	0.188786	94.7086	86.6975	81.5348	121.331	88.4777	81.9799	94.9756	78.8645	68.4501	0.218796	0.724029
Q8N9B5	JMY	Junction-mediating and -regulatory protein	1.12691	0.188998	95.2	118.3	119.3		91.4	101.5	84.2	107	108.1	0.172376	0.723543
O95169	NDUFB8	NADH dehydrogenase [ubiquinone] 1 beta subcomplex subunit 8, mitochondrial	0.793431	0.189622	120.772	127.775	110.201	59.6073	114.165	96.1947	144.821	156.977	146.935	-0.333823	0.72211
Q9NVM9	INTS13	Integrator complex subunit 13	0.794817	0.190009	110.44	125.386	135.041	65.2769	115.599	114.011	122.476	168.372	165.462	-0.331306	0.721225
Q9NZ32	ACTR10	Actin-related protein 10	1.13993	0.190583	102.458	92.7129	91.7111	125.397	94.2612	89.5253	106.283	82.7859	79.234	0.188941	0.719917
O60869	EDF1	Endothelial differentiation-related factor 1	1.55287	0.190654	91.0796	232.336	198.806	68.0382	77.5247	88.7015	87.7503	121.638	99.5217	0.634938	0.719754
P26038	MSN	Moesin	1.13586	0.19094	122.931	93.1326	94.116	107.51	101.197	103.065	96.673	82.8064	75.9222	0.183779	0.719104
Q8TC59	PIWIL2	Piwi-like protein 2	1.12006	0.191322	107.8	118.1	112		81.6	96.7	98.5	110.3	115.7	0.163577	0.718235
Q9Y6R0	NUMBL	Numb-like protein	1.26042	0.192203	106.2	136.4	105.2		129.1	67	93.9	73.6	96.3	0.333903	0.71624
Q9BVI0	PHF20	PHD finger protein 20	1.42407	0.192362	132.9	140.9	110.1		76.9	63.8	163.8	64	80.8	0.510017	0.71588
Q8IY31	IFT20	Intraflagellar transport protein 20 homolog	0.817993	0.192456	111.908	103.759	90.1003	91.2631	100.086	95.3801	163.443	109.612	138.192	-0.289839	0.71567
Q8N3R9	PALS1	Protein PALS1	0.889555	0.192617	108.802	108.69	107.246	82.1743	104.801	96.7989	127.472	118.804	123.916	-0.168845	0.715306
P68036	UBE2L3	Ubiquitin-conjugating enzyme E2 L3	1.16328	0.19284	100.215	91.9394	86.3012	120.408	89.9387	84.3915	107.308	76.116	70.8415	0.218204	0.714804
Q9NZ63	C9orf78	Telomere length and silencing protein 1 homolog	1.14796	0.193035	89.2772	98.0947	92.3082	117.362	88.5424	82.6641	109.117	75.7754	76.2347	0.199076	0.714364
P08047	SP1	Transcription factor Sp1	1.10819	0.193112	92.9387	104.949	110.669	112.377	91.1276	79.975	102.566	90.5557	110.573	0.148209	0.714191
A0A0C4DGQ5	CAPNS1	Calpain small subunit 1	1.06572	0.193288	101.756	96.4407	96.0542	115.628	92.8653	93.0585	98.9532	95.2811	100.596	0.0918253	0.713795
A0A8Q3WKN6	MTCL1	Microtubule cross-linking factor 1	0.743804	0.193309	52.5574	49.6921	57.7149	109.761	123.862	96.0278	76.7076	78.9998	77.69	-0.427006	0.713748
Q6FI13	H2AC19	Histone H2A type 2-A	0.881635	0.19357	94.717	93.656	94.9099	90.9458	121.724	121.049	111.886	84.9752	90.9553	-0.181746	0.713162
Q8TEP8	CEP192	Centrosomal protein of 192 kDa	1.21009	0.193891	103.8	128.4	104.4		82.4	62.8	109.1	109.5	99.8	0.27512	0.712443
A0A0A0MQS9	LAMA4	Laminin subunit alpha-4	1.18379	0.19397	98	126.2	120		114.6	103.1	68.4	104.5	94	0.243418	0.712265
C9JVC9	CACNA2D2	Voltage-dependent calcium channel subunit alpha-2/delta-2	1.59578	0.194052	84.8633	85.0971	92.5003	226.306	63.2774	54.0819	88.448	81.7462	95.3057	0.67426	0.712081
Q86W92	PPFIBP1	Liprin-beta-1	1.10874	0.19422	99.3341	103.115	110.78	100.844	86.5597	80.8367	86.0487	100.05	113.335	0.148919	0.711706
Q96SU4	OSBPL9	Oxysterol-binding protein-related protein 9	1.11619	0.194317	94.9396	98.1356	96.6316	115.795	106.032	95.4096	89.2996	89.9576	73.4137	0.158588	0.71149
E9PC47	LIMK1	LIM domain kinase 1	0.836262	0.194397	90.5	85.2	95.6		128.9	130.6	89.5	98.5	93.2	-0.257974	0.71131
A0A0G2JH66	HLA-F	HLA class I histocompatibility antigen, alpha chain F	0.826642	0.194468	74.1	91.9	99.6		121.6	118.2	75	103.6	117.1	-0.274666	0.711152
O15031	PLXNB2	Plexin-B2	1.02263	0.19512	97.9144	101.634	99.3218	100.911	94.4964	95.5017	98.1154	99.9249	100.629	0.0322857	0.709698
J3KPP4	LUC7L3	Cisplatin resistance-associated overexpressed protein, isoform CRA_b	1.09708	0.19563	98.8405	103.21	95.9277	104.918	90.8789	85.5388	112.142	82.626	87.869	0.133667	0.708565
Q8TEY7	USP33	Ubiquitin carboxyl-terminal hydrolase 33	1.11549	0.195717	90.9709	106.676	117.442	105.011	102.626	96.9961	85.242	106.775	79.118	0.15768	0.708371
E9PDI4	LAD1	Ladinin-1	1.24847	0.196082	150.9	99.4	95.4		93.5	84.3	117.1	87.7	78.9	0.320156	0.707562
A0A3B3ISM6	UROS	Uroporphyrinogen-III synthase	1.24064	0.196183	97.4463	104.832	120.218	130.343	74.8798	67.9047	71.0845	121.962	120.423	0.311089	0.707338
Q96EK9	KTI12	Protein KTI12 homolog	0.831451	0.196259	107.838	94.799	93.944	77.1376	122.373	116.067	144.924	92.1271	86.3558	-0.266298	0.707169
O14717	TRDMT1	tRNA (cytosine(38)-C(5))-methyltransferase	1.05832	0.196302	107.018	112.447	114.431	101.816	100.336	92.9228	104.094	110.15	107.122	0.0817805	0.707076
G3V1A6	GSDMD	Gasdermin domain containing 1, isoform CRA_d	0.836116	0.196881	69.714	70.1838	76.7606	113.719	112.369	104.665	77.3243	100.155	99.4035	-0.258225	0.705797
H0YB09	DGLUCY	D-glutamate cyclase, mitochondrial (Fragment)	1.23789	0.197139	135.628	109.261	95.3787	102.729	82.4951	70.6102	133.73	82.8946	77.6013	0.307878	0.705228
P07686	HEXB	Beta-hexosaminidase subunit beta	1.06082	0.197214	97.4028	100.397	104.688	101.42	93.3111	94.5087	83.8303	102.193	102.093	0.0851841	0.705062
P61086	UBE2K	Ubiquitin-conjugating enzyme E2 K	0.915476	0.197287	93.5926	104.003	106.317	93.4193	112.206	116.412	88.9656	109.577	115.361	-0.127406	0.704902
Q9BQ95	ECSIT	Evolutionarily conserved signaling intermediate in Toll pathway, mitochondrial	1.07589	0.197318	110.483	120.137	117.133	99.0963	99.3273	94.7149	102.653	110.697	111.77	0.105531	0.704832
Q9NVF7	FBXO28	F-box only protein 28	1.44515	0.197395	86.6	149.5	144.9		59.5	47	84.1	107.4	141.4	0.531222	0.704664
Q8NI27	THOC2	THO complex subunit 2	0.877878	0.19744	120.007	122.057	117.836	73.4489	128.57	116.871	121.334	129.053	121.213	-0.187908	0.704564
P31948	STIP1	Stress-induced-phosphoprotein 1	0.957332	0.197489	97.8469	95.9063	100.605	97.0696	99.9917	97.6426	103.975	97.949	111.533	-0.0629095	0.704457
Q6PJW8	CNST	Consortin	0.844192	0.197631	98.8	91.1	86.1		126.2	90	120.4	86.4	121.9	-0.244358	0.704146
Q13158	FADD	FAS-associated death domain protein	0.925533	0.197665	101.118	107.424	110.631	90.5554	110.952	118.754	96.4145	114.158	113.089	-0.111644	0.704069
A0A8Q3SHZ3	PCNT	Pericentrin	1.1673	0.198371	113.109	90.7315	84.0559	116.694	96.2788	91.6717	102.484	72.1151	70.7047	0.223174	0.702522
Q5TE64	BCL2L1	Bcl-2-like protein 1	0.850509	0.198379	101.547	104.383	99.911	69.9793	131.433	126.852	98.1658	106.674	89.2218	-0.233602	0.702505
H3BLV9	SRPK1	SRSF protein kinase 1 (Fragment)	0.846514	0.198655	89.5897	89.092	93.2729	84.9941	135.878	122.539	92.1779	88.1961	88.2957	-0.240394	0.701901
Q9H6S1	AZI2	5-azacytidine-induced protein 2	1.28253	0.19888	134	114.3	98.6		79.4	81.2	137.8	73.3	79.1	0.358998	0.701409
Q8NFV4	ABHD11	Protein ABHD11	1.1185	0.198948	95.4631	90.0682	89.8853	119.45	94.1829	84.4903	99.1207	81.4728	82.0215	0.161571	0.70126
P49407	ARRB1	Beta-arrestin-1	0.863134	0.199436	84.5544	103.986	101.465	89.4631	127.304	123.733	78.3573	109.133	111.024	-0.212344	0.700196
Q9NXG2	THUMPD1	THUMP domain-containing protein 1	1.03757	0.199724	104.179	98.3305	96.348	100.602	101.701	97.4384	90.3015	96.5463	95.2576	0.0532077	0.699569
O75223	GGCT	Gamma-glutamylcyclotransferase	0.868457	0.199942	80.1697	82.3101	88.0504	92.3846	118.114	116.265	84.3533	93.4015	81.4345	-0.203473	0.699095
P49411	TUFM	Elongation factor Tu, mitochondrial	0.939883	0.200162	87.9748	95.0442	97.0079	101.067	98.3825	99.2662	92.295	107.219	109.674	-0.0894463	0.698617
D6W601	ADAT3	HCG22695, isoform CRA_a	1.16332	0.200584	97.5808	94.9386	90.1097	128.367	75.3495	72.434	95.7586	96.5786	101.499	0.218249	0.697704
Q96CM8	ACSF2	Medium-chain acyl-CoA ligase ACSF2, mitochondrial	1.19868	0.200646	114.766	99.9509	92.736	118.097	108.416	101.009	104.953	60.7017	68.6862	0.261452	0.69757
Q9Y2L5	TRAPPC8	Trafficking protein particle complex subunit 8	0.868175	0.200779	86.0197	101.395	107.005	91.8964	117.913	111.784	78.8514	123.108	124.562	-0.203942	0.697281
Q14847	LASP1	LIM and SH3 domain protein 1	1.07853	0.201147	108.7	101.5	97.7		104.7	101	93.5	91.5	85.1	0.109072	0.696486
Q9NVK5	FGFR1OP2	FGFR1 oncogene partner 2	0.886172	0.201258	95	87.5	85		109.9	98.5	116.9	84.9	92.9	-0.174341	0.696246
Q96BD5	PHF21A	PHD finger protein 21A	1.26295	0.201453	124.3	116.8	102.7		74.4	63.8	133.4	85.6	96.5	0.336796	0.695825
Q8IX03	WWC1	Protein KIBRA	1.09934	0.201475	115.9	102.7	92.8		98.2	100.3	100.6	86.5	86.5	0.136642	0.695778
Q9UJJ7	RPUSD1	RNA pseudouridylate synthase domain-containing protein 1	1.19496	0.201522	100.57	91.2614	80.4736	129.811	90.8264	80.6476	104.659	72.0347	72.4697	0.256964	0.695677
O95985	TOP3B	DNA topoisomerase 3-beta-1	1.22092	0.201635	113.094	125.072	99.9176	97.6268	88.2389	68.7744	129.264	93.3296	66.4786	0.287975	0.695434
Q7L2Z9	CENPQ	Centromere protein Q	0.876607	0.201766	79.664	79.7605	95.4036	93.4447	99.5558	112.302	73.7736	99.942	111.047	-0.189997	0.695152
P43034	PAFAH1B1	Platelet-activating factor acetylhydrolase IB subunit beta	1.11211	0.201775	99.2283	87.3541	89.2871	114.93	85.9733	79.714	102.082	84.6847	86.8018	0.153296	0.695133
Q9UI10	EIF2B4	Translation initiation factor eIF-2B subunit delta	1.30946	0.20182	100.756	81.7226	71.4364	148.171	73.2993	69.3306	104.158	69.4116	67.6297	0.388971	0.695036
Q9NQC3	RTN4	Reticulon-4	0.843672	0.202295	93.536	106.261	109.633	82.6426	134.105	139.76	81.0283	113.331	112.678	-0.245245	0.694016
Q9ULC4	MCTS1	Malignant T-cell-amplified sequence 1	1.13445	0.202422	134.62	118.918	115.733	97.4091	89.7098	85.7568	114.306	116.282	108.157	0.181998	0.693743
Q6P6B1	ERICH5	Glutamate-rich protein 5	1.11522	0.202554	86.6774	85.6944	89.0007	115.956	83.1031	78.5458	85.2476	82.7456	93.2899	0.157325	0.693458
Q8IX90	SKA3	Spindle and kinetochore-associated protein 3	1.2388	0.202558	127.653	113.873	113.873	100.033	73.9213	69.3279	142.074	84.4967	89.731	0.308939	0.69345
Q969P0	IGSF8	Immunoglobulin superfamily member 8	1.1188	0.202568	97.4	116.1	106.7		98.8	91.3	111.2	79.5	96.2	0.16195	0.69343
Q9UBU7	DBF4	Protein DBF4 homolog A	1.31121	0.202687	73.9577	69.9237	81.0767	140.287	61.6183	58.2961	69.8446	73.7204	84.7152	0.390897	0.693174
A0A7P0T8C7	SNX9	Sorting nexin-9	0.906915	0.202934	94.2829	85.447	89.1621	96.5189	116.272	111.854	91.9735	88.9613	94.5841	-0.14096	0.692645
Q86SX6	GLRX5	Glutaredoxin-related protein 5, mitochondrial	1.13242	0.202979	103.62	96.4127	92.0132	106.938	87.333	84.0569	113.729	73.0115	82.2784	0.179413	0.692548
Q86Y37	CACUL1	CDK2-associated and cullin domain-containing protein 1	0.86259	0.203119	87.6498	90.0241	88.2434	102.316	118.911	132.563	81.1206	98.9275	102.093	-0.213253	0.69225
A0A0G2JHL1	GPANK1	G patch domain and ankyrin repeat-containing protein 1	0.582671	0.203241	57.2	58.7	77.5		167.2	169	55.7	87.2	74.1	-0.779248	0.69199
Q12931	TRAP1	Heat shock protein 75 kDa, mitochondrial	1.04787	0.203324	103.003	100.002	96.4199	106.745	92.4508	94.0966	105.907	95.0646	97.0008	0.0674535	0.691811
Q15417	CNN3	Calponin-3	0.822053	0.203367	85.783	82.17	93.5251	91.5371	94.6607	86.5056	84.2346	129.965	141.423	-0.282696	0.69172
Q8IWE4	DCUN1D3	DCN1-like protein 3	0.525854	0.204019	71.0511	34.4781	39.2789	50.1013	175.009	132.85	78.7323	41.8102	34.9146	-0.927265	0.690329
Q7L5N1	COPS6	COP9 signalosome complex subunit 6	1.09145	0.204077	113.543	92.0339	89.1787	110.62	95.7457	95.6505	97.9347	88.5124	86.4186	0.126248	0.690206
Q9BZE1	MRPL37	39S ribosomal protein L37, mitochondrial	0.893076	0.20413	81.3001	91.6332	97.3846	101.668	100.797	107.328	82.1774	113.957	116.394	-0.163145	0.690093
A0A8I5KY61	SBF1	Myotubularin-related protein 5	0.80628	0.204268	87.9252	80.6062	83.4362	84.287	138.084	132.034	79.3376	86.8517	84.9976	-0.310647	0.6898
A0A087X0W9	OTUD6B	Ubiquitinyl hydrolase 1	1.1399	0.204379	102.746	103.306	90.812	115.416	93.8888	94.728	112.443	73.4701	77.5725	0.188902	0.689563
P30533	LRPAP1	Alpha-2-macroglobulin receptor-associated protein	1.21011	0.204686	101.723	94.1843	85.4044	125.558	87.9763	82.3891	115.646	66.4257	67.8446	0.275137	0.688911
D3YTA9	PPP3R1	Calcineurin subunit B type 1	0.855422	0.204699	78.3427	104.17	109.443	90.4042	107.183	109.013	84.2614	122.141	136.131	-0.225291	0.688884
Q9Y3I0	RTCB	RNA-splicing ligase RtcB homolog	1.115	0.205162	88.9086	99.335	102.463	124.764	86.8234	90.8043	86.1599	98.2924	103.695	0.157041	0.687902
O43861	ATP9B	Probable phospholipid-transporting ATPase IIB	0.839228	0.205372	83.8	88.2	91.4		121.1	115.9	117.5	75.4	93.2	-0.252866	0.687458
P62979	RPS27A	Ubiquitin-40S ribosomal protein S27a	1.17027	0.205542	110.282	94.0359	90.5	115.042	68.4245	67.5644	106.746	99.6742	95.3738	0.226842	0.6871
J3QQJ0	SAP30BP	SAP30-binding protein (Fragment)	0.888702	0.205614	75.0681	99.8865	101.01	92.1833	115.921	110.202	83.6473	99.6822	108.364	-0.170228	0.686947
Q6BCY4	CYB5R2	NADH-cytochrome b5 reductase 2	1.3187	0.206291	85.1586	82.6587	75.9654	151.218	90.0778	82.5781	83.3039	59.2724	59.1917	0.399111	0.68552
Q15043	SLC39A14	Metal cation symporter ZIP14	1.34055	0.20659	92.0206	93.4647	76.5367	141.156	92.5019	78.6226	108.547	44.3656	51.907	0.422826	0.684891
H0Y8P4	UTP15	U3 small nucleolar RNA-associated protein 15 homolog (Fragment)	0.960191	0.206607	101.178	96.9831	94.4861	98.0252	104.874	104.474	106.971	96.8832	95.385	-0.0586068	0.684854
Q9H4A3	WNK1	Serine/threonine-protein kinase WNK1	1.07034	0.206829	100.863	91.8249	92.5941	113.038	97.2094	94.5171	94.0364	87.498	91.921	0.0980628	0.684388
Q9Y4C1	KDM3A	Lysine-specific demethylase 3A	1.14376	0.20695	102.422	140.162	129.252	97.6632	96.299	92.7365	96.1877	109.324	118.565	0.193778	0.684135
P25942	CD40	Tumor necrosis factor receptor superfamily member 5	0.797304	0.20718	88.2	82.5	86		129.2	140.4	92.5	92.2	82.3	-0.326798	0.683652
Q8N2E2	VWDE	von Willebrand factor D and EGF domain-containing protein	1.14872	0.207183	116.308	140.257	117.059	110.859	102.883	97.5138	78.8272	122.644	125.329	0.200029	0.683647
Q8WUF5	PPP1R13L	RelA-associated inhibitor	0.928004	0.207343	93.8827	89.3224	89.025	94.2222	96.7577	97.8482	115.495	91.9991	91.5034	-0.107797	0.683311
O15382	BCAT2	Branched-chain-amino-acid aminotransferase, mitochondrial	1.05716	0.207481	102.47	105.076	103.071	100.642	97.3561	109.287	93.2453	97.9577	88.4326	0.0801893	0.683022
O14893	GEMIN2	Gem-associated protein 2	1.15252	0.207536	141.356	113.511	111.49	112.837	93.1892	76.1232	116.43	113.848	120.135	0.204786	0.682907
P11802	CDK4	Cyclin-dependent kinase 4	1.28088	0.207664	157.595	106.354	102.788	115.954	97.1853	77.7279	145.88	80.784	69.4763	0.357137	0.682639
Q8NE01	CNNM3	Metal transporter CNNM3	1.15743	0.207692	93.9045	107.221	110.574	127.891	84.6324	77.3331	87.5916	104.755	120.438	0.210921	0.68258
P31942	HNRNPH3	Heterogeneous nuclear ribonucleoprotein H3	1.16419	0.207709	112.222	100.265	93.5811	107.531	82.566	80.6831	123.52	78.706	78.6119	0.219321	0.682545
Q9BZJ0	CRNKL1	Crooked neck-like protein 1	0.904569	0.207812	101.547	85.6677	86.8439	91.1665	113.995	108.506	105.467	92.1369	84.5895	-0.144698	0.682329
O76041	NEBL	Nebulette	0.768689	0.208002	92.7337	114.97	117.903	78.2389	123.156	107.273	84.7921	155.289	186.2	-0.379527	0.681932
Q08J23	NSUN2	RNA cytosine C(5)-methyltransferase NSUN2	0.937792	0.208107	96.2317	93.8846	89.875	98.0119	95.5471	96.4273	115.204	101.024	95.6449	-0.0926602	0.681712
Q9Y2Z9	COQ6	Ubiquinone biosynthesis monooxygenase COQ6, mitochondrial	0.846854	0.208449	101.8	74.8	80.2		90.1	84.2	97.9	121.7	111.5	-0.239815	0.681
Q2M2H8	MGAM2	Probable maltase-glucoamylase 2	1.29068	0.209288	127.5	120	99.9		47.7	69.9	114.5	109.5	107	0.368134	0.679256
A0A087WW40	SH3GLB1	Endophilin-B1	1.09998	0.210005	120.719	96.3235	92.9732	107.902	97.1611	81.9797	94.0202	103.862	97.894	0.137472	0.67777
O95628	CNOT4	CCR4-NOT transcription complex subunit 4	0.890078	0.21018	81.5083	84.5092	92.1566	102.33	106.29	110.259	77.5394	101.74	110.452	-0.167996	0.677409
Q13200	PSMD2	26S proteasome non-ATPase regulatory subunit 2	1.10698	0.210423	110.024	117.799	124.817	107.289	98.4714	98.7953	85.2987	118.878	117.906	0.146632	0.676906
Q96HA7	TONSL	Tonsoku-like protein	0.959022	0.210579	105.536	95.5799	92.4935	101.459	100.359	100.06	106.93	106.134	101.454	-0.0603636	0.676586
Q86VS8	HOOK3	Protein Hook homolog 3	1.05005	0.210662	102.731	100.27	110.42	100.499	104.064	103.756	90.9404	99.3476	94.6314	0.0704588	0.676414
P00374	DHFR	Dihydrofolate reductase	1.02342	0.210933	97.8632	102.727	97.6647	102.856	98.7565	99.6498	99.2528	94.3894	97.8632	0.0334047	0.675855
O96018	APBA3	Amyloid-beta A4 precursor protein-binding family A member 3	1.62057	0.211009	167.9	129.1	93.2		44.7	52.9	174.1	56.2	73.4	0.696498	0.675699
Q9BSB4	ATG101	Autophagy-related protein 101	1.13304	0.211023	127.63	95.196	86.1069	106.468	90.2209	84.0021	101.893	97.8749	84.2891	0.180202	0.67567
H7C5A2	EMC1	ER membrane protein complex subunit 1	0.929865	0.211101	100.654	98.7343	98.5321	94.4264	114.6	118.441	95.2983	100.856	98.229	-0.104907	0.675509
Q9UNS1	TIMELESS	Protein timeless homolog	0.842436	0.211924	85.9961	89.1339	89.3301	86.7182	130.808	129.141	87.8592	86.4864	86.7806	-0.247361	0.673819
Q9BRP8	PYM1	Partner of Y14 and mago	0.883031	0.212168	95.8604	91.9168	95.6582	91.8004	120.432	128.926	91.8157	101.422	88.5799	-0.179464	0.673319
A0A087X1E4	ARFIP2	Arfaptin-2	0.936373	0.212218	101.386	93.4058	91.2574	89.0922	109.673	100.567	105.376	95.4519	89.7228	-0.0948448	0.673218
Q96I76	GPATCH3	G patch domain-containing protein 3	0.823444	0.212967	108.03	91.7025	93.8273	83.9994	98.4124	90.696	98.0769	156.677	129.278	-0.280258	0.671689
Q06787	FMR1	Fragile X messenger ribonucleoprotein 1	0.928945	0.213275	104.025	101.268	105.828	90.5437	107.1	112.932	92.4667	116.326	111.66	-0.106335	0.67106
Q14CS0	UBXN2B	UBX domain-containing protein 2B	0.842679	0.213353	88.1576	89.6899	103.481	94.4019	136.067	137.497	82.1306	96.3298	105.319	-0.246944	0.6709
P61006	RAB8A	Ras-related protein Rab-8A	1.09643	0.213451	115.586	97.0413	92.5277	110.114	94.1958	100.279	103.419	96.06	79.4777	0.132819	0.670702
Q9BZZ5	API5	Apoptosis inhibitor 5	0.930728	0.213492	97.1825	100.347	101.368	96.0442	113.107	117.905	95.4471	108.82	95.1409	-0.103569	0.670619
Q7Z3K6	MIER3	Mesoderm induction early response protein 3	1.18176	0.213501	112.7	107.1	103.6		71.1	73.1	118.9	96.8	96.2	0.240935	0.670599
Q53H12	AGK	Acylglycerol kinase, mitochondrial	1.14012	0.213646	115.153	108.159	99.983	106.17	82.3505	71.3179	117.813	94.7622	104.613	0.189181	0.670305
O60812	HNRNPCL1	Heterogeneous nuclear ribonucleoprotein C-like 1	1.10531	0.213939	112.3	106.6	105		101	112.5	104.3	87	83.6	0.144451	0.66971
Q643R3	LPCAT4	Lysophospholipid acyltransferase LPCAT4	1.18278	0.214166	111.7	110.4	114		79.9	66.2	111.2	102	114.3	0.242187	0.669249
O95159	ZFPL1	Zinc finger protein-like 1	1.09644	0.214645	110.898	104.204	96.83	104.317	97.7032	100.323	110.122	88.5829	77.8133	0.132831	0.66828
A0A140T9T7	TAP1	Antigen peptide transporter 1	1.14278	0.214852	109	108.8	104.6		82.9	71.4	104.1	109.3	102.5	0.192543	0.66786
A0A2R8Y5S7	RDX	Radixin	1.12687	0.214898	118.999	100.847	96.8128	104.721	89.5518	89.7535	118.596	91.2662	78.257	0.172316	0.667767
Q9NYY8	FASTKD2	FAST kinase domain-containing protein 2, mitochondrial	0.930744	0.21502	100.345	96.7856	94.8084	100.266	105.387	98.8617	92.0403	117.349	113.098	-0.103544	0.667521
Q8N1N4	KRT78	Keratin, type II cytoskeletal 78	0.744799	0.215024	104.587	85.8061	102.338	28.905	95.7025	95.2526	124.604	143.61	80.633	-0.425077	0.667512
Q9BSW2	CRACR2A	EF-hand calcium-binding domain-containing protein 4B	1.26695	0.215251	76.516	85.2488	91.237	150.445	94.7302	76.8487	71.9417	70.5278	84.0013	0.341357	0.667056
Q9Y6E2	BZW2	eIF5-mimic protein 1	0.898351	0.215287	85.673	95.7522	98.2226	97.1673	119.073	111.167	84.7837	114.824	94.4676	-0.154649	0.666981
Q49AM3	TTC31	Tetratricopeptide repeat protein 31	0.850857	0.2153	105.521	77.4016	81.1247	92.818	124.528	126.88	94.3515	96.2131	82.3004	-0.233012	0.666957
Q96KP1	EXOC2	Exocyst complex component 2	1.09078	0.215363	129.809	118.861	106.662	98.6748	103.43	100.406	115.942	101.449	99.051	0.12536	0.666828
Q68CP9	ARID2	AT-rich interactive domain-containing protein 2	1.21102	0.215506	148.986	156.582	142.247	75.2992	101.57	107.084	116.15	103.04	112.107	0.276226	0.666541
O75976	CPD	Carboxypeptidase D	1.10529	0.215597	108.953	104.921	95.678	114.848	93.908	84.8613	118	89.188	94.0063	0.14443	0.666357
P62304	SNRPE	Small nuclear ribonucleoprotein E	0.901191	0.215632	101.39	107.438	112.606	90.5901	102.599	114.806	97.6507	128.551	127.892	-0.150095	0.666288
O60879	DIAPH2	Protein diaphanous homolog 2	1.17038	0.215782	146.031	135.269	137.468	94.455	103.217	84.8182	135.154	109.812	115.135	0.22698	0.665985
Q9HBI6	CYP4F11	Cytochrome P450 4F11	1.15405	0.216005	117.2	89.7	103.1		83.1	69.3	100.4	92.6	102.3	0.206701	0.665535
Q9Y697	NFS1	Cysteine desulfurase, mitochondrial	0.940186	0.216262	102.189	91.9701	92.1725	91.963	104.314	102.594	108.563	88.6313	98.8502	-0.0889826	0.66502
P40925	MDH1	Malate dehydrogenase, cytoplasmic	1.05148	0.216414	96.4664	95.3192	94.1719	107.228	99.4302	95.8928	93.9807	90.7301	87.3839	0.0724272	0.664715
Q6PI48	DARS2	Aspartate--tRNA ligase, mitochondrial	1.18289	0.216435	106.331	84.1178	77.7466	120.931	78.6076	73.2695	105.728	78.5215	75.0775	0.242311	0.664672
O15294	OGT	UDP-N-acetylglucosamine--peptide N-acetylglucosaminyltransferase 110 kDa subunit	1.11597	0.216879	107.718	99.2563	93.2667	113.628	100.682	88.2279	111.901	84.9003	77.8649	0.158294	0.663783
Q86WN1	FCHSD1	F-BAR and double SH3 domains protein 1	1.30243	0.217005	126.379	88.7145	75.4159	110.162	80.1347	64.777	123.462	60.0581	56.1115	0.381201	0.663531
Q9NR33	POLE4	DNA polymerase epsilon subunit 4	0.919897	0.217039	86.7196	97.66	99.567	105.612	114.924	115.124	90.0319	104.887	104.385	-0.120455	0.663463
O95777	LSM8	U6 snRNA-associated Sm-like protein LSm8	0.879022	0.217333	86.267	90.5455	94.1275	91.5775	121.391	122.684	83.083	96.0181	92.3365	-0.186029	0.662874
Q8NC51	SERBP1	Plasminogen activator inhibitor 1 RNA-binding protein	0.853088	0.217353	102.791	122.057	114.619	72.0413	117.18	113.278	142.908	131.69	97.9141	-0.229234	0.662835
Q9BV73	CEP250	Centrosome-associated protein CEP250	1.08045	0.217396	101.272	107.806	105.458	94.0216	107.397	93.6152	101.068	85.6523	84.9377	0.11163	0.662749
A0A087WYT3	PTGES3	Prostaglandin E synthase 3	0.91563	0.217453	91.8735	99.0216	106.8	95.0031	103.542	109.008	89.8763	111.11	122.568	-0.127163	0.662635
P05161	ISG15	Ubiquitin-like protein ISG15	1.44836	0.217667	211.663	112.926	104.851	99.0197	68.632	50.5224	147.761	106.005	83.1659	0.534418	0.662208
Q00534	CDK6	Cyclin-dependent kinase 6	0.69913	0.217806	56.047	52.9286	52.3387	110.63	133.586	122.798	108.976	58.4069	62.4524	-0.516367	0.661931
Q9BQL6	FERMT1	Fermitin family homolog 1	1.1016	0.217953	108.586	93.2714	92.975	121.472	101.472	94.5559	101.867	84.8731	89.6157	0.139605	0.661638
O94973	AP2A2	AP-2 complex subunit alpha-2	1.06623	0.218092	103.79	110.723	109.5	106.816	92.7792	95.43	94.5124	112.558	109.806	0.0925165	0.66136
Q96RE7	NACC1	Nucleus accumbens-associated protein 1	0.903032	0.218205	83.6228	83.4445	81.7507	107.982	106.891	109.655	92.9836	91.0223	93.3402	-0.147151	0.661135
P56545	CTBP2	C-terminal-binding protein 2	1.13253	0.218212	128.534	114.65	108.654	94.6367	84.6725	87.302	121.592	97.9255	101.291	0.179553	0.661122
Q6GQQ9	OTUD7B	OTU domain-containing protein 7B	0.848628	0.218592	96.5768	105.943	92.414	92.3871	138.829	139.662	111.667	88.9797	91.3733	-0.236796	0.660365
Q00169	PITPNA	Phosphatidylinositol transfer protein alpha isoform	1.08996	0.218955	101.733	94.6151	93.2865	115.508	84.9353	83.322	94.8049	99.7397	101.828	0.124275	0.659646
P38606	ATP6V1A	V-type proton ATPase catalytic subunit A	0.935365	0.218961	91.2758	93.9258	96.9683	94.5869	109.04	111.592	90.3925	98.5386	93.9258	-0.0963994	0.659634
Q9H0A0	NAT10	RNA cytidine acetyltransferase	0.934504	0.21909	105.412	107.856	108.069	91.6027	107.219	108.813	99.4615	119.12	117.739	-0.0977266	0.659378
Q9Y6M5	SLC30A1	Zinc transporter 1	1.24829	0.219383	102.1	123.3	122.2		66.5	63.5	97.4	115.5	121.2	0.319958	0.658796
Q9NZM3	ITSN2	Intersectin-2	1.20204	0.219588	104.673	80.5243	76.5272	121.847	81.2738	77.5265	103.841	69.3658	66.8676	0.265489	0.65839
O14646	CHD1	Chromodomain-helicase-DNA-binding protein 1	0.759933	0.21976	82.9	76.1	75.5		140	126.8	97.9	80.7	68.9	-0.396057	0.658052
Q13509	TUBB3	Tubulin beta-3 chain	1.1262	0.21976	107.741	99.3131	93.6627	109.135	104.772	106.209	94.4288	76.8072	72.6891	0.171464	0.658051
A0A7P0T9U7	SF1	Splicing factor 1	0.922471	0.219771	88.2904	101.889	102.904	97.1802	105.137	115.285	88.0875	109.703	110.617	-0.116424	0.658031
Q96HW7	INTS4	Integrator complex subunit 4	1.05188	0.219831	116.122	106.172	101.966	102.521	96.529	95.8109	105.966	107.095	101.761	0.0729753	0.657911
Q9Y676	MRPS18B	28S ribosomal protein S18b, mitochondrial	0.492328	0.220059	53.4548	36.9417	37.878	63.8921	185.9	163.769	62.4774	37.1119	38.6441	-1.02231	0.657461
O43665	RGS10	Regulator of G-protein signaling 10	0.9147	0.220108	103.856	88.3025	88.401	102.239	105.628	112.519	116.162	99.9187	88.8932	-0.12863	0.657364
Q5VWJ9	SNX30	Sorting nexin-30	0.940321	0.220233	97.5794	95.8658	92.3376	91.0992	105.644	99.6963	110.987	90.1199	94.5553	-0.0887751	0.657117
Q86YM7	HOMER1	Homer protein homolog 1	1.20729	0.220344	87.5	122.3	119.5		89.7	69.1	85.7	120.6	89.5	0.27177	0.6569
P46976	GYG1	Glycogenin-1	1.20532	0.220473	104.437	84.2259	80.149	128.316	81.2767	79.3684	109.207	69.1329	72.8628	0.269418	0.656644
E9PJZ3	ZNF7	Zinc finger protein 7	1.10142	0.220648	91.4	108.6	114.3		97.3	93.8	81.7	99.1	103.7	0.139359	0.6563
Q9NYK5	MRPL39	39S ribosomal protein L39, mitochondrial	0.853249	0.220851	83.7992	80.9031	79.315	91.6655	120.14	121.542	80.2492	86.0413	83.7992	-0.228961	0.6559
A8MWD9	SNRPGP15	Putative small nuclear ribonucleoprotein G-like protein 15	0.951877	0.220874	95.8557	91.971	93.0393	94.2374	104.499	105.47	99.6433	92.1652	90.8056	-0.0711526	0.655855
Q5JPH6	EARS2	Probable glutamate--tRNA ligase, mitochondrial	1.069	0.220886	98.8115	102.102	103.263	112.134	97.7469	97.9404	83.4236	106.36	101.328	0.0962613	0.655831
A0A0A0MSI8	EXOC5	Exocyst complex component 5	1.25149	0.221096	102.503	84.1358	75.7561	140.143	80.9193	66.7838	108.259	72.7089	73.3861	0.323651	0.655419
O94808	GFPT2	Glutamine--fructose-6-phosphate aminotransferase [isomerizing] 2	0.892774	0.221322	98.1	80.2	89.8		100.9	118.3	87.4	93.6	100.3	-0.163633	0.654975
A0A0D9SGE8	PHF6	PHD finger protein 6	1.38868	0.22157	164.222	127.552	123.931	88.6184	58.287	53.3072	159.129	111.141	72.0948	0.473714	0.654489
O95263	PDE8B	High affinity cAMP-specific and IBMX-insensitive 3',5'-cyclic phosphodiesterase 8B	1.21133	0.221677	127	108.7	97.9		88.3	59.6	119.4	95.1	96.6	0.276591	0.654279
O14562	UBFD1	Ubiquitin domain-containing protein UBFD1	1.09663	0.221753	89.935	91.8189	108.676	95.0239	105.205	79.821	81.9033	87.1586	85.2746	0.133073	0.65413
A0A0B4J2E5	A0A0B4J2E5	Utp12 domain-containing protein	0.952658	0.221809	99	96.8	98.8		110.5	107.3	95.3	101.6	100.7	-0.0699695	0.65402
Q96EX1	SMIM12	Small integral membrane protein 12	1.43902	0.222004	184.821	119.781	129.483	99.15	50.5474	53.1825	76.1804	172.484	110.797	0.525091	0.65364
Q00535	CDK5	Cyclin-dependent kinase 5	1.19566	0.222379	150.345	124.52	116.885	100.898	81.0674	73.5445	123.398	117.559	119.468	0.257813	0.652907
Q9BQP7	MGME1	Mitochondrial genome maintenance exonuclease 1	1.06957	0.222479	101.932	93.0643	93.8614	106.996	97.6477	87.5841	82.7017	101.334	93.3632	0.0970331	0.65271
P50616	TOB1	Protein Tob1	0.684366	0.222552	87.7604	99.1192	119.132	66.0097	107.503	99.1192	74.238	183.634	215.006	-0.54716	0.652569
B1AP13	CD55	Complement decay-accelerating factor	1.38662	0.222595	107.641	80.1821	65.7217	138.104	83.919	71.0022	112.027	43.0562	43.0562	0.47157	0.652485
P68431	H3C12	Histone H3.1	1.26202	0.222992	122.747	113.735	114.616	130.667	59.9532	52.0182	126.372	119.123	119.71	0.335735	0.65171
Q9UBE0	SAE1	SUMO-activating enzyme subunit 1	0.954506	0.2231	98.9522	94.3498	96.8511	99.8731	100.953	101.954	92.6489	110.658	104.555	-0.0671733	0.6515
Q9Y248	GINS2	DNA replication complex GINS protein PSF2	1.17207	0.223329	105.136	125.044	124.721	112.476	70.1625	82.8606	99.648	118.049	127.734	0.229054	0.651054
Q9BXV9	GON7	EKC/KEOPS complex subunit GON7	0.846827	0.223391	88.6323	94.643	91.9942	82.4469	130.503	131.93	91.0773	87.7154	86.7985	-0.23986	0.650935
M0QXZ5	ZNF428	Zinc finger protein 428 (Fragment)	0.620775	0.223638	45.6634	51.8478	59.9808	91.2436	174.182	134.618	86.6672	50.4076	54.9824	-0.687857	0.650455
Q9H9P8	L2HGDH	L-2-hydroxyglutarate dehydrogenase, mitochondrial	0.869904	0.223751	85.4114	91.5547	94.5273	96.5918	122.271	131.189	85.5105	98.1934	91.7529	-0.201073	0.650235
Q6NXG1	ESRP1	Epithelial splicing regulatory protein 1	0.865398	0.224105	102.71	108.959	114.753	88.584	98.0516	106.687	108.732	148.27	137.704	-0.208565	0.649548
Q13610	PWP1	Periodic tryptophan protein 1 homolog	1.24893	0.224334	123.403	131.882	123.717	114.4	73.6862	61.8587	149.78	88.6537	119.845	0.320698	0.649105
Q9NTJ3	SMC4	Structural maintenance of chromosomes protein 4	0.952262	0.2244	95.8362	88.5685	88.9561	102.683	103.685	101.844	97.7742	95.4486	94.8672	-0.0705701	0.648977
P21964	COMT	Catechol O-methyltransferase	0.887562	0.224401	89.7225	90.2086	87.9728	91.6327	118.204	120.926	91.4723	88.556	87.1951	-0.172079	0.648975
P51665	PSMD7	26S proteasome non-ATPase regulatory subunit 7	0.94954	0.224747	106.472	106.367	106.472	92.3965	111.442	116.094	106.79	102.877	104.781	-0.0746997	0.648306
O95059	RPP14	Ribonuclease P protein subunit p14	0.779871	0.224777	102.153	134.843	142.488	57.1919	121.793	134.315	101.494	174.65	167.664	-0.358692	0.648247
A6NHR9	SMCHD1	Structural maintenance of chromosomes flexible hinge domain-containing protein 1	0.9069	0.22513	113.851	108.17	110.783	82.9223	108.284	103.511	112.374	120.214	128.622	-0.140985	0.647567
Q9NVE7	PANK4	4'-phosphopantetheine phosphatase	1.17081	0.225429	144.962	139.693	114.243	93.2842	99.3322	96.4173	132.518	107.853	89.3541	0.227502	0.64699
Q92542	NCSTN	Nicastrin	1.18354	0.225564	117.187	145.968	138.056	99.3953	87.2597	86.6864	94.9422	129.112	130.718	0.243106	0.64673
P35573	AGL	Glycogen debranching enzyme	1.04006	0.226055	114.232	107.817	103.574	100.535	103.885	104.609	105.644	100.16	97.8835	0.0566633	0.645786
E5RIM7	ATOX1	Copper transport protein ATOX1	1.28558	0.2262	90.8638	80.2496	74.2189	141.203	66.8211	65.4541	107.107	67.786	68.6705	0.362416	0.645508
Q8WWQ0	PHIP	PH-interacting protein	0.823315	0.226267	107.4	102.7	65.2		114.1	105.2	94.7	101.7	141.6	-0.280484	0.645378
Q9NVR0	KLHL11	Kelch-like protein 11	1.1999	0.226441	100.814	74.7373	73.2034	126.97	91.4403	73.5443	78.0609	74.1408	74.226	0.262918	0.645045
Q9HB71	CACYBP	Calcyclin-binding protein	1.11178	0.22679	120.02	84.4837	86.6868	99.1721	90.7098	82.1848	88.9856	91.1887	85.8247	0.152873	0.644376
P19838	NFKB1	Nuclear factor NF-kappa-B p105 subunit	0.852368	0.226879	118.061	113.889	119.83	72.4649	107.822	100.996	129.311	142.583	141.445	-0.230452	0.644205
Q9GZR1	SENP6	Sentrin-specific protease 6	1.16532	0.227072	111.55	84.8971	86.3882	121.582	75.2052	67.9363	93.3775	97.2915	99.9941	0.220725	0.643837
Q9H0K6	PUS7L	Pseudouridylate synthase PUS7L	1.22229	0.227338	128.8	114.6	96.3		69.2	71.6	124.9	98.4	99.1	0.289592	0.643327
I3L0A0	PEDS1-UBE2V1	HCG2044781	0.917803	0.227449	83.9645	87.0493	90.0377	99.9318	109.414	101.027	81.0725	101.316	98.8101	-0.123744	0.643116
Q8IVF2	AHNAK2	Protein AHNAK2	1.81373	0.2275	78.6904	59.2026	76.7416	249.198	71.7689	64.2425	67.9385	55.4394	60.2778	0.858962	0.643018
P22059	OSBP	Oxysterol-binding protein 1	1.21304	0.227621	101.442	82.8512	77.3335	129.837	92.1041	85.4828	96.8578	66.1282	62.8175	0.278631	0.642788
Q96A72	MAGOHB	Protein mago nashi homolog 2	1.10204	0.227763	92.5045	96.861	90.4654	113.56	84.8113	81.6598	106.315	83.0502	90.3727	0.140172	0.642518
P12429	ANXA3	Annexin A3	0.8694	0.228153	88.5291	74.3718	72.809	95.0493	112.983	104.433	101.675	79.5199	76.9458	-0.201908	0.641774
P35249	RFC4	Replication factor C subunit 4	1.28216	0.228153	98.4992	70.3454	70.5014	143.83	83.9934	76.9744	83.0575	65.9781	63.5604	0.358582	0.641773
O15355	PPM1G	Protein phosphatase 1G	0.909598	0.228447	93.5883	98.1892	105.614	93.0359	108.123	104.463	86.3731	115.025	122.554	-0.136699	0.641215
Q9NTG7	SIRT3	NAD-dependent protein deacetylase sirtuin-3, mitochondrial	1.3637	0.228501	80.9288	74.2649	67.527	161.538	73.6726	67.3049	74.9313	66.1943	70.1185	0.447523	0.641112
Q9NXC5	MIOS	GATOR complex protein MIOS	0.835145	0.22857	87.5606	84.7934	96.8503	94.5426	137.962	136.085	80.5439	93.4902	96.3561	-0.259902	0.640981
P14854	COX6B1	Cytochrome c oxidase subunit 6B1	0.690512	0.228607	68.5244	60.1974	60.8913	82.1659	141.559	149.453	86.0458	58.8096	56.1206	-0.534261	0.640911
Q9H9B4	SFXN1	Sideroflexin-1	1.08559	0.228791	115.789	107.387	102.058	110.197	87.4055	89.5573	115.277	107.592	101.546	0.118476	0.640562
P51798	CLCN7	H(+)/Cl(-) exchange transporter 7	1.2488	0.229163	122.26	90.5667	80.7244	132.596	65.3741	69.5277	124.157	79.9118	87.5869	0.320543	0.639856
P19474	TRIM21	E3 ubiquitin-protein ligase TRIM21	0.859479	0.229362	78.6112	72.5367	67.2661	104.484	111.217	104.874	90.8495	81.5591	81.1124	-0.218466	0.639478
Q9Y5K8	ATP6V1D	V-type proton ATPase subunit D	0.784933	0.229457	83.7171	82.3447	82.6388	81.8618	142.339	141.947	85.8738	82.0506	74.2083	-0.349358	0.639299
Q3ZCW2	LGALSL	Galectin-related protein	1.16737	0.229501	81.3481	88.5829	94.3179	129.613	83.0244	83.7303	68.9959	96.4354	89.5534	0.223266	0.639215
Q7Z6V5	ADAT2	tRNA-specific adenosine deaminase 2	0.949996	0.229659	94.4266	100.191	100.924	87.3319	109.413	95.265	99.8763	100.086	99.1427	-0.0740068	0.638917
Q08AD1	CAMSAP2	Calmodulin-regulated spectrin-associated protein 2	1.21239	0.230017	92.3721	96.9207	81.0005	137.372	98.7577	95.6961	92.4596	62.6311	70.7661	0.277858	0.63824
O95801	TTC4	Tetratricopeptide repeat protein 4	0.802313	0.23007	85.1604	73.6243	71.8423	88.2442	130.929	126.615	95.4772	73.8119	69.9666	-0.317763	0.63814
Q8NCW5	NAXE	NAD(P)H-hydrate epimerase	0.885314	0.230248	75.9272	99.8155	94.2647	91.7489	96.7427	96.9409	82.3701	119.739	114.981	-0.175738	0.637805
P31151	S100A7	Protein S100-A7	0.798266	0.230269	78.5	89.4	82.5		117.9	109	139	78.7	78.2	-0.325059	0.637764
Q99547	MPHOSPH6	M-phase phosphoprotein 6	1.09126	0.230314	114.318	116.214	113.426	91.3683	95.5809	88.2199	105.73	111.753	97.3654	0.125999	0.637679
Q6IE81	JADE1	Protein Jade-1	1.33278	0.230814	140.474	104.161	107.124	120.293	68.2303	64.7902	162.931	68.2303	78.5509	0.414437	0.636738
Q99873	PRMT1	Protein arginine N-methyltransferase 1	0.880941	0.230847	92.2039	103.525	110.057	89.7003	108.315	111.363	84.2571	127.583	129.651	-0.182882	0.636676
Q8NBF6	AVL9	Late secretory pathway protein AVL9 homolog	0.957108	0.231484	100.638	100.038	99.1386	94.2702	102.537	109.732	93.1424	103.336	105.934	-0.0632461	0.635479
O94855	SEC24D	Protein transport protein Sec24D	1.17709	0.231672	141.695	121.626	114.128	93.2434	92.4049	85.2374	134.968	99.1312	88.1044	0.235226	0.635126
Q9H3R5	CENPH	Centromere protein H	0.787046	0.231714	74.5	81.8	99.6		128	124	62.9	101.2	125.8	-0.345481	0.635048
P60228	EIF3E	Eukaryotic translation initiation factor 3 subunit E	0.934764	0.232458	115.664	106.527	108.978	91.3891	107.975	108.421	107.975	120.344	120.344	-0.0973265	0.633656
Q6NXT1	ANKRD54	Ankyrin repeat domain-containing protein 54	1.3443	0.232566	84.9627	82.7187	70.4927	164.512	77.8438	78.9271	89.915	62.0584	65.6952	0.42685	0.633454
Q8WYP5	AHCTF1	Protein ELYS	1.45096	0.233026	175.869	200.665	147.112	93.8271	85.8897	74.131	214.469	81.6719	75.7926	0.537003	0.632595
Q16537	PPP2R5E	Serine/threonine-protein phosphatase 2A 56 kDa regulatory subunit epsilon isoform	0.879775	0.233316	102.524	111.637	112.071	80.1458	125.958	128.779	87.3353	116.628	118.689	-0.184793	0.632056
O75663	TIPRL	TIP41-like protein	0.837144	0.233683	94.8784	82.2152	76.0754	81.4359	119.246	105.143	124.714	74.0608	76.4592	-0.256452	0.631372
P0C7T5	ATXN1L	Ataxin-1-like	1.09326	0.233726	104.6	94	103.6		84.7	81.4	106.9	91.5	96.2	0.128642	0.631294
Q16204	CCDC6	Coiled-coil domain-containing protein 6	0.69065	0.233752	78.2371	60.7012	57.6436	79.6274	140.017	142.445	114.838	50.6293	51.9782	-0.533972	0.631244
Q9BQK8	LPIN3	Phosphatidate phosphatase LPIN3	0.794375	0.234057	91.3	83.1	76.4		135.7	132.9	79.2	86.6	91.8	-0.332108	0.630678
P43490	NAMPT	Nicotinamide phosphoribosyltransferase	1.05626	0.234148	95.2077	103.529	99.0779	109.264	102.368	103.335	89.7893	95.4979	90.7569	0.0789596	0.63051
A0A7P0T9Z2	DENND5A	DENN domain-containing protein 5A	1.07504	0.234284	99.6	102	115.3		97.6	90.4	92.7	102.6	108	0.104389	0.630258
P0C7P3	SLFN14	Protein SLFN14	1.40236	0.234494	151.6	131.4	103.8		69.8	58.4	167.8	75.1	88.6	0.487861	0.629868
Q6P2E9	EDC4	Enhancer of mRNA-decapping protein 4	1.16431	0.23537	103.608	93.4785	82.9044	124.984	90.5462	88.6802	109.473	75.0849	70.9975	0.219469	0.628249
Q8N1G2	CMTR1	Cap-specific mRNA (nucleoside-2'-O-)-methyltransferase 1	0.844035	0.235635	94.1653	83.8314	107.346	92.8086	108.823	89.2093	86.2567	135.923	139.824	-0.244626	0.62776
G3V1S3	DENND5B	DENN domain-containing protein 5B	0.874119	0.235663	87.8	91.9	103.2		117.1	131.8	97.1	92	101.4	-0.194098	0.627708
Q7L775	EPM2AIP1	EPM2A-interacting protein 1	0.827078	0.235782	70.6	83.2	84.2		126.9	82.8	74.9	104.2	90.8	-0.273904	0.627489
P13796	LCP1	Plastin-2	0.398898	0.236328	59.1	37.7	40.7		214	200.2	92.5	36.6	31.2	-1.32591	0.626485
Q9H6R4	NOL6	Nucleolar protein 6	0.939145	0.236355	103.159	81.5766	87.2813	98.7219	101.733	93.8416	100.117	99.5463	98.2152	-0.0905803	0.626435
P25787	PSMA2	Proteasome subunit alpha type-2	0.907245	0.236454	96.2648	93.6134	97.2845	89.5652	115.232	121.249	86.0673	100.854	95.6529	-0.140436	0.626254
Q6KC79	NIPBL	Nipped-B-like protein	1.1702	0.236564	138.468	106.368	98.9912	103.758	94.3058	76.8603	126.804	97.1968	82.9413	0.226752	0.626052
Q8TCC3	MRPL30	39S ribosomal protein L30, mitochondrial	1.27965	0.236682	99.2441	74.7634	68.002	139.88	70.7221	79.4264	97.7675	64.6602	60.4635	0.355752	0.625835
A0A0A0MRM9	NOLC1	Nucleolar and coiled-body phosphoprotein 1 (Fragment)	1.09043	0.236804	98.815	108.393	99.4991	114.659	89.1387	96.2737	111.619	103.702	82.2969	0.124892	0.625611
A0A8I5KUR0	MED12	Mediator of RNA polymerase II transcription subunit 12	0.507926	0.236828	71.1	58.9	52		205.1	190.1	102.3	47.8	51.9	-0.97731	0.625567
Q9UL12	SARDH	Sarcosine dehydrogenase, mitochondrial	1.14181	0.237003	102.2	106.7	108.5		89.6	70.5	89.4	97.2	116.6	0.191321	0.625246
A0A669KB89	SCRIB	SCRIB overlapping open reading frame protein	1.0723	0.237144	101.946	101.946	97.4328	103.79	90.0738	83.8923	110.385	90.2701	97.629	0.10071	0.624988
A0A7I2YQU6	WASH6P	WAS protein family homolog 6	1.31119	0.237339	103.3	87.6434	72.0718	149.617	87.8136	86.1118	109.342	58.5424	51.565	0.390882	0.62463
Q9NRS6	SNX15	Sorting nexin-15	1.14202	0.237598	116.8	94.4	106.6		97.1	94.7	113.9	74.7	83.4	0.191582	0.624157
Q9H9S5	FKRP	Ribitol 5-phosphate transferase FKRP	0.792262	0.238194	89.8553	102.628	111.367	83.4466	119.434	93.6646	79.7718	148.788	169.403	-0.33595	0.62307
Q15554	TERF2	Telomeric repeat-binding factor 2	1.22286	0.238711	100.785	76.638	78.4362	137.44	80.2344	60.7966	81.0907	94.5345	85.3722	0.290258	0.622127
Q9NY12	GAR1	H/ACA ribonucleoprotein complex subunit 1	0.935351	0.23894	89.0652	89.2584	94.8612	96.0413	108.289	104.908	84.9114	94.5714	100.754	-0.0964208	0.621712
O00443	PIK3C2A	Phosphatidylinositol 4-phosphate 3-kinase C2 domain-containing subunit alpha	1.15871	0.239498	87.2719	99.7779	91.2307	133.3	102.747	100.498	79.5344	79.1745	82.0536	0.212521	0.620697
Q8WTT2	NOC3L	Nucleolar complex protein 3 homolog	0.924012	0.239729	96.9767	117.994	111.593	90.9359	114.366	110.846	101.244	119.701	118.634	-0.114016	0.62028
A0A0A0MRL7	CASP7	Caspase-7	1.06564	0.240173	100.939	98.3239	93.9647	117.131	93.771	92.4148	98.8082	93.9647	102.392	0.0917265	0.619476
P15514	AREG	Amphiregulin	1.36369	0.240207	122.322	93.3013	84.6046	140.746	41.5933	34.8817	105.968	116.083	105.685	0.447511	0.619414
A0A8I5KSE2	DNAH3	Dynein axonemal heavy chain 3	1.18451	0.240475	101	127.1	101.1		83.3	77.2	75.7	112.5	114.5	0.244295	0.618929
J3QLD1	MIF4GD	MIF4G domain containing, isoform CRA_b	1.4041	0.240565	175.7	98	89.4		65.3	67.2	133.3	98.2	67	0.489645	0.618768
A0A8I5QL06	DOT1L	Histone-lysine N-methyltransferase, H3 lysine-79 specific	1.40996	0.240683	96.3144	76.9756	65.8275	162.677	68.2543	62.9456	114.288	55.286	55.4376	0.495651	0.618555
P09132	SRP19	Signal recognition particle 19 kDa protein	1.08006	0.241361	102.02	118.539	115.942	102.189	103.579	109.397	84.2551	103.994	106.488	0.111117	0.617333
Q9UHB4	NDOR1	NADPH-dependent diflavin oxidoreductase 1	0.876879	0.241422	99.2418	116	113.17	74.2605	107.947	111.647	98.48	136.24	119.699	-0.18955	0.617223
Q2M3G4	SHROOM1	Protein Shroom1	1.21942	0.241441	129.933	100.183	98.291	101.286	64.6513	54.5594	115.742	103.232	102.286	0.286195	0.617188
O00217	NDUFS8	NADH dehydrogenase [ubiquinone] iron-sulfur protein 8, mitochondrial	0.97195	0.241452	100.922	101.727	96.5954	94.0593	95.9917	101.425	102.532	103.941	101.928	-0.0410456	0.617169
Q9Y6Y0	IVNS1ABP	Influenza virus NS1A-binding protein	1.23401	0.241571	80.4911	83.3009	92.226	141.291	67.9299	68.2604	72.3924	92.7218	101.151	0.303359	0.616956
Q9P0P0	RNF181	E3 ubiquitin-protein ligase RNF181	1.29288	0.241571	156.941	94.379	77.3967	123.025	78.9583	67.1487	131.76	79.3487	79.5439	0.370588	0.616955
Q12968	NFATC3	Nuclear factor of activated T-cells, cytoplasmic 3	1.45211	0.241594	173.4	85.7	90.8		51.2	45.9	110.7	111.7	82.1	0.538149	0.616913
Q15555	MAPRE2	Microtubule-associated protein RP/EB family member 2	1.1009	0.241607	103.526	90.949	91.2306	119.425	100.804	98.4577	91.5122	89.5412	79.686	0.138679	0.61689
Q9NRW3	APOBEC3C	DNA dC->dU-editing enzyme APOBEC-3C	0.768303	0.241948	127.982	64.6519	65.4229	72.0307	124.458	88.5522	148.468	89.5434	86.019	-0.380254	0.616277
A0A0A6YYJ8	LUC7L2	Putative RNA-binding protein Luc7-like 2	1.24717	0.24201	112.809	112.712	97.3867	106.211	74.98	69.3541	143.461	69.5481	72.749	0.318662	0.616167
Q66K74	MAP1S	Microtubule-associated protein 1S	1.05747	0.242108	101.467	107.68	114.513	101.241	101.157	98.7755	89.6641	108.612	104.056	0.0806109	0.61599
P46060	RANGAP1	Ran GTPase-activating protein 1	0.932512	0.242114	98.1478	103.138	105.842	94.492	101.475	108.337	95.5486	122.997	110	-0.100806	0.615981
Q02818	NUCB1	Nucleobindin-1	1.07376	0.242126	103.679	117.338	119.274	95.6831	95.8281	96.0432	102.389	102.281	110.993	0.102669	0.615959
Q13838	DDX39B	Spliceosome RNA helicase DDX39B	0.953613	0.24221	100.529	102.194	104.067	91.0426	101.258	104.588	96.6787	108.646	110.312	-0.0685249	0.615808
Q9Y5Y5	PEX16	Peroxisomal membrane protein PEX16	1.1806	0.242291	119.1	99.4	95.8		75.4	65	112	99.2	92.1	0.239523	0.615662
O75607	NPM3	Nucleoplasmin-3	0.839952	0.242714	115.204	103.369	117.136	74.1554	101.075	96.9692	118.706	137.182	156.02	-0.251621	0.614904
P29372	MPG	DNA-3-methyladenine glycosylase	0.712079	0.24276	73.3385	63.9222	61.8397	76.8424	155.278	128.569	77.1412	61.1154	62.2924	-0.48989	0.614822
Q9BWS9	CHID1	Chitinase domain-containing protein 1	0.923831	0.242818	109.009	111.878	119.221	85.3585	117.385	115.435	114.402	107.747	120.713	-0.114299	0.61472
Q13946	PDE7A	High affinity cAMP-specific 3',5'-cyclic phosphodiesterase 7A	1.35189	0.242945	87.7	149.4	127.1		97.5	31.1	114	115.4	91	0.434981	0.614491
P20340	RAB6A	Ras-related protein Rab-6A	1.17024	0.243027	128.7	100.9	95		81.6	78.4	117.8	97.6	86.9	0.226799	0.614345
P21817	RYR1	Ryanodine receptor 1	0.869408	0.243086	92.2	72.9	100		109.7	90.3	83.7	107.1	117.4	-0.201894	0.614241
P55268	LAMB2	Laminin subunit beta-2	1.14934	0.243282	96.5	98.9	114.3		83.4	72.4	84.3	94.1	114.9	0.2008	0.613891
Q9H3N1	TMX1	Thioredoxin-related transmembrane protein 1	1.23869	0.243397	147.291	118.264	121.779	102.455	75.2899	60.436	95.6998	139.808	123.026	0.308821	0.613685
Q6UW56	ATRAID	All-trans retinoic acid-induced differentiation factor	1.2965	0.243591	155.2	101.2	94.9		68	59.4	115.7	112.7	95.8	0.374624	0.613339
Q96EY1	DNAJA3	DnaJ homolog subfamily A member 3, mitochondrial	1.05144	0.243651	98.4185	110.734	109.194	106.282	93.6977	96.3659	101.497	102.729	110.528	0.0723646	0.613232
Q6NSJ2	PHLDB3	Pleckstrin homology-like domain family B member 3	1.24407	0.243904	137.4	103.9	94.3		76	66.6	128.1	93.1	85.8	0.315066	0.612781
Q99436	PSMB7	Proteasome subunit beta type-7	0.917821	0.244397	96.8348	106.727	111.783	90.4423	103.32	104.639	99.2529	120.906	124.533	-0.123716	0.611905
P39748	FEN1	Flap endonuclease 1	0.927038	0.244439	78.7051	90.8799	93.2765	100.227	106.698	101.042	86.1825	94.2352	101.425	-0.1093	0.61183
O95573	ACSL3	Fatty acid CoA ligase Acsl3	0.933453	0.244489	96.2338	97.0186	100.06	100.144	117.815	111.929	89.4651	102.12	105.553	-0.0993509	0.611741
Q9HC38	GLOD4	Glyoxalase domain-containing protein 4	1.0239	0.244751	97.1548	97.0573	95.4982	100.854	96.3752	99.591	95.1084	91.6003	94.1339	0.0340779	0.611275
A0A0A0MTL6	RIPOR1	Rho family-interacting cell polarization regulator 1	0.838367	0.24481	82.1	94	90.4		126.6	132.8	88.5	88.8	93.1	-0.254347	0.611171
A0A1B0GV05	RAP1GAP2	Rap1 GTPase-activating protein 2	0.497145	0.244842	57.4	54.4	53.6		205.5	165.9	93.4	40.3	49.4	-1.00826	0.611115
A0A804HJ86	UBA5	Ubiquitin-like modifier-activating enzyme 5	0.91104	0.245268	90.3776	93.0329	94.0163	97.8677	112.505	122.733	91.4594	96.5733	91.6561	-0.134414	0.610359
Q15057	ACAP2	Arf-GAP with coiled-coil, ANK repeat and PH domain-containing protein 2	0.872575	0.245474	92.3075	113.67	114.569	92.52	106.474	103.101	100.515	137.056	144.589	-0.196649	0.609994
Q53EQ6	TIGD5	Tigger transposable element-derived protein 5	1.24142	0.245504	124.999	154.587	140.624	125.547	71.0323	69.5917	155.141	111.701	142.065	0.311986	0.609941
O00429	DNM1L	Dynamin-1-like protein	1.06358	0.245546	110.122	98.2039	98.2039	107.742	104.212	105.493	96.825	94.461	85.8915	0.0889332	0.609866
F8VXC8	SMARCC2	SWI/SNF complex subunit SMARCC2	0.933625	0.245617	83.7182	75.5876	84.433	99.8044	93.0997	90.7766	97.1203	92.0275	86.9347	-0.0990847	0.609741
O43752	STX6	Syntaxin-6	0.89012	0.246229	85.4499	97.0296	96.5305	93.9718	118.891	123.184	80.7582	105.415	95.5322	-0.167928	0.60866
O95340	PAPSS2	Bifunctional 3'-phosphoadenosine 5'-phosphosulfate synthase 2	1.17162	0.246508	127.669	138.386	138.968	104.531	81.3075	87.4813	104.721	133.843	136.289	0.228508	0.608169
O14657	TOR1B	Torsin-1B	1.52951	0.246608	156.377	88.1249	80.931	115.57	43.433	34.081	161.682	68.2518	52.9649	0.613066	0.607992
A0A2U3TZH3	EEF1A2	Elongation factor 1-alpha	1.11906	0.246616	115.453	107.914	103.649	104.357	112.08	113.667	98.3925	82.7212	74.9846	0.162293	0.607978
A0A0A6YYL6	RPL17-C18orf32	60S ribosomal protein L17	0.838513	0.247338	90.1308	87.3606	87.4595	79.9602	134.751	125.55	93	81.1276	79.7425	-0.254096	0.606709
O75694	NUP155	Nuclear pore complex protein Nup155	1.05397	0.247393	107.31	109.387	111.777	103.437	102.843	102.947	89.1305	106.894	110.426	0.0758391	0.606612
Q14315	FLNC	Filamin-C	1.07698	0.247414	97.9847	96.3995	99.5699	108.523	85.105	82.2319	100.561	92.7338	106.505	0.106991	0.606576
P34897	SHMT2	Serine hydroxymethyltransferase, mitochondrial	1.07962	0.247416	99.527	115.644	119.621	101.974	99.6316	105.492	85.9218	105.283	109.365	0.110525	0.606572
P29350	PTPN6	Tyrosine-protein phosphatase non-receptor type 6	1.16972	0.247445	147.992	123.039	120.049	94.2183	84.6324	80.6078	123.614	110.735	119.014	0.226168	0.606521
H3BTZ6	AMDHD2	N-acetylglucosamine-6-phosphate deacetylase (Fragment)	0.83225	0.24764	84.2	95.1	89.5		138.2	127	86.5	95.7	90.9	-0.264912	0.60618
Q9ULM6	CNOT6	CCR4-NOT transcription complex subunit 6	1.13021	0.247996	114.76	96.2573	103.537	109.822	88.3706	83.6184	125.579	84.6295	87.1573	0.176596	0.605556
Q9BPZ3	PAIP2	Polyadenylate-binding protein-interacting protein 2	0.896647	0.248121	92.529	101.264	108.598	95.4586	110.431	114.852	82.931	118.951	127.47	-0.157388	0.605337
A0A8C8NWT4	PLEKHG3	Pleckstrin homology domain-containing family G member 3	0.797699	0.248129	91.5237	73.2749	76.3474	67.8215	136.401	104	108.376	68.8989	66.4781	-0.326083	0.605322
G3V4K3	VIPAS39	Spermatogenesis-defective protein 39 homolog	0.913885	0.248333	79.9588	93.3965	91.0139	106.658	111.313	102.164	87.0112	97.3992	109.598	-0.129916	0.604966
Q7Z2Z1	TICRR	Treslin	0.837252	0.248361	87.8563	82.8689	80.0874	86.0763	129.674	121.522	98.5986	85.3626	67.8105	-0.256265	0.604916
Q6PI47	KCTD18	BTB/POZ domain-containing protein KCTD18	1.25019	0.248391	110.6	109.2	110.4		62.4	51.5	102.8	110.2	113.3	0.322147	0.604864
P78536	ADAM17	Disintegrin and metalloproteinase domain-containing protein 17	0.811507	0.248423	73.9	95.4	89.1		135.1	130.5	81	97.1	87	-0.301325	0.604808
Q96CD2	PPCDC	Phosphopantothenoylcysteine decarboxylase	0.830176	0.248445	85.7811	96.6109	113.553	90.6727	110.229	112.909	73.3428	135.856	149.795	-0.268511	0.604769
P28289	TMOD1	Tropomodulin-1	0.75517	0.248684	75.6688	67.0182	74.9083	96.8335	140.405	150.197	65.9725	79.186	84.6996	-0.405127	0.604352
B4DUA7	MED29	Mediator of RNA polymerase II transcription subunit 29	1.41581	0.248846	96.7493	69.5752	71.7616	168.14	49.2727	54.973	104.324	59.0335	91.049	0.501627	0.60407
A0A096LP25	AAK1	AP2-associated protein kinase 1	1.12282	0.2496	97.097	86.2076	90.5633	125.869	96.6432	82.85	95.7358	80.0369	89.7466	0.167133	0.602756
P30040	ERP29	Endoplasmic reticulum resident protein 29	1.19199	0.249874	119.698	104.337	92.1644	108.406	86.0781	91.1983	129.938	71.6834	66.37	0.253376	0.602279
P29317	EPHA2	Ephrin type-A receptor 2	1.13201	0.249989	99.4915	121.961	122.065	108.686	81.7251	83.2927	96.4607	116.422	121.438	0.178882	0.602078
Q9BWG4	SSBP4	Single-stranded DNA-binding protein 4	1.50535	0.250149	171.001	80.0198	71.7073	133.031	53.5293	46.4955	153.737	70.4284	54.26	0.590097	0.601801
P55212	CASP6	Caspase-6	1.19961	0.250165	129.204	117.163	103.494	99.5855	68.7789	63.5716	126.167	111.088	98.7204	0.262566	0.601774
H0YDT6	EIF3F	Eukaryotic translation initiation factor 3 subunit F	1.07287	0.250172	110.493	103.14	102.234	109.64	87.4274	89.6433	99.917	105.96	112.81	0.101475	0.601761
Q92966	SNAPC3	snRNA-activating protein complex subunit 3	0.819998	0.250363	82.3799	68.4373	71.809	95.403	117.555	114.001	114.001	63.5163	75.7275	-0.286308	0.60143
J3KQV8	SYNJ1	Phosphoinositide 5-phosphatase	1.14695	0.250436	108.6	99.5	113		80	72.7	92.7	113.1	108.1	0.197802	0.601304
Q9UM54	MYO6	Unconventional myosin-VI	0.868095	0.250453	86.5809	80.1433	78.0908	94.7031	120.355	114.104	96.1907	80.7031	77.531	-0.204075	0.601274
Q96JP0	FEM1C	Protein fem-1 homolog C	0.81788	0.250471	80.8095	84.9828	74.0754	83.8303	131.363	126.905	78.1538	72.1784	86.1209	-0.290039	0.601243
O76031	CLPX	ATP-dependent Clp protease ATP-binding subunit clpX-like, mitochondrial	1.2322	0.25074	89.4352	84.8192	77.483	136.905	86.7151	81.2748	101.8	61.6567	62.8107	0.301236	0.600777
P61081	UBE2M	NEDD8-conjugating enzyme Ubc12	1.21642	0.250822	152.706	128.874	125.26	97.2278	78.1603	73.5294	145.477	105.833	114.981	0.282646	0.600634
A0A1B0GVI3	KRT10	Keratin, type I cytoskeletal 10	0.8547	0.250835	106.739	100.636	103.632	97.6106	135.92	87.8763	104.852	157.001	111.954	-0.22651	0.600612
Q9BW61	DDA1	DET1- and DDB1-associated protein 1	1.29499	0.250902	119.888	108	89.0705	109.748	85.8698	68.769	144.214	58.6182	54.4116	0.372944	0.600496
Q5SRH9	TTC39A	Tetratricopeptide repeat protein 39A	1.22521	0.251032	138.7	103.8	93.6		65.8	93.1	124.9	84.1	89.3	0.293031	0.600271
Q7Z7F0	KHDC4	KH homology domain-containing protein 4	0.898725	0.251167	97.8822	97.0699	96.156	84.1295	121.642	120.424	99.5068	90.9776	89.353	-0.154049	0.600037
A0A6Q8PH84	RAB7A	Ras-related protein Rab-7a	0.940328	0.251172	100.206	101.626	99.4957	92.8971	115.318	114.506	98.38	96.6559	99.1914	-0.088764	0.600029
Q9BUR4	WRAP53	Telomerase Cajal body protein 1	0.876368	0.251708	88.5955	90.3874	94.3692	81.6737	124.133	119.256	94.1701	87.0028	81.8264	-0.190392	0.599103
Q9BV29	CCDC32	Coiled-coil domain-containing protein 32	0.739492	0.252037	77.9	83.4	82.2		142.6	156.8	97.1	75.9	76.4	-0.435393	0.598537
O14681	EI24	Etoposide-induced protein 2.4 homolog	1.31074	0.252181	151.1	99	89.8		73.8	61	131.1	88.1	78.2	0.390377	0.598287
Q96HS1	PGAM5	Serine/threonine-protein phosphatase PGAM5, mitochondrial	1.17521	0.252301	125.893	85.559	78.9136	111.835	77.5292	69.0379	106.51	86.7588	87.9587	0.232924	0.59808
Q9H583	HEATR1	HEAT repeat-containing protein 1	0.90668	0.252305	96.2496	104.845	108.665	97.1164	113.016	115.563	85.6377	126.493	120.232	-0.141335	0.598074
Q16698	DECR1	2,4-dienoyl-CoA reductase [(3E)-enoyl-CoA-producing], mitochondrial	0.841805	0.252724	91.4337	85.3252	78.441	78.2743	123.431	123.14	98.2209	78.7319	71.6538	-0.248441	0.597354
E9PHI4	SUN1	SUN domain-containing protein 1	1.22964	0.252832	95.5362	89.7306	82.9858	150.836	100.659	91.0966	96.3899	68.8987	68.9841	0.298234	0.597168
A0A590UJD9	DLG1	Disks large homolog 1	1.16573	0.253619	97.6998	114.098	101.849	104.701	88.0187	75.3741	129.509	79.2267	76.4607	0.221236	0.595819
Q9UHB6	LIMA1	LIM domain and actin-binding protein 1	1.06095	0.253671	107.023	103.078	101.966	100.65	104.494	107.529	98.2228	88.6129	87.3991	0.0853569	0.59573
Q2NL82	TSR1	Pre-rRNA-processing protein TSR1 homolog	0.898362	0.253771	85.582	92.6899	84.8136	96.1534	118.912	110.748	100.95	85.1018	84.1413	-0.154632	0.595558
P43121	MCAM	Cell surface glycoprotein MUC18	0.828527	0.25395	83.6857	93.3745	97.6333	93.8979	93.4809	77.9363	99.2303	144.374	141.073	-0.27138	0.595252
Q9NPF5	DMAP1	DNA methyltransferase 1-associated protein 1	0.789517	0.254156	96.4134	91.6613	89.6549	65.769	147.207	144.778	91.1333	83.6357	77.0884	-0.340958	0.5949
Q96DC7	TMCO6	Transmembrane and coiled-coil domain-containing protein 6	0.672535	0.254489	90	70.6	66.3		165.2	163.4	92.8	70.8	70.1	-0.572318	0.594331
Q9BXL8	CDCA4	Cell division cycle-associated protein 4	0.85565	0.254512	107.324	110.414	127.647	83.1213	110.77	123.012	94.3687	148.328	149.516	-0.224907	0.594291
Q9NV56	MRGBP	MRG/MORF4L-binding protein	0.697057	0.254629	88.4254	65.5321	61.4304	58.4503	150.714	138.123	95.5795	53.3223	53.3223	-0.520652	0.594092
O00214	LGALS8	Galectin-8	1.07608	0.254836	104.2	93.1	103.7		102.4	87.3	84.1	101.6	90.8	0.10578	0.593739
P24386	CHM	Rab proteins geranylgeranyltransferase component A 1	0.874287	0.254907	99.1357	81.5072	80.8139	97.0112	113.694	113.991	120.231	81.012	83.5869	-0.193821	0.593619
P49821	NDUFV1	NADH dehydrogenase [ubiquinone] flavoprotein 1, mitochondrial	0.899689	0.254913	83.8614	81.3007	78.74	97.8489	109.376	106.724	95.1099	83.6784	79.9289	-0.152501	0.593608
Q92466	DDB2	DNA damage-binding protein 2	0.917067	0.254994	69.8452	79.2391	75.412	96.1026	85.5017	91.7643	78.1084	93.5909	88.0241	-0.1249	0.59347
H7BYT1	CSNK1D	Casein kinase I isoform delta	0.915139	0.255016	106.155	98.1881	94.7738	93.181	119.502	120.019	109.88	96.6362	89.8075	-0.127937	0.593432
O43181	NDUFS4	NADH dehydrogenase [ubiquinone] iron-sulfur protein 4, mitochondrial	0.663457	0.255148	89.4349	106.948	131.278	72.5265	101.868	99.9959	83.6864	214.296	254.134	-0.591924	0.593207
Q9UK61	TASOR	Protein TASOR	1.15302	0.25545	113.242	138.122	139.796	83.2661	105.99	103.089	86.0195	112.796	106.437	0.205412	0.592695
P15291	B4GALT1	Beta-1,4-galactosyltransferase 1	1.05273	0.255524	95.1103	111.08	106.127	108.613	99.6586	98.0414	91.6738	106.835	103.6	0.0741317	0.592568
P42785	PRCP	Lysosomal Pro-X carboxypeptidase	1.23108	0.255624	85.7257	73.8193	75.6629	136.169	75.5092	73.7425	90.6418	77.8137	59.3781	0.299922	0.592398
O75832	PSMD10	26S proteasome non-ATPase regulatory subunit 10	1.18849	0.255748	129.787	112.434	98.6754	104.577	88.4074	89.1261	138.104	77.934	74.9563	0.249133	0.592188
Q8IZV5	RDH10	Retinol dehydrogenase 10	1.35892	0.25578	97.8846	85.8458	68.9284	159.738	75.3806	64.1286	121.884	57.4403	60.5091	0.442462	0.592133
P13646	KRT13	Keratin, type I cytoskeletal 13	0.744125	0.255836	55.4055	50.4823	49.3101	120.574	118.391	111.592	95.0255	69.0029	69.2373	-0.426383	0.592038
Q9H0D6	XRN2	5'-3' exoribonuclease 2	0.940038	0.256981	99.5211	100.445	100.754	91.4908	110.408	116.159	100.24	102.397	92.3317	-0.0892084	0.590099
P21579	SYT1	Synaptotagmin-1	1.21913	0.257374	134.2	105.3	97.2		84.4	81	133.6	80.4	80.9	0.285855	0.589435
P48380	RFX3	Transcription factor RFX3	0.868916	0.257419	82.2	97.1	94.2		113.7	129.6	83	99.9	98.4	-0.202711	0.589359
O14732	IMPA2	Inositol monophosphatase 2	1.16992	0.25765	111.594	142.102	145.657	112.672	95.7666	103.91	77.7601	131.894	137.743	0.226407	0.58897
P14678	SNRPB	Small nuclear ribonucleoprotein-associated proteins B and B'	1.22809	0.25785	123.778	95.6302	84.6277	109.973	72.8	69.5909	132.03	78.8514	68.1239	0.296414	0.588632
H0YAV1	RRM2B	Ribonucleoside-diphosphate reductase subunit M2 B (Fragment)	0.848796	0.257995	91.2836	104.731	113.962	79.0348	102.224	107.694	83.9901	139.945	139.034	-0.23651	0.588389
A0A804CD06	PTPA	Serine/threonine-protein phosphatase 2A activator	1.09426	0.25838	103.293	100.186	93.5847	114.856	94.2642	89.5073	113.874	91.0606	81.838	0.12996	0.587742
Q04323	UBXN1	UBX domain-containing protein 1	0.9266	0.258544	97.3629	96.9568	94.8247	97.535	111.272	117.769	109.851	92.6927	90.0531	-0.109982	0.587466
Q01130	SRSF2	Serine/arginine-rich splicing factor 2	1.2827	0.258562	74.8091	110.193	106.96	143.937	63.9425	54.3331	129.412	79.6587	97.4404	0.359186	0.587435
Q96PU4	UHRF2	E3 ubiquitin-protein ligase UHRF2	0.747541	0.258953	86.1086	115.935	127.416	75.4169	110.069	89.3533	97.0906	189.813	190.687	-0.419776	0.586779
A0A8Q3WM32	PDE4DIP	Myomegalin	1.23821	0.25907	84.8967	88.7787	82.9557	156.075	91.1416	94.1797	73.5884	79.5801	78.1455	0.308258	0.586582
Q96K21	ZFYVE19	Abscission/NoCut checkpoint regulator	0.805732	0.259149	74.3558	101.722	113.708	85.9856	97.1611	101.298	80.7201	150.515	153.273	-0.311629	0.586451
Q99623	PHB2	Prohibitin-2	1.05064	0.259185	112.997	101.16	99.37	100.237	91.114	93.9987	103.05	104.542	99.569	0.0712748	0.58639
P25205	MCM3	DNA replication licensing factor MCM3	0.966305	0.259721	94.6333	106.551	101.703	95.7605	105.541	102.107	106.652	101.602	99.7841	-0.0494502	0.585493
Q5JU69	TOR2A	Torsin-2A	0.829096	0.259855	96.4695	106.79	111.837	64.5043	142.461	142.236	93.7773	95.0112	98.8252	-0.270389	0.585269
Q9HBD4	SMARCA4	SMARCA4 isoform 2	1.0509	0.260266	117.762	105.289	104.042	98.3732	102.795	94.6876	103.626	105.705	99.2609	0.0716233	0.584583
P78562	PHEX	Phosphate-regulating neutral endopeptidase PHEX	1.36276	0.260879	146.1	110.7	81.3		66.4	50.8	138.6	82.7	75	0.446528	0.583562
Q99856	ARID3A	AT-rich interactive domain-containing protein 3A	0.723252	0.260896	76.5787	103.91	123.248	65.8002	84.9585	92.1781	92.8227	173.656	195.057	-0.467429	0.583533
J3QRS3	MYL12A	Myosin regulatory light chain 12A	0.897318	0.260977	93.0398	96.5586	99.9738	86.8685	120.672	123.881	85.1744	97.3865	97.283	-0.156308	0.583398
Q9NSY1	BMP2K	BMP-2-inducible protein kinase	1.83018	0.260983	53.5059	75.345	74.253	258.644	75.2085	73.0246	39.3104	69.6805	58.1467	0.871986	0.583388
P0CJ79	ZNF888	Zinc finger protein 888	1.10194	0.261006	103.7	107.9	112.7		99.8	100	113.2	76.9	100.6	0.140041	0.58335
Q8WW22	DNAJA4	DnaJ homolog subfamily A member 4	1.11823	0.261475	90.1316	89.7435	107.983	109.566	90.7137	89.5494	65.7795	94.2064	104.005	0.16122	0.58257
Q9BYG3	NIFK	MKI67 FHA domain-interacting nucleolar phosphoprotein	0.941351	0.261507	103.033	103.656	102.41	90.4265	106.768	116.522	93.4871	109.57	104.174	-0.0871951	0.582517
A0A8Q3WK80	MAT2B	Methionine adenosyltransferase 2 subunit beta	1.15674	0.261705	99.0073	83.802	78.7912	120.951	87.7761	88.5537	98.489	67.3008	71.2749	0.210062	0.582188
Q05932	FPGS	Folylpolyglutamate synthase, mitochondrial	1.41749	0.262212	226.198	131.885	109.904	83.7198	74.3769	67.3481	161.405	99.4247	83.9615	0.503339	0.581347
P0CG39	POTEJ	POTE ankyrin domain family member J	0.908642	0.262377	100.137	112.285	109.549	92.8183	111.738	122.791	89.5214	118.523	128.044	-0.138217	0.581074
P17900	GM2A	Ganglioside GM2 activator	1.05579	0.263186	92.0031	108.429	100.411	106.776	96.8917	105.398	88.9722	95.034	96.3051	0.0783219	0.579737
Q86YV5	PRAG1	Inactive tyrosine-protein kinase PRAG1	0.732128	0.263507	66.513	74.6382	70.4811	76.615	150.694	138.789	67.0799	63.5842	71.9928	-0.449832	0.579208
P30041	PRDX6	Peroxiredoxin-6	0.866921	0.263928	88.4452	94.8006	104.016	92.8259	111.007	106.982	72.5569	129.225	128.272	-0.206028	0.578514
O75131	CPNE3	Copine-3	1.08575	0.263951	101.807	111.016	109.89	112.858	91.3707	88.1988	92.3938	113.676	115.825	0.118691	0.578477
A0A804HLI0	KALRN	Non-specific serine/threonine protein kinase	0.812299	0.264033	98.5	78.5	91.4		121.6	122.7	68.7	98.8	138.9	-0.299916	0.578342
P13647	KRT5	Keratin, type II cytoskeletal 5	0.843487	0.26511	95.6162	98.0537	110.684	60.5659	99.2725	82.9856	112.679	138.494	107.361	-0.245562	0.576574
P27694	RPA1	Replication protein A 70 kDa DNA-binding subunit	0.946063	0.26513	96.1946	88.9218	87.9521	96.8272	103.273	106.376	98.5219	92.7037	87.8551	-0.0799925	0.576542
Q9Y2H0	DLGAP4	Disks large-associated protein 4	1.05096	0.265686	110.772	98.5227	106.337	95.4332	99.7899	90.3917	94.4044	100.318	104.014	0.0717028	0.575631
J3KQ26	ARMC5	Armadillo repeat-containing protein 5	0.920316	0.265695	97.6782	112.588	118.946	96.1492	113.793	126.73	97.5686	115.548	124.098	-0.119799	0.575617
Q8NHZ8	CDC26	Anaphase-promoting complex subunit CDC26	0.761769	0.265807	76.1134	69.4618	74.9731	84.1081	143.2	139.019	85.2356	70.6021	61.8599	-0.392574	0.575434
P61764	STXBP1	Syntaxin-binding protein 1	0.836248	0.26603	115.996	107.422	120.65	82.1232	102.645	98.97	116.363	151.15	167.93	-0.257997	0.575069
Q9BXH1	BBC3	Bcl-2-binding component 3, isoforms 1/2	1.69866	0.266226	237.1	71	74.2		66.6	60.5	119.7	61.8	66.5	0.764396	0.57475
Q9BVW5	TIPIN	TIMELESS-interacting protein	1.15569	0.266248	80.3194	86.0004	88.7097	131.781	88.1853	90.2829	83.5532	76.2991	80.0573	0.20875	0.574714
A0A3F2YNX7	ENOSF1	L-fuconate dehydratase	0.854186	0.266606	84.5647	93.5414	102.722	95.9384	131.692	138.731	77.3221	94.9695	108.639	-0.227379	0.574131
Q9NS86	LANCL2	LanC-like protein 2	1.16988	0.266787	152.704	106.694	101.288	93.3625	97.2054	93.785	114.749	102.612	76.7934	0.226361	0.573836
Q9Y6H1	CHCHD2	Coiled-coil-helix-coiled-coil-helix domain-containing protein 2	1.12753	0.267164	101.498	115.329	110.951	89.9555	115.429	101.995	92.2437	76.82	76.621	0.173161	0.573222
G5E9T8	GOSR1	Golgi SNAP receptor complex member 1 (Fragment)	1.03916	0.267265	102.982	110.138	108.997	105.337	101.945	94.7892	103.501	102.464	111.486	0.0554109	0.573057
Q9H0G5	NSRP1	Nuclear speckle splicing regulatory protein 1	0.761149	0.26731	86.1355	73.0553	69.3734	81.413	142.332	143.979	91.5613	63.3662	67.8232	-0.39375	0.572985
A0A2R8YEL6	GCLC	Glutamate--cysteine ligase (Fragment)	1.13678	0.267341	127.244	96.4895	91.7731	109.033	86.0741	78.9995	120.17	91.8713	89.7097	0.184948	0.572934
Q9Y3A3	MOB4	MOB-like protein phocein	1.14003	0.267401	146.391	109.793	106.927	99.6573	87.195	88.1872	121.809	109.132	101.085	0.189074	0.572836
P16435	POR	NADPH--cytochrome P450 reductase	1.03974	0.267749	101.308	101.112	99.9338	106.49	104.646	104.744	93.0622	93.9457	95.1237	0.0562235	0.572273
Q9UBB4	ATXN10	Ataxin-10	0.896581	0.268127	122.13	92.3627	91.8349	81.6239	110.73	96.7961	123.924	107.985	101.441	-0.157494	0.571659
O43824	GTPBP6	Putative GTP-binding protein 6	1.08597	0.268499	98.5525	92.9602	86.7262	111.152	93.9687	94.2437	99.4693	81.5006	79.0254	0.118981	0.571057
A0A494C1J1	SPECC1L	Cytospin-A	1.16541	0.268511	93.1813	88.1611	84.1098	123.187	99.6106	98.906	85.9593	66.9355	65.4383	0.220832	0.571038
Q96FN4	CPNE2	Copine-2	1.11418	0.268562	122.115	116.026	110.577	92.6701	83.8676	82.7992	113.782	102.671	112.073	0.155987	0.570956
Q16533	SNAPC1	snRNA-activating protein complex subunit 1	0.766604	0.268965	89.4	73.4	81.9		95.4	80.4	165.4	99.2	91.6	-0.383447	0.570304
J3KPZ4	C1D	Nuclear nucleic acid-binding protein C1D	1.215	0.268971	136.679	96.2771	78.3206	111.418	63.4206	65.3309	114.234	98.7604	93.1251	0.280957	0.570295
A0A075B6F9	NOSIP	Nitric oxide synthase-interacting protein	1.18828	0.269207	108.744	104.228	88.6129	107.8	93.5045	92.0935	121.819	64.155	59.0753	0.24888	0.569914
Q96RY5	CRAMP1	Protein cramped-like	0.841286	0.269347	102.1	75.5	71		125.2	108.2	89.1	89	81	-0.249332	0.569688
Q9UDY8	MALT1	Mucosa-associated lymphoid tissue lymphoma translocation protein 1	0.780357	0.269758	81	89.3	83.8		147.6	140.9	87.3	81.5	85.4	-0.357793	0.569026
A2A274	ACO2	Aconitate hydratase, mitochondrial	1.11703	0.269903	99.153	117.795	118.399	106.69	82.6275	85.3481	92.704	111.849	122.127	0.159668	0.568792
Q9BV38	WDR18	WD repeat-containing protein 18	1.12331	0.269944	106.999	90.7926	83.5182	109.764	99.7246	91.4372	99.2642	74.4021	70.3505	0.16776	0.568726
Q13829	TNFAIP1	BTB/POZ domain-containing adapter for CUL3-mediated RhoA degradation protein 2	0.853264	0.270011	85.4	92.5	96.1		133.3	123.3	79.6	99.8	99.2	-0.228937	0.568619
Q9H7D0	DOCK5	Dedicator of cytokinesis protein 5	0.811324	0.270021	89.4	87.5	79.3		73	78.3	123.8	127.8	123.4	-0.301649	0.568603
P11177	PDHB	Pyruvate dehydrogenase E1 component subunit beta, mitochondrial	1.07579	0.270097	84.4525	101.228	101.707	104.736	99.0232	97.8728	92.0254	87.52	79.1802	0.1054	0.56848
Q53GQ0	HSD17B12	Very-long-chain 3-oxoacyl-CoA reductase	0.897801	0.270224	125.806	117.822	98.432	77.376	117.936	126.148	113.145	116.339	110.408	-0.155533	0.568276
Q96C36	PYCR2	Pyrroline-5-carboxylate reductase 2	1.08155	0.270378	105.6	107.8	107.3		86.7	90.3	97.1	107	113.1	0.113095	0.568029
Q6ZNE5	ATG14	Beclin 1-associated autophagy-related key regulator	0.843718	0.270492	89.7686	90.9357	91.5192	96.9054	139.856	140.148	87.1426	87.2399	92.4918	-0.245167	0.567845
Q86UP2	KTN1	Kinectin	1.13167	0.271178	98.6556	87.9634	88.0533	115.132	97.5774	90.6589	101.8	72.3295	68.1964	0.178454	0.566746
A0A6Q8PF05	MSI2	RNA-binding protein Musashi homolog 2 (Fragment)	1.07372	0.271187	89.3802	92.9925	96.4195	117.258	91.9737	93.1777	87.5278	92.7146	95.6785	0.102617	0.566732
Q99871	HAUS7	HAUS augmin-like complex subunit 7	1.43961	0.271438	88.8173	78.0733	72.2635	181.188	100.676	99.243	80.1425	40.8273	44.0903	0.525679	0.56633
F5GY05	FAM120B	Constitutive coactivator of peroxisome proliferator-activated receptor gamma	0.870021	0.271538	101.7	85	78.9		114.2	94.5	123.8	87.7	88.6	-0.200878	0.566169
P49754	VPS41	Vacuolar protein sorting-associated protein 41 homolog	0.897362	0.271644	80.5	98.4	100		97.4	91	95.6	119.6	114.4	-0.156239	0.565999
P05455	SSB	Lupus La protein	0.961249	0.272076	92.7374	95.2809	96.3569	100.034	98.4112	105.748	90.7809	103.889	101.052	-0.0570183	0.56531
Q8NAF0	ZNF579	Zinc finger protein 579	0.917982	0.27219	87.0241	90.8547	92.328	93.7006	117.866	106.472	95.9622	84.5685	90.6583	-0.123463	0.565129
Q9BV36	MLPH	Melanophilin	0.872863	0.272219	83.0435	103.438	113.583	67.2924	114.211	99.9869	86.0766	106.576	119.231	-0.196173	0.565082
Q8NBL1	POGLUT1	Protein O-glucosyltransferase 1	1.29877	0.272281	91.3618	85.2605	68.9374	156.292	94.7691	83.9927	93.1051	61.8852	53.0105	0.377143	0.564983
P35580	MYH10	Myosin-10	0.919572	0.272515	89.6982	109.549	111.65	91.902	109.444	102.302	96.0001	121.313	118.477	-0.120966	0.56461
O94906	PRPF6	Pre-mRNA-processing factor 6	0.957441	0.272566	103.774	90.9244	91.9952	96.9433	106.792	100.854	102.509	95.5971	95.1104	-0.0627443	0.564528
P52789	HK2	Hexokinase-2	0.909797	0.272572	109.238	116.815	117.041	82.017	115.684	109.238	105.732	123.826	129.593	-0.136383	0.564519
Q9NWV4	CZIB	CXXC motif containing zinc binding protein	0.940111	0.27264	79.4674	85.8285	82.8784	98.222	97.7209	94.863	82.7862	90.7145	94.4943	-0.0890972	0.56441
Q15526	SURF1	Surfeit locus protein 1	0.916635	0.272972	98.8	94.6	97.1		115.3	120.7	91.9	103.4	96.9	-0.125581	0.563882
O60826	CCDC22	Coiled-coil domain-containing protein 22	1.19415	0.273175	95.4893	87.8122	81.6015	123.638	91.4351	85.5695	108.428	60.4679	60.813	0.255982	0.563559
P82094	TMF1	TATA element modulatory factor	1.10883	0.273202	98.8938	95.5593	90.9861	111.015	101.847	93.368	102.228	80.0297	69.4543	0.149039	0.563516
Q8NHU6	TDRD7	Tudor domain-containing protein 7	1.20777	0.273242	132.2	95.5	97.6		77.6	69.8	125.3	91.8	84.4	0.272342	0.563453
Q5T280	SPOUT1	Putative methyltransferase C9orf114	0.853574	0.273348	121.195	90.6998	95.8571	87.21	99.3326	92.2694	133.751	149.672	103.369	-0.228411	0.563284
O75643	SNRNP200	U5 small nuclear ribonucleoprotein 200 kDa helicase	0.956041	0.273395	101.27	104.46	105.387	97.2511	111.356	108.474	94.5803	112.179	107.342	-0.064856	0.56321
H0YIV9	H0YIV9	Glu-AdT subunit C (Fragment)	0.76717	0.273824	87.2	74.7	72.9		130.2	120	126.8	68.5	64.6	-0.382382	0.562529
Q9NZZ3	CHMP5	Charged multivesicular body protein 5	0.896346	0.273882	92.6432	110.447	115.392	95.4792	107.589	107.589	95.2807	129.349	137.481	-0.157872	0.562436
O75044	SRGAP2	SLIT-ROBO Rho GTPase-activating protein 2	1.15032	0.274019	110.7	114.1	111.6		78.3	73.8	102.9	117.2	115.2	0.202037	0.562219
Q9H446	RWDD1	RWD domain-containing protein 1	0.73261	0.274153	74.7691	70.1525	85.2067	78.3264	162.083	144.319	55.1987	95.0421	69.6507	-0.448883	0.562006
Q9NSV4	DIAPH3	Protein diaphanous homolog 3	1.16654	0.274307	95.1975	90.9101	90.2101	140.126	95.8975	70.6106	86.5352	86.7977	106.397	0.222236	0.561763
Q9H6L2	TMEM231	Transmembrane protein 231	0.677074	0.274542	91.5	67.1	69.1		158.9	159.3	121.3	61.9	59.1	-0.562614	0.561392
P10301	RRAS	Ras-related protein R-Ras	0.928367	0.274659	103.855	93.5103	96.8902	93.9926	115.428	111.024	84.8045	105.903	105.596	-0.107233	0.561206
A0A6I8PTZ8	AGO1	Protein argonaute-1	1.16554	0.274701	76.0903	94.0526	92.1399	128.286	72.4313	71.8492	79.084	97.3789	98.1274	0.221	0.56114
Q9UDW3	ZMAT5	Zinc finger matrin-type protein 5	0.73766	0.27504	90.4	77.7	74		105.1	157	141.8	65.3	77.8	-0.438972	0.560604
Q9NXH9	TRMT1	tRNA (guanine(26)-N(2))-dimethyltransferase	0.928958	0.275079	108.374	92.7917	89.6752	94.6009	108.073	112.295	112.295	93.8976	92.088	-0.106314	0.560543
P10244	MYBL2	Myb-related protein B	0.622149	0.275097	73.1	62.3	58.3		159.3	153.6	110.4	46.2	49.4	-0.684667	0.560514
A0A804HHW6	RMND1	Required for meiotic nuclear division protein 1 homolog	0.728289	0.275174	85.1	78.7	74.7		150.4	158.1	79.8	80.2	77.3	-0.457418	0.560392
F8W8D3	SLBP	Histone RNA hairpin-binding protein	0.788912	0.275237	84.7	78.6	88		134.9	144.5	88	87.2	76.3	-0.342064	0.560293
Q9UPN9	TRIM33	E3 ubiquitin-protein ligase TRIM33	1.07008	0.275393	117.686	115.997	109.664	97.9518	96.2595	93.7264	117.052	102.17	106.287	0.0977244	0.560048
Q04637	EIF4G1	Eukaryotic translation initiation factor 4 gamma 1	1.06458	0.275477	111.254	111.465	114.84	105.481	100.709	99.4435	90.3744	113.364	116.316	0.0902806	0.559915
A6NM71	A6NM71	PRA1 family protein	0.857665	0.275527	81.5	95.9	99.3		122.2	120.5	72.4	109.4	113.2	-0.221513	0.559835
Q9NXK8	FBXL12	F-box/LRR-repeat protein 12	0.872914	0.275827	89.6254	95.5337	90.9272	95.6668	125.375	135.89	88.9244	92.6296	89.5253	-0.196088	0.559363
P12956	XRCC6	X-ray repair cross-complementing protein 6	0.931062	0.275829	97.7504	104.933	106.078	89.8669	112.533	114.302	88.9018	112.116	107.328	-0.103051	0.55936
U3KQL2	ACYP2	Acylphosphatase	1.43955	0.275906	218.453	127.431	115.134	79.2108	75.2289	72.456	175.655	68.4776	77.2784	0.525617	0.559239
Q9UKD2	MRTO4	mRNA turnover protein 4 homolog	0.90267	0.275934	91.0389	84.8124	82.3596	92.3704	114.341	112.549	89.7182	87.0766	81.7935	-0.147729	0.559195
P49368	CCT3	T-complex protein 1 subunit gamma	1.08675	0.275985	122.253	100.404	100.607	99.3212	88.209	87.9041	113.107	98.9811	97.8632	0.120022	0.559115
Q9BX68	HINT2	Adenosine 5'-monophosphoramidase HINT2	1.12767	0.276718	103.133	104.957	95.0665	106.165	94.7784	96.795	117.249	71.732	73.1724	0.17334	0.557962
P61956	SUMO2	Small ubiquitin-related modifier 2	1.30456	0.276932	113.41	96.0159	77.0563	119.973	66.9676	63.4888	141.937	60.7057	56.3572	0.383565	0.557627
Q8WWI1	LMO7	LIM domain only protein 7	1.45828	0.277019	189.6	88	88.4		54.5	45.1	124.2	110.8	83.7	0.544271	0.557491
P98171	ARHGAP4	Rho GTPase-activating protein 4	1.09921	0.277186	136.48	128.527	131.919	102.37	103.734	101.278	107.827	122.446	132.504	0.136469	0.557228
Q9UK97	FBXO9	F-box only protein 9	0.776144	0.277387	76.9	83.3	96.3		114	95.3	65.7	117.3	158.5	-0.365604	0.556914
Q969G3	SMARCE1	SWI/SNF-related matrix-associated actin-dependent regulator of chromatin subfamily E member 1	1.08887	0.277774	81.5909	101.359	99.2145	115.277	99.2145	96.7901	85.6005	85.2275	89.4236	0.122826	0.556308
O43896	KIF1C	Kinesin-like protein KIF1C	1.13006	0.277783	98.2744	97.6427	86.9039	104.865	102.335	92.9501	98.6354	73.3674	61.5456	0.176397	0.556294
Q92585	MAML1	Mastermind-like protein 1	0.84077	0.27814	88.3	98.1	90.6		114.8	146.7	79.7	102.2	105.7	-0.250217	0.555737
K7ELL7	PRKCSH	Glucosidase 2 subunit beta	1.06881	0.278143	98.2779	96.6896	100.164	89.8892	90.4355	77.2325	104.333	88.1523	90.1377	0.0960051	0.555732
Q8IWI9	MGA	MAX gene-associated protein	1.26913	0.278794	88.3702	90.7449	80.059	152.499	98.632	98.632	95.1549	59.281	53.7685	0.343839	0.554717
A0A6Q8PHG4	A0A6Q8PHG4	Tripartite motif-containing protein 2	1.28693	0.279153	143.9	110.6	96.6		72.8	58.9	144.2	85.2	93.6	0.363933	0.554158
O43933	PEX1	Peroxisome biogenesis factor 1	1.13284	0.279484	113.239	110.775	105.539	109.512	82.0291	70.0173	124.943	100.509	106.977	0.179944	0.553643
Q6ZVM7	TOM1L2	TOM1-like protein 2	0.889798	0.279569	93.2206	97.8315	90.4139	88.9971	117.478	130.008	96.3279	92.5189	84.099	-0.16845	0.553511
O00154	ACOT7	Cytosolic acyl coenzyme A thioester hydrolase	0.897186	0.279794	100.77	89.7038	83.2404	94.6007	100.574	102.729	130.247	90.3893	89.2142	-0.156521	0.553161
P53634	CTSC	Dipeptidyl peptidase 1	0.939045	0.279815	91.0465	97.1097	93.9803	103.049	101.119	108.845	86.4501	108.063	108.258	-0.0907335	0.55313
O14617	AP3D1	AP-3 complex subunit delta-1	0.932282	0.279904	95.6679	84.272	89.156	100.447	110.416	106.01	94.6145	98.062	86.3788	-0.101162	0.55299
P62316	SNRPD2	Small nuclear ribonucleoprotein Sm D2	0.740566	0.280048	80.4888	62.1508	58.2663	84.3526	132.612	127.012	117.255	53.7496	50.8588	-0.433301	0.552767
P62888	RPL30	60S ribosomal protein L30	1.18243	0.280271	146.847	96.7789	89.8661	96.2195	81.4721	80.8795	117.32	94.6063	79.9907	0.241752	0.552422
Q15771	RAB30	Ras-related protein Rab-30	1.22469	0.280328	92.5	123.1	125.5		94.1	76.5	61.4	100.9	131.3	0.292414	0.552333
Q9BQ39	DDX50	ATP-dependent RNA helicase DDX50	1.13418	0.280847	99.7274	86.7982	77.8339	118.001	86.5396	83.5228	99.555	84.9881	66.801	0.18165	0.551529
Q13257	MAD2L1	Mitotic spindle assembly checkpoint protein MAD2A	1.34467	0.280887	195.157	94.4205	89.9243	96.1114	73.2241	64.5528	131.675	94.4205	78.2556	0.427254	0.551468
H3BNC9	H3BNC9	40S ribosomal protein S17	0.80734	0.281021	92	81.9	87		131.2	137.8	115.5	78.6	75.5	-0.308752	0.551261
P78417	GSTO1	Glutathione S-transferase omega-1	1.10198	0.281083	105.365	93.6999	88.5786	118.105	80.1381	81.94	105.839	99.2005	93.1309	0.140099	0.551165
Q8N4J0	CARNMT1	Carnosine N-methyltransferase	1.22695	0.281277	99.1341	70.5918	71.3959	144.473	80.8831	78.6319	79.4359	78.9535	74.9335	0.295078	0.550865
Q86WX3	RPS19BP1	Active regulator of SIRT1	0.732211	0.281649	89.3281	75.9048	67.6962	83.9095	163.591	154.996	93.7704	63.5437	64.9923	-0.449669	0.550292
P61018	RAB4B	Ras-related protein Rab-4B	1.239	0.281694	109.185	87.6321	78.2303	144.926	75.5694	62.7971	119.297	70.8685	95.1713	0.309175	0.550222
Q07812	BAX	Apoptosis regulator BAX	0.886209	0.282203	93.3	90.5	85.2		116.5	120.1	95.6	86.4	87.3	-0.17428	0.549439
Q9BV86	NTMT1	N-terminal Xaa-Pro-Lys N-methyltransferase 1	0.93287	0.282366	96.4637	94.2759	93.5797	96.7848	114.265	115.06	93.5797	91.8891	95.867	-0.100253	0.549188
O95758	PTBP3	Polypyrimidine tract-binding protein 3	0.762161	0.282391	89.2	84.5	81.7		144.6	157.8	100.9	74.7	80.5	-0.391833	0.549149
Q9Y3D3	MRPS16	28S ribosomal protein S16, mitochondrial	0.962108	0.282605	108.035	101.192	98.6	94.9303	100.57	101.399	109.797	109.797	101.71	-0.0557296	0.54882
Q99707	MTR	Methionine synthase	1.09081	0.282933	97.0172	91.8517	92.8848	118.607	104.531	97.3929	89.1281	83.6809	84.0565	0.125399	0.548316
Q8IUF8	RIOX2	Ribosomal oxygenase 2	1.0734	0.282993	121.174	105.1	101.7	92.6688	97.0629	97.166	109.119	93.0444	93.4566	0.102188	0.548225
Q14019	COTL1	Coactosin-like protein	0.915112	0.283101	84.132	83.8449	85.3763	102.746	110.836	108.347	85.0891	91.5977	90.5448	-0.127979	0.548059
A8MXV4	NUDT19	Acyl-coenzyme A diphosphatase NUDT19	1.06836	0.283335	121.728	100.766	100.973	100.497	91.1145	99.209	110.417	99.0014	96.3033	0.0953997	0.5477
Q8IUC6	TICAM1	TIR domain-containing adapter molecule 1	1.24973	0.283838	84	142.3	126.5		81.5	72.8	72.7	127.6	115.9	0.321621	0.54693
Q8N9N2	ASCC1	Activating signal cointegrator 1 complex subunit 1	0.920538	0.283881	116.028	84.7417	90.4395	92.5369	109.398	94.3762	98.3128	107.637	111.366	-0.11945	0.546864
Q86W42	THOC6	THO complex subunit 6 homolog	1.22591	0.284141	102.71	84.1218	77.0324	127.017	101.154	82.7385	103.747	59.3954	51.5279	0.293852	0.546465
P62837	UBE2D2	Ubiquitin-conjugating enzyme E2 D2	0.790063	0.284212	106.98	98.2193	120.677	85.2063	97.8492	96.2451	101.181	162.876	192.243	-0.33996	0.546357
P09960	LTA4H	Leukotriene A-4 hydrolase	0.956587	0.28435	104.836	100.243	97.3846	97.4271	97.895	98.0992	103.612	108.409	114.534	-0.0640314	0.546146
Q9Y6D9	MAD1L1	Mitotic spindle assembly checkpoint protein MAD1	1.12476	0.28467	89.9017	101.035	100.571	120.893	76.2634	80.5312	83.964	106.787	110.777	0.169613	0.545658
Q8WVK7	SKA2	Spindle and kinetochore-associated protein 2	1.11578	0.285181	109.407	107.168	124.861	104.58	92.386	88.5785	80.5158	117.022	121.166	0.158053	0.54488
A0A0C4DG86	SYBU	Syntabulin	1.09303	0.285263	113.8	106.1	92.4		108.9	99.7	96.6	87.6	83.4	0.128331	0.544754
Q8N5C6	SRBD1	S1 RNA-binding domain-containing protein 1	0.900825	0.285646	87.778	110.34	109.158	94.6484	113.349	107.117	87.9928	132.902	116.357	-0.150681	0.544171
Q9NVD7	PARVA	Alpha-parvin	0.926117	0.285746	105.579	108.831	109.807	94.4447	117.286	113.926	90.8373	123.465	119.563	-0.110733	0.54402
A0A0U1RQV1	ERVK3-1	Endogenous retrovirus group K3 member 1 (Fragment)	0.821224	0.285784	78.4822	69.8327	69.7417	96.3945	130.288	119.18	83.3076	72.0179	73.8388	-0.284153	0.543962
Q9Y5M8	SRPRB	Signal recognition particle receptor subunit beta	0.902137	0.285956	90.3816	80.079	81.0156	100.694	118.854	104.431	84.2937	90.2879	90.1006	-0.148582	0.5437
D6RFF8	GNPDA1	Glucosamine-6-phosphate isomerase (Fragment)	0.949723	0.286104	84.4472	94.8213	93.4639	98.8276	105.002	98.1177	87.3558	101.026	97.536	-0.0744216	0.543476
Q96AT1	KIAA1143	Uncharacterized protein KIAA1143	0.62672	0.286286	85.3	60.8	49.7		139.8	161.8	126.1	42.8	50.2	-0.674106	0.5432
Q9Y3Y2	CHTOP	Chromatin target of PRMT1 protein	0.879807	0.28635	84.3102	81.6601	95.0084	80.0093	120.92	112.086	74.6915	89.3158	87.4509	-0.184742	0.543103
Q9H5U6	ZCCHC4	rRNA N6-adenosine-methyltransferase ZCCHC4	0.838598	0.286539	100.1	87.8	82.9		124.1	142.1	90.2	92	89.8	-0.253949	0.542816
Q9H900	ZWILCH	Protein zwilch homolog	1.13469	0.286828	98.8	125.9	108.9		111.2	116.6	92.6	93.8	75.8	0.182303	0.542378
P32119	PRDX2	Peroxiredoxin-2	1.26367	0.286997	150.661	96.7049	87.6791	97.9186	83.2158	79.9427	136.279	66.652	62.1887	0.337625	0.542122
Q9UBF2	COPG2	Coatomer subunit gamma-2	1.06726	0.2872	115.842	107.136	104.78	111.858	94.2305	91.3626	119.222	103.346	106.726	0.0939134	0.541816
Q92696	RABGGTA	Geranylgeranyl transferase type-2 subunit alpha	1.12924	0.287359	131.157	103.491	94.1665	99.2155	95.9084	85.3544	120.808	83.4075	88.3259	0.175349	0.541575
A0A087WYV9	SYNJ2BP-COX16	Cytochrome c oxidase assembly protein COX16 homolog, mitochondrial	0.873457	0.287382	86.8264	94.3943	103.087	84.7221	127.325	124.973	74.0428	100.326	101.451	-0.195192	0.54154
Q96I34	PPP1R16A	Protein phosphatase 1 regulatory subunit 16A	1.18664	0.287426	104.535	103.054	105.325	110.55	65.5442	56.1666	89.9258	117.762	116.677	0.246881	0.541474
O75843	AP1G2	AP-1 complex subunit gamma-like 2	0.84743	0.288035	99.9595	96.5355	104.709	86.9021	102.831	90.4606	90.4606	131.218	157.505	-0.238834	0.540555
Q8N556	AFAP1	Actin filament-associated protein 1	1.46258	0.288334	69.5082	71.8583	66.3034	185.391	67.4429	58.8968	97.2829	52.416	59.8938	0.548512	0.540104
Q9QC07	ERVK-18	Endogenous retrovirus group K member 18 Pol protein	1.15106	0.288414	110.2	119.4	97.9		98.9	115.1	103.8	92.5	63.9	0.202965	0.539984
P56192	MARS1	Methionine--tRNA ligase, cytoplasmic	1.11785	0.288596	108.539	122.054	121.425	113.346	86.5378	86.1187	95.9668	126.14	125.616	0.160725	0.53971
A0A0U1RRM6	ENAH	Protein enabled homolog	0.799375	0.288606	82.3377	71.6147	71.2317	90.3172	125.421	120.443	122.453	63.0937	61.9448	-0.323055	0.539695
P16383	GCFC2	Intron Large complex component GCFC2	1.20901	0.288783	89.0961	89.6004	82.7922	142.961	97.5855	105.486	81.1951	69.0915	64.8048	0.273821	0.539429
P31323	PRKAR2B	cAMP-dependent protein kinase type II-beta regulatory subunit	0.94822	0.288941	91.9235	91.627	93.1096	97.5626	87.4756	92.22	107.442	101.907	104.279	-0.076707	0.539191
Q9NYL9	TMOD3	Tropomodulin-3	0.847439	0.289049	84.6858	97.2277	112.877	85.8044	103.332	100.113	78.4703	133.633	145.842	-0.238818	0.539028
A0A087WXK8	FAM83D	Chromosome 20 open reading frame 129	0.922621	0.289181	91.9905	94.2928	90.0886	107.225	121.019	110.108	91.6902	103.202	93.6922	-0.11619	0.53883
Q7Z569	BRAP	BRCA1-associated protein	1.15249	0.289487	81.6279	82.8647	82.8647	127.652	82.37	77.0931	69.5074	85.9979	91.7696	0.204754	0.538371
G5EA30	CELF1	CUG triplet repeat, RNA binding protein 1, isoform CRA_c	1.12442	0.289517	129.847	109.949	102.77	94.8401	85.0259	91.7951	125.641	94.8721	88.9233	0.169177	0.538326
Q9H2C0	GAN	Gigaxonin	0.824083	0.289778	96.3597	108.681	114.376	87.2616	101.474	120.072	77.9944	151.572	165.753	-0.279138	0.537935
P67809	YBX1	Y-box-binding protein 1	0.813657	0.290271	74.3578	75.9242	73.2521	99.8017	115.084	105.87	137.29	64.3144	74.1735	-0.297507	0.537196
O60566	BUB1B	Mitotic checkpoint serine/threonine-protein kinase BUB1 beta	0.919824	0.290522	89.3211	93.7172	92.0187	93.2829	116.397	113.3	88.8216	87.6226	94.4166	-0.120571	0.536821
Q69YN4	VIRMA	Protein virilizer homolog	0.918482	0.290846	118.019	111.606	111.831	84.6968	104.181	105.981	123.644	121.619	124.544	-0.122677	0.536337
O94804	STK10	Serine/threonine-protein kinase 10	1.04508	0.290992	95.1131	109.156	105.67	109.646	98.8977	98.4993	94.2167	108.16	102.085	0.0636121	0.536118
P16402	H1-3	Histone H1.3	1.30631	0.291136	145.1	118.3	102		59.6	44.1	122.2	126.1	114.2	0.385493	0.535904
P16278	GLB1	Beta-galactosidase	1.13207	0.2912	112.775	119.584	137.483	106.724	83.3461	94.4369	93.1192	123.976	131.333	0.178958	0.535808
P00167	CYB5A	Cytochrome b5	1.3868	0.291368	196.482	128.802	114.283	90.3242	75.9932	58.5464	183.953	76.9299	82.1991	0.471755	0.535559
Q8WTW3	COG1	Conserved oligomeric Golgi complex subunit 1	1.12022	0.291445	126.994	134.391	125.761	93.8051	90.3416	89.4449	119.484	118.475	118.924	0.163785	0.535444
Q9Y546	LRRC42	Leucine-rich repeat-containing protein 42	0.866769	0.291583	96.6872	111.633	120.141	92.0618	107.839	116.117	88.9845	141.065	152.446	-0.20628	0.535238
O14939	PLD2	Phospholipase D2	1.06483	0.291696	98.3152	93.9777	97.7368	109.514	96.0019	84.9173	84.2426	102.46	101.4	0.0906279	0.53507
Q3KQV9	UAP1L1	UDP-N-acetylhexosamine pyrophosphorylase-like protein 1	0.915098	0.292119	99.0037	89.0933	86.3905	101.829	119.325	115.621	96.4009	92.7972	89.8941	-0.128002	0.53444
Q8IUR7	ARMC8	Armadillo repeat-containing protein 8	0.891213	0.292219	91	90.7	97		112.8	114.6	75.5	107.5	110.8	-0.166158	0.534292
Q14527	HLTF	Helicase-like transcription factor	0.918811	0.292262	110.108	102.363	96.292	95.0643	97.8619	101.002	99.6412	125.389	125.494	-0.12216	0.534228
Q96EH3	MALSU1	Mitochondrial assembly of ribosomal large subunit protein 1	0.932184	0.292542	87.4268	92.9278	93.2225	108.675	104.421	95.6783	91.4543	106.68	114.342	-0.101314	0.533812
Q9NRZ5	AGPAT4	1-acyl-sn-glycerol-3-phosphate acyltransferase delta	0.605363	0.292825	85.2	67.7	60.2		177.2	153.9	165.4	53.9	36.3	-0.724127	0.533391
X6R4W8	ZNF207	BUB3-interacting and GLEBS motif-containing protein ZNF207	0.887611	0.292864	77.311	78.5919	77.6769	98.0152	113.725	96.5244	102.105	78.5919	76.0301	-0.172	0.533333
O75821	EIF3G	Eukaryotic translation initiation factor 3 subunit G	0.82407	0.292968	80.091	74.0291	78.897	83.8465	130.607	125.004	78.1622	70.5389	76.3253	-0.279161	0.53318
Q7Z7H5	TMED4	Transmembrane emp24 domain-containing protein 4	1.61727	0.293205	231.113	67.8666	59.0816	130.184	46.7247	42.0908	143.843	90.3601	54.3512	0.693557	0.532829
Q9NVV4	MTPAP	Poly(A) RNA polymerase, mitochondrial	0.860437	0.293349	94.6585	117.404	123.493	86.2331	115.336	118.438	85.9278	148.995	144.056	-0.216858	0.532616
Q14680	MELK	Maternal embryonic leucine zipper kinase	1.23843	0.29339	131.6	102.5	92.4		63	57	120.3	100.4	98.7	0.308514	0.532554
Q9H2U2	PPA2	Inorganic pyrophosphatase 2, mitochondrial	0.879125	0.293549	98.0962	114.732	121.387	86.3476	107.504	117.027	92.4743	139.744	141.236	-0.185859	0.532319
A0A8I5KRX5	MAP2K1	Dual-specificity mitogen-activated protein kinase kinase 1	1.10918	0.293555	108.135	107.837	104.96	96.681	81.845	78.968	122.222	96.8251	90.7735	0.149489	0.53231
Q6P2Q9	PRPF8	Pre-mRNA-processing-splicing factor 8	0.960485	0.29386	102.393	106.031	105.719	95.8576	105.511	104.056	98.5464	112.996	112.476	-0.0581654	0.53186
Q96PE7	MCEE	Methylmalonyl-CoA epimerase, mitochondrial	0.730354	0.29409	75.9	83.9	86.3		154.3	165.7	88.9	77.4	75.3	-0.453333	0.53152
Q01780	EXOSC10	Exosome component 10	0.912669	0.294258	88.2014	92.0488	91.7602	99.9866	116.961	117.249	83.1036	96.7618	95.4153	-0.131836	0.531271
Q9NWX6	THG1L	Probable tRNA(His) guanylyltransferase	0.83038	0.294515	85.637	81.0735	80.491	75.363	132.048	122.63	86.8021	71.8496	72.238	-0.268156	0.530892
G1UD79	PABIR2	PABIR family member 2	1.21021	0.294665	105.663	80.9261	89.1718	109.406	72.9355	71.7455	126.575	63.8399	62.7348	0.275261	0.530671
H3BM91	COMMD4	COMM domain-containing protein 4 (Fragment)	0.912702	0.294783	96.4339	103.162	99.594	105.049	127.831	120.695	85.0168	114.273	105.812	-0.131784	0.530498
A0A8C8KD64	PAM	Peptidyl-glycine alpha-amidating monooxygenase	0.714598	0.294936	89.4	64.2	75.4		156.5	134.4	119.7	52.6	70.9	-0.484797	0.530272
Q15181	PPA1	Inorganic pyrophosphatase	1.07761	0.295093	93.062	99.8141	105.49	114.919	88.3648	94.432	84.3527	103.435	108.817	0.107831	0.530041
Q9NWX5	ASB6	Ankyrin repeat and SOCS box protein 6	0.75414	0.295189	104.393	111.66	151.07	73.6644	107.048	99.5019	112.359	187.544	224.159	-0.407095	0.5299
Q12872	SFSWAP	Splicing factor, suppressor of white-apricot homolog	1.1686	0.295238	94.0097	92.7727	82.7003	121.635	98.9576	91.8008	102.669	65.9128	59.0211	0.224785	0.529828
Q9NY27	PPP4R2	Serine/threonine-protein phosphatase 4 regulatory subunit 2	1.36015	0.295639	200.198	100.557	90.4784	86.4444	71.352	58.9828	126.212	110.865	71.581	0.44377	0.529238
H0Y368	DPM1	Dolichol-phosphate mannosyltransferase subunit 1	0.900503	0.295732	95.3967	104.421	110.437	96.7498	105.817	107.644	88.199	132.245	131.063	-0.151197	0.529102
Q9Y4R8	TELO2	Telomere length regulation protein TEL2 homolog	0.934966	0.29593	109.736	104.941	111.261	90.0826	111.588	106.14	98.2935	118.127	122.05	-0.0970147	0.528811
Q96PD2	DCBLD2	Discoidin, CUB and LCCL domain-containing protein 2	0.718743	0.296186	71.2939	59.8904	60.3256	95.7458	155.297	139.715	95.4938	56.1472	52.9264	-0.476451	0.528435
H0YMV8	RPS27L	40S ribosomal protein S27	1.33517	0.296398	180.265	92.9059	82.506	101.995	57.9424	59.1309	134.307	99.8391	77.2565	0.417025	0.528124
Q9NXJ5	PGPEP1	Pyroglutamyl-peptidase 1	1.20632	0.296541	74.0207	103.028	95.5106	142.39	79.5922	79.3269	61.3744	103.824	105.858	0.270612	0.527916
Q01085	TIAL1	Nucleolysin TIAR	1.08419	0.296709	104.881	114.369	115.932	105.013	86.1153	88.5132	103.318	111.137	118.435	0.116616	0.52767
Q15050	RRS1	Ribosome biogenesis regulatory protein homolog	0.925927	0.296777	81.9234	90.0583	91.4939	104.386	111.209	108.816	88.8141	92.738	95.035	-0.111029	0.52757
Q9H9J4	USP42	Ubiquitin carboxyl-terminal hydrolase 42	1.25539	0.296947	153.6	103.5	97.9		72	58.8	126.5	107.4	106.6	0.328139	0.527322
Q9GZM8	NDEL1	Nuclear distribution protein nudE-like 1	0.887683	0.297108	95.8972	98.3588	92.4101	93.0249	133.23	125.128	86.1537	92.8203	97.3331	-0.171883	0.527086
Q96NB3	ZNF830	Zinc finger protein 830	1.1222	0.297249	94.5662	106.624	93.7117	107.254	90.2937	87.0655	119.537	77.381	73.6781	0.166331	0.526879
P55735	SEC13	Protein SEC13 homolog	1.14455	0.297461	119.097	129.716	140.107	86.5916	90.4358	82.7853	115.899	106.879	123.321	0.194782	0.526571
P48739	PITPNB	Phosphatidylinositol transfer protein beta isoform	1.08097	0.297496	114.444	107.104	106.897	106.14	87.1513	84.1532	106.174	111.86	113.204	0.112327	0.526518
Q9NRL3	STRN4	Striatin-4	0.859108	0.297547	97.7867	81.3047	86.2292	86.189	118.088	112.862	128.238	75.4757	76.7822	-0.219089	0.526444
O00463	TRAF5	TNF receptor-associated factor 5	0.848511	0.297685	91.8986	99.0845	94.8337	85.1061	139.872	140.884	87.749	84.409	93.5179	-0.236995	0.526243
O00399	DCTN6	Dynactin subunit 6	0.840008	0.297801	84.8677	81.4652	80.7847	89.7805	122.489	137.558	85.6454	75.8268	79.8125	-0.251525	0.526074
Q9HA92	RSAD1	Radical S-adenosyl methionine domain-containing protein 1, mitochondrial	0.680268	0.297863	80.7869	103.924	124.504	89.1872	91.6523	94.2088	81.1704	209.637	255.399	-0.555825	0.525983
P78395	PRAME	Melanoma antigen preferentially expressed in tumors	1.18936	0.29788	174.012	153.548	131.367	84.8917	99.8125	96.5119	143.249	117.9	114.071	0.250184	0.525959
Q9ULJ7	ANKRD50	Ankyrin repeat domain-containing protein 50	1.13595	0.29794	92.512	122.371	120.65	117.201	97.5728	82.3903	77.2283	120.549	120.448	0.1839	0.525871
Q9H0X9	OSBPL5	Oxysterol-binding protein-related protein 5	0.866583	0.298197	97.5071	96.989	102.274	77.7873	140.406	125.485	91.0826	87.6632	95.642	-0.20659	0.525497
Q9Y4P1	ATG4B	Cysteine protease ATG4B	0.771886	0.298284	88.0582	61.9087	71.6108	90.0184	143.222	143.129	77.2473	69.0236	71.9804	-0.373541	0.52537
Q9Y3F4	STRAP	Serine-threonine kinase receptor-associated protein	1.09967	0.298375	99.3485	96.9231	93.7514	106.603	85.0759	83.3035	116.793	79.9452	85.7289	0.137071	0.525238
Q9UBT7	CTNNAL1	Alpha-catulin	1.13328	0.298765	122.9	102.2	95.3		94.7	87.1	120.8	82.7	85.9	0.1805	0.524671
Q96AC1	FERMT2	Fermitin family homolog 2	0.875268	0.298852	103.39	128.613	124.805	80.8114	113.146	129.921	97.203	143.722	140.986	-0.192203	0.524544
Q8IYB1	MB21D2	Nucleotidyltransferase MB21D2	0.802888	0.299035	86	83.1	86.7		86.3	75.3	90.5	139.5	139.4	-0.31673	0.524278
B4DJL6	INTS14	Integrator complex subunit 14	0.857683	0.29909	103.275	112.901	121.054	79.2393	104.634	102.709	99.9914	148.345	151.289	-0.221484	0.524198
Q5QJE6	DNTTIP2	Deoxynucleotidyltransferase terminal-interacting protein 2	0.810224	0.29915	84.4273	77.5945	76.9393	83.6194	134.223	136.843	80.7769	74.3185	71.5105	-0.303608	0.524111
O95989	NUDT3	Diphosphoinositol polyphosphate phosphohydrolase 1	1.42098	0.299307	87.2447	61.3565	60.4789	175.163	75.105	64.7205	93.7533	51.9958	52.4346	0.506886	0.523883
O60341	KDM1A	Lysine-specific histone demethylase 1A	1.08295	0.299517	110.558	116.623	116.304	101.506	90.8723	89.1698	99.385	116.304	117.9	0.114971	0.523579
Q96RF0	SNX18	Sorting nexin-18	0.914628	0.299765	86.5286	103.318	115.264	96.6607	114.188	103.856	91.4793	114.08	125.488	-0.128743	0.523219
A0A087WT23	UBXN8	UBX domain-containing protein 8	0.805114	0.299822	80.6212	78.6457	77.0464	96.398	141.675	140.734	79.6805	76.7642	77.705	-0.312735	0.523136
Q9ULE6	PALD1	Paladin	0.979627	0.299829	97.1091	95.4648	95.3681	99.7063	99.5272	99.4305	95.5616	96.6255	103.493	-0.029695	0.523126
H0YB34	RIDA	2-iminobutanoate/2-iminopropanoate deaminase (Fragment)	0.891636	0.300054	84.8409	89.7467	83.5904	103.625	116.392	119.951	104.656	83.1095	83.1095	-0.165473	0.5228
Q9H8M7	MINDY3	Ubiquitin carboxyl-terminal hydrolase MINDY-3	1.14573	0.300413	98.0569	90.0755	87.1812	117.478	64.9035	69.2012	108.669	88.0582	97.7061	0.196268	0.522281
P42166	TMPO	Lamina-associated polypeptide 2, isoform alpha	0.835734	0.300422	108.102	97.2922	89.8734	69.3003	127.179	119.761	139.791	75.5657	82.9845	-0.258884	0.522268
Q8TAA9	VANGL1	Vang-like protein 1	0.88904	0.300539	92.587	99.3078	97.2013	89.2431	120.875	133.313	82.2549	95.8972	99.6087	-0.169679	0.522098
P00492	HPRT1	Hypoxanthine-guanine phosphoribosyltransferase	0.96673	0.301041	105.686	98.6271	96.9901	101.997	100.571	109.063	102.822	110.29	98.7294	-0.0488157	0.521374
Q99640	PKMYT1	Membrane-associated tyrosine- and threonine-specific cdc2-inhibitory kinase	0.941924	0.301135	92.4334	107.061	105.401	99.1028	107.165	116.813	91.7072	110.588	109.862	-0.086318	0.521239
O60563	CCNT1	Cyclin-T1	0.876021	0.3013	97.3421	108.596	113.66	82.4609	99.1427	92.8408	105.107	134.591	142.018	-0.190963	0.521
P35250	RFC2	Replication factor C subunit 2	0.932076	0.301574	91.1762	85.3243	87.0233	101.112	113.074	98.1607	97.2169	95.5179	85.0412	-0.101481	0.520607
Q9HCN4	GPN1	GPN-loop GTPase 1	0.841709	0.301627	91.1602	98.4618	102.776	89.9868	100.674	91.6027	81.4246	145.701	148.467	-0.248607	0.52053
Q86US8	SMG6	Telomerase-binding protein EST1A	0.812206	0.301649	88.1481	97.3007	112.882	98.7041	103.838	100.787	78.2328	159.734	168.451	-0.300083	0.520497
O95831	AIFM1	Apoptosis-inducing factor 1, mitochondrial	1.09215	0.301668	125.717	114.746	115.194	90.3578	92.4683	89.5577	113.179	107.693	107.581	0.127165	0.520471
Q96DA6	DNAJC19	Mitochondrial import inner membrane translocase subunit TIM14	1.2064	0.30187	147.79	98.4251	101.377	109.588	72.4702	72.4702	141.582	89.2646	97.9162	0.27071	0.520181
Q8NHV4	NEDD1	Protein NEDD1	0.935046	0.3019	97.5431	104.919	104.088	94.8795	111.671	122.786	91.3103	108.139	102.737	-0.0968904	0.520136
Q9HCM9	TRIM39	E3 ubiquitin-protein ligase TRIM39	0.783324	0.30192	94.4	76.7	80.3		160.3	80.3	75.8	105.5	113	-0.352319	0.520108
Q15435	PPP1R7	Protein phosphatase 1 regulatory subunit 7	0.947533	0.301935	85.4877	96.4199	97.9957	101.069	98.2912	102.329	89.2303	108.14	104.594	-0.0777524	0.520086
Q7L5D6	GET4	Golgi to ER traffic protein 4 homolog	1.07033	0.302008	104.159	107.688	106.277	104.242	101.638	90.7486	83.0854	114.847	102.949	0.0980492	0.519982
Q9NZW5	PALS2	Protein PALS2	1.1079	0.302171	113.592	115.758	111.013	92.9862	91.4099	84.0848	125.972	90.9973	96.4653	0.14783	0.519747
Q8N612	FHIP1B	FHF complex subunit HOOK interacting protein 1B	1.24831	0.302202	163.645	138.35	136.45	94.0469	69.2344	59.1402	147.257	126.356	131.225	0.319979	0.519702
Q8IWA4	MFN1	Mitofusin-1	1.31622	0.302426	161.227	102.466	78.8361	105.123	115.431	81.7637	129.023	52.0694	46.8416	0.396404	0.519381
Q9UHY7	ENOPH1	Enolase-phosphatase E1	0.931482	0.302603	86.36	83.366	82.5239	104.383	102.266	102.734	84.3952	95.0615	94.1259	-0.102401	0.519126
Q9BPX3	NCAPG	Condensin complex subunit 3	0.907828	0.30273	93.2412	98.9478	102.209	96.5141	115.762	118.207	76.9367	114.539	112.807	-0.139509	0.518944
Q6PEW1	ZCCHC12	Zinc finger CCHC domain-containing protein 12	0.841387	0.302742	93.5	88.5	84.4		127.5	134.5	101.5	83.5	80.7	-0.249158	0.518928
P46783	RPS10	40S ribosomal protein S10	1.11641	0.302953	129.333	99.9751	91.3463	102.147	88.47	88.2717	117.332	95.8095	83.5109	0.158865	0.518625
A2RRP1	NBAS	NBAS subunit of NRZ tethering complex	1.16918	0.303015	112.421	82.339	79.4168	134.697	100.13	78.9011	102.021	83.3704	72.7128	0.2255	0.518536
Q9NP77	SSU72	RNA polymerase II subunit A C-terminal domain phosphatase SSU72	0.884155	0.303065	107.3	109.506	113.571	82.3679	105.21	100.797	99.171	138.538	139.815	-0.177629	0.518464
P62899	RPL31	60S ribosomal protein L31	0.766487	0.30336	76.3583	62.6836	62.9589	71.9536	144.457	106.736	78.3774	58.829	58.3701	-0.383667	0.518042
O76074	PDE5A	cGMP-specific 3',5'-cyclic phosphodiesterase	0.758361	0.303474	81.9	82.8	81.1		148.3	147.5	103.8	72.5	68.1	-0.399043	0.517878
Q8TB45	DEPTOR	DEP domain-containing mTOR-interacting protein	0.913298	0.30421	85.6	103.2	101.3		101.1	106.5	88.9	120.3	112.6	-0.130842	0.516827
Q8IWE5	PLEKHM2	Pleckstrin homology domain-containing family M member 2	1.27028	0.304268	178.546	170.073	141.79	85.4462	91.9518	83.2301	182.907	94.1945	114.379	0.345147	0.516744
O15212	PFDN6	Prefoldin subunit 6	1.08818	0.304341	99.5101	93.1137	88.4534	104.971	78.3105	83.4277	110.201	86.8086	84.7069	0.121921	0.516639
O60828	PQBP1	Polyglutamine-binding protein 1	0.797639	0.304807	76.6629	67.4997	70.2214	92.6796	132.731	129.556	88.5479	66.1388	64.2335	-0.326193	0.515975
P16070	CD44	CD44 antigen	0.840027	0.304961	112.366	134.787	131.566	59.5461	111.464	107.856	161.59	134.143	137.107	-0.251493	0.515755
P18077	RPL35A	60S ribosomal protein L35a	1.14066	0.305019	100.8	93.4791	84.6401	119.892	93.0326	91.3363	112.05	72.1405	68.4799	0.189873	0.515673
P30626	SRI	Sorcin	1.02949	0.305354	96.8653	100.435	99.0465	107.685	92.5029	98.8482	100.236	99.8396	99.1456	0.0419299	0.515196
P53618	COPB1	Coatomer subunit beta	0.943593	0.305573	101.616	100.78	102.347	95.1907	113.522	115.088	90.0236	109.344	101.825	-0.0837638	0.514886
Q05655	PRKCD	Protein kinase C delta type	1.07043	0.305817	108.364	116.806	107.204	97.5483	94.6474	90.9544	117.544	95.386	103.511	0.0981931	0.514538
Q9Y446	PKP3	Plakophilin-3	1.05548	0.306025	102.56	98.242	100.401	106.108	88.1331	86.5628	104.327	106.584	96.7698	0.0778981	0.514243
Q13464	ROCK1	Rho-associated protein kinase 1	1.04729	0.306292	94.2775	97.8626	99.8005	109.823	98.9284	87.0105	95.9247	95.3434	102.32	0.066665	0.513864
O43502	RAD51C	DNA repair protein RAD51 homolog 3	0.90489	0.306393	81.6291	94.1799	92.8952	110.317	100.9	109.004	81.4315	113.451	118.787	-0.144186	0.513721
Q96QE5	TEFM	Transcription elongation factor, mitochondrial	1.16473	0.306451	130.286	102.268	97.6647	109.222	77.051	78.552	137.491	89.6594	88.8588	0.219994	0.513638
O00506	STK25	Serine/threonine-protein kinase 25	1.17106	0.307029	89.0695	95.8258	118.664	131.048	81.2664	70.323	81.4567	103.439	127.419	0.227815	0.51282
Q6UB99	ANKRD11	Ankyrin repeat domain-containing protein 11	0.800074	0.307142	93.7	84.5	81.6		148	137.3	77.4	84.1	94.4	-0.321795	0.512661
Q92575	UBXN4	UBX domain-containing protein 4	1.34995	0.307159	221.728	121.437	102.89	89.5036	80.2095	86.4704	159.238	92.6131	77.3744	0.432908	0.512637
P61009	SPCS3	Signal peptidase complex subunit 3	1.38884	0.307677	86.1894	68.6504	66.2417	190.908	75.651	78.2856	80.5438	70.9087	65.4136	0.473883	0.511905
Q8TBB5	KLHDC4	Kelch domain-containing protein 4	0.869317	0.308013	85.2801	77.8249	69.9151	98.0443	122.556	106.646	93.2808	77.734	75.8247	-0.202046	0.511431
P04899	GNAI2	Guanine nucleotide-binding protein G(i) subunit alpha-2	0.937075	0.308013	112.82	99.4916	92.6699	90.4441	105.369	102.535	119.432	100.751	99.3866	-0.0937632	0.51143
O75340	PDCD6	Programmed cell death protein 6	0.932215	0.308394	113.291	109.54	107.718	81.0274	111.684	110.826	116.078	104.931	108.361	-0.101265	0.510895
Q9Y6D5	ARFGEF2	Brefeldin A-inhibited guanine nucleotide-exchange protein 2	0.952173	0.308477	100.396	96.0775	93.0352	97.054	112.957	107.462	95.5868	93.7222	97.7458	-0.0707038	0.510777
Q00765	REEP5	Receptor expression-enhancing protein 5	1.33822	0.308635	106.404	93.0724	72.4171	138.564	108.708	85.5015	118.83	40.0763	30.2835	0.420313	0.510555
Q00577	PURA	Transcriptional activator protein Pur-alpha	1.37506	0.308647	74.1907	69.274	68.9071	181.891	68.9071	75.1446	76.172	67.9531	70.228	0.459496	0.510538
Q13601	KRR1	KRR1 small subunit processome component homolog	0.844005	0.30868	98.0495	78.2701	72.2421	87.098	121.973	120.184	112.743	73.0898	69.1339	-0.244677	0.510492
Q8NBN7	RDH13	Retinol dehydrogenase 13	1.1487	0.308682	113.846	110.613	98.9541	103.439	79.6531	78.6734	135.694	85.0417	85.4336	0.199997	0.510488
Q5W0U4	BSPRY	B box and SPRY domain-containing protein	0.816988	0.308697	106.242	110.546	133.54	63.8931	106.119	107.349	94.8061	160.961	164.527	-0.291614	0.510467
Q96IY1	NSL1	Kinetochore-associated protein NSL1 homolog	0.856419	0.308978	62.8577	88.4843	97.9613	101.585	95.7371	114.884	67.983	123.201	110.339	-0.223612	0.510072
Q9NZN5	ARHGEF12	Rho guanine nucleotide exchange factor 12	0.874251	0.309029	99.0082	113.459	130.419	87.0433	111.787	118.595	93.9921	139.256	151.08	-0.19388	0.510001
Q5VV41	ARHGEF16	Rho guanine nucleotide exchange factor 16	0.891332	0.30923	92.9433	90.1205	103.712	94.3969	100.053	97.9616	82.4885	119.603	134.449	-0.165965	0.509718
O15091	PRORP	Mitochondrial ribonuclease P catalytic subunit	1.11172	0.309572	89.9331	99.5853	100.421	125.747	84.8285	81.2089	85.571	109.794	105.989	0.15279	0.509238
A0A590UJ36	PALM3	Paralemmin-3	1.1217	0.309647	119.255	148.028	136.852	91.5668	94.4052	105.344	119.136	123.416	110.1	0.165685	0.509134
Q96ME1	FBXL18	F-box/LRR-repeat protein 18	1.1289	0.309789	109.428	78.4195	72.5252	110.092	88.0724	84.3991	89.4392	78.4195	69.877	0.174913	0.508935
O94874	UFL1	E3 UFM1-protein ligase 1	0.953678	0.309995	98.9258	98.2284	98.2284	99.3963	108.29	116.459	97.2322	98.328	97.1326	-0.0684257	0.508645
P20839	IMPDH1	Inosine-5'-monophosphate dehydrogenase 1	1.1864	0.310168	88.0522	85.1928	79.9786	140.85	92.2572	97.8918	86.2861	68.3729	70.3913	0.24659	0.508403
P53990	IST1	IST1 homolog	0.938294	0.310423	93.2898	89.0406	86.3366	110.753	97.3459	98.8911	111.446	96.7665	101.016	-0.0918882	0.508047
Q9UHR6	ZNHIT2	Zinc finger HIT domain-containing protein 2	0.780895	0.310477	85.1133	72.2571	76.5738	90.01	144.89	149.582	86.2394	69.8173	68.0343	-0.356799	0.50797
Q15075	EEA1	Early endosome antigen 1	1.15025	0.310539	97.2757	91.4336	87.4461	110.568	101.727	95.0501	101.078	62.4085	59.9975	0.201946	0.507884
O14979	HNRNPDL	Heterogeneous nuclear ribonucleoprotein D-like	1.17303	0.310738	95.739	99.9862	90.0761	118.662	92.9076	88.7488	122.726	64.9468	61.6729	0.230242	0.507606
O60256	PRPSAP2	Phosphoribosyl pyrophosphate synthase-associated protein 2	0.936747	0.3109	111.004	114.294	111.442	88.3956	109.358	110.784	105.19	125.044	116.927	-0.0942679	0.507379
Q96SB3	PPP1R9B	Neurabin-2	1.08012	0.311228	99.115	108.862	105.374	94.2172	96.2421	85.8792	111.94	98.089	79.5177	0.111197	0.506921
Q8N5P1	ZC3H8	Zinc finger CCCH domain-containing protein 8	0.624808	0.311282	53.3011	39.6448	42.7071	83.8984	151.213	138.881	85.9935	29.4646	33.6856	-0.678514	0.506845
Q86X53	ERICH1	Glutamate-rich protein 1	0.899915	0.311483	95.6815	100.612	105.858	88.2672	122.015	129.254	81.623	102.711	106.697	-0.152139	0.506566
Q8N0Z3	SPICE1	Spindle and centriole-associated protein 1	1.07629	0.311728	111.5	103.7	94.9		91.1	92.4	84.9	106.6	105.2	0.106064	0.506224
Q13433	SLC39A6	Zinc transporter ZIP6	1.18218	0.31176	82.3861	108.102	118.296	108.832	131.668	91.1764	74.5309	78.1779	66.0211	0.241449	0.50618
Q9H267	VPS33B	Vacuolar protein sorting-associated protein 33B	0.903339	0.311866	93.3904	101.755	111.497	94.9338	111.708	103.661	87.0373	116.897	136.38	-0.146661	0.506032
P06400	RB1	Retinoblastoma-associated protein	1.17546	0.312248	118.599	104.889	91.8497	125.811	79.6734	77.66	141.418	84.8507	85.5218	0.233225	0.5055
Q9UKE5	TNIK	TRAF2 and NCK-interacting protein kinase	0.853341	0.31242	99.0581	83.3151	87.0975	84.4923	133.611	113.677	120.219	78.8171	72.1724	-0.228806	0.505261
Q5PSV4	BRMS1L	Breast cancer metastasis-suppressor 1-like protein	0.882299	0.312443	94.3166	92.4323	96.7242	82.7118	122.475	128.966	101.121	83.2205	83.0111	-0.18066	0.505229
Q8ND82	ZNF280C	Zinc finger protein 280C	1.07496	0.312694	106.438	94.1643	102.02	112.487	91.5132	82.2833	97.8956	113.213	97.7974	0.104282	0.50488
Q8NEM2	SHCBP1	SHC SH2 domain-binding protein 1	0.871438	0.312805	80.6972	75.8359	76.8081	89.7022	117.643	113.365	78.1693	77.0998	77.0998	-0.19853	0.504726
Q9BXS9	SLC26A6	Solute carrier family 26 member 6	1.13534	0.313015	101.7	90.5	120.2		93	66.7	89.2	105.5	104.2	0.183124	0.504434
P18754	RCC1	Regulator of chromosome condensation	1.08298	0.313383	91.7708	91.7708	86.3993	116.954	94.6842	86.9456	97.2334	82.7576	84.9426	0.115005	0.503924
Q02978	SLC25A11	Mitochondrial 2-oxoglutarate/malate carrier protein	1.04924	0.313655	113.154	109.463	108.514	101.285	100.078	101.554	91.6414	111.151	110.729	0.0693513	0.503547
Q99575	POP1	Ribonucleases P/MRP protein subunit POP1	1.03066	0.313914	101.712	104.025	103.019	102.186	96.3794	92.4559	99.8	103.623	106.138	0.043569	0.503189
P30825	SLC7A1	High affinity cationic amino acid transporter 1	0.937262	0.313978	100.267	115.569	111.503	95.8255	115.355	126.056	100.695	117.067	105.189	-0.0934765	0.5031
Q06265	EXOSC9	Exosome complex component RRP45	0.942448	0.314144	101.789	91.172	89.6135	107.612	101.497	101.205	117.277	99.9386	97.6008	-0.0855152	0.502871
Q96T60	PNKP	Bifunctional polynucleotide phosphatase/kinase	1.16293	0.314492	114.017	134.675	143.919	103.678	89.0224	84.343	87.4245	131.822	140.838	0.21776	0.50239
P00390	GSR	Glutathione reductase, mitochondrial	1.04611	0.314951	104.451	94.1218	96.5352	103.423	86.4955	91.6119	94.4114	102.52	101.169	0.0650277	0.501758
Q9H974	QTRT2	Queuine tRNA-ribosyltransferase accessory subunit 2	0.896102	0.315072	97.7941	89.434	86.226	90.5994	120.153	123.944	88.4619	86.7121	88.5591	-0.158265	0.501591
A0A8I5KX04	PCF11	Pre-mRNA cleavage complex 2 protein Pcf11	1.10187	0.315217	107.355	117.322	99.0491	103.313	81.0873	79.1147	115.661	97.8032	110.781	0.139957	0.50139
A0A669KAY3	CFAP298-TCP10L	CFAP298-TCP10L readthrough	0.763193	0.315255	74.3545	69.6123	69.1649	93.3421	137.256	152.914	85.6284	64.6911	61.4699	-0.389881	0.501338
Q9HB09	BCL2L12	Bcl-2-like protein 12	0.883766	0.315318	89.3148	103.592	113.361	90.9793	95.4338	104.773	91.1398	130.752	139.769	-0.178263	0.501251
A0A804HIQ1	SACS	Sacsin	0.914791	0.315675	124.532	104.584	108.965	85.1129	104.007	103.2	120.15	125.108	125.8	-0.128487	0.50076
Q9Y605	MRFAP1	MORF4 family-associated protein 1	0.898531	0.315713	103.961	102.329	112.888	88.5901	99.0627	101.458	98.1918	131.83	136.728	-0.154359	0.500707
F5GXT1	CD9	Tetraspanin	1.3773	0.31572	71.8438	79.3554	71.8438	178.906	56.2999	56.8949	108.509	76.8267	66.2658	0.461848	0.500698
Q9Y263	PLAA	Phospholipase A-2-activating protein	0.913892	0.315736	98.1911	87.2266	87.6182	91.2764	117.869	113.855	92.3173	85.9539	88.3035	-0.129905	0.500675
Q8TDD1	DDX54	ATP-dependent RNA helicase DDX54	0.796532	0.315744	77.4809	75.4444	74.5187	94.1577	143.02	138.392	81.3688	73.0376	68.8719	-0.328196	0.500665
Q9NRG0	CHRAC1	Chromatin accessibility complex protein 1	0.895104	0.315918	88.5283	112.04	120.65	98.1118	98.3525	102.216	111.819	132.241	140.961	-0.159873	0.500426
O95070	YIF1A	Protein YIF1A	1.17195	0.316066	129.2	110.6	103.7		89.2	70.1	135.1	91	103.1	0.228917	0.500223
D6RJB0	LARP1B	La-related protein 1B (Fragment)	1.06019	0.316311	117.683	111.821	109.975	98.8166	98.793	90.8679	114.969	104.655	107.478	0.0843276	0.499885
Q9NUL7	DDX28	Probable ATP-dependent RNA helicase DDX28	0.804781	0.316438	84.4915	98.4037	110.167	85.9012	88.9027	70.5792	113.56	144.665	170.906	-0.313332	0.499711
Q96AE7	TTC17	Tetratricopeptide repeat protein 17	0.599952	0.316475	83.9	55.5	58.8		187.9	165	109.7	44.2	43.8	-0.737082	0.499661
Q5TIE3	VWA5B1	von Willebrand factor A domain-containing protein 5B1	1.27473	0.316722	180.995	96.7578	108.729	93.4393	74.353	48.8731	115.428	117.954	114.001	0.350195	0.499322
P11172	UMPS	Uridine 5'-monophosphate synthase	1.06562	0.317066	102.347	88.9898	85.1206	109.142	91.3849	87.3316	98.4783	88.1607	86.9631	0.0916927	0.498851
A0A3B3ITT1	RAB12	Ras-related protein Rab-12	0.782844	0.317527	69.9513	60.8541	68.6265	98.9877	139.284	125.948	81.2566	63.5038	66.5068	-0.353203	0.498219
Q06323	PSME1	Proteasome activator complex subunit 1	1.07374	0.317587	112.028	101.039	100.53	101.567	86.4885	85.2674	115.386	99.4108	96.7653	0.102638	0.498138
Q96SZ6	CDK5RAP1	Mitochondrial tRNA methylthiotransferase CDK5RAP1	0.821583	0.317621	80.4295	73.4799	71.0707	97.6217	130.374	130.559	88.213	73.2019	68.4762	-0.283522	0.498091
P35790	CHKA	Choline kinase alpha	0.753465	0.317706	128.893	127.871	137.943	54.3817	102.472	76.3431	197.207	158.817	210.199	-0.408387	0.497975
Q9H269	VPS16	Vacuolar protein sorting-associated protein 16 homolog	1.08872	0.317815	123.683	104.271	104.801	107.196	88.9963	84.329	109.044	119.227	103.528	0.122629	0.497826
Q15436	SEC23A	Protein transport protein Sec23A	1.11514	0.318066	115.767	116.515	118.546	106.718	86.05	80.9191	95.8843	124.104	125.922	0.157224	0.497482
P27708	CAD	CAD protein	0.96404	0.318202	95.4566	95.2612	94.8704	103.23	107.865	103.371	92.6232	98.6809	101.612	-0.0528356	0.497297
Q02878	RPL6	60S ribosomal protein L6	1.05528	0.318349	104.007	91.006	90.5383	108.782	88.2001	93.8119	101.575	93.2507	90.2577	0.0776255	0.497096
Q8IV38	ANKMY2	Ankyrin repeat and MYND domain-containing protein 2	0.860489	0.318538	84.9768	86.5837	75.2408	89.2815	121.841	116.17	104.449	82.6137	63.1418	-0.216771	0.496839
Q93050	ATP6V0A1	V-type proton ATPase 116 kDa subunit a 1	1.11553	0.318793	135.338	104.444	107.651	96.284	86.1633	83.2769	120.479	105.085	102.199	0.157732	0.496491
O15260	SURF4	Surfeit locus protein 4	0.838066	0.319036	110.093	114.981	132.454	67.2407	134.531	144.428	75.0245	141.374	138.197	-0.254864	0.49616
Q9P0U1	TOMM7	Mitochondrial import receptor subunit TOM7 homolog	0.925257	0.319054	92.3607	102.97	104.53	99.9415	110.354	120.859	84.0399	110.25	114.619	-0.112075	0.496135
Q09666	AHNAK	Neuroblast differentiation-associated protein AHNAK	1.05811	0.31919	88.6254	111.624	109.245	99.171	101.215	89.4185	96.5561	94.7717	100.819	0.0814832	0.495951
F8W130	TROAP	Tastin	1.14312	0.31924	84.748	82.9327	88.0921	131.735	83.697	82.8371	99.4619	73.0916	84.6525	0.192974	0.495883
Q8N8R5	C2orf69	Mitochondrial protein C2orf69	0.916085	0.319249	93.8988	98.8736	103.019	93.4031	117.218	126.338	87.2658	105.299	94.9352	-0.126446	0.49587
Q9H0E2	TOLLIP	Toll-interacting protein	1.29638	0.319377	135.2	101.5	98		60.6	50.8	144.8	90.5	83.6	0.374491	0.495697
A0A2R8YEL0	AGPS	Alkylglycerone-phosphate synthase	0.920747	0.319433	89.0363	93.7824	88.182	99.8491	112.672	117.608	96.3452	92.0738	84.7648	-0.119123	0.495621
Q86XK2	FBXO11	F-box only protein 11	1.21835	0.319561	103.332	125.799	91.0076	125.597	78.0201	71.1945	150.542	71.2893	86.2677	0.284933	0.495446
Q16795	NDUFA9	NADH dehydrogenase [ubiquinone] 1 alpha subcomplex subunit 9, mitochondrial	1.03262	0.319891	106.675	108.476	101.471	99.9406	99.87	100.771	109.177	96.8679	97.5684	0.0463119	0.494998
O15027	SEC16A	Protein transport protein Sec16A	1.08429	0.319957	97.5462	103.833	104.423	114.972	82.9094	84.3829	96.6621	106.977	114.148	0.116756	0.494909
E7EUC7	UGP2	UTP--glucose-1-phosphate uridylyltransferase	1.0409	0.320146	93.9965	99.1483	97.3986	109.886	98.5651	99.2455	88.9419	97.107	97.0098	0.0578321	0.494652
A0A0D9SFM0	SHPRH	E3 ubiquitin-protein ligase SHPRH	0.876759	0.320217	98.7	97.3	80.6		103.4	95.2	136.6	87.5	103.1	-0.189747	0.494556
P62244	RPS15A	40S ribosomal protein S15a	1.05507	0.320311	115.169	96.4638	94.8969	102.062	96.0721	97.5411	106.061	93.4279	90.9796	0.0773369	0.494428
J3KQ41	COPS7B	COP9 signalosome complex subunit 7b	1.06638	0.320391	104.952	109.204	112.522	110.645	93.8551	99.9739	88.6698	112.73	117.397	0.0927219	0.49432
P49207	RPL34	60S ribosomal protein L34	1.27854	0.320507	134.034	80.7004	67.9235	115.725	74.518	75.1775	128.593	58.6088	52.5913	0.354499	0.494163
Q5HY81	UBL4A	Ubiquitin-like protein 4A	1.3048	0.320522	95.3327	76.4373	68.5058	144.543	78.459	70.5276	120.371	47.2776	52.0209	0.38383	0.494142
P43686	PSMC4	26S proteasome regulatory subunit 6B	1.04673	0.320963	101.056	108.223	104.23	100.173	101.056	106.175	105.356	93.6842	87.7458	0.0658868	0.493545
A0A6Q8PGN5	AARS1	Alanine--tRNA ligase	1.06046	0.321005	114.577	112.455	113.092	102.423	91.5555	94.1017	114.047	110.864	111.076	0.0846929	0.493488
Q16539	MAPK14	Mitogen-activated protein kinase 14	1.03841	0.321026	98.0967	99.7495	97.9023	107.752	92.8468	92.8468	106.361	95.6662	97.9995	0.0543728	0.49346
Q86YZ3	HRNR	Hornerin	0.639009	0.32127	63.3	67	81.8		94.9	86	65.8	219.1	87.4	-0.646091	0.49313
Q16134	ETFDH	Electron transfer flavoprotein-ubiquinone oxidoreductase, mitochondrial	1.24648	0.32128	167.261	161.323	150.711	89.6023	100.053	94.6209	188.61	94.242	92.9787	0.317857	0.493117
Q8TCS8	PNPT1	Polyribonucleotide nucleotidyltransferase 1, mitochondrial	0.924805	0.321296	87.4204	105.009	105.321	90.4691	102.407	101.366	89.0856	121.868	110.004	-0.112779	0.493095
Q9HA65	TBC1D17	TBC1 domain family member 17	1.16935	0.321648	96.8582	87.6813	82.0083	138.577	97.6925	76.0016	107.537	69.828	82.0083	0.225704	0.49262
Q5JPI3	C3orf38	Uncharacterized protein C3orf38	1.06813	0.321668	97.1769	111.118	113.988	108.499	96.3568	113.886	85.1835	107.735	100.97	0.0950884	0.492593
P54727	RAD23B	UV excision repair protein RAD23 homolog B	0.964121	0.321853	97.9428	104.437	107.056	98.8187	98.9903	101.4	107.37	107.475	114.075	-0.0527141	0.492343
Q9Y399	MRPS2	28S ribosomal protein S2, mitochondrial	1.09472	0.321863	126.93	110.318	103.503	96.3433	93.0678	80.9285	115.536	107.23	102.332	0.130561	0.492328
Q66K89	E4F1	Transcription factor E4F1	1.12001	0.321904	115.548	88.9732	88.1944	106.584	77.6812	70.1856	96.6634	110.876	90.2387	0.163506	0.492273
A0A7I2V588	SGTA	Small glutamine-rich tetratricopeptide repeat-containing protein alpha	1.11612	0.322062	107.071	95.9851	90.4894	110.95	90.2999	83.6672	121	77.4135	80.6351	0.158491	0.49206
O15528	CYP27B1	25-hydroxyvitamin D-1 alpha hydroxylase, mitochondrial	0.665654	0.322174	99.1	65	59.4		159.4	160.6	136.7	57.1	45.8	-0.587156	0.491909
P63146	UBE2B	Ubiquitin-conjugating enzyme E2 B	1.06372	0.322513	103.4	91.8	103.3		93	96.6	80.1	100.6	97.4	0.0891131	0.491453
Q6P1N0	CC2D1A	Coiled-coil and C2 domain-containing protein 1A	1.0486	0.322601	109.566	105.723	108.423	96.9053	108.423	104.788	88.4834	100.738	98.9726	0.0684576	0.491334
Q9P2R3	ANKFY1	Rabankyrin-5	0.864155	0.322822	127.758	121.415	127.124	77.243	119.385	112.787	107.332	151.61	164.931	-0.210638	0.491037
Q96AQ6	PBXIP1	Pre-B-cell leukemia transcription factor-interacting protein 1	1.19009	0.322849	138.224	130.283	116.932	100.415	93.9142	79.758	160.322	85.9729	90.3464	0.251068	0.491
Q9H3G5	CPVL	Probable serine carboxypeptidase CPVL	1.18577	0.322873	145.852	113.059	114.774	94.1481	75.8728	75.6585	144.887	93.0192	103.736	0.245825	0.490968
P23470	PTPRG	Receptor-type tyrosine-protein phosphatase gamma	1.63644	0.322953	52.5	176.9	209.1		45.4	40.9	36.5	168.1	155.7	0.710559	0.490861
Q53EU6	GPAT3	Glycerol-3-phosphate acyltransferase 3	0.920254	0.323027	104.767	110.864	120.842	85.2503	115.853	106.208	102.217	118.736	129.822	-0.119896	0.490762
P53621	COPA	Coatomer subunit alpha	1.06865	0.323133	120.4	105.747	98.779	99.5037	101.136	95.2951	114.354	94.8852	90.7865	0.0957841	0.490619
A0A096LPC5	WASHC2C	WASH complex subunit 2C	0.687613	0.32324	84.2	70.6	65.8		171.1	150.6	93.4	57.6	62	-0.540331	0.490474
Q96FZ2	HMCES	Abasic site processing protein HMCES	0.845435	0.32348	83.799	78.3658	76.1558	88.975	127.448	123.857	89.14	72.2881	71.1831	-0.242234	0.490153
Q9BTT0	ANP32E	Acidic leucine-rich nuclear phosphoprotein 32 family member E	1.08636	0.323514	86.8401	114.996	112.329	107.412	93.0642	100.079	80.3197	109.069	102.548	0.119503	0.490107
P22830	FECH	Ferrochelatase, mitochondrial	1.15063	0.323609	144.065	112.591	127.75	91.8298	86.9021	75.4463	108.888	125.435	120.691	0.202428	0.48998
P49736	MCM2	DNA replication licensing factor MCM2	0.949093	0.324515	93.6629	92.0282	92.1243	99.157	108.857	108.568	96.4517	93.1821	89.4318	-0.0753789	0.488766
I3L0U5	CCDC137	Coiled-coil domain-containing protein 137 (Fragment)	1.46557	0.324573	82.0566	73.7228	62.2548	189.597	63.3232	54.4907	126.005	51.9977	51.8552	0.551464	0.488688
C9J6P4	ZC3HAV1	Zinc finger CCCH-type antiviral protein 1	1.03216	0.324657	98.7309	100.609	96.1613	109.43	94.9754	99.5215	94.58	99.9169	101.399	0.0456654	0.488575
Q8N5D0	WDTC1	WD and tetratricopeptide repeats protein 1	1.11393	0.324696	108.5	104.8	102.5		90	71	92.3	116	103.2	0.155662	0.488523
Q5TEC6	H3-7	Histone H3-7	1.19411	0.3247	110.783	113.852	118.864	119.885	64.1377	57.7955	102.6	129.912	130.628	0.255936	0.488518
A0A7I2YQE1	KPNA2	Importin subunit alpha	0.951499	0.324753	95.6666	98.618	101.875	99.71	102.892	106.556	89.5602	106.556	114.495	-0.0717255	0.488447
Q9BW62	KATNAL1	Katanin p60 ATPase-containing subunit A-like 1	0.944525	0.324828	94.1073	109.668	108.081	101.522	109.774	115.808	93.0488	115.808	112.632	-0.0823386	0.488347
B4DY08	HNRNPC	Heterogeneous nuclear ribonucleoproteins C1/C2	0.935486	0.324972	92.5311	90.2202	90.2202	93.0909	108.707	110.826	96.4789	87.8131	85.3096	-0.0962126	0.488153
Q9UL25	RAB21	Ras-related protein Rab-21	0.910395	0.325261	95.631	87.3237	90.0284	93.9085	122.775	114.274	87.9033	89.3522	89.4488	-0.135435	0.487768
H3BQQ9	UBE2I	SUMO-conjugating enzyme UBC9 (Fragment)	0.866571	0.325481	88.242	99.9164	112.537	84.5059	96.7612	98.7595	84.8764	129.681	145.562	-0.206609	0.487474
Q9NQZ5	STARD7	StAR-related lipid transfer protein 7, mitochondrial	0.872888	0.325638	77.0927	87.2785	98.9622	104.444	115.04	94.3686	70.8014	123.927	122.529	-0.196131	0.487265
E5RJD8	TBCA	Tubulin-specific chaperone A	0.901967	0.325643	93.4535	82.8381	81.985	94.4159	113.452	118.381	90.0414	81.8903	85.018	-0.148854	0.487258
Q9H773	DCTPP1	dCTP pyrophosphatase 1	1.2051	0.325737	145.73	127.912	133.458	106.648	64.782	67.142	119.652	146.202	135.11	0.269158	0.487133
Q96JB2	COG3	Conserved oligomeric Golgi complex subunit 3	0.968348	0.325878	101.194	97.5218	93.9514	103.485	110.171	101.398	97.9298	102.928	98.9499	-0.0464031	0.486944
O76021	RSL1D1	Ribosomal L1 domain-containing protein 1	0.886902	0.326179	116.806	111.418	117.608	82.2124	102.936	113.826	100.643	141.91	143.973	-0.173154	0.486545
P31930	UQCRC1	Cytochrome b-c1 complex subunit 1, mitochondrial	0.967312	0.326316	90.8427	94.9546	94.4764	102.077	103.848	100.596	92.1815	100.596	96.867	-0.0479475	0.486361
P49721	PSMB2	Proteasome subunit beta type-2	1.10928	0.326707	123.598	112.668	106.467	98.3345	87.1283	84.1855	129.799	98.2689	97.6383	0.149622	0.485842
O75351	VPS4B	Vacuolar protein sorting-associated protein 4B	0.887731	0.326713	88.8918	95.5561	102.631	93.3012	97.7092	96.3764	82.7401	121.188	137.593	-0.171805	0.485833
P50613	CDK7	Cyclin-dependent kinase 7	0.953476	0.327396	106.079	102.677	97.8322	90.989	107.11	113.193	100.1	106.182	94.6364	-0.0687317	0.484926
P49792	RANBP2	E3 SUMO-protein ligase RanBP2	0.956224	0.327403	92.9048	100.971	100.174	95.8087	111.824	108.538	97.9832	95.7926	95.4938	-0.0645801	0.484917
O60907	TBL1X	F-box-like/WD repeat-containing protein TBL1X	1.44494	0.327449	183.9	100.3	85.3		57.7	53.8	166.1	80.3	68.3	0.531009	0.484856
D6W5Y5	CIRBP	Cold-inducible RNA-binding protein	0.85984	0.327669	99.3777	133.372	139.203	74.216	110.296	113.894	118.112	153.719	152.602	-0.217861	0.484565
P43246	MSH2	DNA mismatch repair protein Msh2	0.925008	0.327919	105.147	110.284	111.596	93.7264	100.338	102.305	108.207	125.258	132.472	-0.112463	0.484233
O95684	CEP43	Centrosomal protein 43	0.902873	0.328054	89.2662	124.682	114.627	86.4485	97.9806	131.05	106.918	123.677	114.962	-0.147406	0.484054
Q9NYF3	FAM53C	Protein FAM53C	0.89884	0.328075	97.7759	114.652	103.472	84.6357	115.707	114.125	79.9505	125.411	121.824	-0.153864	0.484027
Q9H9Q4	NHEJ1	Non-homologous end-joining factor 1	0.919235	0.328159	90.9778	97.775	102.062	95.0746	115.448	106.35	78.3246	109.383	115.239	-0.121495	0.483915
P61970	NUTF2	Nuclear transport factor 2	0.953141	0.328516	90.7088	97.8113	101.058	99.9674	104.406	107.755	89.3898	99.8406	109.48	-0.0692391	0.483443
Q9NVJ2	ARL8B	ADP-ribosylation factor-like protein 8B	0.930947	0.328719	89.0831	94.4163	97.3791	107.852	93.0336	122.07	102.317	95.5027	109.033	-0.103229	0.483175
P54819	AK2	Adenylate kinase 2, mitochondrial	1.0706	0.328799	87.7151	99.8268	99.8268	117.275	86.3904	88.3775	96.3258	99.8268	101.53	0.0984172	0.483069
Q6ZRS2	SRCAP	Helicase SRCAP	0.88585	0.329005	96.9695	124.871	127.616	83.6118	117.324	114.008	98.2274	138.479	143.053	-0.174866	0.482798
O14737	PDCD5	Programmed cell death protein 5	1.20818	0.329075	91.452	78.6912	74.7649	132.221	84.0082	81.227	107.485	59.6319	57.8323	0.272832	0.482706
O75608	LYPLA1	Acyl-protein thioesterase 1	1.10711	0.32937	98.6299	92.2695	83.2217	121.081	94.6882	98.2715	99.2569	77.3989	76.5927	0.146802	0.482316
Q92995	USP13	Ubiquitin carboxyl-terminal hydrolase 13	1.05638	0.329395	105.169	104.674	102.792	113.933	104.575	114.676	91.602	102.594	91.3049	0.0791311	0.482283
Q96KB5	PBK	Lymphokine-activated killer T-cell-originated protein kinase	1.07839	0.329979	113.388	109.777	102.761	96.9576	90.8963	90.9995	120.817	96.9836	90.4836	0.10888	0.481514
Q9Y4D7	PLXND1	Plexin-D1	0.86143	0.330829	93.284	98.9846	97.0153	80.7898	132.463	141.481	88.1015	87.2723	87.6869	-0.215194	0.480396
P11277	SPTB	Spectrin beta chain, erythrocytic	0.868288	0.330862	89.5	87.6	80		123.4	109.8	99.1	92	69.2	-0.203755	0.480353
Q8IXU6	SLC35F2	Solute carrier family 35 member F2	0.877526	0.330879	80.8	91.4	104.8		102.6	90.7	84.3	124.9	123.6	-0.188485	0.48033
Q8N205	SYNE4	Nesprin-4	1.23617	0.330999	155.3	96	83.8		82	71.1	123.3	95.3	80.1	0.305873	0.480173
Q9GZL7	WDR12	Ribosome biogenesis protein WDR12	0.962676	0.331007	95.414	99.9336	98.2262	98.9761	106.06	109.274	91.0952	103.449	99.8331	-0.054877	0.480162
A0A7P0Z4K1	PNISR	Arginine/serine-rich protein PNISR	1.58707	0.331065	167.1	120.6	101.1		63.6	49.2	209.8	40	45.7	0.666364	0.480086
Q99538	LGMN	Legumain	0.817937	0.331122	101.735	104.687	120.433	76.59	99.2744	81.8061	105.302	158.445	171.731	-0.289939	0.480012
Q9NW82	WDR70	WD repeat-containing protein 70	1.09943	0.331369	110.037	122.546	132.086	89.2205	94.2414	98.1637	94.0294	111.945	117.669	0.136761	0.479688
Q2T9J0	TYSND1	Peroxisomal leader peptide-processing protease	1.18784	0.331387	143.831	136.452	119.118	85.0972	96.6293	83.9796	151.796	89.8359	87.6105	0.248343	0.479664
O15084	ANKRD28	Serine/threonine-protein phosphatase 6 regulatory ankyrin repeat subunit A	1.12958	0.331476	124.09	107.01	107.833	87.4798	95.8973	78.7139	126.045	80.1545	91.0612	0.175783	0.479547
P31689	DNAJA1	DnaJ homolog subfamily A member 1	0.968121	0.33173	94.1812	101.229	101.74	100.396	106.746	109.299	95.8156	100.004	101.434	-0.0467413	0.479216
Q8TBK2	SETD6	N-lysine methyltransferase SETD6	1.30596	0.332459	172.5	107.4	89.4		85.1	85.6	153.8	69.8	77	0.385113	0.478262
O43143	DHX15	ATP-dependent RNA helicase DHX15	0.970447	0.333525	102.752	97.3383	96.6366	97.8527	105.358	106.16	93.8297	103.854	99.0424	-0.0432791	0.476872
M0R2A0	EMC10	ER membrane protein complex subunit 10	1.11338	0.333527	97.3869	102.247	92.4318	121.617	87.572	71.0867	112.157	86.7144	106.916	0.15494	0.476869
B4DUT8	CNN2	Calponin	1.11581	0.333702	126.918	104.622	99.981	100.038	89.993	91.6072	128.835	87.3698	85.6547	0.15809	0.476641
O75528	TADA3	Transcriptional adapter 3	0.934485	0.333766	90.9193	101.472	103.502	90.3077	115.171	116.084	93.4561	98.0224	93.862	-0.0977558	0.476557
O95602	POLR1A	DNA-directed RNA polymerase I subunit RPA1	0.898757	0.333881	78.7044	83.041	88.3002	111.115	103.617	103.801	75.0137	106.662	113.213	-0.153997	0.476409
Q9BW83	IFT27	Intraflagellar transport protein 27 homolog	0.836129	0.334796	98.4	88.1	82.7		133.2	133	113.3	81.5	75.6	-0.258203	0.47522
Q9NWK9	ZNHIT6	Box C/D snoRNA protein 1	1.14339	0.335348	86.7963	84.161	77.7851	126.921	92.7471	84.501	92.7471	67.8388	72.8545	0.193324	0.474504
Q7Z4S6	KIF21A	Kinesin-like protein KIF21A	0.929779	0.335443	106.544	96.3821	88.5812	94.5874	100.488	96.9979	124.917	102.951	93.7133	-0.10504	0.474382
P50579	METAP2	Methionine aminopeptidase 2	0.924366	0.335484	97.3817	94.3945	91.8056	96.2169	116.4	115.504	106.941	90.6108	84.1386	-0.113465	0.474328
Q08722	CD47	Leukocyte surface antigen CD47	1.23258	0.335571	78.01	81.5667	76.3502	148.219	95.3192	92.6319	80.4601	58.7248	62.4396	0.30168	0.474216
Q96DB5	RMDN1	Regulator of microtubule dynamics protein 1	0.850149	0.33564	95.1962	113.016	129.519	75.8705	112.896	112.657	83.2368	145.664	153.677	-0.234213	0.474126
P20336	RAB3A	Ras-related protein Rab-3A	0.855263	0.335815	79.8	101.2	99.8		142.3	127.5	88.6	94.2	94.6	-0.22556	0.4739
Q86WA6	BPHL	Valacyclovir hydrolase	0.746006	0.336027	85.7342	53.5614	65.3341	86.2258	138.936	153.315	75.4892	61.4698	58.1447	-0.422742	0.473626
P32321	DCTD	Deoxycytidylate deaminase	1.24174	0.336171	146.039	187.346	149.217	79.7268	107.666	108.766	173.17	83.7129	92.7563	0.31236	0.47344
Q9Y2D8	SSX2IP	Afadin- and alpha-actinin-binding protein	1.14445	0.336255	94.1343	96.3235	90.9418	108.859	106.54	99.3336	98.3302	65.0366	57.0096	0.194659	0.473331
Q3B726	POLR1F	DNA-directed RNA polymerase I subunit RPA43	0.923877	0.336262	97.4	90.2	93		117.2	108.1	102.2	89.3	89.4	-0.114227	0.473322
Q8TDW0	LRRC8C	Volume-regulated anion channel subunit LRRC8C	0.927938	0.336312	100.5	86.1	100.3		117.1	111.3	94.8	95.6	96.5	-0.107899	0.473257
O00461	GOLIM4	Golgi integral membrane protein 4	0.77167	0.336831	90	70.3	83.1		151.3	134.8	102.7	73.1	63.8	-0.373945	0.472587
A0A087X0R6	SNX12	Sorting nexin-12	0.774265	0.336951	84.0738	61.6481	62.7376	93.6507	138.458	133.465	102.595	57.0177	56.2005	-0.369101	0.472433
Q00688	FKBP3	Peptidyl-prolyl cis-trans isomerase FKBP3	0.923778	0.337113	84.5106	95.1235	100.233	98.64	107.898	111.338	78.5162	104.361	110.06	-0.114382	0.472224
O75688	PPM1B	Protein phosphatase 1B	1.24483	0.337374	85.6095	74.061	76.99	127.364	102.849	77.6595	93.8943	47.8677	43.265	0.315954	0.471888
Q9BRD0	BUD13	BUD13 homolog	0.696128	0.337398	70.9326	32.8884	36.4037	90.7434	107.571	100.149	129.522	37.1068	40.3878	-0.522575	0.471858
Q96J02	ITCH	E3 ubiquitin-protein ligase Itchy homolog	0.890009	0.337453	86.7116	113.603	117.994	92.8439	110.31	117.335	84.0773	128.311	137.421	-0.168108	0.471786
Q8TAG9	EXOC6	Exocyst complex component 6	1.13955	0.337641	78.0994	94.9159	75.108	130.127	82.1418	84.163	87.397	77.2909	83.9205	0.188458	0.471545
P84157	MXRA7	Matrix-remodeling-associated protein 7	0.87828	0.337869	109.84	113.606	110.216	79.7371	108.961	87.7463	108.333	146.871	136.452	-0.187247	0.471252
F5H0R1	TUT1	Speckle targeted PIP5K1A-regulated poly(A) polymerase	0.950642	0.337897	96.8	96.9	95.2		109	103.8	107.1	89.4	97.2	-0.0730265	0.471215
Q5VZU9	TPP2	Tripeptidyl-peptidase 2	1.08079	0.338068	117.561	106.709	103.494	97.9368	98.3697	93.0442	121.48	92.4414	87.0155	0.112085	0.470997
Q9UEU0	VTI1B	Vesicle transport through interaction with t-SNAREs homolog 1B	0.857144	0.338342	86.6721	77.5192	80.9749	95.9937	129.915	123.564	95.1712	75.4645	73.4098	-0.22239	0.470644
Q9HAU5	UPF2	Regulator of nonsense transcripts 2	1.06735	0.338346	89.1186	116.233	106.165	109.057	103.274	84.5331	101.181	103.473	100.084	0.0940297	0.470639
Q9Y6X4	FAM169A	Soluble lamin-associated protein of 75 kDa	0.950569	0.338671	87.6911	94.0112	91.2461	91.8675	105.17	100.134	100.825	83.8398	89.7649	-0.0731365	0.470222
Q9Y5Q9	GTF3C3	General transcription factor 3C polypeptide 3	1.06852	0.338718	92.9376	109.222	107.931	118.366	100.682	104.158	84.1006	103.165	109.122	0.0956103	0.470161
P84103	SRSF3	Serine/arginine-rich splicing factor 3	0.746887	0.338872	74.1451	57.9259	57.0677	90.2125	130.011	139.966	99.9758	49.001	48.5719	-0.421039	0.469964
P49795	RGS19	Regulator of G-protein signaling 19	1.15328	0.339046	96.5	101.4	114.8		87.7	70.3	69.4	115	109.5	0.205741	0.469741
Q9HCJ3	RAVER2	Ribonucleoprotein PTB-binding 2	1.14451	0.33905	87.3019	106.369	112.273	110.833	69.4931	64.1698	97.4646	107.047	117.016	0.194734	0.469736
Q9Y5V3	MAGED1	Melanoma-associated antigen D1	0.906924	0.339341	86.7666	111.557	117.172	102.574	110.498	133.063	88.1439	122.999	121.516	-0.140946	0.469364
A0A0J9YWL0	CRYBG1	Beta/gamma crystallin domain-containing protein 1	1.12607	0.339395	126.757	136.526	137.467	87.2876	89.6832	91.0956	122.402	118.518	120.048	0.171298	0.469294
P33527	ABCC1	Multidrug resistance-associated protein 1	1.0768	0.339657	106.107	95.6529	92.9172	111.008	105.033	102.492	100.636	81.0949	81.6811	0.106757	0.468959
Q96RR4	CAMKK2	Calcium/calmodulin-dependent protein kinase kinase 2	0.873406	0.339703	100.098	79.5987	83.1986	85.3432	124.798	115.398	107.298	73.6988	77.1987	-0.195275	0.4689
A0A8I5KS41	EMC3	ER membrane protein complex subunit 3	1.12488	0.33975	89.1043	100.3	98.2645	135.989	79.6665	82.7199	93.5456	101.133	113.717	0.169769	0.468841
Q8TAA5	GRPEL2	GrpE protein homolog 2, mitochondrial	0.816596	0.339916	78.6217	108.247	123.858	75.0821	107.564	102.436	71.2154	148.926	160.434	-0.292305	0.468628
P30419	NMT1	Glycylpeptide N-tetradecanoyltransferase 1	0.928061	0.340077	97.2661	92.5435	96.2613	92.0887	110.731	120.98	87.7204	99.2758	90.6343	-0.107708	0.468423
Q7Z7K6	CENPV	Centromere protein V	0.90554	0.340106	90.2894	100.379	103.673	88.8615	118.19	128.897	82.0532	100.688	99.1433	-0.14315	0.468386
Q9H8H2	DDX31	Probable ATP-dependent RNA helicase DDX31	0.934667	0.340304	108.325	79.445	83.5997	101.267	103.461	97.381	103.664	98.3943	95.4557	-0.0974762	0.468133
Q8NG31	KNL1	Kinetochore scaffold 1	1.12971	0.340603	90.6357	119.569	113.969	112.2	79.5396	70.3101	104.324	104.843	123.82	0.175951	0.467751
Q9H1K1	ISCU	Iron-sulfur cluster assembly enzyme ISCU, mitochondrial	1.24524	0.340692	115.462	97.6419	81.2136	115.567	84.6477	74.438	142.75	52.1623	57.4528	0.316425	0.467638
O00743	PPP6C	Serine/threonine-protein phosphatase 6 catalytic subunit	1.07049	0.340697	113.751	106.468	100.417	98.8053	92.6213	89.8519	117.443	88.621	101.237	0.0982777	0.467631
Q15652	JMJD1C	Probable JmjC domain-containing histone demethylation protein 2C	1.11618	0.34115	78.5498	95.2061	105.9	111.61	111.768	79.023	93.0295	79.2123	75.1428	0.158571	0.467055
Q9C0H2	TTYH3	Protein tweety homolog 3	0.909259	0.341163	93.0363	91.6159	95.5727	98.7417	120.836	126.213	86.6445	96.08	91.21	-0.137237	0.467037
A0A8Q3WKR8	IDI1	Isopentenyl-diphosphate Delta-isomerase 1	0.880388	0.341309	108.878	89.6348	84.1656	87.1176	121.032	122.855	119.614	83.6592	77.8861	-0.183788	0.466853
P45974	USP5	Ubiquitin carboxyl-terminal hydrolase 5	1.02938	0.341311	99.58	105.633	106.138	102.99	99.2773	106.34	92.7193	102.304	102.506	0.0417699	0.46685
Q9BV68	RNF126	E3 ubiquitin-protein ligase RNF126	0.846649	0.341515	87.0898	104.755	113.307	85.3551	95.9788	99.5794	84.5019	134.573	161.915	-0.240164	0.46659
I3L4J1	I3L4J1	Vesicle-fusing ATPase (Fragment)	1.05516	0.341568	100	103.9	104.1		92.9	84.7	99.8	103.2	105.9	0.0774561	0.466522
Q96J84	KIRREL1	Kin of IRRE-like protein 1	1.04844	0.342055	104.1	101.9	101.8		103.4	90.4	105	88.8	101.7	0.0682395	0.465903
Q07065	CKAP4	Cytoskeleton-associated protein 4	1.14152	0.342161	113.916	99.3238	91.698	106.54	102.619	93.1102	120.695	65.9962	68.1615	0.190956	0.465769
Q9UGQ2	CACFD1	Calcium channel flower homolog	0.804922	0.342433	77.9774	78.0712	76.3822	86.9116	139.252	139.44	78.165	77.3205	61.7438	-0.313079	0.465425
Q7Z4Q2	HEATR3	HEAT repeat-containing protein 3	0.804369	0.342611	83.7065	100.562	124.364	84.3237	101.245	94.7535	80.7455	150.216	183.699	-0.314071	0.465199
Q12980	NPRL3	GATOR complex protein NPRL3	0.820209	0.342738	80.3029	78.8093	70.0234	102.583	138.905	129.152	101.038	70.3749	66.0698	-0.285937	0.465038
Q9BVL2	NUP58	Nucleoporin p58/p45	1.05927	0.342827	109.286	93.2028	89.6181	98.3672	87.6804	86.7115	102.407	85.9365	98.047	0.0830684	0.464925
Q9H4G4	GLIPR2	Golgi-associated plant pathogenesis-related protein 1	1.06109	0.34284	107.651	104.509	97.6156	93.5254	97.1088	84.8435	110.692	91.635	90.8241	0.085542	0.464908
P46109	CRKL	Crk-like protein	0.935186	0.342871	81.8334	91.6917	92.9359	96.2259	108.345	108.441	84.0347	92.3616	91.5959	-0.0966747	0.464869
B9EGE7	ZNF507	ZNF507 protein	1.06718	0.342921	96	113.3	106.5		102.8	97	107.3	84.2	101.9	0.093804	0.464807
Q9NWY4	HPF1	Histone PARylation factor 1	1.11977	0.343057	120.745	93.4621	88.2698	109.467	90.4411	82.6998	121.69	80.2452	84.7767	0.163208	0.464633
Q15392	DHCR24	Delta(24)-sterol reductase	0.914634	0.343155	99.4439	109.303	113.268	92.1439	111.446	109.624	87.8707	127.305	129.77	-0.128734	0.464509
P61586	RHOA	Transforming protein RhoA	0.874165	0.343428	102.481	106.8	119.873	85.0213	110.535	111.002	82.522	145.085	143.1	-0.194022	0.464164
Q7L592	NDUFAF7	Protein arginine methyltransferase NDUFAF7, mitochondrial	1.16221	0.343474	125.349	168.622	138.524	93.1369	98.7558	95.2504	151.7	102.866	116.766	0.216868	0.464106
Q7KZ85	SUPT6H	Transcription elongation factor SPT6	0.843862	0.343515	79.7129	74.9553	72.6213	100.014	126.392	123.34	94.4346	71.1851	69.4795	-0.244921	0.464054
Q460N5	PARP14	Protein mono-ADP-ribosyltransferase PARP14	0.836062	0.343661	90.7	84.3	85.4		99.4	92.8	66.1	123.9	136.9	-0.258317	0.46387
Q5TA45	INTS11	Integrator complex subunit 11	1.08747	0.343815	89.3203	88.7876	91.9839	119.446	83.4603	88.5212	80.7967	93.5821	101.395	0.120978	0.463676
P61981	YWHAG	14-3-3 protein gamma	1.17539	0.343943	129.262	125.769	139.743	106.636	75.2283	77.9068	93.3949	139.627	147.08	0.233144	0.463514
P35251	RFC1	Replication factor C subunit 1	0.865515	0.344104	79.3065	73.1713	71.6375	97.1149	119.817	108.358	94.1933	70.8254	70.7352	-0.20837	0.46331
Q9P2J5	LARS1	Leucine--tRNA ligase, cytoplasmic	0.92335	0.344149	99.2277	112.133	112.35	90.7616	110.072	107.47	92.2872	126.231	125.038	-0.11505	0.463253
Q96GA3	LTV1	Protein LTV1 homolog	1.06125	0.344348	88.8697	98.1309	95.5115	112.927	96.9147	101.686	94.5761	86.0633	86.531	0.0857646	0.463003
E7EV07	ARHGEF4	Rho guanine nucleotide exchange factor 4	0.781833	0.34459	67	97.7	107.8		109.7	91.5	69	152.1	158.6	-0.355068	0.462697
Q8IUH4	ZDHHC13	Palmitoyltransferase ZDHHC13	0.907532	0.344606	98.9	90.6	85.7		119.6	109.4	103.4	85.4	87.6	-0.13998	0.462677
Q9BQ70	TCF25	Transcription factor 25	1.06322	0.344696	109.8	105.241	97.4128	108.49	96.62	94.638	118.719	91.566	93.3498	0.0884412	0.462563
M0QYN0	MYDGF	Myeloid-derived growth factor	1.15737	0.344862	113.999	85.1388	79.2764	110.639	82.6135	82.0723	118.328	74.2258	62.9522	0.210848	0.462355
Q13888	GTF2H2	General transcription factor IIH subunit 2	0.929975	0.346129	91.4	99.8	102.3		102	102.7	89.9	110.8	120.6	-0.104737	0.460762
A0A8C8KCK5	ACSL5	Arachidonate--CoA ligase	1.10424	0.346272	122.801	96.6242	90.6574	101.994	101.34	100.955	108.847	78.9162	76.414	0.143051	0.460583
P18615	NELFE	Negative elongation factor E	1.08798	0.346614	97.5572	93.357	96.5071	96.4272	92.7843	83.6204	111.78	72.261	80.5658	0.121648	0.460154
Q8IXI2	RHOT1	Mitochondrial Rho GTPase 1	1.19237	0.346824	121	107.5	95.8		68.7	73.3	136.6	82.3	92.4	0.253828	0.459891
A0A499FJE1	BOLA2B	BolA-like protein 2	1.20631	0.34724	94.2394	72.5167	68.3175	131.437	85.3565	81.5611	97.6311	58.3041	56.9313	0.270602	0.45937
A0A7P0TA70	AAR2	Protein AAR2 homolog	0.904895	0.347565	85.8738	92.4493	92.94	104.784	123.56	121.205	81.4574	93.7251	99.5155	-0.144178	0.458964
Q9NUQ2	AGPAT5	1-acyl-sn-glycerol-3-phosphate acyltransferase epsilon	1.1428	0.347859	146.645	122.223	117.225	84.1344	99.1645	92.0083	135.059	95.9839	92.1219	0.192574	0.458597
Q9Y385	UBE2J1	Ubiquitin-conjugating enzyme E2 J1	1.14356	0.348034	127.276	106.063	96.9008	108.178	79.373	72.5013	134.546	89.0332	103.772	0.19353	0.458378
O43524	FOXO3	Forkhead box protein O3	1.2123	0.348103	110.159	168.919	171.573	103.193	78.9091	87.355	103.885	162.162	138.755	0.277751	0.458292
Q99622	C12orf57	Protein C10	1.05513	0.348154	120.664	101.517	107.514	101.867	96.7835	98.2562	115.509	103.516	97.2043	0.0774144	0.458229
Q8NE86	MCU	Calcium uniporter protein, mitochondrial	1.16466	0.348412	141.94	102.501	92.4914	101.6	103.202	96.2951	127.926	73.2724	69.9691	0.219912	0.457907
Q13630	GFUS	GDP-L-fucose synthase	0.864253	0.348522	79.8842	70.6527	68.7333	92.7848	114.799	98.2557	104.38	66.9053	66.9967	-0.210475	0.457769
P13693	TPT1	Translationally-controlled tumor protein	1.0734	0.348527	97.7058	83.9702	88.274	116.532	93.6767	93.0357	85.9848	87.4499	89.9223	0.102181	0.457764
Q93096	PTP4A1	Protein tyrosine phosphatase type IVA 1	1.26196	0.348564	75.4715	93.5532	94.7761	183.041	86.0409	79.577	65.7755	99.1436	112.072	0.335662	0.457717
A0A5F9ZHN7	SACM1L	Phosphatidylinositol-3-phosphatase SAC1	0.875446	0.348635	75.949	98.2869	104.74	94.1981	110.3	104.442	67.9073	119.632	130.553	-0.19191	0.457629
Q9UKV3	ACIN1	Apoptotic chromatin condensation inducer in the nucleus	0.88148	0.348673	82.7137	80.2699	82.7137	90.8177	124.446	113.449	78.014	79.5179	81.7738	-0.182	0.457582
Q8NFI3	ENGASE	Cytosolic endo-beta-N-acetylglucosaminidase	1.12246	0.349139	98.5516	114.233	118.589	103.09	87.2264	85.3751	71.763	121.529	117.935	0.166664	0.457002
P21796	VDAC1	Voltage-dependent anion-selective channel protein 1	1.03446	0.3498	100.135	104.362	104.965	103.048	105.972	104.664	89.6685	97.7195	100.437	0.0488793	0.45618
Q9Y2V2	CARHSP1	Calcium-regulated heat-stable protein 1	1.19025	0.349813	70.9366	77.4504	80.7867	130.793	81.2634	78.2448	96.9918	60.2127	61.3248	0.251262	0.456164
P50395	GDI2	Rab GDP dissociation inhibitor beta	1.0527	0.350031	116.677	112.975	106.205	94.1573	99.6462	103.983	109.484	104.618	92.8762	0.074096	0.455893
A0A0A0MRJ6	PCMT1	Protein-L-isoaspartate O-methyltransferase	1.15601	0.35021	94.5659	94.1099	86.8146	117.594	102.956	98.5783	101.588	72.3151	49.6083	0.209153	0.455671
O60343	TBC1D4	TBC1 domain family member 4	0.949234	0.350218	90.0447	98.3983	94.1244	102.331	108.015	112.386	89.7533	100.341	96.3585	-0.0751645	0.455662
Q96B23	C18orf25	Uncharacterized protein C18orf25	0.841212	0.350304	70.0043	87.2001	95.9507	110.515	98.9014	96.7647	68.2745	131.156	145.3	-0.249459	0.455555
Q92805	GOLGA1	Golgin subfamily A member 1	1.18422	0.350471	98.4754	89.384	87.5837	138.578	102.706	99.5556	111.798	60.7595	62.1997	0.243938	0.455348
A0A7N4I394	PRPF40A	Pre-mRNA-processing factor 40 homolog A	0.921307	0.350561	86.5433	76.9071	77.4526	95.1141	96.543	96.7248	104.088	73.4527	85.0888	-0.118247	0.455237
Q9Y217	MTMR6	Myotubularin-related protein 6	0.677568	0.350621	49.6298	51.3356	60.6767	99.5851	173.664	142.96	64.4132	49.5486	51.3356	-0.561563	0.455162
Q6PJG6	BRAT1	BRCA1-associated ATM activator 1	1.06467	0.350685	117.029	113.56	109.249	99.6252	95.6845	90.2168	120.289	104.727	105.043	0.0904096	0.455082
Q969S3	ZNF622	Cytoplasmic 60S subunit biogenesis factor ZNF622	0.92898	0.351042	96.0036	112.405	112.733	97.1966	106.282	115.576	92.3952	122.246	126.401	-0.106281	0.454641
Q5T124	UBXN11	UBX domain-containing protein 11	0.901698	0.351594	107.1	85.9	82		98.3	96.6	125.4	97.1	90.9	-0.149283	0.453959
O95168	NDUFB4	NADH dehydrogenase [ubiquinone] 1 beta subcomplex subunit 4	1.13108	0.351637	103.526	85.6617	75.7274	111.45	79.3874	73.8974	110.672	83.0474	68.9303	0.177706	0.453905
O15371	EIF3D	Eukaryotic translation initiation factor 3 subunit D	0.913444	0.351917	97.2573	91.3541	89.6122	92.6907	117.58	119.515	101.902	84.58	83.9993	-0.130612	0.45356
P54578	USP14	Ubiquitin carboxyl-terminal hydrolase 14	1.03669	0.352005	101.149	99.1542	101.748	106.469	90.1764	93.7675	98.8549	103.843	105.937	0.0519797	0.453451
Q9BRX2	PELO	Protein pelota homolog	1.11862	0.352047	148.459	118.88	112.106	91.5606	95.8493	101.268	129.041	105.333	94.8332	0.161722	0.453399
Q8IVL6	P3H3	Prolyl 3-hydroxylase 3	1.49558	0.352049	262.35	179.533	126.687	82.6007	72.3925	82.9618	256.993	65.5876	66.3115	0.580704	0.453397
Q8IWR0	ZC3H7A	Zinc finger CCCH domain-containing protein 7A	1.03354	0.352391	103.392	94.0735	96.0561	104.821	98.6334	91.2979	102.797	94.3709	94.6683	0.0475997	0.452975
Q8IY33	MICALL2	MICAL-like protein 2	1.12012	0.352587	80.7	110.3	111.5		98.8	93.2	71.4	104.1	82.6	0.163655	0.452733
A0A3B3IS55	ABLIM1	Actin-binding LIM protein 1	1.14289	0.35285	120.029	130.031	131.009	109.793	75.8877	84.0418	104.373	126.661	145.904	0.192681	0.45241
Q13190	STX5	Syntaxin-5	1.08445	0.35336	105.291	92.8051	91.5271	122.159	104.602	102.833	98.9004	83.9572	84.3504	0.116964	0.451783
P11279	LAMP1	Lysosome-associated membrane glycoprotein 1	0.924836	0.353567	107.126	91.4693	92.7054	83.5045	107.95	117.015	102.594	94.6625	84.3619	-0.11273	0.451529
Q9Y4F5	CEP170B	Centrosomal protein of 170 kDa protein B	1.13586	0.354038	82.6217	80.9287	79.9128	123.23	92.5262	83.7222	89.9866	64.0826	73.2252	0.183781	0.45095
Q14C86	GAPVD1	GTPase-activating protein and VPS9 domain-containing protein 1	1.09555	0.354061	88.6492	89.0156	89.6566	124.851	101.287	90.0229	83.7955	87.2755	85.0776	0.13166	0.450922
Q13131	PRKAA1	5'-AMP-activated protein kinase catalytic subunit alpha-1	1.24149	0.354219	169.67	127.195	109.698	83.5475	85.5256	75.7414	161.727	87.9428	82.5328	0.312073	0.450728
O75781	PALM	Paralemmin-1	1.12087	0.354372	115.008	104.657	104.139	95.8538	90.164	73.7047	128.362	96.7892	78.9841	0.16462	0.45054
O96017	CHEK2	Serine/threonine-protein kinase Chk2	0.903896	0.354563	83.7269	92.1187	90.0208	113.674	114.242	118.438	76.4795	109.665	106.041	-0.145771	0.450306
Q8N668	COMMD1	COMM domain-containing protein 1	0.919733	0.354622	90.5968	105.416	104.155	97.8584	115.611	123.704	80.8225	109.725	111.091	-0.120713	0.450235
O00716	E2F3	Transcription factor E2F3	0.935621	0.354762	87.15	94.1429	105.415	98.5098	105.833	96.9609	86.5238	109.799	115.539	-0.0960032	0.450063
Q9BY12	SCAPER	S phase cyclin A-associated protein in the endoplasmic reticulum	0.826503	0.354939	84.5	84	85.6		148.9	114.4	90.5	82.8	75.8	-0.274909	0.449846
P47929	LGALS7B	Galectin-7	1.19133	0.35549	117.837	80.9046	73.0426	133.617	86.2982	66.1863	119.3	79.259	74.3225	0.252575	0.449172
A8MUS3	RPL23A	60S ribosomal protein L23a	0.958145	0.355571	92.0161	101.702	101.208	98.2644	104.766	113.068	92.115	99.6265	103.382	-0.0616839	0.449073
A0A8I5KSL3	SMG7	Nonsense-mediated mRNA decay factor SMG7	1.33424	0.355575	65.4414	70.4261	75.5532	182.911	73.2033	68.0762	71.4942	71.7791	84.8816	0.416021	0.449068
Q99973	TEP1	Telomerase protein component 1	0.887667	0.355934	88.9	97.3	94.8		119.5	132.6	85.9	94.8	94.8	-0.171909	0.448631
A0A0D2X7Z3	CRY2	Cryptochrome-2	0.938697	0.356002	102.4	95.3	86.5		99.5	93	115.4	95.5	101.2	-0.0912681	0.448548
Q96D53	COQ8B	Atypical kinase COQ8B, mitochondrial	1.18479	0.356046	84.499	77.2538	87.3633	144.791	72.9572	70.0929	74.8949	96.4619	101.18	0.244634	0.448494
P98175	RBM10	RNA-binding protein 10	1.19951	0.356145	108.248	93.8688	85.0065	107.811	83.5595	79.6709	133.659	54.0786	60.5897	0.262445	0.448374
O75817	POP7	Ribonuclease P protein subunit p20	0.905245	0.356294	99.4	88.8	90		115.2	122.2	96.8	84.1	93.9	-0.143619	0.448191
O43615	TIMM44	Mitochondrial import inner membrane translocase subunit TIM44	0.959651	0.356661	94.6581	97.1413	95.0554	99.9106	108.266	108.464	100.32	96.6446	90.0891	-0.0594176	0.447745
O00299	CLIC1	Chloride intracellular channel protein 1	1.0813	0.356685	100.428	84.6157	87.4393	106.769	99.9575	96.3809	88.5688	79.3448	74.1681	0.11277	0.447715
Q09161	NCBP1	Nuclear cap-binding protein subunit 1	1.07022	0.356715	111.563	91.6968	89.7395	115.965	105.985	94.4369	88.4673	91.7946	96.9813	0.097904	0.447678
L0R8F8	MIEF1	MIEF1 upstream open reading frame protein	1.12987	0.356826	119.36	101.133	85.0613	113.071	88.4912	88.9812	127.396	82.8074	75.4576	0.17616	0.447544
P07384	CAPN1	Calpain-1 catalytic subunit	0.954578	0.356865	95.484	92.6728	90.7341	98.6516	107.698	108.28	92.6728	95.0963	90.6371	-0.0670656	0.447495
Q330K2	NDUFAF6	NADH dehydrogenase (ubiquinone) complex I, assembly factor 6	0.879992	0.356927	85.1545	85.0574	98.8452	104.03	87.4848	94.3787	84.1835	130.111	133.8	-0.184438	0.447421
Q14012	CAMK1	Calcium/calmodulin-dependent protein kinase type 1	0.929523	0.357127	102.6	98	98		112.1	115.8	120.1	92.9	94.5	-0.105437	0.447177
Q9NRV9	HEBP1	Heme-binding protein 1	1.10548	0.357259	88.1157	89.8241	84.7889	115.143	91.8921	85.0587	103.581	78.6748	68.0649	0.144673	0.447017
Q9Y281	CFL2	Cofilin-2	1.17114	0.357303	132.46	116.599	100.632	101.845	90.6529	84.0352	150.003	78.783	78.4678	0.227912	0.446964
Q9GZU8	PSME3IP1	PSME3-interacting protein	0.624535	0.357332	67.3998	38.1447	38.2255	83.7975	157.993	143.366	110.636	22.9515	20.527	-0.679145	0.446929
P0CG08	GPR89B	Golgi pH regulator B	0.930099	0.357373	87.1225	116.128	114.858	98.6532	120.68	110.2	96.8616	121.739	110.623	-0.104543	0.446879
P24534	EEF1B2	Elongation factor 1-beta	0.90937	0.3575	90.8221	91.1139	94.0311	89.1307	110.367	119.119	110.465	82.8485	79.0561	-0.137061	0.446724
Q9UNM6	PSMD13	26S proteasome non-ATPase regulatory subunit 13	1.04506	0.357646	112.816	97.286	98.1878	101.323	95.2822	95.4826	91.5751	108.107	99.4903	0.063592	0.446547
Q12849	GRSF1	G-rich sequence factor 1	1.05692	0.357762	105.068	114.299	114.195	99.0555	90.236	94.6959	112.536	103.616	110.565	0.0798674	0.446406
Q9H1I8	ASCC2	Activating signal cointegrator 1 complex subunit 2	0.94529	0.358208	95.8374	105.39	106.74	98.8523	105.702	103.21	92.7225	116.085	120.238	-0.0811718	0.445865
P61457	PCBD1	Pterin-4-alpha-carbinolamine dehydratase	1.16595	0.358355	139.73	92.7652	98.9002	102.035	68.0137	63.9943	114.343	112.968	105.353	0.221512	0.445686
O14530	TXNDC9	Thioredoxin domain-containing protein 9	0.92958	0.358544	117.063	109.319	115.716	81.411	118.298	107.298	106.849	123.46	113.584	-0.105349	0.445457
P62993	GRB2	Growth factor receptor-bound protein 2	1.07163	0.358594	100.779	92.7653	88.523	113.392	101.25	96.6305	98.8931	81.641	82.8666	0.0998077	0.445398
Q9UJX4	ANAPC5	Anaphase-promoting complex subunit 5	1.06712	0.358818	95.5482	114.879	115.987	104.723	109.04	91.8229	86.8895	108.536	108.738	0.0937182	0.445126
Q15648	MED1	Mediator of RNA polymerase II transcription subunit 1	1.0833	0.35888	126.711	110.706	103.481	92.5757	96.145	82.9181	112.039	102.036	107.038	0.115436	0.44505
O95926	SYF2	Pre-mRNA-splicing factor SYF2	0.865035	0.358949	84.3878	79.1194	80.4365	92.6464	125.218	121.643	95.6771	73.9451	69.8998	-0.209169	0.444967
P47755	CAPZA2	F-actin-capping protein subunit alpha-2	0.867008	0.359457	90.9163	79.5046	76.581	88.9698	122.416	120.719	98.2726	75.072	67.9043	-0.205883	0.444353
O00291	HIP1	Huntingtin-interacting protein 1	1.12871	0.359821	132.831	109.707	95.1902	98.0328	104.834	84.7172	128.268	80.7769	83.9914	0.174675	0.443913
P42766	RPL35	60S ribosomal protein L35	1.21184	0.359839	117.777	74.3548	72.0076	127.98	88.3539	82.8213	113.754	69.8281	49.7096	0.277202	0.443891
P09669	COX6C	Cytochrome c oxidase subunit 6C	0.834592	0.359991	133.935	121.456	112.807	69.5223	102.675	85.9951	170.26	135.912	160.747	-0.260856	0.443708
M0R2C6	M0R2C6	Serine--tRNA ligase (Fragment)	1.06676	0.360129	93.8	110.7	110.6		97.6	101.1	83.8	104.4	105.4	0.0932376	0.443542
Q9NVH6	TMLHE	Trimethyllysine dioxygenase, mitochondrial	1.10073	0.360481	117.2	96.7	100.8		93.8	84.6	117	100.3	80.8	0.138467	0.443118
P20962	PTMS	Parathymosin	0.760901	0.360603	60.1014	51.9454	51.9454	102.418	126.854	124.954	79.2642	55.1919	51.3911	-0.394219	0.442971
P30084	ECHS1	Enoyl-CoA hydratase, mitochondrial	0.931619	0.360875	95.3035	86.8626	95.3035	92.38	107.474	116.995	90.0034	97.7572	84.0163	-0.102188	0.442643
Q96T76	MMS19	MMS19 nucleotide excision repair protein homolog	0.908235	0.360876	95.0229	106.82	112.183	101.631	105.212	109.18	88.159	136.207	133.311	-0.138863	0.442642
Q14249	ENDOG	Endonuclease G, mitochondrial	1.21327	0.361048	84.2112	71.6642	67.5075	131.356	69.3549	63.3508	105.995	63.0429	63.7357	0.278895	0.442435
P26440	IVD	Isovaleryl-CoA dehydrogenase, mitochondrial	1.07987	0.361073	91.4911	101.689	99.9409	128.672	91.394	94.4048	91.5882	103.826	107.031	0.110862	0.442405
Q9P1U1	ACTR3B	Actin-related protein 3B	0.701452	0.361141	70.3	78.8	82.8		71.8	58.2	79.9	169.3	171.8	-0.511584	0.442323
P52597	HNRNPF	Heterogeneous nuclear ribonucleoprotein F	0.944052	0.361441	92.9745	94.6209	93.265	91.0766	105.758	108.664	105.081	85.7108	87.2604	-0.0830617	0.441962
Q15814	TBCC	Tubulin-specific chaperone C	1.25255	0.361463	118.318	76.589	71.0079	126.417	96.509	90.6704	113.853	49.8859	40.6128	0.324874	0.441937
Q9H0J9	PARP12	Protein mono-ADP-ribosyltransferase PARP12	1.26029	0.361632	152.266	86.6085	73.0467	106.393	57.3337	49.9449	128.697	96.6162	82.3061	0.333761	0.441734
Q99496	RNF2	E3 ubiquitin-protein ligase RING2	0.876191	0.361687	94.9636	91.2921	88.4144	92.4461	130.984	133.664	97.4444	82.0636	79.5829	-0.190682	0.441667
Q9BXS5	AP1M1	AP-1 complex subunit mu-1	1.07384	0.361687	89.0377	108.051	103.043	107.097	101.002	102.579	73.8271	99.9819	96.643	0.102777	0.441667
P22694	PRKACB	cAMP-dependent protein kinase catalytic subunit beta	0.757159	0.362091	55.4452	56.8079	61.9181	91.8236	128.776	133.801	67.4541	63.1105	45.9914	-0.401331	0.441182
Q9Y3C1	NOP16	Nucleolar protein 16	1.22518	0.362363	83.5328	174.591	144.597	75.2462	102.669	111.915	91.7033	108.367	72.9971	0.29299	0.440857
Q8N0Z9	VSIG10	V-set and immunoglobulin domain-containing protein 10	0.887198	0.362586	87.4	95.7	100.2		124	128	90.2	83	107	-0.172672	0.440589
Q14157	UBAP2L	Ubiquitin-associated protein 2-like	1.20235	0.362765	115.16	100.753	85.7928	107.086	83.9458	80.9906	140.556	57.0721	62.4284	0.265857	0.440374
Q6PCB7	SLC27A1	Long-chain fatty acid transport protein 1	1.28463	0.362867	149	101.5	90.8		66.7	66.6	152.9	86.8	69.8	0.361351	0.440253
Q96SB8	SMC6	Structural maintenance of chromosomes protein 6	0.919658	0.362894	98.9921	104.096	109.731	97.8044	101.438	94.42	106.648	115.898	139.716	-0.12083	0.44022
Q86SX3	TEDC1	Tubulin epsilon and delta complex protein 1	1.08982	0.363333	90.189	92.7713	103.292	116.829	100.231	86.7459	71.826	100.518	103.005	0.124086	0.439695
[truncated: 3,389 more rows]
