# Supplementary material for: p53-induced RNA-binding protein ZMAT3 inhibits transcription of a hexokinase to suppress mitochondrial respiration in human cancer cells
Source: eLife. 2026 Mar 17;14:RP107538. doi: 10.7554/eLife.107538 (PMC12995290; doi:10.7554/eLife.107538)
Supplement: Supplementary file 3. [file elife-107538-supp3.xlsx]

## Sheet: RNA-seq siCTL vs siZMAT3
Supplementary File 3. ZMAT3-regulated genes were identified by analyzing our previously published RNA-seq data from siCTRL and siZMAT3 transfected HCT116 cells in presence and absence of Nutlin-3 treatment {Muys, 2021 #93}. P<0.05 was used as cut-off.
Gene	Symbol	siCTL_1	siCTL_2	siCTL_3	siZMAT3_1	siZMAT3_2	siZMAT3_3	siCTL_1-Nutlin	siCTL_2-Nutlin	siCTL_3-Nutlin	siZMAT3_1_Nutlin	siZMAT3_2_Nutlin	siZMAT3_3_Nutlin	log FC (siZMAT3/siCTL)	FC (siZMAT3/siCTL)	p-value	adj.p-value	#-log10 p value	log FC (siCTL-Nutlin/siCTL-Untr)	FC (siCTL-Nutlin/siCTL-Untr)	p-value	adj.p-value	log FC (siZMAT3-Nutlin/siCTL-Untr)	FC (siZMAT3-Nutlin/siCTL-Untr)	p-value	adj-p-value
ENSG00000188725	C5orf43	4.81771	4.90596	5.03481	6.61504	6.67345	6.60035	5.03522	5.06295	4.97032	6.59768	6.63551	6.49049	1.71044	3.2726	1.80827e-15	2.74152e-11	14.7427	0.103582	1.07444	0.147459	0.337862	1.65561	3.15057	3.13478e-15	7.92106e-12
ENSG00000121644	DESI2	5.48963	5.47661	5.67848	7.0344	7.02433	7.10086	5.96491	5.92007	5.93066	7.31344	7.28991	7.42181	1.50521	2.83866	5.84465e-14	3.53337e-10	13.2332	0.390598	1.31094	4.42471e-05	0.000806429	1.79359	3.46676	2.62862e-15	7.92106e-12
ENSG00000172667	ZMAT3	5.61015	5.52108	5.85648	1.13955	1.44639	1.55318	6.80318	7.00739	7.07362	2.13679	2.26806	2.92405	-4.28255	0.0513834	6.9917e-14	3.53337e-10	13.1554	1.29941	2.46128	3.41956e-08	2.96251e-06	-3.22131	0.107224	2.45664e-12	1.09544e-09
ENSG00000128510	CPA4	3.56189	3.80373	3.43841	5.44975	5.48428	5.19141	3.69449	3.6545	3.85452	5.67477	5.53246	5.47893	1.77345	3.4187	1.85259e-12	7.02177e-09	11.7322	0.13264	1.0963	0.243851	0.469749	1.96045	3.89184	3.08059e-13	3.11365e-10
ENSG00000184787	UBE2G2	5.11541	5.09655	5.27154	6.4659	6.52234	6.56326	5.29001	5.1763	5.18213	6.58609	6.5233	6.50596	1.35623	2.56016	3.53326e-12	1.07135e-08	11.4518	0.0552301	1.03902	0.521759	0.731837	1.37772	2.59857	2.62276e-12	1.1361e-09
ENSG00000110987	BCL7A	5.26315	5.28704	5.25385	4.1792	4.14158	4.15259	5.17543	5.1738	5.20537	4.39486	4.35843	4.44385	-1.11025	0.463214	5.01534e-12	1.1736e-08	11.2997	-0.0831741	0.943979	0.198045	0.411873	-0.869214	0.547445	1.76219e-10	2.12037e-08
ENSG00000147676	MAL2	7.60952	7.66431	7.72172	8.50062	8.594	8.60377	7.40216	7.3432	7.23892	8.35825	8.35825	8.27656	0.900971	1.86732	5.41863e-12	1.1736e-08	11.2661	-0.337076	0.791644	1.4835e-05	0.000348162	0.666025	1.5867	7.11609e-10	6.16497e-08
ENSG00000183741	CBX6	7.56005	7.47276	7.48133	6.64915	6.66408	6.53726	7.53518	7.5237	7.65872	6.7937	6.83571	6.77099	-0.887799	0.540438	9.0693e-12	1.37724e-08	11.0424	0.0678522	1.04816	0.219592	0.439967	-0.704522	0.613646	3.03718e-10	3.19769e-08
ENSG00000121579	NAA50	7.42342	7.40216	7.64035	8.36194	8.43349	8.40388	7.45417	7.40274	7.46302	8.18006	8.25035	8.18212	0.91136	1.88082	9.3876e-12	1.37724e-08	11.0274	-0.0484155	0.966998	0.4202	0.648949	0.715808	1.6424	4.63197e-10	4.41668e-08
ENSG00000101367	MAPRE1	8.18987	8.18006	8.21864	7.45726	7.50408	7.49351	8.16083	8.19773	8.15646	7.54827	7.63385	7.5211	-0.711223	0.610802	9.91418e-12	1.37724e-08	11.0037	-0.0244831	0.983173	0.581341	0.776401	-0.628327	0.646926	6.69833e-11	1.09197e-08
ENSG00000196663	TECPR2	3.61474	3.56546	3.59572	4.99942	4.88707	4.97987	3.78132	3.78022	3.88211	4.91193	4.96815	5.11318	1.36351	2.57311	9.99247e-12	1.37724e-08	11.0003	0.222694	1.16691	0.0260988	0.101928	1.40527	2.64867	5.7085e-12	1.84142e-09
ENSG00000168394	TAP1	6.05074	6.123	5.96422	4.61568	4.41586	4.6532	7.13549	7.11452	7.24811	6.18837	6.09168	6.36615	-1.48473	0.357317	2.79104e-11	3.52625e-08	10.5542	1.1199	2.17332	2.92487e-10	7.2695e-08	0.168768	1.1241	0.0777343	0.148057
ENSG00000168461	RAB31	5.28901	5.2048	5.39964	4.19314	4.3843	4.34547	5.06655	5.01743	5.03776	4.07697	3.98467	4.02876	-0.990019	0.503471	4.05524e-11	4.63081e-08	10.392	-0.256953	0.836853	0.000926296	0.00853194	-1.26731	0.415434	9.96807e-13	6.54697e-10
ENSG00000067560	RHOA	8.89958	8.90345	8.87315	9.58277	9.50199	9.51212	8.86539	8.86539	8.83738	9.48468	9.54568	9.44207	0.640239	1.55859	4.27619e-11	4.63081e-08	10.3689	-0.036036	0.975331	0.431723	0.658414	0.598808	1.51446	1.23219e-10	1.63871e-08
ENSG00000091527	CDV3	7.74187	7.63432	7.70119	8.45809	8.4517	8.42126	7.72825	7.77256	7.901	8.34931	8.41182	8.35614	0.751284	1.68329	5.25983e-11	5.24041e-08	10.279	0.108241	1.07791	0.057889	0.178385	0.680016	1.60216	2.56359e-10	2.77618e-08
ENSG00000112210	RAB23	3.92758	4.10941	4.01592	4.9554	5.09929	5.11632	3.84038	3.8656	3.91058	4.69737	4.67455	4.78366	1.03912	2.05497	5.53041e-11	5.24041e-08	10.2572	-0.145506	0.904062	0.0793294	0.221372	0.700491	1.62506	2.9434e-08	9.43444e-07
ENSG00000180901	KCTD2	6.59274	6.54343	6.24102	5.11318	5.17809	5.16919	6.54651	6.58186	6.56767	5.48982	5.46013	5.33437	-1.30604	0.404429	5.99663e-11	5.34793e-08	10.2221	0.105875	1.07615	0.23091	0.453417	-1.03099	0.489375	1.76826e-09	1.18622e-07
ENSG00000135148	TRAFD1	5.69364	5.75474	5.72969	4.7416	4.88895	4.8994	5.89484	5.87745	5.96982	5.03456	5.0521	5.0769	-0.882878	0.542285	7.18803e-11	5.90663e-08	10.1434	0.188035	1.13921	0.00532736	0.0318583	-0.671629	0.627797	3.83457e-09	2.00469e-07
ENSG00000177885	GRB2	6.5437	6.52529	6.43849	7.36319	7.31719	7.30837	6.64211	6.64534	6.63165	7.35213	7.32218	7.27135	0.827	1.77399	7.40228e-11	5.90663e-08	10.1306	0.13708	1.09968	0.0361882	0.12873	0.812733	1.75654	9.58254e-11	1.42596e-08
ENSG00000171951	SCG2	4.32342	4.34833	4.42262	3.26875	3.22219	3.19238	4.32553	4.33933	4.36278	3.38384	3.37396	3.19484	-1.13676	0.454779	8.0801e-11	6.12512e-08	10.0926	-0.0220501	0.984832	0.771776	0.899868	-1.04645	0.484157	2.51935e-10	2.76782e-08
ENSG00000169035	KLK7	4.15669	3.98949	3.7996	5.38839	5.37568	5.2144	4.19287	4.07301	4.10292	5.46871	5.36155	5.17552	1.34394	2.53843	1.30843e-10	9.44622e-08	9.88325	0.140468	1.10226	0.202635	0.417808	1.35354	2.55539	1.12303e-10	1.54932e-08
ENSG00000213390	ARHGAP19	6.00524	5.80567	5.94041	4.32307	4.74581	4.57196	5.51027	5.64227	5.34409	4.18598	4.27272	4.02986	-1.37022	0.386831	1.56067e-10	1.01701e-07	9.80669	-0.418211	0.748352	0.00041616	0.004705	-1.75353	0.296576	4.62055e-12	1.67438e-09
ENSG00000120889	TNFRSF10B	7.6978	7.66642	7.79483	6.59274	6.5988	6.74088	8.84402	8.89958	8.89958	7.79154	7.76074	8.03377	-1.07555	0.474491	1.58475e-10	1.01701e-07	9.80004	1.16151	2.23692	1.38701e-11	6.5714e-09	0.142058	1.10348	0.0801938	0.152034
ENSG00000138678	AGPAT9	7.05395	7.08997	6.92251	6.08967	6.16628	6.17923	6.96639	7.08045	7.00294	6.06902	6.15722	6.24676	-0.877345	0.544368	1.60994e-10	1.01701e-07	9.79319	-0.00574296	0.996027	0.928397	0.986949	-0.865015	0.549041	1.92129e-10	2.22356e-08
ENSG00000119541	VPS4B	5.47776	5.46919	5.63838	6.47078	6.5171	6.5362	5.79685	5.97999	5.95389	6.54175	6.56301	6.74708	0.979801	1.97219	1.77643e-10	1.0773e-07	9.75045	0.382131	1.30327	9.27055e-05	0.00145047	1.08868	2.12679	3.031e-11	6.25023e-09
ENSG00000035862	TIMP2	6.14092	5.99928	6.05171	7.16957	7.09346	7.11631	5.8415	5.80138	5.95781	7.00182	6.97011	6.75291	1.06253	2.08859	2.48709e-10	1.45026e-07	9.60431	-0.196986	0.872371	0.0346821	0.124875	0.84482	1.79604	9.12328e-09	3.91836e-07
ENSG00000082146	STRADB	4.01702	4.04643	3.63346	5.11496	5.09775	5.13098	3.72347	3.75674	3.63992	4.97702	4.92069	4.78124	1.21472	2.32095	2.63308e-10	1.47852e-07	9.57954	-0.193179	0.874676	0.0751857	0.213271	0.993702	1.99129	6.55665e-09	2.9787e-07
ENSG00000085491	SLC25A24	6.97011	6.92488	6.86338	5.90667	5.90718	6.04352	6.7915	6.89791	6.69155	5.84367	5.91974	6.02174	-0.967214	0.511493	2.87779e-10	1.53535e-07	9.54094	-0.125944	0.916404	0.0983961	0.256684	-0.991512	0.50295	1.91475e-10	2.22356e-08
ENSG00000078399	HOXA9	6.29366	6.4069	6.29399	5.21307	5.33613	5.39658	6.36987	6.42575	6.39768	5.60841	5.56338	5.54236	-1.01654	0.4943	2.93683e-10	1.53535e-07	9.53212	0.066143	1.04691	0.388224	0.617356	-0.760117	0.590449	1.87868e-08	6.61973e-07
ENSG00000135318	NT5E	6.87141	6.80359	6.62746	8.06244	8.07183	7.88971	6.83611	6.84451	6.44428	8.0543	8.10634	7.86369	1.24037	2.3626	3.44617e-10	1.72507e-07	9.46266	-0.0596112	0.959523	0.565125	0.764515	1.2407	2.36313	3.35855e-10	3.46388e-08
ENSG00000014824	SLC30A9	5.52179	5.6235	5.65547	6.34001	6.41905	6.46801	5.63562	5.54178	5.51858	6.1513	6.28832	6.3058	0.80876	1.75171	3.52728e-10	1.72507e-07	9.45256	-0.0348989	0.9761	0.602916	0.792004	0.648048	1.56705	1.1077e-08	4.47835e-07
ENSG00000068383	INPP5A	3.12435	2.94355	3.02781	4.23459	4.27018	4.15927	3.07733	3.05787	3.21637	4.28364	4.30142	4.01266	1.18964	2.28096	4.4227e-10	2.09539e-07	9.35431	0.0854671	1.06103	0.410881	0.63996	1.16835	2.24755	5.71974e-10	5.22983e-08
ENSG00000162623	TYW3	6.67082	6.59147	6.81968	5.72216	5.78319	5.89823	6.73041	6.73608	6.8604	5.90415	6.01694	6.04757	-0.892675	0.538614	4.68494e-10	2.15237e-07	9.3293	0.0819743	1.05847	0.245782	0.471291	-0.704412	0.613692	1.43404e-08	5.35504e-07
ENSG00000169174	PCSK9	6.13447	6.08818	5.89589	7.26366	7.09751	6.97905	6.0342	6.04757	5.93633	7.22011	7.29185	7.08091	1.0738	2.10498	5.41103e-10	2.41284e-07	9.26672	-0.0338066	0.97684	0.713574	0.86589	1.15812	2.23166	1.54697e-10	1.92243e-08
ENSG00000197885	NKIRAS1	5.44858	5.49759	5.47127	4.79368	4.82785	4.83029	5.34764	5.34344	5.39357	4.80676	4.86437	4.89749	-0.655266	0.634958	6.00438e-10	2.60093e-07	9.22153	-0.11093	0.925991	0.0455274	0.150453	-0.61653	0.652238	1.40321e-09	9.98786e-08
ENSG00000117298	ECE1	6.3058	6.33115	6.14231	7.27199	7.10293	7.08997	6.62329	6.69578	6.8071	7.50772	7.43054	7.53617	0.89507	1.8597	6.84879e-10	2.86574e-07	9.16439	0.448799	1.3649	1.32368e-05	0.000321093	1.23139	2.34793	3.5272e-12	1.33929e-09
ENSG00000100558	PLEK2	4.96135	4.92986	4.83202	6.125	5.96296	5.99152	4.83364	4.68595	4.71617	5.96944	5.86871	5.67608	1.11863	2.1714	6.99376e-10	2.86574e-07	9.15529	-0.162763	0.893313	0.11458	0.283524	0.930735	1.90625	1.23698e-08	4.87115e-07
ENSG00000149313	AASDHPPT	6.38027	6.39104	6.51583	7.03513	7.11767	7.16264	6.5107	6.50976	6.43488	6.99258	7.04081	7.07246	0.676188	1.59791	7.67476e-10	3.06203e-07	9.11494	0.0562016	1.03972	0.339323	0.57129	0.606281	1.52233	4.11525e-09	2.10781e-07
ENSG00000131873	CHSY1	5.38815	5.35085	5.39695	6.13634	6.10448	6.0339	5.50448	5.47421	5.54707	6.03744	6.04828	6.02389	0.71307	1.63929	8.62433e-10	3.35265e-07	9.06427	0.130022	1.09431	0.0472404	0.154522	0.657983	1.57788	2.96424e-09	1.65833e-07
ENSG00000117525	F3	5.02987	5.04091	4.99347	5.944	5.9346	5.81963	4.79679	4.9217	4.67155	5.74126	5.78307	5.56556	0.878029	1.83786	1.1824e-09	4.48161e-07	8.92723	-0.224914	0.855646	0.0109932	0.054449	0.675573	1.59723	6.43709e-08	1.65411e-06
ENSG00000170525	PFKFB3	6.18284	6.11255	6.14632	5.42465	5.43339	5.32932	6.0752	6.02751	6.20496	5.43632	5.36036	5.50101	-0.751324	0.594058	1.3269e-09	4.9066e-07	8.87716	-0.0445977	0.96956	0.481602	0.702224	-0.71488	0.609256	2.63517e-09	1.5481e-07
ENSG00000163171	CDC42EP3	5.13391	5.18909	5.33133	6.03088	5.97301	6.05421	5.54684	5.55262	5.58008	6.28627	6.19676	6.3555	0.801502	1.74291	1.40196e-09	5.06074e-07	8.85326	0.342034	1.26754	0.000138686	0.00200632	1.06148	2.08707	1.38423e-11	3.55701e-09
ENSG00000188215	DCUN1D3	3.98758	3.96552	4.01769	4.91402	4.74788	4.91307	4.44489	4.60915	4.50594	5.21829	5.21739	5.37171	0.868104	1.82526	1.45063e-09	5.11464e-07	8.83844	0.529858	1.44379	2.18238e-06	7.62376e-05	1.27855	2.42594	2.15718e-12	1.02203e-09
ENSG00000117133	RPF1	6.69549	6.76417	6.77099	5.79113	5.90317	5.92126	6.62404	6.53146	6.46393	5.91454	5.87922	5.78803	-0.87176	0.54648	1.55115e-09	5.34479e-07	8.80934	-0.203776	0.868275	0.0124123	0.0600263	-0.882657	0.542368	1.24645e-09	9.08532e-08
ENSG00000100522	GNPNAT1	5.35786	5.16283	5.51636	6.26715	6.19535	6.3609	5.30952	5.22928	5.27397	6.05491	6.12758	6.13048	0.929205	1.90423	1.63437e-09	5.50636e-07	8.78665	-0.0742508	0.949835	0.390635	0.620221	0.759041	1.69237	3.59924e-08	1.08978e-06
ENSG00000075945	KIFAP3	5.20159	5.17318	5.20784	4.44385	4.43847	4.35823	5.25944	5.37972	5.35052	4.55943	4.66131	4.6464	-0.780517	0.582158	1.74702e-09	5.75794e-07	8.7577	0.135786	1.09869	0.0487676	0.157883	-0.57196	0.672702	1.29587e-07	2.81068e-06
ENSG00000146733	PSPH	4.75059	4.81848	4.87954	5.73311	5.73235	5.69017	4.93846	4.88323	4.62388	5.72906	5.73311	5.66472	0.902533	1.86935	1.83959e-09	5.7896e-07	8.73528	-0.00107055	0.999258	0.989813	1	0.893064	1.85712	2.10716e-09	1.31655e-07
ENSG00000225485	ARHGAP23	4.46112	4.37001	4.49479	5.31236	5.25508	5.17753	4.78444	4.79332	4.94965	5.47893	5.41029	5.3275	0.806697	1.7492	1.8464e-09	5.7896e-07	8.73367	0.400822	1.32026	3.314e-05	0.000646635	0.964159	1.95093	9.88001e-11	1.45428e-08
ENSG00000134755	DSC2	6.01863	5.92528	6.02081	7.20004	7.19162	7.26597	6.24789	6.34189	6.29732	7.0279	7.0972	7.23892	1.23102	2.34733	1.92964e-09	5.7896e-07	8.71452	0.307579	1.23763	0.0135122	0.0637501	1.13284	2.19291	6.94884e-09	3.11691e-07
ENSG00000038274	MAT2B	7.16358	7.33392	7.22342	6.36391	6.47657	6.56428	7.10257	7.12382	7.11693	6.39388	6.39976	6.58772	-0.772281	0.585491	1.93133e-09	5.7896e-07	8.71414	-0.125939	0.916408	0.0723612	0.207818	-0.780347	0.582227	1.60118e-09	1.11134e-07
ENSG00000188910	GJB3	5.10168	5.22743	5.12895	6.05228	5.8648	5.94058	5.68452	5.65403	5.72704	6.44019	6.41091	6.33857	0.7998	1.74086	1.94756e-09	5.7896e-07	8.71051	0.535745	1.44969	7.40726e-07	3.19038e-05	1.24395	2.36846	1.28709e-12	7.01316e-10
ENSG00000145016	KIAA0226	5.76568	5.63369	5.63705	4.54043	4.53464	4.84346	5.73501	5.79033	5.97568	4.96482	4.88729	5.08775	-1.03974	0.486416	2.02569e-09	5.90605e-07	8.69343	0.154933	1.11337	0.0862813	0.234451	-0.699333	0.615857	4.3257e-07	7.55552e-06
ENSG00000070770	CSNK2A2	6.60528	6.57363	6.65496	7.17762	7.15587	7.15587	6.70369	6.74287	6.7933	7.14378	7.15754	7.1913	0.55194	1.46606	2.09469e-09	5.992e-07	8.67888	0.135463	1.09845	0.0138082	0.0647932	0.552935	1.46707	1.98456e-09	1.29689e-07
ENSG00000138758	2019-09-11	7.92486	7.77426	7.96829	6.70729	6.8039	6.76714	7.68984	7.69831	7.72172	6.65364	6.64456	6.73307	-1.12956	0.457054	2.20608e-09	6.19378e-07	8.65638	-0.185676	0.879237	0.0702934	0.204197	-1.21206	0.431652	7.65779e-10	6.5593e-08
ENSG00000122126	OCRL	4.96191	4.83075	5.08501	5.94025	5.91208	5.90317	5.02609	5.14204	5.29868	5.88877	5.97794	6.03231	0.959723	1.94494	2.75304e-09	7.44948e-07	8.56019	0.196954	1.14628	0.0411742	0.141062	1.00727	2.01011	1.23949e-09	9.07825e-08
ENSG00000172331	BPGM	4.32497	4.40824	4.41718	3.39097	3.22729	3.51939	4.50573	4.61255	4.52505	3.90537	3.74824	3.86987	-1.00442	0.49847	2.78818e-09	7.44948e-07	8.55468	0.164379	1.12068	0.0635137	0.190228	-0.542273	0.686688	8.39497e-06	8.25396e-05
ENSG00000172164	SNTB1	2.30498	2.41962	2.13679	3.46076	3.50297	3.37724	2.15786	2.10435	2.19996	3.0687	3.01432	3.06555	1.15955	2.23388	2.80074e-09	7.44948e-07	8.55273	-0.133483	0.911628	0.250111	0.476014	0.761918	1.69574	1.47627e-06	2.03101e-05
ENSG00000138623	SEMA7A	4.66173	4.62905	4.66798	5.43744	5.36155	5.36705	4.72854	4.80078	4.95905	5.58767	5.58633	5.63521	0.735881	1.66541	2.98044e-09	7.79076e-07	8.52572	0.176748	1.13033	0.0191999	0.0816749	0.950094	1.932	4.62263e-11	8.14926e-09
ENSG00000135823	STX6	5.54975	5.56693	5.60313	6.26958	6.2139	6.3334	6.23383	6.22779	6.3185	6.74145	6.72514	6.84187	0.699012	1.62339	3.27264e-09	8.3922e-07	8.4851	0.686869	1.60979	4.30145e-09	6.39356e-07	1.19606	2.29113	4.56776e-13	4.07364e-10
ENSG00000197903	HIST1H2BK	4.19263	4.19769	4.50321	5.83807	5.50592	5.58299	4.56833	4.69345	4.89322	5.9902	6.01986	6.17394	1.34529	2.54082	3.32123e-09	8.3922e-07	8.4787	0.421348	1.33918	0.00425658	0.0271152	1.76375	3.39579	3.71088e-11	6.96735e-09
ENSG00000146223	RPL7L1	7.58567	7.5014	7.69728	8.21983	8.26314	8.21652	7.76074	7.68827	7.7815	8.19124	8.19562	8.23581	0.638568	1.55678	3.45341e-09	8.58314e-07	8.46175	0.14891	1.10873	0.0217216	0.089368	0.612889	1.52932	6.34359e-09	2.9056e-07
ENSG00000174574	AKIRIN1	6.12952	6.2289	6.12105	6.74442	6.73803	6.85061	6.37892	6.35861	6.3514	6.91086	6.90331	7.03389	0.617654	1.53438	3.582e-09	8.75916e-07	8.44587	0.203027	1.15111	0.00247435	0.0181313	0.789162	1.72807	6.99619e-11	1.11652e-08
ENSG00000144583	2019-03-04	-0.305327	-0.162114	0.0296838	1.19605	1.15093	1.17002	-0.348587	-0.545427	-0.25836	0.9633	1.14268	0.669806	1.31837	2.49384	3.80935e-09	9.07648e-07	8.41915	-0.238081	0.847872	0.0720892	0.20739	1.07165	2.10184	8.50573e-08	2.08666e-06
ENSG00000115295	CLIP4	4.69737	4.56886	4.57035	5.39357	5.30144	5.4117	4.66108	4.79415	4.67665	5.28305	5.36394	5.42112	0.756609	1.68951	3.83348e-09	9.07648e-07	8.41641	0.098373	1.07057	0.189204	0.399167	0.743484	1.67421	4.86499e-09	2.36404e-07
ENSG00000171033	PKIA	3.12293	3.08488	3.20639	1.72655	1.85634	1.86439	2.61805	2.74735	2.44287	1.53572	1.44102	1.57342	-1.32216	0.399936	3.89137e-09	9.07648e-07	8.4099	-0.5352	0.690063	0.000238488	0.00305898	-1.6212	0.325065	1.94172e-10	2.23018e-08
ENSG00000167754	KLK5	0.248108	0.245824	-0.0565221	1.89305	2.05835	1.77117	0.3032	0.377301	0.324058	2.4369	1.82021	1.65849	1.76171	3.39101	3.95405e-09	9.08294e-07	8.40296	0.188889	1.13989	0.27607	0.504642	1.82734	3.54881	2.11016e-09	1.31655e-07
ENSG00000150093	ITGB1	9.16111	9.09598	9.27751	9.90122	9.98204	10.0186	9.23856	9.37054	9.3514	9.79707	9.83883	9.90122	0.789195	1.72811	4.14618e-09	9.38213e-07	8.38235	0.142137	1.10354	0.0713643	0.206008	0.667528	1.58835	5.04637e-08	1.39381e-06
ENSG00000132970	WASF3	2.29083	2.37778	2.51356	3.43805	3.73929	3.49978	1.99596	1.84398	2.22831	3.05393	3.01432	3.30032	1.16529	2.24278	4.98301e-09	1.11099e-06	8.30251	-0.370901	0.773299	0.00614061	0.0357518	0.728233	1.65661	4.71236e-06	5.14357e-05
ENSG00000188070	C11orf95	4.8083	4.84999	4.85009	3.98745	4.10292	4.07353	4.98072	5.05658	5.02134	4.19843	4.26351	4.2071	-0.781556	0.581739	5.13124e-09	1.12746e-06	8.28978	0.183456	1.1356	0.0156023	0.0706494	-0.613066	0.653806	1.39536e-07	2.95875e-06
ENSG00000116922	C1orf109	4.66617	4.50261	4.70792	5.35481	5.4416	5.33478	4.66585	4.45998	4.66778	5.21202	5.23282	5.26738	0.751877	1.68398	5.21135e-09	1.1287e-06	8.28305	-0.0273405	0.981227	0.714612	0.866531	0.612041	1.52842	1.1244e-07	2.52174e-06
ENSG00000119285	HEATR1	6.80855	6.76241	7.06733	7.8807	7.89921	7.9881	6.84874	6.82086	7.02756	7.60745	7.66059	7.8192	1.04355	2.0613	5.50899e-09	1.17636e-06	8.25893	0.0200806	1.01402	0.845374	0.942475	0.816373	1.76097	2.08989e-07	4.14181e-06
ENSG00000145041	VPRBP	6.14513	6.00429	6.22702	6.84451	6.95052	6.84057	6.18184	6.09964	6.27726	6.69991	6.74875	6.73608	0.753337	1.68569	5.64112e-09	1.18785e-06	8.24863	0.0610749	1.04324	0.413585	0.642587	0.602977	1.51885	1.52355e-07	3.19924e-06
ENSG00000037474	NSUN2	7.62577	7.52447	7.62292	6.82926	6.94323	6.83517	7.51427	7.44174	7.40841	6.89092	6.86853	6.78209	-0.721735	0.606368	6.40998e-09	1.33126e-06	8.19314	-0.136208	0.909908	0.0574316	0.177372	-0.74359	0.597251	4.02316e-09	2.07594e-07
ENSG00000173894	CBX2	6.27364	6.17029	6.11969	5.49191	5.45846	5.48614	5.59954	5.63977	5.56959	4.94732	4.97367	4.8559	-0.709141	0.611684	6.52402e-09	1.33663e-06	8.18548	-0.58503	0.666635	9.83014e-08	6.99694e-06	-1.26205	0.416952	1.20472e-12	7.01316e-10
ENSG00000003056	M6PR	6.74211	6.74875	6.71726	7.32544	7.37203	7.36319	6.80054	6.72514	6.88111	7.36634	7.36988	7.36441	0.617459	1.53417	6.7836e-09	1.37128e-06	8.16854	0.066228	1.04698	0.284913	0.513135	0.630803	1.54843	4.77259e-09	2.34166e-07
ENSG00000140948	ZCCHC14	6.2916	6.17472	6.31088	6.95869	6.89574	6.87733	6.31012	6.40312	6.36923	6.79488	6.91295	6.89331	0.651721	1.57104	6.91282e-09	1.37902e-06	8.16035	0.101926	1.07321	0.126864	0.304345	0.607994	1.52414	1.93044e-08	6.69736e-07
ENSG00000089737	DDX24	8.12891	8.07344	7.98484	7.43101	7.47848	7.32917	7.9077	7.81243	7.99632	7.53736	7.4664	7.35052	-0.649525	0.63749	7.1866e-09	1.41501e-06	8.14348	-0.156975	0.896904	0.0196815	0.0831175	-0.61079	0.654838	1.70926e-08	6.19953e-07
ENSG00000171004	HS6ST2	5.76463	5.67029	5.90798	6.42881	6.37378	6.46527	5.67253	5.63055	5.78817	6.21033	6.26877	6.24165	0.641919	1.5604	7.38229e-09	1.43491e-06	8.13181	-0.0835085	0.94376	0.205295	0.420483	0.459563	1.37513	9.14304e-07	1.37791e-05
ENSG00000170500	LONRF2	1.48994	1.1879	1.38263	2.68589	2.61137	2.68481	1.25407	1.46026	1.19995	1.92273	2.0231	2.44434	1.30727	2.47472	7.48494e-09	1.43645e-06	8.12581	-0.0486606	0.966833	0.71794	0.868349	0.77537	1.71163	1.28197e-05	0.000117438
ENSG00000140497	SCAMP2	5.62443	5.54813	5.50101	6.33078	6.26895	6.16377	5.78998	5.80982	5.81887	6.37993	6.36952	6.37593	0.696681	1.62077	7.81016e-09	1.46534e-06	8.10734	0.248279	1.18779	0.0020054	0.0155184	0.817174	1.76195	6.19737e-10	5.52696e-08
ENSG00000189337	KAZN	3.36931	3.29524	3.58924	4.43782	4.52	4.43249	3.52846	3.32164	3.78793	4.49861	4.34725	4.4825	1.04611	2.06496	7.8288e-09	1.46534e-06	8.1063	0.12886	1.09343	0.24257	0.468017	1.02534	2.03544	1.03089e-08	4.2471e-07
ENSG00000005884	ITGA3	7.84893	7.73197	7.57444	8.63703	8.53576	8.36031	8.42126	8.36031	8.28	8.91445	8.89306	8.96216	0.792546	1.73213	8.10313e-09	1.49819e-06	8.09135	0.63518	1.55313	2.11293e-07	1.23684e-05	1.20452	2.3046	9.75764e-12	2.61916e-09
ENSG00000188811	NHLRC3	1.89892	1.98434	1.95099	2.96419	2.87672	2.87446	1.35615	1.61828	1.5006	2.58235	2.65347	2.80582	0.960442	1.94591	8.31613e-09	1.51905e-06	8.08008	-0.453057	0.730493	0.000265889	0.00332328	0.735164	1.66459	4.38563e-07	7.64259e-06
ENSG00000243509	TNFRSF6B	1.82312	1.67931	1.63943	3.55419	3.73798	3.09128	1.95879	1.73366	1.60476	3.55419	4.05239	3.50247	1.74783	3.35854	8.67779e-09	1.56624e-06	8.06159	0.0515804	1.0364	0.783493	0.906551	1.98964	3.97138	9.6176e-10	7.5944e-08
ENSG00000184743	ATL3	6.92318	6.89306	6.91295	7.53197	7.50677	7.5463	6.85494	7.08366	6.93992	7.36319	7.4759	7.49351	0.618618	1.5354	9.03141e-09	1.60366e-06	8.04424	0.0498173	1.03513	0.427149	0.655467	0.534322	1.44826	7.7795e-08	1.93988e-06
ENSG00000156103	MMP16	0.747184	0.420215	0.845511	2.09128	2.13679	1.89305	0.894035	0.431911	0.401712	1.49475	1.47454	1.61709	1.36982	2.58439	9.09667e-09	1.60366e-06	8.04112	-0.0949629	0.936296	0.501393	0.715985	0.857861	1.81235	7.01439e-06	7.14126e-05
ENSG00000116985	BMP8B	3.71484	3.79463	3.78283	4.7012	4.63257	4.55818	3.70436	3.65193	3.81687	4.37395	4.32469	4.46164	0.866723	1.82352	9.86252e-09	1.70344e-06	8.00601	-0.039614	0.972915	0.664034	0.833761	0.622332	1.53936	1.23145e-06	1.768e-05
ENSG00000197763	TXNRD3	3.17261	3.00036	3.07652	3.84777	3.95687	3.92074	2.86389	2.93678	2.98217	3.60367	3.657	3.45611	0.825305	1.77191	9.88741e-09	1.70344e-06	8.00492	-0.155406	0.89788	0.0875239	0.236462	0.489712	1.40416	1.4572e-05	0.000129652
ENSG00000151208	DLG5	6.53448	6.44778	6.40738	7.47781	7.3786	7.34908	6.583	6.56542	6.61696	7.3432	7.32286	7.32138	0.938609	1.91668	1.02567e-08	1.74236e-06	7.98899	0.125182	1.09065	0.203596	0.418993	0.86588	1.82245	3.39366e-08	1.04364e-06
ENSG00000169826	CSGALNACT2	2.88355	3.0076	3.03103	4.04336	3.98789	4.06915	3.12983	3.22801	3.20187	4.10056	4.16208	4.43731	1.05945	2.08414	1.04424e-08	1.74236e-06	7.9812	0.212653	1.15882	0.0684757	0.200378	1.25828	2.39211	6.16454e-10	5.52696e-08
ENSG00000154640	BTG3	6.66408	6.79878	6.78772	5.97162	5.96452	6.16807	6.69634	6.63915	6.63077	5.96593	6.04679	6.12636	-0.715604	0.60895	1.0458e-08	1.74236e-06	7.98055	-0.0947697	0.936422	0.182189	0.389837	-0.704111	0.613821	1.27452e-08	4.94776e-07
ENSG00000066654	THUMPD1	5.39882	5.384	5.68392	6.17549	6.29327	6.25049	5.69726	5.68452	5.78914	6.28315	6.32055	6.37321	0.751282	1.68329	1.07131e-08	1.76545e-06	7.97009	0.235258	1.17712	0.0061706	0.0358302	0.837033	1.78637	1.93723e-09	1.27697e-07
ENSG00000105854	PON2	5.79685	5.89538	5.72892	4.93292	5.04669	4.93475	5.73142	5.79162	5.64191	5.06096	5.13738	5.06673	-0.835766	0.560285	1.08364e-08	1.76657e-06	7.96511	-0.0856573	0.942355	0.2912	0.520869	-0.718857	0.607578	8.31315e-08	2.04272e-06
ENSG00000119912	IDE	6.55731	6.50976	6.6228	7.22267	7.25518	7.18905	6.70885	6.76358	6.78334	7.18428	7.20527	7.18554	0.659176	1.57918	1.13371e-08	1.82852e-06	7.9455	0.188797	1.13981	0.0108763	0.0541173	0.628548	1.54601	2.26504e-08	7.66525e-07
ENSG00000244675	AC108676.1	3.41867	3.49232	3.44428	2.26119	2.61468	2.62209	3.18953	3.33697	3.25232	2.33687	2.26413	2.40835	-0.95282	0.516622	1.18318e-08	1.8736e-06	7.92695	-0.192185	0.875279	0.0461645	0.151822	-1.11563	0.461488	1.22329e-09	9.07825e-08
ENSG00000253719	ATXN7L3B	7.31939	7.32709	7.29503	6.66247	6.75485	6.71985	7.3614	7.51427	7.47345	6.79239	6.83517	6.93673	-0.601508	0.659065	1.19823e-08	1.8736e-06	7.92146	0.135872	1.09876	0.0308606	0.114817	-0.459374	0.727302	4.93157e-07	8.35392e-06
ENSG00000183780	SLC35F3	3.14029	3.1195	3.03674	3.91648	4.03857	3.85266	2.73584	2.92521	2.92797	3.82529	3.81953	3.71667	0.837022	1.78636	1.20095e-08	1.8736e-06	7.92048	-0.235902	0.849154	0.0163757	0.0731717	0.688509	1.61162	2.17387e-07	4.28832e-06
ENSG00000103707	MTFMT	3.42848	3.66568	3.59833	4.37068	4.41812	4.47724	3.76673	3.57393	3.70489	4.54346	4.67455	4.41732	0.857697	1.81214	1.21109e-08	1.8736e-06	7.91682	0.117641	1.08496	0.203407	0.418718	0.981458	1.97446	1.36412e-09	9.80159e-08
ENSG00000186815	TPCN1	4.46608	4.40085	4.44969	5.38156	5.20678	5.23363	4.30142	4.27557	4.32233	5.2058	5.16341	5.13197	0.835301	1.78423	1.22694e-08	1.87895e-06	7.91118	-0.139013	0.90814	0.131298	0.311616	0.728429	1.65683	9.33596e-08	2.2116e-06
ENSG00000067955	CBFB	6.91191	6.93226	6.92318	6.16807	6.29236	6.15456	6.72268	6.72122	6.62441	6.19176	6.19258	5.98483	-0.717411	0.608188	1.2982e-08	1.96821e-06	7.88666	-0.233059	0.850829	0.00383761	0.0251325	-0.798941	0.574771	2.64467e-09	1.5481e-07
ENSG00000196937	FAM3C	9.06409	9.02359	9.1211	8.46538	8.533	8.59915	9.0712	9.14392	9.084	8.50796	8.57127	8.6531	-0.537074	0.689167	1.53607e-08	2.30578e-06	7.81359	0.0301933	1.02115	0.577149	0.773187	-0.49226	0.710911	5.24766e-08	1.4258e-06
ENSG00000116133	DHCR24	9.30393	9.22801	9.14392	9.86824	9.79707	9.83268	8.98954	9.05575	9.00979	9.52327	9.59479	9.51212	0.607296	1.5234	1.55823e-08	2.31612e-06	7.80737	-0.207014	0.866329	0.00407447	0.0263088	0.318059	1.24665	7.46081e-05	0.000491797
ENSG00000158373	HIST1H2BD	2.77975	2.71874	2.89798	4.26098	4.02356	4.10779	3.39795	3.45733	4.01078	4.88649	4.97272	5.15111	1.33239	2.5182	1.62199e-08	2.38747e-06	7.78995	0.823949	1.77024	1.53174e-05	0.000354545	2.20421	4.60822	3.06107e-12	1.22128e-09
ENSG00000184014	DENND5A	6.55154	6.46527	6.48051	5.60788	5.59456	5.75975	6.496	6.62226	6.71507	5.74471	5.58154	5.79272	-0.845204	0.556632	1.66262e-08	2.42375e-06	7.77921	0.112087	1.08079	0.187948	0.397506	-0.793009	0.577139	3.91475e-08	1.16374e-06
ENSG00000100139	MICALL1	4.63275	4.59737	4.55432	5.34049	5.1763	5.24784	5.46857	5.45534	5.5756	6.02155	6.13612	6.12056	0.660014	1.5801	1.7665e-08	2.53394e-06	7.75289	0.904979	1.87252	1.17916e-10	3.50534e-08	1.49768	2.82388	2.1113e-14	4.00117e-11
ENSG00000138381	ASNSD1	6.3418	6.3885	6.3128	5.77812	5.72583	5.77658	6.29923	6.29597	6.1922	5.75443	5.75532	5.81319	-0.587622	0.665439	1.77163e-08	2.53394e-06	7.75163	-0.0853684	0.942544	0.161059	0.358511	-0.573607	0.671934	2.413e-08	8.02269e-07
ENSG00000198018	ENTPD7	5.70198	5.36669	5.5549	3.94381	4.01849	3.89395	5.41581	5.82103	5.77036	3.96767	3.87518	4.14813	-1.58884	0.332437	1.82607e-08	2.58739e-06	7.73848	0.128191	1.09292	0.385731	0.615203	-1.54474	0.342758	2.46678e-08	8.14141e-07
ENSG00000002834	LASP1	8.13185	8.06061	7.95129	8.73378	8.6531	8.56744	7.99709	7.94227	8.08399	8.57978	8.54337	8.40806	0.603486	1.51938	1.91682e-08	2.69082e-06	7.71742	-0.0402205	0.972506	0.530273	0.737701	0.4626	1.37802	8.34087e-07	1.28586e-05
ENSG00000177469	PTRF	6.8707	6.90803	6.8267	7.89791	7.79353	7.7296	6.79209	6.8471	7.00814	7.91418	7.8927	7.51349	0.938538	1.91659	2.02149e-08	2.78829e-06	7.69433	0.013965	1.00973	0.889774	0.967292	0.905512	1.87321	3.38812e-08	1.04364e-06
ENSG00000235823	LINC00263	3.48663	3.46076	3.35895	4.11092	4.28564	4.28868	3.55689	3.46353	3.52776	4.21528	4.10247	4.10615	0.79256	1.73214	2.02304e-08	2.78829e-06	7.694	0.0803783	1.0573	0.357456	0.588099	0.705891	1.63115	1.11033e-07	2.49757e-06
ENSG00000035115	SH3YL1	3.58556	3.511	3.71773	4.47741	4.36955	4.61082	3.41999	3.47641	3.50992	4.49759	4.50588	4.56289	0.881336	1.84208	2.10096e-08	2.86961e-06	7.67758	-0.13554	0.910329	0.178743	0.384979	0.91754	1.88889	1.07873e-08	4.3868e-07
ENSG00000108439	PNPO	5.63292	5.65608	5.60052	6.17676	6.26647	6.21495	6.01144	5.85365	5.90948	6.38514	6.31088	6.22129	0.589469	1.50469	2.24368e-08	3.03719e-06	7.64904	0.294903	1.2268	0.000167014	0.00233159	0.676172	1.59789	2.66148e-09	1.55195e-07
ENSG00000090621	PABPC4	7.72572	7.74311	7.58799	8.52611	8.51505	8.33926	7.79651	7.78475	7.7362	8.70442	8.7431	8.48849	0.77449	1.71059	2.43255e-08	3.24125e-06	7.61394	0.0867086	1.06194	0.305187	0.536831	0.9599	1.94518	8.73399e-10	7.11914e-08
ENSG00000101337	TM9SF4	6.66962	6.59992	6.58058	7.1715	7.17555	7.14964	6.76069	6.73041	6.91498	7.32843	7.23768	7.19317	0.548825	1.46289	2.43719e-08	3.24125e-06	7.61311	0.185343	1.13709	0.0050998	0.0308664	0.636534	1.55459	2.48425e-09	1.48868e-07
ENSG00000178913	TAF7	6.67891	6.78772	6.80054	5.79948	5.84181	6.10937	6.7704	6.83446	6.84874	5.95896	5.95552	6.16074	-0.839068	0.559005	2.65312e-08	3.47629e-06	7.57624	0.0622236	1.04407	0.469226	0.691815	-0.731047	0.602467	1.70853e-07	3.50686e-06
ENSG00000108219	TSPAN14	7.91418	7.85033	7.77804	8.35038	8.3135	8.32743	7.96282	7.86253	7.98346	8.33748	8.26847	8.34581	0.482843	1.39749	2.65978e-08	3.47629e-06	7.57515	0.0886772	1.06339	0.100036	0.259567	0.46961	1.38474	3.92434e-08	1.16374e-06
ENSG00000240065	PSMB9	1.46594	1.47578	1.2268	-0.0985542	-0.163084	0.0564499	1.1832	1.35533	1.06781	-0.0210311	0.115658	-0.205757	-1.45814	0.363961	2.81318e-08	3.64535e-06	7.5508	-0.187611	0.878059	0.224505	0.445689	-1.42655	0.372019	3.78991e-08	1.13555e-06
ENSG00000136999	NOV	2.51489	2.47421	2.60145	3.48663	3.60308	3.60071	2.22698	2.13559	2.64808	3.17275	3.17961	3.13095	1.03339	2.04683	2.84265e-08	3.65232e-06	7.54628	-0.192824	0.874892	0.116426	0.286735	0.631279	1.54894	2.49589e-05	0.000200957
ENSG00000153064	BANK1	2.03152	2.23796	2.18326	3.24028	3.32707	3.34532	1.89152	1.83395	1.5517	2.84314	2.90183	2.65383	1.15319	2.22405	2.96893e-08	3.75393e-06	7.5274	-0.392007	0.762069	0.00847903	0.0452325	0.649319	1.56843	6.8085e-05	0.000458772
ENSG00000103044	HAS3	8.72616	8.6153	8.59915	9.31084	9.191	9.22451	8.5282	8.4517	8.4944	8.92352	8.9794	8.88048	0.595236	1.51072	2.97125e-08	3.75393e-06	7.52706	-0.155485	0.897831	0.0262539	0.102296	0.280971	1.21501	0.000339762	0.00171419
ENSG00000147471	PROSC	5.92784	5.98163	6.01616	6.51126	6.50109	6.50753	6.01458	5.9973	6.04741	6.51473	6.55602	6.40859	0.531483	1.44541	3.01888e-08	3.76412e-06	7.52015	0.0446332	1.03142	0.445414	0.671123	0.518219	1.43219	4.26528e-08	1.22473e-06
ENSG00000155066	PROM2	3.74783	3.71579	3.72719	4.77285	4.69372	4.83224	4.42213	4.19221	4.54693	5.06346	5.06998	5.20276	1.03591	2.0504	3.02897e-08	3.76412e-06	7.5187	0.656943	1.57674	1.7178e-05	0.000381182	1.38141	2.60523	2.86206e-10	3.03438e-08
ENSG00000157693	C9orf91	4.21624	4.2483	4.14176	3.556	3.58401	3.51431	4.1876	4.10077	4.11796	3.59033	3.68802	3.57721	-0.650796	0.636929	3.21128e-08	3.95823e-06	7.49332	-0.0669003	0.954687	0.324801	0.556915	-0.583646	0.667275	1.35061e-07	2.90448e-06
ENSG00000111269	CREBL2	4.20053	4.14813	4.27442	4.81496	4.83058	4.81771	4.6464	4.7068	4.67374	5.17827	5.08615	5.17069	0.613629	1.5301	3.26807e-08	3.99574e-06	7.48571	0.468203	1.38339	1.5565e-06	5.75543e-05	0.937527	1.91524	3.61767e-11	6.94273e-09
ENSG00000128591	FLNC	7.00814	6.96405	7.03099	7.84737	7.66883	7.58676	7.09783	7.21496	7.37731	7.86253	7.9862	7.82665	0.700139	1.62466	3.56494e-08	4.32385e-06	7.44795	0.229145	1.17214	0.00757109	0.0418314	0.890912	1.85435	8.61551e-10	7.06053e-08
ENSG00000172086	KRCC1	2.73336	2.80218	2.96734	3.76596	3.75686	3.9845	2.19944	2.48645	2.23373	3.54211	3.53766	3.35142	1.00153	2.00212	3.70139e-08	4.45371e-06	7.43164	-0.527407	0.6938	0.000318155	0.00384455	0.643757	1.56239	1.65614e-05	0.00014389
ENSG00000132467	UTP3	6.65096	6.69726	6.62144	6.10428	6.10388	6.06206	6.92949	6.93287	6.92708	6.46613	6.46736	6.38213	-0.566529	0.67524	3.73831e-08	4.46272e-06	7.42732	0.273172	1.20846	0.000209624	0.00277091	-0.217918	0.859806	0.0018913	0.00704868
ENSG00000013288	MAN2B2	4.89627	4.84625	4.8029	5.5446	5.47234	5.46402	5.07068	4.96717	5.14559	5.71006	5.69448	5.60495	0.645138	1.56389	3.9005e-08	4.61996e-06	7.40888	0.212625	1.15879	0.0078904	0.0428922	0.821485	1.76722	8.9845e-10	7.28417e-08
ENSG00000107021	TBC1D13	4.78124	4.70819	4.56121	4.03104	3.98484	4.07133	4.78541	4.80722	4.85387	4.00312	3.99222	4.06842	-0.654876	0.63513	3.97987e-08	4.67743e-06	7.40013	0.13167	1.09556	0.0642069	0.191697	-0.662855	0.631627	3.19525e-08	1.00297e-06
ENSG00000113763	UNC5A	2.06898	1.58115	1.7845	3.26185	2.99653	2.89852	1.11495	1.02684	1.4476	2.69389	2.69125	2.38664	1.24125	2.36403	4.49756e-08	5.22847e-06	7.34702	-0.614888	0.65298	0.000572267	0.0059142	0.780067	1.71721	2.64481e-05	0.00021082
ENSG00000100380	ST13	8.19822	8.19384	8.43528	8.86539	8.8899	8.97209	8.35368	8.38652	8.60377	8.93543	8.94707	8.97474	0.633519	1.55134	4.51771e-08	5.22847e-06	7.34508	0.172517	1.12702	0.02366	0.0953762	0.676813	1.5986	1.66197e-08	6.08628e-07
ENSG00000075303	SLC25A40	5.06586	5.03949	5.10189	4.39471	4.42237	4.45727	4.57818	4.63696	4.45031	3.98821	3.97103	3.88758	-0.644264	0.639819	4.74617e-08	5.45127e-06	7.32366	-0.51392	0.700317	9.60919e-07	3.89532e-05	-1.11971	0.460188	1.60894e-11	3.75278e-09
ENSG00000130707	ASS1	5.28432	5.32416	5.11334	6.31823	6.05368	6.25648	5.69726	5.52338	5.74556	6.57451	6.45032	6.81093	0.968501	1.95681	4.89189e-08	5.57639e-06	7.31052	0.414479	1.33282	0.0012937	0.0109147	1.37039	2.5854	1.98158e-10	2.25885e-08
ENSG00000124882	EREG	9.47912	9.2887	9.56278	10.2062	10.2132	10.2381	9.74874	9.85333	9.7635	10.0376	10.1015	10.265	0.7758	1.71214	5.08569e-08	5.75404e-06	7.29365	0.345186	1.27031	0.000854436	0.00797176	0.691085	1.6145	2.63527e-07	5.03826e-06
ENSG00000074410	CA12	2.53206	2.65708	2.69852	3.5641	3.57367	3.71515	2.18417	2.07556	2.54685	3.41472	3.32573	3.14029	0.988345	1.98391	5.31317e-08	5.96689e-06	7.27465	-0.360004	0.779163	0.00693419	0.0389801	0.665323	1.58592	1.25536e-05	0.000115349
ENSG00000104368	PLAT	3.97359	3.96802	3.71035	4.76322	4.7071	4.69317	3.84459	3.86104	3.80217	4.51029	4.49018	4.3601	0.836706	1.78597	5.54329e-08	6.17955e-06	7.25623	-0.0486292	0.966855	0.623305	0.805758	0.56947	1.48398	1.09129e-05	0.000102636
ENSG00000116285	ERRFI1	8.3135	8.28	8.49089	8.86346	8.86817	8.9541	8.28218	8.32391	8.38527	8.46859	8.50404	8.59609	0.533918	1.44786	5.69261e-08	6.29458e-06	7.24469	-0.0307913	0.978883	0.612594	0.798516	0.161462	1.11842	0.0143456	0.0372996
ENSG00000176390	CRLF3	6.14433	6.11864	6.27194	5.48812	5.5688	5.65646	6.11217	6.10332	6.138	5.56556	5.70591	5.74933	-0.607123	0.656505	5.72952e-08	6.29458e-06	7.24188	-0.0602614	0.95909	0.367416	0.597621	-0.504841	0.704738	6.70599e-07	1.08104e-05
ENSG00000168792	ABHD15	3.57146	3.5672	3.51467	4.32497	4.35206	4.28496	3.53686	3.40072	3.68016	4.12287	4.19203	4.18563	0.769506	1.70469	6.01397e-08	6.55956e-06	7.22084	-0.0118612	0.991812	0.895984	0.96994	0.615476	1.53206	1.41721e-06	1.98938e-05
ENSG00000110911	SLC11A2	5.77206	5.7541	5.77229	5.14387	5.19958	5.1606	5.43438	5.37712	5.48676	4.77537	4.7093	4.97272	-0.598113	0.660617	6.08895e-08	6.59389e-06	7.21546	-0.333338	0.793698	8.30343e-05	0.00133639	-0.94768	0.518466	7.5682e-11	1.1829e-08
ENSG00000196943	NOP9	5.79801	5.73981	5.8322	6.40944	6.35034	6.39191	5.65608	5.53807	5.80884	6.31672	6.23941	6.1656	0.594009	1.50943	6.42439e-08	6.90782e-06	7.19217	-0.12214	0.918823	0.0902173	0.24136	0.45097	1.36696	2.85914e-06	3.45673e-05
ENSG00000136240	KDELR2	7.10922	7.13846	7.07843	7.67627	7.68827	7.71085	7.17933	7.19624	7.10434	7.71536	7.7206	7.64901	0.583014	1.49798	6.81173e-08	7.22967e-06	7.16674	0.0511753	1.03611	0.449546	0.674876	0.586337	1.50143	6.13571e-08	1.60109e-06
ENSG00000136986	DERL1	6.83977	6.80532	6.82406	6.27855	6.38915	6.27588	6.9469	6.98042	6.85724	6.51126	6.59291	6.4368	-0.508477	0.702964	6.81909e-08	7.22967e-06	7.16627	0.105111	1.07558	0.0735915	0.210355	-0.309171	0.807105	3.63368e-05	0.000273129
ENSG00000182934	SRPR	6.56516	6.53818	6.36734	7.04718	7.00893	6.97011	6.71223	6.66072	6.61504	7.1338	7.14314	7.07305	0.518335	1.4323	7.08786e-08	7.42356e-06	7.14948	0.172164	1.12675	0.00924286	0.0482047	0.626321	1.54362	4.02563e-09	2.07594e-07
ENSG00000134287	ARF3	7.6456	7.52634	7.53617	7.06333	7.13793	6.99304	7.54218	7.57544	7.61662	7.13723	7.13058	6.97354	-0.504556	0.704877	7.09991e-08	7.42356e-06	7.14875	0.00871005	1.00606	0.87674	0.959844	-0.488632	0.7127	1.07973e-07	2.45425e-06
ENSG00000197063	MAFG	6.49424	6.35624	6.52834	5.84922	5.87824	5.83459	6.73153	6.8091	6.87247	6.20073	6.25565	6.34588	-0.605383	0.657297	7.15063e-08	7.42539e-06	7.14566	0.345005	1.27015	5.4916e-05	0.000942901	-0.192282	0.87522	0.0098296	0.0272743
ENSG00000174238	PITPNA	5.46051	5.40946	5.1705	6.10123	6.10888	6.06825	5.37141	5.32841	5.19654	6.05046	6.02567	5.78087	0.745565	1.67663	7.26394e-08	7.49174e-06	7.13883	-0.0485684	0.966895	0.582167	0.777225	0.605662	1.52168	1.32811e-06	1.88357e-05
ENSG00000182400	TRAPPC6B	4.14885	3.92695	4.27442	5.06655	5.23574	5.16762	4.35981	4.4576	4.73389	5.15234	5.28059	5.5144	1.04045	2.05687	7.33046e-08	7.49732e-06	7.13487	0.401238	1.32064	0.00400049	0.0259416	1.19879	2.29547	8.00693e-09	3.48831e-07
ENSG00000044090	CUL7	5.01284	4.98169	4.80104	5.79456	5.64077	5.61389	5.29653	5.22364	5.42489	5.93507	5.81733	5.99133	0.75099	1.68295	7.36825e-08	7.49732e-06	7.13264	0.382887	1.30395	0.000328428	0.00392811	0.982163	1.97542	1.14685e-09	8.63106e-08
ENSG00000119888	EPCAM	8.09051	8.17163	8.22452	8.55464	8.57127	8.68585	8.06697	8.04149	8.066	8.52611	8.49886	8.5282	0.441694	1.3582	7.4396e-08	7.51946e-06	7.12845	-0.103994	0.930453	0.0542224	0.170447	0.355559	1.27948	1.47536e-06	2.03101e-05
ENSG00000135862	LAMC1	8.03246	7.88488	7.89921	8.51505	8.54677	8.44302	8.28775	8.35614	8.46859	8.58356	8.60787	8.68585	0.562789	1.47712	7.68371e-08	7.71475e-06	7.11443	0.432011	1.34911	2.90897e-06	9.66124e-05	0.686751	1.60965	3.83179e-09	2.00469e-07
ENSG00000139372	TDG	6.25881	6.33643	6.23421	5.26565	5.35428	5.34705	6.24255	6.26647	6.0231	5.29604	5.35481	5.44622	-0.954334	0.51608	8.07113e-08	8.01101e-06	7.09307	-0.099329	0.933467	0.348485	0.579826	-0.911253	0.531723	1.43823e-07	3.04115e-06
ENSG00000159692	CTBP1	5.62028	5.67398	5.78295	6.64364	6.61455	6.31599	5.79054	5.68793	5.75508	6.48476	6.62792	6.3885	0.832787	1.78112	8.08446e-08	8.01101e-06	7.09235	0.0522839	1.03691	0.597155	0.788286	0.808462	1.75134	1.21388e-07	2.68515e-06
ENSG00000142178	SIK1	4.57431	4.41732	4.43866	3.47065	3.50645	3.04161	4.47659	4.58705	4.492	3.51939	3.45358	3.43189	-1.13663	0.454821	8.22192e-08	8.02085e-06	7.08503	0.0417516	1.02936	0.727162	0.872459	-1.00828	0.497139	3.62293e-07	6.5304e-06
ENSG00000130935	NOL11	8.38312	8.4185	8.48474	7.9274	8.01367	7.99555	8.17163	8.1234	8.10634	7.8385	7.86751	7.75118	-0.449872	0.732108	8.23386e-08	8.02085e-06	7.0844	-0.294948	0.815102	1.91084e-05	0.00041624	-0.609505	0.655422	9.51364e-10	7.55164e-08
ENSG00000224531	C6orf228	6.16121	5.98708	6.2199	5.22191	5.25289	5.31714	5.77641	5.95468	5.90206	5.10774	5.21641	5.34322	-0.858584	0.551494	8.2531e-08	8.02085e-06	7.08338	-0.2447	0.843992	0.0183032	0.0789458	-0.900572	0.535674	4.1349e-08	1.19865e-06
ENSG00000108861	DUSP3	5.91085	5.90873	5.86797	6.38027	6.3091	6.39662	6.10664	6.1498	6.20946	6.54518	6.53266	6.5956	0.466054	1.38133	8.38848e-08	8.10049e-06	7.07632	0.259434	1.19701	0.00013708	0.00199068	0.66179	1.58204	3.79138e-10	3.80669e-08
ENSG00000071967	CYBRD1	5.34301	5.31646	5.42368	6.06667	6.07478	6.1513	5.06904	5.20311	5.1869	5.81846	5.82986	5.95835	0.736635	1.66628	8.5916e-08	8.24413e-06	7.06593	-0.207794	0.86586	0.029198	0.110282	0.507708	1.42179	1.27125e-05	0.000116596
ENSG00000126003	PLAGL2	5.71164	5.57004	5.51822	6.36057	6.33579	6.27111	5.61741	5.67346	5.6993	6.26275	6.27709	6.26055	0.722467	1.65	8.71475e-08	8.30971e-06	7.05974	0.0633303	1.04487	0.462584	0.685958	0.666712	1.58745	2.69726e-07	5.13733e-06
ENSG00000203711	C6orf99	1.11902	1.38859	1.1138	2.24602	2.26588	2.11298	1.12805	0.959656	0.957833	2.29052	2.27905	2.0076	1.00116	2.00161	9.22469e-08	8.67585e-06	7.03505	-0.192142	0.875305	0.123069	0.297868	0.985872	1.98051	1.12025e-07	2.51617e-06
ENSG00000113396	SLC27A6	3.76821	3.71908	3.93801	3.01937	3.17875	3.12788	3.74893	3.81383	3.63696	2.84056	2.9175	2.96419	-0.699421	0.61582	9.23821e-08	8.67585e-06	7.03441	-0.0748468	0.949443	0.339383	0.571329	-0.900907	0.53555	2.60791e-09	1.54447e-07
ENSG00000116017	ARID3A	4.27405	4.26072	4.251	3.57013	3.45027	3.56215	4.82757	5.03481	4.98942	4.22691	4.33322	4.40845	-0.734466	0.60104	9.27042e-08	8.67585e-06	7.0329	0.688739	1.61187	5.93566e-08	4.63868e-06	0.0604004	1.04276	0.453421	0.589623
ENSG00000133216	EPHB2	4.51323	4.398	4.2225	5.25626	5.08204	5.14085	4.31332	4.17515	4.35785	5.0502	5.09315	5.08325	0.781464	1.71887	9.39918e-08	8.74239e-06	7.02691	-0.0961793	0.935507	0.320204	0.552288	0.697138	1.62129	4.71543e-07	8.07804e-06
ENSG00000132561	MATN2	2.37154	2.12834	2.11074	3.17409	2.93192	3.0967	2.09769	1.84398	2.04532	3.0491	2.98641	3.06779	0.863925	1.81998	9.62227e-08	8.89532e-06	7.01672	-0.208005	0.865734	0.0631846	0.189504	0.830657	1.7785	1.65214e-07	3.4172e-06
ENSG00000125844	RRBP1	7.19383	7.15861	7.08819	7.83378	7.73092	7.71536	7.40317	7.32138	7.54534	8.00814	7.99709	8.00692	0.613108	1.52955	9.84081e-08	8.98995e-06	7.00697	0.276383	1.21115	0.00113263	0.00985443	0.857077	1.81136	5.86969e-10	5.32877e-08
ENSG00000170345	FOS	2.7675	2.83753	2.60633	1.67931	1.49407	1.3448	2.79784	3.35045	3.08203	1.68224	1.9533	1.69112	-1.23131	0.425931	9.84323e-08	8.98995e-06	7.00686	0.339393	1.26522	0.0177465	0.077316	-0.961836	0.513403	2.39748e-06	2.99409e-05
ENSG00000108651	UTP6	6.57482	6.6196	6.51935	6.00545	6.07955	5.94675	6.50042	6.44778	6.34779	6.00007	5.95797	5.89638	-0.560722	0.677963	9.99108e-08	9.02349e-06	7.00039	-0.139448	0.907867	0.0405454	0.139415	-0.6197	0.650806	2.38311e-08	7.94073e-07
ENSG00000129480	DTD2	4.63114	4.71823	4.712	3.88829	3.67904	3.83422	4.62341	4.41586	4.39411	3.84091	3.92695	3.76352	-0.886582	0.540894	9.99898e-08	9.02349e-06	7.00004	-0.209443	0.864871	0.0444177	0.148101	-0.842957	0.5575	1.8422e-07	3.74895e-06
ENSG00000079739	PGM1	6.53085	6.60455	6.48635	7.30477	7.25679	7.24352	6.56949	6.37766	6.31743	7.31719	7.27644	7.07184	0.727676	1.65597	1.04363e-07	9.36239e-06	6.98145	-0.119295	0.920637	0.185111	0.393959	0.681532	1.60384	2.60732e-07	4.99741e-06
ENSG00000170522	ELOVL6	6.45069	6.46272	6.5558	7.04034	7.07362	7.27824	6.28574	6.29287	6.35447	6.84135	6.91155	7.0614	0.640941	1.55935	1.10153e-07	9.82366e-06	6.95801	-0.178555	0.883588	0.0317896	0.117437	0.44808	1.36422	1.2878e-05	0.000117829
ENSG00000221955	SLC12A8	4.53221	4.62237	4.4211	5.15738	5.09929	5.12219	4.51601	4.39	4.49739	4.99211	4.84835	4.8414	0.600719	1.51647	1.11742e-07	9.90717e-06	6.95178	-0.057794	0.960732	0.433957	0.660318	0.368697	1.29119	6.10933e-05	0.000418732
ENSG00000078043	PIAS2	5.15538	5.1667	5.19368	4.35036	4.4806	4.51601	5.0374	4.96631	5.13391	4.30098	4.35556	4.4937	-0.723056	0.605813	1.12545e-07	9.9203e-06	6.94867	-0.125926	0.916416	0.134474	0.317563	-0.789053	0.578724	3.27664e-08	1.02427e-06
ENSG00000112078	KCTD20	6.78772	6.71661	6.72514	5.92106	6.03545	6.08062	6.68739	6.82139	6.69268	5.96088	6.04679	6.2898	-0.730911	0.602524	1.13808e-07	9.97367e-06	6.94383	-0.00935655	0.993536	0.910167	0.977131	-0.644683	0.639633	5.90248e-07	9.70581e-06
ENSG00000154265	ABCA5	3.3495	3.36723	3.54183	2.09128	2.27796	2.24337	3.39795	3.66258	3.43513	1.96104	2.39558	2.51757	-1.21507	0.430754	1.15139e-07	1.00323e-05	6.93878	0.0794032	1.05658	0.545777	0.750048	-1.12899	0.457237	2.84556e-07	5.35255e-06
ENSG00000104331	IMPAD1	5.59623	5.56481	5.83362	6.4755	6.45478	6.48476	5.78583	5.72942	5.85845	6.30698	6.3796	6.50643	0.807178	1.74979	1.18793e-07	1.01708e-05	6.92521	0.126784	1.09186	0.205178	0.420423	0.732797	1.66186	4.60051e-07	7.91695e-06
ENSG00000111752	PHC1	4.57367	4.52816	4.68986	3.89539	3.65463	3.75627	4.59394	4.61082	4.70651	3.67716	3.80124	3.79932	-0.828052	0.563289	1.19145e-07	1.01708e-05	6.92392	0.040246	1.02829	0.660984	0.831015	-0.837975	0.559428	9.65354e-08	2.26559e-06
ENSG00000239887	C1orf226	4.22609	4.32097	4.55608	5.18146	5.14418	5.25585	4.334	4.33239	4.66207	5.15161	5.01167	5.01407	0.826548	1.77344	1.19395e-07	1.01708e-05	6.92301	0.0758793	1.054	0.458916	0.682279	0.692223	1.61577	1.42245e-06	1.98946e-05
ENSG00000183496	MEX3B	1.54886	1.51653	1.9099	2.92797	2.92303	2.9916	1.96159	2.11514	2.34568	3.28102	3.28869	3.44687	1.28937	2.44422	1.19411e-07	1.01708e-05	6.92295	0.482925	1.39757	0.00652786	0.0374315	1.68024	3.20481	1.68497e-09	1.15592e-07
ENSG00000137040	RANBP6	5.54826	5.64593	5.67162	4.66388	4.8525	4.88667	5.25823	5.56393	5.31477	4.38277	4.39471	4.59857	-0.821064	0.566024	1.21111e-07	1.02063e-05	6.91682	-0.242877	0.845059	0.0169824	0.0750203	-1.16388	0.446312	9.45923e-10	7.54797e-08
ENSG00000139725	RHOF	6.44019	6.49134	6.41759	7.16085	7.01515	7.07662	6.61012	6.63489	6.76133	7.34546	7.27824	7.26073	0.634453	1.55235	1.21658e-07	1.02063e-05	6.91486	0.219058	1.16397	0.00934699	0.0486413	0.845137	1.79644	1.55175e-09	1.08415e-07
ENSG00000158104	HPD	-0.542621	-0.504562	-0.393936	0.568175	0.565884	0.319659	-0.429938	-0.302045	-0.304525	0.739774	0.846251	0.446682	0.965088	1.95218	1.22059e-07	1.02063e-05	6.91343	0.134933	1.09804	0.250977	0.476526	1.15832	2.23197	8.04889e-09	3.49654e-07
ENSG00000169139	UBE2V2	6.65405	6.70108	6.63889	6.00361	6.04698	6.09807	6.51966	6.49932	6.37497	6.01441	6.07057	5.91168	-0.615264	0.652811	1.22521e-07	1.02063e-05	6.91179	-0.200161	0.870454	0.0108689	0.0540983	-0.665594	0.630429	3.98965e-08	1.16545e-06
ENSG00000241978	AKAP2	5.97625	5.78504	6.06431	6.93576	6.92629	6.99506	5.97463	5.9902	6.37091	6.76303	6.769	6.93576	1.01078	2.015	1.26412e-07	1.04728e-05	6.89821	0.170562	1.1255	0.178965	0.385278	0.880708	1.84128	8.72046e-07	1.32875e-05
ENSG00000178951	ZBTB7A	4.66778	4.56548	4.71956	5.53084	5.49437	5.24575	4.97906	5.01743	5.11894	5.74905	5.81733	5.66985	0.773264	1.70913	1.28006e-07	1.05473e-05	6.89277	0.38788	1.30847	0.000564402	0.00587296	1.09496	2.13607	5.72075e-10	5.22983e-08
ENSG00000185215	TNFAIP2	4.91534	4.99753	5.04772	5.56748	5.57568	5.54117	5.00128	4.92635	5.11763	5.37532	5.35671	5.42567	0.57474	1.48941	1.2948e-07	1.06111e-05	6.8878	0.028436	1.01991	0.685244	0.847941	0.39902	1.31861	1.61658e-05	0.00014118
ENSG00000204604	ZNF468	4.05898	4.05584	4.27731	5.0798	4.99995	5.07319	4.56434	4.42512	4.6218	5.21479	5.25564	5.50642	0.920718	1.89306	1.3585e-07	1.10733e-05	6.86694	0.406896	1.32583	0.00188165	0.0147812	1.19463	2.28886	2.35753e-09	1.4297e-07
ENSG00000163162	RNF149	4.88685	4.93867	5.00566	5.65096	5.64922	5.80497	5.00766	5.08601	5.01856	5.63705	5.58752	5.70432	0.757995	1.69114	1.43876e-07	1.16647e-05	6.84201	0.0938379	1.06721	0.322375	0.554329	0.699195	1.6236	4.42239e-07	7.67138e-06
ENSG00000146826	C7orf43	3.71801	3.75627	3.64936	4.58705	4.4532	4.34884	4.01413	4.04573	4.05215	4.76693	4.65097	4.61862	0.75522	1.68789	1.46401e-07	1.18063e-05	6.83445	0.329277	1.25638	0.00213501	0.0162576	0.971132	1.96038	2.95193e-09	1.65756e-07
ENSG00000033100	CHPF2	4.41945	4.36877	4.23163	5.18085	5.1425	4.98248	4.6178	4.67174	4.85169	5.39051	5.24104	5.44039	0.761908	1.69573	1.48314e-07	1.18973e-05	6.82882	0.373645	1.29562	0.000774662	0.00741456	1.01681	2.02344	1.70605e-09	1.16511e-07
ENSG00000164219	PGGT1B	5.44413	5.3879	5.44079	4.77572	4.92559	4.82743	5.36102	5.49156	5.34175	4.99089	5.05062	4.97468	-0.581314	0.668355	1.49353e-07	1.19176e-05	6.82579	-0.026121	0.982057	0.697996	0.85569	-0.418715	0.748091	9.27386e-06	8.96349e-05
ENSG00000180758	GPR157	3.98071	3.93768	3.99771	4.69479	4.56333	4.50485	3.68972	3.85193	3.89188	4.71322	4.71487	4.65789	0.615941	1.53256	1.5079e-07	1.19693e-05	6.82163	-0.160618	0.894641	0.0505413	0.162068	0.72358	1.65128	1.29353e-08	5.00132e-07
ENSG00000105088	OLFM2	3.13041	3.20382	3.11085	4.29458	4.067	4.15259	3.09255	2.65312	3.20187	4.20546	4.25347	4.14813	1.02298	2.03212	1.51748e-07	1.19825e-05	6.81888	-0.165884	0.891382	0.219122	0.4392	1.05408	2.07639	9.31841e-08	2.2109e-06
ENSG00000145107	TM4SF19	1.90465	1.64527	1.52867	0.831315	0.803455	0.71581	1.4142	1.33779	1.27632	0.433037	0.450543	0.436431	-0.909456	0.532386	1.52998e-07	1.20187e-05	6.81531	-0.350291	0.784426	0.00411633	0.0265216	-1.25302	0.419568	1.49961e-09	1.05257e-07
ENSG00000172878	METAP1D	3.91058	3.89713	3.86788	4.43162	4.4887	4.44948	3.89803	3.69924	3.72275	4.21092	4.24311	4.24432	0.564664	1.47904	1.60253e-07	1.25237e-05	6.79519	-0.118701	0.921017	0.107609	0.272911	0.340771	1.26643	9.73388e-05	0.000611078
ENSG00000183723	CMTM4	6.22028	6.01097	6.29944	7.04312	7.04222	7.02042	6.26425	6.31797	6.44973	6.93226	6.94425	7.12778	0.858695	1.8134	1.65055e-07	1.27356e-05	6.78237	0.167489	1.1231	0.127991	0.306116	0.824487	1.77091	2.88173e-07	5.40048e-06
ENSG00000091879	ANGPT2	2.91283	2.63547	2.55337	1.70584	1.27274	1.8151	3.02904	3.12202	2.8482	1.93933	1.97756	2.14549	-1.10308	0.465523	1.65184e-07	1.27356e-05	6.78203	0.298788	1.23011	0.0245736	0.0977751	-0.680539	0.623932	5.58701e-05	0.000388732
ENSG00000136098	NEK3	4.25816	4.29284	4.03225	3.43076	3.51731	3.24549	4.06772	4.05344	3.86486	3.12662	3.37396	3.30946	-0.796807	0.575622	1.65485e-07	1.27356e-05	6.78124	-0.199751	0.870701	0.041192	0.141062	-0.925311	0.526567	2.11249e-08	7.18106e-07
ENSG00000073712	FERMT2	4.48381	4.53957	4.6155	5.19654	5.33117	5.41011	4.40178	4.63114	4.72091	5.10853	5.01007	5.24874	0.766297	1.7009	1.69438e-07	1.2974e-05	6.77099	0.0387036	1.02719	0.688652	0.850128	0.575847	1.49055	7.96862e-06	7.88591e-05
ENSG00000143742	SRP9	8.51505	8.71658	8.71658	8.03535	8.10205	8.20548	8.54983	8.58862	8.4185	8.13743	8.11638	8.12027	-0.535162	0.690081	1.74253e-07	1.32756e-05	6.75882	-0.130419	0.913566	0.0535611	0.16914	-0.524648	0.695129	2.23766e-07	4.38309e-06
ENSG00000137936	BCAR3	4.99196	4.996	5.02017	5.59066	5.51471	5.51239	4.98375	4.96717	5.10127	5.35428	5.35919	5.27271	0.536651	1.4506	1.78752e-07	1.35179e-05	6.74775	0.0148127	1.01032	0.82462	0.930144	0.326281	1.25378	9.459e-05	0.000596787
ENSG00000145391	SETD7	7.03099	6.88184	7.23931	8.09485	8.11877	8.13983	7.18428	7.25518	7.46502	7.95515	7.9891	8.19384	1.06747	2.09575	1.79217e-07	1.35179e-05	6.74662	0.251275	1.19026	0.0711873	0.205732	0.995349	1.99356	4.7412e-07	8.11303e-06
ENSG00000126391	FRMD8	5.22383	5.254	5.26378	4.62955	4.60261	4.57627	5.49999	5.47421	5.37771	4.84056	4.84188	4.98502	-0.644302	0.639802	1.84157e-07	1.38218e-05	6.73481	0.203396	1.15141	0.0126992	0.0610438	-0.358454	0.78	0.000176857	0.000999751
ENSG00000112796	ENPP5	2.68213	2.76928	2.75977	3.62926	3.64685	3.70881	2.67213	2.86751	2.91811	3.20522	3.49916	3.62584	0.924501	1.89803	1.87105e-07	1.39682e-05	6.72792	0.0823611	1.05875	0.489202	0.707465	0.705231	1.63041	7.50557e-06	7.55591e-05
ENSG00000179388	EGR3	1.19443	1.15775	1.33503	-0.354227	-0.675199	0.0892545	1.46226	1.60871	1.29012	0.0150197	0.409559	0.427892	-1.54249	0.343291	1.8795e-07	1.39682e-05	6.72596	0.224689	1.16853	0.224125	0.445576	-0.945069	0.519405	7.37234e-05	0.000487449
ENSG00000165244	ZNF367	4.55857	4.38658	4.50178	5.52254	5.56748	5.52656	3.23141	3.43875	3.08847	4.37246	4.26628	3.68972	1.05671	2.08018	1.89346e-07	1.40033e-05	6.72274	-1.2294	0.426494	1.84923e-07	1.10379e-05	-0.370461	0.773535	0.0151407	0.038999
ENSG00000260912	RP11-363E7.4	2.03152	2.21192	2.27018	1.22366	1.13679	0.867263	3.90822	4.08563	3.65463	3.24952	3.25205	3.32031	-1.095	0.468137	1.92119e-07	1.41394e-05	6.71643	1.71157	3.27517	2.9142e-11	1.29948e-08	1.10268	2.14753	3.96658e-08	1.16545e-06
ENSG00000164674	SYTL3	6.60455	6.6887	6.55047	7.2358	7.15642	7.18189	6.75257	6.63698	6.59682	7.23469	7.1746	7.04081	0.576667	1.4914	1.9749e-07	1.44644e-05	6.70446	0.0473319	1.03335	0.512324	0.724512	0.535628	1.44957	5.42318e-07	9.07515e-06
ENSG00000112079	STK38	5.52498	5.42956	5.58972	6.02027	6.0331	6.05102	5.5621	5.58674	5.61556	5.96769	6.01177	6.12952	0.520241	1.4342	1.99559e-07	1.44883e-05	6.69993	0.0736249	1.05236	0.264484	0.491884	0.521463	1.43541	1.87504e-07	3.80287e-06
ENSG00000134375	TIMM17A	7.18661	7.36728	7.33392	6.5988	6.69607	6.72074	7.32807	7.28579	7.24253	6.85907	6.84187	6.89791	-0.62414	0.648806	1.99727e-07	1.44883e-05	6.69956	-0.0104949	0.992752	0.887626	0.966274	-0.429731	0.7424	2.10518e-05	0.000174756
ENSG00000103855	CD276	6.5956	6.58746	6.54796	7.25227	7.19852	7.13549	6.42942	6.40033	6.5437	7.18055	7.15163	7.07426	0.618439	1.53521	2.07413e-07	1.49742e-05	6.68316	-0.119193	0.920703	0.138959	0.324767	0.558597	1.47284	8.35069e-07	1.28586e-05
ENSG00000121964	GTDC1	3.9185	3.98234	3.97227	3.35788	3.38297	3.36962	3.80204	3.74292	3.65463	3.22626	3.10172	3.15812	-0.587545	0.665474	2.11481e-07	1.51955e-05	6.67473	-0.224597	0.855834	0.00467001	0.0290291	-0.795549	0.576124	3.02454e-09	1.68078e-07
ENSG00000122707	RECK	2.76208	2.5065	2.44811	1.37699	1.43093	1.57154	2.54525	2.92153	2.77372	1.44639	1.19953	1.49196	-1.11272	0.462422	2.26491e-07	1.61973e-05	6.64495	0.174505	1.12858	0.186005	0.395086	-1.19329	0.437304	8.59054e-08	2.09391e-06
ENSG00000168795	ZBTB5	6.34998	6.28137	6.28933	5.70704	5.70931	5.76926	6.79845	6.8284	6.93145	6.30354	6.31797	6.55485	-0.578426	0.669694	2.28966e-07	1.62974e-05	6.64023	0.54592	1.45995	2.56281e-07	1.39765e-05	0.0846857	1.06046	0.229517	0.351025
ENSG00000171861	RNMTL1	5.40314	5.46699	5.33613	4.71899	4.74711	4.63796	5.22859	5.12131	5.06655	4.7611	4.88431	4.65493	-0.700805	0.615229	2.31462e-07	1.63981e-05	6.63552	-0.263548	0.833037	0.00537862	0.0321171	-0.635052	0.643918	7.95914e-07	1.23763e-05
ENSG00000169016	E2F6	5.73386	5.78666	5.8006	5.26535	5.25204	5.23784	5.60313	5.69046	5.57237	5.22191	5.26294	5.31879	-0.521899	0.696455	2.32573e-07	1.64002e-05	6.63344	-0.151703	0.900187	0.0258291	0.101161	-0.506025	0.70416	3.38097e-07	6.19068e-06
ENSG00000162290	DCP1A	6.42762	6.28017	6.49157	5.30233	5.4019	5.43692	6.50865	6.68503	6.66806	5.52969	5.50656	5.80015	-1.01928	0.493362	2.33793e-07	1.64099e-05	6.63117	0.221089	1.16561	0.0753394	0.213369	-0.788085	0.579112	5.64491e-06	5.95979e-05
ENSG00000169919	GUSB	5.00651	5.17424	4.91008	4.23916	4.21353	4.29178	5.14085	4.95893	4.88496	4.57401	4.40277	4.30733	-0.782626	0.581308	2.35026e-07	1.64204e-05	6.62888	-0.0359325	0.975401	0.696069	0.854468	-0.60194	0.658868	5.95028e-06	6.23271e-05
ENSG00000164251	F2RL1	6.94899	6.93992	7.03961	7.38545	7.41732	7.43435	6.91649	6.80338	6.98261	7.17357	7.18732	7.19943	0.436293	1.35312	2.47148e-07	1.71882e-05	6.60704	-0.0751901	0.949217	0.183815	0.392234	0.210681	1.15723	0.00105941	0.00435866
ENSG00000196787	HIST1H2AG	0.664849	0.96722	0.475805	1.78265	1.8261	1.60305	1.49475	1.33779	1.51653	2.29964	2.19455	2.30669	1.03452	2.04842	2.55388e-07	1.76801e-05	6.5928	0.746821	1.67809	1.84962e-05	0.000406406	1.56398	2.95668	3.85534e-10	3.82902e-08
ENSG00000131236	CAP1	8.92352	8.94388	8.89958	8.56467	8.60377	8.6153	8.88355	8.85163	8.8899	8.55694	8.56024	8.58862	-0.327806	0.796747	2.56755e-07	1.76939e-05	6.59048	-0.0473299	0.967726	0.250611	0.476248	-0.353803	0.782519	8.7209e-08	2.11548e-06
ENSG00000163785	RYK	6.18933	6.13612	6.21186	6.6922	6.67993	6.74525	6.34338	6.21275	6.31366	6.71726	6.6783	6.83345	0.526724	1.44065	2.58458e-07	1.77307e-05	6.58761	0.110906	1.07991	0.109254	0.275484	0.563719	1.47807	9.51803e-08	2.24073e-06
ENSG00000164938	TP53INP1	5.4416	5.3177	5.56556	3.7352	3.86825	4.08151	7.78948	8.10492	7.99364	6.3303	6.4211	7.00483	-1.54671	0.342289	2.6432e-07	1.80378e-05	6.57787	2.52147	5.74165	7.5406e-12	4.76346e-09	1.14276	2.20804	1.80904e-06	2.3891e-05
ENSG00000153815	CMIP	5.82738	5.74031	5.76672	6.49365	6.37378	6.36379	5.93863	5.97407	6.19535	6.50976	6.49562	6.45299	0.632365	1.5501	2.65314e-07	1.80378e-05	6.57624	0.258009	1.19583	0.00444603	0.0280522	0.70811	1.63366	5.00423e-08	1.39209e-06
ENSG00000094880	CDC23	6.84451	6.85584	6.80359	6.28881	6.42364	6.42217	6.71741	6.75133	6.68302	6.33705	6.28709	6.2976	-0.456593	0.728705	2.66542e-07	1.80403e-05	6.57424	-0.117476	0.921799	0.0481568	0.156843	-0.527409	0.6938	3.50471e-08	1.06911e-06
ENSG00000172789	HOXC5	0.999054	0.945834	0.921892	0.174802	0.140111	0.182342	0.915003	0.612468	0.880219	0.33315	0.289622	0.137769	-0.789872	0.578396	2.71997e-07	1.82832e-05	6.56544	-0.153052	0.899346	0.128726	0.307294	-0.701937	0.614746	1.291e-06	1.84129e-05
ENSG00000087274	ADD1	7.15473	7.17555	7.13549	7.5735	7.54534	7.55817	7.37426	7.36988	7.42903	7.60012	7.59428	7.69153	0.403707	1.3229	2.72541e-07	1.82832e-05	6.56457	0.235777	1.17754	0.000191523	0.00257876	0.473195	1.38818	2.70382e-08	8.77785e-07
ENSG00000162735	PEX19	5.54587	5.47789	5.50773	5.02438	5.05778	4.95946	5.6013	5.53179	5.40616	5.04408	5.06567	5.12517	-0.496515	0.708817	2.74755e-07	1.83505e-05	6.56105	0.00250966	1.00174	0.966764	1	-0.432386	0.741035	1.60256e-06	2.16352e-05
ENSG00000112242	E2F3	6.37766	6.32238	6.39952	5.84614	5.8155	5.80964	6.27037	6.36403	6.28832	5.67398	5.738	5.82376	-0.542648	0.68651	2.76326e-07	1.83745e-05	6.55858	-0.0588583	0.960024	0.379974	0.608448	-0.621496	0.649996	4.14402e-08	1.199e-06
ENSG00000110013	SIAE	5.07784	5.13314	5.09275	5.63032	5.59774	5.70098	5.36733	5.26107	5.21028	5.89589	5.83186	5.92694	0.541641	1.45563	2.77696e-07	1.83849e-05	6.55643	0.178182	1.13146	0.017686	0.0772285	0.783489	1.72129	1.02769e-09	7.90904e-08
ENSG00000115107	STEAP3	5.38906	5.37288	5.35052	6.08636	5.94657	5.80717	5.49108	5.43279	5.45318	6.17826	6.18147	6.10619	0.576057	1.49077	2.81504e-07	1.8556e-05	6.55051	0.0881335	1.06299	0.241336	0.466459	0.7846	1.72261	2.69612e-09	1.56015e-07
ENSG00000012174	MBTPS2	4.94197	4.82757	4.94625	5.44466	5.67707	5.5216	4.79415	4.8262	4.74056	5.25923	5.28452	5.27397	0.642672	1.56122	2.85364e-07	1.8729e-05	6.5446	-0.118159	0.921363	0.171091	0.373224	0.367465	1.29008	0.00025823	0.0013646
ENSG00000085788	DDHD2	5.74244	5.73272	5.73401	5.08116	5.15329	5.17543	5.42956	5.51334	5.28536	4.68322	4.82529	4.77639	-0.599851	0.659822	2.97644e-07	1.94002e-05	6.5263	-0.327061	0.797159	0.000324917	0.00390617	-0.974926	0.508766	3.09354e-10	3.23456e-08
ENSG00000119640	ACYP1	3.76707	3.93768	4.16475	3.10412	3.22512	3.17367	3.77449	3.76887	3.71706	3.43189	3.36884	3.29737	-0.788347	0.579007	2.98149e-07	1.94002e-05	6.52557	-0.202505	0.86904	0.0447659	0.148837	-0.589511	0.664568	1.0208e-05	9.70308e-05
ENSG00000221890	NPTXR	4.35843	4.17995	4.14749	4.9284	4.86598	4.85387	4.06417	3.85599	4.11727	4.77336	4.66471	4.55777	0.654043	1.57357	3.0118e-07	1.94578e-05	6.52117	-0.216243	0.860804	0.0217564	0.0894451	0.437098	1.35388	5.21442e-05	0.000367531
ENSG00000121671	CRY2	4.91579	4.9571	4.61424	4.10744	4.03592	4.09087	4.92353	5.09338	5.0231	4.33322	4.08105	4.11884	-0.751612	0.593939	3.01602e-07	1.94578e-05	6.52057	0.183696	1.13579	0.0505164	0.162057	-0.651498	0.636619	1.76475e-06	2.33672e-05
ENSG00000133731	IMPA1	6.6871	6.73216	6.77856	6.07918	6.05537	6.22623	6.78973	6.79812	6.63293	6.06542	6.16224	6.19732	-0.612407	0.654105	3.10029e-07	1.99168e-05	6.5086	0.00766063	1.00532	0.918668	0.981721	-0.5911	0.663837	4.81123e-07	8.17371e-06
ENSG00000197635	DPP4	7.15029	7.08185	7.06911	7.5463	7.57444	7.53956	7.0009	6.90067	6.81093	7.48745	7.52246	7.41212	0.452988	1.36887	3.12172e-07	1.99698e-05	6.50561	-0.196361	0.872749	0.00330688	0.0225227	0.373696	1.29567	4.0038e-06	4.49975e-05
ENSG00000049449	RCN1	7.82399	7.87303	7.76695	8.17732	8.19384	8.29502	7.81492	7.82779	7.77682	8.22452	8.20548	8.26163	0.400575	1.32003	3.25468e-07	2.07328e-05	6.48749	-0.0149225	0.98971	0.771328	0.899791	0.409064	1.32782	2.38105e-07	4.62808e-06
ENSG00000151743	AMN1	4.84072	4.85992	4.8262	4.13882	4.12539	4.29434	4.83224	4.66526	4.76505	4.21681	4.18338	4.3439	-0.656377	0.63447	3.29058e-07	2.07947e-05	6.48273	-0.0881847	0.940706	0.277527	0.506365	-0.594768	0.662151	1.11364e-06	1.62189e-05
ENSG00000110880	CORO1C	7.51139	7.47781	7.45417	7.84174	7.85925	7.8391	7.30837	7.36836	7.35805	7.68827	7.62935	7.63788	0.365543	1.28837	3.29182e-07	2.07947e-05	6.48256	-0.136213	0.909904	0.00908098	0.0475403	0.170732	1.12563	0.00164365	0.00628008
ENSG00000104691	UBXN8	3.52879	3.66258	3.69795	4.34516	4.38772	4.29862	3.5953	3.52334	3.24816	4.12081	4.1127	4.05809	0.71428	1.64066	3.33948e-07	2.10082e-05	6.47632	-0.174276	0.886212	0.0824397	0.226919	0.467771	1.38297	7.25087e-05	0.000481517
ENSG00000092531	SNAP23	5.71164	5.81733	5.8613	5.17208	5.29482	5.34365	5.83362	5.80085	5.77536	5.26754	5.33199	5.44709	-0.526629	0.694175	3.37191e-07	2.11246e-05	6.47212	0.00659134	1.00458	0.919114	0.982008	-0.448207	0.732953	2.60537e-06	3.20878e-05
ENSG00000112245	PTP4A1	9.07796	9.05135	9.19857	8.60787	8.72285	8.71658	9.40997	9.49527	9.46548	8.89306	8.99178	8.99613	-0.426781	0.74392	3.41173e-07	2.12861e-05	6.46702	0.347749	1.27257	3.81603e-06	0.000118798	-0.148949	0.901907	0.0117432	0.0315839
ENSG00000116171	SCP2	5.53063	5.55385	5.7286	6.06375	6.03779	6.15867	5.6648	5.66249	5.66969	6.28676	6.26112	6.23421	0.482556	1.39722	3.47884e-07	2.16159e-05	6.45857	0.061576	1.04361	0.330952	0.563138	0.656708	1.57648	3.52081e-09	1.89076e-07
ENSG00000253276	CCDC71L	2.33843	2.36004	2.41361	3.26655	3.32462	3.04558	2.69032	2.56591	2.80366	3.52303	3.57761	3.47749	0.841981	1.79251	3.53123e-07	2.18518e-05	6.45207	0.316123	1.24498	0.00979347	0.0502807	1.15566	2.22786	2.62475e-09	1.5481e-07
ENSG00000250565	ATP6V1E2	3.11969	3.20073	3.15047	3.8158	3.98174	3.83609	2.87626	3.13243	3.12167	3.95715	3.88723	3.78422	0.720883	1.64819	3.55206e-07	2.18914e-05	6.44952	-0.113429	0.924388	0.250431	0.476205	0.719696	1.64683	3.49225e-07	6.3392e-06
ENSG00000204839	C8orf73	3.77747	3.86759	3.76543	5.27251	5.12637	4.80355	3.80204	3.53635	3.57041	4.8696	5.13334	4.67089	1.26432	2.40214	3.62562e-07	2.22543e-05	6.44062	-0.167537	0.890361	0.347123	0.578757	1.08843	2.12643	2.87129e-06	3.46865e-05
ENSG00000073060	SCARB1	7.32807	7.29444	7.2034	7.87984	7.79209	7.7636	7.34149	7.22011	7.27824	7.87579	7.89921	7.76557	0.53649	1.45044	3.66851e-07	2.24267e-05	6.43551	0.00451561	1.00313	0.948278	0.998104	0.57163	1.4862	1.46896e-07	3.09318e-06
ENSG00000105948	TTC26	4.40963	4.34597	4.4039	3.74044	3.92948	3.82778	4.34641	4.28749	4.37378	3.7647	3.66423	3.60864	-0.553895	0.681179	3.84336e-07	2.34012e-05	6.41529	-0.050489	0.965609	0.463773	0.687049	-0.706786	0.612684	1.32855e-08	5.08051e-07
ENSG00000086300	SNX10	5.45701	5.5795	5.5156	4.76666	4.86721	5.01208	5.11541	5.20992	4.94069	4.46608	4.53566	4.44948	-0.635725	0.643617	3.90111e-07	2.36579e-05	6.40881	-0.428871	0.742843	4.4817e-05	0.00081569	-1.03357	0.4885	4.40073e-10	4.24965e-08
ENSG00000183665	TRMT12	5.36908	5.43424	5.28079	4.72488	4.8542	4.80957	5.40431	5.25416	5.33913	4.77537	4.83058	4.90589	-0.565453	0.675743	3.98976e-07	2.40991e-05	6.39905	-0.029101	0.980031	0.679166	0.844381	-0.52469	0.695109	1.00737e-06	1.48568e-05
ENSG00000226887	ERVMER34-1	4.9574	4.87412	5.00477	5.55231	5.59282	5.54259	4.71175	4.73267	4.88094	5.06549	5.13606	5.15424	0.617373	1.53408	4.0211e-07	2.4192e-05	6.39565	-0.169987	0.888851	0.0525112	0.166727	0.173175	1.12754	0.0440316	0.0934177
ENSG00000131370	SH3BP5	4.23231	4.19864	4.43304	5.04321	4.94591	5.05888	4.46051	4.60759	4.79834	4.996	5.02134	5.24385	0.728424	1.65683	4.08734e-07	2.44933e-05	6.38856	0.33484	1.26124	0.00244883	0.0179896	0.798843	1.73971	1.03712e-07	2.38963e-06
ENSG00000160075	SSU72	6.08955	6.17534	5.98981	6.95798	6.92488	6.89986	6.15737	6.04828	6.05741	6.99951	6.93344	6.74656	0.842487	1.79314	4.19425e-07	2.5035e-05	6.37735	0.00251883	1.00175	0.982108	1	0.808519	1.75141	7.26373e-07	1.15194e-05
ENSG00000118785	SPP1	1.78265	1.65057	1.46129	0.309149	0.093622	0.665094	1.58638	1.61828	1.61327	0.660501	0.808569	0.053304	-1.2759	0.412967	4.2946e-07	2.55335e-05	6.36708	-0.0257207	0.98233	0.872241	0.957363	-1.12361	0.458943	2.19806e-06	2.80735e-05
ENSG00000115604	IL18R1	1.19443	0.90794	1.28922	0.1154	-0.204486	0.272711	0.377627	0.294216	0.401712	-0.390772	-0.252896	-0.632743	-1.06919	0.476586	4.34679e-07	2.57057e-05	6.36183	-0.772458	0.585419	2.46055e-05	0.000509622	-1.5556	0.340187	2.09694e-09	1.31655e-07
ENSG00000196981	WDR5B	2.46633	2.63892	2.66811	1.91378	1.94755	1.95879	2.6517	2.68269	2.72169	2.02458	1.92299	1.94755	-0.650983	0.636846	4.35748e-07	2.57057e-05	6.36076	0.0944138	1.06763	0.250547	0.476247	-0.62584	0.648042	7.06229e-07	1.12825e-05
ENSG00000187522	HSPA14	6.37091	6.34537	6.32031	5.90382	5.93751	5.87938	6.07936	6.11432	6.01769	5.72791	5.66875	5.58878	-0.438639	0.73783	4.44831e-07	2.61398e-05	6.35181	-0.275145	0.826367	0.000115988	0.00174179	-0.683474	0.622664	7.80862e-10	6.65092e-08
ENSG00000197223	C1D	4.78758	5.04913	5.05566	4.20739	4.19203	4.2992	4.8131	4.80615	4.65812	4.27018	4.1869	4.23342	-0.731254	0.60238	4.54554e-07	2.66081e-05	6.34241	-0.20498	0.867551	0.0357048	0.12728	-0.733784	0.601325	4.13987e-07	7.28126e-06
ENSG00000155660	PDIA4	8.40388	8.44916	8.33355	8.78167	8.75525	8.7891	8.82627	8.85325	8.71279	9.08718	9.04574	8.99178	0.379705	1.30108	4.57424e-07	2.66731e-05	6.33968	0.401775	1.32113	2.08633e-07	1.22926e-05	0.646057	1.56489	1.53892e-10	1.92243e-08
ENSG00000167202	TBC1D2B	4.92493	4.87668	4.97846	4.03285	4.14367	4.19287	4.60261	4.72651	4.8708	3.72786	3.74109	4.0074	-0.803569	0.57293	4.60368e-07	2.67419e-05	6.3369	-0.193036	0.874763	0.0659478	0.195286	-1.102	0.46587	6.56214e-09	2.9787e-07
ENSG00000197565	COL4A6	1.57213	1.29196	1.2268	2.30164	2.05835	2.15692	1.5517	1.47271	1.6922	2.02898	2.14095	2.15692	0.808653	1.75158	4.62955e-07	2.67895e-05	6.33446	0.208516	1.1555	0.0652153	0.193833	0.744968	1.67594	1.39807e-06	1.96991e-05
ENSG00000138942	RNF185	5.28573	5.28252	5.18729	4.75811	4.75473	4.59648	5.61162	5.54398	5.62848	5.21864	5.11611	5.22928	-0.548689	0.683641	4.65962e-07	2.6861e-05	6.33165	0.342696	1.26812	7.85304e-05	0.0012761	-0.064109	0.956536	0.357747	0.493567
ENSG00000163596	ICA1L	1.62159	1.403	1.30024	0.65064	0.260166	0.569201	1.03914	1.19756	1.06781	0.489372	0.376468	0.597434	-0.948399	0.518207	4.69951e-07	2.68798e-05	6.32795	-0.340222	0.78992	0.0112175	0.0553872	-0.954102	0.516163	4.28059e-07	7.50267e-06
ENSG00000174206	C12orf66	3.65272	3.68972	3.63939	4.3859	4.42169	4.37227	3.68552	3.61495	3.53116	4.37568	4.24744	4.3601	0.732619	1.66165	4.70176e-07	2.68798e-05	6.32774	-0.0502595	0.965763	0.616852	0.801516	0.666972	1.58774	1.66349e-06	2.23188e-05
ENSG00000115365	LANCL1	6.78567	6.7883	6.86084	6.21524	6.28459	6.37611	6.63266	6.7216	6.60921	6.01441	6.09614	6.1015	-0.519655	0.697539	4.71607e-07	2.68798e-05	6.32642	-0.157035	0.896867	0.0280167	0.106912	-0.74097	0.598337	3.16764e-09	1.73374e-07
ENSG00000155254	MARVELD1	5.2661	5.28326	5.02769	5.97463	5.93701	5.87035	5.46919	5.30075	5.42884	6.10587	6.11162	5.93684	0.734614	1.66395	4.81523e-07	2.73422e-05	6.31738	0.206783	1.15411	0.0467173	0.153109	0.859018	1.8138	4.87182e-08	1.3581e-06
ENSG00000001630	CYP51A1	8.09485	8.09485	8.16083	8.669	8.6153	8.70146	8.25438	8.42364	8.32391	8.64965	8.73378	8.85325	0.54511	1.45913	4.85225e-07	2.74496e-05	6.31406	0.217209	1.16248	0.00676445	0.038429	0.628523	1.54598	6.31762e-08	1.62617e-06
ENSG00000127022	CANX	9.8055	9.70748	9.9233	10.3854	10.4334	10.4177	9.93351	10.0922	10.0695	10.2928	10.3303	10.4772	0.6002	1.51593	4.96132e-07	2.79213e-05	6.3044	0.219828	1.16459	0.011655	0.0570758	0.554619	1.46878	1.42101e-06	1.98938e-05
ENSG00000242125	SNHG3	5.09637	5.33068	5.37254	4.489	4.54008	4.63439	5.46748	5.40715	5.44413	4.81672	4.75726	4.92405	-0.71205	0.610452	4.97246e-07	2.79213e-05	6.30343	0.173213	1.12757	0.0615263	0.186002	-0.434081	0.740165	0.000145453	0.000852419
ENSG00000039068	CDH1	6.39726	6.31541	6.35499	6.92107	6.86433	6.93145	6.4666	6.48032	6.54198	6.94352	7.00962	7.04616	0.549735	1.46382	5.06779e-07	2.83516e-05	6.29518	0.140473	1.10227	0.0673292	0.198194	0.643743	1.56238	5.16218e-08	1.41767e-06
ENSG00000082781	ITGB5	6.15072	6.16474	5.95029	6.90874	6.81439	6.77726	6.11162	6.00084	5.96982	6.93497	6.90915	6.61785	0.744682	1.6756	5.11747e-07	2.84067e-05	6.29094	-0.0615058	0.958263	0.543367	0.748091	0.732421	1.66142	6.28583e-07	1.02143e-05
ENSG00000139438	FAM222A	1.69977	1.99596	1.34533	2.73872	2.92303	2.6517	1.00389	1.00885	1.11806	2.26029	2.29534	1.90672	1.09043	2.12938	5.12902e-07	2.84067e-05	6.28997	-0.637262	0.642932	0.000550474	0.00576761	0.474203	1.38915	0.00441594	0.0141514
ENSG00000104880	ARHGEF18	5.10947	5.00304	5.19198	5.77437	5.69032	5.55101	5.24242	5.32919	5.40152	5.76412	5.80365	5.77237	0.570884	1.48543	5.13385e-07	2.84067e-05	6.28956	0.223258	1.16737	0.00824493	0.0442766	0.678847	1.60086	4.11036e-08	1.19381e-06
ENSG00000031691	CENPQ	4.49834	4.82646	4.60261	3.82529	3.97013	3.86053	3.88445	4.14536	3.78546	3.26569	3.15353	3.11115	-0.75744	0.591545	5.23932e-07	2.88848e-05	6.28073	-0.704439	0.613681	1.30947e-06	5.01337e-05	-1.46556	0.362094	6.08094e-11	1.02437e-08
ENSG00000155189	AGPAT5	7.91747	7.86639	7.76186	7.40453	7.45726	7.38056	7.83275	7.91873	7.75258	7.40841	7.44701	7.53617	-0.434546	0.739927	5.3474e-07	2.93739e-05	6.27186	-0.0140325	0.990321	0.802836	0.917035	-0.38502	0.765768	2.52026e-06	3.11661e-05
ENSG00000185483	ROR1	2.91085	2.76208	3.18977	4.03484	3.95216	3.88275	2.58139	2.92153	3.01969	3.60831	3.70881	3.85085	1.00329	2.00457	5.47592e-07	2.99713e-05	6.26154	-0.112338	0.925088	0.430791	0.657769	0.768457	1.70345	1.84434e-05	0.000157356
ENSG00000129084	PSMA1	8.09235	8.22643	8.24	7.56529	7.63339	7.68326	8.17891	8.09485	8.06244	7.75377	7.72825	7.6196	-0.558967	0.678788	5.50194e-07	3.00054e-05	6.25948	-0.0741842	0.949879	0.312003	0.544405	-0.48547	0.714264	3.31208e-06	3.85967e-05
ENSG00000107902	LHPP	3.00547	3.11481	2.72813	3.97868	3.84621	3.79066	2.99397	3.02455	2.84477	4.03392	3.91417	3.75153	0.921896	1.8946	5.64291e-07	3.06638e-05	6.2485	0.00415704	1.00289	0.974194	1	0.950557	1.93262	3.49553e-07	6.3392e-06
ENSG00000150938	CRIM1	4.56614	4.37313	4.79629	5.5852	5.75276	5.57603	4.54423	4.6222	5.1115	5.54952	5.61607	5.6109	1.0603	2.08537	5.73103e-07	3.10315e-05	6.24177	0.181936	1.1344	0.223828	0.445336	1.01431	2.01993	1.03575e-06	1.51867e-05
ENSG00000156463	SH3RF2	3.433	3.52879	3.27527	4.10744	4.16239	4.14367	3.14862	3.33121	3.20699	3.77597	3.80725	3.57721	0.724976	1.65287	5.87959e-07	3.17226e-05	6.23065	-0.183866	0.880341	0.0835746	0.229128	0.308019	1.23801	0.00530326	0.0164121
ENSG00000013561	RNF14	6.01564	6.13905	6.07918	5.52932	5.67905	5.55746	6.21583	6.27005	6.18114	5.70591	5.73473	5.91168	-0.489375	0.712334	5.9427e-07	3.1839e-05	6.22602	0.144322	1.10521	0.0320252	0.11782	-0.294342	0.815444	0.000211769	0.00116514
ENSG00000160058	BSDC1	5.78135	5.83444	5.7957	5.01147	4.91193	5.26907	6.34395	6.32255	6.43908	5.65403	5.52238	5.79375	-0.740053	0.598717	5.94317e-07	3.1839e-05	6.22598	0.564704	1.47908	8.34496e-06	0.000222743	-0.147561	0.902775	0.130658	0.225
ENSG00000180573	HIST1H2AC	2.87368	2.72291	2.80999	4.04909	3.88632	4.05227	3.31023	3.59205	3.88538	4.51221	4.69014	5.03002	1.19373	2.28743	6.02661e-07	3.21723e-05	6.21993	0.794176	1.73409	0.000110011	0.00167122	1.94056	3.83854	2.56183e-10	2.77618e-08
ENSG00000165512	ZNF22	5.23884	5.32487	5.39429	4.58658	4.65652	4.81455	5.26378	5.30595	5.22401	4.71059	4.72305	4.94666	-0.633572	0.644578	6.09765e-07	3.24374e-05	6.21484	-0.0546289	0.962842	0.50206	0.716533	-0.526479	0.694247	5.84308e-06	6.1476e-05
ENSG00000116983	HPCAL4	2.48129	2.48645	2.45195	1.69645	1.75256	1.5389	2.43055	2.19192	2.21522	1.38895	1.82815	1.60714	-0.810549	0.570165	6.13874e-07	3.25418e-05	6.21192	-0.19417	0.874076	0.0756848	0.214158	-0.865353	0.548912	2.51879e-07	4.84611e-06
ENSG00000233559	AC016831.7	0.626901	0.756374	0.405491	1.63496	1.85634	1.83887	0.736871	1.02684	0.923904	2.11298	1.51141	1.76358	1.18016	2.26602	6.2343e-07	3.28445e-05	6.20521	0.299456	1.23068	0.074324	0.211773	1.1999	2.29724	4.81441e-07	8.17371e-06
ENSG00000111348	ARHGDIB	0.787114	0.69383	0.460019	1.78265	1.7426	1.66049	0.448924	0.40731	0.628124	1.41912	1.46129	0.846651	1.08151	2.11625	6.23918e-07	3.28445e-05	6.20487	-0.15232	0.899802	0.309197	0.541246	0.595906	1.51142	0.00063103	0.00282714
ENSG00000168758	SEMA4C	4.90638	4.84761	4.74659	4.30998	4.23536	4.054	5.14085	5.10741	5.03624	4.37106	4.37617	4.29811	-0.633644	0.644547	6.35506e-07	3.33388e-05	6.19688	0.261024	1.19833	0.00382933	0.0251218	-0.485052	0.714471	1.56649e-05	0.000137918
ENSG00000253848	RP11-10N23.5	-0.149821	0.187353	0.181432	0.993718	0.88264	0.995071	0.405184	0.431911	0.24072	1.15708	1.44102	1.0716	0.88418	1.84571	6.37887e-07	3.33483e-05	6.19526	0.286289	1.2195	0.0255402	0.100471	1.15048	2.21987	1.39333e-08	5.22877e-07
ENSG00000154553	PDLIM3	3.72079	3.77474	3.61359	2.92077	2.87008	3.2498	3.61626	3.46816	3.54949	2.81174	2.79984	2.90935	-0.690253	0.619745	6.56182e-07	3.41869e-05	6.18298	-0.158749	0.895802	0.0861714	0.234424	-0.863359	0.549671	3.2227e-08	1.00949e-06
ENSG00000075275	CELSR1	5.35577	5.208	5.35984	6.03359	5.99284	5.81331	5.52858	5.61505	5.74426	5.92303	6.04327	6.04375	0.639101	1.55736	6.90807e-07	3.58675e-05	6.16064	0.321731	1.24983	0.00150465	0.0123709	0.695481	1.61942	2.04748e-07	4.0684e-06
ENSG00000198015	MRPL42	7.15717	7.24021	7.27278	6.69341	6.7523	6.84372	7.1746	7.19317	7.05575	6.69341	6.75502	6.81796	-0.4603	0.726835	6.94123e-07	3.59167e-05	6.15856	-0.0822045	0.944613	0.186055	0.395122	-0.468088	0.722922	5.40512e-07	9.06493e-06
ENSG00000104341	LAPTM4B	8.49886	8.51235	8.54069	8.90151	8.93838	8.97474	8.56024	8.46538	8.52412	9.02007	9.03064	8.91856	0.420903	1.33877	7.08342e-07	3.65278e-05	6.14976	-0.000697108	0.999517	0.990243	1	0.472627	1.38763	1.38772e-07	2.95607e-06
ENSG00000197712	FAM114A1	4.97032	4.91036	4.9983	5.69163	5.59028	5.63264	5.14682	5.1591	5.29465	5.69874	5.50509	5.87303	0.678694	1.60069	7.42767e-07	3.80529e-05	6.12915	0.24076	1.18162	0.0177468	0.077316	0.732233	1.66121	2.48424e-07	4.79791e-06
ENSG00000182827	ACBD3	5.40314	5.40893	5.56357	6.00486	6.05619	6.06865	5.95724	5.96285	6.10516	6.29421	6.29092	6.53031	0.584894	1.49993	7.43591e-07	3.80529e-05	6.12867	0.550195	1.46428	1.7019e-06	6.12886e-05	0.91301	1.88297	9.28167e-10	7.44547e-08
ENSG00000138642	HERC6	3.51328	3.7647	3.41049	2.56513	2.78561	2.33069	3.50404	3.46816	3.31968	2.41735	2.26806	2.08061	-1.00261	0.499097	7.45447e-07	3.80529e-05	6.12758	-0.13294	0.911971	0.302408	0.533736	-1.30728	0.404082	2.27731e-08	7.68959e-07
ENSG00000165097	KDM1B	5.91846	5.84693	5.93147	5.11917	5.1927	5.18604	5.78952	5.87969	5.90692	4.99942	5.03418	5.1946	-0.732947	0.601674	7.47979e-07	3.8054e-05	6.12611	-0.0400982	0.972589	0.673523	0.840124	-0.823328	0.565137	1.5747e-07	3.2794e-06
ENSG00000181038	METTL23	3.97359	4.16328	4.02046	4.58138	4.63114	4.66627	3.99439	4.00847	3.96252	4.51921	4.57025	4.38772	0.573524	1.48815	7.54819e-07	3.82736e-05	6.12216	-0.0642105	0.956469	0.428789	0.656654	0.440227	1.35682	2.21671e-05	0.000181859
ENSG00000259976	RP11-553L6.5	1.76228	2.12834	2.0428	3.09689	3.25783	3.17232	1.93185	2.3181	2.11514	3.6174	3.63609	3.53023	1.19783	2.29395	7.60311e-07	3.84236e-05	6.11901	0.143965	1.10494	0.40436	0.63437	1.61708	3.06754	7.35419e-09	3.24119e-07
ENSG00000235194	PPP1R3E	-0.024336	0.187353	0.224994	1.01059	0.9588	1.13268	-0.0224334	-0.00679002	0.0343666	0.781086	0.34214	0.446682	0.904673	1.87212	8.02319e-07	4.04118e-05	6.09565	-0.127565	0.915375	0.313406	0.545866	0.394222	1.31423	0.00473814	0.0149718
ENSG00000165591	FAAH2	2.64057	2.5394	2.65882	1.95068	1.86439	1.80486	2.63025	2.66688	2.62494	2.06898	2.19455	2.48675	-0.739348	0.59901	8.38819e-07	4.19909e-05	6.07633	0.0279245	1.01954	0.771384	0.899791	-0.363719	0.777158	0.00151224	0.00586522
ENSG00000196141	SPATS2L	6.95977	6.99341	6.94984	7.31344	7.35052	7.4056	6.98766	7.00893	7.1205	7.37426	7.32956	7.33848	0.388746	1.30926	8.39209e-07	4.19909e-05	6.07613	0.0713645	1.05071	0.191893	0.403508	0.379754	1.30112	1.12497e-06	1.63368e-05
ENSG00000119408	NEK6	5.67293	5.70716	5.51056	6.36969	6.38328	6.28437	5.40431	5.32255	5.3676	6.30925	6.08023	6.01507	0.715353	1.64189	8.56158e-07	4.26981e-05	6.06745	-0.265701	0.831794	0.0166199	0.0738862	0.50485	1.41898	6.45154e-05	0.000437833
ENSG00000159131	GART	8.6422	8.659	8.70442	8.28933	8.32391	8.34581	8.52098	8.52412	8.53576	8.20187	8.16083	8.27481	-0.348837	0.785217	8.68659e-07	4.31795e-05	6.06115	-0.141537	0.906553	0.00719714	0.0400719	-0.456116	0.728946	2.06919e-08	7.04965e-07
ENSG00000188659	FAM154B	0.787114	0.420215	1.05013	1.85782	1.68224	1.89845	0.989023	0.942256	0.996713	2.06898	2.06972	2.41822	1.06062	2.08583	8.72417e-07	4.32005e-05	6.05928	0.223855	1.16785	0.141351	0.328583	1.43254	2.69921	9.48644e-09	4.02868e-07
ENSG00000166233	ARIH1	6.10252	5.99535	6.26003	6.61599	6.75844	6.71424	6.41046	6.41866	6.56542	6.81623	6.89246	6.96345	0.577203	1.49195	8.74781e-07	4.32005e-05	6.0581	0.345948	1.27099	0.000358842	0.00419652	0.771485	1.70703	1.27602e-08	4.94776e-07
ENSG00000079332	SAR1A	7.43006	7.4527	7.45591	7.04154	7.13931	7.09502	7.39841	7.42613	7.32709	7.15508	7.15587	7.20733	-0.354283	0.782258	9.00807e-07	4.43413e-05	6.04537	-0.0623699	0.95769	0.202422	0.417589	-0.27355	0.827281	2.14414e-05	0.000177055
ENSG00000125827	TMX4	3.77564	3.83346	3.78174	4.3917	4.37361	4.36683	3.51279	3.6425	3.42008	4.11293	4.09867	4.12894	0.58038	1.49524	9.55189e-07	4.67336e-05	6.01991	-0.271985	0.82818	0.00435223	0.02762	0.316418	1.24524	0.000937415	0.00394563
ENSG00000013619	MAMLD1	3.55545	3.41392	3.52042	4.18065	4.02835	4.07353	2.9885	2.92153	3.06806	3.29582	3.54018	3.31449	0.597821	1.51343	9.58317e-07	4.67336e-05	6.01849	-0.503689	0.705301	2.05064e-05	0.000436654	-0.112787	0.9248	0.19804	0.312375
ENSG00000162613	FUBP1	7.69069	7.69831	7.80939	7.17641	7.21648	7.28991	7.52447	7.53736	7.69728	6.89276	6.85621	6.95152	-0.505158	0.704583	9.58653e-07	4.67336e-05	6.01834	-0.146249	0.903597	0.0440217	0.147202	-0.832659	0.561494	8.12538e-10	6.84164e-08
ENSG00000111275	ALDH2	4.91153	5.02286	4.90721	5.58454	5.4113	5.49867	5.12895	5.16483	5.05778	5.8952	5.78803	5.75426	0.550844	1.46494	9.68036e-07	4.70397e-05	6.01411	0.169772	1.12488	0.0388134	0.135485	0.865382	1.82182	1.13052e-09	8.62182e-08
ENSG00000078369	GNB1	8.50404	8.47951	8.37063	8.83631	8.83524	8.78167	8.51505	8.47696	8.51505	8.76764	8.72927	8.63703	0.366269	1.28902	9.87657e-07	4.77497e-05	6.00539	0.0508513	1.03588	0.323014	0.555098	0.259984	1.19747	6.44098e-05	0.000437312
ENSG00000115866	DARS	6.44628	6.46845	6.53448	6.95309	7.00154	7.00739	6.48442	6.37611	6.22623	6.87925	6.89183	6.698	0.504335	1.41847	9.88946e-07	4.77497e-05	6.00483	-0.120831	0.919658	0.102303	0.263331	0.340432	1.26614	0.000113823	0.000698651
ENSG00000132664	POLR3F	4.7416	4.83949	4.81381	4.29284	4.30733	4.32607	4.73977	4.72455	4.68635	4.23136	4.36103	4.26998	-0.489594	0.712225	1.00275e-06	4.82624e-05	5.99881	-0.0814452	0.94511	0.223175	0.444601	-0.510853	0.701808	5.5286e-07	9.23118e-06
ENSG00000072501	SMC1A	7.41294	7.20099	7.2849	7.8927	7.9586	7.93447	7.05194	7.04901	7.02233	7.45801	7.5237	7.4421	0.629001	1.54649	1.03002e-06	4.9418e-05	5.98716	-0.258491	0.835962	0.00910314	0.0476235	0.175088	1.12903	0.058597	0.117714
ENSG00000101049	SGK2	0.913774	1.0264	0.986839	1.75138	1.6205	1.84992	1.25407	1.28324	1.39378	1.89501	1.9056	2.018	0.764832	1.69917	1.03507e-06	4.95038e-05	5.98503	0.334721	1.26113	0.0053335	0.0318728	0.963584	1.95015	3.63017e-08	1.09635e-06
ENSG00000144366	GULP1	6.33857	6.36615	6.496	5.74639	5.70704	5.86808	6.12778	6.26681	6.07778	5.51334	5.59456	5.75426	-0.626343	0.647816	1.05449e-06	5.00812e-05	5.97696	-0.242631	0.845203	0.00983489	0.0504421	-0.779854	0.582426	5.47147e-08	1.47603e-06
ENSG00000111581	NUP107	7.20527	7.27644	7.3347	6.71358	6.82543	6.90583	6.90233	6.90117	6.77623	6.46064	6.50134	6.34113	-0.457245	0.728376	1.05606e-06	5.00812e-05	5.97631	-0.412195	0.751479	3.93756e-06	0.000122331	-0.837399	0.559652	1.86537e-10	2.22356e-08
ENSG00000196116	TDRD7	4.01819	3.90393	4.06587	4.54754	4.5261	4.56003	4.18423	3.99283	4.20438	4.38841	4.58512	4.54131	0.548818	1.46289	1.06031e-06	5.00812e-05	5.97457	0.131467	1.09541	0.104282	0.267293	0.508906	1.42297	2.81106e-06	3.41897e-05
ENSG00000212724	KRTAP2-3	0.379983	0.447967	0.517257	1.52084	1.15093	1.42762	0.815646	0.919081	0.923904	1.63208	2.13841	1.79336	0.918106	1.88963	1.06059e-06	5.00812e-05	5.97445	0.437879	1.35461	0.00288787	0.0203922	1.40621	2.65039	1.85236e-09	1.22636e-07
ENSG00000197020	ZNF100	3.71706	3.75462	3.91756	4.53238	4.72135	4.61989	3.37586	3.64578	3.36808	4.00615	4.02796	4.04441	0.828442	1.77577	1.06739e-06	5.00812e-05	5.97167	-0.332845	0.793969	0.013951	0.0651604	0.230017	1.17285	0.0648544	0.127978
ENSG00000078114	NEBL	5.16697	5.13149	5.1425	5.72996	5.69448	5.62277	5.03816	4.97367	4.9616	5.30863	5.34705	5.22031	0.535514	1.44946	1.07035e-06	5.00812e-05	5.97048	-0.155886	0.897581	0.054647	0.171232	0.145282	1.10595	0.0662835	0.13021
ENSG00000101856	PGRMC1	6.4932	6.57451	6.54602	7.03389	7.08	7.0995	6.33579	6.28783	6.23312	7.05932	7.0995	6.96212	0.533162	1.4471	1.07491e-06	5.00812e-05	5.96863	-0.252389	0.839505	0.00362772	0.0241919	0.5026	1.41676	2.303e-06	2.89998e-05
ENSG00000111911	HINT3	4.27104	4.14813	4.29297	4.76045	4.84496	4.69737	4.61012	4.48317	4.61132	4.96377	5.06322	5.02079	0.53056	1.44449	1.07543e-06	5.00812e-05	5.96842	0.331078	1.25795	0.000290027	0.00356041	0.778701	1.71559	3.56631e-09	1.89715e-07
ENSG00000141934	PPAP2C	6.41432	6.47631	6.35065	7.1666	6.99304	7.09346	6.09935	5.89638	6.115	6.90311	6.81819	6.71566	0.670476	1.5916	1.07687e-06	5.00812e-05	5.96784	-0.37698	0.770048	0.00101227	0.00910621	0.398746	1.31836	0.000443331	0.00212701
ENSG00000145545	SRD5A1	4.41649	4.38658	4.3411	5.13405	5.04511	5.06118	4.01784	4.19934	3.90229	5.12637	4.98543	4.75779	0.698668	1.62301	1.08269e-06	5.01979e-05	5.96549	-0.341784	0.789065	0.00366407	0.0243431	0.576024	1.49074	1.2978e-05	0.000118673
ENSG00000174233	ADCY6	4.77897	4.7252	4.82023	3.75153	3.92308	4.20995	4.90859	4.86375	4.87901	4.09161	4.01932	4.32195	-0.813691	0.568924	1.09436e-06	5.05841e-05	5.96084	0.10913	1.07858	0.30845	0.540199	-0.631189	0.645644	2.08789e-05	0.00017383
ENSG00000197892	KIF13B	4.69462	4.58248	4.71175	3.73213	3.85969	3.91945	4.71463	4.9082	4.93602	3.91099	3.92921	4.19769	-0.825868	0.564143	1.10031e-06	5.07044e-05	5.95849	0.190336	1.14103	0.0870591	0.235655	-0.651077	0.636805	1.74595e-05	0.000150314
ENSG00000113615	SEC24A	5.1591	5.05166	5.26535	6.11217	6.1922	6.12659	5.20678	5.39695	5.42912	5.93396	6.03508	6.33484	0.985296	1.97972	1.10467e-06	5.07514e-05	5.95677	0.186035	1.13763	0.199121	0.413431	0.942107	1.92133	1.97934e-06	2.57145e-05
ENSG00000160014	CALM3	8.88355	8.8483	8.63941	8.20548	8.26847	8.12891	8.77861	8.72285	8.62545	8.27481	8.23719	7.96829	-0.589598	0.664528	1.11288e-06	5.08254e-05	5.95355	-0.0816851	0.944953	0.316754	0.548726	-0.63006	0.646149	4.55539e-07	7.85713e-06
ENSG00000062038	CDH3	7.75807	7.73092	7.69153	8.17006	8.06778	8.10365	7.91242	7.79836	7.94946	8.24515	8.13983	8.22884	0.386969	1.30764	1.11299e-06	5.08254e-05	5.95351	0.15988	1.11719	0.00787503	0.042879	0.4777	1.39252	5.7305e-08	1.51896e-06
ENSG00000169604	ANTXR1	5.17949	5.0913	5.17318	5.62007	5.51519	5.52845	5.29409	5.23931	5.32645	5.64801	5.64642	5.72136	0.406753	1.3257	1.12596e-06	5.12632e-05	5.94848	0.138763	1.10096	0.024584	0.0977751	0.523879	1.43782	2.98943e-08	9.56177e-07
ENSG00000198108	CHSY3	1.65338	1.73636	1.83367	2.40624	2.44491	2.53842	1.67345	1.67345	1.86504	1.96104	2.08351	2.14549	0.722017	1.64949	1.15737e-06	5.23365e-05	5.93653	-0.00364341	0.997478	0.972007	1	0.321932	1.25	0.00521497	0.0161981
ENSG00000086589	RBM22	6.51126	6.63222	6.5667	6.0843	6.16155	6.14534	6.67082	6.69341	6.70243	6.3325	6.32007	6.24807	-0.439749	0.737263	1.1589e-06	5.23365e-05	5.93595	0.118791	1.08582	0.0589183	0.180712	-0.269717	0.829482	0.000291976	0.00151235
ENSG00000156675	RAB11FIP1	6.00156	5.9767	5.99601	6.60632	6.66472	6.63047	5.95412	6.05474	6.18184	6.57162	6.52387	6.58058	0.642427	1.56095	1.15989e-06	5.23365e-05	5.93558	0.0722631	1.05136	0.433407	0.659875	0.567243	1.48169	5.78732e-06	6.09636e-05
ENSG00000147669	POLR2K	6.1935	6.39878	6.34189	5.62092	5.74126	5.77318	6.24893	6.1922	6.04398	5.8531	5.86724	5.75614	-0.599731	0.659877	1.19271e-06	5.36579e-05	5.92346	-0.149792	0.90138	0.0801088	0.222725	-0.485682	0.714159	1.5182e-05	0.000134291
ENSG00000080822	CLDND1	8.24161	8.28395	8.43974	7.6179	7.6806	7.84556	8.41596	8.40388	8.4517	7.78758	7.86214	8.17163	-0.607067	0.65653	1.21121e-06	5.43289e-05	5.91678	0.102243	1.07344	0.226491	0.447692	-0.381729	0.767517	0.000238397	0.00127987
ENSG00000173950	XXYLT1	2.95807	3.06032	2.6794	3.77859	3.96325	3.79138	2.91318	2.87593	2.51652	3.63097	3.74208	3.26047	0.944504	1.92453	1.21661e-06	5.441e-05	5.91485	-0.131667	0.912776	0.355934	0.586779	0.645905	1.56472	0.000130826	0.000782737
ENSG00000178921	PFAS	6.56386	6.4343	6.45167	5.98483	6.03444	5.96655	6.35535	6.27422	6.26664	5.75175	5.81878	5.57864	-0.487989	0.713018	1.22926e-06	5.48143e-05	5.91036	-0.184592	0.879898	0.0124852	0.0602828	-0.766452	0.587861	2.26797e-09	1.38648e-07
ENSG00000102554	KLF5	6.2215	6.02801	6.24508	6.66648	6.64093	6.64769	6.44683	6.51801	6.62253	6.75502	6.78894	6.7883	0.48708	1.40161	1.24452e-06	5.52851e-05	5.905	0.364572	1.2875	4.52557e-05	0.00081974	0.612741	1.52916	4.73607e-08	1.32724e-06
ENSG00000104361	NIPAL2	3.55047	3.53328	3.51328	4.19544	4.15806	4.13736	3.64785	3.78194	3.40797	4.1273	4.1638	4.07545	0.631293	1.54895	1.24711e-06	5.52851e-05	5.90409	0.0800064	1.05702	0.3866	0.615741	0.59	1.50525	2.97904e-06	3.55632e-05
ENSG00000204852	TCTN1	3.31427	3.17204	3.37069	3.88994	4.08789	3.91788	3.45245	3.17604	3.23082	3.96528	3.91788	3.77916	0.679948	1.60208	1.25372e-06	5.54158e-05	5.9018	0.000977036	1.00068	0.992146	1	0.6027	1.51856	5.99048e-06	6.25925e-05
ENSG00000188641	DPYD	1.78265	2.08879	2.20729	0.959656	1.09978	1.03544	1.84657	2.21725	2.21522	1.36207	1.49475	1.00462	-0.994362	0.501958	1.25827e-06	5.54551e-05	5.90023	0.0672178	1.04769	0.617742	0.801642	-0.73834	0.599428	4.3409e-05	0.000317474
ENSG00000169213	RAB3B	5.14599	4.95916	5.19902	5.87612	5.87666	5.8937	5.12637	5.20457	5.3275	5.65662	5.77221	5.85675	0.781101	1.71844	1.2727e-06	5.58373e-05	5.89527	0.118553	1.08565	0.300925	0.532375	0.660434	1.58056	1.09705e-05	0.000102923
ENSG00000196247	ZNF107	3.8643	3.79742	3.92976	4.57928	4.69552	4.72567	3.63736	3.68802	3.59302	3.99038	4.0436	4.32399	0.80309	1.74483	1.27635e-06	5.58373e-05	5.89403	-0.224152	0.856098	0.0752736	0.213352	0.254662	1.19306	0.0393645	0.0853067
ENSG00000182149	IST1	7.20597	7.20298	7.2771	6.80269	6.77726	6.85584	7.35368	7.34467	7.44434	6.99725	6.99578	7.09783	-0.41672	0.749126	1.27799e-06	5.58373e-05	5.89347	0.152331	1.11136	0.0147516	0.0678548	-0.198509	0.871451	0.00275084	0.0095985
ENSG00000215440	NPEPL1	3.48211	3.61569	3.39308	4.16432	4.09975	4.15782	3.53328	3.58303	3.65007	4.17823	4.30227	4.05584	0.643259	1.56185	1.33043e-06	5.78893e-05	5.87601	0.0915156	1.06549	0.334775	0.566361	0.681953	1.60431	5.69081e-07	9.44785e-06
ENSG00000139842	CUL4A	7.25679	7.24179	7.28162	6.86888	6.96676	6.90067	7.14244	7.15354	7.20772	6.79078	6.80831	6.8761	-0.347929	0.785711	1.33259e-06	5.78893e-05	5.8753	-0.0921002	0.938156	0.0698366	0.203262	-0.435129	0.739628	6.2869e-08	1.62378e-06
ENSG00000237441	RGL2	5.05536	5.2668	5.05967	4.67642	4.47074	4.60283	5.10229	5.02901	5.00848	4.60665	4.62283	4.48561	-0.544203	0.68577	1.34302e-06	5.81759e-05	5.87192	-0.081021	0.945388	0.282787	0.511066	-0.555456	0.680442	9.91005e-07	1.46832e-05
ENSG00000247556	OIP5-AS1	6.39104	6.42463	6.59444	7.03961	7.12136	7.15354	6.37711	6.51219	6.3128	6.98406	7.06428	7.21874	0.634962	1.5529	1.37458e-06	5.93731e-05	5.86183	-0.0691446	0.953203	0.455735	0.680262	0.618813	1.53561	1.89365e-06	2.4771e-05
ENSG00000101210	EEF1A2	8.46053	8.48849	8.30636	9.19857	8.96216	8.88048	8.54069	8.46859	8.48474	9.23303	9.23303	9.04574	0.595259	1.51074	1.41238e-06	6.08325e-05	5.85005	0.0793705	1.05656	0.357306	0.588052	0.752238	1.6844	5.21064e-08	1.42186e-06
ENSG00000139977	NAA30	5.83159	5.71117	5.74933	5.2694	5.37771	5.34852	5.90206	6.00524	5.93863	5.50362	5.55635	5.49759	-0.432196	0.741133	1.41897e-06	6.09435e-05	5.84803	0.18464	1.13653	0.00555199	0.0329563	-0.244779	0.843945	0.000691901	0.00306454
ENSG00000197165	SULT1A2	-0.19654	-0.145252	-0.175614	0.667461	0.518364	0.742691	-0.0424557	-0.329392	-0.236093	0.50103	0.38862	0.606984	0.815252	1.75961	1.43353e-06	6.13948e-05	5.84359	-0.0302118	0.979277	0.796049	0.914172	0.671205	1.5924	1.65404e-05	0.000143872
ENSG00000123268	ATF1	4.50435	4.54855	4.5804	5.01558	5.08702	5.09808	4.68595	4.77489	4.83781	5.13504	5.05599	5.2553	0.522469	1.43641	1.44117e-06	6.15479e-05	5.84129	0.221961	1.16632	0.00800116	0.0433234	0.604017	1.51994	1.83998e-07	3.74895e-06
ENSG00000149182	ARFGAP2	6.39556	6.39515	6.07081	5.55635	5.52832	5.42127	6.60632	6.45241	6.26251	5.75778	5.82925	5.64739	-0.785502	0.58015	1.45784e-06	6.19247e-05	5.83629	0.152651	1.11161	0.16272	0.360777	-0.542502	0.686579	9.93127e-05	0.000622439
ENSG00000125257	ABCC4	6.37892	6.34189	6.5093	6.91391	6.87857	6.95309	6.11432	6.15405	6.301	6.57112	6.60739	6.6922	0.505327	1.41945	1.45816e-06	6.19247e-05	5.8362	-0.219945	0.858598	0.00749105	0.0414647	0.213509	1.15951	0.00792201	0.0228566
ENSG00000069424	KCNAB2	2.62391	2.57096	2.84856	3.62281	3.55802	3.34532	2.67213	2.48645	2.84056	3.59363	3.62031	3.29737	0.828424	1.77574	1.47884e-06	6.26276e-05	5.83008	-0.0141417	0.990246	0.908797	0.976583	0.824144	1.77048	1.52906e-06	2.08284e-05
ENSG00000164086	DUSP7	5.13164	5.09362	4.95175	5.64529	5.59707	5.45768	5.06835	5.08702	5.1746	5.61015	5.68407	5.60495	0.507569	1.42165	1.48571e-06	6.27434e-05	5.82807	0.0507711	1.03582	0.493212	0.710971	0.573831	1.48847	2.65483e-07	5.06745e-06
ENSG00000112773	FAM46A	5.56062	5.52323	5.71363	4.81233	4.94965	5.01208	5.53383	5.79033	5.81528	5.01507	4.96391	5.09077	-0.674396	0.626595	1.49289e-06	6.27838e-05	5.82597	0.114385	1.08251	0.220731	0.441549	-0.575896	0.670869	9.69043e-06	9.29726e-05
ENSG00000147133	TAF1	5.86808	5.83606	6.04725	4.75583	4.7931	4.9495	5.84859	6.049	6.1312	4.81515	4.79224	5.10565	-1.08427	0.471629	1.49495e-06	6.27838e-05	5.82537	0.0928725	1.06649	0.520747	0.731179	-1.01339	0.495379	3.21209e-06	3.77508e-05
ENSG00000090447	TFAP4	4.3693	4.4103	4.40085	5.16848	5.12924	4.90685	3.95489	3.93695	4.27423	4.78541	4.85766	4.6249	0.675003	1.5966	1.51358e-06	6.33905e-05	5.82	-0.337896	0.791195	0.0036862	0.0244409	0.363071	1.28616	0.00143024	0.0055971
ENSG00000176834	VSIG10	5.63996	5.59456	5.63588	6.11048	6.11189	6.16136	5.38001	5.42386	5.27306	5.92376	5.83232	5.82889	0.504448	1.41858	1.5426e-06	6.44282e-05	5.81175	-0.264507	0.832483	0.00211383	0.0161613	0.238398	1.17968	0.00378089	0.012483
ENSG00000160867	FGFR4	5.24124	5.17025	5.1955	5.93863	5.80111	5.70319	5.16936	5.05516	5.08343	5.87763	5.91332	5.69163	0.612183	1.52857	1.55316e-06	6.4545e-05	5.80878	-0.099711	0.93322	0.277101	0.505917	0.625657	1.54291	1.12705e-06	1.63514e-05
ENSG00000132470	ITGB4	8.55694	8.40806	8.20957	9.46916	9.2419	8.95066	8.45551	8.38115	8.26847	9.14112	9.22451	9.04216	0.82909	1.77656	1.55392e-06	6.4545e-05	5.80857	-0.0234218	0.983896	0.846058	0.943006	0.744356	1.67523	6.19473e-06	6.44159e-05
ENSG00000168917	SLC35G2	2.19254	2.4167	2.20532	1.42329	1.63788	1.61615	2.52084	2.60848	2.63892	1.71586	1.66391	1.92236	-0.712756	0.610153	1.59765e-06	6.61804e-05	5.79652	0.317689	1.24633	0.00384256	0.0251325	-0.504846	0.704735	8.73129e-05	0.000560436
ENSG00000088205	DDX18	8.09617	8.1493	8.18402	7.64308	7.76401	7.75258	7.85738	7.92321	7.82665	7.51984	7.48517	7.42791	-0.423275	0.74573	1.63431e-06	6.75103e-05	5.78666	-0.274051	0.826994	0.0002333	0.00300515	-0.66534	0.63054	2.91047e-09	1.64648e-07
ENSG00000213246	SUPT4H1	6.8604	7.04312	6.83781	6.40738	6.42905	6.37321	7.02433	6.89903	6.89183	6.6871	6.63729	6.65024	-0.510723	0.70187	1.63867e-06	6.75103e-05	5.78551	0.024372	1.01704	0.732387	0.876235	-0.25572	0.837569	0.00212672	0.00774891
ENSG00000128487	SPECC1	4.78006	4.77913	4.65507	5.24942	5.13772	5.24909	4.70806	4.79287	4.83254	5.16026	5.09315	5.21674	0.473711	1.38868	1.64924e-06	6.77617e-05	5.78272	0.0395653	1.0278	0.570022	0.767823	0.418168	1.33623	8.00831e-06	7.91799e-05
ENSG00000181523	SGSH	3.30958	3.14425	3.13041	3.86124	3.70933	3.81524	3.53328	3.52956	3.57367	3.96978	4.09867	4.08011	0.60042	1.51616	1.66392e-06	6.81804e-05	5.77887	0.350676	1.27516	0.000757074	0.00727376	0.854413	1.80802	9.07185e-09	3.91836e-07
ENSG00000135069	PSAT1	7.43435	7.45351	7.43542	7.94227	8.03017	7.91418	7.71536	7.83378	7.4664	8.13487	8.16457	8.29502	0.521129	1.43508	1.67095e-06	6.82839e-05	5.77704	0.230645	1.17336	0.00622676	0.0360596	0.756814	1.68976	7.83243e-09	3.42212e-07
ENSG00000157570	TSPAN18	3.41096	3.35734	3.30193	3.97739	3.8874	3.92773	3.33483	3.4417	3.64115	3.85489	3.88723	3.77255	0.573993	1.48864	1.71939e-06	7.00745e-05	5.76462	0.115887	1.08364	0.182464	0.390284	0.481648	1.39634	1.57523e-05	0.000138367
ENSG00000122218	COPA	7.8601	7.82399	7.75627	7.31552	7.37731	7.31498	8.07183	8.08092	8.05607	7.57057	7.53617	7.64777	-0.477582	0.71818	1.8021e-06	7.32482e-05	5.74422	0.256072	1.19422	0.0011819	0.010181	-0.228831	0.853326	0.00322585	0.0109706
ENSG00000012124	CD22	0.821241	1.11031	0.697345	2.60195	2.20596	2.21768	0.64928	0.87	0.24072	2.29964	2.23434	1.63628	1.46566	2.7619	1.81522e-06	7.35844e-05	5.74107	-0.289949	0.817931	0.203165	0.418406	1.18189	2.26873	2.91359e-05	0.00022793
ENSG00000137842	TMEM62	4.17553	4.24197	3.97405	3.10882	3.46076	3.21134	3.94381	3.89509	3.72844	3.32268	3.11556	2.78195	-0.870751	0.546862	1.83169e-06	7.39852e-05	5.73715	-0.27542	0.82621	0.032203	0.118215	-1.05607	0.48094	1.55198e-07	3.24545e-06
ENSG00000080371	RAB21	6.22779	6.22747	6.22999	6.60961	6.63165	6.59857	6.42133	6.57191	6.52703	6.75257	6.75935	6.68767	0.38488	1.30575	1.8369e-06	7.39852e-05	5.73591	0.278388	1.21284	9.025e-05	0.00142085	0.504927	1.41905	3.97976e-08	1.16545e-06
ENSG00000100034	PPM1F	5.48254	5.38961	5.443	4.95846	4.97963	4.77558	5.44237	5.41187	5.49172	4.97559	5.03522	4.99072	-0.533539	0.690858	1.83975e-06	7.39852e-05	5.73524	0.0103499	1.0072	0.889292	0.966977	-0.437817	0.738251	1.89028e-05	0.000160258
ENSG00000171603	CLSTN1	7.63146	7.57145	7.42342	8.02832	7.93849	7.91042	7.65641	7.64157	7.78011	8.06968	8.02885	7.96282	0.416861	1.33502	1.85786e-06	7.4422e-05	5.73099	0.150463	1.10993	0.0218027	0.089556	0.47832	1.39312	2.81516e-07	5.3146e-06
ENSG00000151224	MAT1A	1.18143	1.22765	0.957764	-0.000651878	0.127036	0.162989	1.03914	0.87	1.01265	0.126572	-0.349535	-0.167407	-1.02605	0.491053	1.86169e-06	7.4422e-05	5.73009	-0.148534	0.902167	0.313595	0.545874	-1.25245	0.419734	1.30326e-07	2.82037e-06
ENSG00000103067	ESRP2	5.57503	5.51925	5.44466	6.09341	6.06298	6.05741	5.95814	5.95896	6.1405	6.43798	6.37811	6.479	0.55817	1.4724	1.86984e-06	7.4422e-05	5.7282	0.506165	1.42027	6.63205e-06	0.000187241	0.91845	1.89008	1.1864e-09	8.86061e-08
ENSG00000101265	RASSF2	3.92758	3.69981	3.93377	3.0725	3.10412	3.3097	3.73705	3.63493	3.85599	2.96835	2.82925	3.11115	-0.691538	0.619193	1.87024e-06	7.4422e-05	5.7281	-0.110584	0.926213	0.256477	0.483457	-0.884336	0.541737	7.50974e-08	1.88477e-06
ENSG00000147642	SYBU	4.20053	4.24197	4.1719	3.55993	3.59422	3.57603	4.11374	3.95662	4.30643	3.62065	3.52879	3.79771	-0.628211	0.646978	1.89041e-06	7.50275e-05	5.72344	-0.0791696	0.946602	0.369008	0.598384	-0.556559	0.679922	7.78066e-06	7.74541e-05
ENSG00000230844	ZNF674-AS1	2.32799	2.45106	2.55337	1.58886	1.80911	1.41912	2.45569	2.5731	2.50286	1.78087	1.79805	1.65849	-0.838071	0.559391	1.91038e-06	7.56221e-05	5.71888	0.0666593	1.04729	0.566243	0.764998	-0.697855	0.616488	1.69729e-05	0.000146624
ENSG00000116497	S100PBP	4.7731	4.70562	4.84704	5.33214	5.45534	5.43236	4.53579	4.58963	4.50261	5.06549	5.074	5.11697	0.631535	1.54921	1.92827e-06	7.59733e-05	5.71483	-0.232359	0.851242	0.0249455	0.0988754	0.310339	1.24	0.00333639	0.0112822
ENSG00000170779	CDCA4	5.98555	6.11712	5.84764	5.24942	5.30723	4.99942	5.46919	5.44763	5.13973	4.75473	4.89493	4.45562	-0.798096	0.575108	1.92927e-06	7.59733e-05	5.71461	-0.63177	0.645384	2.96736e-05	0.000597452	-1.28093	0.411531	3.63528e-09	1.92708e-07
ENSG00000079785	DDX1	8.33638	8.33748	8.33529	7.97355	8.03979	8.00923	8.24161	8.24902	8.16801	7.93447	7.9462	7.90927	-0.328873	0.796158	1.93456e-06	7.59842e-05	5.71342	-0.116864	0.92219	0.0222173	0.0907915	-0.406362	0.754524	1.11012e-07	2.49757e-06
ENSG00000185787	MORF4L1	8.27046	8.37359	8.40388	8.65552	8.669	8.7431	8.24902	8.28395	8.23719	8.56267	8.58862	8.63941	0.339899	1.26567	1.98059e-06	7.75911e-05	5.70321	-0.0925438	0.937868	0.0764362	0.21548	0.247542	1.18718	8.61942e-05	0.0005549
ENSG00000259049	RP11-589M4.1	1.66517	1.87688	1.45002	2.60391	2.50254	2.61184	1.90465	1.85168	2.06793	2.77704	2.72827	2.56906	0.908348	1.8769	2.01285e-06	7.85512e-05	5.69619	0.277132	1.21178	0.0539776	0.169959	1.02768	2.03874	3.4377e-07	6.2794e-06
ENSG00000170190	SLC16A5	3.52879	3.439	3.36962	4.19914	4.0732	4.11668	3.52143	3.66258	3.5646	4.00312	4.12989	3.92142	0.683749	1.60631	2.01546e-06	7.85512e-05	5.69563	0.136896	1.09954	0.19343	0.40567	0.572548	1.48715	1.88977e-05	0.000160258
ENSG00000159322	ADPGK	5.87005	5.89129	5.88141	5.39835	5.42984	5.51012	5.85974	5.78087	5.804	5.41852	5.38874	5.58737	-0.434931	0.739729	2.05075e-06	7.97214e-05	5.68809	-0.0660737	0.955234	0.294042	0.524344	-0.416495	0.749243	3.40863e-06	3.95396e-05
ENSG00000168283	BMI1	6.63551	6.66806	6.64728	6.19198	6.24149	6.32007	6.49032	6.50109	6.49049	5.99583	6.02769	6.15707	-0.399224	0.758266	2.12067e-06	8.2229e-05	5.67353	-0.156333	0.897303	0.0132543	0.0629177	-0.590442	0.664139	9.82535e-09	4.11498e-07
ENSG00000167693	NXN	6.63165	6.63889	6.52387	7.20421	7.13549	7.00814	6.75806	6.7002	6.81516	7.26306	7.27028	7.08577	0.517798	1.43177	2.15533e-06	8.33596e-05	5.66649	0.159548	1.11694	0.0491864	0.158764	0.608407	1.52458	2.32472e-07	4.53605e-06
ENSG00000175745	NR2F1	5.04129	4.97559	5.16012	5.63332	5.58469	5.4678	4.80355	4.76178	4.95555	5.45977	5.39482	5.30233	0.503407	1.41756	2.17978e-06	8.40908e-05	5.66159	-0.218281	0.859589	0.00991407	0.0506767	0.32732	1.25468	0.000310063	0.00159057
ENSG00000162627	SNX7	5.29978	5.33373	5.24529	4.63782	4.75059	4.74386	5.04486	5.23508	4.98138	4.73585	4.69496	4.62009	-0.582415	0.667845	2.23695e-06	8.60473e-05	5.65034	-0.206023	0.866924	0.0219985	0.0902136	-0.6091	0.655606	1.22395e-06	1.75889e-05
ENSG00000140740	UQCRC2	7.88198	7.93924	7.89473	7.45351	7.51933	7.51838	8.01586	7.92205	7.82779	7.57259	7.60188	7.5463	-0.408308	0.753507	2.24185e-06	8.60473e-05	5.64939	0.0164936	1.0115	0.779374	0.903785	-0.331704	0.794598	2.68569e-05	0.000213518
ENSG00000113719	ERGIC1	6.80764	6.76046	6.63165	7.16957	7.1184	7.17703	6.74145	6.58007	6.73803	7.22667	7.12382	7.14378	0.421543	1.33936	2.27877e-06	8.72436e-05	5.6423	-0.0469113	0.968007	0.458927	0.682279	0.43142	1.34856	1.64333e-06	2.20678e-05
ENSG00000013374	NUB1	5.16953	5.18703	5.32242	5.61244	5.71807	5.72815	5.18756	5.14734	5.28148	5.70716	5.79113	5.70554	0.460063	1.3756	2.29826e-06	8.77681e-05	5.6386	-0.0205543	0.985854	0.7661	0.897038	0.508595	1.42266	5.78097e-07	9.55782e-06
ENSG00000018510	AGPS	6.66547	6.54257	6.63832	7.13152	7.19691	7.17286	6.51008	6.496	6.61628	6.91359	6.93992	6.93287	0.551712	1.46582	2.30511e-06	8.78085e-05	5.63731	-0.0745327	0.94965	0.37389	0.602327	0.313403	1.24264	0.00111088	0.00453229
ENSG00000164941	INTS8	7.14244	7.12599	7.18826	6.70633	6.78567	6.82696	6.99578	7.00247	6.98622	6.63551	6.68564	6.68658	-0.379256	0.768834	2.35244e-06	8.93868e-05	5.62848	-0.157342	0.896676	0.00993307	0.0507568	-0.482992	0.715492	9.15696e-08	2.19319e-06
ENSG00000213625	LEPROT	5.01902	5.04408	5.02941	5.45827	5.45192	5.55194	4.93495	5.01221	4.95265	5.48343	5.48014	5.50912	0.456422	1.37213	2.36747e-06	8.9733e-05	5.62572	-0.0642461	0.956445	0.357274	0.588052	0.459979	1.37552	2.07459e-06	2.66775e-05
ENSG00000140320	BAHD1	6.20659	6.08476	6.11712	5.73457	5.69522	5.68133	6.10516	6.14172	6.22326	5.8452	5.78307	5.74703	-0.432403	0.741027	2.40437e-06	9.09045e-05	5.619	0.0206157	1.01439	0.740649	0.881811	-0.344201	0.787744	3.50829e-05	0.000265386
ENSG00000221944	TIGD1	2.64926	3.02418	2.8378	1.59471	1.80686	1.60604	2.4638	2.41401	2.78175	1.45366	0.878132	1.64028	-1.16803	0.445028	2.41482e-06	9.09728e-05	5.61711	-0.283871	0.821384	0.0963386	0.25261	-1.51367	0.350219	8.09493e-08	2.00208e-06
ENSG00000180694	TMEM64	6.71358	6.6777	6.73307	6.18837	6.17676	6.2778	6.95798	6.9748	6.97298	6.63832	6.64769	6.83241	-0.493828	0.710138	2.41818e-06	9.09728e-05	5.61651	0.260538	1.19793	0.00152524	0.0125131	-0.00231278	0.998398	0.973957	0.998819
ENSG00000162512	SDC3	5.90398	5.88338	5.77054	6.36391	6.23544	6.26715	5.72136	5.57568	5.69209	5.93969	5.88471	5.85171	0.43609	1.35293	2.43634e-06	9.14292e-05	5.61326	-0.189759	0.876752	0.00948571	0.0491156	0.0394045	1.02769	0.547097	0.677105
ENSG00000139636	LMBR1L	4.27512	4.59622	4.40085	3.80413	3.68282	3.74146	4.62237	4.63696	4.47292	4.26595	4.14318	4.27557	-0.681462	0.623533	2.44889e-06	9.16732e-05	5.61103	0.152996	1.11188	0.118672	0.29007	-0.196225	0.872832	0.0543981	0.11109
ENSG00000146083	RNF44	5.60705	5.50101	5.59954	5.06904	4.94965	5.11107	5.76259	5.70618	5.87612	5.23248	5.32147	5.42295	-0.52593	0.694511	2.45834e-06	9.18002e-05	5.60936	0.2126	1.15877	0.00987054	0.0505565	-0.243894	0.844463	0.00455353	0.0145125
ENSG00000119139	TJP2	5.99085	5.99968	5.90027	5.52969	5.48907	5.54159	5.82044	5.84475	5.93183	5.39902	5.40225	5.34494	-0.443642	0.735276	2.46722e-06	9.19056e-05	5.60779	-0.0980099	0.934321	0.139565	0.325489	-0.58152	0.66826	6.62998e-08	1.69221e-06
ENSG00000100764	PSMC1	8.16718	8.27234	8.22643	7.79353	7.85172	7.87042	8.19724	8.12891	8.11002	7.86639	7.82077	7.7815	-0.383484	0.766584	2.48565e-06	9.23649e-05	5.60456	-0.0766374	0.948265	0.182089	0.389813	-0.399003	0.758382	1.46574e-06	2.02613e-05
ENSG00000197971	MBP	5.85365	5.71861	5.78114	6.22908	6.29818	6.28551	5.91813	5.99859	6.00656	6.29574	6.30821	6.39151	0.486465	1.40101	2.50315e-06	9.27878e-05	5.60151	0.190036	1.14079	0.0165347	0.0736869	0.547193	1.46124	4.98534e-07	8.40742e-06
ENSG00000074590	NUAK1	3.7062	3.59079	3.68282	4.28917	4.37209	4.27127	4.0961	4.28892	4.3841	4.55105	4.64161	4.56289	0.651092	1.57036	2.53005e-06	9.35563e-05	5.59687	0.596762	1.51232	7.87266e-06	0.000214672	0.925424	1.89924	1.4814e-08	5.49132e-07
ENSG00000112977	DAP	7.18905	7.15543	6.99506	7.62817	7.53912	7.59371	7.25439	7.22895	7.21101	7.76443	7.70624	7.65524	0.473624	1.38859	2.56591e-06	9.46515e-05	5.59076	0.118051	1.08527	0.108594	0.27472	0.595403	1.51089	1.08482e-07	2.45477e-06
ENSG00000065559	MAP2K4	6.6332	6.62184	6.60889	6.94205	7.00739	7.01515	6.82406	6.8707	6.80855	6.98548	7.01856	7.15791	0.36682	1.28951	2.65976e-06	9.78753e-05	5.57516	0.213094	1.15917	0.00100091	0.00904875	0.432336	1.34942	2.81788e-07	5.3146e-06
ENSG00000173083	HPSE	4.13601	4.00266	4.16208	3.43076	3.66789	3.56815	3.89588	3.7926	3.84233	3.20073	3.27265	3.38791	-0.544486	0.685636	2.71354e-06	9.96125e-05	5.56646	-0.256412	0.837168	0.00427834	0.0272225	-0.813444	0.569022	1.29643e-08	5.00132e-07
ENSG00000170456	DENND5B	4.36142	4.19061	4.49597	5.32037	5.28733	5.33903	3.71035	4.06975	4.29975	4.58219	4.59412	4.7978	0.966758	1.95444	2.72619e-06	9.9677e-05	5.56444	-0.321784	0.80008	0.0504334	0.161877	0.308565	1.23848	0.0496665	0.10315
ENSG00000257073	AC011933.1	3.26942	3.34867	2.79611	4.20643	4.17416	4.22386	3.73334	3.51231	3.50868	4.50922	4.12579	4.15481	1.0623	2.08826	2.72844e-06	9.9677e-05	5.56408	0.445491	1.36178	0.0132417	0.0628938	1.12496	2.18096	1.19344e-06	1.71993e-05
ENSG00000142156	COL6A1	5.59172	5.55635	5.55841	6.3885	6.25049	5.96437	5.69593	5.77036	5.62301	6.3808	6.55826	6.34486	0.632635	1.55039	2.74553e-06	0.00010006	5.56137	0.127557	1.09244	0.195063	0.407629	0.859324	1.81419	3.54776e-08	1.08007e-06
ENSG00000049239	H6PD	3.09873	2.98285	2.85425	3.83948	3.75686	3.65111	3.28815	3.38725	3.14029	3.72719	3.50771	3.64208	0.770465	1.70582	2.76089e-06	0.000100379	5.55895	0.292867	1.22507	0.0218739	0.0897996	0.646825	1.56572	2.45635e-05	0.000198512
ENSG00000134013	LOXL2	4.19154	4.04399	3.84303	4.74128	4.64295	4.59265	3.74233	3.74494	3.52222	4.59474	4.52979	4.42852	0.632436	1.55018	2.79877e-06	0.000101512	5.55303	-0.357015	0.780779	0.0021413	0.0162728	0.491489	1.4059	5.98766e-05	0.000411883
ENSG00000114859	CLCN2	3.52334	3.71176	3.52042	4.20406	4.19651	4.15782	3.44019	3.20858	3.33262	3.74803	3.71457	3.5636	0.600711	1.51646	2.83294e-06	0.000102506	5.54776	-0.258405	0.836012	0.0129967	0.0620866	0.0905146	1.06475	0.332429	0.466878
ENSG00000149564	ESAM	2.52674	2.47421	2.51356	1.70584	1.66498	1.37325	2.0098	2.06245	2.13841	1.27242	0.946446	0.695658	-0.923257	0.527317	2.93738e-06	0.000105792	5.53204	-0.434503	0.739949	0.00449393	0.028259	-1.53275	0.345619	2.87845e-09	1.64061e-07
ENSG00000132613	MTSS1L	5.62748	5.53484	5.53835	6.21349	6.11455	6.01441	5.32974	5.28205	5.47167	5.93088	6.0921	5.82432	0.547384	1.46143	2.9377e-06	0.000105792	5.53199	-0.205684	0.867128	0.0244706	0.0976311	0.382516	1.30361	0.000189147	0.00105716
ENSG00000109686	SH3D19	3.51328	3.46451	3.66821	4.24228	4.38966	4.40277	3.41537	3.74009	3.61812	4.22492	4.02046	4.26791	0.796473	1.73685	2.97369e-06	0.000106802	5.5267	0.0430407	1.03028	0.730747	0.875038	0.622493	1.53953	6.0629e-05	0.000416303
ENSG00000167755	KLK6	5.62603	5.75345	5.15659	6.66472	6.53948	6.36952	5.69163	5.7679	5.52932	6.81127	6.6835	6.28122	1.01186	2.01651	2.97983e-06	0.000106802	5.52581	0.149919	1.10951	0.345345	0.576506	1.0801	2.11419	1.20628e-06	1.73514e-05
ENSG00000164855	TMEM184A	3.07472	2.862	3.09523	3.83162	3.67385	3.52727	2.9588	3.07123	3.22147	3.82212	3.86083	3.88559	0.667653	1.58849	3.0052e-06	0.000107457	5.52213	0.0737168	1.05242	0.480182	0.701353	0.845712	1.79715	1.02866e-07	2.37738e-06
ENSG00000171617	ENC1	6.05074	6.0391	6.08875	6.5601	6.59403	6.48886	6.53448	6.58798	6.55986	6.75133	6.84799	6.85986	0.488269	1.40276	3.0511e-06	0.000108842	5.51554	0.501313	1.4155	2.16279e-06	7.57277e-05	0.760095	1.6936	5.2216e-09	2.49731e-07
ENSG00000186625	KATNA1	4.84605	5.01457	4.99347	4.37395	4.26409	4.44134	4.75321	4.91389	4.87597	4.3272	4.27423	4.30253	-0.591665	0.663577	3.07504e-06	0.000109438	5.51215	-0.103569	0.930728	0.236554	0.460581	-0.649973	0.637292	9.13025e-07	1.37735e-05
ENSG00000132313	MRPL35	6.29818	6.3488	6.32238	5.94693	5.98116	5.91523	6.19277	6.14384	6.13196	5.93969	5.86448	5.81605	-0.375324	0.770932	3.09973e-06	0.000110059	5.50868	-0.166972	0.89071	0.00730701	0.0405496	-0.449497	0.732298	2.87826e-07	5.40048e-06
ENSG00000125648	SLC25A23	6.3796	6.43203	6.18766	5.85438	5.85866	5.75231	6.50252	6.37892	6.5886	6.14578	6.10075	6.02508	-0.511534	0.701476	3.11475e-06	0.000110334	5.50658	0.156651	1.1147	0.0472914	0.154623	-0.242633	0.845201	0.00457414	0.014569
ENSG00000162073	PAQR4	4.68915	4.68297	4.45357	5.32713	5.18294	5.17562	3.83202	3.87074	3.8128	4.60963	4.55922	4.37497	0.619651	1.5365	3.22985e-06	0.000113937	5.49082	-0.770535	0.5862	6.18557e-07	2.79938e-05	-0.0936982	0.937117	0.34014	0.475112
ENSG00000013375	PGM3	5.68989	5.74639	5.81266	6.20155	6.2874	6.21299	5.94172	6.01211	5.90769	6.29236	6.31478	6.57742	0.484461	1.39906	3.23454e-06	0.000113937	5.49019	0.204291	1.15212	0.0119169	0.0581125	0.644722	1.56344	5.95166e-08	1.56072e-06
ENSG00000165476	REEP3	6.35238	6.3678	6.42527	5.98309	5.8985	6.04506	6.25506	6.38352	6.23104	5.84801	5.94237	5.98782	-0.406262	0.754576	3.23903e-06	0.000113937	5.48958	-0.0918766	0.938301	0.139783	0.325631	-0.455921	0.729044	7.18732e-07	1.14461e-05
ENSG00000088367	EPB41L1	5.72163	5.5825	5.56161	6.16628	6.05266	6.18098	5.44858	5.42386	5.55933	5.98797	5.76347	5.70682	0.51127	1.4253	3.25044e-06	0.000114024	5.48806	-0.144674	0.904584	0.0812666	0.224792	0.197919	1.14704	0.0192813	0.047509
ENSG00000124783	SSR1	7.30319	7.31435	7.40764	7.8028	7.81243	7.80794	7.64308	7.76695	7.70927	7.98148	8.0209	8.23719	0.466102	1.38137	3.25746e-06	0.000114024	5.48712	0.364833	1.28773	6.14705e-05	0.00103897	0.737863	1.6677	4.59297e-09	2.29059e-07
ENSG00000167601	AXL	5.00145	5.05888	4.66253	6.03983	5.96273	5.751	5.57864	5.78295	5.26519	6.32566	6.34277	6.05704	1.00974	2.01355	3.27048e-06	0.000114024	5.48539	0.633716	1.55156	0.000638084	0.00637706	1.33406	2.52111	6.1476e-08	1.60144e-06
ENSG00000157617	C2CD2	5.594	5.6772	5.66875	6.22326	6.03666	6.22763	5.62209	5.66888	5.739	6.11599	6.12689	6.3135	0.515833	1.42982	3.27157e-06	0.000114024	5.48524	0.0300787	1.02107	0.705091	0.85973	0.5384	1.45236	1.81615e-06	2.39432e-05
ENSG00000167106	FAM102A	4.71133	4.6364	4.48455	5.32242	5.14754	5.06673	4.71839	4.73197	4.67246	5.35085	5.32487	5.15847	0.568037	1.48251	3.28063e-06	0.000114077	5.48404	0.0964696	1.06915	0.280722	0.509333	0.66747	1.58828	3.5214e-07	6.37849e-06
ENSG00000152380	FAM151B	0.534067	0.603195	0.475805	-0.201285	-0.337396	-0.316477	0.331165	-0.0706116	0.119056	-0.173167	-0.252896	-0.0370583	-0.822784	0.56535	3.307e-06	0.000114601	5.48057	-0.411246	0.751973	0.00343951	0.0232071	-0.69225	0.618888	2.59049e-05	0.000207034
ENSG00000137693	YAP1	7.87785	7.71085	7.92205	8.43528	8.40388	8.46285	8.03535	8.1493	8.19124	8.27847	8.32034	8.56267	0.597228	1.51281	3.31081e-06	0.000114601	5.48007	0.288593	1.22145	0.00491348	0.0300124	0.55001	1.4641	9.19977e-06	8.91802e-05
ENSG00000185630	PBX1	3.51328	3.45325	3.68282	4.16432	4.26409	4.44506	3.27629	3.3778	3.50404	3.89428	3.88179	3.99803	0.74147	1.67188	3.36033e-06	0.00011605	5.47362	-0.16314	0.893079	0.180663	0.38791	0.374996	1.29684	0.00387005	0.0127122
ENSG00000248161	RP11-499E18.1	1.03757	0.997225	1.06108	2.15155	1.90138	1.65692	0.778861	0.668704	0.338118	1.31866	1.56937	1.5681	0.871762	1.8299	3.38245e-06	0.000116548	5.47077	-0.436784	0.738779	0.00457231	0.0285859	0.453216	1.36909	0.00299312	0.0102907
ENSG00000106025	TSPAN12	3.90505	3.83346	4.19099	2.98918	2.98285	3.25547	3.99439	4.01078	4.26321	3.17275	3.14563	3.61452	-0.9003	0.535775	3.39702e-06	0.000116785	5.4689	0.113872	1.08213	0.373311	0.602139	-0.666318	0.630113	8.99343e-05	0.000574829
ENSG00000151806	GUF1	5.17424	5.06776	4.96677	5.57815	5.60034	5.55246	5.08204	5.06118	4.97963	5.61897	5.70659	5.46263	0.507192	1.42128	3.46894e-06	0.000118988	5.4598	-0.028941	0.98014	0.714264	0.866377	0.526682	1.44061	2.0568e-06	2.65389e-05
ENSG00000107560	RAB11FIP2	4.27512	4.02645	4.22492	5.13675	5.18146	5.14204	4.41634	4.54346	4.57226	4.95039	5.15424	5.37641	0.978216	1.97003	3.47842e-06	0.000119044	5.45862	0.335574	1.26188	0.0402466	0.138709	0.984096	1.97807	3.11213e-06	3.68195e-05
ENSG00000167552	TUBA1A	7.61346	7.77889	7.47636	6.97905	6.86944	7.10159	8.04149	7.93849	8.03246	7.32138	7.22709	7.47545	-0.639942	0.641739	3.48985e-06	0.000119166	5.45719	0.38097	1.30222	0.000673	0.00659605	-0.282182	0.822346	0.00789781	0.0227987
ENSG00000176401	EID2B	0.712698	0.888176	0.625365	-0.0985542	0.000558265	-0.19654	1.28731	1.58175	1.19995	0.739774	0.992644	0.890051	-0.840358	0.558505	3.56443e-06	0.000121439	5.44801	0.614086	1.53059	9.80197e-05	0.00151332	0.131853	1.0957	0.298682	0.43004
ENSG00000146373	RNF217	4.03592	3.73929	4.50954	5.04408	5.08917	5.20104	3.94542	4.29159	4.17943	4.84358	4.89708	5.11389	1.01781	2.02484	3.57915e-06	0.000121667	5.44622	0.0454987	1.03204	0.78109	0.904737	0.857296	1.81164	3.03025e-05	0.000235477
ENSG00000108784	NAGLU	2.72373	2.6756	2.63059	3.5641	3.26279	3.36568	2.73307	2.90062	2.78513	3.19456	3.45753	3.32532	0.720937	1.64825	3.61039e-06	0.000122454	5.44245	0.129548	1.09395	0.262175	0.489202	0.648865	1.56793	1.33991e-05	0.000121716
ENSG00000116957	TBCE	5.54138	5.59869	5.45318	4.89983	4.9365	5.04692	5.35765	5.37712	5.35942	4.97846	5.0637	4.82226	-0.570377	0.673441	3.68095e-06	0.000124569	5.43404	-0.166563	0.890963	0.0617044	0.186466	-0.57594	0.670849	3.14403e-06	3.70946e-05
ENSG00000154127	UBASH3B	5.99471	5.9294	6.04421	6.44703	6.46109	6.46064	6.40261	6.53521	6.52422	6.56767	6.66099	6.68998	0.466943	1.38218	3.71751e-06	0.000125526	5.42975	0.498092	1.41234	1.5968e-06	5.8476e-05	0.650041	1.56921	3.60123e-08	1.08978e-06
ENSG00000174749	C4orf32	5.37532	5.45894	5.4117	4.72488	4.83845	4.95472	5.41798	5.62589	5.36317	4.82106	4.96191	5.0637	-0.57627	0.670695	3.73195e-06	0.000125734	5.42806	0.0536015	1.03785	0.527784	0.735784	-0.467092	0.723421	4.04833e-05	0.000298815
ENSG00000106683	LIMK1	6.64874	6.56386	6.4438	7.20597	7.07067	6.94064	6.50491	6.49049	6.57882	7.1234	7.0927	6.91155	0.520288	1.43424	3.74773e-06	0.000125985	5.42623	-0.0275407	0.981091	0.734013	0.877477	0.490622	1.40505	7.70943e-06	7.69978e-05
ENSG00000014914	MTMR11	2.27876	2.13622	2.13679	1.38581	1.28569	1.31103	2.25939	2.0693	2.13841	1.70793	1.14268	1.69112	-0.856442	0.552313	3.79671e-06	0.000127349	5.42059	-0.0283315	0.980554	0.822721	0.928949	-0.670252	0.628397	6.32495e-05	0.000430978
ENSG00000170946	DNAJC24	3.99253	4.07133	4.14749	3.11346	3.31369	3.35522	4.05556	4.11293	4.00847	3.26569	3.41968	3.75312	-0.809716	0.570494	3.85867e-06	0.000129142	5.41356	-0.0113026	0.992196	0.92276	0.984427	-0.592249	0.663308	0.00011464	0.000703382
ENSG00000143952	VPS54	5.84383	5.83078	5.79843	5.28252	5.28554	5.4191	5.81528	5.84181	5.74703	5.13898	5.28789	5.30177	-0.495495	0.709318	3.88512e-06	0.000129741	5.4106	-0.0230589	0.984144	0.754901	0.890111	-0.581846	0.668108	4.87279e-07	8.26357e-06
ENSG00000102081	FMR1	5.04772	4.87759	5.27835	5.63292	5.72906	5.84892	4.95916	4.98942	5.13269	5.52915	5.48487	5.70682	0.669568	1.5906	3.91229e-06	0.000130361	5.40757	-0.040015	0.972645	0.706372	0.860462	0.505929	1.42004	0.00010693	0.000661604
ENSG00000266469	CTB-131K11.1	2.8783	2.83753	3.00345	3.50215	3.43463	3.41356	3.04424	2.96009	3.08203	3.35849	3.41537	3.29316	0.544083	1.45809	3.93586e-06	0.000130859	5.40496	0.122697	1.08877	0.162581	0.36066	0.449822	1.36587	3.94192e-05	0.000292242
ENSG00000129474	AJUBA	5.05643	4.96482	4.99456	5.46902	5.54398	5.37119	5.47932	5.47644	5.62984	5.87763	5.94487	5.93538	0.456271	1.37199	3.95194e-06	0.000131106	5.40319	0.523361	1.4373	6.33531e-07	2.85014e-05	0.913956	1.88421	1.26225e-10	1.64973e-08
ENSG00000116752	BCAS2	6.20106	6.39914	6.32031	5.69726	5.8256	5.8899	6.21583	6.20636	6.12151	5.77812	5.77737	5.82889	-0.502777	0.705747	3.99316e-06	0.000132184	5.39868	-0.125693	0.916564	0.109322	0.275484	-0.512203	0.701151	3.0824e-06	3.65667e-05
ENSG00000142687	KIAA0319L	5.65773	5.51994	5.43438	6.00361	5.94456	6.01507	5.72024	5.72529	5.57119	6.14154	6.08875	6.07367	0.450181	1.36621	4.00215e-06	0.000132193	5.39771	0.134622	1.09781	0.0668413	0.197194	0.563897	1.47826	1.82617e-07	3.73135e-06
ENSG00000081923	ATP8B1	4.40155	4.12314	4.53553	5.29449	5.23618	5.40225	4.15176	4.31717	4.47115	4.82352	4.99313	5.03251	0.958147	1.94281	4.06428e-06	0.000133705	5.39102	-0.0391155	0.973251	0.801633	0.916256	0.59654	1.51209	0.000798601	0.00344651
ENSG00000100410	PHF5A	6.45889	6.60941	6.48235	6.01863	5.99232	6.00156	6.408	6.24305	6.14513	6.02822	5.92822	5.8899	-0.512826	0.700848	4.06779e-06	0.000133705	5.39064	-0.251721	0.839894	0.00425131	0.027093	-0.567979	0.674561	1.09276e-06	1.59357e-05
ENSG00000071794	HLTF	5.65403	5.55506	5.94611	6.35685	6.42438	6.4229	5.53497	5.5043	5.69003	5.99447	5.9902	6.11915	0.683465	1.60599	4.09332e-06	0.000133705	5.38792	-0.141352	0.906669	0.203913	0.419285	0.316455	1.24527	0.00754297	0.0219499
ENSG00000081059	TCF7	4.80599	4.73164	4.51601	5.2526	5.17809	5.26445	4.37773	4.28038	4.42988	4.98348	4.84835	4.74144	0.546668	1.46071	4.09766e-06	0.000133705	5.38746	-0.322301	0.799793	0.00175357	0.0139999	0.173375	1.12769	0.0545846	0.11138
ENSG00000189060	H1F0	9.6467	9.6467	9.65215	9.12551	9.15508	9.33142	9.65215	9.62801	9.73464	9.23856	9.18232	9.43569	-0.444622	0.734777	4.10256e-06	0.000133705	5.38695	0.0231101	1.01615	0.731466	0.875484	-0.363279	0.777396	4.33837e-05	0.000317442
ENSG00000060138	CSDA	8.34931	8.36194	8.3002	7.95129	7.91568	7.96429	8.81193	8.7745	8.88509	8.533	8.48153	8.56024	-0.393468	0.761298	4.10656e-06	0.000133705	5.38652	0.486656	1.40119	1.7084e-07	1.03604e-05	0.187655	1.13891	0.00497021	0.0155785
ENSG00000106392	C1GALT1	5.56933	5.39553	5.59448	4.88978	4.96286	5.01108	5.45457	5.52915	5.41265	4.94591	5.02399	5.0987	-0.565075	0.67592	4.10966e-06	0.000133705	5.38619	-0.0540992	0.963196	0.522152	0.732182	-0.497043	0.708557	1.78725e-05	0.000153348
ENSG00000133835	HSD17B4	7.22011	7.1666	7.21358	6.748	6.86579	6.84515	7.17703	7.19943	7.18779	6.8765	6.91978	6.80422	-0.380466	0.768189	4.15816e-06	0.000134993	5.3811	-0.0119729	0.991735	0.835089	0.936795	-0.333052	0.793855	1.98896e-05	0.000166969
ENSG00000135390	ATP5G2	6.84372	6.89541	6.55826	6.04301	6.03186	6.00429	6.92843	6.83517	6.71102	6.27194	6.3063	5.97074	-0.739797	0.598823	4.20434e-06	0.000136201	5.3763	0.0585638	1.04143	0.594484	0.78631	-0.582536	0.667789	6.23728e-05	0.000425962
ENSG00000187867	PALM3	3.46451	3.55389	3.65718	2.89368	2.73778	2.9916	2.92773	2.7908	3.01969	2.59639	2.30472	2.50913	-0.684092	0.622397	4.24267e-06	0.00013715	5.37236	-0.645452	0.639293	8.44267e-06	0.000224955	-1.08817	0.470357	9.70061e-09	4.07399e-07
ENSG00000101230	ISM1	0.913774	0.672967	0.791471	1.98434	1.45807	1.74149	0.669404	0.764357	0.886155	1.53572	1.41842	1.40934	0.93534	1.91234	4.28103e-06	0.000138095	5.36845	-0.0193488	0.986678	0.895359	0.969883	0.661918	1.58219	0.000227437	0.00123105
ENSG00000154102	C16orf74	3.19167	3.15013	2.89082	4.01341	3.80875	3.77687	2.50913	2.44399	2.13841	3.35849	3.4823	3.03433	0.788519	1.7273	4.29603e-06	0.000138285	5.36693	-0.71446	0.609433	4.33398e-05	0.000797421	0.214826	1.16056	0.0998443	0.18195
ENSG00000110917	MLEC	8.59915	8.46285	8.57855	8.92352	8.93543	8.93148	8.72009	8.78167	8.85163	8.9794	8.95958	9.0712	0.383365	1.30438	4.34725e-06	0.000139637	5.36179	0.237724	1.17913	0.000779421	0.00745055	0.456481	1.37219	4.22501e-07	7.42241e-06
ENSG00000131373	HACL1	3.88723	4.00054	3.96161	3.35788	3.4673	3.34256	4.01849	3.99771	3.91348	3.37042	3.43875	3.22849	-0.560514	0.678061	4.37271e-06	0.000140158	5.35925	0.026666	1.01866	0.747764	0.885415	-0.603393	0.658204	1.69583e-06	2.25728e-05
ENSG00000132780	NASP	8.231	8.23581	8.21151	7.62817	7.73197	7.82871	7.768	7.71085	7.61241	7.3208	7.27958	7.19852	-0.496625	0.708763	4.42053e-06	0.000141392	5.35453	-0.52909	0.692992	2.00184e-06	7.10771e-05	-0.959632	0.514188	4.55951e-10	4.3751e-08
ENSG00000063978	RNF4	7.08328	7.03226	6.86247	6.60035	6.62552	6.47449	6.82223	6.78772	6.79114	6.56407	6.54518	6.38737	-0.425995	0.744325	4.431e-06	0.000141428	5.3535	-0.19255	0.875058	0.00788432	0.042879	-0.493657	0.710223	6.59157e-07	1.06654e-05
ENSG00000114446	IFT57	4.13945	4.38277	4.4161	4.8404	4.90775	4.95221	4.22668	4.1862	4.43771	4.8525	4.75059	4.76505	0.587423	1.50256	4.44107e-06	0.000141452	5.35251	-0.0288925	0.980172	0.759253	0.89309	0.476987	1.39183	5.40408e-05	0.00037861
ENSG00000171862	PTEN	6.50596	6.44628	6.56087	6.95415	6.94205	6.97997	6.79557	6.99047	7.00686	7.17286	7.16831	7.33742	0.454467	1.37028	4.46802e-06	0.000142012	5.34988	0.42681	1.34426	9.82008e-06	0.000254935	0.721662	1.64908	6.21982e-09	2.85753e-07
ENSG00000187017	ESPN	3.80606	3.91567	3.99364	4.87477	4.73453	4.47982	3.91772	3.84826	3.92639	4.81103	5.12131	4.6539	0.791942	1.7314	4.49728e-06	0.000142643	5.34705	-0.00743086	0.994863	0.953921	0.999959	0.957929	1.94252	3.14136e-07	5.81516e-06
ENSG00000113648	H2AFY	7.9601	8.0543	7.91747	7.57544	7.60952	7.62935	7.89617	7.76933	7.73923	7.60952	7.49351	7.44036	-0.372664	0.772355	4.53219e-06	0.000143215	5.34369	-0.175873	0.885231	0.00615312	0.0358109	-0.462713	0.725621	2.65723e-07	5.06745e-06
ENSG00000251022	THAP9-AS1	4.34923	4.3648	4.53204	4.83831	5.02858	4.97408	4.33896	4.28002	4.1092	4.67174	4.82729	4.75977	0.531883	1.44582	4.53422e-06	0.000143215	5.3435	-0.172433	0.887345	0.0574165	0.177372	0.337792	1.26382	0.000675342	0.00300084
ENSG00000105355	PLIN3	7.53197	7.55586	7.56234	8.11532	7.96282	7.90215	7.87042	7.82201	7.84556	8.21323	8.24161	8.26314	0.443497	1.3599	4.65729e-06	0.000146797	5.33187	0.29595	1.22769	0.000421468	0.00474731	0.689223	1.61242	9.39428e-09	4.01202e-07
ENSG00000122642	FKBP9	6.04951	5.91059	5.80823	6.4601	6.45032	6.34085	6.07433	5.97604	5.7846	6.56163	6.4932	6.38993	0.494228	1.40857	4.83576e-06	0.000152106	5.31554	0.0218863	1.01529	0.780063	0.904095	0.558952	1.4732	9.30749e-07	1.39587e-05
ENSG00000136045	PWP1	6.88489	6.93934	6.86523	6.52575	6.58007	6.496	6.91391	6.79998	6.84563	6.51673	6.53485	6.53753	-0.362588	0.777768	4.91217e-06	0.000154189	5.30873	-0.0434176	0.970354	0.438726	0.664821	-0.366897	0.775449	4.13367e-06	4.59461e-05
ENSG00000023839	ABCC2	7.27677	7.1746	7.35213	7.78948	7.74854	7.89617	7.29151	7.3347	7.448	7.64777	7.60329	7.93743	0.543663	1.45767	4.93112e-06	0.000154464	5.30705	0.0904663	1.06471	0.29932	0.530386	0.461355	1.37683	3.52365e-05	0.000266046
ENSG00000132646	PCNA	8.84044	8.87315	8.8899	8.38652	8.43528	8.56267	8.93543	8.93148	8.85964	8.54069	8.54677	8.57127	-0.406417	0.754495	4.95577e-06	0.000154916	5.30489	0.0410185	1.02884	0.513491	0.725337	-0.314944	0.803882	9.05352e-05	0.000577938
ENSG00000131943	C19orf12	3.11085	3.17305	3.18977	3.8571	3.75422	3.79801	3.47441	3.5096	3.37929	4.08151	4.27127	4.32926	0.645322	1.56409	4.97544e-06	0.000155211	5.30317	0.296531	1.22819	0.00925085	0.0482132	1.06886	2.09777	2.90319e-09	1.64648e-07
ENSG00000101144	BMP7	2.62838	2.32044	2.19071	3.35142	3.3456	3.14486	2.80604	2.47701	2.718	3.60645	3.51431	3.58941	0.900707	1.86698	5.00097e-06	0.000155687	5.30095	0.286793	1.21993	0.0613611	0.185651	1.18983	2.28126	9.25977e-08	2.20735e-06
ENSG00000136828	RALGPS1	1.74174	1.75374	1.92035	2.56513	2.77388	2.72414	2.09769	2.2028	2.19996	2.7503	2.8734	2.88329	0.882519	1.84359	5.08177e-06	0.000157878	5.29399	0.361795	1.28502	0.0187567	0.0803534	1.03028	2.04242	5.90198e-07	9.70581e-06
ENSG00000184979	USP18	3.76242	3.84038	3.70337	3.1712	3.18663	2.92344	3.56658	3.34012	3.36427	2.92773	2.84097	2.50598	-0.67488	0.626384	5.19069e-06	0.000160933	5.28477	-0.345438	0.787069	0.00332387	0.0225877	-1.00952	0.496713	2.87539e-08	9.27526e-07
ENSG00000185567	AHNAK2	5.8194	5.7483	5.68133	5.11249	4.93226	4.85679	5.99328	6.18147	5.99471	5.29102	5.32919	5.53835	-0.78237	0.581411	5.24955e-06	0.000162425	5.27988	0.306674	1.23685	0.0151665	0.0692381	-0.364237	0.776879	0.00630854	0.0189732
ENSG00000259850	RP11-45M22.1	5.15405	5.13624	5.46333	5.67622	5.83539	5.73355	5.15966	5.08958	5.09841	5.6013	5.62028	5.53026	0.497718	1.41198	5.34445e-06	0.000165025	5.2721	-0.134806	0.910792	0.107144	0.27195	0.33348	1.26005	0.000452727	0.00216524
ENSG00000112290	WASF1	4.98452	4.80509	5.01643	5.63628	5.52408	5.75491	5.14581	5.09564	5.25438	5.63197	5.65909	5.8384	0.703248	1.62817	5.35729e-06	0.000165085	5.27105	0.230323	1.1731	0.0534576	0.168883	0.774329	1.71039	1.46604e-06	2.02613e-05
ENSG00000116791	CRYZ	6.42819	6.5367	6.57831	5.93566	5.96063	6.17622	6.40641	6.41905	6.24165	5.9139	5.90027	5.88078	-0.490356	0.711849	5.36844e-06	0.000165093	5.27015	-0.158688	0.895839	0.0479246	0.156356	-0.615931	0.652509	2.81565e-07	5.3146e-06
ENSG00000170270	C14orf142	3.37055	3.604	3.69795	4.16683	4.17823	4.25931	3.36323	3.28443	3.29852	4.17244	4.09559	3.93337	0.644149	1.56282	5.41116e-06	0.00016607	5.26671	-0.241834	0.845669	0.0346833	0.124875	0.51069	1.42473	8.47463e-05	0.000546972
ENSG00000091490	SEL1L3	6.52975	6.4979	6.46178	6.92864	6.98689	6.89769	6.47225	6.5002	6.47718	6.87477	6.89944	6.80764	0.441241	1.35777	5.42855e-06	0.000166267	5.26532	-0.0133252	0.990806	0.850028	0.945551	0.364236	1.2872	5.23449e-05	0.000368774
ENSG00000247315	AL034548.1	5.76259	5.84367	5.62491	5.16415	5.2248	5.21103	6.08778	6.18452	5.91013	5.66411	5.69401	5.62789	-0.544052	0.685842	5.45145e-06	0.000166632	5.26349	0.316705	1.24548	0.00104899	0.00933865	-0.0819042	0.94481	0.330302	0.464537
ENSG00000164904	ALDH7A1	6.99128	7.0251	6.91934	6.5079	6.48846	6.58369	7.07717	6.95096	6.93934	6.6807	6.62832	6.62329	-0.452084	0.730986	5.52342e-06	0.000168492	5.25779	0.0104108	1.00724	0.881002	0.962519	-0.334502	0.793058	0.000155475	0.000899541
ENSG00000158164	TMSB15A	4.03518	4.26979	4.11542	3.35563	3.3456	3.4099	3.80699	3.63493	3.34588	3.53499	3.42968	3.01636	-0.770039	0.586401	5.55164e-06	0.000169013	5.25558	-0.544718	0.685525	0.000223941	0.00292435	-0.811695	0.569712	2.84573e-06	3.44878e-05
ENSG00000133706	LARS	7.94798	7.9116	7.97976	7.5973	7.65288	7.60745	7.80086	7.83498	7.79099	7.48369	7.51245	7.35419	-0.327174	0.797096	5.61321e-06	0.000170545	5.25079	-0.137449	0.909125	0.0141359	0.0657406	-0.496048	0.709046	2.04387e-08	6.97907e-07
ENSG00000268173	PIK3R2	6.44082	6.36403	6.29143	6.86142	6.81161	6.70049	6.49906	6.33561	6.50738	7.01321	6.96676	6.82812	0.42575	1.34327	5.66277e-06	0.000171707	5.24697	0.0818128	1.05835	0.23794	0.462192	0.570826	1.48537	1.02622e-07	2.37536e-06
ENSG00000082068	WDR70	5.35857	5.49806	5.40253	4.84401	5.04455	5.06388	5.50101	5.37461	5.46748	5.18022	5.1395	5.16723	-0.435874	0.739246	5.79127e-06	0.000175252	5.23723	0.0278768	1.01951	0.677303	0.842655	-0.257497	0.836538	0.00123748	0.00496858
ENSG00000132603	NIP7	6.97414	7.00962	6.86818	6.52016	6.44501	6.40312	6.94253	6.86338	6.68503	6.47752	6.38213	6.33561	-0.494631	0.709743	5.83668e-06	0.00017613	5.23383	-0.120613	0.919797	0.128669	0.30723	-0.552146	0.682005	1.44358e-06	2.01159e-05
ENSG00000115963	RND3	3.76312	3.7273	3.90047	4.21201	4.43847	4.31717	3.81524	3.91592	4.02732	4.64792	4.52861	4.49861	0.525873	1.4398	5.84349e-06	0.00017613	5.23333	0.123021	1.08901	0.160403	0.357891	0.762135	1.696	3.02991e-08	9.6505e-07
ENSG00000047597	XK	4.07212	3.95662	4.12019	4.63084	4.68347	4.62968	3.72558	3.89373	3.63346	4.29272	4.16071	4.36848	0.598657	1.51431	5.8809e-06	0.000176906	5.23056	-0.298522	0.813085	0.00759805	0.0419345	0.224234	1.16816	0.0302408	0.0689237
ENSG00000234771	RP11-395P17.3	1.31744	1.04618	1.40375	0.1154	0.291233	0.300077	1.36406	1.19756	1.31288	0.397908	0.272597	0.789566	-1.02006	0.493097	5.91188e-06	0.000177401	5.22827	0.0359149	1.02521	0.819563	0.927495	-0.769298	0.586703	0.000137283	0.000811757
ENSG00000164038	SLC9B2	4.70356	4.51486	4.65846	3.94146	4.21147	3.94676	4.5458	4.60963	4.72801	3.79932	3.77188	3.93954	-0.592107	0.663374	5.92919e-06	0.000177401	5.227	0.00250428	1.00174	0.977702	1	-0.789021	0.578737	1.53381e-07	3.21633e-06
ENSG00000198538	ZNF28	4.22386	3.95977	4.31332	4.82931	4.94433	4.92654	4.52314	4.51633	4.72748	5.02191	5.06751	5.25666	0.734936	1.66432	5.93249e-06	0.000177401	5.22676	0.42409	1.34173	0.0019843	0.0153804	0.949673	1.93143	1.66286e-07	3.43002e-06
ENSG00000109787	KLF3	6.03344	5.85628	5.96471	6.47752	6.46272	6.5278	6.18591	6.32599	6.24349	6.50769	6.58334	6.63047	0.537913	1.45187	6.03477e-06	0.000179945	5.21934	0.300428	1.23151	0.00242562	0.0178953	0.622234	1.53926	8.65004e-07	1.32068e-05
ENSG00000145907	G3BP1	9.65215	9.50653	9.5768	9.18232	9.22075	9.18685	9.39795	9.50653	9.40997	9.03064	9.06409	9.05135	-0.381821	0.767468	6.04128e-06	0.000179945	5.21887	-0.140315	0.907321	0.029403	0.11089	-0.529791	0.692655	7.87605e-08	1.95467e-06
ENSG00000079215	SLC1A3	4.70162	4.46467	5.17651	5.62461	5.65312	6.00247	4.34884	4.34209	4.93042	5.46612	5.50656	5.55615	0.980063	1.97255	6.07345e-06	0.000180548	5.21656	-0.238782	0.84746	0.161732	0.359367	0.729769	1.65837	0.000185629	0.00104118
ENSG00000128805	ARHGAP22	2.36519	2.26549	2.31859	3.03513	2.97829	2.72414	2.14273	2.12639	2.32098	2.9982	2.9175	2.85466	0.596518	1.51206	6.08585e-06	0.000180563	5.21568	-0.119571	0.920461	0.233635	0.457049	0.607463	1.52358	4.64678e-06	5.07929e-05
ENSG00000164749	HNF4G	2.82848	2.80735	3.01636	1.83566	2.16551	2.22431	2.71712	2.74368	2.76882	1.69526	1.48881	1.83527	-0.808821	0.570848	6.27379e-06	0.000185775	5.20247	-0.140429	0.907249	0.263005	0.490156	-1.21085	0.432015	3.38284e-08	1.04364e-06
ENSG00000259673	IQCH-AS1	1.78791	1.89748	2.08467	2.61609	2.81326	2.88177	2.19163	2.13131	2.19611	2.81326	2.71509	2.70795	0.847036	1.7988	6.33755e-06	0.000187297	5.19808	0.249955	1.18917	0.0851568	0.232348	0.8226	1.76859	8.92451e-06	8.6695e-05
ENSG00000147231	CXorf57	4.07661	4.16047	4.1554	3.49068	3.61055	3.58924	3.80462	3.87497	3.84812	3.33451	3.08456	3.28815	-0.567399	0.674833	6.38237e-06	0.000188255	5.19502	-0.288201	0.818923	0.00406845	0.0262811	-0.895131	0.537698	1.6922e-08	6.17575e-07
ENSG00000146094	DOK3	2.73336	2.57799	2.9641	1.963	1.68224	2.12897	2.90819	2.81485	2.77894	1.81175	2.16738	1.98574	-0.833315	0.561238	6.45214e-06	0.000189943	5.1903	0.0760893	1.05416	0.54656	0.750416	-0.769729	0.586528	1.57013e-05	0.000138078
ENSG00000100298	APOBEC3H	0.143819	0.0113132	0.0296838	0.812817	0.916563	0.833207	0.377627	0.119056	0.296418	1.04998	1.37699	0.846651	0.792587	1.73218	6.58923e-06	0.000193603	5.18117	0.202746	1.15089	0.12501	0.301171	1.02992	2.04192	1.93502e-07	3.89082e-06
ENSG00000181773	GPR3	2.37154	2.40624	2.51356	1.49038	1.44639	1.57154	2.47774	2.75232	2.60658	1.61239	1.97756	1.35095	-0.927524	0.52576	6.67621e-06	0.000195779	5.17547	0.182027	1.13448	0.204561	0.419856	-0.78273	0.581266	4.56182e-05	0.000330601
ENSG00000172830	SSH3	3.96767	3.89713	3.60814	4.58873	4.42757	4.44778	3.987	3.77597	3.8295	4.48763	4.23321	4.21343	0.663203	1.58359	6.68945e-06	0.000195789	5.17461	0.0391086	1.02748	0.722728	0.87098	0.48715	1.40167	0.000228064	0.00123276
ENSG00000156261	CCT8	9.51212	9.51212	9.59479	9.22451	9.25803	9.2887	9.46548	9.44663	9.44663	9.25314	9.25314	9.19857	-0.282559	0.822132	6.71923e-06	0.000196282	5.17268	-0.0866988	0.941675	0.065908	0.195277	-0.304581	0.809677	2.59264e-06	3.19569e-05
ENSG00000176624	MEX3C	6.01144	5.84165	6.05266	6.408	6.5587	6.48732	6.24087	6.29465	6.39662	6.50464	6.50348	6.58244	0.516296	1.43028	6.78957e-06	0.000197955	5.16816	0.342436	1.2679	0.000605651	0.00616673	0.561677	1.47598	2.2373e-06	2.83609e-05
ENSG00000170191	NANP	4.46972	4.55105	4.5172	4.01187	4.04871	4.04798	4.47165	4.44413	4.4039	4.02295	4.09559	4.18942	-0.476536	0.718701	6.80705e-06	0.000198084	5.16704	-0.0728389	0.950765	0.331098	0.56326	-0.410526	0.752349	3.58761e-05	0.000270202
ENSG00000204394	VARS	8.15066	8.11638	8.0054	8.67317	8.50796	8.42554	8.26314	8.13487	8.11532	8.61087	8.59138	8.40946	0.444747	1.36108	6.85468e-06	0.000199088	5.16401	0.0801391	1.05712	0.272763	0.500831	0.446595	1.36282	6.39968e-06	6.62743e-05
ENSG00000114770	ABCC5	4.96306	4.74404	5.37061	3.85473	3.73498	4.02119	5.00621	5.04321	5.33133	3.91819	3.8553	4.39984	-1.15481	0.449127	7.02919e-06	0.000203682	5.15309	0.102288	1.07347	0.547496	0.75098	-0.968756	0.510947	4.44516e-05	0.000323755
ENSG00000213977	TAX1BP3	5.45534	5.42295	5.33844	6.15186	5.98405	5.93088	5.5554	5.59066	5.41469	6.16377	6.29143	6.09482	0.616699	1.53336	7.05021e-06	0.000203682	5.1518	0.114454	1.08257	0.265721	0.492866	0.777847	1.71457	3.04023e-07	5.65558e-06
ENSG00000106799	TGFBR1	5.36908	5.19429	5.47184	5.97074	5.98483	5.9973	5.90382	6.12826	6.07433	6.27111	6.26212	6.55682	0.639602	1.5579	7.05318e-06	0.000203682	5.15162	0.690867	1.61425	2.61094e-06	8.87544e-05	1.01806	2.02519	9.52546e-09	4.03395e-07
ENSG00000125814	NAPB	3.03181	3.07016	2.84856	2.23242	2.17148	2.42827	3.2055	3.21883	3.18032	2.27446	2.49673	2.52325	-0.706779	0.612687	7.06845e-06	0.000203735	5.15068	0.217604	1.1628	0.0539164	0.169802	-0.552994	0.681604	0.000101522	0.000633927
ENSG00000111231	GPN3	5.78221	5.93824	5.89538	5.22946	5.31813	5.38362	5.79801	5.75257	5.61349	5.29204	5.27336	5.12857	-0.561695	0.677506	7.0976e-06	0.000204187	5.14889	-0.150685	0.900823	0.100182	0.259758	-0.640191	0.641628	1.37751e-06	1.94563e-05
ENSG00000185619	PCGF3	6.08542	6.00029	6.17128	5.51357	5.64922	5.64958	6.3209	6.36342	6.44628	5.84427	5.91813	6.07499	-0.481432	0.716266	7.19137e-06	0.000206072	5.14319	0.291464	1.22388	0.000969589	0.00886072	-0.140126	0.90744	0.0774992	0.147739
ENSG00000221988	PPT2	3.96325	3.90079	3.82189	3.46897	3.4128	3.45773	3.95687	3.87378	3.9802	3.60943	3.56893	3.68367	-0.449012	0.732544	7.19996e-06	0.000206072	5.14267	0.0414697	1.02916	0.553005	0.755121	-0.275122	0.82638	0.00103674	0.00428052
ENSG00000163755	HPS3	4.50102	4.42027	4.51486	4.94625	4.85821	5.02637	4.08332	4.05712	4.14229	4.46526	4.61048	4.49779	0.464917	1.38024	7.2039e-06	0.000206072	5.14243	-0.384273	0.766165	0.000118847	0.00177872	0.0459717	1.03238	0.548596	0.678462
ENSG00000189223	AC016683.6	5.80946	5.86523	5.78526	5.38906	5.41522	5.48752	5.87157	5.83967	5.89704	5.50939	5.40077	5.47511	-0.389575	0.763355	7.25529e-06	0.000207152	5.13935	0.0493634	1.03481	0.423817	0.652069	-0.358315	0.780075	1.87892e-05	0.000159767
ENSG00000058085	LAMC2	7.48407	7.46392	7.30996	7.90632	7.84037	7.80717	7.60745	7.6863	7.63936	8.05777	8.00753	8.08748	0.431854	1.34897	7.28937e-06	0.000207733	5.13731	0.224893	1.16869	0.00444808	0.0280522	0.631377	1.54904	3.98595e-08	1.16545e-06
ENSG00000188039	NWD1	1.89892	1.20317	1.61362	2.59031	2.49028	2.39205	1.57422	1.80295	1.65255	2.61805	2.58967	2.81055	0.919383	1.89131	7.38257e-06	0.000209949	5.13179	0.104885	1.07541	0.497007	0.713393	1.10045	2.14421	6.20355e-07	1.00914e-05
ENSG00000155755	TMEM237	5.39159	5.4	5.36129	4.89094	4.9581	4.93343	5.00348	5.04009	4.78222	4.58219	4.53566	4.44385	-0.456892	0.728554	7.40111e-06	0.000209949	5.1307	-0.442568	0.735823	1.07893e-05	0.000273541	-0.86337	0.549667	1.42759e-09	1.01139e-07
ENSG00000104388	RAB2A	6.14011	6.21689	6.19638	6.57649	6.61677	6.62552	6.17447	6.17421	6.18888	6.57003	6.58966	6.47606	0.421761	1.33956	7.40867e-06	0.000209949	5.13026	-0.00527305	0.996352	0.939092	0.992582	0.360998	1.28431	4.60115e-05	0.000332974
ENSG00000204954	C12orf73	3.68693	3.80606	3.73832	3.00608	3.1318	3.28665	3.83121	3.68761	3.77101	3.45201	3.34896	3.54075	-0.602672	0.658533	7.509e-06	0.000212396	5.12442	0.019398	1.01354	0.834516	0.936472	-0.297006	0.81394	0.00532923	0.016479
ENSG00000170113	NIPA1	5.41949	5.34734	5.61032	6.07749	6.10664	6.17591	5.58334	5.66472	5.82017	6.01108	5.98671	6.2428	0.661274	1.58148	7.54921e-06	0.000212701	5.1221	0.230868	1.17354	0.0451458	0.14964	0.621016	1.53796	1.60018e-05	0.00013999
ENSG00000175305	CCNE2	5.33423	5.47865	5.28168	4.50277	4.61531	4.34257	3.63888	4.01702	3.45476	2.48645	2.7133	2.34568	-0.877991	0.544124	7.5616e-06	0.000212701	5.12139	-1.66175	0.316055	2.53315e-09	4.17446e-07	-2.84939	0.138755	2.24681e-12	1.03224e-09
ENSG00000100784	RPS6KA5	2.89798	2.80218	3.01388	2.06274	2.30164	2.11298	3.02904	3.0978	3.16409	1.82312	1.87088	1.95687	-0.745182	0.596593	7.5619e-06	0.000212701	5.12137	0.19275	1.14294	0.101842	0.262387	-1.02097	0.492786	1.39508e-07	2.95875e-06
ENSG00000135604	STX11	0.534067	0.343678	0.909158	-0.136269	-0.337396	-0.276117	0.163429	0.478056	0.473299	-0.0519282	0.115658	-0.167407	-0.845221	0.556626	7.64331e-06	0.000214227	5.11672	-0.223672	0.856383	0.110036	0.276648	-0.629744	0.646291	0.000195282	0.00108768
ENSG00000083444	PLOD1	8.47181	8.50999	8.31841	8.88509	8.77861	8.86817	8.50796	8.43081	8.51235	8.90345	8.79693	8.71279	0.410383	1.32904	7.6444e-06	0.000214227	5.11666	0.0501426	1.03537	0.45644	0.681036	0.371047	1.29329	2.52454e-05	0.00020294
ENSG00000132275	RRP8	4.70728	4.87597	4.79076	4.37395	4.22549	4.29434	4.63439	4.59898	4.57752	4.44818	4.39935	4.33874	-0.493444	0.710327	7.79867e-06	0.000218147	5.10798	-0.187826	0.877928	0.0255098	0.100455	-0.395678	0.760132	8.70425e-05	0.000559649
ENSG00000100221	JOSD1	6.77177	6.79774	6.67558	7.11631	7.18348	7.14244	6.72925	6.78459	6.72394	6.97905	6.97354	7.02308	0.398891	1.31849	7.8473e-06	0.000218852	5.10528	-0.00259318	0.998204	0.968381	1	0.243289	1.18369	0.00135288	0.00534139
ENSG00000144677	CTDSPL	5.74163	5.6426	5.65448	6.05046	6.16628	6.02412	5.41706	5.48653	5.46871	5.8952	5.95004	5.8415	0.40075	1.32019	7.85396e-06	0.000218852	5.10491	-0.222133	0.857297	0.00349171	0.0234966	0.216149	1.16163	0.00359217	0.0119735
ENSG00000187720	THSD4	3.33146	3.30811	3.27527	4.14211	4.1881	4.00084	3.18032	3.27127	3.18587	4.018	4.01413	4.08011	0.805539	1.7478	7.86718e-06	0.000218852	5.10418	-0.0925402	0.93787	0.504733	0.718657	0.732175	1.66114	2.49038e-05	0.000200689
ENSG00000094631	HDAC6	5.34213	5.27113	5.1404	4.70792	4.76178	4.57196	5.38381	5.3874	5.29999	4.90236	4.66471	4.7882	-0.570719	0.673281	7.90702e-06	0.000219557	5.10199	0.105546	1.0759	0.242136	0.467527	-0.466228	0.723855	7.21911e-05	0.000480118
ENSG00000123411	IKZF4	2.03152	1.98434	2.12793	2.94611	2.96861	2.72414	2.42135	2.5124	2.27197	2.96835	3.01432	2.85466	0.832167	1.78036	8.07584e-06	0.000223466	5.09281	0.354063	1.27815	0.0186701	0.0800553	0.898437	1.86404	2.85788e-06	3.45673e-05
ENSG00000103888	KIAA1199	3.65964	3.54075	3.42738	4.72823	4.64431	4.45296	3.38187	3.29582	3.46793	4.52393	4.43448	4.02457	1.06595	2.09354	8.07728e-06	0.000223466	5.09273	-0.16094	0.894442	0.39323	0.623224	0.78637	1.72473	0.000268721	0.00140874
ENSG00000133687	TMTC1	0.98778	0.90794	1.41968	1.89305	2.21984	1.99994	1.28731	1.5015	1.66677	1.66444	1.87088	1.57342	0.93279	1.90896	8.1042e-06	0.000223803	5.09129	0.380494	1.30179	0.0224494	0.0915022	0.598374	1.51401	0.00096253	0.00403342
ENSG00000127483	HP1BP3	7.11167	6.98548	7.11921	7.46193	7.52634	7.52947	7.02579	6.98314	6.93673	7.25004	7.23931	7.29473	0.433885	1.35087	8.14647e-06	0.000224561	5.08903	-0.0901466	0.939427	0.218378	0.438679	0.18928	1.14019	0.014581	0.0378143
ENSG00000171552	BCL2L1	7.94227	8.01905	7.82077	8.40388	8.28605	8.27481	8.15646	8.08579	8.17292	8.51505	8.47491	8.46859	0.394098	1.31412	8.17028e-06	0.000224809	5.08776	0.210863	1.15738	0.00388804	0.0253752	0.558695	1.47294	7.24073e-08	1.82657e-06
ENSG00000105810	CDK6	8.11877	7.85925	8.27481	6.95152	7.08149	7.08773	8.02405	8.34931	8.38214	6.94171	7.13961	7.35805	-1.04377	0.485059	8.22636e-06	0.000225942	5.08479	0.167996	1.1235	0.307702	0.539563	-0.938138	0.521906	2.70053e-05	0.000214585
ENSG00000107679	PLEKHA1	6.56735	6.56147	6.64653	5.8753	5.88972	6.10252	6.61121	6.63266	6.70329	5.88746	6.01584	6.3334	-0.636031	0.643481	8.28774e-06	0.000227143	5.08156	0.057428	1.04061	0.567441	0.765662	-0.513674	0.700436	8.72283e-05	0.000560131
ENSG00000144228	SPOPL	5.30429	5.26983	5.53736	6.01769	6.0271	6.17272	5.44332	5.55441	5.78352	6.01312	6.14487	6.35736	0.702309	1.62711	8.30007e-06	0.000227143	5.08092	0.223865	1.16786	0.0673473	0.198194	0.80105	1.74237	1.45492e-06	2.02078e-05
ENSG00000198039	ZNF273	3.30634	3.23881	3.39879	4.01784	3.84122	4.08891	3.00547	2.98232	2.94328	3.2847	3.3882	3.5152	0.668139	1.58902	8.31576e-06	0.000227163	5.0801	-0.337373	0.791481	0.0087537	0.0462609	0.0810057	1.05776	0.473575	0.609341
ENSG00000109089	CDR2L	4.85353	4.92795	4.9365	5.49191	5.37373	5.38302	4.82209	4.69998	5.10685	5.29686	5.23401	5.32102	0.510359	1.4244	8.42633e-06	0.000229769	5.07436	-0.0294337	0.979805	0.730822	0.875058	0.377904	1.29945	0.000244724	0.00130781
ENSG00000168175	MAPK1IP1L	6.93226	6.88466	6.81554	6.55154	6.55986	6.46845	6.97298	7.06033	6.99421	6.58798	6.60585	6.57451	-0.350895	0.784097	8.56324e-06	0.000232472	5.06736	0.131589	1.0955	0.0286268	0.108829	-0.288104	0.818978	7.78145e-05	0.000508511
ENSG00000182919	C11orf54	5.06887	5.17255	5.17126	4.55736	4.63829	4.77707	5.50973	5.49323	5.59172	5.14581	5.20925	5.31477	-0.480205	0.716876	8.56411e-06	0.000232472	5.06732	0.394084	1.31411	4.69966e-05	0.000842217	0.0853414	1.06094	0.264896	0.391664
ENSG00000147402	GABRQ	4.34135	4.05877	4.36505	3.52792	3.61675	3.62376	3.68552	3.68035	3.83948	2.7503	2.97062	2.9982	-0.66518	0.63061	8.57682e-06	0.000232472	5.06667	-0.519327	0.697697	0.000124947	0.00184812	-1.34878	0.392625	8.28911e-10	6.86728e-08
ENSG00000102678	FGF9	2.7845	2.75107	2.61852	2.01869	1.91056	1.90965	2.19163	2.33622	2.24258	1.79104	1.23616	1.40934	-0.771916	0.585639	8.58678e-06	0.000232472	5.06617	-0.461463	0.72625	0.00142769	0.0118474	-1.23914	0.423624	1.75468e-08	6.34911e-07
ENSG00000147274	RBMX	8.51235	8.57127	8.47951	8.21151	8.22197	8.19384	8.38948	8.30857	8.21652	8.04418	8.08237	7.9862	-0.311997	0.805526	8.6088e-06	0.000232652	5.06506	-0.216312	0.860763	0.000437617	0.00485349	-0.483427	0.715276	2.4661e-08	8.14141e-07
ENSG00000172432	GTPBP2	4.67665	4.75321	4.57752	3.62281	3.47508	3.86759	4.46843	4.28459	4.41553	3.27322	3.20787	3.87627	-1.01468	0.494939	8.62631e-06	0.000232711	5.06418	-0.279947	0.823621	0.0866476	0.234961	-1.21908	0.429557	9.70378e-07	1.44518e-05
ENSG00000158985	CDC42SE2	5.5024	5.50835	5.54329	5.944	5.98203	5.93198	5.47201	5.6013	5.4067	5.77641	5.86957	6.01863	0.434734	1.35166	8.67347e-06	0.000233567	5.06181	-0.0246654	0.983049	0.733354	0.877051	0.369758	1.29214	5.70187e-05	0.000395453
ENSG00000111845	PAK1IP1	5.93088	6.00656	5.85558	5.47463	5.5357	5.52323	5.75011	5.60667	5.61831	5.46013	5.30702	5.31248	-0.420041	0.747403	8.76325e-06	0.000235567	5.05733	-0.272888	0.827661	0.000769845	0.00737311	-0.571042	0.67313	1.67786e-07	3.45156e-06
ENSG00000268471	DKFZP434I0714	2.16446	1.97601	2.3678	0.884978	0.939788	1.47882	1.81798	1.78426	2.05603	0.9633	0.923433	0.827539	-1.06794	0.476999	8.82869e-06	0.000236567	5.0541	-0.282674	0.822066	0.109615	0.275875	-1.26398	0.416393	1.08458e-06	1.58413e-05
ENSG00000204790	CBWD6	5.30352	5.34587	5.36317	4.6697	4.89514	4.9983	5.23169	5.25385	5.16158	5.10484	5.01299	4.9581	-0.48344	0.71527	8.83168e-06	0.000236567	5.05396	-0.12181	0.919034	0.126889	0.304345	-0.31181	0.805631	0.000779154	0.00338863
ENSG00000244687	UBE2V1	7.78284	7.77188	7.70624	7.44174	7.43542	7.46096	7.78475	7.77804	7.84312	7.58249	7.56664	7.52534	-0.307692	0.807933	8.95084e-06	0.000239336	5.04814	0.0482713	1.03403	0.337175	0.568933	-0.195472	0.873287	0.000967585	0.00404454
ENSG00000138131	LOXL4	1.16792	1.36212	1.1138	2.37334	1.93526	1.99305	2.3267	2.18359	2.21522	2.95103	2.98641	2.90935	0.88607	1.84813	9.03671e-06	0.000241207	5.04399	1.02703	2.03782	1.27673e-06	4.91281e-05	1.73434	3.32727	3.51957e-10	3.58122e-08
ENSG00000180917	FTSJD1	5.82207	5.79054	5.82909	5.27981	5.35724	5.38469	5.84577	5.92007	5.81677	5.23605	5.37393	5.5024	-0.47337	0.72028	9.0538e-06	0.000241238	5.04317	0.0469962	1.03311	0.53487	0.741215	-0.443659	0.735267	1.8626e-05	0.000158735
ENSG00000109576	AADAT	4.35151	4.3279	4.41405	3.86825	3.91058	3.8097	4.09771	3.89509	3.87497	3.37495	3.69952	3.49068	-0.501378	0.706432	9.23251e-06	0.000245568	5.03468	-0.408535	0.753388	8.85141e-05	0.00139788	-0.842688	0.557604	1.05291e-08	4.30273e-07
ENSG00000166847	DCTN5	6.78009	6.79209	6.74562	6.36057	6.4069	6.38269	7.04837	7.06987	7.07771	6.66547	6.71507	6.87691	-0.389278	0.763512	9.25391e-06	0.000245707	5.03367	0.292673	1.22491	0.000162989	0.00228463	-0.0205861	0.985832	0.742395	0.84021
ENSG00000131069	ACSS2	5.6	5.65433	5.41106	6.09061	6.06082	5.98981	5.71385	5.80567	5.63838	6.15304	6.13905	6.24133	0.491684	1.40609	9.30052e-06	0.000246247	5.03149	0.163775	1.12021	0.057583	0.177761	0.622121	1.53914	4.03687e-07	7.12491e-06
ENSG00000164088	PPM1M	2.49121	2.62082	2.5252	3.24028	3.06619	3.06072	2.5739	2.47701	2.63025	3.17988	3.12788	3.12403	0.57671	1.49144	9.30673e-06	0.000246247	5.0312	0.0145674	1.01015	0.881442	0.962875	0.598201	1.51383	5.63729e-06	5.95588e-05
ENSG00000159618	GPR114	2.10482	2.06972	1.88551	2.80604	2.72813	2.53842	1.41991	1.63496	1.5517	2.16421	2.31576	2.26168	0.670875	1.59204	9.34332e-06	0.000246439	5.0295	-0.484741	0.714626	0.000542258	0.00568939	0.226768	1.17021	0.0560255	0.113678
ENSG00000089597	GANAB	9.33142	9.22451	9.17784	9.56977	9.538	9.50653	9.29459	9.31084	9.31535	9.50199	9.50199	9.46548	0.293481	1.22559	9.3465e-06	0.000246439	5.02935	0.0622809	1.04412	0.208483	0.425412	0.24522	1.18527	7.341e-05	0.000486225
ENSG00000108100	CCNY	5.98405	5.99798	5.87506	6.33283	6.41358	6.2829	5.8692	5.94456	5.93863	6.27021	6.24009	6.15049	0.390633	1.31097	9.38694e-06	0.000247075	5.02748	-0.0350369	0.976007	0.592519	0.785174	0.267971	1.20411	0.000545825	0.00251563
ENSG00000170852	KBTBD2	5.70056	5.68327	5.76412	5.23968	5.43894	5.27271	5.72768	5.74556	5.77036	5.37845	5.387	5.3419	-0.398737	0.758522	9.47608e-06	0.000248828	5.02337	0.0320151	1.02244	0.617796	0.801644	-0.346652	0.786407	4.52542e-05	0.000328592
ENSG00000160752	FDPS	7.86175	8.03979	7.84556	8.43718	8.29137	8.4185	7.90215	7.79651	7.77426	8.39829	8.31683	8.36611	0.466485	1.38174	9.50537e-06	0.000248828	5.02203	-0.0915864	0.93849	0.248587	0.474425	0.444572	1.36091	1.67364e-05	0.000145078
ENSG00000213699	C2orf18	5.75957	5.76525	5.76926	6.24165	6.29143	6.13213	5.82103	5.72468	5.89009	6.23941	6.20977	6.16653	0.457161	1.37284	9.50636e-06	0.000248828	5.02199	0.0472888	1.03332	0.537823	0.743128	0.440694	1.35726	1.45214e-05	0.000129505
ENSG00000136897	MRPL50	5.10947	5.18604	5.34565	5.63536	5.6602	5.72713	5.13098	4.98815	5.13973	5.61505	5.54217	5.68472	0.460751	1.37626	9.51917e-06	0.000248828	5.0214	-0.127093	0.915674	0.116131	0.286334	0.400361	1.31984	4.89241e-05	0.000350028
ENSG00000198915	RASGEF1A	4.49273	4.38658	4.51063	5.03333	4.85353	4.93546	5.18909	5.14538	5.15424	5.49156	5.38156	5.5401	0.477728	1.39255	9.57807e-06	0.000249539	5.01872	0.699776	1.62425	5.0139e-08	4.06436e-06	1.00777	2.01079	1.54412e-10	1.92243e-08
ENSG00000255112	CHMP1B	5.57004	5.63419	5.6602	5.00092	5.04772	5.13292	6.12183	6.08685	6.03637	5.33314	5.40489	5.74517	-0.561038	0.677814	9.57928e-06	0.000249539	5.01867	0.460225	1.37576	5.19574e-05	0.000908565	-0.127978	0.915113	0.165065	0.270868
ENSG00000157502	MUM1L1	5.52498	5.5368	5.68437	4.91307	5.05686	5.17609	5.50925	5.50632	5.62589	4.73585	4.81935	5.11318	-0.533424	0.690913	9.60967e-06	0.000249901	5.01729	-0.0346049	0.976299	0.684999	0.847858	-0.693428	0.618383	3.53953e-07	6.40368e-06
ENSG00000162337	LRP5	6.38328	6.27492	6.23544	7.01194	6.95152	6.70305	6.24305	6.14011	6.14833	6.76218	6.9156	6.57615	0.591108	1.5064	9.68492e-06	0.000251427	5.0139	-0.120844	0.919649	0.23683	0.460922	0.453818	1.36966	0.000189989	0.00106132
ENSG00000174151	CYB561D1	3.8128	3.77474	3.62065	2.96419	3.21379	2.99589	4.01115	4.26872	4.02321	3.45686	3.37396	3.73334	-0.678402	0.624857	9.73101e-06	0.000252191	5.01184	0.3646	1.28752	0.00234363	0.0174005	-0.216027	0.860933	0.0571166	0.115518
ENSG00000110435	PDHX	6.0593	6.0593	6.06298	5.65278	5.60352	5.78547	5.93863	5.94081	5.99679	5.64896	5.603	5.74753	-0.380073	0.768399	9.75486e-06	0.000252378	5.01078	-0.101751	0.931901	0.112015	0.279779	-0.39429	0.760864	6.09805e-06	6.35413e-05
ENSG00000130508	PXDN	5.63792	5.34957	5.43049	6.12385	6.00133	5.96533	5.42661	5.40339	5.46463	6.10252	6.10858	6.09444	0.557644	1.47186	9.79828e-06	0.000253069	5.00885	-0.0410726	0.971932	0.663903	0.833714	0.629228	1.54674	2.02672e-06	2.62177e-05
ENSG00000163807	KIAA1143	5.31368	5.31271	5.68869	6.07635	6.11123	6.12975	5.47078	5.46822	5.64077	5.86072	5.84859	5.94782	0.667983	1.58885	9.82458e-06	0.000253317	5.00769	0.0889275	1.06358	0.434377	0.660674	0.447749	1.36391	0.000722706	0.00317803
ENSG00000111254	AKAP3	2.68557	2.6266	2.30751	3.36568	3.09081	3.28038	2.86808	2.6743	2.69998	3.35849	3.50215	3.3649	0.705145	1.63031	9.93651e-06	0.000255768	5.00277	0.206868	1.15418	0.097081	0.253985	0.868131	1.8253	5.87363e-07	9.67935e-06
ENSG00000181704	YIPF6	5.92664	5.98797	6.15304	6.45278	6.49624	6.62184	6.26465	6.301	6.2293	6.49674	6.60122	6.82867	0.50118	1.41537	1.0089e-05	0.000259252	4.99615	0.242663	1.18317	0.00890676	0.0468223	0.619268	1.5361	6.1625e-07	1.00462e-05
ENSG00000204536	CCHCR1	4.26666	4.28564	4.16574	3.59906	3.5973	3.58924	3.96473	3.95216	3.69671	3.315	3.38405	3.09689	-0.644369	0.639773	1.01326e-05	0.000259838	4.99428	-0.368577	0.774546	0.00221664	0.0166729	-0.973483	0.509275	5.54206e-08	1.49174e-06
ENSG00000146242	TPBG	4.0961	4.00266	4.33589	4.73525	4.85605	4.81217	4.12081	4.07195	4.31649	4.62009	4.78935	4.85387	0.656873	1.57666	1.0146e-05	0.000259838	4.9937	0.0256681	1.01795	0.819979	0.927542	0.609622	1.52586	2.44758e-05	0.000198013
ENSG00000003436	TFPI	5.3359	5.43049	5.43352	4.77067	4.78415	5.00825	5.48689	5.51636	5.35406	4.99475	4.88163	5.15584	-0.545873	0.684977	1.02571e-05	0.000262239	4.98898	0.0524307	1.03701	0.548546	0.751516	-0.389762	0.763256	0.000344537	0.00173481
ENSG00000111321	LTBR	6.84292	6.82643	6.69039	7.2771	7.15029	7.23552	7.01856	6.83651	6.96832	7.42405	7.32013	7.35578	0.434217	1.35118	1.03248e-05	0.000263157	4.98612	0.15436	1.11293	0.0450351	0.149371	0.579963	1.49481	2.1849e-07	4.30198e-06
ENSG00000143748	NVL	5.04408	5.06498	4.96032	4.52707	4.61206	4.52632	4.93922	4.90685	4.86187	4.43249	4.48032	4.41954	-0.468128	0.722902	1.03277e-05	0.000263157	4.986	-0.120714	0.919732	0.123023	0.297848	-0.57911	0.669377	7.23896e-07	1.15163e-05
ENSG00000133195	SLC39A11	5.33159	5.39711	5.13269	5.87763	5.75326	5.68659	5.27429	5.29895	5.15515	5.78914	5.71093	5.64475	0.48509	1.39967	1.03986e-05	0.000264519	4.98302	-0.0448304	0.969404	0.587492	0.780924	0.427675	1.34506	4.50851e-05	0.000327678
ENSG00000127989	MTERF	4.52209	4.66273	4.67879	4.15243	4.24645	4.27759	4.7021	4.73696	4.7045	4.36196	4.43448	4.40473	-0.395748	0.760095	1.04647e-05	0.000265754	4.98027	0.0934207	1.0669	0.152224	0.34523	-0.220787	0.858097	0.00283511	0.00983145
ENSG00000126934	MAP2K2	5.73728	5.8207	5.66128	6.46135	6.34945	6.22702	5.88078	5.84614	5.83314	6.61785	6.57065	6.2818	0.606169	1.52221	1.05653e-05	0.000267862	4.97612	0.113376	1.08176	0.276813	0.505558	0.750839	1.68277	6.18836e-07	1.00775e-05
ENSG00000130348	QRSL1	5.29409	5.27397	5.36375	5.65662	5.65019	5.68327	5.10607	5.13571	5.16514	5.52522	5.43593	5.52238	0.352871	1.2771	1.07398e-05	0.000271621	4.969	-0.174788	0.885898	0.00887064	0.0466809	0.183993	1.13602	0.00547317	0.0168519
ENSG00000166963	MAP1A	2.90459	2.90332	2.78561	2.18565	2.23178	1.89845	2.15786	1.8615	2.3834	1.25146	1.23616	0.92968	-0.759124	0.590855	1.0762e-05	0.000271621	4.96811	-0.730332	0.602765	1.6746e-05	0.000373363	-1.72527	0.302443	1.52809e-10	1.92243e-08
ENSG00000198925	ATG9A	6.10496	6.10664	5.96769	5.72744	5.58439	5.69887	6.26163	6.17718	6.3281	5.917	5.89467	5.94739	-0.389729	0.763273	1.07674e-05	0.000271621	4.96789	0.195723	1.1453	0.00566992	0.0334221	-0.140348	0.9073	0.0388197	0.0843671
ENSG00000141736	ERBB2	6.36987	6.34666	6.14823	6.76696	6.67287	6.69039	6.47141	6.39798	6.52016	6.83517	6.77402	6.67412	0.421585	1.3394	1.09695e-05	0.000276259	4.95981	0.17468	1.12871	0.0224753	0.0915252	0.472875	1.38787	2.50176e-06	3.10133e-05
ENSG00000213096	ZNF254	1.56435	1.45448	2.00014	2.78967	2.5739	2.95167	1.68817	2.01469	2.25865	2.82925	2.78022	3.07377	1.09897	2.14201	1.1036e-05	0.000277192	4.95719	0.314924	1.24395	0.110899	0.277914	1.22109	2.33123	2.65112e-06	3.25454e-05
ENSG00000135241	PNPLA8	4.92069	5.00304	5.25761	4.15782	4.31422	4.508	5.2668	5.43506	5.46651	4.50245	4.61905	4.98248	-0.733674	0.60137	1.10431e-05	0.000277192	4.95691	0.32962	1.25668	0.00911718	0.0476804	-0.360034	0.779146	0.00658185	0.0196046
ENSG00000006652	IFRD1	5.63072	5.65278	5.72892	5.08116	5.17562	5.15758	5.31309	5.32345	5.13738	4.59672	4.57401	4.95308	-0.532622	0.691297	1.1118e-05	0.000278612	4.95397	-0.412811	0.751158	0.000174041	0.00240313	-0.963901	0.512669	4.62226e-09	2.29764e-07
ENSG00000182700	IGIP	1.07463	0.954619	1.1138	1.71906	1.89192	2.15155	0.989023	1.12201	1.33177	1.97096	2.06012	2.00246	0.872886	1.83132	1.11432e-05	0.000278636	4.95299	0.100088	1.07184	0.502603	0.716859	0.96357	1.95013	3.03256e-06	3.61168e-05
ENSG00000070413	DGCR2	6.05537	5.93969	5.80365	6.59274	6.4489	6.31315	5.99813	5.93938	5.81733	6.44723	6.53352	6.31111	0.518673	1.43264	1.11557e-05	0.000278636	4.9525	-0.0149364	0.9897	0.865571	0.954015	0.497827	1.41209	1.79185e-05	0.000153568
ENSG00000196396	PTPN1	6.49365	6.4697	6.41932	6.85246	6.84671	6.78483	6.6228	6.69507	6.58532	6.92518	6.88312	6.78009	0.367091	1.28975	1.1225e-05	0.000279905	4.94981	0.173411	1.12772	0.0107603	0.0536986	0.402102	1.32143	3.4995e-06	4.03468e-05
ENSG00000116191	RALGPS2	5.80217	5.65971	6.10053	6.54108	6.53058	6.73195	5.58334	5.82154	5.77437	6.11355	6.14136	6.301	0.747472	1.67885	1.129e-05	0.000281063	4.94731	-0.127069	0.91569	0.33191	0.563882	0.331346	1.25819	0.0162719	0.0414062
ENSG00000035687	ADSS	6.20841	6.22475	6.25925	6.53085	6.59291	6.73421	5.9767	5.97033	5.9294	6.40197	6.44569	6.32417	0.388411	1.30895	1.13791e-05	0.000282818	4.94389	-0.271963	0.828192	0.000662272	0.00653008	0.160053	1.11733	0.0231434	0.0551999
ENSG00000163349	HIPK1	6.857	6.63458	6.88694	5.80383	5.94081	5.81963	6.77593	7.0344	7.03226	5.97723	5.96655	6.27828	-0.937807	0.522026	1.15468e-05	0.000286447	4.93754	0.155046	1.11346	0.304886	0.536487	-0.719231	0.607421	0.000188383	0.00105546
ENSG00000070444	MNT	3.86083	3.5345	3.7565	4.31246	4.3272	4.18915	4.20153	4.19527	4.30998	4.45817	4.43751	4.35739	0.559465	1.47372	1.15629e-05	0.000286447	4.93693	0.518695	1.43266	2.89553e-05	0.000587672	0.701026	1.62566	5.56629e-07	9.28389e-06
ENSG00000165630	PRPF18	4.66017	4.78908	4.69811	4.10276	4.23636	4.35693	4.94433	4.99211	5.04031	4.5082	4.53854	4.73406	-0.484194	0.714896	1.18103e-05	0.000292097	4.92774	0.276397	1.21117	0.00196278	0.0152438	-0.123008	0.918271	0.130351	0.224522
ENSG00000102359	SRPX2	2.33843	2.19775	2.30751	2.85425	2.79746	3.14928	2.29575	2.07556	2.44287	2.80735	2.67458	2.76085	0.652165	1.57152	1.21297e-05	0.000299509	4.91615	-0.00959708	0.99337	0.932535	0.989482	0.466523	1.38178	0.000471886	0.00223781
ENSG00000183762	KREMEN1	5.17552	5.04868	5.01108	5.63487	5.51636	5.53939	5.00265	5.05516	5.25137	5.42898	5.34852	5.39159	0.485046	1.39963	1.22439e-05	0.00030136	4.91208	0.0246541	1.01724	0.767328	0.897851	0.311179	1.24072	0.00122639	0.00492768
ENSG00000170264	FAM161A	4.00969	3.92695	4.112	3.27293	3.08547	3.4466	3.28815	3.40072	3.50215	2.34688	2.38042	2.65938	-0.747834	0.595497	1.22444e-05	0.00030136	4.91206	-0.618715	0.651251	9.38662e-05	0.0014641	-1.55452	0.340441	9.93281e-10	7.8016e-08
ENSG00000115368	WDR75	7.28807	7.36046	7.32628	6.93745	7.07184	7.05633	7.1666	7.13058	7.11575	6.83313	6.82867	6.90067	-0.303146	0.810483	1.23256e-05	0.000302865	4.90919	-0.187332	0.878228	0.00153965	0.0125972	-0.470935	0.721497	3.71831e-08	1.1163e-06
ENSG00000123219	CENPK	3.76961	3.6724	3.91156	3.02293	3.15996	3.31574	3.13465	3.18349	2.78825	2.59639	2.65347	2.49875	-0.618205	0.651481	1.23844e-05	0.000303735	4.90712	-0.748853	0.595077	1.2508e-06	4.84996e-05	-1.20086	0.435015	2.19066e-09	1.35011e-07
ENSG00000124641	MED20	5.44092	5.44659	5.60575	5.05699	5.16697	5.07784	5.6602	5.63369	5.66553	5.13698	5.09757	5.21384	-0.39688	0.759499	1.2401e-05	0.000303735	4.90654	0.155656	1.11393	0.025481	0.100394	-0.348282	0.785519	5.20902e-05	0.000367491
ENSG00000029993	HMGB3	6.76805	6.79488	6.65385	7.17856	7.20298	7.16992	6.63077	6.64894	6.4753	6.96909	6.97562	6.73875	0.444731	1.36106	1.24636e-05	0.000304776	4.90436	-0.154172	0.898648	0.056244	0.174844	0.155856	1.11408	0.0506908	0.104924
ENSG00000099219	ERMP1	6.68767	6.61696	6.71358	7.01856	7.07595	6.98622	6.54731	6.61657	6.59914	6.91391	7.02108	6.92488	0.354314	1.27838	1.25047e-05	0.000305061	4.90293	-0.0849369	0.942826	0.172361	0.375145	0.280698	1.21478	0.000167039	0.000952039
ENSG00000205572	SERF1B	4.30098	4.48455	4.45998	3.85344	3.77827	4.00887	4.75019	4.67089	4.60162	4.22906	4.12864	4.36613	-0.535177	0.690074	1.25261e-05	0.000305061	4.90218	0.259016	1.19666	0.00656728	0.0376149	-0.174408	0.886131	0.0581836	0.117163
ENSG00000004897	CDC27	7.69589	7.62041	7.70484	8.04967	8.09235	8.11356	7.54323	7.62151	7.51245	7.75722	7.81818	7.83754	0.41151	1.33008	1.25357e-05	0.000305061	4.90185	-0.114599	0.923639	0.115846	0.285816	0.130559	1.09472	0.0736618	0.142067
ENSG00000001036	FUCA2	6.15186	6.18114	6.0772	6.57882	6.62792	6.56221	5.9917	5.8855	5.92886	6.54689	6.57572	6.41091	0.452813	1.36871	1.26744e-05	0.000307943	4.89707	-0.201536	0.869624	0.0180653	0.078307	0.374618	1.2965	0.000108251	0.000668782
ENSG00000124191	TOX2	4.42356	4.38067	4.19358	4.75583	4.81935	4.6728	4.23943	4.13045	4.22789	4.66984	4.663	4.60527	0.416441	1.33463	1.3038e-05	0.000316018	4.88479	-0.133758	0.911454	0.0789766	0.220682	0.313225	1.24248	0.000296726	0.00153276
ENSG00000117620	SLC35A3	4.30745	4.39109	4.75076	5.1395	5.15758	5.39159	4.30797	4.49689	4.53957	4.8617	4.91793	5.17162	0.746962	1.67826	1.30484e-05	0.000316018	4.88444	-0.0340289	0.976689	0.79638	0.914275	0.500542	1.41475	0.000918256	0.00388043
ENSG00000175166	PSMD2	9.39089	9.29768	9.30393	9.06409	9.01321	8.9995	9.2887	9.21569	9.37779	9.04216	9.02359	8.91136	-0.305219	0.809319	1.31172e-05	0.000317177	4.88216	-0.0367548	0.974845	0.474629	0.696407	-0.338306	0.79097	3.68463e-06	4.19075e-05
ENSG00000100567	PSMA3	7.49535	7.68553	7.62041	7.06605	7.11575	7.16085	7.51553	7.45028	7.34699	7.16264	7.19755	7.08221	-0.4863	0.713853	1.32752e-05	0.000320485	4.87696	-0.162911	0.893221	0.0569723	0.176493	-0.452822	0.730613	2.94068e-05	0.000229458
ENSG00000183077	AFMID	5.17295	5.35455	5.10274	4.7058	4.6068	4.70487	5.11653	5.04881	5.03624	4.78541	4.59838	4.57818	-0.537997	0.688726	1.33093e-05	0.000320798	4.87585	-0.143308	0.905441	0.118247	0.289532	-0.555962	0.680203	8.74001e-06	8.53785e-05
ENSG00000198929	NOS1AP	2.71043	2.48645	2.48645	3.40448	3.35633	3.51023	2.5317	2.31447	3.04517	3.25691	3.2982	3.21659	0.862309	1.81794	1.33973e-05	0.000322406	4.87298	0.069584	1.04941	0.649502	0.823504	0.696196	1.62023	0.000155511	0.000899541
ENSG00000134262	AP4B1	4.60868	4.50131	4.53238	4.12864	4.20438	4.01151	4.32766	4.3411	4.33058	4.05712	4.01266	4.02321	-0.432413	0.741021	1.34427e-05	0.000322986	4.87151	-0.21433	0.861947	0.00755001	0.0417606	-0.516377	0.699125	1.50824e-06	2.06108e-05
ENSG00000100242	SUN2	5.32019	5.26248	5.23618	5.77296	5.67538	5.61074	5.17949	5.22219	5.03671	5.67253	5.63247	5.52384	0.413476	1.33189	1.36566e-05	0.000327607	4.86466	-0.126978	0.915748	0.0906461	0.241843	0.336931	1.26307	0.0001354	0.000804656
ENSG00000154319	FAM167A	1.65338	1.74675	1.46966	1.18282	0.916563	0.94312	2.16642	2.14154	2.10551	1.52346	1.51141	1.52752	-0.609248	0.655538	1.37047e-05	0.000328242	4.86313	0.514303	1.4283	6.25553e-05	0.00105192	-0.102704	0.931286	0.319137	0.45219
ENSG00000196417	ZNF765	3.10921	2.71663	3.20111	3.80217	3.91156	3.96503	3.22801	3.4099	3.4507	3.94327	3.99832	4.19203	0.884527	1.84616	1.40009e-05	0.000334444	4.85384	0.354799	1.27881	0.0325618	0.119359	1.03554	2.04988	1.69113e-06	2.25697e-05
ENSG00000180815	MAP3K15	0.775863	0.457125	1.00436	1.4809	1.51094	1.83049	0.613334	0.337879	0.818779	1.27688	1.17263	0.98378	0.86175	1.81724	1.40078e-05	0.000334444	4.85363	-0.155436	0.897861	0.305524	0.537299	0.399251	1.31882	0.0136447	0.0358087
ENSG00000150403	TMCO3	5.23526	5.28205	5.28079	5.58213	5.5918	5.62144	5.26271	5.27639	5.14559	5.73291	5.63106	5.65419	0.332402	1.25911	1.40565e-05	0.00033508	4.85212	-0.037859	0.974099	0.512249	0.724512	0.40682	1.32576	1.02869e-06	1.50978e-05
ENSG00000107331	ABCA2	4.99268	4.89178	5.03481	5.62325	5.55474	5.4191	5.10046	4.9217	4.95308	5.68771	5.76547	5.5024	0.559681	1.47394	1.41469e-05	0.000336706	4.84934	0.0187995	1.01312	0.84744	0.943945	0.679475	1.60156	1.12354e-06	1.63317e-05
ENSG00000181885	CLDN7	6.5886	6.69341	6.59208	7.18229	7.06251	7.04382	6.63611	6.51637	6.47182	7.13236	7.17286	7.2432	0.471492	1.38654	1.42083e-05	0.000337636	4.84746	-0.0834307	0.943811	0.314908	0.547325	0.557828	1.47205	1.64224e-06	2.20678e-05
ENSG00000120805	ARL1	6.73041	6.79945	6.748	6.35016	6.43137	6.39914	6.8295	6.85603	6.76358	6.43729	6.50412	6.69155	-0.365797	0.77604	1.42658e-05	0.000338472	4.8457	0.0570054	1.0403	0.355489	0.586459	-0.21551	0.861241	0.00240035	0.0085567
ENSG00000114270	COL7A1	1.27856	1.25568	1.46129	0.568175	0.260166	0.615242	1.54401	1.73985	1.5517	0.636705	0.783193	1.11902	-0.850546	0.554575	1.43216e-05	0.000339266	4.84401	0.280156	1.21433	0.0590735	0.180971	-0.48585	0.714076	0.00305021	0.010453
ENSG00000164078	MST1R	5.08311	5.05566	5.08148	5.70659	5.56628	5.55976	5.0595	4.90426	4.83999	5.51951	5.4425	5.36603	0.537604	1.45156	1.44133e-05	0.000340077	4.84124	-0.138926	0.908195	0.154647	0.34916	0.369638	1.29203	0.000755175	0.00330043
ENSG00000113356	POLR3G	6.78152	6.82406	7.00054	6.3128	6.4206	6.5177	6.62581	6.60921	6.53424	6.18408	6.17366	6.09061	-0.451585	0.731239	1.44471e-05	0.000340077	4.84022	-0.278749	0.824306	0.00168866	0.0135675	-0.71881	0.607598	3.41508e-08	1.04598e-06
ENSG00000183840	GPR39	3.26875	3.39938	2.88084	3.91017	4.00487	3.90677	2.94739	2.93272	3.07652	3.91911	3.84723	3.84841	0.75666	1.68957	1.44603e-05	0.000340077	4.83982	-0.198346	0.871549	0.15894	0.35557	0.687776	1.6108	4.40378e-05	0.000321608
ENSG00000144645	OSBPL10	5.33796	5.21674	5.30702	5.67583	5.68437	5.65894	4.93343	4.96997	5.16514	5.34454	5.36687	5.34869	0.38593	1.3067	1.44641e-05	0.000340077	4.83971	-0.264144	0.832693	0.00101916	0.00913928	0.066236	1.04698	0.325568	0.459385
ENSG00000188493	C19orf54	3.08949	3.12742	2.85168	3.92335	3.66011	3.44428	3.24117	3.34588	3.30745	3.84723	3.76312	3.6165	0.65309	1.57253	1.4468e-05	0.000340077	4.83959	0.274814	1.20984	0.0250513	0.0991393	0.719599	1.64672	4.05126e-06	4.54635e-05
ENSG00000011028	MRC2	1.02523	0.925159	1.01388	1.69645	1.6205	1.63943	1.16829	1.02684	1.17002	2.00625	1.71729	1.60714	0.664107	1.58459	1.44964e-05	0.000340217	4.83874	0.133681	1.09709	0.251476	0.477194	0.789475	1.72845	1.55779e-06	2.11429e-05
ENSG00000111711	GOLT1B	5.24124	5.36252	5.49514	5.91454	5.86374	6.17549	5.72877	5.6517	5.60667	5.94643	6.01791	6.36342	0.618315	1.53508	1.45969e-05	0.000342046	4.83574	0.296296	1.22799	0.0117007	0.0572427	0.74235	1.6729	1.35437e-06	1.91723e-05
ENSG00000126067	PSMB2	8.25906	8.35614	8.22884	7.88353	7.87303	7.86639	8.29337	8.26847	8.13743	8.00477	7.9601	7.79947	-0.40712	0.754127	1.46541e-05	0.000342366	4.83404	-0.0484044	0.967005	0.482507	0.702786	-0.359692	0.779331	5.81619e-05	0.000402094
ENSG00000116990	MYCL1	2.40477	2.5489	2.56686	1.84802	1.70968	1.71344	2.05102	2.19192	2.22831	1.91415	1.27688	1.77181	-0.74962	0.59476	1.46575e-05	0.000342366	4.83394	-0.34958	0.784813	0.011281	0.0556019	-0.852517	0.553818	3.08657e-06	3.65875e-05
ENSG00000213066	FGFR1OP	5.01704	5.02769	5.1955	4.57367	4.6068	4.74601	4.84072	5.03481	4.84477	4.62009	4.68025	4.6747	-0.437816	0.738251	1.46783e-05	0.000342366	4.83332	-0.173008	0.886992	0.0280038	0.10691	-0.421538	0.746628	2.17434e-05	0.000178867
ENSG00000198783	ZNF830	3.78903	4.03789	3.91979	3.42037	3.46413	3.22397	3.91469	3.86946	3.88388	3.37495	3.18846	3.50477	-0.545917	0.684956	1.47143e-05	0.000342678	4.83226	-0.0263654	0.981891	0.768568	0.898331	-0.560237	0.678191	1.04735e-05	9.89956e-05
ENSG00000150054	MPP7	6.06403	6.03469	6.30376	6.63832	6.68564	6.76488	6.00901	5.80194	5.86544	6.2487	6.29487	6.34686	0.562384	1.47671	1.4771e-05	0.000343471	4.83059	-0.241727	0.845732	0.0239949	0.0963671	0.162822	1.11947	0.106803	0.192126
ENSG00000113580	NR3C1	4.92311	4.74932	4.84704	5.2668	5.29782	5.23827	4.78161	4.95719	5.03002	5.02438	5.0521	5.20974	0.427959	1.34533	1.48843e-05	0.00034533	4.82727	0.0833723	1.05949	0.270449	0.498482	0.255178	1.19348	0.00253573	0.00896554
ENSG00000124380	SNRNP27	5.4117	5.52898	5.58203	5.02749	5.11278	5.23083	5.59006	5.5644	5.6515	5.29449	5.34565	5.34062	-0.383953	0.766335	1.48965e-05	0.00034533	4.82692	0.094584	1.06776	0.149911	0.341853	-0.180606	0.882332	0.0111161	0.0301811
ENSG00000148411	NACC2	5.4879	5.41651	5.35179	6.01211	5.95761	5.73538	6.10858	6.15475	5.95552	6.47003	6.55602	6.48886	0.483077	1.39772	1.49557e-05	0.000346173	4.82519	0.65401	1.57354	2.75928e-07	1.47821e-05	1.08611	2.12301	1.06264e-10	1.51987e-08
ENSG00000066468	FGFR2	3.94472	3.80373	3.84909	4.39791	4.46651	4.47115	3.78132	3.67349	3.96252	4.06242	4.14318	4.35802	0.579298	1.49412	1.50362e-05	0.000347505	4.82286	-0.0599026	0.959329	0.562542	0.762308	0.321133	1.24931	0.00458104	0.0145849
ENSG00000184500	PROS1	4.04798	3.93768	4.02481	4.39791	4.43356	4.54152	4.03592	4.021	3.96528	4.49759	4.46906	4.52731	0.454124	1.36995	1.50871e-05	0.000348093	4.82139	0.00399129	1.00277	0.960069	1	0.494499	1.40883	5.00879e-06	5.38188e-05
ENSG00000155329	ZCCHC10	5.13391	5.25508	5.32932	4.56069	4.57209	4.74269	5.30222	5.25289	5.28362	4.70436	4.72413	4.92239	-0.614337	0.65323	1.51075e-05	0.000348093	4.82081	0.0403131	1.02834	0.688922	0.850272	-0.456302	0.728852	0.00031898	0.00162885
ENSG00000116199	FAM20B	6.12826	6.04849	6.20946	5.64739	5.74947	5.67398	6.02174	6.12385	6.1035	5.59842	5.72924	5.66888	-0.438264	0.738022	1.53862e-05	0.000353975	4.81287	-0.0454799	0.968967	0.538035	0.743128	-0.463113	0.725419	7.81442e-06	7.76373e-05
ENSG00000088992	TESC	3.49978	3.47174	3.32268	4.1876	3.97705	4.03561	3.50124	3.33898	3.36676	3.909	3.86729	3.7011	0.635164	1.55311	1.55075e-05	0.000355826	4.80946	-0.0294741	0.979777	0.794959	0.913751	0.394739	1.31471	0.00196766	0.00729201
ENSG00000099942	CRKL	7.76443	7.60745	7.62935	7.30547	7.32956	7.23931	7.74741	7.78011	7.77091	7.42613	7.448	7.54418	-0.375588	0.770791	1.55201e-05	0.000355826	4.80911	0.0990591	1.07107	0.129563	0.30861	-0.194509	0.87387	0.00642827	0.0192531
ENSG00000074416	MGLL	2.75064	2.81485	2.53777	3.27293	3.45528	3.21821	2.55125	2.5124	2.56415	3.10622	3.05857	2.82262	0.614039	1.53054	1.5537e-05	0.000355826	4.80863	-0.158966	0.895667	0.160665	0.358077	0.295087	1.22696	0.0120478	0.0322543
ENSG00000138685	FGF2	4.68762	4.69091	4.85619	4.15011	4.06294	4.19822	4.54152	4.57684	4.63158	3.79015	3.91017	4.04317	-0.607584	0.656295	1.55922e-05	0.000356454	4.80709	-0.161201	0.894281	0.122177	0.296656	-0.830831	0.562206	3.33794e-07	6.12669e-06
ENSG00000254827	SLC22A18AS	-0.161119	-0.27037	-0.19881	0.58986	0.378466	0.484638	-0.309197	-0.265385	-0.25836	0.100888	0.0281814	-0.0370583	0.69446	1.61828	1.56115e-05	0.000356454	4.80656	-0.0675209	0.954276	0.576131	0.77237	0.240889	1.18172	0.0565381	0.114488
ENSG00000178202	KDELC2	5.19198	5.07504	5.07254	5.62618	5.60725	5.68609	4.57196	4.65564	4.25291	5.09196	5.17087	4.90064	0.52653	1.44046	1.5635e-05	0.000356456	4.8059	-0.619977	0.650681	4.91475e-06	0.000147258	-0.0581369	0.960504	0.532266	0.664336
ENSG00000156502	SUPV3L1	6.20496	6.29818	6.33857	5.90587	6.00716	5.86724	6.26788	6.22664	6.28783	6.04725	6.03329	6.00297	-0.353667	0.782592	1.58145e-05	0.000359693	4.80094	-0.0196911	0.986444	0.74149	0.882189	-0.252558	0.839407	0.000513369	0.00238895
ENSG00000139826	ABHD13	4.48928	4.46672	4.38796	3.69304	3.92489	3.8223	4.62237	4.63696	4.49494	4.16706	4.01413	4.32233	-0.634849	0.644008	1.58245e-05	0.000359693	4.80067	0.136496	1.09923	0.195806	0.408732	-0.28099	0.823026	0.0149967	0.038707
ENSG00000178053	MLF1	5.03418	5.23229	5.2266	4.65691	4.71617	4.78668	5.09043	4.99313	5.01683	4.75681	4.74788	4.70286	-0.444514	0.734832	1.59471e-05	0.000361937	4.79732	-0.130857	0.913289	0.0927337	0.245836	-0.428272	0.743152	2.34249e-05	0.000190631
ENSG00000107036	KIAA1432	5.64593	5.50912	5.75629	6.19535	6.2217	6.30264	5.81308	5.95603	5.99306	6.23748	6.3091	6.5107	0.603019	1.51889	1.60769e-05	0.000364338	4.7938	0.284013	1.21758	0.0135422	0.0638411	0.715087	1.64158	1.78406e-06	2.35816e-05
ENSG00000117877	CD3EAP	5.38524	5.47078	5.23248	6.07433	6.04757	5.8622	5.16359	4.98246	5.2126	5.9047	5.60998	5.38055	0.631682	1.54937	1.62406e-05	0.000367499	4.7894	-0.243608	0.84463	0.0430676	0.145357	0.269582	1.20546	0.0232776	0.0554456
ENSG00000247626	MARS2	5.33373	5.04669	5.08062	4.6747	4.72686	4.69575	5.05807	5.12608	5.01407	4.79158	4.72113	4.72385	-0.454651	0.729687	1.62808e-05	0.000367858	4.78832	-0.087705	0.941019	0.25857	0.485892	-0.408074	0.753629	5.20114e-05	0.000367107
ENSG00000123892	RAB38	4.01819	4.14638	4.30418	4.53444	4.6103	4.70838	3.99439	3.86946	4.01078	4.4806	4.47881	4.43288	0.461653	1.37712	1.63629e-05	0.000368028	4.78614	-0.197617	0.87199	0.0267406	0.103528	0.3084	1.23833	0.00107433	0.00440809
ENSG00000188690	UROS	4.80599	4.77639	4.77336	5.33214	5.33676	5.3659	4.70405	4.63439	4.44236	5.45646	5.387	5.12989	0.559633	1.47389	1.63647e-05	0.000368028	4.78609	-0.191838	0.875489	0.0691656	0.202008	0.540001	1.45397	2.44275e-05	0.000197729
ENSG00000125864	BFSP1	2.31708	2.32044	2.32387	3.19002	3.01388	3.03205	2.4027	1.97126	1.86504	3.23712	2.95283	3.03433	0.758339	1.69154	1.63746e-05	0.000368028	4.78583	-0.241053	0.846127	0.0936221	0.247456	0.754711	1.68729	1.6794e-05	0.000145411
ENSG00000162174	ASRGL1	4.43033	4.49402	4.35089	3.93833	3.94542	3.90633	4.28422	4.27482	4.17592	3.90216	3.9676	3.69981	-0.495274	0.709427	1.63854e-05	0.000368028	4.78554	-0.18044	0.882434	0.0415201	0.141712	-0.568076	0.674516	3.11676e-06	3.68195e-05
ENSG00000130147	SH3BP4	6.16474	6.01748	5.94172	6.53485	6.47657	6.41582	6.0329	6.10664	6.12359	6.3514	6.34779	6.28414	0.434371	1.35132	1.64583e-05	0.000369118	4.78362	0.0462796	1.0326	0.543842	0.748474	0.286457	1.21964	0.00117971	0.0047695
ENSG00000152620	NADKD1	4.3019	4.28825	4.15037	4.61685	4.75285	4.62079	4.13945	4.23301	4.2225	4.37944	4.42934	4.38568	0.416409	1.3346	1.68033e-05	0.000376299	4.77461	-0.0487611	0.966766	0.511618	0.724108	0.151049	1.11038	0.0497102	0.103198
ENSG00000254901	MEF2BNB	2.63059	2.91871	2.76208	2.06759	1.89192	2.25518	2.66257	2.63278	2.3971	2.41141	2.20221	2.30446	-0.699309	0.615867	1.69136e-05	0.000378211	4.77176	-0.206639	0.866554	0.0904856	0.241759	-0.464461	0.724742	0.000949995	0.00399245
ENSG00000087095	NLK	4.33082	4.34296	4.39615	3.7505	3.77972	3.92419	4.32307	4.4808	4.4884	3.71102	3.65346	3.90008	-0.538621	0.688429	1.69778e-05	0.000379088	4.77012	0.0743317	1.05287	0.407353	0.636819	-0.602369	0.658671	4.41411e-06	4.85296e-05
ENSG00000256916	RP11-817J15.2	0.0373987	-0.308178	-0.300797	0.718752	0.586139	0.569201	-0.71202	-0.0706116	-0.568738	0.126572	0.0671297	-0.0703631	0.815236	1.75959	1.70838e-05	0.000380894	4.76741	-0.259957	0.835113	0.0823056	0.226735	0.231759	1.17427	0.115313	0.203774
ENSG00000179178	TMEM125	1.97966	2.31447	2.41361	3.17409	2.92606	3.19639	2.65867	2.42953	2.60348	3.23294	3.25205	3.52518	0.863117	1.81896	1.7358e-05	0.000386439	4.7605	0.328266	1.2555	0.0443716	0.148013	1.10015	2.14377	6.54912e-07	1.06194e-05
ENSG00000108883	EFTUD2	8.27481	8.24902	8.13185	7.89379	7.89132	7.85925	8.13185	8.07947	8.08748	7.85172	7.85738	7.66296	-0.337201	0.791576	1.73993e-05	0.00038679	4.75947	-0.119089	0.920769	0.0515807	0.1646	-0.427689	0.743452	8.93895e-07	1.35253e-05
ENSG00000232833	FAM27E3	0.976513	1.15333	0.996202	0.445559	0.084259	0.387913	1.01205	0.813972	0.945834	0.410272	0.133333	0.503502	-0.736197	0.60032	1.74467e-05	0.000387277	4.75829	-0.118148	0.92137	0.352433	0.584152	-0.693215	0.618474	3.42318e-05	0.000260275
ENSG00000075131	TIPIN	5.27539	5.30075	5.14387	4.73406	4.88649	4.66715	4.44017	4.44148	4.24255	4.01413	4.05898	3.80842	-0.477557	0.718193	1.76095e-05	0.000390318	4.75425	-0.865673	0.54879	8.3713e-09	9.99349e-07	-1.27901	0.412078	3.0507e-11	6.25023e-09
ENSG00000115758	ODC1	9.56278	9.56977	9.42155	9.09891	9.23856	9.084	9.46916	9.48468	9.39089	9.05575	9.0712	9.02359	-0.377637	0.769698	1.76549e-05	0.000390753	4.75314	-0.069936	0.95268	0.287565	0.516561	-0.467929	0.723002	1.2343e-06	1.76873e-05
ENSG00000135821	GLUL	7.75539	7.74623	7.66821	7.4512	7.4146	7.40453	7.84737	7.83636	7.93331	7.50322	7.43741	7.5973	-0.299883	0.812318	1.78144e-05	0.000393709	4.74923	0.149022	1.10882	0.00867953	0.0459303	-0.210896	0.864	0.000660171	0.00294032
ENSG00000182952	HMGN4	6.73803	6.8126	6.81046	6.18521	6.30985	6.40589	6.90537	6.85986	6.98689	6.37788	6.34913	6.6332	-0.48686	0.713577	1.78773e-05	0.000394524	4.7477	0.1304	1.0946	0.124593	0.300453	-0.334175	0.793238	0.000790803	0.00342847
ENSG00000133466	C1QTNF6	3.13437	3.215	3.03674	4.08492	3.90537	3.77391	2.64726	2.72022	2.70348	3.66175	3.54633	3.10059	0.792739	1.73236	1.79181e-05	0.000394849	4.74671	-0.438675	0.737812	0.00799493	0.0433052	0.308973	1.23883	0.0397433	0.0859677
ENSG00000070190	DAPP1	0.0892545	0.0467934	0.845511	1.266	1.33974	1.73486	0.276405	0.668704	0.628124	1.54773	1.73742	1.93865	1.11988	2.17329	1.84478e-05	0.000405932	4.73405	0.19773	1.14689	0.324983	0.556915	1.41386	2.66449	8.75586e-07	1.33281e-05
ENSG00000119446	RBM18	5.99859	6.03508	6.14384	5.60447	5.67363	5.77719	6.34198	6.40859	6.31599	6.0832	6.09857	6.12385	-0.374058	0.771609	1.89413e-05	0.000416187	4.72259	0.296498	1.22816	0.000172533	0.00238883	0.0427861	1.0301	0.503931	0.63812
ENSG00000115649	CNPPD1	4.87316	4.85566	4.60527	4.22271	4.17823	4.17678	5.00848	4.99027	4.7741	4.49402	4.30871	4.3539	-0.585913	0.666228	1.93305e-05	0.000424125	4.71376	0.1456	1.10619	0.146122	0.336323	-0.392694	0.761706	0.000960349	0.00402539
ENSG00000132640	BTBD3	5.55933	5.57004	5.60017	5.03922	5.04009	5.13098	5.49636	5.66826	5.60998	4.84849	5.01386	5.24014	-0.506474	0.703941	1.94539e-05	0.000426215	4.71099	0.0151141	1.01053	0.860009	0.95111	-0.543309	0.686195	8.33584e-06	8.20115e-05
ENSG00000141574	SECTM1	1.64048	1.5681	1.51141	2.27876	2.20596	2.28956	1.43752	1.32083	1.29012	2.26685	2.12876	2.20729	0.684666	1.60733	1.95233e-05	0.000426782	4.70945	-0.223938	0.856225	0.0830237	0.228112	0.627631	1.54503	5.27092e-05	0.000370995
ENSG00000141429	GALNT1	6.77254	6.82139	6.83846	7.05758	7.13236	7.21243	6.70179	6.74178	6.69549	6.94352	6.99891	6.94632	0.323258	1.25115	1.95361e-05	0.000426782	4.70916	-0.0977424	0.934494	0.101271	0.261518	0.152181	1.11125	0.0141783	0.0369406
ENSG00000162517	PEF1	6.32704	6.43007	6.10858	5.71312	5.6515	5.60862	6.37039	6.20331	6.20767	5.83869	5.70232	5.51905	-0.631134	0.645669	1.98613e-05	0.000433262	4.70199	-0.028577	0.980387	0.789669	0.910309	-0.60162	0.659014	3.29721e-05	0.000252088
ENSG00000240875	RP11-392A22.2	0.405184	0.987328	0.517257	1.53572	1.59555	1.49319	0.784111	0.531497	0.157784	0.884066	1.16076	0.945834	0.904728	1.87219	1.99872e-05	0.000435383	4.69925	-0.14578	0.90389	0.372664	0.601596	0.360113	1.28353	0.035145	0.0778996
ENSG00000136444	RSAD1	5.47277	5.55385	5.47913	5.20237	5.01663	5.13488	5.7593	5.67126	5.74183	5.32321	5.30287	5.38302	-0.384024	0.766297	2.038e-05	0.000443301	4.6908	0.222123	1.16645	0.00291266	0.020491	-0.165808	0.891429	0.0208249	0.0506703
ENSG00000133460	SLC2A11	1.94066	1.86108	2.15692	2.70795	2.89798	2.56994	2.39558	2.26893	2.05835	2.93272	3.1658	2.85815	0.739701	1.66983	2.07358e-05	0.000450395	4.68328	0.25494	1.19329	0.068402	0.20024	1.00018	2.00025	3.57483e-07	6.45983e-06
ENSG00000086232	EIF2AK1	7.63038	7.60814	7.60814	7.84312	7.91242	7.87579	7.52947	7.49472	7.56005	7.71245	7.66996	7.75627	0.261547	1.19876	2.08862e-05	0.000453013	4.68014	-0.0874611	0.941178	0.0723215	0.207782	0.0972512	1.06973	0.0464783	0.0974764
ENSG00000168234	TTC39C	4.23427	4.25453	4.19099	4.57593	4.66652	4.74798	4.21652	4.07301	4.17271	4.52963	4.31674	4.40473	0.436563	1.35338	2.10698e-05	0.000456342	4.67634	-0.0726541	0.950887	0.364465	0.594823	0.190529	1.14118	0.0230895	0.0551526
ENSG00000106554	CHCHD3	6.05385	6.13727	6.20767	6.51219	6.60961	6.59147	5.98405	5.80442	5.96422	6.5278	6.44723	6.33752	0.438233	1.35494	2.12738e-05	0.000459618	4.67216	-0.215242	0.861401	0.0132993	0.0630096	0.30507	1.23548	0.000889851	0.00378324
ENSG00000137054	POLR1E	6.36895	6.45143	6.30771	6.04273	6.12317	5.96718	6.09599	6.04644	6.05011	5.77719	5.79616	5.72869	-0.331745	0.794575	2.12817e-05	0.000459618	4.67199	-0.312035	0.805505	4.23866e-05	0.000784644	-0.608725	0.655776	6.89418e-09	3.10156e-07
ENSG00000254087	LYN	5.96273	5.91626	5.98405	6.32921	6.25107	6.26137	5.76908	5.79436	5.82581	6.0752	6.0582	6.03231	0.326325	1.25382	2.17914e-05	0.000469957	4.66171	-0.157825	0.896375	0.014131	0.065738	0.101054	1.07256	0.0938976	0.172996
ENSG00000143321	HDGF	8.63941	8.63941	8.52412	8.99178	8.90672	9.00979	8.40806	8.27847	8.34185	8.79314	8.66609	8.51505	0.368329	1.29086	2.18788e-05	0.000471026	4.65998	-0.258304	0.83607	0.000967807	0.00884977	0.0573537	1.04056	0.384864	0.520814
ENSG00000157184	CPT2	4.9187	4.86797	4.60261	5.37171	5.29999	5.15192	5.22425	5.05658	5.19475	5.58649	5.58096	5.54117	0.477795	1.39261	2.19089e-05	0.000471026	4.65938	0.361552	1.28481	0.00043863	0.0048567	0.772683	1.70844	3.08069e-08	9.7712e-07
ENSG00000239332	AC016722.2	-0.305327	0.0875969	0.224994	0.65064	1.13679	0.773771	-0.266856	-0.195651	-0.617766	0.220138	0.153313	0.248633	0.851432	1.80429	2.19342e-05	0.000471026	4.65888	-0.362449	0.777843	0.0278294	0.106384	0.205015	1.1527	0.187436	0.299412
ENSG00000259943	RP1-39G22.7	2.27151	2.08879	2.13679	1.16615	1.13679	1.57154	1.75207	1.98225	1.83111	1.13955	1.23616	1.01603	-0.874401	0.54548	2.2301e-05	0.000478225	4.65168	-0.310531	0.806345	0.0526554	0.167115	-1.03494	0.488037	2.95894e-06	3.54073e-05
ENSG00000076513	ANKRD13A	4.17785	4.22208	4.16002	4.55178	4.62029	4.66526	4.19342	4.23163	4.22386	4.59394	4.54781	4.61487	0.425561	1.34309	2.24256e-05	0.000479643	4.64926	0.0295612	1.0207	0.701568	0.85785	0.398669	1.31829	4.63738e-05	0.000334956
ENSG00000168306	ACOX2	1.25496	1.55803	1.1948	2.37334	2.15718	2.29673	1.28731	1.19756	1.13459	2.21636	2.25152	1.55105	0.939621	1.91802	2.24598e-05	0.000479643	4.64859	-0.129697	0.914023	0.454946	0.679617	0.671833	1.5931	0.000782693	0.0033972
ENSG00000101871	MID1	6.19782	6.12659	6.45167	6.78567	6.81093	6.90331	6.46272	6.61696	6.74464	6.78152	6.80831	6.92183	0.574935	1.48961	2.24709e-05	0.000479643	4.64838	0.34995	1.27452	0.00288769	0.0203922	0.578676	1.49348	2.03464e-05	0.000170427
ENSG00000139323	POC1B	4.7609	4.79463	4.95946	4.20115	4.39011	4.40373	4.61338	4.73602	4.76571	4.11919	4.23459	4.44044	-0.506535	0.703911	2.2511e-05	0.000479643	4.64761	-0.132861	0.912021	0.139669	0.325546	-0.574224	0.671647	5.05383e-06	5.41589e-05
ENSG00000102743	SLC25A15	5.31674	5.3659	5.23337	4.96208	4.98072	4.84346	5.17275	5.2455	5.12815	4.9284	4.90882	4.8696	-0.376637	0.770231	2.25253e-05	0.000479643	4.64733	-0.123446	0.917992	0.0722456	0.207627	-0.403106	0.756229	9.91047e-06	9.47966e-05
ENSG00000126698	DNAJC8	7.33848	7.54958	7.38126	6.99506	7.06003	7.05194	7.36756	7.26118	7.21288	7.14569	7.12965	6.99379	-0.387587	0.764407	2.27047e-05	0.000482785	4.64388	-0.142749	0.905792	0.0471973	0.154508	-0.33324	0.793752	0.000114944	0.000704813
ENSG00000164104	HMGB2	8.35825	8.42364	8.31514	7.75764	7.78475	7.87303	8.00106	7.88353	7.57259	7.37507	7.33949	6.98548	-0.560692	0.677977	2.29159e-05	0.000486595	4.63986	-0.546843	0.684517	3.04018e-05	0.000602512	-1.13172	0.45637	2.02165e-09	1.30984e-07
ENSG00000172893	DHCR7	7.60814	7.64157	7.39391	8.09351	7.98346	7.90848	7.56664	7.62292	7.53617	8.02405	8.03246	7.9586	0.447131	1.36333	2.30306e-05	0.000488346	4.63769	0.0271112	1.01897	0.735307	0.878039	0.457025	1.37271	1.74733e-05	0.000150348
ENSG00000126878	AIF1L	5.97863	5.97074	5.87454	6.38939	6.40033	6.35319	5.50592	5.45977	5.45646	6.16105	6.17549	5.8484	0.439564	1.35619	2.3584e-05	0.000498482	4.62738	-0.467416	0.723259	1.88393e-05	0.00041156	0.12091	1.08742	0.137388	0.23438
ENSG00000198642	KLHL9	5.72892	5.71621	5.86819	5.05967	5.14352	5.17401	5.85974	6.0372	5.91523	4.99395	5.12709	5.4706	-0.645269	0.639374	2.36032e-05	0.000498482	4.62703	0.166514	1.12234	0.141037	0.327953	-0.574883	0.671341	7.89358e-05	0.000513868
ENSG00000105974	CAV1	8.659	8.56024	8.55694	9.05837	9.02007	8.91856	8.59915	8.54069	8.67877	8.82627	8.87315	8.70442	0.406987	1.32591	2.36073e-05	0.000498482	4.62695	0.0141473	1.00985	0.846118	0.943006	0.209385	1.15619	0.00915264	0.0256779
ENSG00000187514	PTMA	11.117	11.1412	11.2034	10.8402	10.9318	10.8624	10.7362	10.6827	10.7032	10.5071	10.5897	10.4334	-0.275633	0.826088	2.36747e-05	0.000499211	4.62571	-0.446419	0.733862	4.52228e-08	3.72621e-06	-0.643592	0.640117	1.89975e-10	2.22356e-08
ENSG00000174099	MSRB3	2.85042	2.6266	3.02293	3.30926	3.35522	3.42008	2.62465	2.60561	2.68399	3.17988	2.97062	3.01636	0.52873	1.44266	2.38048e-05	0.000500277	4.62333	-0.194535	0.873854	0.0600193	0.182832	0.223304	1.1674	0.0291728	0.0669324
ENSG00000133243	BTBD2	5.35179	5.18678	5.3419	6.18114	6.07081	5.81887	5.26922	5.15643	5.26922	6.07635	6.25197	5.77379	0.730614	1.65934	2.38238e-05	0.000500277	4.62299	-0.0616598	0.958161	0.647565	0.822425	0.741526	1.67194	1.94919e-05	0.000164267
ENSG00000163399	ATP1A1	9.31084	9.17784	9.16111	9.55004	9.54568	9.51585	9.29768	9.31535	9.43569	9.531	9.52327	9.49527	0.32057	1.24882	2.38243e-05	0.000500277	4.62298	0.132977	1.09655	0.0301603	0.112764	0.299922	1.23108	5.01717e-05	0.000357282
ENSG00000105221	AKT2	6.02909	6.07188	5.96886	6.39662	6.3185	6.30724	6.16653	6.11932	6.14136	6.4069	6.37519	6.39415	0.317448	1.24612	2.39116e-05	0.000501417	4.62139	0.118992	1.08598	0.0481728	0.156846	0.368688	1.29118	3.71382e-06	4.21763e-05
ENSG00000104221	BRF2	4.67741	4.8283	4.77677	4.15927	4.2988	4.19203	5.05378	5.03167	4.7784	4.57508	4.62905	4.57431	-0.544153	0.685794	2.40082e-05	0.00050241	4.61964	0.193583	1.1436	0.0470965	0.154251	-0.167998	0.890077	0.0862211	0.161587
ENSG00000163482	STK36	4.17416	3.95216	4.07973	3.50404	3.51119	3.55358	4.05556	4.11796	3.95463	3.41049	3.38405	3.45733	-0.545657	0.685079	2.40253e-05	0.00050241	4.61933	-0.0258897	0.982215	0.781544	0.905124	-0.65142	0.636653	2.92843e-06	3.51806e-05
ENSG00000138660	AP1AR	5.22051	5.23027	5.50623	5.71385	5.87343	5.96886	5.35577	5.43671	5.50395	5.72149	5.70856	5.84595	0.533318	1.44725	2.43191e-05	0.000507855	4.61405	0.11369	1.08199	0.248479	0.474398	0.439841	1.35646	0.000199116	0.00110336
ENSG00000081052	COL4A4	3.31427	3.19484	3.47508	4.07195	3.95687	4.21131	3.33483	3.70804	3.83544	3.89803	3.9217	4.33874	0.752258	1.68443	2.44305e-05	0.000509479	4.61207	0.29888	1.23019	0.0413234	0.141296	0.723797	1.65152	3.73642e-05	0.000279881
ENSG00000122882	ECD	5.56357	5.67889	5.66783	5.32037	5.33478	5.23827	5.60374	5.64517	5.55933	5.40225	5.28059	5.34587	-0.338833	0.79068	2.44859e-05	0.000509932	4.61108	-0.0340135	0.976699	0.567569	0.765698	-0.293775	0.815765	0.000111375	0.000685846
ENSG00000163877	SNIP1	4.69496	4.69954	4.67234	4.29458	4.26872	4.27387	4.81103	4.77882	4.85169	4.52171	4.53396	4.52911	-0.409926	0.752662	2.50253e-05	0.000520452	4.60162	0.124878	1.09042	0.0893617	0.239704	-0.160755	0.894557	0.0354448	0.078461
ENSG00000131724	IL13RA1	5.6466	5.59679	5.56959	5.93421	5.99619	6.022	5.55804	5.59448	5.60017	6.04205	6.03761	5.93255	0.379684	1.30106	2.51104e-05	0.000521505	4.60015	-0.0201367	0.986139	0.770184	0.899318	0.399927	1.31944	1.31935e-05	0.000120209
ENSG00000102057	KCND1	1.97584	1.62257	2.06721	1.23616	1.23956	1.09912	1.86001	1.95953	2.02943	1.25146	1.29671	1.56055	-0.696425	0.6171	2.54111e-05	0.000527029	4.59498	0.0616302	1.04364	0.6124	0.798331	-0.518898	0.697905	0.000510577	0.00237829
ENSG00000150527	CTAGE5	5.74703	5.778	5.89216	5.34931	5.30496	5.54368	5.69887	5.73699	5.76259	5.36616	5.45701	5.5588	-0.406456	0.754474	2.55636e-05	0.000528964	4.59238	-0.0727119	0.950849	0.314715	0.547116	-0.345324	0.787131	0.000141944	0.000835086
ENSG00000197256	KANK2	5.07099	5.11749	5.07611	5.53788	5.49386	5.37271	4.40065	4.42914	4.52861	4.72686	4.76823	4.71253	0.380064	1.3014	2.55742e-05	0.000528964	4.5922	-0.635363	0.643779	7.26378e-08	5.47694e-06	-0.352298	0.783335	9.19223e-05	0.000584823
ENSG00000100554	ATP6V1D	6.12183	6.25595	6.08009	5.64211	5.76608	5.73164	6.10369	6.17366	6.03821	5.89045	5.92728	5.79162	-0.439598	0.73734	2.56752e-05	0.000529797	4.59049	-0.0476674	0.967499	0.538046	0.743128	-0.282787	0.822002	0.00176853	0.00665823
ENSG00000105409	ATP1A3	4.15954	4.12814	3.93252	4.96109	4.55608	4.63796	3.84244	3.71384	3.6434	4.51588	4.76	4.3843	0.644834	1.56356	2.56844e-05	0.000529797	4.59033	-0.340733	0.78964	0.011811	0.0576702	0.480225	1.39496	0.000580931	0.00263855
ENSG00000156831	NSMCE2	5.20218	5.30976	5.27442	4.7366	4.72925	4.87619	5.31248	5.15758	4.99995	4.71188	4.83058	4.72983	-0.481639	0.716164	2.61145e-05	0.000537937	4.58312	-0.105648	0.929387	0.218949	0.439086	-0.504661	0.704826	1.48436e-05	0.000131758
ENSG00000166750	SLFN5	4.63949	4.56548	4.52226	5.25461	5.30441	5.12876	4.84477	4.99806	4.80599	5.30441	5.39982	5.46323	0.653551	1.57303	2.61803e-05	0.000538562	4.58203	0.307033	1.23716	0.0179321	0.077877	0.81294	1.75679	1.5752e-06	2.13039e-05
ENSG00000255717	SNHG1	6.32331	6.40859	6.58532	5.76288	5.79907	6.02136	6.2125	6.13554	6.06825	5.71918	5.63705	6.03959	-0.577937	0.669921	2.64704e-05	0.000543792	4.57724	-0.300106	0.812193	0.00825071	0.0442793	-0.640981	0.641277	7.8122e-06	7.76373e-05
ENSG00000159842	ABR	6.29788	6.25431	6.04018	6.73099	6.55459	6.61181	6.01986	5.94081	5.94629	6.44194	6.35924	6.35319	0.434763	1.35169	2.66437e-05	0.000546098	4.57441	-0.228805	0.853342	0.00990214	0.0506499	0.187169	1.13853	0.0268215	0.06233
ENSG00000145476	CYP4V2	2.98324	2.89881	2.69215	3.60207	3.59079	3.48721	2.98502	3.02975	2.76437	3.35076	3.33942	3.38384	0.701672	1.62639	2.66547e-05	0.000546098	4.57423	0.0677221	1.04806	0.605666	0.79399	0.499379	1.41361	0.000916353	0.00387419
ENSG00000073584	SMARCE1	7.83378	7.89379	7.7636	7.44961	7.50322	7.54218	7.76933	7.71961	7.66996	7.45591	7.42555	7.46811	-0.332222	0.794312	2.67088e-05	0.000546466	4.57335	-0.110904	0.926008	0.0734127	0.210002	-0.380684	0.768073	5.2295e-06	5.59129e-05
ENSG00000108679	LGALS3BP	8.21323	8.14488	8.12205	8.69047	8.52412	8.47951	8.32902	8.20187	8.27046	8.68585	8.78014	8.66141	0.404706	1.32382	2.68393e-05	0.000547959	4.57123	0.107011	1.07699	0.155542	0.350145	0.549112	1.46319	5.44533e-07	9.10217e-06
ENSG00000163536	SERPINI1	2.99702	3.01651	3.06271	2.41045	2.15288	2.51652	3.14862	3.07617	2.80366	2.6658	2.72813	2.63364	-0.665568	0.630441	2.6854e-05	0.000547959	4.57099	-0.0160602	0.98893	0.888349	0.966494	-0.349304	0.784963	0.00728469	0.0213211
ENSG00000122547	EEPD1	3.05201	2.89881	3.02781	3.52069	3.58701	3.51431	2.47774	2.42953	2.45516	3.07683	2.7339	2.91467	0.548008	1.46207	2.69791e-05	0.0005492	4.56897	-0.538562	0.688457	7.09075e-05	0.00117106	-0.0840149	0.943428	0.414277	0.550846
ENSG00000106031	HOXA13	2.50913	2.58273	2.46343	3.26655	3.18299	3.33366	1.80164	2.03443	2.23373	2.57593	2.63813	2.31094	0.742334	1.67288	2.70212e-05	0.0005492	4.5683	-0.495148	0.709489	0.00263489	0.0190291	-0.00944938	0.993472	0.945696	0.987173
ENSG00000182087	C19orf6	5.69593	5.69209	5.75443	6.14487	6.10587	6.02769	5.80497	5.71719	5.78156	6.21973	6.25565	6.13708	0.378848	1.3003	2.70235e-05	0.0005492	4.56826	0.0538444	1.03803	0.438359	0.664439	0.490298	1.40474	1.0148e-06	1.49228e-05
ENSG00000129055	ANAPC13	5.44371	5.44947	5.40994	5.85682	5.8855	5.7541	5.55933	5.5625	5.481	6.03545	5.99133	5.88141	0.397806	1.3175	2.70604e-05	0.000549215	4.56767	0.099802	1.07163	0.178987	0.385278	0.535276	1.44922	5.93803e-07	9.74313e-06
ENSG00000168615	ADAM9	8.00692	7.8717	7.94	8.40111	8.47696	8.40946	7.9601	7.9862	7.86492	8.30173	8.30857	8.30173	0.489678	1.40413	2.71752e-05	0.000550807	4.56583	-0.00246664	0.998292	0.97791	1	0.364509	1.28744	0.000584293	0.00264985
ENSG00000164574	GALNT10	6.78386	6.67507	6.71779	7.05368	7.04616	6.96241	6.85002	6.75806	6.84626	7.08149	7.02654	7.05967	0.295266	1.22711	2.73609e-05	0.00055383	4.56287	0.0925655	1.06626	0.0963319	0.25261	0.330359	1.25733	6.93435e-06	7.08913e-05
ENSG00000175898	S1PR2	2.19775	2.06972	2.17441	2.86684	2.7675	2.70461	2.71712	2.72022	2.85873	3.62738	3.56288	3.4068	0.632639	1.5504	2.74945e-05	0.000555792	4.56075	0.618272	1.53504	3.60734e-05	0.00068967	1.38586	2.61327	2.68188e-10	2.88368e-08
ENSG00000141034	GID4	3.60291	3.45325	3.72719	4.12388	4.21993	4.29178	3.78564	4.00259	4.10709	4.3841	4.36457	4.59672	0.617708	1.53444	2.75327e-05	0.000555823	4.56015	0.371362	1.29357	0.00378604	0.0249241	0.853791	1.80724	3.71327e-07	6.66236e-06
ENSG00000174456	C12orf76	2.81111	2.86552	2.63059	2.07371	2.22641	2.20729	3.13211	3.10769	3.24245	2.66038	2.58008	2.42365	-0.600454	0.659547	2.76222e-05	0.000556725	4.55874	0.39134	1.31161	0.00109924	0.00966885	-0.214156	0.86205	0.0539082	0.110282
ENSG00000167904	TMEM68	4.78961	4.78087	4.69694	4.20799	4.33239	4.31972	5.27571	5.25626	5.0789	4.81361	4.80523	4.99313	-0.469385	0.722272	2.76651e-05	0.000556725	4.55807	0.447525	1.3637	2.44442e-05	0.000506974	0.114121	1.08232	0.169633	0.276806
ENSG00000124171	PARD6B	3.87036	3.83346	4.1719	4.59	4.63516	4.7221	4.41006	4.52979	4.54178	4.93377	4.97367	5.35008	0.691049	1.61446	2.76875e-05	0.000556725	4.55772	0.536074	1.45002	0.000432968	0.0048397	1.12679	2.18372	3.18527e-08	1.0019e-06
ENSG00000236144	AD000090.2	3.23462	3.17604	3.31219	2.38115	2.52911	2.75491	3.01636	3.01325	2.95167	2.17806	1.93328	2.32285	-0.68605	0.621553	2.78298e-05	0.000558844	4.55549	-0.246987	0.842654	0.0514913	0.164444	-1.09653	0.467639	8.6712e-08	2.1068e-06
ENSG00000229835	KHSRPP1	1.32224	1.14352	0.772929	1.85782	1.80237	1.67513	0.784111	1.07463	1.10133	1.28608	1.3432	1.16792	0.698727	1.62307	2.79775e-05	0.000561067	4.55319	-0.0930919	0.937511	0.470973	0.693399	0.186052	1.13765	0.155823	0.258683
ENSG00000099875	MKNK2	6.84539	6.87437	6.75057	6.54651	6.39453	6.35065	7.30319	7.34048	7.27644	6.97047	6.99725	7.0146	-0.392895	0.7616	2.80682e-05	0.000562142	4.55179	0.483096	1.39774	1.42481e-06	5.40037e-05	0.170443	1.1254	0.0222117	0.0534611
ENSG00000107819	SFXN3	5.27931	5.30417	5.20325	5.7483	5.62161	5.66319	5.37219	5.35284	5.44092	5.79184	5.61133	5.79272	0.415342	1.33362	2.82009e-05	0.000564055	4.54974	0.12628	1.09148	0.10882	0.275153	0.469434	1.38457	6.21107e-06	6.4517e-05
ENSG00000196476	C20orf96	3.17452	3.21883	3.18435	2.62603	2.71357	2.73901	3.03938	2.80999	3.00408	2.72813	2.86157	2.82997	-0.499857	0.707177	2.83126e-05	0.000565543	4.54802	-0.241468	0.845884	0.0129873	0.0620744	-0.386261	0.76511	0.000378591	0.0018727
ENSG00000096746	HNRNPH3	7.89379	7.84037	7.93617	7.42903	7.59066	7.56911	7.85491	7.7815	7.90927	7.49806	7.51592	7.45239	-0.360491	0.778899	2.86309e-05	0.000569971	4.54316	-0.0414458	0.971681	0.521248	0.731456	-0.40115	0.757254	8.06158e-06	7.96232e-05
ENSG00000247092	SNHG10	2.89207	3.21413	3.09081	2.19192	2.44673	2.41045	2.76295	2.65643	2.60848	2.29964	2.25865	1.9149	-0.71624	0.608682	2.86452e-05	0.000569971	4.54295	-0.389902	0.763181	0.00602954	0.0351687	-0.907027	0.533283	1.76942e-06	2.34085e-05
ENSG00000123600	METTL8	4.77096	4.72357	4.71556	5.05325	5.14962	5.20311	5.14204	5.06514	5.15718	5.38504	5.36972	5.42661	0.398447	1.31809	2.86498e-05	0.000569971	4.54288	0.384732	1.30562	4.29806e-05	0.000792735	0.656935	1.57673	3.29886e-08	1.0291e-06
ENSG00000100890	KIAA0391	6.0757	6.3185	6.16249	5.75672	5.83694	5.78914	6.12056	6.02688	5.96037	5.77499	5.78914	5.69999	-0.391441	0.762368	2.86847e-05	0.000569971	4.54235	-0.149829	0.901357	0.04336	0.145909	-0.430807	0.741847	9.22219e-06	8.93404e-05
ENSG00000259781	RP11-673C5.1	7.21288	7.31498	7.09346	6.63489	6.77283	6.84451	6.99804	6.88999	6.93576	6.5886	6.51884	6.28574	-0.456733	0.728634	2.90424e-05	0.000576037	4.53697	-0.266086	0.831572	0.00413396	0.0266136	-0.74233	0.597773	6.04848e-08	1.58105e-06
ENSG00000255046	RP11-297N6.4	-0.187906	-0.32744	-0.178575	0.338368	0.446923	0.5349	-0.33327	-0.425779	-0.128634	0.547517	0.251715	0.267547	0.671357	1.59257	2.90659e-05	0.000576037	4.53662	-0.064503	0.956275	0.600087	0.79019	0.587137	1.50226	0.000126481	0.000761848
ENSG00000006534	ALDH3B1	3.36323	3.62611	3.16747	4.28825	4.26872	4.018	3.13929	3.01705	2.85873	3.99347	4.06941	3.4971	0.805596	1.74787	2.91284e-05	0.000576299	4.53568	-0.381581	0.767596	0.0244874	0.0976727	0.468664	1.38383	0.00503051	0.015735
ENSG00000173145	NOC3L	6.87281	6.87213	7.02157	6.52084	6.57451	6.66378	6.70079	6.65405	6.68127	6.31423	6.36001	6.35778	-0.335717	0.79239	2.91711e-05	0.000576299	4.53505	-0.243285	0.84482	0.000743837	0.00717386	-0.578044	0.669872	2.56571e-08	8.38336e-07
ENSG00000134291	TMEM106C	6.67429	6.78079	6.54731	6.00097	6.13278	6.05867	6.49751	6.37039	6.16136	5.97266	6.00889	5.77586	-0.603618	0.658101	2.91932e-05	0.000576299	4.53472	-0.324798	0.79841	0.00693125	0.038978	-0.748134	0.595373	2.2629e-06	2.85661e-05
ENSG00000142347	MYO1F	-0.149821	-0.0929354	-0.486204	0.458395	0.404562	0.792968	0.127752	-0.0347116	0.0902233	0.942281	0.585873	0.581388	0.794654	1.73466	2.93413e-05	0.00057847	4.53252	0.303905	1.23448	0.047766	0.155955	0.946267	1.92688	3.406e-06	3.95394e-05
ENSG00000177030	DEAF1	3.76082	3.86987	3.71035	4.46733	4.27272	4.4001	3.86703	3.77859	3.97405	4.35884	4.37714	4.16837	0.599446	1.51513	2.94141e-05	0.000578518	4.53144	0.092684	1.06635	0.411848	0.640544	0.521479	1.43543	0.00013675	0.000809704
ENSG00000111674	ENO2	3.83948	3.74836	3.84459	3.31758	2.91283	3.2498	3.82899	3.7616	3.69227	3.1571	3.10172	2.95546	-0.650643	0.636996	2.94201e-05	0.000578518	4.53136	-0.0497947	0.966074	0.659103	0.830288	-0.738623	0.599311	6.75427e-06	6.94718e-05
ENSG00000162437	RAVER2	6.18799	6.09885	6.25536	5.77206	5.774	5.9065	5.77318	5.87666	5.85682	5.5805	5.57379	5.57345	-0.363152	0.777464	2.95133e-05	0.0005796	4.52998	-0.344965	0.787327	5.20917e-05	0.000909864	-0.604623	0.657643	4.295e-08	1.23094e-06
ENSG00000099337	KCNK6	3.57643	3.4971	3.37752	3.95662	4.04136	3.96767	3.67103	3.65007	3.86825	3.97812	4.01053	4.19263	0.504596	1.41873	2.96987e-05	0.000582487	4.52726	0.24596	1.18588	0.0153255	0.0697957	0.575754	1.49046	5.62767e-06	5.94987e-05
ENSG00000163249	CCNYL1	4.60787	4.61734	4.75321	5.01208	5.02079	5.15023	4.84866	4.94411	4.86437	5.01507	5.13041	5.12735	0.401676	1.32104	3.00058e-05	0.000587749	4.52279	0.226514	1.17	0.00601142	0.0351211	0.431516	1.34865	1.23448e-05	0.000114052
ENSG00000112276	BVES	1.97966	1.89305	2.26453	1.40075	1.44639	1.42762	1.97909	2.22939	2.30213	1.72531	1.49475	1.53999	-0.620334	0.65052	3.01182e-05	0.00058863	4.52117	0.125116	1.0906	0.259932	0.487043	-0.458379	0.727804	0.000629075	0.00282005
ENSG00000149218	ENDOD1	6.3325	6.2954	6.34085	6.62366	6.66962	6.64272	6.2976	6.32162	6.36589	6.57065	6.6506	6.65405	0.322459	1.25046	3.01284e-05	0.00058863	4.52102	0.00553343	1.00384	0.925428	0.985905	0.302103	1.23294	6.1583e-05	0.000421517
ENSG00000101850	GPR143	0.940229	1.14352	0.830828	1.69645	1.58507	1.72245	1.15927	0.975898	0.587856	1.70793	1.57667	1.77848	0.696257	1.6203	3.04151e-05	0.000592879	4.51691	-0.0641481	0.95651	0.618556	0.802217	0.715824	1.64242	2.15803e-05	0.000177888
ENSG00000181481	RNF135	3.08089	2.95507	2.75977	3.35142	3.56082	3.51939	3.25691	3.12202	3.05442	3.65253	3.64115	3.47749	0.544713	1.45873	3.04241e-05	0.000592879	4.51678	0.211977	1.15827	0.0473978	0.154849	0.658628	1.57858	2.699e-06	3.2973e-05
ENSG00000118600	TMEM5	4.70356	4.65789	4.63114	5.04275	5.12637	5.01108	4.62079	4.64556	4.492	5.10189	4.97667	4.90064	0.395857	1.31572	3.08296e-05	0.000600009	4.51103	-0.0782539	0.947203	0.297282	0.528134	0.329288	1.25639	0.000222669	0.0012113
ENSG00000163743	RCHY1	5.73882	5.78387	5.72548	5.41224	5.43124	5.37972	5.6417	5.73164	5.53458	5.4092	5.37237	5.52046	-0.341685	0.789119	3.1052e-05	0.000602991	4.50791	-0.113547	0.924313	0.0769449	0.216471	-0.315768	0.803423	7.12696e-05	0.000475577
ENSG00000128567	PODXL	6.35711	6.20824	6.41156	6.85584	6.769	6.84671	6.79015	6.72806	7.02979	7.0379	7.00247	7.23731	0.498428	1.41267	3.10623e-05	0.000602991	4.50777	0.524037	1.43797	1.71973e-05	0.000381182	0.76675	1.70143	1.04244e-07	2.39461e-06
ENSG00000164284	GRPEL2	6.41651	6.35685	6.48345	5.89868	5.93566	5.93169	6.40098	6.51935	6.37766	5.96088	6.02412	6.11048	-0.496797	0.708678	3.12591e-05	0.000606036	4.50502	0.0138623	1.00965	0.874975	0.958732	-0.387252	0.764585	0.000390085	0.00191704
ENSG00000178425	NT5DC1	5.57327	5.6663	5.5357	5.92728	5.98055	5.93301	5.62277	5.56298	5.42984	5.83667	5.94539	5.82317	0.355033	1.27901	3.15729e-05	0.00061103	4.50069	-0.0534879	0.963604	0.420205	0.648949	0.276588	1.21133	0.000429403	0.00207331
ENSG00000184205	TSPYL2	3.93464	3.94001	3.97405	3.42848	3.5829	3.52255	4.14158	4.15228	4.10119	3.51682	3.41968	3.63473	-0.438254	0.738027	3.15973e-05	0.00061103	4.50035	0.182157	1.13458	0.0266486	0.103303	-0.426238	0.7442	4.11674e-05	0.000302686
ENSG00000164338	UTP15	6.06262	5.95552	6.04936	5.61951	5.76735	5.67905	5.97723	6.02508	5.90159	5.62848	5.63419	5.62589	-0.333787	0.793451	3.16716e-05	0.000611686	4.49933	-0.0544788	0.962942	0.368381	0.59806	-0.392876	0.76161	4.53652e-06	4.96593e-05
ENSG00000187231	SESTD1	5.34049	5.13242	5.1955	4.57729	4.68167	4.68595	4.53051	4.75504	4.59523	3.80842	3.9503	3.98731	-0.574586	0.671479	3.17904e-05	0.000612644	4.4977	-0.595836	0.661661	2.13218e-05	0.000452111	-1.30792	0.403904	8.21485e-10	6.84315e-08
ENSG00000132688	NES	5.12545	4.9616	4.99049	4.45654	4.37638	4.29434	4.64032	4.52278	4.3841	4.20373	4.04702	3.64208	-0.649922	0.637315	3.18021e-05	0.000612644	4.49754	-0.510302	0.702076	0.000360349	0.00420574	-1.05983	0.47969	8.2126e-08	2.02457e-06
ENSG00000204634	TBC1D8	5.3175	5.26629	5.26107	5.70295	5.65388	5.83576	5.28305	5.28764	5.39574	5.75142	5.74081	5.53358	0.449071	1.36516	3.18732e-05	0.000613236	4.49657	0.0405578	1.02851	0.627474	0.808929	0.394124	1.31414	0.000132125	0.000788952
ENSG00000196236	XPNPEP3	5.04575	5.16579	5.36067	5.56185	5.62541	5.67538	5.16323	5.248	5.23282	5.56138	5.56185	5.64243	0.430453	1.34766	3.22879e-05	0.000620427	4.49096	0.0243854	1.01705	0.760752	0.893899	0.398022	1.3177	7.61857e-05	0.000499078
ENSG00000095015	MAP3K1	4.84849	4.66758	4.7784	5.61133	5.51905	5.55506	4.7364	5.02534	4.97547	5.32416	5.38156	5.52845	0.797157	1.73767	3.24012e-05	0.00062175	4.48944	0.147841	1.10791	0.331701	0.563655	0.646206	1.56505	0.000310347	0.0015912
ENSG00000175970	UNC119B	6.04018	5.94643	5.84489	6.2818	6.33723	6.22763	6.27095	6.23402	6.17128	6.56489	6.57649	6.5362	0.338269	1.26424	3.24388e-05	0.00062175	4.48894	0.281362	1.21534	0.000236314	0.00303623	0.615249	1.53182	9.45253e-09	4.02556e-07
ENSG00000163817	SLC6A20	0.358613	0.119228	0.255157	1.25237	0.864755	1.24113	0.602024	0.40731	0.473299	1.06893	0.783193	0.669806	0.875089	1.83412	3.25156e-05	0.000622435	4.48791	0.2499	1.18912	0.134345	0.317358	0.596691	1.51224	0.00146772	0.00572127
ENSG00000135116	HRK	1.79697	1.91284	2.02968	1.18282	1.3946	1.01585	1.5517	1.26714	1.5006	0.587856	1.03517	0.558169	-0.715124	0.609153	3.25794e-05	0.000622871	4.48706	-0.473174	0.720378	0.00171813	0.0137678	-1.18576	0.439592	5.1752e-08	1.41767e-06
ENSG00000186951	PPARA	3.89082	3.66011	4.02046	4.84308	4.79981	4.96405	4.05809	4.21482	4.40742	4.86556	4.86829	5.34322	1.01232	2.01716	3.27192e-05	0.000624756	4.4852	0.37053	1.29283	0.0661997	0.195932	1.16782	2.24671	5.25666e-06	5.61637e-05
ENSG00000156521	TYSND1	3.21152	3.23462	3.30958	3.89082	3.82372	3.72944	3.24631	3.23082	3.27946	3.69283	3.62248	3.58648	0.563114	1.47745	3.29115e-05	0.000627612	4.48265	0.000473949	1.00033	0.996448	1	0.382476	1.30358	0.00157354	0.00606573
ENSG00000228594	C1orf233	2.37748	2.43984	2.16599	3.29477	3.07786	2.89852	1.70213	1.59283	1.70011	2.69389	2.7339	2.13131	0.762615	1.69656	3.29516e-05	0.000627612	4.48212	-0.663188	0.631481	0.000318245	0.00384455	0.193171	1.14327	0.18908	0.301483
ENSG00000112658	SRF	6.20035	6.15925	5.98764	5.72548	5.69032	5.66888	6.4231	6.29465	6.4821	6.14372	6.00545	6.01086	-0.421058	0.746877	3.31059e-05	0.000629416	4.48009	0.283993	1.21756	0.00119735	0.0102863	-0.0624428	0.957641	0.411862	0.54851
ENSG00000168575	SLC20A2	5.39273	5.30526	5.25508	5.83041	5.70027	5.68709	5.22425	5.06887	5.16387	5.47435	5.40994	5.2207	0.421551	1.33937	3.31733e-05	0.000629416	4.47921	-0.165504	0.891617	0.0489756	0.15837	0.0511327	1.03608	0.515262	0.648881
ENSG00000186575	NF2	7.07771	7.03513	6.87925	7.41038	7.30616	7.3347	7.10688	7.08185	7.1338	7.5237	7.46096	7.37031	0.35288	1.27711	3.31907e-05	0.000629416	4.47898	0.109953	1.07919	0.103747	0.266325	0.454313	1.37013	1.41148e-06	1.98511e-05
ENSG00000182093	WRB	4.5808	4.68242	4.69529	4.18298	4.21482	4.18298	4.68714	4.64663	4.65079	4.29119	4.27811	4.26998	-0.459159	0.72741	3.32124e-05	0.000629416	4.4787	0.00873721	1.00607	0.914215	0.979397	-0.372942	0.772206	0.000270459	0.00141588
ENSG00000067182	TNFRSF1A	6.22908	6.16604	6.02688	6.54287	6.48014	6.42669	6.4371	6.41091	6.36403	6.7541	6.74955	6.70131	0.34244	1.2679	3.33431e-05	0.000631105	4.47699	0.263103	1.20006	0.000520793	0.00550994	0.594212	1.50965	1.99986e-08	6.87689e-07
ENSG00000180806	HOXC9	2.27876	2.45106	2.46343	1.58886	1.59555	2.0729	2.74678	2.94764	2.82345	2.33008	2.42186	2.2348	-0.645605	0.639225	3.33853e-05	0.000631115	4.47644	0.441667	1.35817	0.000847525	0.00793168	-0.0683937	0.953699	0.551098	0.680977
ENSG00000233822	HIST1H2BN	-0.455709	-0.61207	-0.393936	0.221501	0.157039	0.0235571	0.0436988	-0.160176	-0.116094	0.611785	0.308531	0.513413	0.621405	1.53837	3.37935e-05	0.000638037	4.47117	0.409763	1.32847	0.00195696	0.0152308	0.965233	1.95238	1.08286e-07	2.45477e-06
ENSG00000107201	DDX58	4.7731	4.78528	4.90596	4.40155	4.29691	4.36457	4.79224	4.87551	4.83502	4.30566	4.41718	4.38309	-0.466849	0.723543	3.42763e-05	0.000646062	4.46501	0.0130707	1.0091	0.874418	0.958433	-0.452719	0.730665	4.60093e-05	0.000332974
ENSG00000189043	NDUFA4	7.12136	7.35052	7.20219	6.70179	6.769	6.74033	7.36279	7.24253	7.07215	7.05395	7.04267	7.03668	-0.487778	0.713123	3.43353e-05	0.000646062	4.46426	0.000919466	1.00064	0.991613	1	-0.180337	0.882497	0.0526711	0.108087
ENSG00000175548	ALG10B	1.61687	1.62904	1.87903	2.36532	2.5065	2.58564	1.56937	1.70495	1.75858	1.97966	2.21234	2.20221	0.777525	1.71419	3.43464e-05	0.000646062	4.46412	-0.0303919	0.979154	0.837129	0.937741	0.422905	1.34062	0.00855629	0.0243289
ENSG00000188917	TRMT2B	3.88097	3.78593	3.87456	3.3867	3.48211	3.37286	3.63736	3.67716	3.76596	3.08879	3.22397	3.16227	-0.433067	0.740686	3.44723e-05	0.000647612	4.46253	-0.15343	0.89911	0.0611898	0.18528	-0.688788	0.620375	1.08353e-07	2.45477e-06
ENSG00000205659	LIN52	4.45557	4.513	4.4039	3.77859	4.00042	4.07581	4.20474	4.16086	4.02973	3.78056	3.57419	3.70599	-0.506417	0.703969	3.45143e-05	0.000647612	4.462	-0.326035	0.797726	0.00210697	0.0161224	-0.770716	0.586126	2.04722e-07	4.0684e-06
ENSG00000180592	SKIDA1	-0.120073	0.0875969	-0.0565221	0.836902	0.84105	0.396529	-0.429938	-0.460497	-0.434982	0.535776	0.153313	0.113035	0.721295	1.64866	3.51933e-05	0.000658903	4.45354	-0.412187	0.751483	0.00641691	0.0368511	0.297281	1.22883	0.0367453	0.0806635
ENSG00000026559	KCNG1	2.80366	2.78536	2.54608	3.28547	3.35319	3.10769	2.49733	2.36205	2.40334	2.98541	3.17367	2.86256	0.536894	1.45085	3.52394e-05	0.000658903	4.45297	-0.291296	0.817167	0.0109175	0.0542076	0.295617	1.22741	0.00781157	0.0226014
ENSG00000198792	TMEM184B	6.32389	6.2896	6.23224	6.80318	6.61735	6.58471	6.33643	6.3484	6.42978	6.73236	6.82086	6.72122	0.386562	1.30727	3.52464e-05	0.000658903	4.45289	0.0895837	1.06406	0.2223	0.443459	0.476225	1.3911	2.65423e-06	3.25572e-05
ENSG00000141441	FAM59A	4.56121	4.56069	4.71096	5.15176	5.11574	5.12709	4.84308	5.00241	5.11518	5.1946	5.21829	5.41775	0.520903	1.43485	3.53433e-05	0.000659901	4.45169	0.376405	1.2981	0.000984107	0.00894487	0.665638	1.58627	1.56546e-06	2.12099e-05
ENSG00000123562	MORF4L2	7.69069	7.74983	7.88839	8.04638	8.11638	8.17948	7.88971	7.81998	7.87785	8.08878	8.08748	8.17292	0.33786	1.26388	3.5481e-05	0.000661658	4.45	0.086363	1.06169	0.178554	0.384741	0.340115	1.26586	3.23361e-05	0.000248101
ENSG00000171310	CHST11	4.40755	4.1325	4.31422	5.13488	5.07275	5.00457	4.25469	4.32525	4.43771	5.07153	5.09028	5.01127	0.786353	1.72471	3.55741e-05	0.000662579	4.44887	0.0548232	1.03873	0.716847	0.867714	0.77337	1.70926	4.20123e-05	0.000308151
ENSG00000084444	KIAA1467	4.77161	4.65193	4.8456	4.29458	4.3859	4.21308	4.92687	4.86598	4.96897	4.41343	4.35843	4.47881	-0.458054	0.727967	3.56985e-05	0.000663606	4.44735	0.164586	1.12084	0.0538254	0.169727	-0.339432	0.790352	0.000665544	0.00296077
ENSG00000160326	SLC2A6	2.37154	2.65277	2.61089	3.1712	3.26279	3.09081	2.6862	2.5731	2.92344	3.439	3.36209	3.41049	0.630053	1.54762	3.57168e-05	0.000663606	4.44713	0.182721	1.13502	0.137003	0.321571	0.858861	1.81361	6.15614e-07	1.00462e-05
ENSG00000120159	CAAP1	5.21925	5.18064	5.10003	4.71899	4.80104	4.73547	5.36482	5.39538	5.19902	4.88054	4.92386	4.97906	-0.41496	0.75004	3.59334e-05	0.000666813	4.4445	0.152837	1.11175	0.0502315	0.161348	-0.239246	0.847188	0.00485484	0.0152769
ENSG00000112062	MAPK14	6.51417	6.4	6.38269	6.12212	6.16155	6.03004	6.37567	6.35065	6.25648	5.99284	6.03029	6.06799	-0.327685	0.796814	3.60183e-05	0.000667571	4.44348	-0.104801	0.929933	0.0920775	0.244438	-0.402119	0.756746	3.11828e-06	3.68195e-05
ENSG00000143621	ILF2	9.35761	9.40601	9.35761	9.08718	9.1211	9.11158	9.23303	9.12551	9.13559	8.95066	8.91445	8.95066	-0.267163	0.830952	3.62298e-05	0.000670671	4.44093	-0.209088	0.865084	0.000448479	0.00492787	-0.4352	0.739591	6.97389e-08	1.77401e-06
ENSG00000088247	KHSRP	8.00246	7.92321	8.0209	8.54677	8.49622	8.25438	7.83378	7.77889	7.85172	8.21983	8.34581	8.08399	0.450511	1.36652	3.63484e-05	0.000672047	4.43951	-0.160641	0.894627	0.0701539	0.203936	0.234689	1.17665	0.0107505	0.0293357
ENSG00000183431	SF3A3	7.85491	7.91747	7.8192	7.53081	7.58904	7.56664	8.07344	8.00692	8.03017	7.73923	7.74623	7.70484	-0.301794	0.811243	3.64471e-05	0.000673051	4.43834	0.172889	1.12731	0.00509113	0.0308376	-0.133785	0.911437	0.0246087	0.0580237
ENSG00000177706	FAM20C	4.25438	4.22714	4.01592	4.68005	4.74286	4.50581	3.66011	3.59619	3.69671	4.3442	4.32288	4.05809	0.476885	1.39174	3.72116e-05	0.000685761	4.42932	-0.515235	0.699679	3.33124e-05	0.000649164	0.0764001	1.05438	0.400241	0.536734
ENSG00000115884	SDC1	5.98116	5.97927	5.90769	6.48802	6.27533	6.29	6.48926	6.47424	6.4659	6.89092	6.95309	6.97298	0.395101	1.31503	3.72595e-05	0.000685761	4.42876	0.520315	1.43427	1.19624e-06	4.66228e-05	0.982725	1.9762	7.65177e-11	1.18376e-08
ENSG00000129473	BCL2L2	5.17984	5.11404	5.38549	4.58289	4.75228	4.80229	5.35702	5.36442	5.36442	4.76045	4.78515	5.03481	-0.513747	0.700401	3.72711e-05	0.000685761	4.42863	0.135956	1.09882	0.147689	0.338286	-0.36669	0.77556	0.000948831	0.00398925
ENSG00000197226	TBC1D9B	7.29444	7.18661	7.21024	7.68708	7.58357	7.49659	7.2317	7.12564	7.26597	7.56005	7.51933	7.45028	0.358761	1.28232	3.75612e-05	0.000689725	4.42526	-0.0226404	0.984429	0.735977	0.878318	0.279621	1.21388	0.000491863	0.00230943
ENSG00000184117	NIPSNAP1	7.03309	7.1234	6.91028	7.46955	7.42373	7.40841	6.91856	6.71048	6.78009	7.40453	7.33668	7.21197	0.411437	1.33001	3.75775e-05	0.000689725	4.42507	-0.219503	0.858862	0.010638	0.0533195	0.295533	1.22734	0.00103192	0.00426408
ENSG00000092208	GEMIN2	4.84761	4.93206	4.86153	4.37687	4.45221	4.53879	4.5602	4.40768	4.4884	3.98493	4.11616	4.13405	-0.42473	0.744978	3.76272e-05	0.000689802	4.4245	-0.395105	0.760434	8.15194e-05	0.0013162	-0.802497	0.573356	1.14011e-08	4.58208e-07
ENSG00000172780	RAB43	0.998444	1.01621	0.0425337	2.69801	2.02919	2.04783	1.27994	2.04375	1.66258	2.10893	2.1811	2.47812	1.57255	2.97431	3.77528e-05	0.000690446	4.42305	0.975855	1.96681	0.00393385	0.0255971	1.56877	2.96651	3.77952e-05	0.000282411
ENSG00000137710	RDX	7.50078	7.4598	7.59428	7.79099	7.85738	7.87687	7.39946	7.43184	7.48444	7.54	7.59913	7.72172	0.323539	1.2514	3.77799e-05	0.000690446	4.42274	-0.0795504	0.946353	0.199475	0.41377	0.101859	1.07316	0.10304	0.186507
ENSG00000082805	ERC1	5.47567	5.32585	5.52338	6.1141	6.1385	5.9866	5.70729	5.71031	5.91168	6.17128	6.20089	6.21275	0.638481	1.55669	3.7799e-05	0.000690446	4.42252	0.335156	1.26151	0.011023	0.0545607	0.753529	1.68591	4.86809e-06	5.27916e-05
ENSG00000163900	TMEM41A	5.58855	5.62073	5.41351	4.99154	5.2349	5.04053	5.35481	5.37845	5.38109	5.08811	5.15966	5.02105	-0.452232	0.730911	3.79554e-05	0.000692469	4.42073	-0.169778	0.888979	0.0510016	0.16313	-0.451382	0.731342	3.7479e-05	0.000280554
ENSG00000166473	DKFZP686J19100	0.272424	0.371725	0.332789	0.926068	0.84105	1.13268	0.602024	0.764357	0.422694	1.17535	0.923433	0.809893	0.640847	1.55924	3.80344e-05	0.000693076	4.41982	0.270661	1.20636	0.0339827	0.123139	0.644231	1.56291	3.53991e-05	0.00026714
ENSG00000103257	SLC7A5	9.18232	9.084	9.03347	9.75506	9.68724	9.33783	9.16749	9.22451	9.11492	9.51212	9.65865	9.47912	0.493602	1.40796	3.81995e-05	0.000695128	4.41794	0.0689602	1.04896	0.458241	0.682162	0.450067	1.3661	0.00010431	0.000647604
ENSG00000265242	RP11-649A18.7	0.604546	0.672967	0.443162	1.23616	1.23956	1.08612	0.669404	0.547757	0.518746	0.9633	0.808569	0.770695	0.613663	1.53014	3.82387e-05	0.000695128	4.4175	0.00492024	1.00342	0.965813	1	0.273992	1.20915	0.0259522	0.0606724
ENSG00000137955	RABGGTB	6.7216	6.79684	6.91155	6.35624	6.40179	6.49906	6.84006	6.75257	6.85032	6.53085	6.55516	6.69099	-0.390911	0.762648	3.83133e-05	0.000695651	4.41665	0.00449853	1.00312	0.949468	0.998656	-0.217819	0.859864	0.00657631	0.0195958
ENSG00000157637	SLC38A10	5.70148	5.63588	5.64979	6.49648	6.35188	6.03923	5.82271	5.76259	5.66128	6.42618	6.66099	6.30537	0.63385	1.5517	3.86891e-05	0.000701633	4.41241	0.0863958	1.06171	0.475011	0.696716	0.802197	1.74375	2.0028e-06	2.59748e-05
ENSG00000215570	ZDHHC20	5.8187	5.85578	6.05639	6.32007	6.34294	6.4489	5.80169	5.7392	5.72791	6.24305	6.33498	6.17016	0.460534	1.37605	3.87529e-05	0.00070195	4.4117	-0.15376	0.898904	0.0923266	0.244885	0.339615	1.26542	0.00084672	0.00361711
ENSG00000197713	RPE	5.82518	5.79616	6.01694	6.33561	6.2487	6.53195	5.71117	5.68133	5.82476	6.13764	6.19598	6.29236	0.492763	1.40714	3.88026e-05	0.000702013	4.41114	-0.139978	0.907533	0.147872	0.338551	0.329231	1.25634	0.00196387	0.00728332
ENSG00000110057	UNC93B1	4.09471	4.10432	4.07133	4.64979	4.73134	4.50581	4.08659	4.10941	4.15228	4.62638	4.70792	4.40277	0.539011	1.45298	3.92642e-05	0.000709516	4.406	0.0259522	1.01815	0.801547	0.916256	0.489632	1.40409	0.00011159	0.000686614
ENSG00000213186	TRIM59	5.96063	6.08272	6.0488	5.52108	5.67001	5.71555	5.54488	5.53546	5.31968	4.94016	5.0252	4.95039	-0.395329	0.760316	3.95026e-05	0.000712975	4.40337	-0.564172	0.676343	5.29338e-07	2.46175e-05	-1.05876	0.480043	6.79111e-11	1.09532e-08
ENSG00000137814	HAUS2	6.00207	6.11123	6.09746	5.65448	5.70098	5.72045	5.7541	5.8054	5.52638	5.42661	5.43198	5.30093	-0.378316	0.769335	3.97895e-05	0.000717298	4.40023	-0.375061	0.771073	4.37831e-05	0.000801685	-0.683395	0.622698	2.03639e-08	6.96922e-07
ENSG00000109107	ALDOC	4.30894	4.31332	4.25575	4.91307	4.79139	5.07504	4.4121	4.21482	4.53031	5.14085	4.98106	5.14277	0.633471	1.55129	3.98916e-05	0.000718286	4.39912	0.0930584	1.06663	0.44742	0.672749	0.795305	1.73544	2.22692e-06	2.8253e-05
ENSG00000138442	WDR12	6.93464	6.99341	7.09021	6.61398	6.72011	6.71803	6.90838	6.79239	6.92183	6.59042	6.61012	6.63426	-0.321977	0.799973	4.01749e-05	0.000722529	4.39605	-0.131736	0.912732	0.0373844	0.13178	-0.394431	0.760789	3.5991e-06	4.11819e-05
ENSG00000105426	PTPRS	5.75011	5.70716	5.78975	6.25431	6.08967	6.15991	5.67094	5.69641	5.74426	6.10252	6.07843	6.1096	0.419108	1.3371	4.02506e-05	0.000722687	4.39523	-0.0449963	0.969292	0.572725	0.769504	0.347916	1.27272	0.000286295	0.0014875
ENSG00000102854	MSLN	3.63493	3.71176	3.65718	4.60475	4.54895	4.29178	3.91772	3.94584	3.74973	4.77179	4.93922	4.69787	0.814193	1.75831	4.03163e-05	0.000722687	4.39452	0.202938	1.15104	0.207086	0.423474	1.13531	2.19665	4.96733e-07	8.39573e-06
ENSG00000113558	SKP1	8.58615	8.6422	8.66141	8.25035	8.28775	8.34781	8.66609	8.62869	8.55464	8.4517	8.44612	8.42859	-0.334642	0.792981	4.03635e-05	0.000722687	4.39401	-0.0134534	0.990718	0.826979	0.931626	-0.187722	0.877991	0.00665416	0.0197811
ENSG00000173818	ENDOV	3.02327	3.01651	2.89798	3.66128	3.51119	3.39069	3.26808	3.29582	2.99244	3.55267	3.76312	3.57214	0.541882	1.45587	4.03744e-05	0.000722687	4.39389	0.20576	1.15329	0.0579381	0.178428	0.649952	1.56912	4.12091e-06	4.59053e-05
ENSG00000168528	SERINC2	5.72002	5.56274	5.23655	6.36442	6.19946	6.07635	5.59448	5.58469	5.46051	6.39484	6.3726	6.06706	0.706603	1.63196	4.11121e-05	0.000734448	4.38603	0.0394667	1.02773	0.770834	0.899593	0.77184	1.70745	1.4057e-05	0.000125957
ENSG00000165724	ZMYND19	4.91252	4.90738	4.60939	5.50127	5.42337	5.22709	4.52	4.43062	4.4514	5.16953	5.10291	4.93269	0.573837	1.48848	4.11283e-05	0.000734448	4.38586	-0.343043	0.788376	0.00663102	0.0378797	0.258667	1.19637	0.0265726	0.0618464
ENSG00000233165	RP11-96C23.8	0.687494	0.546606	0.603195	0.0306716	-0.045088	0.113708	0.500017	0.731883	0.838502	0.126572	0.190315	0.263105	-0.579356	0.669263	4.17122e-05	0.000743999	4.37974	0.0777828	1.05539	0.468712	0.691711	-0.419194	0.747843	0.000997118	0.00414818
ENSG00000136943	CTSL2	4.22093	4.17053	4.10615	3.42492	3.69359	3.68944	3.95183	3.76352	3.71339	3.57791	3.56288	3.31138	-0.563647	0.67659	4.19754e-05	0.000747812	4.37701	-0.356606	0.781	0.00271871	0.019461	-0.681093	0.623693	4.72793e-06	5.15314e-05
ENSG00000104756	KCTD9	6.29399	6.24071	6.3808	5.91779	5.87763	5.98116	6.1318	6.28315	6.1898	5.83314	5.89414	5.96812	-0.379538	0.768683	4.20765e-05	0.000748735	4.37596	-0.103395	0.93084	0.151078	0.343746	-0.406797	0.754296	1.88011e-05	0.000159778
ENSG00000197168	NEK5	0.626901	0.625903	0.443162	-0.167407	-0.543342	-0.156176	0.3032	0.625075	0.119056	-0.390772	-0.0565221	-0.205757	-0.854439	0.55308	4.21495e-05	0.000749154	4.37521	-0.216366	0.860731	0.181041	0.388446	-0.783186	0.581082	0.000106326	0.000659036
ENSG00000184216	IRAK1	7.17933	7.0375	7.03226	7.58134	7.4527	7.37601	7.09045	7.02884	7.00893	7.51553	7.59191	7.39811	0.387058	1.30772	4.22175e-05	0.000749484	4.37451	-0.0403665	0.972408	0.583233	0.7779	0.419003	1.337	1.64734e-05	0.000143537
ENSG00000118263	KLF7	1.83296	1.46281	1.7845	2.72022	2.79746	2.69055	1.50722	1.8615	1.74721	2.67697	2.32602	2.84727	1.04293	2.06041	4.23565e-05	0.000750319	4.37308	0.0121633	1.00847	0.952575	0.999654	0.922744	1.89572	0.000163448	0.000934996
ENSG00000140297	GCNT3	0.98778	1.14352	1.1138	1.65255	1.77727	1.73486	0.840468	0.87	0.94233	1.63892	1.82815	1.61709	0.639835	1.55815	4.23853e-05	0.000750319	4.37279	-0.197407	0.872117	0.1181	0.289353	0.613142	1.52959	6.7205e-05	0.00045385
ENSG00000188343	FAM92A1	6.45641	6.58943	6.50976	6.1498	6.15707	6.23595	6.15991	6.19676	6.0105	6.01211	5.9917	5.97033	-0.337733	0.791284	4.2413e-05	0.000750319	4.3725	-0.396275	0.759817	6.68812e-06	0.000188473	-0.527133	0.693932	1.62742e-07	3.37992e-06
ENSG00000073331	ALPK1	2.74121	2.78384	2.77388	3.13745	3.12332	3.22898	2.64207	2.67612	2.67508	2.99042	3.05857	2.94077	0.396809	1.31659	4.29955e-05	0.00075918	4.36658	-0.101869	0.931825	0.193605	0.405854	0.230491	1.17323	0.00598446	0.018128
ENSG00000196636	ACN9	4.79603	4.76309	4.81038	4.35174	4.33106	4.41665	4.69496	4.53553	4.44506	4.40717	4.39783	4.42007	-0.423367	0.745682	4.3084e-05	0.00075918	4.36568	-0.231399	0.851808	0.00780792	0.042766	-0.381448	0.767666	0.000123848	0.000748968
ENSG00000153531	ADPRHL1	2.94739	3.27629	2.8827	3.64067	3.59079	3.57095	3.13465	3.10412	2.93698	3.74183	3.72196	3.50159	0.5648	1.47918	4.31121e-05	0.00075918	4.3654	0.0223666	1.01562	0.837779	0.937934	0.619839	1.5367	1.36915e-05	0.000123705
ENSG00000196204	RNF216P1	4.79834	4.96224	4.74128	4.42852	4.27423	4.49509	4.83999	4.87846	4.66173	4.39783	4.2914	4.44895	-0.435177	0.739603	4.31142e-05	0.00075918	4.36538	-0.0410346	0.971958	0.605381	0.793823	-0.455186	0.729416	2.52959e-05	0.000203238
ENSG00000135845	PIGC	4.4121	4.52529	4.52979	4.08832	3.94727	4.067	4.4542	4.4039	4.39154	3.95099	3.92362	4.20085	-0.454817	0.729603	4.32656e-05	0.000760826	4.36386	-0.0724875	0.950997	0.385971	0.615322	-0.464715	0.724614	3.28756e-05	0.000251477
ENSG00000223959	AFG3L1P	4.71564	4.513	4.46164	3.96978	3.8874	4.01266	4.32307	4.38658	4.04383	3.64755	3.47863	3.70948	-0.607106	0.656512	4.3321e-05	0.000760826	4.3633	-0.312678	0.805146	0.0108036	0.0538264	-0.952115	0.516874	1.94968e-07	3.90993e-06
ENSG00000119514	GALNT12	4.25438	4.22271	3.98003	4.75019	4.83424	4.75681	3.80334	3.70804	3.50215	4.47304	4.49018	4.08855	0.627533	1.54492	4.33582e-05	0.000760826	4.36293	-0.481936	0.716016	0.00120021	0.0102863	0.199	1.1479	0.110538	0.197114
ENSG00000123095	BHLHE41	0.0618953	-0.236093	0.0924797	0.6745	0.803455	1.05163	-0.138181	-0.425779	0.0343666	0.0150197	0.553876	0.248633	0.870416	1.82819	4.37383e-05	0.000766608	4.35914	-0.149127	0.901796	0.373885	0.602327	0.299802	1.23098	0.0814509	0.154129
ENSG00000185344	ATP6V0A2	4.4121	4.39615	4.4907	4.89094	4.88895	4.9757	4.04326	4.01266	4.06268	4.40426	4.42613	4.62955	0.485631	1.4002	4.39251e-05	0.000768493	4.35729	-0.393241	0.761417	0.000663695	0.00653431	0.0531306	1.03751	0.569587	0.698534
ENSG00000109854	HTATIP2	5.94172	6.01545	6.07802	6.36057	6.42575	6.50286	5.99783	5.80308	5.92511	6.46234	6.41236	6.40995	0.417996	1.33607	4.39472e-05	0.000768493	4.35707	-0.102971	0.931114	0.208638	0.42567	0.416675	1.33485	4.45451e-05	0.000324219
ENSG00000138279	ANXA7	7.22469	7.27297	7.20562	6.94253	6.97562	6.99187	7.1184	7.08465	7.02433	6.8637	6.88939	6.94323	-0.264518	0.832477	4.40316e-05	0.000768805	4.35624	-0.15873	0.895813	0.00447618	0.0281824	-0.335858	0.792313	2.52843e-06	3.12417e-05
ENSG00000197622	CDC42SE1	6.51831	6.48261	6.53584	6.14231	6.16851	6.25536	6.96089	6.95415	6.94829	6.59291	6.62479	6.7561	-0.323561	0.799095	4.4114e-05	0.000768805	4.35542	0.442247	1.35872	6.17708e-07	2.79938e-05	0.145411	1.10605	0.0231414	0.0551999
ENSG00000142621	FHAD1	0.67944	0.737737	0.507382	1.24345	1.3946	1.5296	0.832377	0.470835	0.897676	1.12118	0.783193	0.81677	0.74744	1.67881	4.41172e-05	0.000768805	4.35539	0.0920031	1.06585	0.519206	0.730077	0.265618	1.20215	0.0731553	0.141324
ENSG00000144040	SFXN5	3.25038	3.1318	3.34938	3.981	3.62376	3.85786	3.32103	3.48272	3.40482	3.80257	3.89539	3.82189	0.577448	1.49221	4.43094e-05	0.000771268	4.3535	0.159432	1.11685	0.163146	0.361458	0.596505	1.51205	2.92771e-05	0.000228681
ENSG00000013583	HEBP1	4.49834	4.4542	4.2959	4.97427	4.91825	4.97627	4.29272	4.32097	4.26703	4.95649	4.88826	4.68532	0.539743	1.45371	4.47197e-05	0.000777517	4.3495	-0.122946	0.918311	0.252853	0.478889	0.427647	1.34504	0.000500246	0.00234009
ENSG00000066583	ISOC1	5.75011	5.84009	5.83499	6.12895	6.18258	6.14276	5.55595	5.52674	5.6602	5.94172	5.97301	5.83774	0.343057	1.26844	4.48265e-05	0.000778481	4.34847	-0.227349	0.854203	0.00273444	0.0195367	0.109374	1.07876	0.10472	0.189074
ENSG00000129315	CCNT1	7.24105	7.10221	7.42262	6.62479	6.68326	6.69127	7.24105	7.3945	7.37203	6.52351	6.66806	6.9156	-0.588576	0.664999	4.54635e-05	0.000788424	4.34234	0.0809309	1.0577	0.45509	0.679766	-0.553315	0.681452	8.56217e-05	0.000551783
ENSG00000174989	FBXW8	3.71242	3.76005	3.79015	4.30797	4.25438	4.28303	3.83512	3.60645	3.77646	4.19446	4.04702	4.33058	0.527684	1.44161	4.5503e-05	0.000788424	4.34196	-0.0147989	0.989795	0.885343	0.965106	0.435971	1.35282	0.000338952	0.00171067
ENSG00000203306	AP001007.1	0.919867	0.631345	0.569636	1.61152	1.6576	1.27994	0.72514	0.495876	0.336965	0.971132	1.40429	0.800236	0.80951	1.75262	4.61062e-05	0.000797963	4.33624	-0.187774	0.877959	0.236763	0.46085	0.351846	1.27619	0.0325492	0.0731188
ENSG00000235750	KIAA0040	2.68557	2.29351	2.73934	3.32103	3.60619	3.5953	2.14659	2.50865	2.55125	3.57791	3.39996	3.81895	0.935063	1.91197	4.62786e-05	0.000798304	4.33462	-0.169787	0.888974	0.37164	0.600842	1.02579	2.03608	1.45122e-05	0.000129499
ENSG00000111880	RNGTT	6.34512	6.27364	6.44973	5.76967	6.0005	6.02081	6.28652	6.41651	6.42243	5.94103	6.0488	6.06472	-0.425797	0.744427	4.62826e-05	0.000798304	4.33458	0.019262	1.01344	0.806094	0.918817	-0.337972	0.791153	0.000461298	0.00219515
ENSG00000154059	IMPACT	4.96013	4.88115	4.86871	5.35592	5.32694	5.35984	4.9996	4.87381	4.70998	5.13606	5.1929	5.30321	0.444158	1.36052	4.62838e-05	0.000798304	4.33457	-0.0424481	0.971006	0.622072	0.804713	0.306915	1.23706	0.00169849	0.00644739
ENSG00000266401	RP11-874J12.4	1.09805	1.59428	0.772929	2.41045	2.29883	2.31576	1.533	1.5446	1.19995	2.71909	2.56173	2.63364	1.18618	2.2755	4.66355e-05	0.000803447	4.33128	0.27019	1.20597	0.251917	0.477832	1.4827	2.79472	2.58476e-06	3.18857e-05
ENSG00000153993	SEMA3D	3.24735	3.02533	3.56082	2.5968	2.39042	2.5117	2.5739	2.59806	2.98387	1.49475	1.71729	2.08061	-0.777169	0.583511	4.67181e-05	0.000803447	4.33052	-0.557969	0.679258	0.00106338	0.00943904	-1.51366	0.350222	1.22989e-08	4.8653e-07
ENSG00000183682	BMP8A	0.0258142	-0.359832	-0.0116722	0.523133	0.545858	0.723936	-0.00201349	-0.171263	0.0159163	-0.158195	0.139168	0.237272	0.712916	1.63911	4.6741e-05	0.000803447	4.3303	0.0629059	1.04457	0.643826	0.819971	0.187828	1.13905	0.176589	0.285696
ENSG00000135378	PRRG4	4.28225	4.20662	4.50435	4.77285	4.83845	5.00963	4.33281	4.32195	4.4884	4.82554	4.84188	5.05378	0.542873	1.45687	4.68524e-05	0.00080445	4.32927	0.0506767	1.03575	0.631543	0.811425	0.575903	1.49061	2.27305e-05	0.000185477
ENSG00000186106	ANKRD46	5.85682	5.92841	5.89393	5.47323	5.39783	5.62443	5.83314	5.95088	5.74126	5.56062	5.56804	5.76347	-0.394765	0.760613	4.69215e-05	0.000804726	4.32863	-0.0513687	0.96502	0.484906	0.704789	-0.262843	0.833444	0.0020668	0.0075744
ENSG00000165156	ZHX1	5.00879	4.92049	5.16848	5.59006	5.59827	5.68531	4.97627	5.19852	5.15624	5.42527	5.5184	5.66932	0.592293	1.50764	4.75439e-05	0.000813889	4.32291	0.0782742	1.05575	0.497395	0.713772	0.504965	1.41909	0.000257314	0.00136096
ENSG00000230439	RP11-488P3.1	-0.149821	-0.236093	0.151678	0.510918	0.565884	0.530079	0.127752	0.0883807	0.213578	0.344463	0.585873	0.217545	0.613879	1.53037	4.759e-05	0.000813889	4.32248	0.221508	1.16595	0.0702939	0.204197	0.461065	1.37656	0.000839082	0.00358954
ENSG00000100106	TRIOBP	6.71902	6.71102	6.53904	7.24384	7.10537	7.02377	6.91694	6.82223	6.69341	7.27278	7.27278	7.26662	0.467882	1.38308	4.76169e-05	0.000813889	4.32224	0.154173	1.11278	0.0973819	0.254553	0.61415	1.53066	1.62834e-06	2.19053e-05
ENSG00000138399	FASTKD1	5.50153	5.40455	5.69364	4.91735	4.9676	5.1869	5.22726	5.2505	5.28148	4.72331	4.83753	5.04358	-0.509187	0.702618	4.76846e-05	0.000814129	4.32162	-0.279711	0.823756	0.00799102	0.0432995	-0.665564	0.630442	2.06131e-06	2.65744e-05
ENSG00000138756	BMP2K	4.92911	4.83831	5.06406	5.82476	5.92803	5.75295	4.95448	5.13912	5.04608	5.57465	5.72322	5.71333	0.891898	1.85562	4.78451e-05	0.000815951	4.32016	0.103159	1.07412	0.557055	0.758156	0.72673	1.65488	0.0004125	0.00200811
ENSG00000261526	CTB-31O20.2	1.81036	1.88488	2.12249	1.21024	1.44639	1.24113	1.59471	1.48712	1.83111	0.921273	1.21388	1.14019	-0.63961	0.641886	4.81019e-05	0.000819408	4.31784	-0.301156	0.811602	0.0202848	0.0849788	-0.847254	0.555842	1.68331e-06	2.24852e-05
ENSG00000160588	MPZL3	3.55273	3.4971	3.61229	4.02693	4.02062	4.18598	4.09228	4.18997	4.13486	4.44664	4.32399	4.74404	0.523794	1.43773	4.92214e-05	0.000836983	4.30785	0.585232	1.50028	1.31508e-05	0.000319545	0.949966	1.93183	1.36435e-08	5.15833e-07
ENSG00000267147	CTC-548K16.1	1.01019	0.756374	0.475805	1.76433	1.52947	1.55318	0.627736	0.601702	0.189751	1.03355	1.0959	0.989924	0.868079	1.82523	4.9244e-05	0.000836983	4.30765	-0.274698	0.826623	0.115757	0.285659	0.292185	1.22449	0.0919889	0.170203
ENSG00000167447	SMG8	6.40197	6.39361	6.42364	6.10496	6.11551	6.15707	6.52729	6.53195	6.57162	6.22838	6.21349	6.34537	-0.280561	0.823271	4.93969e-05	0.00083864	4.3063	0.137276	1.09983	0.0158636	0.0714733	-0.144218	0.90487	0.0126688	0.0336436
ENSG00000182504	CEP97	5.64429	5.41293	5.89484	4.70958	4.75396	4.90236	5.35417	5.66686	5.74556	4.26036	4.31381	4.82106	-0.861635	0.550329	4.96869e-05	0.000842622	4.30376	-0.0609872	0.958608	0.695184	0.853969	-1.18676	0.439289	1.2961e-06	1.84566e-05
ENSG00000152804	HHEX	3.51921	3.49359	3.78012	3.11715	3.08146	2.9588	2.76133	2.9982	3.05036	2.37172	2.55539	2.45032	-0.544389	0.685682	4.98365e-05	0.000844214	4.30245	-0.660253	0.632767	5.6814e-06	0.000165612	-1.13799	0.454391	4.46541e-09	2.24173e-07
ENSG00000141959	PFKL	6.42978	6.4227	6.23697	6.9438	6.89844	6.76196	6.4206	6.35402	6.30941	7.06987	7.12202	6.80493	0.504803	1.41893	5.00079e-05	0.000846172	4.30096	-0.00210963	0.998539	0.982747	1	0.636076	1.5541	2.91982e-06	3.51049e-05
ENSG00000058262	SEC61A1	8.40548	8.34367	8.30857	8.63132	8.63132	8.58356	8.83738	8.85592	8.91136	8.97474	8.96216	9.05837	0.262809	1.19981	5.01605e-05	0.000847807	4.29964	0.515621	1.42961	6.00199e-09	7.8445e-07	0.645686	1.56448	1.74951e-10	2.12037e-08
ENSG00000125731	SH2D3A	5.15467	5.16799	5.29047	5.79701	5.61015	5.5569	5.52308	5.54799	5.739	6.09499	6.14092	6.09885	0.450724	1.36673	5.0219e-05	0.000847851	4.29913	0.399321	1.31889	0.000185653	0.00252665	0.907456	1.87574	3.27435e-09	1.7793e-07
ENSG00000123737	EXOSC9	5.88182	6.1312	5.96944	5.42544	5.4999	5.5271	5.51357	5.45666	5.25385	5.0987	5.14682	4.84514	-0.510236	0.702108	5.04391e-05	0.000850035	4.29723	-0.586407	0.665999	1.06083e-05	0.000272148	-0.963296	0.512884	1.70107e-08	6.18463e-07
ENSG00000138759	FRAS1	6.39662	6.1244	6.63729	5.70931	5.81175	5.81059	6.22747	6.43332	6.36342	5.38082	5.52932	5.68279	-0.608352	0.655945	5.04605e-05	0.000850035	4.29705	-0.0440477	0.96993	0.695339	0.85402	-0.855163	0.552803	8.84727e-07	1.34374e-05
ENSG00000070718	AP3M2	4.74932	4.70819	4.97367	4.29159	4.43011	4.36848	4.47491	4.39187	4.47473	4.018	4.1127	4.021	-0.446559	0.733791	5.06438e-05	0.000852176	4.29547	-0.362723	0.777695	0.000402604	0.00458249	-0.759253	0.590802	7.29329e-08	1.83677e-06
ENSG00000214900	C14orf182	0.337879	0.756374	0.405491	1.10564	1.03489	1.1472	0.431911	0.431911	0.324058	0.684072	0.846251	0.945834	0.595822	1.51133	5.08981e-05	0.000855505	4.2933	-0.104124	0.93037	0.369032	0.598384	0.325095	1.25275	0.00972643	0.0270183
ENSG00000104081	BMF	0.765775	0.319122	0.540005	-0.354227	-0.613996	-0.276117	0.627736	0.455602	1.10133	-0.390772	-0.544177	-0.33127	-0.956387	0.515346	5.10577e-05	0.000856451	4.29194	0.186766	1.13821	0.300934	0.532375	-0.963707	0.512738	4.66231e-05	0.000336436
ENSG00000121210	KIAA0922	5.20784	5.15345	5.27487	5.63088	5.58649	5.60083	5.25543	5.24172	5.42661	5.51334	5.64442	5.54773	0.39423	1.31424	5.10673e-05	0.000856451	4.29186	0.0961687	1.06893	0.215441	0.434637	0.356644	1.28044	0.000147823	0.000863916
ENSG00000012211	PRICKLE3	3.67136	3.82501	3.73562	4.19822	4.13607	4.26527	4.07367	4.03671	4.26628	4.52314	4.57661	4.42794	0.455631	1.37138	5.12457e-05	0.000858493	4.29034	0.38159	1.30278	0.000336645	0.0039999	0.765484	1.69994	4.85514e-08	1.3581e-06
ENSG00000183255	PTTG1IP	7.27199	7.3347	7.31252	7.60745	7.60814	7.57756	7.38056	7.38196	7.39946	7.67342	7.74512	7.70624	0.291321	1.22376	5.26887e-05	0.000881693	4.27828	0.0809215	1.05769	0.159039	0.355686	0.401828	1.32118	9.79509e-07	1.45591e-05
ENSG00000139174	PRICKLE1	3.10059	2.88789	2.78384	3.73334	3.85644	3.2668	2.4459	2.37172	2.67052	2.95967	3.01788	2.77928	0.695142	1.61904	5.28132e-05	0.000882802	4.27726	-0.428212	0.743182	0.0069893	0.0392317	-0.00483745	0.996653	0.97198	0.998819
ENSG00000111331	OAS3	7.05932	6.94323	6.79736	6.37091	6.4083	6.24327	6.62832	6.64957	6.41815	5.98682	5.96655	5.49323	-0.592574	0.663158	5.33255e-05	0.000890382	4.27307	-0.368271	0.77471	0.00377712	0.0248869	-1.11688	0.46109	1.84392e-08	6.55464e-07
ENSG00000130638	ATXN10	6.68957	6.73481	6.67623	7.01284	7.06428	7.07945	6.72833	6.68375	6.51935	7.07595	7.02825	6.981	0.351885	1.27623	5.34338e-05	0.00089121	4.27218	-0.0565468	0.961563	0.411096	0.639992	0.328295	1.25553	0.000111574	0.000686614
ENSG00000112592	TBP	4.94856	4.9825	4.95404	4.4825	4.58558	4.64699	4.5602	4.54346	4.63875	4.37452	4.13601	4.26527	-0.390235	0.763005	5.36785e-05	0.000893178	4.2702	-0.380879	0.76797	6.95651e-05	0.00115265	-0.702992	0.614297	3.40177e-08	1.04401e-06
ENSG00000172197	MBOAT1	4.34516	4.21054	4.15243	3.71744	3.81015	3.74146	3.67103	3.4971	3.46479	3.03205	2.93733	2.82997	-0.479878	0.717038	5.37602e-05	0.000893178	4.26954	-0.692056	0.618971	7.30898e-07	3.18424e-05	-1.30256	0.405407	1.20688e-10	1.61925e-08
ENSG00000106211	HSPB1	7.86369	7.99555	7.78475	7.34641	7.22895	7.25357	8.0209	7.9032	7.81093	7.46811	7.44036	7.15861	-0.60515	0.657403	5.37836e-05	0.000893178	4.26935	0.0301042	1.02109	0.789724	0.910309	-0.525293	0.694818	0.000225616	0.00122338
ENSG00000142794	NBPF3	4.07301	4.13513	4.13405	3.52433	3.67716	3.64936	4.06384	4.02183	4.0074	3.21011	3.33366	3.51181	-0.4972	0.70848	5.38723e-05	0.000893178	4.26863	-0.0830463	0.944062	0.372184	0.601254	-0.763069	0.589241	3.15653e-07	5.83611e-06
ENSG00000071243	ING3	4.41649	4.46925	4.41945	4.09087	3.97909	4.04643	4.29045	4.46467	4.1897	3.97812	3.94239	4.03484	-0.396328	0.759789	5.3877e-05	0.000893178	4.2686	-0.120294	0.92	0.1174	0.288244	-0.450254	0.731914	1.24911e-05	0.000115109
ENSG00000072071	LPHN1	5.33101	5.10046	5.32369	5.79375	5.67668	5.69682	5.14581	4.97289	5.16697	5.50642	5.43744	5.49636	0.471043	1.38611	5.39053e-05	0.000893178	4.26837	-0.156184	0.897396	0.105402	0.269296	0.228616	1.17171	0.0200979	0.0491222
ENSG00000152382	TADA1	4.94329	5.04868	5.06673	4.63599	4.64161	4.67089	4.78794	4.78573	4.85387	4.55505	4.49454	4.69575	-0.370033	0.773765	5.42123e-05	0.000897137	4.2659	-0.210265	0.864378	0.00706488	0.0394951	-0.438214	0.738048	7.69462e-06	7.69513e-05
ENSG00000119638	NEK9	6.37811	6.29287	6.31423	6.80054	6.74486	6.75769	6.40179	6.40396	6.34294	6.78644	6.79945	6.85181	0.43932	1.35597	5.42625e-05	0.000897137	4.2655	0.0544682	1.03848	0.524645	0.73365	0.484034	1.39865	1.72394e-05	0.000148588
ENSG00000240053	LY6G5B	1.22765	1.16478	1.54886	0.541061	0.304086	0.469924	1.51304	0.915003	1.20926	0.331436	0.74078	0.628655	-0.875133	0.545204	5.44564e-05	0.000899361	4.26395	-0.101111	0.932315	0.540056	0.745294	-0.746716	0.595959	0.000273192	0.00142774
ENSG00000143622	RIT1	3.01229	2.85873	3.31524	2.16516	2.34309	2.43551	2.82417	2.84539	2.74554	1.63892	1.98608	2.22125	-0.746919	0.595875	5.49545e-05	0.000906599	4.26	-0.256278	0.837245	0.0769383	0.216471	-1.11363	0.462129	4.97799e-07	8.40439e-06
ENSG00000163808	KIF15	5.48014	5.45165	5.51471	5.00326	5.05188	5.10209	4.56587	4.61468	4.44092	4.29119	4.15806	3.9845	-0.429769	0.74238	5.58225e-05	0.000919918	4.25319	-0.94168	0.520626	2.47766e-09	4.1279e-07	-1.33658	0.395957	1.54788e-11	3.67968e-09
ENSG00000133943	C14orf159	4.51942	4.55876	4.2705	4.94625	4.90258	4.97353	4.38512	4.49793	4.30155	4.99848	4.81476	4.73696	0.490597	1.40503	5.59475e-05	0.000920977	4.25222	-0.0553485	0.962362	0.570317	0.767823	0.400576	1.32004	0.000451248	0.00215952
ENSG00000184481	FOXO4	3.28547	3.29594	3.18435	2.78417	2.56513	2.85087	3.5953	3.48741	3.74347	3.26569	3.12788	3.27498	-0.522245	0.696288	5.61941e-05	0.000924033	4.25031	0.353365	1.27754	0.00139647	0.0116393	-0.0327832	0.977533	0.734094	0.833879
ENSG00000087448	KLHDC5	5.3359	5.14402	5.47428	5.80691	5.82476	5.82518	5.1197	5.17713	5.30556	5.43632	5.5184	5.55305	0.501354	1.41554	5.62944e-05	0.000924679	4.24954	-0.116681	0.922307	0.247525	0.473351	0.184775	1.13664	0.0701	0.136395
ENSG00000184363	PKP3	5.25802	5.387	5.21384	6.00633	5.8622	5.75491	5.35638	5.18535	5.15424	5.97927	5.86724	5.63197	0.588148	1.50332	5.6616e-05	0.000928956	4.24706	-0.0546418	0.962833	0.639107	0.81696	0.54035	1.45433	0.000139604	0.000823235
ENSG00000167676	PLIN4	0.225597	0.774872	0.791471	1.72655	1.76201	1.42762	1.03914	0.787639	0.587856	1.87347	1.58753	1.85315	1.04169	2.05864	5.67475e-05	0.000930108	4.24605	0.207563	1.15474	0.314516	0.546949	1.17404	2.25643	1.34828e-05	0.000122256
ENSG00000136738	STAM	5.80519	5.63044	5.83159	6.10428	6.15388	6.14833	5.76145	5.80946	5.92766	6.0492	6.05491	6.07583	0.379962	1.30131	5.69105e-05	0.000931772	4.24481	0.0774242	1.05513	0.301305	0.532812	0.304418	1.23492	0.00053929	0.00249198
ENSG00000049245	VAMP3	6.98766	6.99047	6.87712	6.60921	6.58798	6.6148	7.058	7.1012	6.94559	6.75026	6.75688	6.67082	-0.347908	0.785723	5.76718e-05	0.000943217	4.23904	0.0829899	1.05921	0.21551	0.434719	-0.225734	0.85516	0.00295359	0.0101803
ENSG00000120327	PCDHB14	0.379983	0.343678	0.405491	-0.273796	-0.613996	-0.637796	0.127752	0.324467	0.681319	-0.34347	-0.296131	-0.167407	-0.884812	0.541558	5.77984e-05	0.000944268	4.23808	0.00159661	1.00111	0.99238	1	-0.645476	0.639282	0.00119147	0.00480808
ENSG00000198168	SVIP	5.49073	5.52692	5.48508	5.14962	5.11278	5.13098	5.09196	5.12836	4.86187	4.85713	4.83949	4.64963	-0.369823	0.773878	5.79935e-05	0.000945788	4.23662	-0.473723	0.720104	3.33165e-06	0.000106756	-0.718246	0.607836	1.25905e-08	4.93227e-07
ENSG00000204789	ZNF204P	3.90505	3.9802	4.16208	3.37437	3.42968	3.51431	4.021	3.94991	4.22014	3.17988	3.28869	3.53023	-0.576074	0.670787	5.80161e-05	0.000945788	4.23645	0.0484837	1.03418	0.647493	0.822425	-0.68349	0.622657	8.40591e-06	8.25401e-05
ENSG00000164867	NOS3	3.54709	3.60814	3.54467	4.23281	4.06019	3.9933	3.57761	3.56893	3.58556	4.12814	4.30098	3.95404	0.528968	1.4429	5.81596e-05	0.000947107	4.23538	0.0106388	1.0074	0.919292	0.982059	0.561733	1.47604	2.80075e-05	0.000220682
ENSG00000234741	GAS5	6.60921	6.85621	6.90751	6.05601	6.14372	6.32967	7.12136	6.95719	6.89246	6.63729	6.59532	7.00814	-0.61459	0.653116	5.83893e-05	0.000949829	4.23367	0.199415	1.14823	0.0931418	0.246659	-0.0447189	0.969479	0.697307	0.806265
ENSG00000138074	SLC5A6	6.60769	6.58058	6.42618	6.22951	6.22779	6.11969	6.45541	6.46527	6.34998	6.15707	6.10292	6.02843	-0.345937	0.786797	5.89754e-05	0.000958335	4.22933	-0.114862	0.92347	0.0940472	0.248276	-0.441977	0.736125	3.32426e-06	3.8709e-05
ENSG00000116984	MTR	5.42352	5.26174	5.50101	6.10619	6.13661	6.09662	5.24716	5.13504	5.2178	5.57552	5.62111	5.77812	0.718062	1.64497	5.90926e-05	0.000959211	4.22847	-0.195106	0.873509	0.187229	0.396393	0.262708	1.19973	0.0745217	0.14327
ENSG00000125266	EFNB2	7.9274	7.75722	7.71536	7.47636	7.48444	7.32917	7.63788	7.72172	7.66201	7.16085	7.14964	7.08819	-0.369977	0.773795	5.9531e-05	0.000965294	4.22526	-0.126199	0.916243	0.0869344	0.235401	-0.667054	0.629792	3.34542e-08	1.04148e-06
ENSG00000197816	C9orf174	2.75232	2.69801	2.5394	2.08223	1.81376	2.06012	2.85583	2.38886	2.57504	1.97661	1.56384	1.99188	-0.678234	0.62493	5.96462e-05	0.000965509	4.22442	-0.0571202	0.961181	0.650834	0.824404	-0.819706	0.566557	6.94539e-06	7.09084e-05
ENSG00000065548	ZC3H15	7.66996	7.69974	7.75118	7.35698	7.48369	7.47345	7.46302	7.46502	7.56129	7.29185	7.27438	7.34227	-0.26892	0.829941	5.96717e-05	0.000965509	4.22423	-0.210423	0.864284	0.00067566	0.00661736	-0.404164	0.755674	4.01031e-07	7.10285e-06
ENSG00000135454	B4GALNT1	5.07957	5.18841	4.8828	4.64098	4.62968	4.57752	5.25115	5.23007	5.37532	4.84175	4.87357	4.63257	-0.434645	0.739876	6.00732e-05	0.000970881	4.22132	0.234801	1.17674	0.00852846	0.0453843	-0.267472	0.830774	0.00425162	0.0137117
ENSG00000179292	TMEM151A	1.20926	1.20317	1.51141	2.01469	2.0349	1.8151	1.71618	1.60871	1.48376	2.14443	2.26806	2.06347	0.647365	1.5663	6.01839e-05	0.000970881	4.22052	0.295085	1.22696	0.0295598	0.111205	0.851236	1.80405	1.96105e-06	2.54987e-05
ENSG00000227403	AC009299.3	1.81798	1.99596	1.9099	2.59031	2.76295	2.67052	2.26628	2.36553	1.81561	2.60246	2.84097	2.58273	0.766547	1.70119	6.02014e-05	0.000970881	4.22039	0.240877	1.18171	0.125537	0.302136	0.767644	1.70249	5.75051e-05	0.00039828
ENSG00000119906	FAM178A	6.56949	6.47449	6.69726	7.02694	7.12853	7.13628	6.1312	6.31949	6.22405	6.41713	6.54518	6.77402	0.517041	1.43102	6.02598e-05	0.000970881	4.21997	-0.355203	0.78176	0.0027598	0.0196531	-0.00205198	0.998579	0.983852	0.998819
ENSG00000095203	EPB41L4B	4.76996	4.82226	4.88409	5.15738	5.208	5.16341	4.4884	4.62312	4.78036	4.83735	4.82807	4.81825	0.350978	1.27543	6.05923e-05	0.000975201	4.21758	-0.194483	0.873886	0.0116146	0.0569131	0.0026512	1.00184	0.969245	0.998819
ENSG00000151116	UEVLD	4.07545	3.98949	4.18666	4.53031	4.55706	4.68005	4.12287	4.04733	4.21835	4.4198	4.50245	4.6697	0.505453	1.41957	6.07582e-05	0.000976834	4.2164	0.046103	1.03247	0.646747	0.821836	0.446408	1.36264	0.000223655	0.00121535
ENSG00000145293	ENOPH1	6.88214	6.90067	6.82476	6.48476	6.57137	6.56035	6.62479	6.57831	6.54287	6.47182	6.3763	6.22373	-0.330505	0.795258	6.09778e-05	0.000978614	4.21483	-0.287329	0.819418	0.000255927	0.00323576	-0.511519	0.701484	2.86605e-07	5.38441e-06
ENSG00000205423	CNEP1R1	4.43288	4.55532	4.492	3.72502	3.86825	4.12944	4.52816	4.63257	4.4532	3.98276	3.9813	4.2191	-0.586405	0.666	6.0998e-05	0.000978614	4.21468	0.0444441	1.03129	0.68162	0.84539	-0.433221	0.740607	0.00101854	0.00421964
ENSG00000174282	ZBTB4	5.24659	5.13675	5.26315	5.6025	5.58029	5.59855	5.4769	5.58767	5.75158	5.82642	5.85754	5.91111	0.378458	1.29995	6.12541e-05	0.000981684	4.21286	0.390201	1.31058	4.34777e-05	0.000798989	0.649529	1.56866	5.04662e-08	1.39381e-06
ENSG00000169504	CLIC4	7.92321	7.86751	7.89791	8.34581	8.35614	8.33529	7.94536	8.13983	7.74983	8.28933	8.35145	8.37359	0.449556	1.36562	6.17848e-05	0.000989145	4.20912	0.0487369	1.03436	0.580427	0.775727	0.441829	1.35833	7.36238e-05	0.000487215
ENSG00000134247	PTGFRN	6.98385	6.86776	6.86463	6.61455	6.58669	6.53376	6.8585	6.84515	7.00126	6.58369	6.61696	6.47003	-0.327055	0.797162	6.21316e-05	0.000992597	4.20669	-0.00375263	0.997402	0.951926	0.999569	-0.3483	0.785509	3.03768e-05	0.000235804
ENSG00000198740	ZNF652	4.79731	4.6195	4.90174	5.44542	5.4019	5.51994	4.68997	4.89451	4.87728	5.23931	5.31732	5.62848	0.683286	1.60579	6.21683e-05	0.000992597	4.20643	0.048318	1.03406	0.724012	0.871248	0.621699	1.53869	0.000169311	0.000962076
ENSG00000196418	ZNF124	4.28225	4.21054	4.21546	3.68341	3.66301	3.66301	4.06084	4.08771	4.03149	3.4863	3.59422	3.75674	-0.566274	0.675359	6.21969e-05	0.000992597	4.20623	-0.176118	0.885081	0.11073	0.277667	-0.624505	0.648642	2.07652e-05	0.000173169
ENSG00000145331	TRMT10A	5.15192	5.04868	5.15659	4.65176	4.80742	4.71556	4.94715	5.04009	5.04129	4.6042	4.65531	4.6274	-0.39403	0.761001	6.29517e-05	0.00100359	4.20099	-0.109353	0.927004	0.155822	0.350612	-0.489973	0.712038	5.10467e-06	5.46553e-05
ENSG00000107758	PPP3CB	5.53323	5.47463	5.45666	5.74471	5.79033	5.76069	5.6533	5.59707	5.56122	5.71181	5.73591	5.75827	0.277015	1.21169	6.30291e-05	0.00100377	4.20046	0.115594	1.08342	0.0439153	0.146967	0.247012	1.18675	0.000207122	0.0011423
ENSG00000235109	ZNF323	3.12788	3.08488	3.11085	3.55993	3.46076	3.63261	3.31023	3.38405	3.34201	3.63856	3.70645	3.80334	0.443124	1.35954	6.3174e-05	0.00100502	4.19946	0.237605	1.17903	0.0128052	0.0614366	0.607783	1.52392	1.17574e-06	1.69765e-05
ENSG00000154803	FLCN	3.59936	3.63696	3.86917	2.91926	3.03513	3.06072	3.82899	3.84679	3.7996	2.90673	2.82668	3.33483	-0.696434	0.617095	6.33533e-05	0.00100681	4.19823	0.123778	1.08958	0.337017	0.568797	-0.680026	0.624154	7.79753e-05	0.000509123
ENSG00000124762	CDKN1A	8.37063	8.41444	8.26163	7.99118	7.9116	7.87785	10.9103	10.9666	10.9103	10.7938	10.8746	11.0905	-0.422097	0.746339	6.38038e-05	0.00101229	4.19515	2.58007	5.97968	2.43381e-17	3.6899e-13	2.57024	5.93907	2.55596e-17	2.8647e-13
ENSG00000101557	USP14	7.07945	7.01623	7.11381	6.81757	6.81516	6.7941	7.00417	7.06605	7.01194	6.76805	6.82276	6.70812	-0.260768	0.834644	6.38318e-05	0.00101229	4.19496	-0.0423479	0.971073	0.401864	0.63164	-0.303262	0.810418	1.12751e-05	0.000105195
ENSG00000111664	GNB3	1.0005	1.05352	1.35615	0.527752	0.389328	0.510315	0.775863	0.57403	0.617664	0.378466	0.00758425	0.179609	-0.66072	0.632563	6.39898e-05	0.00101374	4.19389	-0.480685	0.716637	0.00132375	0.0111249	-0.947871	0.518397	8.36103e-07	1.28586e-05
ENSG00000075891	PAX2	1.01019	1.00642	0.810253	1.49038	1.70968	1.29792	0.64928	0.723936	0.749117	1.41912	1.27688	1.46917	0.557048	1.47126	6.45957e-05	0.00102227	4.1898	-0.234953	0.849713	0.0442687	0.147865	0.445864	1.36213	0.000607291	0.00274185
ENSG00000131471	AOC3	2.25123	1.97851	2.54685	1.43838	1.6205	1.3895	2.65643	2.48645	2.62929	1.70793	1.89152	1.81294	-0.775159	0.584324	6.4823e-05	0.001024	4.18827	0.332718	1.25938	0.0298972	0.112057	-0.453983	0.730024	0.00636122	0.01909
ENSG00000173692	PSMD1	8.43081	8.393	8.46053	8.12205	8.18833	8.16267	8.40111	8.38948	8.47696	8.17292	8.20621	8.07745	-0.270386	0.829098	6.48761e-05	0.001024	4.18792	-0.00551598	0.996184	0.915466	0.980044	-0.2757	0.826049	5.16401e-05	0.000364996
ENSG00000160293	VAV2	5.84009	5.80761	5.64126	6.32331	6.22838	6.04547	5.72942	5.59954	5.79162	6.16893	6.13213	6.12798	0.436042	1.35289	6.49077e-05	0.001024	4.1877	-0.0563401	0.961701	0.51679	0.727885	0.37984	1.3012	0.000271138	0.00141847
ENSG00000114529	C3orf52	4.8083	4.93867	4.92687	4.52131	4.52171	4.55117	4.9749	4.88482	5.01856	4.60162	4.4514	4.6485	-0.359884	0.779227	6.50771e-05	0.00102561	4.18657	0.0682234	1.04842	0.32159	0.553545	-0.324357	0.798654	0.000182296	0.00102552
ENSG00000197142	ACSL5	8.83524	8.7745	8.76324	9.03064	8.9995	9.07467	8.60377	8.56744	8.54069	8.75525	8.7578	8.69638	0.24389	1.18418	6.56297e-05	0.00103324	4.1829	-0.220401	0.858327	0.000216576	0.00285275	-0.0544543	0.962959	0.261895	0.38853
ENSG00000132329	RAMP1	2.55629	2.81763	2.80765	3.82529	3.50297	3.46793	2.48541	2.65312	2.24258	3.59033	3.53766	3.21043	0.872011	1.83021	6.59027e-05	0.00103646	4.1811	-0.266891	0.831109	0.153734	0.347816	0.720272	1.64749	0.000483	0.00227586
ENSG00000110080	ST3GAL4	3.16821	3.30811	3.13549	3.91348	3.65253	3.83609	2.64726	2.78513	2.75977	3.45423	3.57419	3.29737	0.596491	1.51203	6.64304e-05	0.0010431	4.17763	-0.47344	0.720245	0.00121646	0.0104138	0.238352	1.17964	0.056245	0.114032
ENSG00000129250	KIF1C	8.19384	8.11877	8.06244	8.5282	8.37251	8.44916	8.20803	8.19995	8.40548	8.594	8.50999	8.51783	0.32489	1.25257	6.64624e-05	0.0010431	4.17742	0.146126	1.10659	0.0317431	0.117294	0.415594	1.33385	3.47687e-06	4.01162e-05
ENSG00000163738	MTHFD2L	4.31717	4.398	4.52784	3.67666	3.86677	3.94057	4.43162	4.40155	4.18598	3.78056	3.97986	3.59813	-0.586326	0.666037	6.70115e-05	0.00105063	4.17385	-0.0744846	0.949681	0.500623	0.715642	-0.627034	0.647506	3.15939e-05	0.000243516
ENSG00000110696	C11orf58	7.23315	7.30085	7.2895	7.50772	7.53407	7.6196	7.30996	7.26073	7.15029	7.56411	7.595	7.56911	0.27923	1.21355	6.7231e-05	0.00105298	4.17243	-0.0342254	0.976556	0.535097	0.741215	0.301588	1.2325	2.77344e-05	0.00021902
ENSG00000178105	DDX10	6.97193	6.94136	6.97162	6.62897	6.68767	6.70154	6.82276	6.7232	6.89058	6.58408	6.57649	6.54198	-0.288929	0.818509	6.84702e-05	0.00107109	4.1645	-0.149393	0.90163	0.0147463	0.0678548	-0.394008	0.761012	1.72204e-06	2.28616e-05
ENSG00000254706	RP11-565P22.6	0.239891	0.228455	-0.153647	0.84442	0.84725	1.02504	0.181432	0.221258	0.432138	0.625365	0.936623	0.266547	0.800393	1.74158	6.85344e-05	0.00107109	4.16409	0.173225	1.12758	0.280556	0.50919	0.504853	1.41898	0.00446221	0.0142725
ENSG00000166068	SPRED1	5.93183	5.76235	6.01271	6.27938	6.28709	6.37766	5.91664	6.08798	6.0116	6.22747	6.29017	6.29666	0.412622	1.3311	6.86623e-05	0.00107109	4.16328	0.103438	1.07433	0.214603	0.43348	0.369318	1.29174	0.000217169	0.0011882
ENSG00000138346	DNA2	4.97408	4.86797	4.93702	4.2646	4.47316	4.52553	4.36457	4.41784	4.08789	3.59966	3.72977	3.55774	-0.505463	0.704434	6.86698e-05	0.00107109	4.16323	-0.636378	0.643326	5.23304e-06	0.000155261	-1.29695	0.406985	4.06324e-10	4.00018e-08
ENSG00000157227	MMP14	3.88097	3.85473	4.00887	4.39	4.25575	4.35151	4.28917	4.29159	4.47758	4.73585	4.80022	4.88163	0.417879	1.33596	6.89595e-05	0.00107421	4.16141	0.438372	1.35507	4.01344e-05	0.000752136	0.890957	1.85441	1.83822e-09	1.22636e-07
ENSG00000230606	AC159540.1	1.66517	1.94195	1.99694	0.543909	0.432138	0.853458	1.14815	1.66624	1.68155	0.648006	0.723206	0.730123	-1.25817	0.418073	6.90114e-05	0.00107421	4.16108	-0.369093	0.774269	0.136992	0.321571	-1.16749	0.445195	0.000147309	0.000861634
ENSG00000147324	MFHAS1	6.08685	6.00832	6.09378	6.38418	6.36856	6.33918	5.89347	6.02136	6.07286	6.15763	6.12081	6.15049	0.301123	1.2321	6.93058e-05	0.00107751	4.15923	-0.0669136	0.954678	0.270661	0.49855	0.0800785	1.05708	0.187071	0.298964
ENSG00000160285	LSS	6.53146	6.52575	6.46486	7.08	6.89903	6.94747	6.55986	6.57882	6.53296	7.05691	6.92439	7.10052	0.468128	1.38331	6.93652e-05	0.00107751	4.15886	0.0497619	1.03509	0.593508	0.785593	0.519678	1.43363	2.05265e-05	0.000171461
ENSG00000112183	RBM24	1.86374	2.08879	1.86573	2.6658	2.40108	2.91247	2.25477	1.94755	2.53626	2.90254	2.92895	2.92941	0.719726	1.64687	7.00297e-05	0.00108671	4.15472	0.306719	1.23689	0.0446272	0.148539	0.980576	1.97325	1.38142e-06	1.94825e-05
ENSG00000120925	RNF170	3.08415	3.05581	2.91059	3.49628	3.39128	3.50523	2.63025	2.70011	2.7617	3.22955	3.19065	3.21043	0.447061	1.36326	7.02843e-05	0.00108955	4.15314	-0.319719	0.801226	0.00249043	0.0182139	0.193084	1.1432	0.0404752	0.0873391
ENSG00000204267	TAP2	6.39388	6.30751	6.32417	6.11123	6.01545	6.05011	6.30427	6.30537	6.32238	6.07259	6.08108	5.99447	-0.282898	0.821938	7.06597e-05	0.00109425	4.15083	-0.0311775	0.978621	0.56997	0.767823	-0.292298	0.8166	4.84353e-05	0.000347364
ENSG00000105219	CNTD2	2.11721	1.86972	1.92035	2.54504	2.6266	2.54504	2.12752	2.30669	1.97126	2.78132	2.85288	2.65009	0.60315	1.51903	7.12914e-05	0.00110291	4.14696	0.165949	1.1219	0.1808	0.388149	0.792796	1.73243	2.37073e-06	2.97047e-05
ENSG00000101782	RIOK3	6.07955	6.0979	6.17177	5.55787	5.55125	5.69862	6.53645	6.79878	6.7098	6.07936	6.00097	6.42905	-0.513862	0.700345	7.20518e-05	0.00111353	4.14236	0.565436	1.47983	1.40451e-05	0.000334808	0.0526744	1.03719	0.591208	0.716777
ENSG00000259803	SLC22A31	0.225597	0.219807	0.224994	0.926068	1.3008	0.736871	0.331165	0.0490762	-0.0255485	0.723206	1.27688	0.958308	0.764577	1.69887	7.24496e-05	0.00111854	4.13996	-0.105292	0.929617	0.492035	0.709979	0.76258	1.69652	7.3722e-05	0.000487449
ENSG00000181026	AEN	7.24532	7.20978	7.11575	6.9679	6.83781	6.83676	7.94946	7.95213	7.83275	7.86369	7.73092	7.81361	-0.309501	0.806921	7.25585e-05	0.00111908	4.13931	0.721003	1.64833	4.66647e-10	1.05595e-07	0.612356	1.52875	5.8286e-09	2.75288e-07
ENSG00000174791	RIN1	3.65518	3.63169	3.49916	4.41244	4.39109	4.16047	4.12081	4.05344	4.11919	4.96877	5.13041	4.77361	0.72604	1.65409	7.34128e-05	0.00113111	4.13423	0.502188	1.41636	0.00253032	0.0184611	1.36269	2.57164	1.23229e-08	4.8653e-07
ENSG00000119125	GDA	6.1988	6.20292	6.72893	6.96481	7.0146	7.19852	6.31222	6.32599	6.77177	6.95152	7.0375	7.18055	0.682965	1.60544	7.37334e-05	0.0011349	4.13234	0.094033	1.06735	0.495841	0.712824	0.679957	1.60209	7.5948e-05	0.000498462
ENSG00000112769	LAMA4	3.64208	3.6125	3.74292	4.25347	4.29458	4.1273	3.6396	3.4971	3.69227	4.15456	4.17658	4.17441	0.559729	1.47399	7.38516e-05	0.00113556	4.13164	-0.0558646	0.962018	0.626219	0.80794	0.502895	1.41705	0.000225227	0.0012217
ENSG00000134996	OSTF1	5.08601	5.09775	4.95175	4.59798	4.55382	4.62283	4.88956	4.85194	4.86021	4.79054	4.73746	4.76637	-0.453947	0.730043	7.45034e-05	0.00114442	4.12782	-0.178223	0.883791	0.0540769	0.170095	-0.280622	0.823236	0.00471946	0.0149222
ENSG00000188064	WNT7B	4.19651	4.15011	4.40768	4.83044	4.73834	4.66564	4.11919	4.2458	4.39411	4.7456	4.85134	4.85891	0.494072	1.40841	7.47005e-05	0.00114629	4.12668	0.00230613	1.0016	0.981618	1	0.567435	1.48189	1.43379e-05	0.00012817
ENSG00000007062	PROM1	4.6783	4.51971	4.83845	5.10251	5.10179	5.14754	4.68447	4.55964	4.71463	4.89673	4.80432	5.12237	0.438963	1.35563	7.50489e-05	0.00115047	4.12466	-0.0253149	0.982606	0.775479	0.901612	0.262118	1.19924	0.00697436	0.0205636
ENSG00000135480	KRT7	1.75256	2.24503	1.82096	2.84314	2.82848	2.85583	1.88188	1.31016	1.6922	2.87761	2.71115	2.25059	0.902509	1.86931	7.53956e-05	0.00115353	4.12265	-0.31191	0.805575	0.110865	0.277914	0.674914	1.5965	0.00133872	0.00529792
ENSG00000181035	SLC25A42	3.24735	3.32573	3.27092	3.83585	3.78528	3.86367	3.62376	3.39128	3.72844	4.08739	4.03912	4.021	0.546806	1.46085	7.54008e-05	0.00115353	4.12262	0.299857	1.23102	0.0125447	0.0604933	0.767944	1.70284	1.02153e-06	1.50073e-05
ENSG00000021826	CPS1	6.19485	6.01008	6.17065	6.45069	6.47581	6.4815	6.15788	6.10369	6.0904	6.34666	6.38118	6.39293	0.344282	1.26952	7.56681e-05	0.00115646	4.12109	-0.00773464	0.994653	0.910366	0.977249	0.248479	1.18795	0.00168118	0.00639288
ENSG00000168092	PAFAH1B2	7.74741	7.7362	7.81243	8.03246	8.07041	8.08092	7.83498	7.901	7.93617	8.04284	8.01367	8.10806	0.295961	1.2277	7.61388e-05	0.00116169	4.11839	0.125474	1.09087	0.043784	0.146704	0.289468	1.22219	9.51961e-05	0.000599364
ENSG00000082153	BZW1	9.84448	9.87727	9.98204	9.5768	9.61653	9.70748	9.66628	9.74263	9.59479	9.36306	9.40601	9.42155	-0.267632	0.830682	7.61636e-05	0.00116169	4.11825	-0.233292	0.850691	0.000307302	0.00373318	-0.504359	0.704974	2.3064e-08	7.75081e-07
ENSG00000085382	HACE1	4.06496	4.10292	4.37163	3.55993	3.56082	3.80501	4.17804	4.26151	4.33874	3.57791	3.67493	3.80751	-0.537672	0.688882	7.74297e-05	0.00117981	4.11109	0.0802835	1.05723	0.432629	0.659337	-0.493155	0.71047	0.000177836	0.00100454
ENSG00000205810	KLRC3	0.846251	0.821241	0.652771	0.082457	0.193757	0.310962	0.602024	0.866062	0.461797	0.146747	0.25605	0.0363436	-0.577876	0.669949	7.8032e-05	0.00118779	4.10773	-0.130275	0.913658	0.257678	0.484933	-0.627028	0.647509	3.16281e-05	0.000243655
ENSG00000160051	IQCC	2.90459	2.94705	2.73307	2.23918	2.31147	2.42827	1.95207	1.9008	1.71586	1.66444	1.79805	1.60714	-0.535851	0.689752	7.81269e-05	0.00118805	4.1072	-1.00582	0.497987	3.41508e-08	2.96251e-06	-1.17194	0.443824	3.81558e-09	2.00469e-07
ENSG00000143157	POGK	6.84539	6.69155	6.68127	7.11286	7.09751	6.99379	6.64331	6.62501	6.65173	6.84799	6.81046	6.84931	0.328678	1.25586	7.83323e-05	0.00118846	4.10606	-0.099444	0.933393	0.144191	0.333396	0.0964311	1.06913	0.151971	0.253804
ENSG00000105552	BCAT2	5.61522	5.8006	5.50412	5.28205	5.12637	5.13292	5.67477	5.6559	5.64496	5.26174	5.22839	5.21202	-0.459789	0.727093	7.83688e-05	0.00118846	4.10586	0.0181672	1.01267	0.837156	0.937741	-0.406202	0.754607	0.000263462	0.00138741
ENSG00000135842	FAM129A	2.01672	1.9347	1.77053	2.46175	2.68784	2.48603	1.71618	2.25182	1.96131	2.17806	2.19455	2.41128	0.63771	1.55586	7.83895e-05	0.00118846	4.10574	0.0689764	1.04897	0.59595	0.78725	0.353123	1.27732	0.0118826	0.0318684
ENSG00000099812	C19orf21	6.2579	6.23799	6.34971	6.9679	6.85464	6.75844	6.16136	6.17029	6.35258	6.92033	6.99187	6.70699	0.578755	1.49356	7.8472e-05	0.00118852	4.10529	-0.0535554	0.963559	0.648699	0.823351	0.591812	1.50714	6.00479e-05	0.000412686
ENSG00000174564	IL20RB	0.729672	0.272011	0.565884	1.43838	1.95146	1.25437	0.521415	0.855301	0.905637	1.73685	1.97033	1.52752	1.02583	2.03613	7.86469e-05	0.00118999	4.10432	0.238444	1.17972	0.256098	0.482863	1.22302	2.33435	9.67293e-06	9.28761e-05
ENSG00000131746	TNS4	5.94566	5.84165	5.7531	6.60857	6.51637	6.35736	5.45534	5.44466	5.51951	6.16249	6.06812	5.8024	0.647331	1.56627	7.87272e-05	0.00119001	4.10388	-0.373765	0.771766	0.0113369	0.0558411	0.164777	1.12099	0.215609	0.333931
ENSG00000188177	ZC3H6	2.05889	1.9347	2.23918	2.87593	3.01229	3.17934	2.04375	2.2028	2.06142	2.72332	2.79984	3.19704	0.945002	1.92519	7.885e-05	0.00119045	4.1032	0.0254852	1.01782	0.896688	0.970148	0.82813	1.77538	0.000315403	0.00161385
ENSG00000176771	NCKAP5	-0.0472369	-0.0493451	0.0924797	0.6745	0.764357	0.867263	0.377627	-0.00679002	0.566553	0.566399	1.14268	1.03571	0.770076	1.70536	7.8913e-05	0.00119045	4.10285	0.313951	1.24311	0.0529469	0.167829	0.916038	1.88693	1.03986e-05	9.83487e-05
ENSG00000159352	PSMD4	7.56529	7.6179	7.37405	7.07126	7.08647	7.06911	7.58249	7.49351	7.44701	7.20004	7.1471	7.10434	-0.4437	0.735246	7.91462e-05	0.00119278	4.10157	-0.0116922	0.991928	0.892102	0.968914	-0.368678	0.774492	0.000482381	0.00227477
ENSG00000116459	ATP5F1	8.30173	8.40388	8.38115	7.97852	8.05607	8.07041	8.38115	8.27046	8.17163	8.20621	8.17006	8.15911	-0.327298	0.797028	7.93618e-05	0.00119484	4.10039	-0.0878991	0.940892	0.181993	0.389663	-0.183732	0.880423	0.00981981	0.0272521
ENSG00000104356	POP1	6.93673	6.75966	6.89747	6.5233	6.59503	6.50976	6.91086	6.96307	6.87437	6.46736	6.54862	6.41261	-0.321769	0.800088	7.97919e-05	0.00120012	4.09804	0.0515879	1.0364	0.41407	0.643027	-0.388132	0.764118	9.42461e-06	9.09526e-05
ENSG00000196792	STRN3	5.93044	5.78156	6.20307	6.4049	6.48635	6.52975	6.1393	6.14172	6.30154	6.36589	6.39914	6.53753	0.502429	1.4166	8.05974e-05	0.00121104	4.09368	0.223115	1.16725	0.0376496	0.132437	0.462692	1.37811	0.000189175	0.00105716
ENSG00000171202	TMEM126A	3.92545	4.00847	3.83299	3.27498	3.53686	3.23343	3.89803	3.72347	3.61812	3.52792	3.54949	3.42879	-0.574054	0.671727	8.09378e-05	0.00121495	4.09185	-0.176276	0.884984	0.123254	0.298221	-0.420212	0.747315	0.00137596	0.00542404
ENSG00000188157	AGRN	4.67665	4.57706	4.90963	5.49548	5.51042	5.16555	5.20895	5.18473	5.10308	5.7286	5.94716	5.75957	0.670345	1.59145	8.12881e-05	0.00121759	4.08997	0.445027	1.36134	0.00363106	0.024198	1.09135	2.13073	1.41501e-07	2.99623e-06
ENSG00000151690	MFSD6	4.59972	4.40426	4.54178	5.12299	4.96611	5.13755	4.77014	4.78087	5.03279	4.95039	4.99416	5.3382	0.560416	1.47469	8.13458e-05	0.00121759	4.08966	0.346377	1.27136	0.00603118	0.0351687	0.578091	1.49287	5.58304e-05	0.000388634
ENSG00000257499	RP11-571M6.8	1.63322	1.57536	1.29336	1.02541	0.735022	0.783673	1.84325	1.32356	1.60388	1.15021	1.17766	1.06236	-0.652784	0.636052	8.1355e-05	0.00121759	4.08962	0.0892918	1.06385	0.48468	0.704637	-0.370703	0.773405	0.00919098	0.0257807
ENSG00000169612	FAM103A1	5.25204	5.33613	5.13721	4.91613	4.86469	4.89431	5.34386	5.4921	5.3659	5.09599	5.16579	5.24144	-0.35038	0.784378	8.16385e-05	0.00122048	4.0881	0.158518	1.11614	0.0286011	0.108759	-0.0747133	0.949531	0.280156	0.409195
ENSG00000114209	PDCD10	6.21895	6.25766	6.33115	5.79862	5.89347	6.01297	6.10664	6.1804	6.07635	5.73699	5.64364	5.81043	-0.367624	0.775058	8.17089e-05	0.00122048	4.08773	-0.148029	0.902483	0.0522761	0.166259	-0.53902	0.688238	8.60021e-07	1.31572e-05
ENSG00000175115	PACS1	5.76867	5.74287	5.48769	6.16956	6.13764	5.95781	5.48144	5.42912	5.51471	5.98519	5.91813	5.78803	0.421712	1.33952	8.18799e-05	0.00122183	4.08682	-0.191696	0.875576	0.0367987	0.130199	0.230712	1.17341	0.0125641	0.03343
ENSG00000197265	GTF2E2	6.05011	6.06298	6.10496	6.45641	6.49292	6.5278	6.06298	5.95814	6.15722	6.53553	6.56458	6.40312	0.419702	1.33765	8.20789e-05	0.0012236	4.08577	-0.0131233	0.990945	0.876871	0.959846	0.428757	1.34607	6.35178e-05	0.000432223
ENSG00000144597	EAF1	6.46324	6.41959	6.50412	6.0832	6.09444	6.05139	6.77654	6.81623	6.81332	6.33208	6.35535	6.49701	-0.385841	0.765333	8.22504e-05	0.00122495	4.08486	0.339826	1.2656	0.000220482	0.00289163	-0.0677448	0.954128	0.373068	0.509053
ENSG00000213380	COG8	4.89412	4.84514	4.81889	5.45192	5.37845	5.15847	4.82377	4.72823	4.8386	5.26891	5.27429	5.11981	0.477126	1.39197	8.25695e-05	0.00122849	4.08318	-0.0559082	0.961989	0.568174	0.766348	0.368624	1.29112	0.00102876	0.00425569
ENSG00000147533	GOLGA7	5.64739	5.74097	5.71006	5.2668	5.30999	5.46149	5.74359	5.77846	5.7736	5.39642	5.45494	5.60052	-0.353597	0.78263	8.31201e-05	0.00123547	4.08029	0.0657436	1.04662	0.344447	0.576182	-0.215991	0.860955	0.00568957	0.0173805
ENSG00000156136	DCK	5.98894	6.11932	6.13213	5.62461	5.75827	5.78648	5.35052	5.34005	5.2455	4.90986	4.90738	4.74601	-0.357069	0.780749	8.33387e-05	0.00123751	4.07915	-0.768108	0.587187	4.7024e-09	6.70235e-07	-1.22515	0.427754	4.63849e-12	1.67438e-09
ENSG00000197070	ARRDC1	4.18372	4.15511	4.11796	4.76439	4.69694	4.48591	4.29458	4.25538	4.24774	4.83446	4.76335	4.81233	0.497066	1.41134	8.38106e-05	0.00124107	4.0767	0.113516	1.08186	0.270071	0.498111	0.651032	1.57029	3.06076e-06	3.63669e-05
ENSG00000131620	ANO1	7.3945	7.39841	7.18149	7.93218	7.86253	7.68708	7.16921	7.0614	6.99951	7.61132	7.5846	7.23608	0.502367	1.41654	8.38473e-05	0.00124107	4.07651	-0.248398	0.841831	0.0245735	0.0977751	0.152903	1.1118	0.141359	0.239672
ENSG00000166510	CCDC68	2.91926	2.93841	3.17261	3.57741	3.38463	3.54919	3.09255	3.02975	3.05893	3.29035	3.24028	3.41999	0.49409	1.40843	8.39639e-05	0.00124107	4.07591	0.0507717	1.03582	0.616062	0.80097	0.306771	1.23694	0.00582423	0.0177257
ENSG00000112972	HMGCS1	8.02405	7.99364	8.07947	8.38115	8.38948	8.4944	7.85405	8.09617	7.8878	8.08237	8.12027	8.32743	0.389296	1.30975	8.3986e-05	0.00124107	4.07579	-0.0863039	0.941933	0.279251	0.507959	0.144023	1.10498	0.0770623	0.147072
ENSG00000181830	SLC35C1	5.2338	5.15491	5.00636	5.72599	5.56693	5.42912	5.21223	5.23636	5.32487	5.69482	5.64896	5.67754	0.442277	1.35875	8.39874e-05	0.00124107	4.07579	0.125894	1.09118	0.170037	0.371729	0.541792	1.45578	7.54657e-06	7.59214e-05
ENSG00000075089	ACTR6	5.26869	5.45666	5.59842	4.91511	4.9147	5.14754	5.47582	5.44104	5.52796	5.00145	5.07957	5.23556	-0.448796	0.732654	8.42158e-05	0.00124323	4.07461	0.0406838	1.0286	0.639604	0.817212	-0.336046	0.792209	0.0012199	0.00490451
ENSG00000127528	KLF2	2.15337	2.10284	2.2519	3.14191	3.07786	2.69055	2.28956	2.47079	2.23373	3.16895	3.33942	2.74764	0.801525	1.74294	8.43414e-05	0.00124387	4.07396	0.162161	1.11896	0.332549	0.564399	0.917721	1.88913	1.65312e-05	0.000143872
ENSG00000129484	PARP2	6.11066	6.14578	6.26958	5.72264	5.73415	5.87157	5.49548	5.46082	5.49437	5.25517	5.25564	5.16976	-0.399184	0.758287	8.47592e-05	0.00124843	4.07181	-0.691605	0.619164	1.02955e-07	7.25334e-06	-0.948073	0.518324	1.14997e-09	8.63106e-08
ENSG00000123965	PMS2P5	1.45992	1.43838	1.45448	0.829481	1.06108	0.841632	1.21108	1.36202	1.53796	1.14857	1.10564	1.04374	-0.540164	0.687693	8.48155e-05	0.00124843	4.07152	-0.0804873	0.945738	0.45207	0.677189	-0.351496	0.783771	0.0038194	0.0125855
ENSG00000257923	CUX1	6.33665	6.26299	6.31423	6.59949	6.52459	6.63941	6.53584	6.58943	6.64769	6.82788	6.88378	6.88634	0.283199	1.21689	8.49599e-05	0.00124935	4.07079	0.286455	1.21964	7.50911e-05	0.0012321	0.561333	1.47563	9.68347e-09	4.07399e-07
ENSG00000185065	AC000068.5	0.234075	-0.0779079	-0.216063	0.726303	0.772548	0.920654	0.521415	0.193206	-0.0779079	0.407086	0.352519	0.379221	0.826283	1.77311	8.62047e-05	0.00126642	4.06447	0.231991	1.17445	0.174611	0.378562	0.399478	1.31903	0.0253876	0.0595914
ENSG00000055163	CYFIP2	6.62999	6.53146	6.54913	6.09378	6.09871	6.10176	7.82201	7.82665	8.14126	7.50228	7.4421	7.76443	-0.472126	0.720902	8.68118e-05	0.00127411	4.06142	1.35988	2.56664	1.25307e-11	6.4035e-09	0.998942	1.99853	1.84831e-09	1.22636e-07
ENSG00000212719	C17orf51	4.98452	5.06251	5.00477	4.61317	4.6103	4.71806	4.82446	4.89763	5.04847	4.50699	4.46747	4.62955	-0.370299	0.773622	8.69432e-05	0.0012748	4.06076	-0.0936802	0.937129	0.206464	0.42247	-0.483109	0.715434	4.12958e-06	4.59362e-05
ENSG00000169783	LINGO1	3.30437	3.47863	3.25547	3.70962	3.85162	3.79558	3.05442	2.77153	3.11556	3.23294	3.26468	3.27983	0.439009	1.35567	8.71331e-05	0.0012753	4.05982	-0.365958	0.775953	0.000861507	0.00802785	-0.0875063	0.941148	0.338613	0.473852
ENSG00000174842	GLMN	4.74203	4.92049	4.78387	4.31105	4.3953	4.47491	4.63232	4.71923	4.42914	4.16406	4.1881	4.12894	-0.422087	0.746344	8.71452e-05	0.0012753	4.05976	-0.222233	0.857238	0.0144504	0.0667528	-0.655139	0.635014	4.79511e-07	8.15922e-06
ENSG00000187676	B3GALTL	4.04336	4.05877	4.06722	3.49068	3.71242	3.73798	3.75442	3.75597	3.59794	3.42611	3.3456	3.45164	-0.409656	0.752803	8.74685e-05	0.00127853	4.05815	-0.353763	0.782541	0.000369844	0.00428358	-0.648801	0.63781	3.68103e-07	6.61233e-06
ENSG00000180921	FAM83H	6.43849	6.33686	6.29944	6.98406	6.85032	6.62063	6.82139	6.81717	6.83897	7.36836	7.4164	7.21496	0.460267	1.3758	8.75349e-05	0.00127853	4.05782	0.467501	1.38271	7.3854e-05	0.00121574	0.975181	1.96589	3.3364e-09	1.80654e-07
ENSG00000137824	FAM82A2	5.25512	5.2116	5.12504	5.51753	5.46166	5.50198	5.30372	5.32607	5.30766	5.61505	5.59092	5.60333	0.296295	1.22799	8.76611e-05	0.00127864	4.05719	0.115055	1.08302	0.0665483	0.196559	0.40568	1.32471	1.93424e-06	2.51933e-05
ENSG00000115540	MOB4	6.3325	6.3334	6.35535	5.91129	6.03594	6.11355	6.17072	6.20222	6.01411	5.86159	5.84412	5.88612	-0.320278	0.800916	8.77112e-05	0.00127864	4.05695	-0.211445	0.863672	0.00352801	0.0237198	-0.47651	0.718714	7.64338e-07	1.20209e-05
ENSG00000106443	PHF14	2.61712	2.74591	2.8877	1.9718	2.17148	2.33069	2.56173	2.47079	2.73904	2.0326	2.0428	2.018	-0.592249	0.663308	8.82504e-05	0.00128335	4.05428	-0.159277	0.895474	0.177998	0.383928	-0.718739	0.607628	1.02463e-05	9.72642e-05
ENSG00000146757	ZNF92	4.58248	4.5082	4.65507	4.91511	4.9365	4.96611	4.24013	4.38748	4.39411	4.54165	4.54152	4.6385	0.357535	1.28124	8.82683e-05	0.00128335	4.0542	-0.240976	0.846173	0.00418616	0.026812	-0.00807188	0.994421	0.911587	0.962137
ENSG00000172175	MALT1	6.68564	6.61121	6.85812	6.28783	6.32417	6.35861	6.23482	6.32255	6.41456	5.84724	5.77897	5.88274	-0.394541	0.760731	8.82994e-05	0.00128335	4.05404	-0.393968	0.761034	8.97214e-05	0.001414	-0.881828	0.54268	2.79836e-09	1.60098e-07
ENSG00000116489	CAPZA1	8.55272	8.58862	8.61775	8.29502	8.33529	8.39569	8.50999	8.49622	8.47951	8.26314	8.27046	8.393	-0.244389	0.844173	8.83724e-05	0.00128335	4.05368	-0.0910999	0.938807	0.073544	0.210258	-0.277656	0.82493	2.1182e-05	0.000175391
ENSG00000143319	ISG20L2	6.0466	6.02732	5.84536	5.69593	5.66969	5.65721	5.88925	5.93255	5.86072	5.58855	5.58901	5.59774	-0.299051	0.812787	8.89914e-05	0.0012911	4.05065	-0.079204	0.94658	0.191066	0.402214	-0.381615	0.767578	5.41164e-06	5.7657e-05
ENSG00000159256	MORC3	5.36294	5.19069	5.48014	5.86333	5.88235	5.95724	5.49904	5.69874	5.57327	5.88305	5.92376	6.11286	0.556726	1.47093	8.93572e-05	0.00129517	4.04887	0.246212	1.18609	0.0404125	0.139059	0.628574	1.54604	2.18353e-05	0.000179526
ENSG00000170955	PRKCDBP	1.25496	1.533	0.970572	2.27876	2.59157	2.03648	0.942007	0.906034	0.957833	2.50192	2.36718	1.64727	1.04944	2.06973	8.96778e-05	0.00129857	4.04732	-0.317903	0.802235	0.15947	0.356491	0.92116	1.89364	0.000349655	0.0017565
ENSG00000057608	GDI2	8.12589	8.23403	8.19384	7.9077	7.93218	7.93743	8.14287	8.14126	8.00415	7.93617	7.96572	7.92046	-0.258845	0.835757	9.14515e-05	0.00132299	4.03881	-0.0885522	0.940466	0.0988723	0.257561	-0.243777	0.844531	0.000167109	0.000952039
ENSG00000141655	TNFRSF11A	1.66517	1.54518	1.77053	0.631131	0.897676	1.13268	1.28731	1.403	1.83111	0.761725	0.946446	0.809893	-0.773133	0.585145	9.17789e-05	0.00132571	4.03726	-0.152821	0.89949	0.323041	0.555098	-0.820753	0.566146	4.79353e-05	0.00034443
ENSG00000187678	SPRY4	6.71466	6.60331	6.48972	6.15558	6.11846	5.97885	6.746	6.92843	6.6196	6.16155	6.19469	6.04443	-0.518296	0.698196	9.1814e-05	0.00132571	4.03709	0.161861	1.11873	0.120879	0.294355	-0.468911	0.72251	0.000244651	0.00130781
ENSG00000162441	LZIC	5.14599	5.16452	5.15216	5.42386	5.48963	5.48982	5.02835	5.11028	5.06514	5.27684	5.37237	5.27722	0.313479	1.2427	9.19723e-05	0.00132673	4.03634	-0.0862966	0.941938	0.189747	0.399883	0.154645	1.11315	0.0234454	0.0557754
ENSG00000143845	ETNK2	4.46164	4.6364	4.20357	3.97123	3.84122	4.02119	4.22987	4.2458	4.16962	3.89428	3.6609	3.64208	-0.490252	0.711901	9.21537e-05	0.00132808	4.03549	-0.219632	0.858785	0.0332148	0.120992	-0.701629	0.614878	1.49111e-06	2.04771e-05
ENSG00000175084	DES	1.36955	1.36212	1.03252	1.79412	1.91056	2.0729	1.14297	1.07463	1.42738	1.93159	1.94445	1.51414	0.670664	1.59181	9.27109e-05	0.00133425	4.03287	-0.0398981	0.972724	0.771479	0.899791	0.542588	1.45658	0.000757452	0.00330943
ENSG00000024862	CCDC28A	2.98135	3.20382	2.9982	2.418	2.56513	2.51652	3.23546	3.2498	3.18032	2.78132	2.80716	2.88329	-0.561614	0.677544	9.27578e-05	0.00133425	4.03265	0.160392	1.11759	0.147839	0.338528	-0.237798	0.848039	0.0420542	0.090156
ENSG00000076864	RAP1GAP	4.19263	4.09057	3.84909	4.45654	4.4806	4.49807	4.021	3.88073	4.0968	4.38158	4.25017	4.27281	0.433705	1.3507	9.31091e-05	0.00133803	4.03101	-0.0450687	0.969244	0.616649	0.801461	0.257113	1.19508	0.00837804	0.0239094
ENSG00000163297	ANTXR2	4.58628	4.43959	4.64406	5.00326	5.05087	4.9883	4.67155	4.69345	4.81496	4.9576	5.07504	5.15847	0.45788	1.37352	9.34199e-05	0.00133942	4.02956	0.17045	1.12541	0.081237	0.224792	0.506918	1.42101	2.8634e-05	0.0002247
ENSG00000150768	DLAT	7.46731	7.48517	7.47781	7.19943	7.23931	7.21243	7.34546	7.29905	7.27316	7.04755	7.09847	6.96832	-0.259713	0.835254	9.35136e-05	0.00133942	4.02913	-0.170903	0.888286	0.00382079	0.0251201	-0.438475	0.737914	1.46621e-07	3.09169e-06
ENSG00000116127	ALMS1	5.64475	5.42661	5.739	4.61317	4.82209	4.69575	5.2668	5.45247	5.40225	4.12081	4.26914	4.41374	-0.89276	0.538583	9.35734e-05	0.00133942	4.02885	-0.229161	0.853131	0.19294	0.404924	-1.33601	0.396115	1.0628e-06	1.55532e-05
ENSG00000173402	DAG1	7.71727	7.63146	7.46811	8.11877	8.03535	7.94798	7.60952	7.54709	7.51349	7.95636	7.85491	7.85293	0.428328	1.34567	9.36362e-05	0.00133942	4.02856	-0.0491358	0.966515	0.574814	0.771626	0.282387	1.21621	0.00394786	0.0129121
ENSG00000260916	CCPG1	3.20419	3.19966	3.34256	2.67612	2.64598	2.78384	3.53116	3.62215	3.55714	2.96419	2.8877	3.247	-0.546676	0.684596	9.36472e-05	0.00133942	4.0285	0.321646	1.24976	0.00574217	0.0337697	-0.216528	0.860634	0.0553398	0.112588
ENSG00000242629	RP11-89C21.2	0.729672	0.560989	0.719342	1.50332	1.58507	1.9395	0.377627	0.836902	0.324058	2.08151	1.47454	1.11902	1.00578	2.00803	9.47326e-05	0.00135367	4.0235	-0.157092	0.896831	0.452275	0.67743	0.889585	1.85264	0.000334338	0.00169812
ENSG00000104899	AMH	2.42707	2.34628	2.81903	2.00823	1.49407	1.75812	2.43055	2.72022	2.54015	1.53572	2.06012	1.98574	-0.776412	0.583817	9.51017e-05	0.00135766	4.02181	0.0337086	1.02364	0.821489	0.928339	-0.670131	0.62845	0.000389606	0.00191593
ENSG00000231528	FAM225A	1.20168	1.00642	0.936163	0.695901	0.395147	0.120762	0.722664	0.723936	0.527011	0.252229	0.502222	0.315942	-0.644039	0.639919	9.56561e-05	0.00136429	4.01929	-0.390338	0.762951	0.00677279	0.038429	-0.691364	0.619268	4.42205e-05	0.000322631
ENSG00000102890	ELMO3	3.423	3.48814	3.36561	4.17553	4.05047	4.05067	3.62376	3.60785	3.33021	4.0968	4.19934	3.93725	0.666547	1.58727	9.61125e-05	0.00136951	4.01722	0.0945906	1.06776	0.499111	0.714681	0.652635	1.57204	0.000117348	0.000716231
ENSG00000148180	GSN	5.7519	5.79948	5.54587	5.34213	5.25605	5.12219	5.87323	5.83869	5.70931	5.52308	5.6013	5.47234	-0.459092	0.727444	9.64282e-05	0.00137272	4.0158	0.107562	1.07741	0.239724	0.464645	-0.167017	0.890683	0.078519	0.14927
ENSG00000143365	RORC	-0.389205	-0.466997	-0.536049	0.251258	0.206907	0.113708	-0.508131	-0.645397	-0.25836	-0.0519282	-0.205445	0.274615	0.654717	1.57431	9.6874e-05	0.00137777	4.01379	-0.00654309	0.995475	0.960765	1	0.469491	1.38462	0.00213496	0.00777148
ENSG00000107789	MINPP1	4.48928	4.46237	4.80175	5.00996	5.08204	5.19739	4.63439	4.52278	4.64431	5.05458	5.22088	5.31732	0.512477	1.4265	9.74798e-05	0.00138483	4.01109	0.0167273	1.01166	0.874962	0.958732	0.613216	1.52966	1.17177e-05	0.000108788
ENSG00000140463	BBS4	3.5917	3.6125	3.63493	3.07652	3.04517	2.74815	4.05809	3.8729	3.74684	3.18435	3.25205	3.35706	-0.655957	0.634654	9.75529e-05	0.00138483	4.01076	0.279412	1.2137	0.0349283	0.125376	-0.349012	0.785121	0.0135677	0.03565
ENSG00000188042	ARL4C	4.86943	4.88202	4.86469	5.41336	5.31294	5.25512	4.46467	4.53553	4.74581	4.86057	4.91307	4.70064	0.455213	1.37099	9.76855e-05	0.00138542	4.01017	-0.28988	0.81797	0.00689088	0.0388298	-0.0467651	0.968105	0.62017	0.742334
ENSG00000121753	BAI2	2.14604	2.23796	2.51913	1.54773	1.66498	1.63943	2.03607	1.75282	1.77208	1.28608	1.54401	1.01603	-0.683182	0.62279	9.78326e-05	0.00138621	4.00952	-0.446959	0.733588	0.00395388	0.0256723	-1.01806	0.493779	8.93873e-07	1.35253e-05
ENSG00000008853	RHOBTB2	4.25017	3.9412	4.12388	4.66085	4.50321	4.51074	3.87321	3.81545	4.05047	4.38033	4.21624	4.35693	0.453557	1.36941	9.85404e-05	0.00139493	4.00639	-0.191676	0.875588	0.0571441	0.176844	0.212902	1.15902	0.0318724	0.071993
ENSG00000146587	RBAK	5.57379	5.37657	5.62748	5.0109	5.06604	5.07188	5.73619	5.8187	5.84398	5.06498	5.14655	5.23248	-0.476077	0.71893	9.87043e-05	0.00139595	4.00566	0.274046	1.20919	0.0076952	0.042301	-0.378037	0.769484	0.000844368	0.00361011
ENSG00000144635	DYNC1LI1	6.4036	6.42187	6.40944	6.13103	6.15788	6.05421	6.23175	6.32791	6.2569	6.02366	6.08453	6.04116	-0.297195	0.813833	9.89137e-05	0.00139749	4.00474	-0.139454	0.907862	0.0291787	0.110236	-0.361866	0.778158	1.07292e-05	0.000101034
ENSG00000117791	2019-03-02	3.05201	3.1318	3.11085	3.66789	3.76854	3.58075	2.96534	2.87593	2.81871	3.68552	3.63261	3.13095	0.574326	1.48898	9.90469e-05	0.00139749	4.00416	-0.211652	0.863548	0.0956118	0.251356	0.38662	1.30733	0.00368104	0.0122252
ENSG00000261335	RP11-318A15.2	0.919867	0.467763	0.612468	-0.110725	-0.305327	0.153313	0.186697	0.587381	0.250741	-0.316477	-0.0851154	-0.311115	-0.754357	0.592811	9.90897e-05	0.00139749	4.00397	-0.32507	0.79826	0.0429366	0.145174	-0.904201	0.534328	1.31143e-05	0.000119703
ENSG00000149476	DAK	5.36175	5.41224	5.30639	5.99928	5.8837	5.74383	5.46574	5.44177	5.39011	6.04757	6.05784	5.74598	0.515526	1.42952	9.92729e-05	0.00139818	4.00317	0.0722106	1.05133	0.499113	0.714681	0.590851	1.50614	2.05439e-05	0.000171512
ENSG00000162813	BPNT1	6.07888	6.15495	6.22872	5.65662	5.73333	5.88595	6.46393	6.40277	6.47306	6.09629	6.1318	6.2834	-0.395624	0.760161	9.95374e-05	0.00139818	4.00201	0.292538	1.22479	0.00129711	0.0109374	0.0160491	1.01119	0.837264	0.90936
ENSG00000173530	TNFRSF10D	6.75353	6.74782	6.75588	6.46683	6.46324	6.47225	7.86751	7.85405	7.73719	7.65288	7.60952	7.77682	-0.28497	0.820759	9.9595e-05	0.00139818	4.00176	1.06714	2.09527	2.9272e-13	4.72024e-10	0.927117	1.90147	3.06008e-12	1.22128e-09
ENSG00000159217	IGF2BP1	1.24025	1.22765	0.88264	0.631131	0.629437	0.241519	0.669404	0.547757	0.538195	0.042969	0.308531	0.159013	-0.616241	0.652369	9.96644e-05	0.00139818	4.00146	-0.531992	0.691599	0.000425574	0.00478362	-0.946955	0.518726	5.85029e-07	9.66067e-06
ENSG00000167861	HID1	4.35287	4.29469	4.10805	4.88202	4.66471	4.7978	4.73453	4.61629	4.80165	5.11763	4.94485	5.27336	0.529253	1.44318	9.96645e-05	0.00139818	4.00146	0.465255	1.38056	0.000377986	0.00434798	0.859063	1.81386	1.92333e-07	3.87761e-06
ENSG00000066855	MTFR1	6.16174	6.25088	6.27801	5.78064	5.91085	5.93717	6.13469	6.13634	6.07133	5.84266	5.84057	5.92049	-0.354038	0.782391	9.96918e-05	0.00139818	4.00134	-0.116052	0.922709	0.113534	0.282086	-0.362415	0.777861	7.61179e-05	0.000499078
ENSG00000133805	AMPD3	3.68367	3.58246	3.76887	4.13984	4.08128	4.16406	3.8097	3.79646	3.84812	4.11293	4.19934	4.20799	0.450345	1.36637	9.99343e-05	0.00140028	4.00029	0.14013	1.102	0.143335	0.332018	0.495188	1.4095	3.30897e-05	0.000252605
ENSG00000167123	CERCAM	4.39006	4.46925	4.2225	4.85905	4.80742	4.71011	4.39011	4.4542	4.26036	5.11057	5.05599	4.81233	0.43129	1.34844	0.000100921	0.0014128	3.99602	0.00704567	1.0049	0.937232	0.991308	0.632736	1.5505	8.49662e-07	1.30327e-05
ENSG00000011422	PLAUR	4.53444	4.64663	4.46761	4.13389	4.032	4.10941	4.60787	4.77809	4.70246	4.28615	4.15806	4.12894	-0.458112	0.727939	0.000101168	0.00141496	3.99496	0.146317	1.10674	0.112518	0.28062	-0.358411	0.780023	0.000966616	0.00404272
ENSG00000127955	GNAI1	6.42037	6.37678	6.43773	6.07171	6.14136	6.13262	6.72098	6.63832	6.76046	6.41432	6.46272	6.3846	-0.296367	0.814301	0.000101607	0.00141979	3.99308	0.295052	1.22693	8.10059e-05	0.00131158	0.00908128	1.00631	0.877572	0.939212
ENSG00000124802	EEF1E1	6.10587	6.22644	6.25331	5.70198	5.78256	5.93684	5.85186	5.75715	5.75326	5.67538	5.60597	5.61172	-0.388201	0.764082	0.000102108	0.00142547	3.99094	-0.407748	0.753799	6.09105e-05	0.00103065	-0.563998	0.676425	1.28803e-06	1.84051e-05
ENSG00000179918	SEPHS2	6.44402	6.61735	6.40161	6.10888	6.19095	6.05514	6.34612	6.28137	6.11808	6.0757	6.02292	6.02081	-0.369504	0.774049	0.000102361	0.00142724	3.98987	-0.239472	0.847055	0.00444697	0.0280522	-0.447994	0.733062	1.18339e-05	0.0001098
ENSG00000061794	MRPS35	6.87005	6.97162	6.94559	6.57761	6.56751	6.63426	6.78334	6.74178	6.67993	6.55919	6.55771	6.52651	-0.336015	0.792227	0.000102442	0.00142724	3.98952	-0.194114	0.87411	0.00953249	0.0493081	-0.381218	0.767789	2.53926e-05	0.000203907
ENSG00000188021	UBQLN2	5.99601	5.93028	5.85463	5.66128	5.61556	5.56502	5.93863	5.98879	6.02275	5.64801	5.70342	5.61594	-0.313068	0.804928	0.000102518	0.00142724	3.9892	0.0563236	1.03981	0.370927	0.600045	-0.271201	0.828629	0.000411475	0.00200462
ENSG00000100505	TRIM9	2.28386	1.9347	2.40108	1.53572	1.44639	1.62582	1.96159	1.9008	2.22125	1.03355	0.723206	1.16792	-0.670018	0.628499	0.000102611	0.00142724	3.98881	-0.17792	0.883976	0.191987	0.40365	-1.23128	0.425938	5.59445e-08	1.50119e-06
ENSG00000161057	PSMC2	7.50677	7.64901	7.56529	7.25518	7.27167	7.30113	7.56129	7.44961	7.46771	7.2895	7.29266	7.2516	-0.297783	0.813502	0.000102722	0.00142747	3.98834	-0.0809038	0.945465	0.187195	0.396378	-0.295759	0.814644	0.000108248	0.000668782
ENSG00000110330	BIRC2	6.69507	6.76714	6.83949	6.17519	6.17029	6.42905	6.70669	6.80338	6.67412	6.18471	6.17496	6.58772	-0.509169	0.702627	0.000102872	0.00142825	3.9877	-0.0390729	0.97328	0.699083	0.856069	-0.452209	0.730923	0.000324335	0.00165095
ENSG00000182534	MXRA7	5.57864	5.65773	5.40052	5.97111	6.02801	6.08037	5.53063	5.40654	5.22795	6.20519	6.13313	5.87985	0.48041	1.39514	0.000103024	0.00142904	3.98706	-0.157787	0.896399	0.128209	0.306541	0.527399	1.44133	3.55727e-05	0.000268317
ENSG00000073756	PTGS2	1.43933	1.06269	1.52131	0.436431	0.534722	0.434598	1.45068	1.46026	1.71925	0.799118	0.894035	0.945834	-0.872234	0.5463	0.000103124	0.00142912	3.98664	0.202643	1.1508	0.248708	0.474517	-0.461294	0.726335	0.0157842	0.0403559
ENSG00000147862	NFIB	4.24688	3.93219	4.23868	4.76439	4.96286	4.87864	3.71035	3.68972	3.71339	4.1881	4.35128	4.29284	0.72979	1.6584	0.000103262	0.00142973	3.98606	-0.434272	0.740067	0.0131847	0.0627214	0.138446	1.10072	0.37021	0.506337
ENSG00000145632	PLK2	6.94984	7.00537	6.83446	6.67082	6.64635	6.57065	7.9862	8.02405	7.91242	7.70484	7.76557	7.69974	-0.30073	0.811842	0.000103378	0.00143003	3.98557	1.04411	2.0621	1.1072e-12	1.19902e-09	0.793335	1.73308	1.01809e-10	1.48416e-08
ENSG00000239264	TXNDC5	8.68585	8.669	8.67612	8.87315	8.88048	8.87641	8.64965	8.64658	8.65552	8.8483	8.88048	8.87641	0.199692	1.14845	0.000103889	0.00143579	3.98343	-0.0264004	0.981867	0.519	0.729922	0.191383	1.14186	0.000159593	0.000920171
ENSG00000130733	YIPF2	4.48046	4.5098	4.49597	5.07736	5.01299	4.78494	4.72532	4.65829	4.72801	5.13334	5.17713	5.2339	0.463344	1.37873	0.000104786	0.00144687	3.9797	0.208456	1.15545	0.0402629	0.138733	0.685786	1.60858	7.86919e-07	1.22615e-05
ENSG00000260238	RP11-54H19.8	0.947057	0.788242	0.743892	2.10435	1.79488	1.6445	1.20037	1.1138	0.2245	1.91331	1.89305	1.61544	1.02176	2.0304	0.000104926	0.00144749	3.97912	0.0195555	1.01365	0.926666	0.986513	0.981393	1.97437	0.00015891	0.000917102
ENSG00000158691	ZSCAN12	1.58319	1.5026	1.85144	1.15451	1.16932	1.08612	1.47532	1.4165	1.27942	1.04998	1.21388	1.15451	-0.508756	0.702828	0.000106085	0.00146214	3.97435	-0.255073	0.837945	0.021758	0.0894451	-0.506049	0.704148	0.000110771	0.000682959
ENSG00000146007	ZMAT2	6.62552	6.67429	6.69341	6.28315	6.37811	6.38939	6.74391	6.63611	6.76092	6.55771	6.47424	6.45591	-0.314225	0.804283	0.00010628	0.00146342	3.97355	0.0492948	1.03476	0.436235	0.66217	-0.168247	0.889924	0.0150472	0.038817
ENSG00000169155	ZBTB43	3.79102	3.48814	3.99771	4.44385	4.55563	4.56203	3.81524	4.11487	4.07563	4.50052	4.60448	4.88685	0.762345	1.69625	0.000106371	0.00146342	3.97318	0.244032	1.1843	0.139565	0.325489	0.904754	1.87223	1.37405e-05	0.000124074
ENSG00000004864	SLC25A13	4.87443	4.92338	4.75648	4.53031	4.46785	4.48763	4.62824	4.74759	4.49494	4.41006	4.41519	4.31172	-0.356431	0.781094	0.000107406	0.00147633	3.96897	-0.228249	0.853671	0.00489689	0.0299362	-0.472407	0.720761	4.37251e-06	4.82121e-05
ENSG00000074696	PTPLAD1	7.39711	7.45074	7.58303	7.65872	7.78632	7.81492	7.35805	7.32218	7.39333	7.71085	7.78632	7.74082	0.276433	1.2112	0.000107585	0.00147745	3.96825	-0.118935	0.920867	0.048765	0.157883	0.269179	1.20512	0.000140003	0.000824628
ENSG00000162409	PRKAA2	4.31199	4.01849	4.33239	4.67879	4.67174	4.81566	4.21993	4.43613	4.4039	4.45357	4.5098	4.72385	0.501431	1.41562	0.000108031	0.00148222	3.96645	0.132976	1.09655	0.212926	0.43127	0.341128	1.26675	0.00356361	0.011903
ENSG00000109062	SLC9A3R1	6.31423	6.40899	6.123	6.77225	6.78973	6.66182	6.65096	6.5107	6.66072	7.16593	7.08289	6.96142	0.458929	1.37452	0.000109092	0.00149543	3.96221	0.32504	1.2527	0.00263045	0.0190178	0.787994	1.72667	1.0779e-07	2.45377e-06
ENSG00000111142	METAP2	8.1234	8.20957	8.1493	7.87438	7.9462	7.9462	8.04638	7.99234	7.99825	7.85679	7.8192	7.82201	-0.238565	0.847588	0.000109475	0.00149803	3.96069	-0.148483	0.902199	0.00627	0.0362823	-0.328086	0.796592	2.68313e-06	3.28496e-05
ENSG00000087152	ATXN7L3	6.13313	6.11829	6.05983	5.90091	5.84764	5.79843	6.2293	6.26275	6.26187	6.10332	6.03615	6.12457	-0.254762	0.838125	0.000109542	0.00149803	3.96042	0.147486	1.10764	0.00908446	0.0475421	-0.0159083	0.989034	0.756153	0.851016
ENSG00000087301	TXNDC16	2.69412	2.61298	2.76823	1.98434	1.60659	1.89845	2.37705	2.54132	2.06142	1.36207	1.54401	1.23717	-0.86174	0.550288	0.000109578	0.00149803	3.96028	-0.365125	0.776401	0.0443642	0.148013	-1.31022	0.403259	8.50165e-07	1.30327e-05
ENSG00000124784	RIOK1	6.05537	6.08942	6.06963	5.75142	5.81308	5.78135	6.05028	5.90013	5.94966	5.75672	5.7396	5.70251	-0.289553	0.818155	0.000109952	0.00150178	3.9588	-0.104836	0.92991	0.0861412	0.234384	-0.338429	0.790902	1.94741e-05	0.000164208
ENSG00000182909	LENG9	1.22068	1.25082	1.02025	2.16738	2.06567	1.83489	1.23951	0.851841	1.43475	1.93414	2.50134	2.02343	0.858867	1.81361	0.000111018	0.00151499	3.95461	0.0113597	1.0079	0.949583	0.998656	0.989074	1.98491	2.11387e-05	0.000175223
ENSG00000145248	SLC10A4	2.84477	3.11245	2.92358	3.3971	3.63448	3.4857	2.80604	2.67794	2.86552	3.53499	3.48682	3.09689	0.545219	1.45924	0.000111229	0.00151649	3.95378	-0.177288	0.884364	0.140286	0.326509	0.413812	1.3322	0.00153988	0.00595716
ENSG00000143036	SLC44A3	3.06112	3.07016	2.95453	3.54745	3.53883	3.35849	2.92452	3.02975	2.92797	3.49996	3.39819	3.33744	0.453022	1.3689	0.000111529	0.00151922	3.95261	-0.0680864	0.953902	0.479116	0.700403	0.383489	1.30449	0.00057942	0.00263406
ENSG00000088451	TGDS	5.00715	5.25115	5.05686	4.58219	4.70858	4.76045	5.05062	5.05127	4.99924	4.89042	4.77707	4.94176	-0.421745	0.746521	0.000112519	0.00153133	3.94877	-0.0716159	0.951572	0.399518	0.629638	-0.235796	0.849216	0.0116077	0.0312917
ENSG00000179456	ZNF238	0.925818	0.888176	0.755717	0.13863	-0.100369	0.412798	0.627736	0.87	0.996713	0.511799	0.376468	0.470835	-0.706428	0.612836	0.000112656	0.00153182	3.94824	-0.0251032	0.98275	0.859941	0.95111	-0.403624	0.755957	0.0107501	0.0293357
ENSG00000178764	ZHX2	4.71511	4.7202	4.70487	5.11558	4.94965	5.08681	4.86527	4.83239	4.95828	5.15234	5.04966	5.2381	0.337237	1.26333	0.000112783	0.00153217	3.94776	0.171957	1.12659	0.022323	0.0911374	0.43295	1.34999	5.88057e-06	6.17847e-05
ENSG00000168887	C2orf68	3.67788	3.70412	3.62584	3.22336	3.33071	3.21821	3.79742	3.81383	3.77101	3.24153	3.56435	3.45164	-0.411961	0.751601	0.000112902	0.00153241	3.9473	0.124636	1.09023	0.136735	0.321302	-0.250662	0.84051	0.00686772	0.0203124
ENSG00000119927	GPAM	6.68503	6.5956	6.75257	6.14602	6.1861	6.19118	6.55546	6.58587	6.51583	5.96205	6.03941	6.09572	-0.503149	0.705565	0.000113129	0.00153276	3.94643	-0.125187	0.916885	0.225153	0.446447	-0.64541	0.639311	6.94497e-06	7.09084e-05
ENSG00000105726	ATP13A1	6.10873	6.01327	5.92428	6.5471	6.3135	6.35971	6.12563	5.91468	6.01411	6.5778	6.59178	6.41358	0.391302	1.31158	0.000113129	0.00153276	3.94642	0.0025199	1.00175	0.97525	1	0.512495	1.42652	4.65856e-06	5.08851e-05
ENSG00000131653	TRAF7	7.30056	7.23063	7.14314	7.69656	7.55732	7.47088	7.30113	7.20597	7.29185	7.67259	7.6196	7.51139	0.350151	1.27469	0.000113509	0.00153575	3.94497	0.0414228	1.02913	0.568255	0.766351	0.376537	1.29822	5.05886e-05	0.000359407
ENSG00000223380	SEC22B	5.84451	5.78295	5.75778	5.41706	5.58213	5.50448	5.87763	5.88471	5.85067	5.5722	5.65646	5.67538	-0.29396	0.81566	0.000113569	0.00153575	3.94474	0.0758547	1.05399	0.208899	0.42571	-0.160643	0.894626	0.0138428	0.0362243
ENSG00000120992	LYPLA1	7.55732	7.67833	7.67259	7.2849	7.32286	7.39781	7.57259	7.55528	7.36441	7.20298	7.26477	7.28579	-0.300939	0.811724	0.000113654	0.00153575	3.94441	-0.138704	0.908335	0.0340138	0.123222	-0.384992	0.765783	6.9502e-06	7.09098e-05
ENSG00000129451	KLK10	3.48663	3.51494	3.08801	4.2988	4.25875	3.9845	3.24631	3.29979	3.37042	4.2844	4.26914	3.77424	0.817039	1.76179	0.000113859	0.00153714	3.94363	-0.0584709	0.960281	0.740909	0.881981	0.746913	1.6782	0.000285952	0.00148623
ENSG00000137338	PGBD1	3.50748	3.63169	3.5345	2.95967	3.14523	3.22397	3.45648	3.3778	3.57776	2.8877	2.85288	2.80582	-0.448697	0.732704	0.000114175	0.00154005	3.94243	-0.0872567	0.941311	0.335732	0.56745	-0.709009	0.61174	5.41308e-07	9.06826e-06
ENSG00000198417	MT1F	0.872206	1.11495	0.810253	0.380272	-0.0300231	-0.115543	1.07493	0.723936	0.768646	0.190805	-0.00866465	0.217545	-0.854263	0.553148	0.000114533	0.00154349	3.94107	-0.0768529	0.948124	0.655798	0.828615	-0.799474	0.574558	0.000221066	0.0012043
ENSG00000256304	RP11-512M8.3	0.806896	0.343678	0.909158	-0.201285	-0.391235	-0.358379	0.471093	1.00885	0.587856	-0.173167	-0.158455	-0.205757	-1.00324	0.49888	0.000115381	0.00155355	3.93787	0.00297302	1.00206	0.988226	1	-0.865398	0.548895	0.000482805	0.00227586
ENSG00000179899	PHC1P1	2.25865	2.20047	1.93354	1.07493	1.36479	1.6902	2.53777	2.33963	2.69032	1.45448	1.45243	1.58886	-0.754964	0.592561	0.000115593	0.00155502	3.93707	0.39135	1.31162	0.0149579	0.0686787	-0.632923	0.644869	0.000618046	0.00277635
ENSG00000188818	ZDHHC11	2.2181	2.17089	2.63422	1.30986	1.16076	1.66776	2.63813	2.22359	2.43231	1.55451	1.36146	1.87228	-0.961033	0.513689	0.000115763	0.00155592	3.93643	0.0909569	1.06508	0.629235	0.810108	-0.744769	0.596764	0.00119944	0.0048325
ENSG00000197852	FAM212B	3.17204	3.40878	3.47719	2.76324	2.68784	2.72926	5.39835	5.4996	5.3879	4.78794	4.72413	5.15966	-0.625612	0.648145	0.000116665	0.00156537	3.93306	2.07619	4.21692	4.5971e-13	5.80805e-10	1.53699	2.90189	8.38083e-11	1.28345e-08
ENSG00000163820	FYCO1	6.07412	5.87069	5.91664	6.63989	6.49292	6.57761	6.29382	6.36634	6.50348	6.64748	6.5174	6.68439	0.616335	1.53298	0.000116672	0.00156537	3.93303	0.434153	1.35112	0.00292292	0.0205349	0.662446	1.58276	5.15597e-05	0.000364597
ENSG00000198513	ATL1	2.71988	3.02369	2.7652	2.09448	2.31708	2.44511	2.6008	2.76823	2.89347	2.46549	2.38406	2.49613	-0.55138	0.682367	0.000116832	0.00156548	3.93244	-0.0822682	0.944571	0.456982	0.681353	-0.388204	0.76408	0.00251422	0.00891026
ENSG00000067066	SP100	5.78276	5.91332	5.8207	5.46764	5.49656	5.54773	5.85628	5.77517	5.92086	5.68234	5.63506	5.79375	-0.335112	0.792723	0.000116887	0.00156548	3.93224	0.0117937	1.00821	0.861265	0.951651	-0.135586	0.9103	0.0581213	0.117079
ENSG00000112378	PERP	8.62869	8.61775	8.51783	8.33748	8.32034	8.33748	8.67612	8.73692	8.61775	8.52098	8.51235	8.54677	-0.256414	0.837166	0.000117055	0.00156634	3.93161	0.088731	1.06343	0.1011	0.261388	-0.0615246	0.958251	0.247257	0.371485
ENSG00000083520	DIS3	6.93094	6.83897	6.92843	6.52477	6.5494	6.57003	6.84749	7.01119	6.98461	6.45641	6.57162	6.5494	-0.351326	0.783863	0.000117246	0.00156666	3.9309	0.04845	1.03415	0.496319	0.712929	-0.37368	0.771811	5.9872e-05	0.000411883
ENSG00000238271	IFNWP19	1.17196	1.17859	0.930445	0.6851	0.418596	0.514753	1.63208	1.5738	1.44102	1.02246	0.852001	0.902162	-0.55431	0.680983	0.000117349	0.00156666	3.93052	0.455084	1.37086	0.000642328	0.00639675	-0.168213	0.889944	0.147398	0.247722
ENSG00000168026	TTC21A	1.40029	1.26956	1.2828	0.825772	0.721395	0.600336	1.26714	1.19756	1.30134	0.921273	0.723206	0.910198	-0.601645	0.659002	0.000117411	0.00156666	3.93029	-0.0622056	0.957799	0.610786	0.797393	-0.466049	0.723944	0.0012568	0.00503152
ENSG00000175220	ARHGAP1	5.82738	5.84614	5.4769	6.28137	6.21066	6.04205	5.89484	5.84211	5.83888	6.34913	6.26055	6.05802	0.46089	1.37639	0.000117492	0.00156666	3.92999	0.14125	1.10286	0.152526	0.34576	0.505813	1.41992	4.11385e-05	0.00030262
ENSG00000116750	UCHL5	6.36654	6.43382	6.44683	6.05368	6.15348	6.09705	5.95137	5.93396	5.92126	5.65924	5.78504	5.6013	-0.3143	0.804241	0.000118272	0.00157568	3.92712	-0.480175	0.71689	8.12477e-07	3.4601e-05	-0.733611	0.601397	2.10881e-09	1.31655e-07
ENSG00000164951	PDP1	10.2796	10.1515	10.3093	9.84448	9.91048	9.94304	10.1656	10.3854	10.2381	9.77303	9.85333	10.0186	-0.347418	0.78599	0.000118407	0.00157608	3.92662	0.0163549	1.0114	0.816699	0.925357	-0.365341	0.776285	6.86951e-05	0.000461652
ENSG00000175866	BAIAP2	5.63369	5.68079	5.57552	6.21186	6.03508	5.90532	5.71093	5.76145	5.85294	6.32115	6.34913	6.16105	0.420848	1.33871	0.00011851	0.00157608	3.92624	0.145031	1.10575	0.110088	0.276648	0.647331	1.56627	5.73521e-07	9.50291e-06
ENSG00000189280	GJB5	2.8783	2.68269	2.5252	3.41318	3.17578	3.27092	3.77449	3.71384	3.92489	4.44948	4.39935	4.19544	0.59095	1.50624	0.000119123	0.00158284	3.92401	1.10874	2.15657	2.67903e-08	2.49182e-06	1.65312	3.14513	3.49723e-11	6.88591e-09
ENSG00000256646	DKFZP686D09174	4.33135	4.47473	4.22538	3.58514	3.90677	3.76242	4.11632	4.03623	4.02457	3.81189	3.59101	4.03561	-0.592947	0.662987	0.000119355	0.00158453	3.92316	-0.285283	0.820581	0.026166	0.102085	-0.532396	0.691405	0.000324397	0.00165095
ENSG00000181789	COPG1	7.46811	7.42791	7.26932	7.67474	7.64369	7.63146	7.667	7.64655	7.67765	7.90927	7.86369	7.91242	0.26136	1.19861	0.000119528	0.00158466	3.92253	0.275112	1.21009	6.8984e-05	0.00114563	0.506476	1.42058	2.31077e-08	7.75081e-07
ENSG00000169288	MRPL1	6.0372	6.25959	6.02174	5.56021	5.75614	5.69785	5.93106	5.88682	5.72479	5.74258	5.71861	5.47597	-0.43511	0.739637	0.000119574	0.00158466	3.92236	-0.258968	0.835685	0.00854687	0.0454504	-0.460099	0.726936	6.51622e-05	0.000441629
ENSG00000115425	PECR	3.10769	3.16096	2.98217	2.68241	2.61137	2.60391	2.88779	2.95383	2.75586	2.22669	2.38886	2.39231	-0.451304	0.731381	0.000119842	0.00158684	3.92139	-0.218208	0.859633	0.0265319	0.10297	-0.748332	0.595291	3.02686e-07	5.63761e-06
ENSG00000108797	CNTNAP1	2.01368	1.91284	1.92404	1.37037	1.21838	1.18454	1.9738	1.7769	1.6922	1.35704	1.51141	1.20835	-0.692376	0.618834	0.000120037	0.00158802	3.92069	-0.136017	0.910028	0.337217	0.568933	-0.591037	0.663866	0.000545902	0.00251563
ENSG00000196715	VKORC1L1	6.4371	6.39049	6.5362	6.71162	6.71902	6.73369	6.15456	6.15025	6.08778	6.35685	6.37892	6.37184	0.26701	1.20331	0.000120657	0.00159484	3.91845	-0.323582	0.799083	1.91419e-05	0.000416371	-0.0852333	0.942632	0.137693	0.234822
ENSG00000138050	THUMPD2	4.9267	5.03648	5.14581	4.61048	4.71899	4.65176	4.79834	4.89996	4.91358	4.69737	4.59635	4.66085	-0.375683	0.77074	0.000121616	0.00160521	3.91501	-0.165381	0.891693	0.0414678	0.141598	-0.38453	0.766029	9.25399e-05	0.000587028
ENSG00000090924	PLEKHG2	3.59655	3.57943	3.56335	3.23739	3.14092	3.08641	3.29582	3.21246	2.97829	2.72623	2.63422	2.63731	-0.424747	0.744969	0.000121752	0.00160521	3.91452	-0.417846	0.748542	0.000143652	0.00206633	-0.913708	0.530819	9.1083e-09	3.91836e-07
ENSG00000154529	CNTNAP3B	3.34645	3.26519	3.39499	2.99811	2.89044	2.86966	3.25511	3.21527	2.96052	2.92171	3.00967	3.01345	-0.415786	0.749611	0.00012176	0.00160521	3.9145	-0.191886	0.87546	0.0333827	0.12137	-0.353918	0.782456	0.000548895	0.00252405
ENSG00000138041	SMEK2	7.16697	7.17732	7.32286	6.79625	6.84135	6.89769	7.1471	7.26831	7.31719	6.74486	6.92548	6.92006	-0.377198	0.769931	0.000122468	0.00161211	3.91198	0.0220439	1.0154	0.773049	0.900432	-0.359003	0.779703	0.000197292	0.00109646
ENSG00000125875	TBC1D20	6.13313	6.0752	6.0372	5.82002	5.79669	5.67848	6.09832	6.15186	6.17622	5.79822	5.66916	5.8709	-0.316722	0.802892	0.000122495	0.00161211	3.91188	0.0602526	1.04265	0.352804	0.584394	-0.302738	0.810712	0.000188655	0.00105581
ENSG00000133627	ACTR3B	4.24048	4.16475	4.15351	4.52314	4.50424	4.49739	4.03084	3.95338	3.95338	4.31473	4.31905	4.21442	0.321973	1.25004	0.000123613	0.0016254	3.90794	-0.207162	0.866239	0.00701782	0.0393481	0.096763	1.06937	0.16109	0.265842
ENSG00000041880	PARP3	3.5917	3.61569	3.34054	3.96978	3.95216	4.02119	3.72878	3.68035	3.81545	4.15574	4.00113	4.21509	0.464431	1.37977	0.000124155	0.00163112	3.90603	0.225057	1.16882	0.0309393	0.114997	0.607105	1.5232	5.00603e-06	5.38188e-05
ENSG00000136868	SLC31A1	6.03088	6.07412	5.944	6.31172	6.36615	6.34294	6.00768	5.94594	5.82719	6.18284	6.19047	6.34395	0.323756	1.25158	0.000124296	0.00163156	3.90554	-0.0896477	0.939752	0.197818	0.411533	0.222245	1.16655	0.00356033	0.0118958
ENSG00000134758	RNF138	7.01425	7.00814	7.03038	6.73803	6.70958	6.80953	6.66126	6.80269	6.68049	6.37091	6.41905	6.34945	-0.265248	0.832056	0.000124414	0.0016317	3.90513	-0.302747	0.810707	2.9934e-05	0.000599406	-0.637681	0.642745	1.37444e-09	9.82916e-08
ENSG00000101773	RBBP8	6.94253	6.92251	6.91649	6.67015	6.67684	6.66715	6.27938	6.28459	6.26847	6.01791	6.06963	6.02881	-0.255805	0.837519	0.000125045	0.00163856	3.90293	-0.649711	0.637408	6.25548e-10	1.26452e-07	-0.888398	0.540214	5.00603e-12	1.76503e-09
ENSG00000111875	ASF1A	5.73563	5.82642	5.78221	5.51616	5.47718	5.54928	5.71247	5.77586	5.69254	5.53371	5.44858	5.46678	-0.26729	0.830879	0.000126045	0.00165024	3.89947	-0.0545103	0.962921	0.324619	0.556863	-0.298319	0.813199	3.80209e-05	0.000283958
ENSG00000095794	CREM	3.60291	3.87349	3.88334	3.30276	3.31646	3.42879	3.77449	3.70804	3.81383	3.32707	3.32573	3.5636	-0.437259	0.738537	0.000126262	0.00165164	3.89873	-0.020938	0.985592	0.811247	0.922195	-0.381753	0.767505	0.000448338	0.00214695
ENSG00000001497	LAS1L	6.4	6.45321	6.2139	5.87276	5.89704	5.89662	6.1843	6.04506	6.01245	5.77266	5.71198	5.38857	-0.467217	0.723359	0.000126436	0.0016525	3.89813	-0.275482	0.826174	0.009351	0.0486413	-0.730734	0.602597	6.71681e-07	1.08104e-05
ENSG00000100504	PYGL	8.38115	8.43081	8.35825	8.17292	8.17292	8.14126	8.43528	8.36397	8.36194	8.27656	8.27481	8.19822	-0.227733	0.853976	0.000126813	0.00165599	3.89684	-0.00308033	0.997867	0.947373	0.997496	-0.140141	0.907431	0.00735033	0.0214925
ENSG00000067829	IDH3G	4.92707	5.00942	4.76309	5.53179	5.31399	5.44709	5.03481	4.94749	5.11917	5.76288	5.48054	5.4341	0.530683	1.44461	0.000128253	0.00167336	3.89193	0.133586	1.09702	0.242575	0.468017	0.659491	1.57952	1.01358e-05	9.65253e-05
ENSG00000115255	REEP6	4.32149	4.3279	4.32123	4.93292	4.77161	4.77437	4.13077	3.92569	4.01295	4.65097	4.77707	4.48122	0.502897	1.41706	0.000128704	0.00167651	3.89041	-0.30048	0.811982	0.0126753	0.0609677	0.313532	1.24275	0.0074034	0.0216121
ENSG00000158769	F11R	7.61567	7.56335	7.5846	7.31719	7.35805	7.33133	7.8192	7.8737	7.90489	7.58567	7.57057	7.71634	-0.252341	0.839533	0.000128715	0.00167651	3.89037	0.278093	1.21259	3.71409e-05	0.000705631	0.0361117	1.02535	0.48669	0.621469
ENSG00000182141	ZNF708	3.25584	3.24364	3.47013	4.01053	3.98889	4.05734	3.38761	3.657	3.45325	3.8105	3.80296	4.19914	0.696104	1.62012	0.000129047	0.00167938	3.88925	0.176565	1.13019	0.244796	0.470506	0.613458	1.52992	0.000457656	0.00218261
ENSG00000183317	EPHA10	2.22125	1.98434	1.62582	2.80863	2.5354	2.76251	2.0098	1.4165	1.91355	2.45569	2.42186	2.54947	0.757754	1.69086	0.000129725	0.00168676	3.88698	-0.16445	0.892268	0.323812	0.55588	0.530974	1.4449	0.0033368	0.0112822
ENSG00000132510	KDM6B	5.3939	5.28951	5.40635	4.95905	4.84496	4.92283	5.88274	5.92803	6.08353	5.48735	5.54415	5.62007	-0.454146	0.729942	0.000130027	0.00168924	3.88597	0.601766	1.51757	2.57891e-06	8.80606e-05	0.187137	1.1385	0.0506065	0.104829
ENSG00000137474	MYO7A	1.11902	1.12438	0.925415	2.06274	2.12025	1.51304	1.07493	1.24025	1.65255	2.00625	2.12876	2.14549	0.84279	1.79351	0.000131262	0.00170382	3.88186	0.266315	1.20273	0.146172	0.336351	1.03682	2.0517	1.13662e-05	0.00010585
ENSG00000198169	ZNF251	2.74649	2.82345	2.59574	3.28181	3.05149	3.39308	2.90819	2.8197	2.82345	3.26569	3.22926	3.45164	0.519606	1.43356	0.000131774	0.001709	3.88017	0.128113	1.09286	0.254502	0.480811	0.59259	1.50795	2.89583e-05	0.000226776
ENSG00000172167	MTBP	5.02749	5.01147	5.2505	4.60146	4.7071	4.82352	4.50938	4.61468	4.45437	4.13077	4.08332	4.05898	-0.385626	0.765447	0.000131931	0.00170958	3.87965	-0.569969	0.673631	1.54671e-06	5.73342e-05	-1.00484	0.498326	6.57897e-10	5.79906e-08
ENSG00000162458	FBLIM1	2.38153	2.24503	2.00511	2.85425	2.82848	2.59519	2.61805	2.66331	2.71233	3.12023	3.02069	3.12057	0.548628	1.46269	0.000132169	0.0017112	3.87887	0.453631	1.36948	0.000858745	0.00800703	0.87608	1.83538	3.45287e-07	6.29538e-06
ENSG00000142002	DPP9	6.82112	6.77856	6.67507	7.14378	6.97354	7.04154	6.85926	6.86403	6.87005	7.15354	7.1234	7.04453	0.294598	1.22654	0.000132311	0.00171158	3.8784	0.106054	1.07628	0.0979838	0.25595	0.348949	1.27363	1.95963e-05	0.000165055
ENSG00000033170	FUT8	5.7286	5.739	5.81113	6.03856	6.04526	6.04628	5.50312	5.43671	5.62881	5.71333	5.67622	5.73637	0.283891	1.21747	0.000132511	0.00171168	3.87775	-0.236519	0.848791	0.000950353	0.0087376	-0.0509074	0.965329	0.397965	0.53432
ENSG00000163659	TIPARP	7.04682	7.04901	6.9748	6.56644	6.5233	6.52016	7.27438	7.42342	7.34149	6.77623	6.84372	6.89183	-0.486974	0.71352	0.000132545	0.00171168	3.87764	0.32281	1.25076	0.00372448	0.024615	-0.186571	0.878691	0.0736942	0.142093
ENSG00000164751	PEX2	5.96437	6.10236	6.04782	5.60597	5.66295	5.71093	6.05514	6.00768	5.85226	5.66128	5.69617	5.789	-0.378351	0.769316	0.000132907	0.0017149	3.87645	-0.0666136	0.954877	0.393789	0.62384	-0.323007	0.799402	0.000589738	0.00267135
ENSG00000103035	PSMD7	6.854	6.93497	6.82086	7.20099	7.20772	7.20873	6.93745	6.81796	6.86579	7.23552	7.22549	7.14644	0.335744	1.26203	0.000135019	0.00173981	3.8696	0.00364424	1.00253	0.958834	1	0.332573	1.25926	0.000146447	0.000857251
ENSG00000143799	PARP1	9.10419	9.03347	9.07467	8.8161	8.85163	8.85964	8.94707	8.8899	8.98954	8.71658	8.71658	8.57733	-0.228321	0.853628	0.000135067	0.00173981	3.86945	-0.128573	0.914736	0.0132928	0.0629986	-0.400396	0.75765	1.37912e-07	2.94905e-06
ENSG00000065665	SEC61A2	3.0722	3.11556	3.09689	2.56805	2.58704	2.79866	2.88779	3.08488	3.13211	2.6963	2.60145	2.66618	-0.443931	0.735129	0.000135476	0.0017436	3.86814	-0.0598246	0.959381	0.50866	0.721471	-0.440247	0.737008	0.000142645	0.000838556
ENSG00000063601	MTMR1	5.56817	5.47127	5.46678	5.87203	6.02292	5.8596	5.39922	5.45192	5.5156	5.74126	5.74145	5.79601	0.416117	1.33433	0.000135763	0.00174581	3.86722	-0.0464765	0.968298	0.600309	0.79019	0.257326	1.19526	0.00788117	0.0227593
ENSG00000146731	CCT6A	9.59479	9.60127	9.6467	9.33783	9.42934	9.43569	9.49009	9.51212	9.48468	9.20335	9.26905	9.14392	-0.213301	0.862561	0.00013606	0.00174771	3.86627	-0.118587	0.92109	0.0143869	0.0665203	-0.408667	0.753319	3.97026e-08	1.16545e-06
ENSG00000181019	NQO1	7.95129	8.10051	7.89132	8.35825	8.25906	8.38652	8.06061	8.10634	8.00106	8.50062	8.50062	8.56467	0.353369	1.27754	0.000136141	0.00174771	3.86601	0.0747733	1.0532	0.319689	0.551697	0.540671	1.45465	7.85275e-07	1.22611e-05
ENSG00000140044	JDP2	2.82437	2.72768	2.54309	2.25791	2.21984	2.16546	2.53866	2.3834	2.40835	1.97096	2.06012	1.78621	-0.484273	0.714857	0.00013626	0.00174775	3.86563	-0.255365	0.837775	0.0181906	0.0785943	-0.759184	0.59083	7.34192e-07	1.16312e-05
ENSG00000166908	PIP4K2C	6.53904	6.51196	6.49049	6.24071	6.32704	6.22199	6.47884	6.57363	6.51394	6.26596	6.27985	6.33809	-0.250585	0.840556	0.000136559	0.00174883	3.86468	0.00827759	1.00575	0.872311	0.95737	-0.219386	0.858931	0.000485866	0.00228552
ENSG00000189164	ZNF527	2.31708	2.36004	2.49613	1.73985	1.98574	1.88533	2.33802	2.42953	2.49536	1.87347	2.00088	1.93865	-0.520584	0.69709	0.000136618	0.00174883	3.86449	0.030235	1.02118	0.773786	0.900621	-0.453228	0.730407	0.00050268	0.0023493
ENSG00000124596	OARD1	3.63493	3.65401	3.46209	4.03225	4.13104	3.92142	3.66175	3.58941	3.41167	4.14749	4.14536	3.94975	0.44436	1.36071	0.000136691	0.00174883	3.86426	-0.0299663	0.979443	0.753549	0.889426	0.497472	1.41174	3.76633e-05	0.000281565
ENSG00000168661	ZNF30	2.61206	2.82848	2.60145	2.10893	2.38593	2.02343	3.03938	2.96501	2.82925	2.48276	2.52997	2.49264	-0.508057	0.703169	0.000137011	0.00175146	3.86324	0.263424	1.20032	0.0167227	0.0741977	-0.179192	0.883198	0.0961353	0.176432
ENSG00000266680	RP5-1148A21.3	0.464546	0.0622601	0.189751	1.07375	1.07176	1.07817	0.886444	1.24487	1.18955	2.23002	2.49217	2.13979	0.835724	1.78475	0.000137591	0.00175739	3.86141	0.868181	1.82536	9.16555e-05	0.0014385	2.04894	4.13803	4.89562e-10	4.61009e-08
ENSG00000134748	PRPF38A	6.57065	6.50348	6.50042	6.24009	6.32331	6.28906	6.39336	6.41197	6.40899	6.21161	6.24349	6.21049	-0.240748	0.846306	0.000138486	0.00176732	3.8586	-0.120094	0.920128	0.0255367	0.100471	-0.302991	0.81057	1.06035e-05	9.99746e-05
ENSG00000138771	SHROOM3	5.40616	5.26629	5.38001	5.79336	5.82827	5.68989	5.51455	5.62073	5.68951	5.85866	5.80634	5.82889	0.419934	1.33787	0.000139327	0.00177656	3.85597	0.257665	1.19554	0.00856313	0.045471	0.480649	1.39537	3.04929e-05	0.000236351
ENSG00000141179	PCTP	5.07206	5.07672	4.91099	4.61685	4.69155	4.57928	5.17424	5.17967	5.08571	4.73818	4.93189	4.89815	-0.390928	0.762639	0.000139495	0.00177722	3.85544	0.126253	1.09146	0.122214	0.296661	-0.164479	0.89225	0.0520361	0.107045
ENSG00000164181	ELOVL7	4.47491	4.44168	4.88115	5.16531	5.07275	5.33314	4.5458	4.72748	4.84938	4.85009	5.04591	5.2661	0.591806	1.50713	0.000139845	0.00178018	3.85435	0.109382	1.07877	0.393518	0.62355	0.454626	1.37043	0.0016627	0.00633529
ENSG00000119326	CTNNAL1	7.54476	7.60952	7.56335	7.86492	7.92321	8.00814	7.22342	7.22342	7.14244	7.63146	7.65872	7.48133	0.359434	1.28292	0.000140506	0.00178708	3.85231	-0.376179	0.770475	0.000113446	0.00171652	0.0181846	1.01268	0.810071	0.888868
ENSG00000133606	MKRN1	6.09444	6.06686	6.13447	6.42217	6.4475	6.41432	6.45641	6.46253	6.57742	6.74656	6.66962	6.84874	0.329504	1.25658	0.0001408	0.00178932	3.8514	0.400335	1.31981	1.57805e-05	0.0003602	0.656207	1.57593	1.78358e-08	6.4078e-07
ENSG00000142273	CBLC	3.79102	3.72944	3.46804	3.04463	3.18299	2.9487	3.71836	3.58303	3.51624	3.01552	3.09689	3.09399	-0.604463	0.657716	0.000141791	0.00180008	3.84835	-0.0576686	0.960816	0.635754	0.814489	-0.594793	0.662139	0.000160368	0.000923412
ENSG00000132359	RAP1GAP2	6.56061	6.46431	6.62897	6.93119	6.88694	6.95456	6.52933	6.46431	6.75168	6.72268	6.76696	6.89246	0.373091	1.29512	0.000141884	0.00180008	3.84807	0.0307692	1.02156	0.69732	0.855345	0.242595	1.18312	0.00575496	0.0175449
ENSG00000122877	EGR2	0.405184	0.64928	0.460019	-0.273796	-0.288749	-0.316477	1.31194	1.02684	1.34039	0.867263	0.190315	0.846651	-0.7979	0.575186	0.000142568	0.00180726	3.84598	0.721506	1.6489	0.000292306	0.00358548	0.129673	1.09405	0.432333	0.569173
ENSG00000085832	EPS15	5.94058	5.89174	6.07314	6.31088	6.40179	6.39256	6.09111	6.22725	6.25431	6.28832	6.29985	6.44428	0.400117	1.31961	0.00014271	0.00180755	3.84554	0.222714	1.16693	0.0155465	0.0704844	0.375574	1.29736	0.000266799	0.00140125
ENSG00000145730	PAM	8.34781	8.2654	8.29137	8.07041	8.07539	8.12998	8.2435	8.21864	8.19724	8.00923	8.05914	8.03979	-0.209631	0.864758	0.000143174	0.00181191	3.84414	-0.0817388	0.944918	0.0739923	0.211097	-0.265494	0.831914	1.01717e-05	9.67461e-05
ENSG00000136235	GPNMB	2.17089	2.06972	2.05978	1.67931	1.55105	1.62582	1.91844	2.09168	2.21522	1.84414	1.6158	1.85315	-0.481446	0.716259	0.000143455	0.00181395	3.84328	-0.0249198	0.982875	0.800761	0.915975	-0.329298	0.795923	0.00377894	0.0124811
ENSG00000143486	EIF2D	5.54282	5.65721	5.46748	5.94884	5.89045	5.83855	5.80169	5.64416	5.72349	6.20612	6.17248	6.02669	0.336611	1.26279	0.000143838	0.00181727	3.84213	0.166998	1.12272	0.0284845	0.108397	0.579384	1.49421	1.55815e-07	3.2494e-06
ENSG00000126261	UBA2	7.61028	7.66059	7.72738	7.32709	7.40039	7.49535	7.4056	7.30916	7.3945	7.10159	7.06755	7.15029	-0.258501	0.835956	0.000144407	0.00182294	3.84041	-0.296249	0.814367	3.3559e-05	0.000652292	-0.559637	0.678473	7.73883e-09	3.39099e-07
ENSG00000139793	MBNL2	5.45178	5.32416	5.97927	6.23941	6.26425	6.59101	5.69726	5.8368	6.09232	6.14154	6.1403	6.58244	0.780461	1.71768	0.000145005	0.00182897	3.83862	0.291524	1.22393	0.0934764	0.247243	0.703013	1.6279	0.00041094	0.0020033
ENSG00000205336	GPR56	5.68869	5.5592	5.36832	6.09463	5.91867	5.85886	6.49197	6.38556	6.45984	6.76218	6.7704	6.86606	0.418475	1.33651	0.000145203	0.00182995	3.83802	0.906696	1.87475	4.94537e-09	6.9111e-07	1.26025	2.39538	2.29703e-11	4.97504e-09
ENSG00000008256	CYTH3	4.58628	4.42325	4.76045	5.02286	4.97084	5.00075	4.68997	4.67393	4.90491	4.95602	4.99684	5.11836	0.408778	1.32756	0.000145343	0.00183018	3.83761	0.167034	1.12275	0.067133	0.197747	0.433916	1.3509	7.41534e-05	0.000489865
ENSG00000171806	METTL18	3.23051	3.07581	3.2672	2.75529	2.71357	2.81142	2.92452	2.7908	2.81871	2.59639	2.56173	2.43862	-0.430855	0.741822	0.000145533	0.00183105	3.83704	-0.346244	0.786629	0.0010833	0.00955986	-0.658181	0.633677	1.11625e-06	1.62413e-05
ENSG00000137992	DBT	4.52084	4.4121	4.76045	4.99247	5.0595	5.22124	4.79834	4.86269	4.84477	5.15777	5.17713	5.40581	0.527014	1.44094	0.000146143	0.00183721	3.83522	0.271489	1.20705	0.0246917	0.0980748	0.682434	1.60484	6.95735e-06	7.0935e-05
ENSG00000179134	SAMD4B	6.54689	6.55602	6.58587	6.90067	6.84626	6.84903	6.66749	6.59072	6.83846	6.89711	6.90393	6.89458	0.302468	1.23325	0.000147249	0.00184958	3.83195	0.136087	1.09892	0.0446902	0.148637	0.335666	1.26196	4.66914e-05	0.000336769
ENSG00000101076	HNF4A	2.21653	1.86972	1.99694	3.05036	2.73218	2.48129	2.56513	2.49613	2.46797	2.96302	2.84539	2.82997	0.72755	1.65583	0.000147404	0.00184999	3.83149	0.482024	1.3967	0.00558212	0.0330892	0.852109	1.80514	2.35383e-05	0.00019145
ENSG00000147394	ZNF185	4.48612	4.52658	4.26366	4.93456	4.87759	4.7704	4.3629	4.3519	4.29844	4.94249	4.74539	4.61568	0.435063	1.35197	0.000147928	0.00185503	3.82995	-0.0882812	0.940643	0.354967	0.585917	0.342726	1.26815	0.00139018	0.00547158
ENSG00000158050	DUSP2	4.66617	4.56886	4.1554	3.90187	3.90822	3.67071	4.33563	4.42432	4.26929	3.92569	3.9813	3.53023	-0.637131	0.64299	0.000148174	0.00185506	3.82923	-0.121359	0.919321	0.351601	0.583126	-0.650583	0.637023	0.000116253	0.000710117
ENSG00000181513	ACBD4	0.143819	0.0467934	0.0296838	0.6745	0.649721	0.642657	0.64928	0.531497	0.376443	0.252229	0.783193	0.537255	0.582183	1.49711	0.000148174	0.00185506	3.82923	0.445569	1.36185	0.00176318	0.0140406	0.450638	1.36664	0.0015947	0.00613325
ENSG00000174021	GNG5	5.68869	5.73062	5.72216	6.37788	6.36207	6.19198	5.65131	5.65793	5.50036	6.43597	6.46823	6.09726	0.596987	1.51255	0.000148376	0.00185604	3.82864	-0.1107	0.926138	0.396228	0.626309	0.620758	1.53768	9.57162e-05	0.000601542
ENSG00000225968	ELFN1	1.31744	1.09293	1.16517	1.95068	1.69298	1.61103	1.00389	0.836902	0.923904	1.48233	1.60454	1.25568	0.559946	1.47421	0.000148806	0.00185989	3.82738	-0.27028	0.829158	0.0350268	0.125601	0.256026	1.19418	0.0419684	0.0900103
ENSG00000069248	NUP133	6.93287	6.93287	6.99463	6.69607	6.74145	6.71902	6.76805	6.74088	6.67015	6.42014	6.43908	6.40312	-0.234546	0.849953	0.000149323	0.00186413	3.82587	-0.227065	0.854372	0.000206835	0.00275314	-0.532554	0.69133	4.0762e-09	2.09489e-07
ENSG00000145882	PCYOX1L	3.76082	3.73929	3.57367	4.08288	4.07898	4.20546	3.49791	3.27629	3.32462	3.92254	3.94239	3.79235	0.430648	1.34784	0.000149391	0.00186413	3.82567	-0.325446	0.798052	0.00286221	0.0202492	0.194604	1.14441	0.0451507	0.0952568
ENSG00000165449	SLC16A9	4.01624	4.08288	3.99771	4.34808	4.45932	4.48502	3.59118	3.52189	3.29852	3.7669	3.75674	3.76543	0.398237	1.3179	0.000149796	0.00186764	3.8245	-0.562096	0.677317	6.40109e-06	0.000182763	-0.269404	0.829662	0.00591943	0.017974
ENSG00000100387	RBX1	4.74659	4.78847	4.93734	5.24309	5.36536	5.25303	4.86556	4.60261	4.52784	5.4678	5.37461	5.35592	0.463361	1.37875	0.000149979	0.00186839	3.82397	-0.158693	0.895836	0.128567	0.307106	0.575845	1.49055	1.21968e-05	0.000112823
ENSG00000178752	FAM132B	2.84539	2.82562	2.3678	1.95068	1.95146	1.51304	2.3267	2.36972	2.28242	1.65282	1.55893	0.75487	-0.87505	0.545235	0.000150163	0.00186914	3.82344	-0.35421	0.782298	0.0601033	0.183014	-1.35718	0.390343	9.8455e-07	1.46197e-05
ENSG00000148468	FAM171A1	5.93969	5.87506	5.82476	6.25006	6.19296	6.08128	5.84735	5.82642	5.90553	6.11881	5.99583	5.99347	0.294976	1.22686	0.000150507	0.00186977	3.82244	-0.0201309	0.986143	0.74874	0.886224	0.156308	1.11443	0.020476	0.0499174
ENSG00000132000	PODNL1	-0.305327	-0.125615	-0.440197	0.416462	0.674263	0.137446	-0.266856	-0.344597	-0.538908	0.220138	0.502222	0.513413	0.699785	1.62426	0.000150556	0.00186977	3.8223	-0.0932299	0.937422	0.533117	0.73996	0.701981	1.62674	0.000144371	0.000846736
ENSG00000074964	ARHGEF10L	3.74462	3.5061	3.51671	4.17416	3.96605	4.01024	3.55279	3.58303	3.59572	3.70069	3.78546	3.63473	0.461065	1.37656	0.000150583	0.00186977	3.82222	-0.0120311	0.991695	0.904075	0.974397	0.118026	1.08525	0.241018	0.364097
ENSG00000118200	CAMSAP2	5.94985	5.87303	6.15516	6.64748	6.65718	6.68471	6.04352	6.17826	6.39878	6.46527	6.50252	6.7656	0.67078	1.59193	0.000152166	0.00188641	3.81768	0.214698	1.16046	0.147419	0.33782	0.584865	1.4999	0.000582275	0.00264149
ENSG00000166794	PPIB	8.4944	8.60377	8.36031	8.87641	8.82966	8.81193	8.87641	8.80329	8.74773	9.191	9.10419	9.17784	0.353004	1.27722	0.000152172	0.00188641	3.81766	0.322754	1.25072	0.000372027	0.00429781	0.671304	1.59251	4.22452e-08	1.21533e-06
ENSG00000196459	TRAPPC2	3.26378	3.36024	3.33515	2.25518	2.87872	2.55337	3.48053	3.57244	3.18299	2.64479	2.29987	2.80247	-0.757459	0.591537	0.000153336	0.00189861	3.81435	0.0920356	1.06587	0.542899	0.74772	-0.738098	0.599529	0.000190634	0.00106453
ENSG00000117322	CR2	3.65007	3.41983	3.73608	4.08128	3.97359	4.18598	3.41007	3.3229	3.51624	3.87913	3.59813	3.95715	0.478645	1.39343	0.000153501	0.00189861	3.81389	-0.184964	0.879671	0.0920343	0.244366	0.209487	1.15628	0.0525289	0.107868
ENSG00000234072	AC074117.10	2.76882	2.70216	2.79454	2.24981	2.0903	2.00511	2.77153	2.74628	2.53241	1.83713	2.12281	2.16977	-0.639746	0.641826	0.000153532	0.00189861	3.8138	-0.0717751	0.951467	0.582577	0.777504	-0.712442	0.610286	4.94233e-05	0.00035328
ENSG00000171124	FUT3	0.358613	0.433037	0.181432	1.01059	1.23956	1.18611	0.405184	0.307858	0.508199	1.41242	0.708022	1.33338	0.820872	1.76647	0.000153677	0.00189885	3.81339	0.0826121	1.05893	0.638301	0.816303	0.826648	1.77356	0.000141212	0.000831423
ENSG00000183018	SPNS2	2.83148	2.73017	2.85288	3.64578	3.505	3.67071	3.11481	3.02455	3.58075	4.42169	4.16024	4.60963	0.802417	1.74402	0.000153957	0.00189994	3.8126	0.435718	1.35258	0.0201208	0.0844549	1.59165	3.01395	1.33036e-08	5.08051e-07
ENSG00000225383	SFTA1P	-0.238396	-0.427951	-0.19881	0.380272	0.458395	0.218491	-0.266856	-0.460497	-0.538908	0.31616	0.528942	-0.0703631	0.64092	1.55932	0.000154056	0.00189994	3.81232	-0.133654	0.91152	0.334063	0.565764	0.547119	1.46117	0.00070845	0.00312414
ENSG00000153066	TXNDC11	4.72686	4.77558	4.6249	5.16497	5.07568	4.92616	5.00092	4.93173	4.85679	5.14304	5.2044	5.13118	0.346471	1.27145	0.00015414	0.00189994	3.81208	0.220335	1.165	0.00724091	0.040286	0.450231	1.36626	7.30883e-06	7.38728e-05
ENSG00000171385	KCND3	0.379983	-0.20235	0.304086	0.738586	1.06826	1.01585	0.405184	0.0883807	0.268614	0.282472	0.502222	-0.0987063	0.780444	1.71766	0.000154368	0.0019012	3.81144	0.093666	1.06708	0.575152	0.771708	0.0686896	1.04876	0.680267	0.793098
ENSG00000172183	ISG20	1.02523	1.06269	1.03252	0.380272	0.291233	0.241519	1.31194	1.18101	1.17002	0.372612	0.723206	0.558169	-0.735773	0.600496	0.000154601	0.00190252	3.81079	0.180801	1.13351	0.243273	0.469126	-0.488914	0.712561	0.00493332	0.0154757
ENSG00000177054	ZDHHC13	4.8596	4.95555	5.00636	4.49494	4.62132	4.65407	4.65971	4.6007	4.70806	4.41765	4.40277	4.60272	-0.350424	0.784353	0.000155216	0.00190854	3.80906	-0.284169	0.821215	0.00106764	0.00946024	-0.466608	0.723664	6.41339e-06	6.63257e-05
ENSG00000188488	SERPINA5	0.534067	0.478056	0.586336	1.0212	1.16932	0.911827	0.354581	0.261616	0.376443	0.723206	0.440741	0.597434	0.501416	1.4156	0.000156641	0.0019238	3.80509	-0.201877	0.869419	0.0726445	0.208355	0.054409	1.03843	0.610715	0.734549
ENSG00000076067	RBMS2	3.5946	3.4823	3.62504	3.92254	4.13405	4.01973	3.86083	3.77941	3.87872	3.96605	3.94807	4.20643	0.458316	1.37394	0.000156711	0.0019238	3.8049	0.272607	1.20799	0.0114514	0.0562404	0.472275	1.3873	0.000110134	0.00067986
ENSG00000184517	ZFP1	4.68347	4.61286	4.79216	4.21201	4.31073	4.33538	4.61969	4.51486	4.67927	4.21735	4.26914	4.17625	-0.409936	0.752657	0.000157443	0.00193122	3.80288	-0.0911799	0.938755	0.288668	0.517929	-0.47474	0.719597	3.27188e-05	0.000250657
ENSG00000139505	MTMR6	5.61774	5.5742	5.61505	5.20767	5.29343	5.24784	5.52396	5.59536	5.48879	5.22946	5.21945	5.41029	-0.352657	0.78314	0.000158666	0.00194465	3.79952	-0.0662731	0.955102	0.371095	0.600189	-0.316391	0.803076	0.000437915	0.00210769
ENSG00000177565	TBL1XR1	7.38413	7.29185	7.44701	7.58514	7.66642	7.70119	7.36441	7.42742	7.42555	7.37074	7.46193	7.52741	0.276663	1.21139	0.00016017	0.00196117	3.79542	0.0316215	1.02216	0.592765	0.785295	0.0789525	1.05625	0.189795	0.302478
ENSG00000137364	TPMT	5.24575	5.33771	5.28326	4.91836	4.97254	5.03431	5.31477	5.32543	5.25823	5.0323	5.11234	4.99806	-0.314016	0.8044	0.000160272	0.00196117	3.79514	0.0104805	1.00729	0.872	0.957327	-0.241233	0.846022	0.00167645	0.00637807
ENSG00000197587	DMBX1	1.45746	0.90794	1.40375	0.812817	0.432138	0.642657	0.693503	0.625075	0.72514	-0.173167	-0.158455	-0.33127	-0.626888	0.647572	0.000161617	0.00197603	3.79151	-0.574871	0.671346	0.000375636	0.00432752	-1.47696	0.359245	2.77693e-09	1.59817e-07
ENSG00000105856	HBP1	5.27835	5.26826	5.58589	4.6464	4.76979	5.00348	5.77237	5.83095	5.96232	5.1345	5.13912	5.5515	-0.570826	0.673231	0.000162106	0.00198041	3.7902	0.478331	1.39313	0.000515926	0.00547373	-0.103074	0.931047	0.383113	0.519115
ENSG00000117640	FAM54B	5.15643	5.20366	5.2661	4.82132	4.69954	4.94155	5.40877	5.33314	5.47567	5.12924	4.97749	5.22315	-0.387993	0.764192	0.000162387	0.00198224	3.78945	0.197302	1.14655	0.0215964	0.0890463	-0.0990399	0.933654	0.227507	0.348924
ENSG00000161960	EIF4A1	10.4651	10.5071	10.4501	10.1937	10.2381	10.2259	10.265	10.1937	10.2259	10.0798	10.0186	9.93351	-0.254907	0.838041	0.00016262	0.00198349	3.78883	-0.245951	0.84326	0.000232488	0.00299723	-0.463313	0.725319	1.08708e-07	2.45621e-06
ENSG00000164934	DCAF13	7.37601	7.53407	7.56911	7.10052	7.21496	7.283	7.30247	7.24644	7.29117	7.08716	7.10221	7.12683	-0.293607	0.81586	0.000163019	0.00198676	3.78776	-0.212962	0.862764	0.00276343	0.0196696	-0.387652	0.764373	7.28286e-06	7.36594e-05
ENSG00000176658	MYO1D	6.25648	6.12334	6.12636	6.52887	6.54796	6.4438	6.20519	6.12826	6.2293	6.74763	6.7541	6.56035	0.338192	1.26417	0.0001634	0.00198981	3.78675	0.0188387	1.01314	0.795218	0.91391	0.518992	1.43295	9.24022e-07	1.38979e-05
ENSG00000116254	CHD5	1.88533	1.59428	1.72565	1.12178	0.992802	1.26714	1.80164	1.67345	1.5006	1.13955	1.32779	0.92968	-0.607868	0.656166	0.000163927	0.00199431	3.78535	-0.076556	0.948319	0.548219	0.751428	-0.602384	0.658665	0.000177411	0.00100251
ENSG00000106789	CORO2A	3.27567	3.11245	3.09991	3.5641	3.69	3.63473	3.28547	3.23585	3.54467	3.62346	3.53424	3.67312	0.46678	1.38202	0.000164033	0.00199431	3.78507	0.19274	1.14293	0.0682785	0.199994	0.447241	1.36343	0.000247164	0.00131853
ENSG00000147606	SLC26A7	1.67632	1.41912	2.02968	2.36519	2.45569	2.5731	1.78855	1.98994	2.08223	2.24174	2.56173	2.90121	0.756577	1.68948	0.000164632	0.00199999	3.78349	0.24584	1.18578	0.147291	0.33768	0.858676	1.81337	3.88088e-05	0.000288705
ENSG00000116016	EPAS1	5.80567	5.73015	5.83444	6.22373	6.19004	6.22475	6.06726	6.09168	6.25959	6.48014	6.38993	6.58244	0.42287	1.34059	0.000164948	0.00200133	3.78265	0.349636	1.27424	0.00101514	0.00911222	0.693933	1.61769	3.59392e-07	6.4866e-06
ENSG00000081019	RSBN1	5.63072	5.54329	5.69136	5.09446	5.08588	5.16483	5.47582	5.5931	5.33047	4.95175	5.06998	5.08062	-0.506625	0.703867	0.000165007	0.00200133	3.7825	-0.155225	0.897992	0.152184	0.345191	-0.587758	0.665376	3.40934e-05	0.000259483
ENSG00000180537	RNF182	3.97359	4.01849	4.21261	3.56626	3.69621	3.70534	4.17316	4.16475	4.3531	3.70436	3.84506	3.90361	-0.412007	0.751577	0.000165262	0.00200283	3.78183	0.16267	1.11936	0.0652799	0.193869	-0.250663	0.84051	0.00870612	0.024644
ENSG00000135709	KIAA0513	4.45998	4.48634	4.55093	3.93695	3.93626	4.07353	4.63439	4.71548	4.81072	4.13389	4.27973	4.39154	-0.516887	0.698878	0.000165938	0.00200942	3.78005	0.221374	1.16584	0.0453593	0.150022	-0.231283	0.851877	0.0421463	0.0903153
ENSG00000213937	CLDN9	0.115155	0.150497	0.0924797	1.12178	1.49407	0.569201	0.22252	0.261616	0.00107555	1.06893	1.05163	0.910198	0.942574	1.92195	0.000166294	0.00201108	3.77912	0.0422914	1.02975	0.83524	0.936836	0.891019	1.85449	0.000291219	0.00150946
ENSG00000014216	CAPN1	7.98346	8.01367	7.76557	8.42364	8.27481	8.20957	8.32391	8.25438	8.31683	8.6153	8.53779	8.48474	0.381643	1.30283	0.000166341	0.00201108	3.779	0.377237	1.29885	0.000187429	0.00253925	0.624961	1.54217	3.99753e-07	7.10285e-06
ENSG00000091656	ZFHX4	4.68297	4.46773	5.00415	5.29265	5.36809	5.39611	4.89673	5.18085	5.33335	5.12237	5.13197	5.56502	0.634878	1.55281	0.000166732	0.0020142	3.77798	0.419907	1.33784	0.00602916	0.0351687	0.554592	1.46875	0.000621468	0.0027909
ENSG00000075975	MKRN2	5.2919	5.28113	5.34734	5.58008	5.6	5.60495	5.21337	5.31236	5.19198	5.48735	5.5184	5.37353	0.288304	1.2212	0.000166978	0.00201557	3.77734	-0.0674666	0.954312	0.286608	0.51533	0.153386	1.11218	0.0211809	0.0514291
ENSG00000177697	CD151	7.25227	7.35368	7.18428	7.76443	7.56794	7.6806	7.43627	7.33949	7.24384	7.86175	7.81492	7.82542	0.407438	1.32633	0.000167399	0.00201904	3.77625	0.076226	1.05426	0.38802	0.617209	0.570497	1.48504	3.25534e-06	3.80279e-05
ENSG00000141905	NFIC	6.28017	6.12875	6.02769	6.70489	6.64272	6.41815	5.93734	5.8613	6.02226	6.52887	6.5667	6.32728	0.443099	1.35952	0.000167663	0.00202062	3.77556	-0.205375	0.867313	0.0455297	0.150453	0.329016	1.25616	0.00246367	0.00875363
ENSG00000178988	MRFAP1L1	6.15254	6.24238	6.14727	5.90013	5.90206	5.87938	6.27095	6.20767	6.20307	6.09086	6.04065	6.08636	-0.286954	0.819631	0.000168361	0.00202594	3.77376	0.0463741	1.03267	0.443215	0.668748	-0.108226	0.927728	0.085735	0.16077
ENSG00000160408	ST6GALNAC6	4.89749	5.03209	4.90527	4.57367	4.35206	4.60503	4.77983	4.86065	4.80509	4.62596	4.52861	4.52187	-0.434994	0.739697	0.000168372	0.00202594	3.77373	-0.129931	0.913875	0.162759	0.360811	-0.386065	0.765214	0.000502464	0.00234902
ENSG00000167565	SERTAD3	4.71806	4.82132	4.54222	4.24432	4.29297	4.27542	5.00457	4.93113	4.81935	4.69897	4.57914	4.69091	-0.423495	0.745616	0.000168554	0.00202652	3.77326	0.223866	1.16786	0.0171146	0.075422	-0.0381138	0.973927	0.662948	0.779567
ENSG00000146433	TMEM181	5.92694	5.74448	5.99928	6.29985	6.33752	6.46178	5.81175	5.78565	5.78256	6.06542	6.11006	6.17153	0.476316	1.39119	0.000169934	0.00204132	3.76972	-0.0966254	0.935218	0.357585	0.58819	0.22553	1.16921	0.0383227	0.0834906
ENSG00000085662	AKR1B1	6.19004	6.26664	6.09774	5.78914	5.82476	5.72768	6.2499	6.07478	6.0488	6.03186	5.91229	5.81319	-0.404417	0.755541	0.000170369	0.00204132	3.76861	-0.0606011	0.958865	0.476703	0.697952	-0.265482	0.831921	0.0056099	0.0171981
ENSG00000147065	MSN	8.09792	8.00692	7.9881	8.35038	8.29867	8.22643	8.19124	8.17292	8.28775	8.41596	8.37063	8.32391	0.260874	1.1982	0.000170454	0.00204132	3.76839	0.186317	1.13785	0.00333515	0.0226339	0.339262	1.26511	8.64375e-06	8.46017e-05
ENSG00000125931	CITED1	2.14154	1.97001	1.58366	1.33457	1.06826	1.26714	1.52178	1.29621	1.26567	1.0011	0.808569	0.958308	-0.675604	0.62607	0.000170457	0.00204132	3.76839	-0.537766	0.688837	0.00136077	0.0113985	-0.976278	0.50829	2.61478e-06	3.21254e-05
ENSG00000167232	ZNF91	2.73898	2.51913	3.14347	3.99091	3.94398	4.067	2.85288	3.05857	3.13497	3.98276	3.74824	4.20341	1.20106	2.29908	0.000170537	0.00204132	3.76818	0.216196	1.16167	0.429139	0.656854	1.17772	2.26218	0.000204753	0.0011317
ENSG00000135631	RAB11FIP5	5.505	5.46919	5.39273	5.84709	5.75022	5.76568	5.5323	5.55595	5.71105	5.90633	5.88972	6.04849	0.331936	1.2587	0.000170593	0.00204132	3.76804	0.144077	1.10502	0.0553627	0.172813	0.492074	1.40647	1.54675e-06	2.10128e-05
ENSG00000198435	NRARP	3.64631	3.73929	4.06384	2.96664	2.98591	3.24549	3.29187	3.02455	3.41167	2.7503	2.83475	2.58998	-0.750099	0.594563	0.000172395	0.00206063	3.76348	-0.572947	0.672242	0.0017852	0.0141778	-1.09018	0.469702	2.97798e-06	3.55632e-05
ENSG00000242574	HLA-DMB	-0.175124	-0.451552	-0.440197	0.153561	0.0363436	0.396529	-0.217572	-0.344597	-0.209069	0.344463	0.528942	0.29854	0.550983	1.46508	0.000172478	0.00206063	3.76327	0.0985277	1.07068	0.408513	0.637746	0.746343	1.67754	5.26789e-06	5.6244e-05
ENSG00000158825	CDA	2.99573	2.79277	2.72813	3.61602	3.52879	3.54919	3.07414	2.82668	2.91811	3.88881	3.81015	3.51374	0.725632	1.65362	0.000172731	0.00206203	3.76263	0.100465	1.07212	0.533645	0.740083	0.899671	1.86564	1.38868e-05	0.0001248
ENSG00000157911	PEX10	3.74462	3.61569	3.63939	4.26098	4.27731	3.97589	3.47821	3.46353	3.44687	4.12287	4.25676	3.93954	0.505212	1.41933	0.000173023	0.00206389	3.7619	-0.203731	0.868302	0.0839133	0.229765	0.440556	1.35713	0.000649459	0.00290199
ENSG00000121848	RNF115	5.01167	5.22219	5.26271	4.79259	4.77161	4.8083	5.02956	5.0754	4.99734	4.70092	4.69762	4.70336	-0.374554	0.771344	0.000173781	0.0020713	3.76	-0.131281	0.91302	0.107632	0.272923	-0.464736	0.724604	1.6789e-05	0.000145411
ENSG00000152484	USP12	6.71466	6.61867	6.93745	6.2357	6.33643	6.44778	6.57363	6.76732	6.75168	6.20244	6.23915	6.34686	-0.416741	0.749115	0.000174785	0.00208163	3.7575	-0.0589325	0.959974	0.502646	0.716859	-0.494018	0.710045	2.8222e-05	0.000221811
ENSG00000256982	CTD-2555A7.2	0.883766	1.14352	0.830828	0.221501	0.260166	0.241519	1.03914	1.36873	1.5517	0.636705	0.470577	0.558169	-0.711811	0.610553	0.000175427	0.00208764	3.7559	0.367109	1.28977	0.022211	0.0907902	-0.397688	0.759074	0.0157019	0.0402055
ENSG00000076351	SLC46A1	4.87743	4.85095	4.67439	5.26891	5.25517	5.03762	4.98898	4.87381	4.99475	5.28814	5.32607	5.28326	0.386228	1.30697	0.000175922	0.00209188	3.75468	0.151249	1.11053	0.0830879	0.228206	0.497923	1.41218	9.4313e-06	9.09593e-05
ENSG00000176595	KBTBD11	3.67788	3.4844	3.7011	3.19002	3.28056	2.9916	3.38761	3.35496	3.66128	2.83386	2.80716	2.7886	-0.466415	0.723761	0.000176342	0.00209523	3.75364	-0.15262	0.899615	0.12948	0.308502	-0.810781	0.570073	2.83823e-07	5.34538e-06
ENSG00000120705	ETF1	8.79314	8.80329	8.82257	8.57399	8.63434	8.63434	8.61362	8.66141	8.67612	8.38948	8.43081	8.37613	-0.192118	0.87532	0.000176712	0.00209799	3.75273	-0.15591	0.897566	0.00121619	0.0104138	-0.407475	0.753942	1.3202e-08	5.06723e-07
ENSG00000170017	ALCAM	7.04796	7.02756	7.30319	7.65401	7.66758	7.78011	7.22974	7.2317	7.38686	7.6179	7.64157	7.93447	0.57457	1.48923	0.000177282	0.00210311	3.75134	0.156917	1.1149	0.216891	0.436633	0.604902	1.52088	0.000101514	0.000633927
ENSG00000167874	TMEM88	0.0373987	0.150497	0.279001	-0.683741	-0.675199	-0.358379	0.521415	0.261616	0.886155	-0.267996	0.115658	0.159013	-0.728066	0.603713	0.00017749	0.00210393	3.75083	0.400932	1.32036	0.0160777	0.0722663	-0.153587	0.899013	0.324993	0.458815
ENSG00000103316	CRYM	1.83296	1.84502	2.01672	0.436431	1.28569	1.28528	2.08386	1.78426	1.72808	1.19421	0.946446	1.0716	-0.89583	0.537438	0.000178497	0.00211421	3.74837	-0.0327529	0.977553	0.860642	0.951469	-0.827206	0.56362	0.000379799	0.00187745
ENSG00000196371	FUT4	3.43805	3.23881	3.19885	3.58556	3.80501	3.72708	3.24886	3.26378	3.13211	3.3895	3.45358	3.45164	0.413689	1.33209	0.000179045	0.00211717	3.74704	-0.0772464	0.947865	0.401873	0.63164	0.139343	1.1014	0.132742	0.227917
ENSG00000155016	CYP2U1	2.25123	2.36004	2.4715	2.68241	2.98918	2.9916	2.03607	2.24439	2.36437	2.55125	2.58967	2.58273	0.526755	1.44068	0.000179068	0.00211717	3.74698	-0.145566	0.904025	0.223195	0.444601	0.213805	1.15974	0.0743274	0.14295
ENSG00000169583	CLIC3	0.31672	0.297864	0.181432	1.40075	1.41724	0.867263	0.22252	-0.231549	0.157784	0.9633	1.67309	0.958308	0.963266	1.94972	0.000179166	0.00211717	3.74675	-0.21582	0.861057	0.312408	0.544792	0.933064	1.90933	0.000245304	0.00131024
ENSG00000105655	ISYNA1	5.69401	5.78547	5.65812	6.34706	6.23383	6.11317	5.96373	5.82256	5.65812	6.4428	6.59682	6.24221	0.518845	1.43281	0.00017966	0.00212135	3.74555	0.101976	1.07324	0.371657	0.600842	0.715111	1.64161	4.15301e-06	4.61274e-05
ENSG00000149262	INTS4	5.78504	5.79205	5.79508	5.41187	5.60495	5.35306	5.69641	5.76651	5.79076	5.55976	5.49855	5.35562	-0.333976	0.793347	0.000180128	0.0021242	3.74442	-0.039452	0.973024	0.576248	0.772457	-0.31894	0.801658	0.000275416	0.00143827
ENSG00000188037	CLCN1	0.337879	0.319122	0.255157	-0.201285	-0.288749	-0.156176	-0.266856	0.0198865	0.119056	-0.34347	-0.470668	-0.281754	-0.519515	0.697606	0.000180181	0.0021242	3.74429	-0.346668	0.786398	0.00543098	0.0323914	-0.669458	0.628743	1.09954e-05	0.000103093
ENSG00000149679	CABLES2	3.83544	3.76203	3.44144	4.27482	4.2071	4.13984	3.28547	3.3957	3.43513	3.99672	3.89713	3.54511	0.527069	1.441	0.000180489	0.00212618	3.74355	-0.30815	0.807677	0.0175951	0.0769513	0.134085	1.0974	0.253378	0.378318
ENSG00000181392	SYNE4	3.74637	3.60814	3.73035	4.11337	4.20215	4.32897	3.79558	3.75699	3.84812	4.4198	4.30566	4.16086	0.5198	1.43376	0.00018148	0.00213619	3.74117	0.105504	1.07587	0.361268	0.591714	0.601437	1.51723	3.48662e-05	0.000264039
ENSG00000205581	HMGN1	7.52634	7.70119	7.73719	7.88839	7.98148	8.04827	7.5846	7.48444	7.49351	8.02232	7.96282	7.89617	0.317797	1.24643	0.000181799	0.00213779	3.74041	-0.134008	0.911296	0.0648225	0.193079	0.305777	1.23608	0.00026391	0.00138929
ENSG00000161533	ACOX1	6.99891	7.02377	6.99804	6.76303	6.77654	6.74342	7.32286	7.30113	7.31939	7.03961	7.07529	7.17933	-0.245913	0.843282	0.000181898	0.00213779	3.74017	0.307527	1.23758	1.20638e-05	0.000299344	0.090897	1.06503	0.092341	0.170709
ENSG00000110756	HPS5	5.94566	5.98879	5.92863	5.59912	5.65971	5.62241	5.85886	5.96471	5.82432	5.48254	5.51578	5.58008	-0.327361	0.796993	0.000183203	0.00215146	3.73707	-0.0718252	0.951434	0.306614	0.538344	-0.428516	0.743025	9.41413e-06	9.09094e-05
ENSG00000054282	SDCCAG8	4.12539	4.22492	4.35716	4.61817	4.58754	4.6159	4.24853	4.36746	4.19738	4.65652	4.47509	4.55777	0.371697	1.29387	0.000184748	0.00216793	3.73342	0.0355747	1.02497	0.662703	0.832553	0.327783	1.25508	0.000614905	0.0027647
ENSG00000225648	SBDSP1	5.45045	5.57087	5.44332	4.96897	5.15405	5.12572	5.27616	5.37568	5.17651	5.0769	5.18506	4.94069	-0.405585	0.75493	0.000185339	0.00217318	3.73203	-0.212323	0.863147	0.0224133	0.0914447	-0.420344	0.747247	0.000125892	0.0007595
ENSG00000269378	ITGB1P1	3.80334	4.00944	3.80804	4.52505	4.65585	4.39154	3.66966	3.79539	4.16271	4.47024	4.52431	4.28459	0.65045	1.56966	0.0001862	0.0021816	3.73002	0.00233746	1.00162	0.987168	1	0.553117	1.46725	0.000881092	0.00375231
ENSG00000122507	BBS9	3.45923	3.25178	3.51328	3.04463	2.95489	2.81142	3.62099	3.57943	3.85599	3.43189	3.41968	3.52143	-0.470407	0.721761	0.0001874	0.00219395	3.72723	0.277988	1.2125	0.00904682	0.0473942	0.0496952	1.03505	0.609856	0.733637
ENSG00000133816	MICAL2	5.49108	5.23444	5.41062	5.93475	5.92303	5.80085	5.62461	5.6167	5.7541	5.73619	5.73655	5.72906	0.507807	1.42189	0.000187668	0.00219451	3.72661	0.286679	1.21983	0.016904	0.0747613	0.355429	1.27937	0.00420845	0.0136071
ENSG00000198157	HMGN5	4.23109	4.18468	4.50581	3.52069	3.75937	3.92773	4.24283	4.30998	4.35785	3.79558	3.64492	3.84279	-0.571087	0.673109	0.000187737	0.00219451	3.72645	-0.00291563	0.997981	0.98022	1	-0.54575	0.685035	0.000279098	0.00145509
ENSG00000153157	SYCP2L	2.0831	2.22786	2.15221	1.38195	1.72371	1.66049	2.24816	2.41962	2.20707	1.68224	1.27688	1.69112	-0.565848	0.675558	0.000188011	0.00219603	3.72582	0.137124	1.09971	0.252803	0.478855	-0.60454	0.657681	9.45247e-05	0.000596623
ENSG00000005238	FAM214B	3.5431	3.51957	3.60814	3.14191	2.85815	3.06779	4.03592	4.05015	3.91819	3.51682	3.31928	3.81768	-0.534152	0.690565	0.000188997	0.00220584	3.72355	0.444568	1.36091	0.000582983	0.00599634	-0.00670285	0.995365	0.951466	0.990779
ENSG00000120756	PLS1	6.88848	6.88312	7.01807	6.47869	6.55374	6.60921	6.88727	6.93745	6.97997	6.52954	6.54518	6.59072	-0.382608	0.76705	0.000189343	0.00220607	3.72275	0.00521249	1.00362	0.948531	0.998104	-0.374699	0.771266	0.000227586	0.00123142
ENSG00000151726	ACSL1	5.17827	5.22743	5.44602	5.65812	5.68279	5.8113	4.91667	4.95602	5.14734	5.35133	5.35417	5.54773	0.433746	1.35074	0.000189492	0.00220607	3.72241	-0.276693	0.825481	0.00981513	0.0503748	0.133716	1.09712	0.167763	0.274345
ENSG00000267350	RP1-178F10.3	4.85877	4.82192	4.92911	4.54831	4.5206	4.50954	4.92283	4.95525	5.05325	4.58818	4.61255	4.78387	-0.34355	0.788099	0.000189595	0.00220607	3.72217	0.107447	1.07732	0.146073	0.336296	-0.208822	0.865243	0.00968333	0.0269374
ENSG00000151612	ZNF827	5.66472	5.49548	5.61505	5.06655	5.03624	4.87294	5.45879	5.5043	5.7099	4.92543	4.94096	4.92616	-0.599491	0.659987	0.000189666	0.00220607	3.72201	-0.0338357	0.97682	0.7861	0.908428	-0.660768	0.632541	6.91326e-05	0.00046377
ENSG00000135525	MAP7	5.93538	5.97841	6.03856	6.28472	6.27985	6.27287	5.91208	5.95857	6.04806	6.11787	6.1861	6.20894	0.295141	1.227	0.000189745	0.00220607	3.72183	-0.0110468	0.992372	0.863446	0.952854	0.186798	1.13823	0.0082584	0.0236371
ENSG00000123612	ACVR1C	0.272424	-0.0493451	0.224994	0.993718	1.20317	1.25437	-0.0497477	0.0883807	-0.0573619	0.813162	0.754272	1.52752	1.00107	2.00148	0.000190109	0.00220659	3.721	-0.155499	0.897822	0.482409	0.702777	0.881592	1.84241	0.00064915	0.00290146
ENSG00000183508	FAM46C	2.49779	2.16546	2.06721	1.56055	1.25611	1.46546	2.36519	2.90062	2.82925	1.93933	2.06012	1.99596	-0.81641	0.567853	0.000190213	0.00220659	3.72076	0.454817	1.37061	0.0123709	0.0598452	-0.245379	0.843594	0.163972	0.269688
ENSG00000141337	ARSG	2.15692	2.38406	2.17944	2.93577	2.84539	2.74628	2.33069	2.04468	2.26685	2.5202	2.54947	2.25828	0.602295	1.51813	0.000190346	0.00220659	3.72046	-0.0263352	0.981911	0.844305	0.941837	0.203039	1.15112	0.136668	0.233389
ENSG00000250508	RP11-757G1.6	-0.495723	-0.20235	-0.300797	0.36186	0.485691	0.137446	-0.348587	-0.265385	-0.209069	-0.0519282	0.228081	-0.0987063	0.661372	1.58159	0.000190372	0.00220659	3.7204	0.0586162	1.04147	0.683461	0.846773	0.358861	1.28241	0.020472	0.0499158
ENSG00000108639	SYNGR2	6.97668	7.08745	6.77402	7.37426	7.35213	7.31344	7.06777	6.98365	6.95573	7.50505	7.36319	7.39811	0.400241	1.31973	0.000190609	0.00220766	3.71986	0.0559304	1.03953	0.523011	0.732844	0.475824	1.39071	2.83046e-05	0.000222345
ENSG00000157657	ZNF618	4.86598	4.72434	4.82446	5.33437	5.27306	5.15192	4.79224	4.85009	4.99371	5.03456	5.13462	5.07307	0.448506	1.36463	0.000191354	0.00221459	3.71816	0.0740136	1.05264	0.455851	0.680299	0.275921	1.21077	0.0101761	0.0280151
ENSG00000152377	SPOCK1	0.477244	0.420215	0.405491	1.33457	1.06826	1.05163	0.860849	0.547757	0.447967	1.03355	0.846251	0.669806	0.717252	1.64405	0.000192386	0.00222447	3.71583	0.184446	1.13638	0.246178	0.471712	0.415864	1.3341	0.014387	0.037388
ENSG00000088356	PDRG1	5.70482	5.87808	5.68609	5.32295	5.26475	5.26183	5.80739	5.70184	5.54398	5.57119	5.54117	5.35052	-0.473318	0.720306	0.000192531	0.00222447	3.7155	-0.0722678	0.951142	0.471497	0.693478	-0.268396	0.830242	0.0146335	0.0379246
ENSG00000224470	ATXN1L	6.22405	6.0582	6.1922	5.65996	5.61936	5.65812	6.23595	6.3652	6.3505	5.69254	5.65971	5.95194	-0.512222	0.701142	0.000192648	0.00222447	3.71524	0.159236	1.1167	0.148285	0.33919	-0.39058	0.762823	0.00204339	0.00750945
ENSG00000040531	CTNS	3.98204	3.84938	3.92823	4.3596	4.27542	4.21718	3.87189	3.8223	4.05215	4.31144	4.28846	4.25973	0.364449	1.28739	0.000193985	0.00223678	3.71223	-0.00419865	0.997094	0.958324	1	0.366913	1.28959	0.000175353	0.00099162
ENSG00000182158	CREB3L2	5.42763	5.14158	5.57058	6.04644	6.13278	6.13708	6.05377	6.38514	6.41197	6.39615	6.40589	6.90291	0.726037	1.65409	0.000194008	0.00223678	3.71218	0.904439	1.87182	1.61899e-05	0.00036526	1.18791	2.27823	4.23116e-07	7.42461e-06
ENSG00000164211	STARD4	6.09857	6.08387	6.26163	5.50721	5.50656	5.72942	6.52529	6.72984	6.48442	5.71596	5.85974	6.17718	-0.566945	0.675045	0.000194236	0.00223769	3.71167	0.432035	1.34914	0.0015335	0.0125604	-0.231101	0.851984	0.0665453	0.130582
ENSG00000141526	SLC16A3	7.81093	7.82871	7.68446	8.37613	8.31841	8.10051	7.7206	7.66296	7.62577	8.32609	8.34931	8.11638	0.490334	1.40477	0.000194832	0.00224286	3.71034	-0.105091	0.929746	0.334979	0.566556	0.489413	1.40387	0.000195781	0.00109006
ENSG00000197261	C6orf141	2.52674	2.37154	2.84368	1.38581	1.78737	1.94523	2.29406	2.28956	2.30213	1.20926	1.3432	1.8257	-0.874	0.545632	0.000195309	0.00224665	3.70928	-0.284607	0.820965	0.132195	0.313354	-1.12124	0.459698	1.35103e-05	0.00012236
ENSG00000054179	ENTPD2	1.86374	1.89305	1.82096	2.40108	2.418	2.25865	1.93933	2.00511	1.68155	2.39256	2.16738	2.12315	0.500086	1.4143	0.000195481	0.00224677	3.7089	0.0158859	1.01107	0.885498	0.965136	0.368939	1.2914	0.00294418	0.010154
ENSG00000187607	ZNF286A	6.16653	6.06375	6.28017	5.69785	5.70618	5.78429	6.32566	6.46486	6.50159	5.8741	5.82869	6.11787	-0.440529	0.736864	0.000195616	0.00224677	3.7086	0.260889	1.19822	0.010287	0.0520391	-0.230236	0.852496	0.0231214	0.0551811
ENSG00000166123	GPT2	5.57029	5.58989	5.44079	5.92007	5.84629	5.82017	5.60548	5.5554	5.46748	5.8899	5.7483	5.86004	0.328366	1.25559	0.00019586	0.00224787	3.70805	0.00883243	1.00614	0.902071	0.973333	0.29884	1.23015	0.000483062	0.00227586
ENSG00000106366	SERPINE1	4.69399	4.78161	4.48317	4.17015	4.03592	4.00084	5.90769	6.08636	5.92803	5.31946	5.21479	5.67398	-0.584317	0.666965	0.000197089	0.00226026	3.70534	1.32055	2.49762	1.08316e-09	1.96532e-07	0.748263	1.67977	4.52827e-06	4.96049e-05
ENSG00000150995	ITPR1	4.35843	4.24197	4.45512	3.61602	3.60308	3.46479	4.29671	4.29159	4.63585	3.45423	3.55831	3.87321	-0.789952	0.578363	0.000197427	0.00226243	3.70459	0.0568407	1.04019	0.723222	0.87098	-0.724193	0.605336	0.000422528	0.00204467
ENSG00000185621	LMLN	4.23427	4.09307	4.29097	3.37437	3.50645	3.68627	4.1261	4.18277	4.26321	3.57013	3.54949	3.67535	-0.683778	0.622533	0.000198204	0.00226894	3.70289	-0.0149761	0.989673	0.915133	0.979987	-0.607812	0.656191	0.000561963	0.00256779
ENSG00000113645	WWC1	6.70281	6.57242	6.63776	6.94323	6.90583	7.00362	6.43137	6.4102	6.68049	6.77856	6.6783	6.70633	0.313217	1.24248	0.000198295	0.00226894	3.70269	-0.130143	0.913741	0.0716713	0.206666	0.0835393	1.05961	0.229406	0.350925
ENSG00000070214	SLC44A1	6.42364	6.37201	6.44019	6.76196	6.78044	6.79047	6.14695	6.22076	6.12895	6.55707	6.59992	6.41176	0.365732	1.28854	0.000200362	0.00229087	3.69818	-0.246328	0.84304	0.00666975	0.0379865	0.111384	1.08026	0.173549	0.282012
ENSG00000134440	NARS	8.21983	8.21983	8.24515	7.93849	7.99709	7.97093	8.25295	8.31514	8.2435	7.99234	7.98148	8.05518	-0.259418	0.835425	0.000200718	0.00229274	3.69741	0.0422796	1.02974	0.449748	0.675045	-0.21868	0.859351	0.000964145	0.00403684
ENSG00000168610	STAT3	6.94471	6.88848	6.89126	6.60821	6.58408	6.60428	7.53197	7.59913	7.63038	7.23394	7.18189	7.4598	-0.309312	0.807026	0.000200828	0.00229274	3.69718	0.679026	1.60106	5.0599e-09	6.9111e-07	0.383291	1.30431	1.37881e-05	0.00012443
ENSG00000269636	AC010441.1	5.69682	5.67162	5.63055	5.11057	5.081	5.30595	5.64739	5.53769	5.5756	5.17552	5.208	5.33047	-0.500806	0.706712	0.00020259	0.00231112	3.69338	-0.0795405	0.946359	0.455518	0.680137	-0.428806	0.742877	0.000817168	0.00351165
ENSG00000161013	MGAT4B	6.64331	6.57742	6.44194	7.15135	6.98208	6.89422	6.57263	6.52403	6.4343	7.20597	7.10596	6.86606	0.454963	1.37075	0.000203823	0.00232342	3.69075	-0.0441688	0.969848	0.660875	0.831015	0.505507	1.41962	6.52348e-05	0.000441923
ENSG00000173156	RHOD	4.34516	4.47074	4.26527	4.91133	4.77386	4.67089	5.04486	4.97627	4.91557	5.59153	5.69946	5.594	0.424867	1.34245	0.00020416	0.00232553	3.69003	0.618067	1.53482	2.42466e-06	8.41195e-05	1.26764	2.40768	3.95124e-11	7.13152e-09
ENSG00000138002	IFT172	3.46451	3.24793	3.52819	2.94611	3.05149	2.91247	3.45648	3.33898	3.461	3.04086	3.24735	2.98425	-0.442964	0.735622	0.000205067	0.0023341	3.6881	0.00576882	1.00401	0.950504	0.99914	-0.321875	0.80003	0.00303353	0.0104029
ENSG00000030110	BAK1	6.17591	6.19598	6.02471	5.71247	5.59237	5.64442	6.73977	6.77807	6.55374	6.38718	6.28066	6.37892	-0.482641	0.715666	0.000205529	0.0023376	3.68713	0.558008	1.47223	2.61768e-05	0.000539222	0.216447	1.16187	0.0437438	0.0928981
ENSG00000138175	ARL3	4.87028	5.05398	5.08062	4.49572	4.57706	4.4806	5.07568	4.88323	4.8083	4.71188	4.58818	4.45707	-0.48365	0.715166	0.000205932	0.00234043	3.68628	-0.0792463	0.946552	0.440684	0.66692	-0.415079	0.749978	0.000805147	0.00346884
ENSG00000117155	SSX2IP	6.4148	6.37541	6.54198	6.1022	6.12612	6.16053	5.7804	5.86871	5.75975	5.48054	5.55841	5.45967	-0.314283	0.80425	0.000206786	0.0023466	3.68448	-0.640913	0.641307	3.44171e-08	2.96476e-06	-0.944209	0.519714	1.15625e-10	1.57927e-08
ENSG00000163026	C2orf44	5.59755	5.6136	5.64061	5.22795	5.25461	5.42215	5.505	5.52094	5.59017	5.28573	5.2781	5.20875	-0.315848	0.803379	0.000206821	0.0023466	3.68441	-0.0784609	0.947067	0.254346	0.480759	-0.359478	0.779447	5.28799e-05	0.000372024
ENSG00000198518	HIST1H4E	-0.389205	-0.0929354	-0.440197	0.436431	0.093622	0.459548	0.06889	-0.127728	0.119056	0.611785	0.228081	0.427892	0.637149	1.55525	0.000206939	0.0023466	3.68416	0.327411	1.25476	0.0282549	0.107631	0.729983	1.65862	4.79135e-05	0.00034443
ENSG00000135074	ADAM19	7.74623	7.5846	7.52308	7.34546	7.22405	7.16733	7.31252	7.21874	7.15295	6.88804	6.87437	6.67445	-0.372349	0.772524	0.000207593	0.00235225	3.68279	-0.390062	0.763097	0.000130263	0.00190998	-0.805351	0.572223	1.46672e-08	5.45021e-07
ENSG00000159399	HK2	6.11355	6.01475	6.18966	5.65924	5.71987	5.71348	6.02108	5.96944	6.21855	5.58589	5.5184	5.63957	-0.408284	0.753519	0.000208134	0.00235662	3.68166	-0.0359903	0.975362	0.679557	0.844489	-0.524669	0.695119	1.3802e-05	0.000124481
ENSG00000223496	EXOSC6	4.11848	4.10941	3.64303	3.36174	3.49311	3.23946	3.82899	3.81085	3.87742	3.55516	3.39197	3.25547	-0.592978	0.662973	0.000208787	0.00236225	3.6803	-0.118836	0.92093	0.345189	0.576431	-0.556242	0.680071	0.000367138	0.00182378
ENSG00000114999	TTL	6.60122	6.57451	6.58989	6.24349	6.34612	6.34415	6.46801	6.48417	6.55485	6.22644	6.22578	6.40738	-0.277341	0.82511	0.000209066	0.00236365	3.67972	-0.0861417	0.942039	0.160551	0.35801	-0.302391	0.810907	8.45253e-05	0.000545779
ENSG00000137699	TRIM29	0.0618953	0.150497	0.0924797	0.926068	0.741222	0.615242	0.3032	0.601702	0.681319	1.63892	1.73742	1.46917	0.659309	1.57933	0.000209848	0.00237072	3.67809	0.427166	1.34459	0.00767791	0.0422522	1.51382	2.85566	3.54182e-09	1.89076e-07
ENSG00000171160	MORN4	2.7133	2.63547	2.69215	2.03308	2.10087	2.06274	2.89405	3.10412	2.83457	2.50939	2.10499	2.49264	-0.614683	0.653073	0.000211298	0.00238532	3.67511	0.263952	1.20076	0.0492523	0.158929	-0.311505	0.805801	0.0269519	0.062585
ENSG00000078668	VDAC3	7.85172	7.96908	7.82871	7.49597	7.60381	7.54418	7.84312	7.69974	7.64308	7.55239	7.55774	7.50322	-0.335309	0.792615	0.000211625	0.00238643	3.67443	-0.154698	0.898321	0.0442658	0.147865	-0.345412	0.787083	0.000154691	0.000896167
ENSG00000116266	STXBP3	5.40616	5.50101	5.6205	4.87901	4.94485	5.12061	5.55635	5.55341	5.63628	4.96631	5.00241	5.39374	-0.527777	0.693623	0.000211711	0.00238643	3.67426	0.0730607	1.05195	0.511891	0.724328	-0.389386	0.763454	0.00276658	0.00964232
ENSG00000241506	PSMC1P1	2.96632	3.11659	3.00547	2.5394	2.31761	2.62603	2.94355	2.95046	2.90288	2.85466	2.54174	2.48953	-0.535431	0.689953	0.000212419	0.00239264	3.67281	-0.0973371	0.934757	0.394296	0.624261	-0.40012	0.757795	0.00251867	0.00892184
ENSG00000110328	GALNTL4	4.91613	4.89696	4.99196	5.38284	5.15192	5.31517	4.81476	4.57222	4.77778	5.02729	5.07957	4.9303	0.34847	1.27321	0.000212668	0.00239366	3.6723	-0.213261	0.862586	0.0131345	0.0625414	0.0778718	1.05546	0.316514	0.449145
ENSG00000149418	ST14	7.25612	7.21874	7.13459	7.6196	7.62669	7.44994	7.22182	7.13793	7.21648	7.56129	7.62151	7.49194	0.362274	1.28545	0.000212888	0.00239436	3.67185	-0.0111737	0.992285	0.888497	0.966528	0.355138	1.27911	0.000255826	0.00135558
ENSG00000134030	CTIF	3.84777	3.58246	3.77161	4.21718	4.12944	4.19889	3.96473	3.94088	4.28714	4.48399	4.3279	4.53604	0.448144	1.36428	0.00021336	0.00239788	3.67089	0.330803	1.25771	0.00320724	0.0219724	0.715313	1.64184	6.79176e-07	1.09058e-05
ENSG00000143217	PVRL4	1.47422	1.75374	1.65255	0.436431	0.764357	0.911827	4.28805	4.1862	4.49739	3.42056	3.03181	3.82372	-0.922824	0.527475	0.000213782	0.00240085	3.67003	2.69717	6.48529	9.54487e-12	5.56576e-09	1.79678	3.47444	1.03992e-08	4.2727e-07
ENSG00000100418	DESI1	5.88407	5.98636	5.82642	6.232	6.20438	6.20612	5.99447	5.95248	5.91349	6.27588	6.28832	6.2096	0.315044	1.24405	0.000214041	0.00240198	3.6695	0.0543051	1.03836	0.436882	0.662887	0.358946	1.28249	5.21173e-05	0.000367512
ENSG00000267575	CTC-459F4.3	3.48814	3.86023	3.69393	3.21732	3.19885	3.07886	3.62908	3.48135	3.64685	3.31194	3.2672	3.34501	-0.515738	0.699435	0.000214331	0.00240345	3.66892	-0.0951374	0.936183	0.38719	0.616544	-0.373024	0.772162	0.00319788	0.0108902
ENSG00000103187	COTL1	8.44916	8.50404	8.28775	8.88048	8.78167	8.85592	8.4185	8.32034	8.27847	8.91856	8.82257	8.67121	0.425516	1.34305	0.000214615	0.00240486	3.66834	-0.0747734	0.949491	0.429674	0.65708	0.390583	1.31092	0.00048784	0.00229338
ENSG00000174652	ZNF266	4.20621	4.11145	4.22868	3.58679	3.74783	3.88994	4.16208	4.09009	4.10709	3.72502	3.53766	3.89351	-0.440755	0.736749	0.000216224	0.0024211	3.6651	-0.0621942	0.957806	0.507829	0.720898	-0.463931	0.725008	0.000125918	0.0007595
ENSG00000132294	EFR3A	7.3786	7.24811	7.43101	7.73923	7.74623	7.84893	7.33742	7.43845	7.34908	7.43542	7.53197	7.69728	0.425647	1.34318	0.000216437	0.0024217	3.66467	0.0225725	1.01577	0.809984	0.921381	0.202091	1.15036	0.041529	0.0892136
ENSG00000111615	KRR1	7.81492	7.8927	8.03535	7.47431	7.47545	7.67259	7.69656	7.71536	7.64901	7.29063	7.29965	7.41905	-0.373512	0.771901	0.000216645	0.00242224	3.66425	-0.227203	0.854289	0.0109512	0.0542938	-0.577935	0.669922	1.45982e-06	2.02307e-05
ENSG00000173041	ZNF680	3.89453	3.7259	4.05215	4.41469	4.34833	4.59543	3.33222	3.77003	3.53116	3.96011	3.9217	4.22987	0.56229	1.47661	0.000217317	0.00242796	3.66291	-0.345693	0.78693	0.0151604	0.069231	0.146011	1.10651	0.252966	0.377929
ENSG00000197442	MAP3K5	4.6539	4.64406	4.72052	4.15557	4.19967	4.11668	3.91127	3.93119	4.39791	3.37115	3.44965	3.40209	-0.515304	0.699645	0.000217729	0.00242889	3.66208	-0.592197	0.663332	5.37666e-05	0.000929482	-1.26508	0.416077	4.17739e-09	2.11817e-07
ENSG00000115091	ACTR3	8.64965	8.63434	8.72009	8.4185	8.46285	8.49089	8.49886	8.54337	8.49622	8.31683	8.37251	8.34781	-0.210578	0.864191	0.000217768	0.00242889	3.66201	-0.155137	0.898047	0.00308233	0.0213873	-0.322259	0.799816	1.61978e-06	2.18289e-05
ENSG00000178445	GLDC	3.18587	2.94998	2.83351	2.5731	2.52138	2.49733	2.87935	2.91196	2.71233	2.46013	2.52111	2.39231	-0.459453	0.727262	0.000217881	0.00242889	3.66178	-0.155693	0.897701	0.125496	0.302103	-0.53203	0.691581	4.71897e-05	0.000339878
ENSG00000114098	ARMC8	5.8613	5.81308	5.79456	5.47997	5.56522	5.59346	5.82699	5.85988	5.80553	5.43775	5.40152	5.55086	-0.276896	0.825365	0.000219208	0.00244189	3.65914	0.00776769	1.0054	0.896091	0.969987	-0.359959	0.779187	1.25525e-05	0.000115349
ENSG00000162927	PUS10	1.71383	1.40811	1.4739	1.01621	0.803455	0.972899	1.44278	1.80295	1.65255	0.781086	0.754272	0.817914	-0.601108	0.659248	0.000220565	0.00245462	3.65646	0.100854	1.07241	0.437419	0.663398	-0.747578	0.595603	2.14066e-05	0.000176864
ENSG00000198933	TBKBP1	3.3834	3.2663	3.17833	2.84952	2.65938	2.93483	3.33942	3.10412	3.48856	2.84997	2.81376	2.89368	-0.461842	0.726059	0.000220675	0.00245462	3.65625	0.0345878	1.02426	0.72288	0.87098	-0.423943	0.745385	0.000476164	0.00225447
ENSG00000198910	L1CAM	3.61474	3.63903	3.74044	4.24048	4.08789	4.09585	3.77766	3.75153	3.87349	4.18598	4.02392	4.17112	0.477041	1.39189	0.000221537	0.0024624	3.65455	0.136457	1.0992	0.210087	0.427649	0.462392	1.37782	0.0002947	0.00152282
ENSG00000065802	ASB1	5.90223	5.77625	5.86724	5.56298	5.5779	5.61172	6.1405	6.28202	6.22664	5.93633	5.82827	5.89315	-0.26433	0.832586	0.00022217	0.00246764	3.65331	0.367932	1.2905	3.77525e-06	0.000118257	0.0374607	1.02631	0.511359	0.645361
ENSG00000069812	HES2	3.61474	3.55902	3.60814	3.14602	3.05581	2.96926	5.03671	4.99313	5.08297	4.55943	4.46237	4.45339	-0.536661	0.689365	0.000222557	0.002468	3.65256	1.44375	2.72027	6.6854e-11	2.31802e-08	0.8981	1.86361	1.28616e-07	2.79361e-06
ENSG00000186472	PCLO	3.50597	3.1563	3.41472	2.46175	2.59806	2.64326	3.48925	3.93119	3.85108	2.26029	2.61805	3.1781	-0.791119	0.577896	0.000222638	0.002468	3.6524	0.398752	1.31837	0.0210985	0.0876016	-0.675642	0.626054	0.000877956	0.00374001
ENSG00000137200	FTSJD2	5.35687	5.208	5.25761	4.91307	5.08917	4.94069	5.39538	5.39024	5.38454	5.04155	5.09028	4.98502	-0.293136	0.816126	0.000222726	0.002468	3.65223	0.115909	1.08366	0.0766659	0.215886	-0.234984	0.849695	0.00155789	0.00601301
ENSG00000011295	TTC19	5.98708	5.98682	5.95709	5.5742	5.68838	5.71596	5.97604	5.97693	5.85365	5.65524	5.76235	5.73728	-0.317629	0.802387	0.000222854	0.002468	3.65198	-0.0415582	0.971605	0.545512	0.749795	-0.258867	0.835744	0.00137528	0.00542279
ENSG00000100462	PRMT5	8.13743	8.25295	8.06061	7.84037	7.8717	7.9116	8.16883	8.04827	8.12205	7.85491	7.77426	7.79651	-0.275972	0.825894	0.000223378	0.002472	3.65096	-0.0374478	0.974377	0.533181	0.739973	-0.341872	0.789017	2.23278e-05	0.000182749
ENSG00000188191	PRKAR1B	4.37836	4.4326	4.17362	4.89763	4.77285	4.75164	4.156	4.07301	4.05712	4.77639	4.71923	4.51862	0.478809	1.39359	0.00022438	0.00248127	3.64902	-0.233392	0.850633	0.0449549	0.149302	0.343486	1.26882	0.00402849	0.013129
ENSG00000170855	TRIAP1	6.4227	6.59291	6.54287	6.02275	6.11688	6.17519	7.5054	7.4598	7.29063	7.28162	7.34699	7.29935	-0.41468	0.750186	0.000225505	0.00249189	3.64684	0.899029	1.86481	5.7654e-09	7.66748e-07	0.789819	1.72886	4.00545e-08	1.16782e-06
ENSG00000185305	ARL15	4.33742	4.44168	4.47823	3.96361	4.11465	4.06084	4.50073	4.4884	4.67071	4.22492	4.31172	4.4013	-0.372697	0.772338	0.00022652	0.00250129	3.64489	0.134417	1.09765	0.100745	0.260759	-0.106849	0.928614	0.190997	0.303851
ENSG00000117472	TSPAN1	2.74649	2.96063	2.87173	3.55013	3.39508	3.36568	3.21443	2.96009	3.02327	3.81302	3.66821	3.63976	0.57747	1.49223	0.000227101	0.00250484	3.64378	0.206135	1.15359	0.123649	0.298619	0.847756	1.7997	2.22099e-06	2.8225e-05
ENSG00000170634	ACYP2	2.23527	2.17629	2.10008	2.54504	2.90783	2.6266	2.20499	2.3267	2.30213	2.90919	3.0725	3.03013	0.522488	1.43643	0.000227172	0.00250484	3.64365	0.107298	1.07721	0.364525	0.594823	0.833008	1.7814	7.39109e-07	1.16969e-05
ENSG00000138593	SECISBP2L	6.08037	5.93717	6.22747	5.27026	5.27848	5.36317	6.10983	6.29597	6.40433	5.45646	5.44747	5.91013	-0.777448	0.583398	0.000227578	0.00250749	3.64287	0.18885	1.13985	0.253088	0.479094	-0.477737	0.718103	0.00972663	0.0270183
ENSG00000089057	SLC23A2	4.75387	4.43341	4.64806	5.03762	5.18225	4.98324	4.74918	4.76505	4.96549	4.96224	4.98543	5.0637	0.456311	1.37203	0.000227755	0.00250762	3.64253	0.215216	1.16088	0.0453311	0.149999	0.392007	1.31222	0.000943174	0.00396766
ENSG00000169062	UPF3A	4.40446	4.39736	4.21333	3.80699	3.96907	4.008	4.56977	4.43472	4.45221	4.08049	3.98669	4.13691	-0.410971	0.752117	0.000228387	0.00251137	3.64133	0.146725	1.10705	0.103031	0.264845	-0.271021	0.828733	0.00641846	0.0192313
ENSG00000173566	NUDT18	1.92236	1.72726	1.2268	2.42213	2.58362	2.39205	2.08879	1.87347	1.82471	2.68984	2.38886	2.35048	0.840065	1.79013	0.000228427	0.00251137	3.64125	0.302921	1.23364	0.121624	0.295692	0.851189	1.80399	0.000194035	0.00108153
ENSG00000215251	FASTKD5	5.68793	5.70432	5.65244	5.40635	5.45435	5.40339	5.669	5.76463	5.67253	5.57087	5.59604	5.50492	-0.260258	0.834939	0.000229526	0.00252163	3.63917	0.0204149	1.01425	0.716591	0.867586	-0.12418	0.917525	0.0390223	0.0847467
ENSG00000170421	KRT8	10.9103	10.9103	10.8402	11.4063	11.4063	11.2791	10.8624	10.8402	10.8746	11.4625	11.5171	11.2483	0.476948	1.3918	0.000230939	0.00253531	3.6365	-0.0279445	0.980817	0.791865	0.912027	0.522618	1.43656	8.79319e-05	0.000563932
ENSG00000170949	ZNF160	4.31563	4.10528	4.24341	4.65425	4.76178	4.76335	4.44355	4.5904	4.76322	4.68762	4.75059	4.94885	0.505097	1.41922	0.000231111	0.00253536	3.63618	0.378005	1.29954	0.00307694	0.0213597	0.573661	1.48829	5.68634e-05	0.000394737
ENSG00000163013	FBXO41	4.94433	4.86577	4.92145	4.53238	4.49293	4.49622	5.08842	5.01181	5.27168	4.55676	4.58818	4.87691	-0.40323	0.756164	0.000231953	0.00254105	3.6346	0.213649	1.15962	0.0204572	0.085473	-0.2375	0.848214	0.0130351	0.0344535
ENSG00000105229	PIAS4	5.0374	5.06251	4.88482	4.65079	4.6195	4.4887	5.11234	5.06797	5.16102	4.87882	4.92687	4.68797	-0.408691	0.753307	0.000231965	0.00254105	3.63458	0.11858	1.08567	0.182203	0.389837	-0.163368	0.892938	0.075953	0.145376
ENSG00000136147	PHF11	2.81293	2.89441	2.79984	2.20763	2.48541	2.32416	2.61001	2.59031	2.36437	2.36157	2.28799	2.27981	-0.496855	0.70865	0.000232645	0.00254667	3.63331	-0.314459	0.804152	0.0086235	0.0456976	-0.525905	0.694524	0.000129195	0.000774202
ENSG00000070756	PABPC1	11.4625	11.3004	11.5171	11.6413	11.7723	11.6413	11.7041	11.7041	11.7723	11.7041	11.7041	11.7041	0.258439	1.19618	0.000233529	0.00255449	3.63166	0.300281	1.23138	4.77427e-05	0.000853559	0.277533	1.21212	0.000110928	0.00068337
ENSG00000166845	C18orf54	4.78415	4.79519	5.03209	4.27799	4.47003	4.44255	4.3186	4.56333	4.30319	3.78919	3.79857	3.57974	-0.473311	0.72031	0.000233761	0.00255519	3.63123	-0.47501	0.719462	0.000226122	0.00293649	-1.1468	0.451627	5.16103e-09	2.47615e-07
ENSG00000185104	FAF1	6.33136	6.46064	6.3534	6.06737	6.15456	6.04421	6.17549	6.13727	6.16653	5.93566	5.86333	5.96253	-0.293149	0.816119	0.000235057	0.0025661	3.62883	-0.222141	0.857292	0.00260887	0.0189124	-0.461507	0.726227	1.2965e-06	1.84566e-05
ENSG00000243749	ZMYM6NB	3.69393	3.88801	3.76203	3.3392	3.31832	3.29582	3.54633	3.60619	3.25584	3.53298	3.5672	3.38569	-0.463657	0.725146	0.000235098	0.0025661	3.62875	-0.312254	0.805382	0.0057932	0.034041	-0.28567	0.820361	0.00995366	0.027563
ENSG00000175792	RUVBL1	7.54958	7.61028	7.55412	7.24532	7.2849	7.30547	7.51062	7.38545	7.45726	7.26662	7.25859	7.1471	-0.292845	0.816291	0.000235422	0.0025678	3.62815	-0.120274	0.920013	0.0727217	0.208458	-0.34705	0.78619	3.91822e-05	0.000290627
ENSG00000139112	GABARAPL1	5.37079	5.43475	5.69785	4.8262	4.89673	5.07568	6.08453	6.16031	6.38439	5.59813	5.57103	6.02136	-0.56809	0.674509	0.000236106	0.00257173	3.62689	0.709202	1.6349	1.00104e-05	0.000258547	0.228486	1.1716	0.0678387	0.132796
ENSG00000164162	ANAPC10	4.12351	4.44583	4.1666	3.80564	3.76562	3.81135	4.13226	4.09057	4.08404	3.83585	3.58924	3.67189	-0.451554	0.731255	0.000236122	0.00257173	3.62686	-0.143474	0.905337	0.151218	0.343875	-0.546418	0.684718	3.21928e-05	0.000247252
ENSG00000167840	ZNF232	3.68035	3.90822	3.7011	3.34354	3.243	3.37904	3.61008	3.41074	3.59008	3.00692	2.95723	3.07652	-0.441765	0.736233	0.000236625	0.00257397	3.62594	-0.226563	0.854669	0.0275702	0.105839	-0.750252	0.5945	5.66204e-07	9.42285e-06
ENSG00000105063	PPP6R1	6.70937	6.69099	6.65964	7.15717	7.06605	6.91498	6.83701	6.76241	6.88513	7.13152	7.21921	7.00591	0.359519	1.283	0.000236667	0.00257397	3.62586	0.141494	1.10305	0.0887811	0.23857	0.43245	1.34952	3.15815e-05	0.000243516
ENSG00000186130	ZBTB6	5.45827	5.40559	5.66661	4.95014	4.97254	5.17917	5.58717	5.72491	5.63588	5.16762	5.24659	5.40171	-0.476078	0.718929	0.000236843	0.00257403	3.62554	0.139579	1.10158	0.178578	0.384741	-0.238367	0.847704	0.0306766	0.0698017
ENSG00000106462	EZH2	6.04273	6.15439	6.00486	5.67231	5.69726	5.62679	5.39082	5.44763	5.26183	5.08361	4.94666	4.7882	-0.401995	0.756811	0.000237152	0.00257427	3.62497	-0.700812	0.615226	3.84962e-07	1.91358e-05	-1.12723	0.457794	5.03356e-10	4.71073e-08
ENSG00000100599	RIN3	4.49645	4.5082	4.26124	5.10046	4.94715	4.82743	4.60787	4.43356	4.55105	5.14158	5.23593	4.74904	0.536164	1.45011	0.000237205	0.00257427	3.62488	0.108334	1.07798	0.375451	0.603369	0.620925	1.53786	4.6985e-05	0.000338583
ENSG00000110092	CCND1	9.32625	9.191	9.18232	8.97209	8.96529	8.8483	9.27221	9.46916	9.47912	9.09891	9.16111	9.16749	-0.304595	0.809669	0.000239937	0.00260098	3.6199	0.173656	1.12791	0.0161303	0.0723955	-0.0907912	0.939008	0.18328	0.294168
ENSG00000127946	HIP1	5.71683	5.51822	5.53323	5.05699	5.23169	5.08723	5.14581	5.16026	5.34494	4.70436	4.68025	4.68185	-0.464152	0.724897	0.000240009	0.00260098	3.61977	-0.372358	0.772519	0.00166121	0.0133824	-0.900607	0.535661	1.00709e-07	2.34539e-06
ENSG00000103342	GSPT1	8.11002	8.05777	8.11356	8.30173	8.33748	8.29337	7.8842	7.90215	8.0209	8.1234	8.12891	8.05518	0.217128	1.16242	0.000240981	0.00260965	3.61802	-0.157945	0.896301	0.00402028	0.0260143	0.0088607	1.00616	0.853495	0.921112
ENSG00000176533	GNG7	2.85425	2.65277	2.61852	3.42037	3.28869	3.0722	2.60348	2.50254	2.20707	3.30477	3.24735	3.01169	0.552176	1.4663	0.000241357	0.00261185	3.61734	-0.271211	0.828624	0.0456429	0.150794	0.480183	1.39492	0.000897306	0.0038064
ENSG00000116106	EPHA4	2.69998	2.4447	2.60145	3.38029	3.2668	3.39795	2.93135	2.8197	3.22849	3.53499	3.37991	3.80334	0.766415	1.70104	0.000242878	0.00262644	3.61461	0.411528	1.33009	0.0267142	0.103505	0.989829	1.98595	1.23728e-05	0.000114241
ENSG00000123545	NDUFAF4	5.30639	5.5805	5.48447	4.99371	5.08204	5.13008	5.30222	5.33373	5.2339	5.10713	5.10607	5.0769	-0.388696	0.76382	0.000243596	0.00263233	3.61333	-0.167261	0.890532	0.060413	0.183699	-0.360385	0.778957	0.000480863	0.00227011
ENSG00000162852	CNST	4.95404	4.90449	4.84358	4.46355	4.41936	4.38033	4.93632	5.00667	5.18489	4.52171	4.57025	4.7252	-0.479665	0.717144	0.000244469	0.00263988	3.61178	0.141938	1.10339	0.173376	0.376628	-0.295737	0.814656	0.0101444	0.0279636
ENSG00000092621	PHGDH	7.04188	7.11921	6.75688	7.66491	7.54323	7.31435	7.2874	7.25439	6.96909	7.80447	7.79209	7.60675	0.534623	1.44856	0.000244661	0.00264008	3.61143	0.197084	1.14638	0.111197	0.278342	0.761656	1.69544	4.11433e-06	4.58657e-05
ENSG00000135213	POM121C	6.46178	6.31672	6.23033	6.82764	6.71756	6.57932	6.91028	6.89246	6.96142	7.12853	7.10756	7.11452	0.37192	1.29407	0.000245676	0.00264914	3.60964	0.584968	1.50001	1.15751e-06	4.52294e-05	0.780445	1.71766	1.80124e-08	6.45594e-07
ENSG00000215246	RP11-43F13.3	-0.149821	-0.550864	-0.364959	0.0645069	0.378466	0.241519	-0.465609	-0.302045	-0.25836	0.282472	0.470577	0.217545	0.583382	1.49836	0.000246116	0.002652	3.60886	0.0132761	1.00924	0.918474	0.98167	0.678891	1.60091	4.89175e-05	0.000350028
ENSG00000178381	ZFAND2A	4.48381	4.678	4.69345	3.98493	4.15176	4.29045	4.35666	4.48988	4.41189	4.04336	3.9899	4.01432	-0.476276	0.718831	0.000247055	0.00266023	3.60721	-0.198792	0.87128	0.0664666	0.196357	-0.602388	0.658663	2.09616e-05	0.000174313
ENSG00000110011	DNAJC4	2.89421	2.91247	2.6963	3.40072	3.42968	3.25275	2.98217	2.99496	2.88857	3.4449	3.52518	3.31449	0.526527	1.44046	0.000248278	0.0026715	3.60506	0.120436	1.08706	0.319142	0.551114	0.593968	1.50939	6.60594e-05	0.000446512
ENSG00000172986	GXYLT2	2.01672	1.94847	2.06721	2.43055	2.6774	2.55076	1.66181	1.8153	2.01322	2.24174	2.33843	2.19372	0.542184	1.45617	0.000248739	0.00267456	3.60426	-0.180407	0.882454	0.158277	0.354661	0.247517	1.18716	0.0536324	0.109777
ENSG00000069869	NEDD4	3.23462	3.17604	3.35598	3.99771	4.05047	4.10832	2.86808	3.24245	3.26781	3.26569	3.5843	3.67535	0.796822	1.73727	0.000249103	0.00267657	3.60362	-0.128853	0.914558	0.492895	0.710814	0.252157	1.19099	0.176114	0.28511
ENSG00000169398	PTK2	7.65817	7.61662	7.61132	7.91042	7.89473	7.9274	7.58852	7.66059	7.67342	7.81361	7.82779	7.92625	0.282121	1.21598	0.000249385	0.0026777	3.60313	0.0121496	1.00846	0.846614	0.943233	0.226993	1.17039	0.00175272	0.00661021
ENSG00000122042	UBL3	4.25161	4.23657	4.35716	4.68402	4.68041	4.75164	4.40524	4.40768	4.68102	4.65425	4.65158	4.83224	0.423735	1.3414	0.000250129	0.0026838	3.60184	0.216641	1.16202	0.0328803	0.120178	0.430591	1.34779	0.000206267	0.00113924
ENSG00000136982	DSCC1	6.58798	6.74211	6.74975	6.11994	6.27492	6.33781	5.86724	5.73655	5.6602	5.46511	5.49437	5.09149	-0.449155	0.732472	0.000251442	0.00269598	3.59956	-0.938652	0.52172	3.61204e-08	3.07652e-06	-1.3419	0.394501	2.16221e-10	2.44636e-08
ENSG00000243660	ZNF487P	1.59471	1.51653	1.63651	0.695901	1.11756	1.1472	1.43752	1.64527	1.48376	0.867263	0.846251	0.945834	-0.595763	0.661694	0.000251848	0.00269842	3.59886	-0.0603131	0.959056	0.643342	0.819734	-0.69614	0.617221	5.00058e-05	0.000356771
ENSG00000006576	PHTF2	6.17534	6.1405	6.25881	5.74359	5.75508	5.9065	5.79881	5.94172	5.78682	5.39291	5.40813	5.56138	-0.389828	0.763221	0.000252885	0.00270762	3.59708	-0.348965	0.785147	0.000703236	0.00684324	-0.737683	0.599702	1.33512e-07	2.87526e-06
ENSG00000149532	CPSF7	6.78334	6.77593	6.82867	6.52277	6.52199	6.5494	6.65906	6.63165	6.71958	6.43255	6.30537	6.52111	-0.264555	0.832455	0.000253809	0.0027156	3.59549	-0.125787	0.916504	0.0420862	0.143129	-0.376506	0.770301	5.04101e-06	5.40883e-05
ENSG00000226479	TMEM185B	4.46972	4.42971	4.3609	4.05239	4.1881	3.89223	4.55857	4.52784	4.57459	4.07001	4.08968	4.23742	-0.375759	0.7707	0.000254304	0.00271897	3.59465	0.133411	1.09688	0.109506	0.275747	-0.288448	0.818783	0.00238704	0.00852474
ENSG00000179364	PACS2	5.21523	5.1667	5.06956	5.65349	5.5357	5.47611	5.08631	5.00326	4.89493	5.52433	5.60313	5.29047	0.404553	1.32368	0.000255824	0.0027333	3.59206	-0.155979	0.897523	0.104272	0.267293	0.322594	1.25058	0.00194496	0.00722025
ENSG00000119969	HELLS	6.82223	6.79998	6.96481	6.41261	6.48476	6.52477	6.09111	6.18571	5.91059	5.64211	5.69803	5.36418	-0.388165	0.764101	0.000256328	0.00273675	3.5912	-0.799753	0.574447	4.2795e-08	3.56491e-06	-1.2933	0.408016	3.88245e-11	7.11907e-09
ENSG00000105738	SIPA1L3	5.83444	5.70148	5.77452	6.29063	6.25226	6.08875	5.83741	5.80691	6.02108	6.31902	6.30264	6.31743	0.44063	1.3572	0.00025714	0.00274349	3.58983	0.118467	1.08558	0.240595	0.465834	0.542935	1.45693	2.58507e-05	0.000206926
ENSG00000256980	KHDC1L	2.51913	2.55489	2.55337	2.82668	2.93455	3.00216	2.54525	2.45516	2.52481	3.20346	3.01432	3.25547	0.37849	1.29998	0.000258511	0.00275618	3.58752	-0.0340457	0.976678	0.692512	0.852274	0.614956	1.53151	7.15459e-07	1.1406e-05
ENSG00000152492	CCDC50	6.32139	6.31064	6.35942	6.54108	6.57317	6.70937	6.33157	6.24398	6.39171	6.47398	6.5388	6.59291	0.277315	1.21194	0.000258762	0.00275691	3.5871	-0.00796586	0.994494	0.898054	0.970632	0.204593	1.15236	0.00353922	0.0118435
ENSG00000158470	B4GALT5	8.62545	8.40946	8.60787	8.85163	8.89306	8.91445	8.46053	8.47951	8.66141	8.60259	8.59915	8.69047	0.33889	1.26478	0.000259602	0.0027628	3.58569	-0.0135794	0.990632	0.857922	0.950106	0.0831502	1.05933	0.279161	0.408109
ENSG00000176087	SLC35A4	6.66615	6.65795	6.37711	6.24508	6.19909	6.09444	6.65024	6.61253	6.4983	6.38418	6.29862	6.138	-0.387788	0.764301	0.000259791	0.0027628	3.58538	0.0195131	1.01362	0.817211	0.925644	-0.293363	0.815998	0.00278403	0.00968756
ENSG00000187837	HIST1H1C	3.24066	3.26378	3.28547	4.10876	3.65007	4.24525	3.56939	3.69584	3.58679	4.6178	4.56037	4.85234	0.737749	1.66757	0.000259907	0.0027628	3.58518	0.35409	1.27818	0.0464984	0.152655	1.41278	2.6625	5.23941e-08	1.4258e-06
ENSG00000161558	TMEM143	1.5296	1.73636	1.51141	2.09802	2.14479	2.21288	1.70877	1.55584	1.42738	1.96104	2.25152	1.86263	0.559187	1.47344	0.000260233	0.0027628	3.58464	-0.0286793	0.980317	0.821238	0.928262	0.432919	1.34996	0.00252885	0.00894956
ENSG00000153561	RMND5A	7.18149	7.08091	7.25227	6.81384	6.7915	6.87517	7.18554	7.36549	7.37384	6.99304	7.0383	7.10159	-0.344597	0.787528	0.00026025	0.0027628	3.58461	0.136971	1.09959	0.0808188	0.224085	-0.127254	0.915573	0.105295	0.189844
ENSG00000243701	RP11-446H18.3	1.94489	2.4999	2.34835	1.69645	1.66498	1.41912	2.31859	2.21725	2.65415	1.70793	1.7856	1.9149	-0.67074	0.628184	0.000260408	0.0027628	3.58435	0.132467	1.09617	0.360724	0.591379	-0.461969	0.725995	0.00538504	0.0166143
ENSG00000166669	ATF7IP2	2.84181	2.79277	3.01969	2.23242	2.25396	2.61468	3.14386	3.0978	3.31474	2.78132	2.66016	2.76085	-0.517768	0.698452	0.000260864	0.0027657	3.58359	0.301247	1.23221	0.0121269	0.0588715	-0.150271	0.901081	0.190324	0.303036
ENSG00000115825	PRKD3	4.49467	4.33176	4.74711	3.88306	3.89969	4.04278	3.90424	4.03721	4.13607	3.18435	3.10741	3.53398	-0.58212	0.667982	0.000261692	0.00277254	3.58221	-0.497748	0.708211	0.00104422	0.00930712	-1.24973	0.420526	3.64576e-08	1.09669e-06
ENSG00000139547	RDH16	-0.344597	-0.125615	-0.0821459	-0.882763	-0.735283	-0.751611	-0.204111	-0.160176	-0.25836	-0.492209	-0.544177	-0.632743	-0.605743	0.657133	0.00026195	0.00277334	3.58178	-0.0233965	0.983914	0.860722	0.951469	-0.372135	0.772638	0.0116921	0.0314744
ENSG00000132967	HMGB1P5	5.81733	5.90718	5.81733	5.22879	5.23526	5.50811	5.63055	5.74598	5.30863	5.22031	5.10874	4.85457	-0.523638	0.695616	0.000262912	0.00277895	3.58019	-0.285836	0.820266	0.0214819	0.0886948	-0.7852	0.580272	3.10245e-06	3.6747e-05
ENSG00000023041	ZDHHC6	7.01515	7.11984	7.16264	6.68375	6.72738	6.87925	6.71075	6.65795	6.75291	6.41123	6.33208	6.52729	-0.335824	0.792332	0.000262975	0.00277895	3.58009	-0.391904	0.762123	5.40403e-05	0.00093315	-0.675887	0.625947	5.69833e-08	1.51566e-06
ENSG00000112033	PPARD	4.96441	4.84761	4.78087	5.2339	5.16821	5.1869	4.92687	4.78776	4.86021	5.31399	5.24347	5.25944	0.331897	1.25867	0.000263112	0.00277895	3.57986	-0.00623089	0.99569	0.933879	0.99016	0.407918	1.32677	2.72662e-05	0.000216204
ENSG00000102218	RP2	4.45357	4.40085	4.58578	4.96109	4.88544	4.94197	4.5804	4.74227	4.67374	4.87357	4.94367	4.98768	0.449786	1.36584	0.000263293	0.00277895	3.57956	0.185806	1.13745	0.0801838	0.222854	0.454977	1.37076	0.000228078	0.00123276
ENSG00000137343	ATAT1	3.5431	3.5438	3.77161	3.27293	3.16821	3.13437	3.82212	3.79383	3.94727	3.49599	3.40209	3.48741	-0.427045	0.743784	0.000263396	0.00277895	3.57939	0.23547	1.17729	0.0171278	0.075432	-0.15726	0.896727	0.102984	0.186473
ENSG00000239305	RNF103	4.55676	4.48561	4.63696	4.08739	4.116	4.23742	4.90596	5.00942	4.94792	4.47659	4.41469	4.58386	-0.412764	0.751183	0.000263677	0.00277997	3.57893	0.39495	1.3149	0.000241415	0.00308348	-0.0681967	0.953829	0.447935	0.584486
ENSG00000203326	ZNF525	3.35522	3.42909	3.62666	3.95216	3.99672	4.17316	3.24453	3.25462	3.47943	3.6289	3.69393	3.912	0.570514	1.48505	0.000265738	0.00279908	3.57555	-0.143518	0.905309	0.287953	0.516988	0.274164	1.20929	0.0450568	0.0951136
ENSG00000125821	DTD1	5.14797	5.29409	5.02235	4.5172	4.66471	4.55475	5.206	4.99909	4.90491	4.58512	4.61338	4.34276	-0.576338	0.670664	0.000265858	0.00279908	3.57535	-0.118741	0.920991	0.345349	0.576506	-0.640648	0.641425	9.12943e-05	0.000581072
ENSG00000049089	COL9A2	0.957123	1.04618	0.734522	1.47578	1.35767	1.31103	0.669404	0.703229	0.447967	1.10317	1.16076	1.23717	0.468762	1.38392	0.000266797	0.0028039	3.57382	-0.305979	0.808893	0.00924753	0.0482125	0.2541	1.19259	0.0244523	0.0576987
ENSG00000158604	TMED4	5.83004	5.94566	5.83576	5.60705	5.59912	5.58125	6.07023	5.98812	5.97952	5.8294	5.81475	5.82376	-0.274771	0.826581	0.000266834	0.0028039	3.57376	0.141982	1.10342	0.0275995	0.105839	-0.0479635	0.967301	0.430102	0.566868
ENSG00000130175	PRKCSH	7.67384	7.6504	7.49959	8.04418	7.8878	7.84737	7.71961	7.6456	7.65641	8.09051	8.03377	7.92486	0.318444	1.24699	0.000266871	0.0028039	3.5737	0.0657495	1.04663	0.362436	0.592697	0.408507	1.32731	1.73247e-05	0.000149239
ENSG00000185896	LAMP1	7.38686	7.36728	7.31466	7.73822	7.69622	7.58357	7.48591	7.44434	7.47141	7.96282	7.97976	7.76695	0.316438	1.24525	0.00026803	0.00281413	3.57182	0.110886	1.07989	0.130237	0.309632	0.54716	1.46121	3.63613e-07	6.53942e-06
ENSG00000109472	CPE	5.77318	5.76235	5.78295	5.37024	5.52478	5.53655	6.14813	6.02508	6.12739	5.90728	5.84922	5.85201	-0.295742	0.814653	0.000269809	0.00283085	3.56894	0.327397	1.25475	6.99101e-05	0.0011571	0.0967912	1.06939	0.145307	0.245104
ENSG00000112031	MTRF1L	6.24807	6.29176	6.32921	5.91523	5.95857	6.06542	6.27456	6.30264	6.25127	6.17029	6.15304	6.01177	-0.310001	0.806641	0.000270333	0.00283438	3.5681	-0.0134701	0.990707	0.843133	0.940972	-0.177579	0.884186	0.0172772	0.0434251
ENSG00000150459	SAP18	7.49959	7.58567	7.46502	7.20259	7.20873	7.25518	7.50078	7.4036	7.39668	7.30319	7.31847	7.31976	-0.294738	0.81522	0.000270622	0.00283545	3.56764	-0.0832093	0.943955	0.211558	0.42926	-0.20308	0.868694	0.00567556	0.0173517
ENSG00000049283	EPN3	4.26351	4.19239	3.9596	4.6686	4.52505	4.47491	5.13314	5.06655	5.18888	5.41626	5.53626	5.36175	0.417369	1.33549	0.000271317	0.00284077	3.56652	0.990537	1.98692	2.65984e-09	4.28998e-07	1.29929	2.46108	2.95065e-11	6.21316e-09
ENSG00000101132	PFDN4	5.55523	5.80194	5.84994	5.05325	5.19826	5.42536	5.6029	5.6559	5.58786	5.24509	5.24037	5.50592	-0.510301	0.702076	0.000272381	0.00284949	3.56482	-0.120008	0.920183	0.288639	0.517929	-0.405783	0.754827	0.00192605	0.00715708
ENSG00000002549	LAP3	6.56428	6.64211	6.52503	6.25959	6.26231	6.2829	6.61323	6.55154	6.5558	6.37695	6.3736	6.16136	-0.309024	0.807188	0.000272525	0.00284949	3.56459	-0.00376621	0.997393	0.955745	1	-0.272832	0.827693	0.000836286	0.00358162
ENSG00000150867	PIP4K2A	6.09086	6.04725	6.09964	6.31823	6.36615	6.26913	5.95552	6.05171	6.00393	6.11123	6.09705	6.01008	0.238698	1.17993	0.000273315	0.00285577	3.56334	-0.0754559	0.949042	0.173313	0.376555	-0.00619221	0.995717	0.908052	0.959772
ENSG00000118515	SGK1	3.16821	3.1696	2.93749	2.34354	2.34807	2.62391	2.90375	2.91628	2.91811	2.24174	2.19455	1.95068	-0.654049	0.635494	0.000273554	0.0028563	3.56296	-0.179506	0.883005	0.214511	0.43343	-0.962513	0.513162	4.30709e-06	4.75946e-05
ENSG00000260114	CTD-2574D22.4	0.0373987	0.119228	0.318386	0.867447	0.649721	0.792968	0.163429	0.547757	0.434598	0.708022	1.00564	0.567726	0.611832	1.5282	0.000274783	0.00286511	3.56101	0.223751	1.16777	0.116474	0.28676	0.602472	1.51832	0.000316747	0.00162018
ENSG00000126790	L3HYPDH	1.13993	1.09293	1.13679	1.88188	1.89192	1.78087	1.30107	1.09293	1.06781	1.63892	1.97033	1.7426	0.728445	1.65685	0.000274893	0.00286511	3.56084	0.0306948	1.0215	0.85292	0.946935	0.660736	1.58089	0.00069032	0.00306022
ENSG00000130312	MRPL34	4.40499	4.4806	4.39486	5.00606	5.16283	4.7252	4.30212	4.29481	4.14292	4.97963	5.18146	4.83364	0.538141	1.4521	0.000274965	0.00286511	3.56072	-0.180455	0.882425	0.162699	0.360777	0.571894	1.48647	0.000142601	0.000838556
ENSG00000117632	STMN1	9.04574	9.19857	9.13126	8.67121	8.74773	8.86346	8.91445	8.92605	8.71658	8.61362	8.57399	8.44916	-0.364511	0.776732	0.000275396	0.00286764	3.56004	-0.272912	0.827647	0.00323965	0.0221245	-0.5794	0.669242	1.40075e-06	1.97185e-05
ENSG00000182308	DCAF4L1	0.358613	0.478056	0.644681	-0.584963	0.000558265	-0.396791	0.431911	0.431911	0.268614	-0.680543	-0.205445	0.0237525	-0.820743	0.56615	0.000275649	0.0028683	3.55964	-0.116223	0.9226	0.522729	0.732524	-0.781494	0.581764	0.000435178	0.00209718
ENSG00000171889	MIR31HG	1.28638	1.25265	1.30856	0.824871	0.947057	0.70494	1.6147	1.45646	1.4786	1.2782	1.18058	1.30771	-0.45681	0.728596	0.000275884	0.00286877	3.55927	0.23406	1.17614	0.0297097	0.111603	-0.0270662	0.981414	0.788335	0.874474
ENSG00000245937	CTC-228N24.3	3.68921	3.70767	3.31219	4.13389	4.11848	4.11438	3.53938	3.47386	3.23686	4.16271	3.92545	3.82372	0.551765	1.46588	0.000276182	0.0028699	3.55881	-0.154018	0.898744	0.241736	0.466934	0.401045	1.32046	0.00430618	0.0138582
ENSG00000166025	AMOTL1	6.32921	6.18207	6.39151	6.65405	6.64874	6.60857	6.32212	6.41959	6.50464	6.49455	6.45541	6.61323	0.336465	1.26266	0.00027687	0.00287509	3.55772	0.114831	1.08285	0.14211	0.329893	0.220091	1.16481	0.00854493	0.0243103
ENSG00000256704	SDCCAG3P1	-0.402287	-0.291414	-0.0944498	0.624015	0.275544	0.260722	-0.00410896	-0.434982	-0.0770418	0.57217	0.36186	0.0924797	0.649679	1.56882	0.000277351	0.00287811	3.55697	0.0907698	1.06494	0.537149	0.742836	0.605379	1.52138	0.000541153	0.00249982
ENSG00000136888	ATP6V1G1	6.84648	6.9438	6.85246	6.534	6.49181	6.66715	6.95415	6.95651	6.82812	6.70108	6.63408	6.76218	-0.316809	0.802844	0.000277735	0.00288012	3.55637	0.0318686	1.02234	0.648111	0.822673	-0.182052	0.881448	0.0172633	0.0433972
ENSG00000135406	PRPH	0.778861	0.625903	0.429579	-0.0985542	0.260166	0.0390111	0.588331	0.921273	0.741014	0.042969	-0.00866465	0.18913	-0.544729	0.68552	0.000279897	0.00290056	3.553	0.13864	1.10087	0.257145	0.484476	-0.537251	0.689083	0.000317009	0.00162097
ENSG00000119812	FAM98A	7.18826	7.18149	7.20933	6.95932	6.95759	7.01119	7.21358	7.18826	7.30319	7.01948	7.02405	7.02405	-0.217005	0.86035	0.00028047	0.00290436	3.55211	0.0420519	1.02958	0.385963	0.615322	-0.170469	0.888554	0.00225823	0.00814779
ENSG00000023445	BIRC3	3.87456	4.08722	4.10941	3.54183	3.44144	3.65861	4.09559	4.24013	4.32233	3.68944	3.77391	4.02707	-0.476476	0.718731	0.000280646	0.00290436	3.55184	0.195927	1.14546	0.0666653	0.196843	-0.194503	0.873874	0.0744369	0.143125
ENSG00000177606	JUN	4.44134	4.63924	4.64487	5.03762	5.02017	4.93734	4.67804	4.83924	4.81496	4.95039	5.19475	5.21307	0.423451	1.34113	0.000281749	0.00291223	3.55014	0.202445	1.15065	0.0466996	0.153109	0.54379	1.4578	1.71945e-05	0.00014837
ENSG00000137941	TTLL7	4.34135	4.24402	4.38616	3.8722	3.86825	3.95257	4.26998	4.45566	4.28225	3.57214	3.71801	3.87189	-0.426036	0.744304	0.000281791	0.00291223	3.55007	0.0123562	1.0086	0.893506	0.969404	-0.603795	0.658021	6.57477e-06	6.77175e-05
ENSG00000189091	SF3B3	8.67317	8.59138	8.56935	8.393	8.38652	8.35145	8.43081	8.43974	8.533	8.24902	8.21323	8.17891	-0.234327	0.850082	0.000283121	0.00292369	3.54803	-0.143459	0.905346	0.0125529	0.0605001	-0.397528	0.759158	6.00592e-07	9.84387e-06
ENSG00000186594	MIR22HG	1.83296	1.74675	1.93727	0.812817	0.897676	0.995071	2.61001	2.54803	2.62494	1.0011	1.67309	1.99596	-0.937005	0.522316	0.000283286	0.00292369	3.54777	0.755552	1.68828	0.00112654	0.00982148	-0.283245	0.82174	0.180264	0.290527
ENSG00000106591	MRPL32	6.2235	6.36654	6.23748	5.88109	5.90633	5.91949	6.29236	6.13303	6.22578	6.07859	5.93603	6.01616	-0.373689	0.771806	0.000284102	0.00292663	3.54653	-0.0589297	0.959976	0.477529	0.698824	-0.265655	0.831821	0.00466261	0.0147822
ENSG00000150776	C11orf57	5.94237	5.97355	5.96643	5.71006	5.72744	5.6663	6.09482	6.12019	6.06102	5.84693	5.74426	5.90948	-0.259465	0.835398	0.000284263	0.00292663	3.54628	0.13121	1.09521	0.031811	0.117459	-0.127432	0.91546	0.0379687	0.082924
ENSG00000177731	FLII	7.80086	7.74741	7.60578	8.10365	8.00692	7.94375	7.84893	7.77682	7.80544	8.14287	8.1493	8.03246	0.300018	1.23116	0.000284338	0.00292663	3.54617	0.0922097	1.066	0.183532	0.391851	0.390207	1.31058	1.59054e-05	0.000139228
ENSG00000137502	RAB30	4.06268	3.84938	4.26845	2.99534	3.03513	3.33366	4.18915	4.334	4.50073	3.13745	2.97492	3.75674	-0.938457	0.521791	0.000284344	0.00292663	3.54616	0.282106	1.21597	0.15505	0.349566	-0.771909	0.585642	0.00142988	0.0055971
ENSG00000100241	SBF1	6.74088	6.64894	6.72394	7.23469	7.11693	6.92548	6.84268	6.8604	6.99304	7.14644	7.26477	7.1715	0.38807	1.30864	0.000284549	0.00292676	3.54584	0.194253	1.14413	0.0375076	0.13203	0.489735	1.40419	2.23358e-05	0.000182749
ENSG00000069275	NUCKS1	8.33926	8.22884	8.32391	8.62545	8.72009	8.67317	8.12998	8.12027	8.00692	8.38115	8.38652	8.28	0.375615	1.29739	0.000285167	0.00292934	3.5449	-0.211589	0.863586	0.0223127	0.0911321	0.0521042	1.03678	0.540564	0.671377
ENSG00000267858	AC016629.8	1.42254	1.55188	1.37657	2.11333	2.03991	1.9738	2.10714	2.12114	1.76255	2.31447	2.12216	2.0729	0.592029	1.50737	0.000285186	0.00292934	3.54487	0.54633	1.46037	0.000619299	0.00623866	0.71992	1.64709	3.30025e-05	0.000252193
ENSG00000023228	NDUFS1	7.34227	7.33528	7.30477	6.96089	7.00483	7.01623	7.29965	7.2792	7.1601	6.88694	6.91028	6.98834	-0.333531	0.793592	0.000286248	0.00293826	3.54326	-0.0812141	0.945262	0.280111	0.508774	-0.39915	0.758305	4.41294e-05	0.000322122
ENSG00000100911	PSME2	6.36423	6.53296	6.29645	5.86763	5.90948	5.92998	6.41815	6.35016	6.18888	6.12359	6.07499	5.86587	-0.49583	0.709153	0.000286869	0.00294264	3.54232	-0.0791836	0.946593	0.470423	0.692771	-0.376116	0.770509	0.00291463	0.0100635
ENSG00000143643	TTC13	3.92335	3.77033	3.76312	4.18666	4.32379	4.39223	3.54787	3.69584	3.62557	4.16706	4.15351	4.28868	0.481634	1.39632	0.000287517	0.00294729	3.54134	-0.19589	0.873034	0.0958836	0.25194	0.383635	1.30463	0.00218211	0.00791963
ENSG00000102753	KPNA3	6.99506	6.89676	7.00776	7.14503	7.24179	7.21743	6.81161	6.77283	6.80764	6.96345	6.96832	7.00126	0.234967	1.17688	0.000288181	0.0029521	3.54033	-0.169056	0.889424	0.00509995	0.0308664	0.0111883	1.00779	0.832763	0.906656
ENSG00000265202	RP13-923O23.7	0.747184	-0.162114	0.405491	1.13955	1.23956	1.24113	0.431911	0.764357	0.538195	1.06893	1.19953	1.40934	0.876719	1.8362	0.000289012	0.00295862	3.53908	0.248177	1.18771	0.222456	0.443654	0.895585	1.86036	0.000230984	0.00124492
ENSG00000179455	MKRN3	3.07652	2.90332	3.20187	2.50134	2.6266	2.45161	2.99129	3.16475	3.07733	2.36924	2.50998	2.61228	-0.533446	0.690903	0.000289541	0.00296081	3.53829	0.0177697	1.01239	0.877599	0.960026	-0.563493	0.676662	0.000165806	0.0009461
ENSG00000170581	STAT2	5.05418	4.99848	4.93793	4.58362	4.52963	4.59265	5.28079	5.3067	5.24601	4.82352	4.78935	4.90064	-0.428402	0.743084	0.000289617	0.00296081	3.53818	0.280807	1.21487	0.00641221	0.036838	-0.159439	0.895373	0.103036	0.186507
ENSG00000178075	GRAMD1C	2.58967	2.00709	2.51356	1.69645	1.80237	1.82663	2.27348	2.46274	2.30213	1.80052	1.91776	1.95687	-0.594395	0.662322	0.000290589	0.00296752	3.53672	-0.0233435	0.98395	0.856898	0.949457	-0.478033	0.717956	0.00187817	0.00701181
ENSG00000102078	SLC25A14	2.38886	2.705	2.54309	1.95068	2.16551	2.11298	2.36519	2.39205	2.46797	2.28129	2.32602	2.09641	-0.469528	0.722201	0.000290665	0.00296752	3.53661	-0.137343	0.909192	0.194641	0.407252	-0.310688	0.806257	0.00747437	0.0217921
ENSG00000139350	NEDD1	6.24975	6.20244	6.30613	5.82925	5.95389	5.89748	5.72136	5.77755	5.79205	5.27539	5.26958	5.42567	-0.359139	0.77963	0.000291627	0.00297534	3.53517	-0.488963	0.712537	1.0781e-05	0.000273541	-0.929506	0.525038	1.97025e-09	1.29312e-07
ENSG00000176903	PNMA1	5.63369	5.59079	5.46612	5.28719	5.29826	5.29102	5.54732	5.5446	5.49307	5.22859	5.24925	5.17552	-0.271583	0.82841	0.000292916	0.00298649	3.53326	-0.0354363	0.975737	0.557676	0.758617	-0.345788	0.786878	2.26022e-05	0.00018463
ENSG00000166167	BTRC	6.00633	5.87244	6.09378	6.30069	6.35382	6.44501	6.09359	6.21033	6.32389	6.37184	6.45348	6.57805	0.375805	1.29756	0.000293675	0.00299221	3.53213	0.218785	1.16375	0.0179835	0.0780779	0.476809	1.39166	2.15892e-05	0.000177888
ENSG00000250132	RP11-359B12.1	0.371725	0.672967	0.0735951	0.895978	0.998444	1.20498	0.532801	0.27492	0.363638	0.934579	0.792396	0.923904	0.659949	1.58003	0.000294053	0.00299405	3.53157	0.0173665	1.01211	0.907831	0.975936	0.510535	1.42458	0.00276222	0.00963377
ENSG00000186564	FOXD2	1.65338	1.65057	1.70253	0.993718	1.11756	0.94312	0.971132	1.35533	1.4476	1.19421	1.11876	0.720827	-0.650607	0.637012	0.000297135	0.00302339	3.52705	-0.410654	0.752282	0.0105899	0.0531284	-0.657012	0.63419	0.000267568	0.00140415
ENSG00000087088	BAX	5.21925	5.34005	5.2516	4.96717	4.99437	4.93632	6.115	5.96738	6.0329	6.145	5.96963	5.98782	-0.304398	0.80978	0.000297548	0.00302557	3.52644	0.767997	1.7029	8.62502e-10	1.65524e-07	0.76399	1.69818	9.08188e-10	7.32395e-08
ENSG00000164970	FAM219A	4.11487	3.98234	4.2225	3.69304	3.62584	3.65111	4.32553	4.3601	4.58219	4.09235	3.90216	4.24663	-0.44944	0.732327	0.000298101	0.00302916	3.52564	0.316658	1.24544	0.00372155	0.0246064	-0.026461	0.981826	0.78665	0.873473
ENSG00000067141	NEO1	5.90046	5.72599	5.78648	6.27439	6.22951	6.16604	5.67253	5.78914	6.03029	6.08778	6.11575	6.18061	0.41912	1.33711	0.000299912	0.00304552	3.52301	0.0265418	1.01857	0.782116	0.905486	0.323581	1.25143	0.0028449	0.00985413
ENSG00000084774	CAD	8.25728	8.08748	8.10365	8.52412	8.43974	8.37613	8.04827	7.97976	8.09917	8.32902	8.30369	8.13983	0.297246	1.2288	0.00030038	0.00304713	3.52233	-0.107073	0.92847	0.126552	0.304114	0.108295	1.07795	0.119736	0.20994
ENSG00000073350	LLGL2	6.18571	6.17072	6.16458	6.81841	6.69472	6.54062	6.23887	6.09111	5.94739	6.53352	6.71803	6.55623	0.511111	1.42515	0.000300472	0.00304713	3.5222	-0.0813546	0.94517	0.493108	0.710971	0.428969	1.34627	0.00146502	0.00571863
ENSG00000152465	NMT2	4.87357	4.85169	4.80523	5.14715	5.18955	5.10003	4.61905	4.68915	4.79875	4.9296	4.9758	4.8131	0.302046	1.23289	0.000300952	0.00304995	3.5215	-0.141164	0.906787	0.0556953	0.173565	0.0629583	1.04461	0.365169	0.501251
ENSG00000101846	STS	1.60871	1.80457	1.49918	2.35926	2.40996	2.54504	1.83669	1.60871	1.57342	2.20763	2.37558	2.018	0.800161	1.7413	0.000301545	0.00305393	3.52065	0.0351395	1.02466	0.850594	0.94568	0.563331	1.47768	0.00586212	0.017825
ENSG00000170854	MINA	6.02688	6.04018	5.99244	6.26212	6.20577	6.31704	5.98863	5.88972	5.89886	6.11829	6.07918	6.13426	0.24168	1.18237	0.000301978	0.00305627	3.52002	-0.0941971	0.936793	0.101207	0.261443	0.0906169	1.06483	0.110326	0.196783
ENSG00000109466	KLHL2	5.31813	5.19826	5.46312	4.77778	4.94715	5.0524	5.29244	5.22281	5.41224	4.88932	4.95995	5.10974	-0.400608	0.757539	0.000302283	0.00305732	3.51959	-0.01686	0.988382	0.848291	0.944547	-0.340368	0.78984	0.00124125	0.00498022
ENSG00000170027	YWHAG	8.83197	8.80668	8.85964	9.1211	9.14729	9.03064	8.88509	9.03347	8.93838	9.08127	9.13559	9.16111	0.267006	1.20331	0.000303046	0.00306298	3.51849	0.119598	1.08643	0.0602492	0.183348	0.293176	1.22534	0.000115745	0.000708339
ENSG00000196083	IL1RAP	1.65338	1.54518	1.73636	2.31003	2.5354	2.49075	1.84657	2.07556	1.81561	2.20763	2.10499	2.83439	0.800434	1.74163	0.000303516	0.00306569	3.51782	0.267731	1.20391	0.160206	0.357616	0.735629	1.66512	0.000672624	0.00299139
ENSG00000070831	CDC42	8.69346	8.74773	8.7431	8.41182	8.52098	8.57127	8.69346	8.70892	8.669	8.51235	8.54983	8.62168	-0.226812	0.854521	0.000305042	0.00307906	3.51564	-0.0376383	0.974248	0.462288	0.685788	-0.166946	0.890727	0.00394639	0.0129114
ENSG00000161091	MFSD12	5.44332	5.55976	5.52858	6.03469	5.96339	5.80884	5.52498	5.47078	5.40581	5.92049	6.02614	5.81986	0.425274	1.34283	0.00030532	0.00307981	3.51525	-0.0434278	0.970347	0.65832	0.830142	0.411899	1.33044	0.000408425	0.00199232
ENSG00000116213	WRAP73	5.75142	5.83261	5.91129	5.54282	5.46902	5.5351	6.2916	6.21973	6.23482	6.17128	6.05491	6.28017	-0.315995	0.803297	0.000305622	0.00308081	3.51481	0.41706	1.3352	1.0249e-05	0.000264261	0.336841	1.26299	0.000115775	0.000708339
ENSG00000164172	MOCS2	5.16257	5.30337	5.25854	4.82079	4.97468	4.96611	5.13041	5.23444	5.12154	5.09738	4.99175	5.01127	-0.321109	0.800454	0.000306758	0.00309021	3.5132	-0.0793937	0.946455	0.274036	0.502135	-0.207876	0.865811	0.00899245	0.0253128
ENSG00000127585	FBXL16	4.82209	4.78528	4.83307	5.3177	5.38504	5.09415	4.82287	4.69671	4.86633	5.20925	5.37568	5.14369	0.452496	1.36841	0.000308334	0.00310402	3.51098	-0.0180619	0.987559	0.863285	0.952854	0.429775	1.34702	0.000495838	0.00232305
ENSG00000128335	APOL2	4.00385	3.98234	3.92254	3.57899	3.43463	3.61055	4.15259	4.22906	3.98534	3.84961	3.54247	3.6609	-0.428425	0.743073	0.00030893	0.00310795	3.51014	0.152486	1.11148	0.113519	0.282086	-0.28504	0.820719	0.00741348	0.0216354
ENSG00000179240	RP11-111M22.2	1.08872	1.12438	1.14815	0.58986	0.586139	0.773771	0.163429	0.18756	0.296418	0.126572	0.308531	0.29854	-0.470546	0.721691	0.00031082	0.00312023	3.50749	-0.904569	0.534192	1.31043e-07	8.63798e-06	-0.875958	0.544892	2.01275e-07	4.0099e-06
ENSG00000112218	GPR63	2.06898	1.76287	1.61362	2.38726	2.69431	2.60034	1.63788	1.53054	1.77208	2.13679	1.82021	2.09641	0.745054	1.67604	0.000310897	0.00312023	3.50738	-0.168541	0.889742	0.343505	0.575457	0.202262	1.1505	0.250528	0.374934
ENSG00000255641	NKG2-E	2.06759	2.16397	1.96026	1.46966	1.07375	1.54773	1.88762	1.72655	1.89115	0.699628	1.28569	1.20498	-0.700585	0.615323	0.000310933	0.00312023	3.50733	-0.229089	0.853173	0.153767	0.347816	-1.00115	0.499601	6.47522e-06	6.68739e-05
ENSG00000189403	HMGB1	9.62186	9.69947	9.68059	9.22075	9.26905	9.45222	9.40601	9.41561	9.08718	9.01321	8.98954	8.81905	-0.35342	0.782726	0.000310973	0.00312023	3.50728	-0.364467	0.776756	0.000230856	0.00297873	-0.72645	0.604389	5.10952e-08	1.40846e-06
ENSG00000049167	ERCC8	4.60503	4.70465	4.6195	4.30643	4.3531	4.32897	4.72925	4.78573	4.72997	4.46081	4.41839	4.44795	-0.313698	0.804577	0.000311869	0.0031261	3.50603	0.105128	1.07559	0.139502	0.325483	-0.200797	0.87007	0.00968031	0.026934
ENSG00000162777	DENND2D	4.31199	4.38862	4.3203	4.74386	4.76235	4.78794	4.492	4.35413	4.64777	4.98733	4.86943	4.74036	0.424259	1.34188	0.000311971	0.0031261	3.50589	0.157685	1.1155	0.118576	0.289956	0.525956	1.43989	2.94308e-05	0.000229527
ENSG00000121879	PIK3CA	5.69241	5.53736	5.87895	5.27154	5.21641	5.33373	5.53026	5.75364	5.76547	5.14832	5.09527	5.21138	-0.428659	0.742952	0.000317262	0.00317702	3.49858	-0.019239	0.986753	0.839355	0.938663	-0.551031	0.682532	2.30039e-05	0.000187506
ENSG00000160688	FLAD1	6.08542	6.25006	5.90511	5.71886	5.61936	5.62789	6.01086	5.76844	5.78747	5.59642	5.47078	5.5156	-0.425188	0.744742	0.000317926	0.00317983	3.49767	-0.225118	0.855525	0.0280915	0.107166	-0.552904	0.681647	2.01164e-05	0.000168686
ENSG00000002746	HECW1	2.04819	1.94847	1.87287	2.44287	2.37808	2.25865	2.18417	2.05226	2.16516	2.75735	2.52997	2.59722	0.403411	1.32263	0.000317962	0.00317983	3.49762	0.177209	1.13069	0.0680609	0.199588	0.671819	1.59308	6.81503e-07	1.09221e-05
ENSG00000108559	NUP88	7.06333	7.1205	7.08647	6.73236	6.86222	6.86888	6.94064	6.86463	6.88574	6.71223	6.69662	6.63222	-0.269054	0.829864	0.000319098	0.00318909	3.49608	-0.193141	0.874699	0.00487486	0.0298617	-0.409607	0.752828	2.94146e-06	3.52605e-05
ENSG00000260708	CTA-29F11.1	2.00709	2.12114	2.24768	1.63496	1.35767	1.78087	1.91844	1.98225	1.99234	1.403	1.21388	1.50544	-0.534018	0.690629	0.000320344	0.00319943	3.49438	-0.160683	0.894601	0.188831	0.398617	-0.751138	0.594135	8.01147e-06	7.91799e-05
ENSG00000128708	HAT1	7.17981	7.26306	7.21101	6.73698	6.86888	6.87691	6.81093	6.87925	6.62253	6.60528	6.56542	6.19732	-0.390494	0.762868	0.000321356	0.00320742	3.49301	-0.44718	0.733475	8.30155e-05	0.00133639	-0.761131	0.590034	1.23018e-07	2.70693e-06
ENSG00000237424	FOXD2-AS1	2.53777	2.68269	2.45195	1.77339	1.86439	2.1826	2.15155	2.13559	2.41361	2.04914	1.89635	1.8861	-0.618062	0.651546	0.000321807	0.00320791	3.4924	-0.324086	0.798804	0.0287785	0.10916	-0.613685	0.653526	0.000336086	0.00170187
ENSG00000093010	COMT	5.49722	5.41893	5.35133	5.97511	5.88669	5.72479	5.38536	5.23636	5.22859	5.91229	6.01297	5.74371	0.439773	1.35639	0.000321827	0.00320791	3.49238	-0.139275	0.907975	0.185575	0.394703	0.467474	1.38269	0.00017011	0.000965932
ENSG00000107521	HPS1	4.68611	4.69331	4.56718	5.04486	4.99437	5.00457	4.6364	4.59779	4.60042	5.05673	5.06019	4.96897	0.365516	1.28834	0.000322801	0.0032155	3.49106	-0.037601	0.974274	0.658716	0.830288	0.379771	1.30114	0.00021425	0.0011769
ENSG00000259536	RP11-111A22.1	0.257479	0.109235	0.294545	-0.506259	-0.456215	-0.42737	0.0043206	0.220569	-0.0761728	-0.0609267	-0.649764	-0.109181	-0.683638	0.622593	0.000323632	0.00322166	3.48995	-0.170787	0.888358	0.275006	0.503181	-0.493709	0.710197	0.0047142	0.0149086
ENSG00000168259	DNAJC7	6.60288	6.66126	6.77726	6.96676	7.03099	7.07362	6.59603	6.49486	6.67445	7.09346	7.0506	6.95869	0.343424	1.26876	0.000323956	0.0032219	3.48951	-0.0918074	0.938346	0.255758	0.48253	0.354191	1.27827	0.000234497	0.00126169
ENSG00000141480	ARRB2	4.89837	5.13995	4.79684	4.41839	4.41189	4.45977	4.87336	4.73267	4.65997	4.68322	4.44692	4.1676	-0.515632	0.699487	0.000324081	0.0032219	3.48935	-0.190384	0.876373	0.108996	0.275383	-0.511529	0.701478	0.000337963	0.00170739
ENSG00000158796	DEDD	5.18841	5.23132	5.03816	4.82896	4.86232	4.8131	5.37373	5.2056	5.29121	4.94828	4.91133	4.98106	-0.318133	0.802107	0.000324519	0.00322414	3.48876	0.137188	1.09976	0.063476	0.19019	-0.206198	0.866818	0.00924522	0.0259016
ENSG00000162105	SHANK2	3.66175	3.47508	3.40541	4.13633	4.04672	3.99159	3.5973	3.55744	3.73445	3.93464	3.95924	4.18039	0.544065	1.45808	0.000325692	0.00323367	3.48719	0.115515	1.08336	0.368315	0.59806	0.509625	1.42368	0.000595478	0.00269494
ENSG00000153904	DDAH1	5.78135	5.80946	5.74854	6.04443	6.03247	6.02881	5.47893	5.54671	5.48316	5.79184	5.85325	5.66411	0.255388	1.19366	0.000327395	0.00324845	3.48493	-0.276929	0.825346	0.000189028	0.0025514	-0.00979595	0.993233	0.867061	0.931452
ENSG00000102024	PLS3	7.40245	7.37507	7.47022	7.1253	7.17762	7.20219	7.32218	7.35284	7.33949	7.02884	7.14866	7.11095	-0.247492	0.842359	0.000329801	0.00327019	3.48175	-0.0776408	0.947606	0.176123	0.381022	-0.319758	0.801204	2.18526e-05	0.00017957
ENSG00000101247	NDUFAF5	4.00029	4.15011	4.09771	3.75442	3.7273	3.74494	4.0022	3.99283	4.02732	3.81919	3.83512	3.76026	-0.340516	0.789759	0.000330652	0.00327648	3.48063	-0.0752653	0.949168	0.328266	0.560456	-0.277666	0.824925	0.00186161	0.00695855
ENSG00000121064	SCPEP1	4.83831	4.86406	4.89199	4.43162	4.54109	4.60503	5.12314	5.05932	5.2349	4.74203	4.83949	4.95525	-0.339001	0.790589	0.000333228	0.00329895	3.47726	0.274476	1.20955	0.00154796	0.0126447	-0.0197098	0.986431	0.793433	0.878361
ENSG00000184992	BRI3BP	7.02233	6.9388	7.02377	6.66378	6.72984	6.68029	6.48824	6.36001	6.35861	6.21837	6.29803	6.23986	-0.30358	0.810239	0.000333355	0.00329895	3.47709	-0.592653	0.663122	1.24471e-07	8.3114e-06	-0.742796	0.59758	4.9346e-09	2.39021e-07
ENSG00000114982	KANSL3	6.37397	6.27743	6.31423	6.08476	6.06649	6.13955	6.38418	6.29597	6.35258	6.11881	6.0942	6.15707	-0.224977	0.855608	0.000334496	0.00330808	3.47561	0.0223783	1.01563	0.659148	0.830288	-0.198597	0.871397	0.00101003	0.00418849
ENSG00000090920	FCGBP	2.32387	2.38726	2.44811	2.97445	3.10059	3.08456	2.76133	3.11346	3.10741	3.41833	3.62848	3.69255	0.666822	1.58757	0.000334859	0.00330952	3.47514	0.607989	1.52413	0.000810518	0.00767537	1.19278	2.28593	2.21016e-07	4.34045e-06
ENSG00000060642	PIGV	3.617	3.3822	3.31928	3.88413	3.95216	3.8097	3.43491	3.40818	3.35357	3.96767	3.83228	3.78942	0.442386	1.35885	0.000335136	0.00331009	3.47478	-0.0409107	0.972041	0.694336	0.853203	0.423861	1.34151	0.00049286	0.00231267
ENSG00000156052	GNAQ	5.71918	5.62589	5.8121	5.08554	5.31593	5.26565	5.56138	5.64227	5.90415	5.16415	5.1591	5.40536	-0.496579	0.708785	0.000336107	0.00331555	3.47352	-0.0160555	0.988933	0.884095	0.964369	-0.476617	0.718661	0.00047691	0.00225598
ENSG00000164124	TMEM144	3.42848	3.54543	3.54183	3.08816	3.16821	3.11772	3.49171	3.36647	3.34201	3.12023	2.9175	3.06072	-0.380516	0.768163	0.000336125	0.00331555	3.4735	-0.105234	0.929654	0.225511	0.446632	-0.472371	0.720779	3.61639e-05	0.000271964
ENSG00000072952	MRVI1	1.89269	1.70968	2.00903	2.44853	2.59157	2.27063	2.02343	1.8615	1.71925	2.45569	2.58967	2.16486	0.567009	1.48145	0.00033867	0.00333847	3.47022	-0.00221586	0.998465	0.986692	1	0.534194	1.44813	0.000586989	0.00266128
ENSG00000181826	RELL1	3.29335	3.01199	3.21152	3.70289	3.63448	3.67716	2.98217	3.23585	3.19704	3.24153	2.98641	3.28815	0.499501	1.41372	0.0003394	0.00334349	3.46929	-0.0335431	0.977018	0.77602	0.901782	-0.000372779	0.999742	0.99746	0.998933
ENSG00000160767	FAM189B	5.22946	5.15136	5.33505	5.73214	5.66295	5.48447	5.25289	5.20784	5.31694	5.5931	5.66969	5.49172	0.388416	1.30896	0.000340177	0.00334897	3.4683	0.0209287	1.01461	0.816546	0.925357	0.346803	1.27174	0.0009542	0.00400738
ENSG00000261589	CTC-462L7.1	2.21653	2.27107	2.17441	1.4615	1.77727	1.46546	2.08386	2.48645	1.81561	2.0326	1.77249	1.68108	-0.652692	0.636092	0.000341557	0.00336038	3.46654	-0.0923489	0.937994	0.527436	0.735474	-0.391506	0.762334	0.0150496	0.038817
ENSG00000158864	NDUFS2	6.51509	6.4778	6.32186	6.06825	6.15647	5.92784	6.50769	6.47026	6.3808	6.18471	6.16628	5.90587	-0.387465	0.764472	0.00034252	0.00336766	3.46531	0.0143918	1.01003	0.868256	0.955475	-0.352247	0.783363	0.000795296	0.0034399
ENSG00000065150	IPO5	9.44207	9.33783	9.50199	9.14392	9.17298	9.2419	9.18232	9.23303	9.191	8.89958	8.96902	9.02007	-0.24096	0.846182	0.000343188	0.00337205	3.46447	-0.225061	0.855559	0.000645289	0.00641103	-0.464431	0.724757	1.38825e-07	2.95607e-06
ENSG00000185813	PCYT2	5.74448	5.82286	5.50347	6.20473	6.08685	6.07133	5.42195	5.47718	5.34543	6.01144	5.90337	5.83741	0.430345	1.34756	0.00034433	0.00338108	3.46303	-0.275909	0.82593	0.013328	0.063106	0.227015	1.17041	0.0321536	0.072477
ENSG00000217801	RP11-465B22.3	2.37154	2.57096	2.34835	1.93159	1.75256	2.15155	2.33481	2.34354	2.22831	2.02341	1.89635	2.15692	-0.485617	0.714192	0.000344644	0.00338197	3.46263	-0.128438	0.914821	0.246695	0.4723	-0.405469	0.754991	0.00161056	0.00617231
ENSG00000122644	ARL4A	5.92217	6.07827	6.07955	5.62241	5.73272	5.75672	6.10937	6.09599	6.00503	5.8194	5.7734	5.85405	-0.322764	0.799537	0.00034542	0.00338739	3.46165	0.0434685	1.03059	0.55028	0.753164	-0.211101	0.863877	0.00924606	0.0259016
ENSG00000106537	TSPAN13	4.65767	4.66715	4.7784	4.15557	4.23842	4.46081	4.38933	4.54781	4.36278	4.02939	4.19203	4.33058	-0.41631	0.749339	0.000346999	0.00340068	3.45967	-0.267582	0.830711	0.0101548	0.0516562	-0.517712	0.698479	3.7139e-05	0.000278414
ENSG00000068078	FGFR3	2.91926	2.78894	3.08801	3.66789	3.47508	3.34532	2.48541	2.42343	2.84056	2.82668	3.26909	3.01992	0.564915	1.4793	0.000348628	0.00341324	3.45764	-0.348192	0.785568	0.0191729	0.081583	0.106777	1.07682	0.424335	0.561471
ENSG00000138604	GLCE	4.76571	4.66038	4.85009	5.22825	5.20325	5.33478	4.59205	4.66038	4.6539	4.69428	4.72947	4.93946	0.4969	1.41118	0.000348731	0.00341324	3.45751	-0.122921	0.918326	0.304161	0.535607	0.0285957	1.02002	0.805821	0.886065
ENSG00000114439	BBX	6.2257	6.07314	6.62832	7.10688	7.15543	7.32138	6.40922	6.52552	6.84057	6.85125	6.92733	7.40453	0.88606	1.84812	0.000349182	0.00341428	3.45695	0.283601	1.21723	0.18253	0.39037	0.751657	1.68373	0.00154575	0.00597322
ENSG00000186007	LEMD1	-0.619649	-0.427951	-0.576988	0.191763	0.206907	-0.19654	-0.658624	-0.600899	-0.677236	0.0698841	0.272597	-0.205757	0.609	1.5252	0.000349288	0.00341428	3.45682	-0.104098	0.930387	0.462363	0.685832	0.587348	1.50248	0.000489159	0.00229887
ENSG00000136159	NUDT15	6.32566	6.3736	6.38939	6.00297	6.07392	6.00877	6.24439	6.25536	6.01834	5.97841	5.91188	5.76525	-0.334285	0.793177	0.000350306	0.00342203	3.45555	-0.19026	0.876448	0.0208379	0.0868399	-0.477225	0.718358	7.46069e-06	7.52071e-05
ENSG00000154310	TNIK	6.5132	6.35424	6.50109	6.95497	6.90874	6.92864	6.17697	6.31383	6.55895	6.58186	6.54862	6.69874	0.474759	1.38969	0.000350613	0.00342282	3.45517	-0.105948	0.929194	0.346867	0.578509	0.153438	1.11222	0.173636	0.282124
ENSG00000065615	CYB5R4	5.19198	5.28626	5.39482	5.00216	4.90896	5.04298	5.18473	5.35052	5.19739	4.93888	5.01734	5.0236	-0.30618	0.80878	0.000353031	0.00343898	3.45219	-0.046593	0.96822	0.501944	0.716435	-0.297715	0.81354	0.000444936	0.00213403
ENSG00000185100	ADSSL1	1.25496	1.30813	1.25296	1.86504	1.68224	1.94523	1.43752	1.04645	1.15093	1.83395	1.57667	1.52752	0.558688	1.47293	0.000353293	0.00343898	3.45186	-0.0604726	0.95895	0.642859	0.819492	0.374348	1.29625	0.00872111	0.0246819
ENSG00000134283	PPHLN1	5.93603	6.01916	6.06226	5.69465	5.79616	5.75175	5.95339	5.93198	5.93347	5.68492	5.58855	5.66534	-0.258238	0.836108	0.000353343	0.00343898	3.4518	-0.0661234	0.955201	0.267297	0.494507	-0.359478	0.779446	1.00234e-05	9.57556e-05
ENSG00000157514	TSC22D3	2.68213	2.98813	2.72234	3.24793	3.33301	3.18871	3.18032	3.30713	3.072	3.66175	3.50771	3.67885	0.458763	1.37436	0.000353549	0.00343898	3.45155	0.388498	1.30903	0.00160405	0.0129771	0.818004	1.76296	2.81838e-07	5.3146e-06
ENSG00000182600	C2orf82	1.49536	1.45366	1.9056	1.18282	0.432138	0.985942	1.57877	1.7699	1.84713	1.4769	1.35373	1.45992	-0.750859	0.594249	0.000353622	0.00343898	3.45146	0.114189	1.08237	0.499592	0.71488	-0.187663	0.878027	0.275942	0.404313
ENSG00000204576	PRR3	4.61817	4.68762	4.64016	4.10035	4.21283	4.12579	4.44761	4.25875	4.42432	4.00995	3.96196	3.58373	-0.502376	0.705943	0.000353629	0.00343898	3.45145	-0.271811	0.828279	0.0257964	0.101112	-0.795426	0.576173	2.45177e-06	3.05183e-05
ENSG00000253352	TUG1	6.64828	6.55953	6.7098	6.03594	6.18452	6.17072	6.70958	6.8666	6.79488	6.06845	6.05046	6.14813	-0.508725	0.702844	0.000354462	0.00344487	3.45043	0.151347	1.11061	0.191823	0.40347	-0.550205	0.682923	0.000162924	0.000933163
ENSG00000163867	ZMYM6	4.47074	4.38772	4.48956	4.06242	4.04531	3.97427	4.42512	4.59696	4.57321	4.16837	4.21333	4.26046	-0.421719	0.746534	0.000355083	0.00344707	3.44967	0.0826833	1.05899	0.380309	0.608852	-0.235383	0.84946	0.0220359	0.0531139
ENSG00000103150	MLYCD	3.02781	3.12742	2.96734	3.71339	3.56815	3.41515	3.17917	3.15123	3.03708	3.69621	3.59136	3.68494	0.524795	1.43873	0.000355143	0.00344707	3.4496	0.0812722	1.05795	0.513305	0.725162	0.616316	1.53296	6.26079e-05	0.000427374
ENSG00000111679	PTPN6	4.98626	5.09929	4.80175	4.62824	4.44609	4.58109	5.01981	4.97806	5.06854	4.71564	4.65673	4.81103	-0.411135	0.752031	0.000355732	0.00345009	3.44888	0.0592355	1.04191	0.518833	0.729755	-0.235492	0.849395	0.0194136	0.0477464
ENSG00000168209	DDIT4	5.75011	5.76811	5.7477	6.31133	6.23832	6.33078	7.07184	7.01515	6.82441	6.96676	6.99463	7.25955	0.538113	1.45207	0.000355909	0.00345009	3.44866	1.21503	2.32146	9.38147e-09	1.07752e-06	1.31777	2.4928	2.55215e-09	1.51738e-07
ENSG00000130522	JUND	3.6704	3.70767	3.91592	4.14638	4.34833	4.26979	4.37424	4.16727	4.16837	4.89493	5.04091	4.78191	0.490526	1.40496	0.000356369	0.00345234	3.4481	0.472285	1.3873	0.000514698	0.00547013	1.14217	2.20712	4.81473e-09	2.34714e-07
ENSG00000197062	RP5-874C20.3	4.19263	4.21681	4.41244	3.50597	3.69621	4.0052	4.3312	4.46467	4.60042	3.89024	3.73498	4.13601	-0.538368	0.688549	0.000357448	0.00346013	3.44679	0.192069	1.1424	0.114301	0.283185	-0.354116	0.782349	0.00861051	0.0244419
ENSG00000198856	OSTC	6.74955	6.91086	6.80205	6.39453	6.45069	6.4932	7.02233	6.98261	6.75353	6.70633	6.70651	6.76218	-0.374842	0.77119	0.000357629	0.00346013	3.44657	0.0984642	1.07063	0.250964	0.476526	-0.0960207	0.93561	0.265231	0.392041
ENSG00000153250	RBMS1	5.33746	5.24347	5.2056	4.92338	4.99211	4.97536	4.8559	5.0153	5.06096	4.63745	4.62809	4.81361	-0.298706	0.812981	0.000362102	0.00350078	3.44117	-0.284775	0.82087	0.000561709	0.00585297	-0.569802	0.673709	1.98646e-07	3.96795e-06
ENSG00000168778	TCTN2	3.90841	4.05215	3.72442	3.50819	3.4673	3.42448	3.82189	3.91772	3.60897	3.40426	3.47174	3.416	-0.428852	0.742853	0.000362293	0.00350078	3.44094	-0.112915	0.924718	0.249653	0.475442	-0.464916	0.724513	0.000161863	0.00092849
ENSG00000171365	CLCN5	4.69175	4.57069	4.77983	4.04643	4.16805	4.08241	4.61255	4.73361	4.71617	3.74566	3.95606	4.16605	-0.581439	0.668297	0.000363865	0.00351208	3.43906	0.00710532	1.00494	0.955735	1	-0.725706	0.604701	3.90963e-05	0.000290416
ENSG00000123505	AMD1	7.79353	7.768	7.83498	8.06895	8.05914	8.04418	7.67964	7.70205	7.62	7.94798	7.96104	7.99555	0.258655	1.19636	0.000363926	0.00351208	3.43899	-0.13157	0.912838	0.0399761	0.138082	0.169343	1.12455	0.0100445	0.0277385
ENSG00000171490	RSL1D1	8.64658	8.73378	8.63132	8.39569	8.45809	8.47491	8.61775	8.54983	8.54983	8.43349	8.43718	8.46285	-0.227772	0.853953	0.000365403	0.0035241	3.43723	-0.098181	0.93421	0.0725143	0.208139	-0.226167	0.854903	0.000385236	0.0018969
ENSG00000115761	NOL10	6.41156	6.42551	6.4438	6.10369	6.14892	6.15788	6.19732	6.24975	6.15624	6.09322	6.04951	5.80691	-0.29013	0.817828	0.0003679	0.00354592	3.43427	-0.225843	0.855095	0.00302593	0.0210731	-0.443101	0.735552	3.44849e-06	3.99103e-05
ENSG00000163508	EOMES	2.78825	2.77975	2.83351	2.11826	2.40108	2.38726	2.9588	2.7908	2.96734	2.46343	2.31576	2.75262	-0.498424	0.70788	0.000371799	0.00358122	3.42969	0.105262	1.07569	0.346845	0.578509	-0.290775	0.817463	0.0179922	0.0448798
ENSG00000147036	LANCL3	2.67326	2.39558	2.93272	3.1341	3.2668	3.47749	2.46633	2.60561	2.52481	2.78931	3.10741	3.14862	0.626063	1.54335	0.000373076	0.00359124	3.4282	-0.134043	0.911274	0.379702	0.608141	0.347927	1.27273	0.0270174	0.0627178
ENSG00000146574	CCZ1B	5.87506	5.81781	5.84922	5.4478	5.5742	5.66411	5.80567	5.72426	5.77867	5.69136	5.59237	5.62241	-0.285483	0.820467	0.000373884	0.00359674	3.42726	-0.0778095	0.947495	0.240957	0.46614	-0.211863	0.863421	0.00424358	0.0136887
ENSG00000171067	C11orf24	5.505	5.50835	5.36509	5.84297	5.7286	5.77452	5.5507	5.39627	5.48879	5.74404	5.77221	5.66128	0.322358	1.25037	0.000374194	0.00359744	3.4269	0.018852	1.01315	0.80234	0.91666	0.266347	1.20276	0.00198443	0.00734163
ENSG00000140688	C16orf58	5.37254	5.45494	5.17562	5.77036	5.71056	5.65388	5.44747	5.32974	5.3175	5.79701	5.69862	5.61761	0.376887	1.29854	0.000374579	0.00359886	3.42646	0.0300327	1.02104	0.733923	0.877477	0.369965	1.29232	0.000438405	0.00210938
ENSG00000261716	RP11-196G18.22	2.20659	2.25791	2.51913	2.76324	2.93192	2.92835	2.13638	2.36553	2.70348	2.98217	3.14563	3.21043	0.546944	1.46099	0.00037498	0.00360042	3.42599	0.0747188	1.05316	0.565415	0.764561	0.784735	1.72278	5.88677e-06	6.1807e-05
ENSG00000214455	RCN1P2	0.757838	1.18143	0.888176	1.53054	1.65484	1.35533	1.26385	1.14667	0.821241	1.3948	1.29263	1.41667	0.571075	1.48563	0.000376032	0.00360824	3.42478	0.134546	1.09775	0.318249	0.5503	0.425365	1.34291	0.0044133	0.01415
ENSG00000106484	MEST	6.61785	6.67015	6.64331	6.32521	6.43623	6.43036	6.54153	6.5002	6.42819	6.33511	6.33208	6.2834	-0.246586	0.842889	0.000377395	0.00361903	3.4232	-0.153863	0.89884	0.0132709	0.0629339	-0.326811	0.797297	1.92518e-05	0.000162605
ENSG00000100519	PSMC6	6.80493	6.95415	6.95152	6.56821	6.6228	6.70108	6.73099	6.70633	6.73481	6.4932	6.54153	6.44628	-0.272894	0.827658	0.000377817	0.00362079	3.42272	-0.179446	0.883042	0.00969741	0.0499227	-0.409691	0.752785	4.38215e-06	4.82832e-05
ENSG00000165733	BMS1	8.28395	8.20621	8.23581	8.00692	8.02779	8.01181	8.18575	8.12998	8.2654	7.99118	7.91042	7.87042	-0.226477	0.85472	0.000379032	0.00362975	3.42132	-0.0482407	0.967115	0.35848	0.588896	-0.31782	0.802281	9.798e-06	9.378e-05
ENSG00000166987	MBD6	4.37092	4.33681	4.39783	4.80463	4.68167	4.70838	4.80615	4.84704	4.89178	5.15111	5.01007	5.24061	0.363237	1.28631	0.000379372	0.00362975	3.42093	0.479964	1.39471	1.82052e-05	0.000400593	0.765144	1.69954	2.92888e-08	9.4078e-07
ENSG00000135537	LACE1	1.65338	1.97001	1.84398	2.38115	2.37097	2.22431	1.89152	1.75282	1.75536	2.41735	2.10499	2.14549	0.503134	1.41729	0.000379471	0.00362975	3.42082	-0.0226654	0.984412	0.848868	0.944703	0.400602	1.32006	0.00273026	0.00953548
ENSG00000177479	ARIH2	6.73195	6.78435	6.84451	6.5378	6.48393	6.52626	6.80359	6.74995	6.8126	6.49181	6.4821	6.57317	-0.27085	0.828831	0.000381307	0.00364501	3.41873	0.00187955	1.0013	0.975697	1	-0.27133	0.828555	0.000367432	0.00182465
ENSG00000171492	LRRC8D	4.82913	4.84761	4.88805	5.12393	5.18146	5.16212	4.82757	4.70858	4.99734	5.0109	5.03887	5.08475	0.300967	1.23197	0.000382079	0.00364863	3.41785	-0.0102178	0.992943	0.885091	0.964969	0.189808	1.14061	0.0131324	0.0346925
ENSG00000068323	TFE3	4.55351	4.56289	4.46982	4.2646	4.20215	4.13607	4.85803	4.82468	4.88756	4.75977	4.56859	4.63114	-0.327829	0.796735	0.000382238	0.00364863	3.41767	0.327858	1.25515	0.000251365	0.00319521	0.124487	1.09012	0.101795	0.184585
ENSG00000177917	ARL6IP6	5.48907	5.50101	5.60685	5.11128	5.13772	5.14085	5.26475	5.22795	4.87225	4.75473	4.92217	4.63114	-0.402212	0.756697	0.000382407	0.00364863	3.41747	-0.410731	0.752242	0.00031467	0.00380743	-0.762253	0.589575	2.54558e-07	4.88946e-06
ENSG00000205036	C16orf85	0.358613	0.625903	0.279001	-0.451552	0.093622	-0.492	0.127752	0.119056	-0.0255485	-0.134847	-0.470668	-0.132753	-0.704592	0.613616	0.000383107	0.00365301	3.41668	-0.347611	0.785885	0.0431827	0.145568	-0.667498	0.629598	0.000625032	0.00280608
ENSG00000164023	SGMS2	4.56267	4.44795	4.98089	5.2526	5.25996	5.36787	4.60584	4.9365	4.96815	5.19958	5.32919	5.54718	0.630519	1.54812	0.000386204	0.00368023	3.41318	0.174215	1.12835	0.252612	0.478771	0.695004	1.61889	0.000139281	0.000821971
ENSG00000139722	VPS37B	6.41713	6.47078	6.33438	6.1636	6.07328	5.98242	6.77177	6.7753	6.63832	6.49263	6.51257	6.46527	-0.334352	0.79314	0.000387536	0.0036906	3.41169	0.320807	1.24903	0.00043718	0.00485349	0.0826305	1.05895	0.2828	0.412183
ENSG00000137819	PAQR5	5.67848	5.67848	5.70098	5.93044	5.93396	5.88305	5.48769	5.45768	5.52969	5.67573	5.63055	5.57161	0.229913	1.17276	0.000389251	0.0037046	3.40977	-0.194237	0.874035	0.00201469	0.0155761	-0.059767	0.959419	0.274307	0.402514
ENSG00000251634	RP11-1280N14.3	0.865084	0.898257	1.18611	0.00925456	0.053304	0.579976	0.700452	0.10558	0.488434	0.180938	-0.0798402	0.308531	-0.768978	0.586833	0.000389876	0.00370822	3.40907	-0.551495	0.682313	0.00563279	0.0332809	-0.846589	0.556098	0.000151823	0.000883292
ENSG00000165548	TMEM63C	2.5735	2.6756	2.38464	3.08816	3.12332	2.83753	2.82974	2.76085	2.89461	3.39879	3.17961	3.1781	0.471609	1.38666	0.000390857	0.00371522	3.40798	0.283389	1.21705	0.0182594	0.0788061	0.707635	1.63313	3.53409e-06	4.06528e-05
ENSG00000112186	CAP2	3.81919	3.80823	3.87913	3.16711	3.37396	3.41096	3.67103	3.70169	3.60331	3.01552	2.97492	3.08062	-0.518286	0.698201	0.000393139	0.00373457	3.40545	-0.176748	0.884695	0.143508	0.332274	-0.811933	0.569618	3.21088e-06	3.77508e-05
ENSG00000142694	EVA1B	-0.0595653	0.0875969	0.613334	0.986839	1.3341	0.890572	0.113201	0.276139	0.0343666	0.580401	1.38895	0.681319	0.857104	1.8114	0.000394218	0.00374248	3.40426	-0.0722703	0.95114	0.720859	0.870229	0.670203	1.5913	0.00322574	0.0109706
ENSG00000164167	LSM6	5.20311	5.34734	5.33133	4.83307	4.95159	4.83899	4.92526	4.86153	4.69496	4.84761	4.71806	4.45339	-0.419316	0.747779	0.000394825	0.00374589	3.4036	-0.466795	0.72357	0.000141198	0.00203877	-0.619722	0.650796	6.11199e-06	6.36428e-05
ENSG00000168264	IRF2BP2	5.4191	5.42912	5.50553	5.8024	5.82869	5.90065	5.51925	5.59842	5.77955	6.01245	5.88791	5.95323	0.392709	1.31286	0.000395483	0.00374979	3.40287	0.181418	1.134	0.0608517	0.184439	0.500128	1.41434	2.93916e-05	0.000229457
ENSG00000112149	CD83	3.94208	4.01849	3.86636	3.40289	3.74783	3.55358	3.86524	3.87805	3.9419	3.57393	3.65346	3.79539	-0.374573	0.771334	0.000396295	0.00375514	3.40198	-0.0474744	0.967629	0.577017	0.773154	-0.269007	0.82989	0.00538739	0.0166148
ENSG00000128833	MYO5C	6.1567	6.05011	6.21749	6.63611	6.69662	6.71507	5.98981	6.05266	5.96063	6.4211	6.43729	6.47141	0.541307	1.45529	0.00039733	0.0037626	3.40085	-0.140224	0.907378	0.285427	0.513816	0.301929	1.23279	0.0265821	0.0618589
ENSG00000177076	ACER2	2.45195	2.4999	2.4715	1.3727	0.916563	1.73884	4.18496	4.28303	4.2646	3.22349	3.22397	3.69393	-1.13202	0.456275	0.000397602	0.00376283	3.40055	1.76976	3.40998	3.51673e-07	1.78318e-05	0.90441	1.87178	0.00113975	0.00463262
ENSG00000105483	CARD8	4.41076	4.45707	4.67741	4.09471	3.94917	4.15011	4.46253	4.63535	4.57016	4.09867	4.32582	4.24774	-0.450079	0.732003	0.000397971	0.00376396	3.40015	0.0414617	1.02916	0.681324	0.845094	-0.290822	0.817436	0.0104481	0.0286446
ENSG00000182903	ZNF721	5.027	5.01878	5.33248	5.59869	5.5507	5.77625	5.02729	5.32487	5.27074	5.49073	5.53371	5.68609	0.51616	1.43014	0.000398562	0.00376721	3.3995	0.0822255	1.05865	0.503872	0.71797	0.444198	1.36056	0.00151608	0.00587708
ENSG00000134463	ECHDC3	2.4691	2.60195	2.33193	2.97062	2.98918	2.85768	2.24216	2.34835	2.02341	3.0357	3.0725	2.7101	0.47123	1.38629	0.000400496	0.00378313	3.3974	-0.263582	0.833017	0.031219	0.115724	0.472421	1.38744	0.000380291	0.00187927
ENSG00000130413	STK33	2.7845	2.93841	2.77388	2.31447	2.35147	2.34309	2.37705	2.62603	2.6668	2.47526	2.18359	2.08061	-0.496192	0.708976	0.000403594	0.00381002	3.39406	-0.275723	0.826036	0.0245681	0.0977751	-0.58516	0.666575	7.81975e-05	0.000510134
ENSG00000128271	ADORA2A	1.35947	1.77339	1.52131	0.89678	1.02504	1.12588	1.19953	0.87	0.971132	0.561355	0.846251	0.860849	-0.535704	0.689822	0.000406787	0.00383554	3.39063	-0.538004	0.688723	0.000390958	0.00445998	-0.795588	0.576108	5.58102e-06	5.91292e-05
ENSG00000246898	CTD-2258A20.4	1.26796	1.5026	1.30024	0.695901	0.9588	0.736871	0.942007	1.24025	1.36502	1.04998	1.05163	0.972543	-0.559837	0.678379	0.000407021	0.00383554	3.39038	-0.17452	0.886062	0.18692	0.396349	-0.332236	0.794304	0.0181826	0.0452411
ENSG00000172037	LAMB2	5.73048	5.65971	5.56274	6.13746	5.9262	5.99152	5.9144	5.77846	5.7736	6.21973	6.24439	6.31012	0.367323	1.28996	0.000407057	0.00383554	3.39035	0.170943	1.12579	0.0596264	0.182147	0.606748	1.52282	1.15164e-06	1.66921e-05
ENSG00000135083	CCNJL	2.27876	2.39558	2.50286	1.78265	2.15288	1.86439	2.26628	2.25182	2.42408	1.52346	1.70011	1.73431	-0.458836	0.727573	0.000407498	0.00383731	3.38987	-0.0780062	0.947366	0.45853	0.682182	-0.739776	0.598832	2.10613e-06	2.69916e-05
ENSG00000181444	ZNF467	-0.175124	-0.308178	0.0296838	0.510918	0.609634	0.319659	-0.266856	-0.0979291	-0.617766	0.419438	0.153313	0.326641	0.631506	1.54918	0.000408327	0.00384274	3.38899	-0.176223	0.885017	0.245232	0.470808	0.451166	1.36714	0.00624597	0.0188148
ENSG00000050344	NFE2L3	5.6029	5.49347	5.5086	5.81113	5.92493	5.83186	5.23968	5.08236	5.24037	5.64678	5.50395	5.38644	0.320974	1.24917	0.000408597	0.00384289	3.38871	-0.347525	0.785931	0.00026451	0.00331434	-0.0220777	0.984813	0.770419	0.862016
ENSG00000151445	VIPAS39	4.93246	5.08361	4.86598	4.56356	4.65193	4.68986	5.07969	5.05932	5.1705	4.70915	4.68514	4.72162	-0.326038	0.797724	0.000411583	0.00386857	3.38554	0.142208	1.10359	0.0662296	0.195962	-0.255777	0.837536	0.00300274	0.0103207
ENSG00000196313	POM121	6.66072	6.48754	6.4049	6.99578	6.96832	6.7216	6.83949	6.91086	6.92884	7.14448	7.07305	7.05575	0.377566	1.29915	0.000411961	0.00386973	3.38514	0.37521	1.29703	0.000437509	0.00485349	0.573336	1.48796	3.60625e-06	4.12269e-05
[truncated: 13,547 more rows]
