# Supplementary material for: p53-induced RNA-binding protein ZMAT3 inhibits transcription of a hexokinase to suppress mitochondrial respiration in human cancer cells
Source: eLife. 2026 Mar 17;14:RP107538. doi: 10.7554/eLife.107538 (PMC12995290; doi:10.7554/eLife.107538)
Supplement: Supplementary file 4. [file elife-107538-supp4.xlsx]

## Sheet: sip53 vs siCTRL
Supplementary File 4. RNA-seq was performed in biological duplicates of siCTRL and sip53 transfected HCT116 cells. Differentially expressed genes were identified by using p value <0.05 as cut-off.
Row.names	baseMean	log2 Fold change (sip53/siCTRL)	Fold change (sip53/siCTRL)	lfcSE	stat	pvalue	padj	gene_type	gene_status	gene_name	siCTRL-1	siCTRL-2	sip53-1	sip53-2
ENSG00000000003	1405.82	-0.566289	0.675352	0.309802	-1.82791	0.0675635	0.297711	protein_coding	KNOWN	TSPAN6	22.46	34.87	23.54	14.73
ENSG00000000419	1443.31	0.17995	1.13284	0.231016	0.778951	0.436009	0.755741	protein_coding	KNOWN	DPM1	56.29	43.87	51.91	57.65
ENSG00000000457	404.626	0.0288069	1.02017	0.255522	0.112737	0.910239	0.9749	protein_coding	KNOWN	SCYL3	4.77	4.75	5.3	4.26
ENSG00000000460	378.317	-0.163551	0.892825	0.308797	-0.52964	0.596361	0.852069	protein_coding	KNOWN	C1orf112	6.02	7.16	4.56	4.14
ENSG00000000938	0	NA	#VALUE!	NA	NA	NA	NA	protein_coding	KNOWN	FGR	0	0	0	0
ENSG00000000971	2.05877	-1.53638	0.344751	2.42411	-0.633791	0.526218	NA	protein_coding	KNOWN	CFH	0.06	0.02	0.03	0.01
ENSG00000001036	2005.53	0.231167	1.17378	0.204506	1.13037	0.258321	0.600703	protein_coding	KNOWN	FUCA2	39.09	43.2	50.78	41.96
ENSG00000001084	1722.46	0.240193	1.18115	0.196649	1.22143	0.221923	0.55976	protein_coding	KNOWN	GCLC	28.48	17.37	20.89	27.92
ENSG00000001167	1601.31	0.260328	1.19775	0.20073	1.2969	0.194664	0.524272	protein_coding	KNOWN	NFYA	16.16	15.46	19.47	16.79
ENSG00000001460	444.227	0.0648024	1.04594	0.26949	0.240463	0.809971	0.940462	protein_coding	KNOWN	STPG1	6.61	5.38	5.51	6.87
ENSG00000001461	950.173	-0.556349	0.680021	0.211759	-2.62727	0.00860733	0.0803681	protein_coding	KNOWN	NIPAL3	8.77	10.78	6.63	5.79
ENSG00000001497	1682.83	-0.269826	0.829419	0.192357	-1.40274	0.160695	0.478168	protein_coding	KNOWN	LAS1L	26.72	28.25	22.39	22.5
ENSG00000001561	1340.89	-0.0377674	0.974161	0.249348	-0.151464	0.879609	0.965044	protein_coding	KNOWN	ENPP4	9.27	10.75	11.21	7.63
ENSG00000001617	703.61	0.240665	1.18154	0.218128	1.10332	0.269887	0.613041	protein_coding	KNOWN	SEMA3F	8.5	9.6	8.83	10.48
ENSG00000001629	1051.57	-0.66084	0.63251	0.264196	-2.50133	0.0123728	0.102277	protein_coding	KNOWN	ANKIB1	10.97	7.57	6.78	6.37
ENSG00000001630	6673	0.555935	1.47012	0.199188	2.791	0.00525449	0.0564103	protein_coding	KNOWN	CYP51A1	56.03	68.38	99.44	76.69
ENSG00000001631	586.744	0.35663	1.28043	0.240984	1.47989	0.138902	0.445936	protein_coding	KNOWN	KRIT1	8.75	7.57	10.39	11.5
ENSG00000002016	208.5	-0.11108	0.925895	0.313398	-0.354437	0.723011	0.908496	protein_coding	KNOWN	RAD52	6	7.54	6.79	5.94
ENSG00000002079	69.922	-1.1278	0.457612	0.463997	-2.43062	0.0150729	0.117443	pseudogene	KNOWN	MYH16	2.68	1.92	0.69	1.73
ENSG00000002330	761.747	0.248323	1.18783	0.238616	1.04068	0.298025	0.643752	protein_coding	KNOWN	BAD	34.09	32.5	34.05	40.73
ENSG00000002549	3160.45	-0.87691	0.544532	0.181681	-4.82666	1.38843e-06	7.30884e-05	protein_coding	KNOWN	LAP3	69.15	66.96	35.54	36.41
ENSG00000002586	2132.18	0.587989	1.50315	0.305212	1.9265	0.0540425	0.262943	protein_coding	KNOWN	CD99	64.31	46.35	60.95	99.63
ENSG00000002587	3879.42	0.650665	1.56989	0.203377	3.1993	0.0013776	0.0211816	protein_coding	KNOWN	HS3ST1	14.09	15.69	17.86	20.76
ENSG00000002726	20.2363	0.602852	1.51872	0.800287	0.753294	0.451273	NA	protein_coding	KNOWN	AOC1	0.25	0.18	0.33	0.4
ENSG00000002745	660.629	-0.757744	0.59142	0.298959	-2.53461	0.0112572	0.0956618	protein_coding	KNOWN	WNT16	8.18	10.37	6.61	4
ENSG00000002746	117.563	0.00341078	1.00237	0.367121	0.0092906	0.992587	0.998816	protein_coding	KNOWN	HECW1	1.57	2.25	1.19	1.55
ENSG00000002822	728.583	0.239885	1.1809	0.32141	0.746351	0.455455	0.768512	protein_coding	KNOWN	MAD1L1	13.57	8.6	10.8	18.05
ENSG00000002834	12049.3	-0.23689	0.848573	0.174311	-1.35901	0.174144	0.499157	protein_coding	KNOWN	LASP1	118.48	113.68	90.51	99.44
ENSG00000002919	908.883	-0.192144	0.875304	0.305906	-0.628114	0.529929	0.81565	protein_coding	KNOWN	SNX11	11.91	19.24	16.2	10.95
ENSG00000003056	4006.6	0.242051	1.18267	0.184989	1.30846	0.190717	0.52035	protein_coding	KNOWN	M6PR	106.82	60.2	65.47	116.99
ENSG00000003096	287.726	-0.217788	0.859883	0.374862	-0.580981	0.561253	0.833151	protein_coding	KNOWN	KLHL13	2.87	3.81	3.67	1.91
ENSG00000003137	617.03	0.431412	1.34855	0.233633	1.84654	0.0648145	0.291849	protein_coding	KNOWN	CYP26B1	5.15	5.33	7.5	6.22
ENSG00000003147	399.276	-0.389077	0.763618	0.254466	-1.52899	0.126267	0.422244	protein_coding	KNOWN	ICA1	9.58	7.33	6.22	6.59
ENSG00000003249	3217.96	-0.318306	0.802011	0.217008	-1.4668	0.142432	0.45159	protein_coding	KNOWN	DBNDD1	66.82	57.36	43.26	51.95
ENSG00000003393	1392.72	-0.442318	0.735951	0.194555	-2.27348	0.0229972	0.154947	protein_coding	KNOWN	ALS2	13.14	9.75	7.69	7.36
ENSG00000003400	177.172	0.0528836	1.03734	0.347738	0.152079	0.879125	0.964743	protein_coding	KNOWN	CASP10	1.36	1.61	1.86	1.37
ENSG00000003402	382.476	-0.596309	0.661444	0.262546	-2.27126	0.0231313	0.155587	protein_coding	KNOWN	CFLAR	9.45	10.87	7.74	6.67
ENSG00000003436	780.515	-0.279373	0.823949	0.214757	-1.30088	0.193299	0.523086	protein_coding	KNOWN	TFPI	17.48	18.21	12	12.81
ENSG00000003509	287.094	0.37002	1.29237	0.271472	1.36301	0.172878	0.496736	protein_coding	KNOWN	NDUFAF7	5.09	6.46	8.25	5.5
ENSG00000003756	1944.86	-0.3091	0.807145	0.241681	-1.27896	0.200911	0.532469	protein_coding	KNOWN	RBM5	58.98	35.16	24.76	41.9
ENSG00000003987	15.5974	-0.789857	0.578401	1.11191	-0.710364	0.477479	NA	protein_coding	KNOWN	MTMR7	0.17	0.25	0.03	0.17
ENSG00000003989	503.742	-0.0155164	0.989303	0.322847	-0.0480611	0.961668	0.989516	protein_coding	KNOWN	SLC7A2	1.92	2.74	2.81	1.59
ENSG00000004059	6558.03	0.288299	1.2212	0.293683	0.981667	0.326264	0.667752	protein_coding	KNOWN	ARF5	250.67	217	230.85	315.56
ENSG00000004139	2.77452	0.403451	1.32267	1.99583	0.202147	0.839802	NA	protein_coding	KNOWN	SARM1	0.01	0.04	0.01	0.15
ENSG00000004142	3078.07	-0.174801	0.88589	0.205992	-0.848581	0.396114	0.724948	protein_coding	KNOWN	POLDIP2	54.69	52.07	41.59	50.59
ENSG00000004399	1486.31	-0.0361297	0.975268	0.203295	-0.17772	0.858943	0.958808	protein_coding	KNOWN	PLXND1	20.82	23.88	17.65	23.62
ENSG00000004455	8586.33	0.309168	1.23899	0.280094	1.1038	0.26968	0.61298	protein_coding	KNOWN	AK2	297.42	161.57	178.24	339.22
ENSG00000004478	15378	0.214209	1.16007	0.179157	1.19565	0.231832	0.571888	protein_coding	KNOWN	FKBP4	222.62	232.98	246.26	264.66
ENSG00000004487	8022.9	0.0893076	1.06386	0.176067	0.507237	0.611988	0.860141	protein_coding	KNOWN	KDM1A	102.37	109.26	106.35	116.41
ENSG00000004534	2046.94	0.352359	1.27665	0.283033	1.24494	0.213155	0.548589	protein_coding	KNOWN	RBM6	26.56	19.22	24.23	39.28
ENSG00000004660	198.429	0.628073	1.5455	0.308696	2.0346	0.0418912	0.226042	protein_coding	KNOWN	CAMKK1	1.59	1.46	2.2	2.35
ENSG00000004700	945.665	0.150379	1.10986	0.237111	0.634214	0.525941	0.813661	protein_coding	KNOWN	RECQL	11.6	14.75	15.3	11.63
ENSG00000004766	610.741	-0.16332	0.892968	0.227439	-0.718082	0.472707	0.778163	protein_coding	KNOWN	CCDC132	10.42	8.28	5.92	7.55
ENSG00000004777	115.088	0.264929	1.20158	0.45557	0.581534	0.560881	0.833046	protein_coding	KNOWN	ARHGAP33	0.75	1.56	0.81	1.36
ENSG00000004779	2061.87	0.0676643	1.04802	0.296705	0.228052	0.819606	0.944677	protein_coding	KNOWN	NDUFAB1	95.52	156.16	150.57	104.45
ENSG00000004799	110.712	0.713757	1.64007	0.406915	1.75407	0.0794189	0.326906	protein_coding	KNOWN	PDK4	0.84	0.79	1.07	1.51
ENSG00000004809	4.80941	-0.0374931	0.974347	1.60375	-0.0233783	0.981348	NA	protein_coding	KNOWN	SLC22A16	0.12	0.21	0.13	0.2
ENSG00000004838	36.7006	0.157857	1.11563	0.602187	0.26214	0.793213	0.934491	protein_coding	KNOWN	ZMYND10	1.21	1.07	1.45	1.38
ENSG00000004848	28.6297	-0.109469	0.926929	0.69013	-0.15862	0.873968	0.962526	protein_coding	KNOWN	ARX	0.43	0.3	0.33	0.32
ENSG00000004864	328.047	-1.34262	0.394303	0.288669	-4.65107	3.30211e-06	0.000159799	protein_coding	KNOWN	SLC25A13	5.33	5.51	2.58	1.84
ENSG00000004866	813.719	-0.199348	0.870944	0.242946	-0.820545	0.411905	0.737159	protein_coding	KNOWN	ST7	16.58	13.2	11.7	13.78
ENSG00000004897	6513.21	0.425059	1.34263	0.187235	2.27019	0.0231961	0.155895	protein_coding	KNOWN	CDC27	105.32	61.48	79.91	107.47
ENSG00000004948	14.9328	-0.85592	0.552513	0.919616	-0.930736	0.35199	NA	protein_coding	KNOWN	CALCR	0.25	0.2	0.1	0.13
ENSG00000004961	1247.36	-0.129362	0.914236	0.203436	-0.635883	0.524852	0.813059	protein_coding	KNOWN	HCCS	32.04	36.71	33.97	27.92
ENSG00000004975	1648.48	-0.117767	0.921613	0.206818	-0.569424	0.569068	0.838256	protein_coding	KNOWN	DVL2	23.32	22.37	24.65	18.8
ENSG00000005001	217.854	-0.949329	0.517873	0.339053	-2.79994	0.00511114	0.0555062	protein_coding	KNOWN	PRSS22	7.14	9.95	4.64	3.79
ENSG00000005007	4309.62	-0.0509805	0.96528	0.178512	-0.285586	0.775196	0.927376	protein_coding	KNOWN	UPF1	27.96	29.52	27.04	27.07
ENSG00000005020	1002.77	0.148076	1.10809	0.229363	0.645597	0.518541	0.80836	protein_coding	KNOWN	SKAP2	15.49	12.18	14.01	12.8
ENSG00000005022	15952.4	0.277852	1.21239	0.259014	1.07273	0.283392	0.627137	protein_coding	KNOWN	SLC25A5	358.71	522.31	604.21	425.33
ENSG00000005059	450.365	0.496195	1.41049	0.273498	1.81425	0.0696388	0.302557	protein_coding	KNOWN	CCDC109B	6.44	6.42	9.51	6.82
ENSG00000005073	299.305	0.416233	1.33444	0.269308	1.54557	0.122209	0.413723	protein_coding	KNOWN	HOXA11	3.76	4.48	5.59	4.89
ENSG00000005075	2135.06	0.134375	1.09762	0.388023	0.346308	0.729111	0.910943	protein_coding	KNOWN	POLR2J	178.67	65.78	77.75	175.89
ENSG00000005100	1495.45	-0.692904	0.618607	0.271431	-2.55278	0.0106866	0.0923493	protein_coding	KNOWN	DHX33	14.22	12.67	9.31	6.05
ENSG00000005102	5.85393	2.45362	5.47788	1.59594	1.53742	0.124191	NA	protein_coding	KNOWN	MEOX1	0.05	0.02	0.09	0.32
ENSG00000005156	1179.21	0.0887736	1.06347	0.233237	0.380616	0.703488	0.901874	protein_coding	KNOWN	LIG3	19.17	12.77	10.43	16.18
ENSG00000005175	1387.9	0.332734	1.2594	0.268216	1.24055	0.214774	0.550894	protein_coding	KNOWN	RPAP3	29.79	19.39	22.68	34.39
ENSG00000005187	357.762	0.850321	1.8029	0.25606	3.32079	0.000897623	0.015475	protein_coding	KNOWN	ACSM3	6.52	5.68	8.2	12.1
ENSG00000005189	190.407	0.100702	1.07229	0.307689	0.327284	0.743453	0.916647	protein_coding	NOVEL	AC004381.6	2.65	3.08	2.92	2.95
ENSG00000005194	2472.93	-0.275228	0.82632	0.206959	-1.32987	0.183562	0.512073	protein_coding	KNOWN	CIAPIN1	46.59	53.81	44.98	36.93
ENSG00000005206	360.552	-0.511651	0.701419	0.275403	-1.85783	0.0631937	0.287646	processed_transcript	KNOWN	SPPL2B	7.39	7.3	5.51	5.84
ENSG00000005238	696.762	-0.632476	0.645068	0.277344	-2.28048	0.0225793	0.153193	protein_coding	KNOWN	FAM214B	12.43	10.25	5.68	8.65
ENSG00000005249	636.351	0.667047	1.58782	0.243781	2.73625	0.00621435	0.0635347	protein_coding	KNOWN	PRKAR2B	6.09	6.72	9.74	7.46
ENSG00000005302	434.626	-0.16545	0.89165	0.290544	-0.569449	0.569051	0.838256	protein_coding	KNOWN	MSL3	9.09	6.45	6.15	7.92
ENSG00000005339	3349.34	-0.312531	0.805228	0.196534	-1.59021	0.111787	0.394516	protein_coding	KNOWN	CREBBP	14.09	13.46	10.95	12.97
ENSG00000005379	2.14808	-0.0907971	0.939004	2.292	-0.0396148	0.9684	NA	protein_coding	KNOWN	BZRAP1	0.07	0.01	0.03	0.07
ENSG00000005436	239.095	0.0975956	1.06999	0.294324	0.331592	0.740197	0.915423	protein_coding	KNOWN	GCFC2	3.46	5.98	5.32	5.41
ENSG00000005448	670.384	0.493482	1.40784	0.278629	1.77111	0.0765429	0.320202	protein_coding	KNOWN	WDR54	17.79	25.56	31.49	26.82
ENSG00000005469	1.35951	2.1433	4.41771	3.68232	0.582051	0.560532	NA	protein_coding	KNOWN	CROT	0	0.03	0.2	0
ENSG00000005483	2062.67	-0.233986	0.850282	0.29924	-0.781934	0.434254	0.7545	protein_coding	KNOWN	KMT2E	15.92	11.17	10.5	12.62
ENSG00000005486	2163.7	-0.172859	0.887083	0.200079	-0.863953	0.387614	0.72019	protein_coding	KNOWN	RHBDD2	57.57	53.87	42.05	55.16
ENSG00000005513	235.511	0.843027	1.79381	0.294377	2.86376	0.00418639	0.0477179	protein_coding	KNOWN	SOX8	2.03	1.83	3.61	3.07
ENSG00000005700	2230.37	-0.087932	0.94087	0.225587	-0.389792	0.696691	0.898614	protein_coding	KNOWN	IBTK	19.38	13.96	13.86	16.37
ENSG00000005801	916.161	-0.808575	0.570946	0.208644	-3.87539	0.000106456	0.00290166	protein_coding	KNOWN	ZNF195	24.99	23.33	14.28	12.09
ENSG00000005810	2183.66	-0.0334517	0.97708	0.258771	-0.129272	0.897143	0.970843	protein_coding	KNOWN	MYCBP2	9.84	10.68	11.12	8.69
ENSG00000005812	1223.96	0.135837	1.09873	0.221284	0.613857	0.53931	0.821502	protein_coding	KNOWN	FBXL3	14.53	17.06	17.77	15.1
ENSG00000005882	1400.27	-0.198963	0.871177	0.265928	-0.748182	0.45435	0.767903	protein_coding	KNOWN	PDK2	48.58	23.27	21.43	42.25
ENSG00000005884	12129.7	-0.0924807	0.937909	0.227455	-0.406589	0.68431	0.891549	protein_coding	KNOWN	ITGA3	129.38	106.19	94.1	135.8
ENSG00000005889	1020.76	-0.195581	0.873221	0.315793	-0.619332	0.535697	0.819425	protein_coding	KNOWN	ZFX	6.82	9.28	9	4.68
ENSG00000005893	2820.52	0.333225	1.25983	0.263363	1.26527	0.205775	0.538939	protein_coding	KNOWN	LAMP2	38.44	43.99	52.71	36.23
ENSG00000005955	2003.89	0.269648	1.20551	0.191477	1.40825	0.159056	0.475828	protein_coding	KNOWN	GGNBP2	34.35	22.48	30.33	35.62
ENSG00000005961	25.5751	0.961751	1.94767	0.737	1.30495	0.191908	0.522154	protein_coding	KNOWN	ITGA2B	0.23	0.15	0.37	0.6
ENSG00000006007	3045.17	-0.235858	0.84918	0.182422	-1.29293	0.196036	0.5252	protein_coding	KNOWN	GDE1	40.47	50.88	36.51	32.65
ENSG00000006015	292.255	0.0132903	1.00925	0.279015	0.0476328	0.962009	0.98956	protein_coding	KNOWN	C19orf60	13.55	17.86	16.89	20.77
ENSG00000006016	1714.62	-0.0985302	0.933984	0.201414	-0.489194	0.624705	0.865467	protein_coding	KNOWN	CRLF1	61.15	74.07	59.97	59.85
ENSG00000006025	245.529	-0.264588	0.832436	0.304941	-0.86767	0.385575	0.718707	protein_coding	KNOWN	OSBPL7	2.82	3.1	1.98	2.5
ENSG00000006042	661.901	0.069603	1.04943	0.255057	0.272892	0.784937	0.9317	protein_coding	KNOWN	TMEM98	13.76	18.9	17.61	14.52
ENSG00000006047	48.4314	2.22211	4.66575	0.617193	3.60035	0.000317789	0.00700152	protein_coding	KNOWN	YBX2	0.45	0.33	1.37	2.23
ENSG00000006062	270.122	0.543963	1.45797	0.278672	1.95198	0.0509401	0.253532	processed_transcript	KNOWN	MAP3K14	1.81	2.09	2.65	3.14
ENSG00000006114	1174.92	-0.410421	0.752404	0.20862	-1.96731	0.0491478	0.248323	protein_coding	KNOWN	SYNRG	9.42	8.27	7.23	5.8
ENSG00000006118	3974.99	-0.568779	0.674187	0.203158	-2.79969	0.00511518	0.0555063	protein_coding	KNOWN	TMEM132A	83.1	89.34	54.71	59.16
ENSG00000006125	16241.7	-0.517805	0.698433	0.218166	-2.37345	0.017623	0.129907	protein_coding	KNOWN	AP2B1	102.01	129.93	89.86	65.88
ENSG00000006194	982.444	0.13486	1.09799	0.222466	0.606204	0.54438	0.824249	protein_coding	KNOWN	ZNF263	14.8	15.54	14.85	16.82
ENSG00000006282	440.053	-0.547342	0.68428	0.250908	-2.18145	0.0291505	0.18107	protein_coding	KNOWN	SPATA20	7.77	9.05	5.89	5.55
ENSG00000006283	210.547	0.401289	1.32069	0.299523	1.33976	0.180323	0.50839	protein_coding	KNOWN	CACNA1G	1.08	1.06	1.4	1.33
ENSG00000006327	3349	-0.215587	0.861196	0.200267	-1.0765	0.281706	0.625374	protein_coding	KNOWN	TNFRSF12A	148.23	161.82	145.36	114.44
ENSG00000006432	1372.47	-0.213409	0.862497	0.203466	-1.04887	0.294239	0.639277	protein_coding	KNOWN	MAP3K9	4.78	5.23	4.24	4.5
ENSG00000006451	2138.83	-0.165915	0.891363	0.185721	-0.893354	0.371667	0.70678	protein_coding	KNOWN	RALA	35.18	27.87	24.98	33.25
ENSG00000006453	2375.12	0.282583	1.21637	0.209815	1.34682	0.178037	0.504311	protein_coding	KNOWN	BAIAP2L1	31.4	23.82	25.85	36.81
ENSG00000006459	812.998	-0.0502724	0.965754	0.230189	-0.218396	0.827121	0.946798	protein_coding	KNOWN	JHDM1D	4.1	3.88	3.53	3.17
ENSG00000006468	728.032	-0.679874	0.62422	0.224257	-3.03167	0.00243203	0.031897	protein_coding	KNOWN	ETV1	18.3	8.39	4.61	9.01
ENSG00000006530	1162.27	-0.373428	0.771946	0.209948	-1.77866	0.075295	0.318608	protein_coding	KNOWN	AGK	19.63	17.58	15.95	12.93
ENSG00000006534	408.778	-0.645241	0.639386	0.257385	-2.50691	0.0121792	0.101069	protein_coding	KNOWN	ALDH3B1	6.42	6.8	3.71	4.33
ENSG00000006555	8.98103	1.03227	2.04525	1.20592	0.856003	0.391996	NA	protein_coding	KNOWN	TTC22	0.13	0.04	0.09	0.15
ENSG00000006576	1452.48	0.104868	1.0754	0.205319	0.510758	0.609521	0.85921	protein_coding	KNOWN	PHTF2	12.81	12.71	14.88	12.86
ENSG00000006606	24.5378	2.85986	7.25942	0.83039	3.44399	0.000573193	0.0110258	protein_coding	KNOWN	CCL26	0.74	0.4	4.66	3.46
ENSG00000006607	346.572	-0.640138	0.641652	0.267744	-2.39085	0.0168092	0.12598	protein_coding	KNOWN	FARP2	10.99	9.84	9.94	5.04
ENSG00000006611	614.254	0.448923	1.36502	0.271565	1.65309	0.0983116	0.369005	protein_coding	KNOWN	USH1C	11.13	9.17	9.49	17.47
ENSG00000006625	1102.21	-0.166101	0.891248	0.202072	-0.821988	0.411084	0.736916	protein_coding	KNOWN	GGCT	40.8	41.05	34.43	37.27
ENSG00000006634	1927.24	1.03774	2.053	0.230506	4.50199	6.73205e-06	0.000295696	protein_coding	KNOWN	DBF4	25.24	20.34	40.8	39.66
ENSG00000006638	79.683	-0.0789253	0.946763	0.426799	-0.184924	0.853289	0.95729	protein_coding	KNOWN	TBXA2R	1.27	1.33	1.22	1.18
ENSG00000006652	644.619	0.801553	1.74298	0.218918	3.66143	0.000250808	0.00578452	protein_coding	KNOWN	IFRD1	8.37	7.98	13.4	14.09
ENSG00000006695	856.439	0.160677	1.11781	0.21088	0.761938	0.446097	0.762586	protein_coding	KNOWN	COX10	11.83	12.74	13.03	12.59
ENSG00000006704	1066.92	0.342651	1.26808	0.199809	1.71489	0.0863649	0.34317	protein_coding	KNOWN	GTF2IRD1	16.64	15.38	22.97	18.49
ENSG00000006712	3899.13	0.606044	1.52208	0.375324	1.61472	0.10637	0.384148	protein_coding	KNOWN	PAF1	69.57	40.18	52.39	108.08
ENSG00000006715	1688.39	-0.0374189	0.974397	0.208034	-0.179869	0.857256	0.958025	protein_coding	KNOWN	VPS41	25.4	19.45	23.96	27.81
ENSG00000006740	329.891	0.276551	1.2113	0.256906	1.07647	0.281717	0.625374	protein_coding	KNOWN	ARHGAP44	2.46	2.58	3.09	4.52
ENSG00000006744	4480.14	-0.107011	0.92851	0.17809	-0.600881	0.547919	0.826071	protein_coding	KNOWN	ELAC2	66.54	61.06	53.44	62.77
ENSG00000006756	739.463	-0.725449	0.604809	0.236793	-3.06364	0.00218661	0.0293078	protein_coding	KNOWN	ARSD	8.53	8.6	6.02	6.5
ENSG00000006757	413.184	-0.260524	0.834785	0.341908	-0.761971	0.446077	0.762586	protein_coding	KNOWN	PNPLA4	21.57	9.89	11.36	13.92
ENSG00000006831	4893.67	0.348212	1.27298	0.216895	1.60544	0.108397	0.387833	protein_coding	KNOWN	ADIPOR2	33.24	41.53	51.52	40.02
ENSG00000006837	86.2337	1.17313	2.255	0.433286	2.70752	0.00677885	0.0677492	protein_coding	KNOWN	CDKL3	1.9	1.73	4.02	3.95
ENSG00000007047	1668.11	-0.0769659	0.948049	0.22114	-0.348042	0.727809	0.910223	protein_coding	KNOWN	MARK4	17.52	17.21	15.88	16.86
ENSG00000007062	883.787	0.263531	1.20041	0.254935	1.03372	0.301269	0.64617	protein_coding	KNOWN	PROM1	7.03	7.47	9.29	7.65
ENSG00000007080	2160.72	0.325697	1.25327	0.303373	1.07358	0.283009	0.62703	protein_coding	KNOWN	CCDC124	98.41	70.04	76.26	128.03
ENSG00000007168	4242.61	0.203263	1.1513	0.242485	0.838248	0.401892	0.729614	protein_coding	KNOWN	PAFAH1B1	47.53	56.35	76.94	65.74
ENSG00000007174	1.32143	2.11131	4.32083	3.16132	0.667857	0.504225	NA	protein_coding	KNOWN	DNAH9	0	0.01	0.01	0.01
ENSG00000007202	7278.96	-0.687459	0.620947	0.197322	-3.48395	0.000494079	0.00987586	protein_coding	KNOWN	KIAA0100	38.4	49.18	29.19	24.18
ENSG00000007237	312.378	0.430035	1.34727	0.265184	1.62165	0.104879	0.38151	protein_coding	KNOWN	GAS7	1.91	2.01	2.37	2.52
ENSG00000007255	297.588	-0.174031	0.886362	0.27801	-0.62599	0.531321	0.816397	protein_coding	KNOWN	TRAPPC6A	17.66	21.63	17.61	17.13
ENSG00000007312	16.9649	1.50049	2.82939	1.00507	1.49293	0.135457	NA	protein_coding	KNOWN	CD79B	0.1	0.45	0.8	1.33
ENSG00000007314	41.2692	-0.829791	0.562611	0.574414	-1.44459	0.148574	0.462454	protein_coding	KNOWN	SCN4A	0.46	0.33	0.21	0.12
ENSG00000007341	197.276	-0.241247	0.846014	0.350134	-0.689013	0.490815	0.790493	protein_coding	KNOWN	ST7L	7.82	5.48	4.62	6.97
ENSG00000007372	175.562	0.646839	1.56573	0.363012	1.78187	0.0747712	0.317118	protein_coding	KNOWN	PAX6	3.72	2.07	5.07	7.68
ENSG00000007376	1537.71	-0.261557	0.834187	0.260899	-1.00253	0.31609	0.659306	protein_coding	KNOWN	RPUSD1	36.27	29.11	23.57	32.35
ENSG00000007384	210.899	-0.046514	0.968273	0.302792	-0.153617	0.877912	0.964255	protein_coding	KNOWN	RHBDF1	6.09	3.67	4.88	4.78
ENSG00000007392	821.379	0.765125	1.69952	0.229815	3.32931	0.0008706	0.0151799	protein_coding	KNOWN	LUC7L	15.97	17.5	25.21	31.4
ENSG00000007402	799.826	-0.00700203	0.995158	0.242126	-0.0289189	0.976929	0.994227	protein_coding	KNOWN	CACNA2D2	7.15	5.59	4.98	7.2
ENSG00000007516	331.083	0.266029	1.20249	0.314942	0.844693	0.398282	0.726602	protein_coding	KNOWN	BAIAP3	2.5	3.85	4.11	4.45
ENSG00000007520	832.172	0.0924493	1.06618	0.282015	0.327817	0.74305	0.916499	protein_coding	KNOWN	TSR3	25.25	28.46	22.62	32.18
ENSG00000007541	216.94	-0.917201	0.529535	0.315615	-2.90608	0.00365992	0.0431229	protein_coding	KNOWN	PIGQ	3.44	5.09	2.24	2.3
ENSG00000007545	971.469	0.061036	1.04321	0.216606	0.281784	0.778109	0.928909	protein_coding	KNOWN	CRAMP1L	6.38	7.18	6.72	6.44
ENSG00000007866	1118.15	-0.130674	0.913404	0.232143	-0.562904	0.5735	0.840029	protein_coding	KNOWN	TEAD3	15.68	12.71	11.72	14.14
ENSG00000007923	2742.14	-0.223597	0.856428	0.211738	-1.05601	0.290965	0.635794	protein_coding	KNOWN	DNAJC11	47.52	32.12	25.82	40.48
ENSG00000007944	764.855	-0.472542	0.720694	0.262656	-1.79909	0.072004	0.309757	protein_coding	KNOWN	MYLIP	13.38	14.88	11.78	7.83
ENSG00000007968	870.517	-0.284472	0.821042	0.218337	-1.3029	0.192608	0.522686	protein_coding	KNOWN	E2F2	6.07	6.93	5.33	4.68
ENSG00000008018	7009.7	0.357565	1.28126	0.202626	1.76466	0.0776215	0.322748	protein_coding	KNOWN	PSMB1	243.89	303.69	360.08	315.92
ENSG00000008056	23.1029	2.10095	4.28991	0.796046	2.63923	0.00830945	0.0783885	protein_coding	KNOWN	SYN1	0.11	0.08	0.35	0.44
ENSG00000008083	1744.09	-0.192109	0.875325	0.213183	-0.90115	0.367509	0.703482	protein_coding	KNOWN	JARID2	11.28	11.12	8.44	10.19
ENSG00000008086	102.568	-0.508759	0.702827	0.427426	-1.19028	0.233935	0.575123	protein_coding	KNOWN	CDKL5	1.45	1.37	1.2	0.73
ENSG00000008128	1177.19	0.174382	1.12848	0.411732	0.423532	0.671907	0.886705	protein_coding	KNOWN	CDK11A	26.75	15.97	15.62	30.61
ENSG00000008130	1636.04	-0.604577	0.657664	0.219865	-2.74977	0.00596379	0.0618906	protein_coding	KNOWN	NADK	28.94	30.26	21.86	21.5
ENSG00000008256	1172.38	0.438883	1.35555	0.201789	2.17496	0.029633	0.183355	protein_coding	KNOWN	CYTH3	10.59	7.68	10.64	11.03
ENSG00000008277	683.196	-0.0151075	0.989583	0.229002	-0.0659712	0.947401	0.986077	protein_coding	KNOWN	ADAM22	5.28	3.78	4.32	4.11
ENSG00000008282	3926.65	0.218621	1.16362	0.300978	0.726369	0.467613	0.775126	protein_coding	KNOWN	SYPL1	47.62	75.11	85.99	52.23
ENSG00000008283	1974.67	-0.00111636	0.999227	0.19629	-0.00568727	0.995462	0.999198	protein_coding	KNOWN	CYB561	23.45	27.16	25.75	23.47
ENSG00000008294	2862.42	0.439319	1.35596	0.282328	1.55606	0.119694	0.410173	protein_coding	KNOWN	SPAG9	13.17	16.38	21.56	14.1
ENSG00000008300	244.064	-0.234724	0.849848	0.290894	-0.806904	0.419722	0.742249	protein_coding	KNOWN	CELSR3	1.27	1.37	1.19	1.2
ENSG00000008311	80.2633	-0.294741	0.815219	0.425972	-0.691926	0.488984	0.789056	protein_coding	KNOWN	AASS	1.09	1.11	0.88	0.95
ENSG00000008323	997.358	0.237406	1.17887	0.21477	1.10539	0.268989	0.612093	protein_coding	KNOWN	PLEKHG6	12.4	15.75	16.46	17.4
ENSG00000008324	307.565	0.250557	1.18967	0.363723	0.688868	0.490906	0.790493	protein_coding	KNOWN	SS18L2	11	18.44	20.6	13.02
ENSG00000008382	546.556	-0.0455117	0.968946	0.28456	-0.159937	0.87293	0.962156	protein_coding	KNOWN	MPND	12.94	18.65	16.98	14
ENSG00000008394	2653.43	-0.40888	0.753208	0.226532	-1.80495	0.0710819	0.306939	protein_coding	KNOWN	MGST1	200.61	128.02	103.48	147.74
ENSG00000008405	492.437	0.585729	1.5008	0.295709	1.98076	0.0476182	0.244291	protein_coding	KNOWN	CRY1	4.03	5.56	7.72	5.03
ENSG00000008441	1845.96	0.0123184	1.00858	0.266356	0.0462478	0.963113	0.989856	protein_coding	KNOWN	NFIX	18.98	17.86	13.89	19.68
ENSG00000008513	1297.56	0.0961609	1.06893	0.198423	0.484625	0.627942	0.866925	protein_coding	KNOWN	ST3GAL1	10.87	9.7	8.79	8.76
ENSG00000008516	17.2057	-0.0275367	0.981094	0.902441	-0.0305136	0.975657	NA	protein_coding	KNOWN	MMP25	0.11	0.24	0.17	0.29
ENSG00000008517	24.9313	0.620675	1.53759	0.762711	0.813775	0.415774	0.739482	protein_coding	KNOWN	IL32	0.66	1.47	1.43	1.87
ENSG00000008710	811.77	0.145983	1.10648	0.214907	0.679283	0.496959	0.795965	protein_coding	KNOWN	PKD1	8.39	7.08	9.09	8.08
ENSG00000008735	106.11	0.280126	1.2143	0.387326	0.72323	0.469539	0.776717	protein_coding	KNOWN	MAPK8IP2	1.22	1.1	1.5	1.64
ENSG00000008838	2402.46	-0.050429	0.965649	0.193631	-0.260439	0.794525	0.934921	protein_coding	KNOWN	MED24	35.86	42.17	38.13	37.38
ENSG00000008853	792.285	0.170244	1.12525	0.231354	0.735858	0.461817	0.771861	protein_coding	KNOWN	RHOBTB2	5.53	5.45	6.86	6.51
ENSG00000008869	629.851	-0.248061	0.842027	0.24914	-0.995671	0.31941	0.66265	protein_coding	KNOWN	HEATR5B	3.05	3.74	3.16	2.38
ENSG00000008952	3702.77	0.246387	1.18623	0.209249	1.17749	0.239002	0.580422	protein_coding	KNOWN	SEC62	71.57	50.93	59.4	80.73
ENSG00000008988	26695.1	0.135493	1.09847	0.196852	0.688302	0.491262	0.79079	protein_coding	KNOWN	RPS20	2065.6	1765.35	1888.91	2176.94
ENSG00000009307	24690.9	0.120816	1.08735	0.171272	0.705406	0.480558	0.783047	protein_coding	KNOWN	CSDE1	214	235.32	239.36	218.85
ENSG00000009335	6056.12	-0.133411	0.911674	0.235223	-0.567166	0.570601	0.838708	protein_coding	KNOWN	UBE3C	40.35	49.15	45.17	31.34
ENSG00000009413	715.752	-0.411802	0.751684	0.248831	-1.65494	0.0979358	0.368448	protein_coding	KNOWN	REV3L	3.92	3.36	3.71	2.46
ENSG00000009724	4.39141	-0.141071	0.906846	1.64683	-0.0856623	0.931735	NA	protein_coding	KNOWN	MASP2	0.07	0.06	0.03	0.09
ENSG00000009780	240.113	0.341674	1.26723	0.305748	1.1175	0.26378	0.60636	protein_coding	KNOWN	FAM76A	3.86	5.18	4.75	6.09
ENSG00000009790	75.364	0.136968	1.09959	0.569526	0.240494	0.809947	0.940462	protein_coding	KNOWN	TRAF3IP3	1.87	3.2	2.96	2.48
ENSG00000009830	705.507	-0.394964	0.760508	0.213997	-1.84565	0.0649433	0.291849	protein_coding	KNOWN	POMT2	9.52	12.19	9.21	9.73
ENSG00000009844	3580.14	0.00254504	1.00177	0.197844	0.0128638	0.989736	0.998496	protein_coding	KNOWN	VTA1	78.8	57.73	57.59	63.19
ENSG00000009950	373.775	0.32038	1.24866	0.397451	0.806087	0.420193	0.742702	protein_coding	KNOWN	MLXIPL	4.49	3.66	3.03	8.41
ENSG00000009954	6335.96	0.178369	1.1316	0.18854	0.946056	0.34412	0.684073	protein_coding	KNOWN	BAZ1B	35.02	35.34	35.87	41.18
ENSG00000010017	2129.4	0.152562	1.11154	0.194791	0.783213	0.433502	0.75386	protein_coding	KNOWN	RANBP9	33.29	25.78	27.85	28.84
ENSG00000010030	45.0099	-3.17226	0.110932	0.640542	-4.95246	7.32816e-07	4.24664e-05	protein_coding	KNOWN	ETV7	2.08	1.85	0.2	0.29
ENSG00000010072	674.515	-0.332776	0.794007	0.239924	-1.387	0.165441	0.485378	protein_coding	KNOWN	SPRTN	13.09	7.9	9.39	9.68
ENSG00000010165	1679.09	-0.525992	0.694481	0.228831	-2.29861	0.0215273	0.147935	protein_coding	KNOWN	METTL13	25.44	29.77	18.14	15.27
ENSG00000010219	450.391	0.229005	1.17203	0.276647	0.827787	0.407791	0.733964	protein_coding	KNOWN	DYRK4	28.56	21.67	25.45	30.33
ENSG00000010244	6216.31	-0.111689	0.925504	0.193481	-0.577263	0.563762	0.834898	protein_coding	KNOWN	ZNF207	114.26	96.24	93.05	90.51
ENSG00000010256	6320.08	0.398717	1.31833	0.188198	2.11861	0.0341237	0.199845	protein_coding	KNOWN	UQCRC1	151	198.33	231	204.11
ENSG00000010270	1466.9	0.155536	1.11384	0.238028	0.653433	0.513477	0.805125	protein_coding	KNOWN	STARD3NL	34.52	36.75	43.18	32.39
ENSG00000010278	8960.51	0.497675	1.41194	0.172143	2.89106	0.0038395	0.0448386	protein_coding	KNOWN	CD9	269.31	289.17	399.05	355.12
ENSG00000010282	0.25905	-1.36781	0.387478	4.98046	-0.274636	0.783596	NA	protein_coding	KNOWN	HHATL	0	0.07	0	0
ENSG00000010292	10223.4	0.625226	1.54245	0.216407	2.88911	0.00386328	0.044964	protein_coding	KNOWN	NCAPD2	50.96	60.25	95.42	77.38
ENSG00000010295	5.20534	0.420511	1.3384	1.62543	0.258708	0.79586	NA	protein_coding	KNOWN	IFFO1	0.02	0.12	0.15	0.04
ENSG00000010310	14.6825	0.772144	1.70781	0.930146	0.830132	0.406464	NA	protein_coding	KNOWN	GIPR	0.16	0.18	0.19	0.21
ENSG00000010318	73.8063	-0.0657863	0.955424	0.456133	-0.144226	0.885322	0.966698	protein_coding	KNOWN	PHF7	2.44	3.28	3.44	2.65
ENSG00000010319	175.105	-0.419149	0.747865	0.318385	-1.31649	0.18801	0.517469	protein_coding	KNOWN	SEMA3G	1.73	1.69	1.08	1.05
ENSG00000010322	1494.53	-0.535302	0.690014	0.205341	-2.60689	0.00913689	0.0832479	protein_coding	KNOWN	NISCH	14.02	14.8	10.31	11.81
ENSG00000010361	18.4427	-0.163407	0.892914	0.863111	-0.189323	0.84984	NA	protein_coding	KNOWN	FUZ	0.49	0.56	0.32	1.1
ENSG00000010379	2.94427	-0.823146	0.565208	1.93531	-0.425331	0.670596	NA	protein_coding	KNOWN	SLC6A13	0.16	0.1	0.08	0.05
ENSG00000010404	3240.45	-0.443266	0.735468	0.215415	-2.05773	0.0396162	0.218578	protein_coding	KNOWN	IDS	36.38	31.36	24.05	20.38
ENSG00000010438	1077.25	0.71417	1.64054	0.203427	3.51069	0.000446948	0.00907851	protein_coding	KNOWN	PRSS3	38.69	42.7	64.91	61.23
ENSG00000010539	445.266	-0.117204	0.921973	0.247125	-0.474268	0.635309	0.869429	protein_coding	KNOWN	ZNF200	6.9	6.45	6.18	5.29
ENSG00000010610	2.05393	-0.619736	0.65079	2.36962	-0.261534	0.793681	NA	protein_coding	KNOWN	CD4	0.01	0.12	0.04	0.01
ENSG00000010626	207.24	-0.0583864	0.960338	0.313602	-0.18618	0.852304	0.956787	protein_coding	KNOWN	LRRC23	6.96	6.02	6.22	7.11
ENSG00000010704	263.568	-1.18253	0.440578	0.320623	-3.68823	0.000225823	0.0052789	protein_coding	KNOWN	HFE	5.47	5.82	2.6	1.71
ENSG00000010803	541.993	0.453807	1.36965	0.254786	1.78113	0.0748911	0.317522	protein_coding	KNOWN	SCMH1	6.39	5.39	6.98	7.35
ENSG00000010810	585.413	-0.0914887	0.938554	0.244565	-0.374088	0.708339	0.903763	protein_coding	KNOWN	FYN	23.84	12.04	10.44	20.76
ENSG00000010818	847.717	0.464618	1.37995	0.223514	2.07869	0.0376455	0.212474	protein_coding	KNOWN	HIVEP2	2.62	2.38	3.13	3.51
ENSG00000011007	1386.71	0.0940293	1.06735	0.199926	0.470322	0.638125	0.870454	protein_coding	KNOWN	TCEB3	9.28	8.54	9.48	8.9
ENSG00000011009	3545.52	-0.625785	0.648067	0.220195	-2.84196	0.00448376	0.0500324	protein_coding	KNOWN	LYPLA2	99.26	87.65	50.97	65.29
ENSG00000011021	272.12	0.277456	1.21206	0.338467	0.819744	0.412362	0.737159	protein_coding	KNOWN	CLCN6	2.01	1.33	1.82	1.95
ENSG00000011028	755.488	0.833244	1.78169	0.218366	3.81581	0.000135739	0.00350582	protein_coding	KNOWN	MRC2	5.23	5.75	7.69	9.16
ENSG00000011052	16834.9	0.629788	1.54734	0.303433	2.07554	0.0379363	0.213558	protein_coding	KNOWN	NME2	516.62	1039.08	1352.95	856.52
ENSG00000011105	838.449	-0.00775948	0.994636	0.247802	-0.0313132	0.97502	0.993607	protein_coding	KNOWN	TSPAN9	8.45	12.37	10.03	7.17
ENSG00000011114	1568.69	0.410469	1.32912	0.242734	1.69103	0.0908317	0.353675	protein_coding	KNOWN	BTBD7	8.47	6.82	10.39	7.52
ENSG00000011132	367.366	-0.226448	0.854737	0.280316	-0.807832	0.419187	0.742065	protein_coding	KNOWN	APBA3	10.77	8.63	7.66	9.02
ENSG00000011143	564.33	-0.440747	0.736753	0.250026	-1.7628	0.0779339	0.323365	protein_coding	KNOWN	MKS1	12.75	13.16	9.08	8.49
ENSG00000011198	486.097	-0.00117505	0.999186	0.240872	-0.00487833	0.996108	0.999296	protein_coding	KNOWN	ABHD5	9.9	11.98	10.68	10.13
ENSG00000011243	2794.55	0.680202	1.60236	0.267544	2.54239	0.0110096	0.0942813	protein_coding	KNOWN	AKAP8L	46.73	38.66	54.1	79.92
ENSG00000011258	1417.33	0.607533	1.52365	0.253589	2.39574	0.0165868	0.125214	protein_coding	KNOWN	MBTD1	7.19	8.06	13.48	8.8
ENSG00000011260	2589.74	0.0190722	1.01331	0.281916	0.0676522	0.946063	0.985878	protein_coding	KNOWN	UTP18	40.98	63.01	58.44	41.6
ENSG00000011275	2333.33	-0.0437237	0.970148	0.183638	-0.238097	0.811806	0.941351	protein_coding	KNOWN	RNF216	16.02	16.32	15.69	14.96
ENSG00000011295	2047.02	-0.354927	0.781909	0.193071	-1.83832	0.066015	0.294177	protein_coding	KNOWN	TTC19	30.83	34.29	24.69	22.91
ENSG00000011304	12005.9	-0.0417245	0.971493	0.171708	-0.242998	0.808007	0.939702	protein_coding	KNOWN	PTBP1	253.38	228.22	200.31	212.64
ENSG00000011332	222.462	0.316754	1.24552	0.348794	0.908139	0.363805	0.699762	protein_coding	KNOWN	DPF1	4.6	4.26	3.81	8.16
ENSG00000011347	1966.74	0.0675126	1.04791	0.205269	0.328898	0.742233	0.916314	protein_coding	KNOWN	SYT7	16.08	15.51	14.51	14.91
ENSG00000011376	1491.04	-0.435673	0.739349	0.197449	-2.20651	0.0273481	0.173619	protein_coding	KNOWN	LARS2	14.06	13.79	10.05	9.17
ENSG00000011405	1931.91	-0.417471	0.748736	0.228346	-1.82824	0.067514	0.297683	protein_coding	KNOWN	PIK3C2A	13.18	15.51	13.19	8.38
ENSG00000011422	1828.34	0.523115	1.43705	0.193666	2.70112	0.00691057	0.0686676	protein_coding	KNOWN	PLAUR	38.26	38.73	51.44	54.85
ENSG00000011426	8637.78	1.04823	2.06798	0.197474	5.30818	1.10725e-07	8.21032e-06	protein_coding	KNOWN	ANLN	70.34	40.34	81.9	140.65
ENSG00000011451	1507.13	-0.955242	0.515755	0.223194	-4.27988	1.86995e-05	0.000682284	protein_coding	KNOWN	WIZ	18.83	17.18	9.12	9.42
ENSG00000011454	1350.57	0.276224	1.21102	0.195818	1.41061	0.158358	0.47449	protein_coding	KNOWN	RABGAP1	9.93	8.63	10.59	11.01
ENSG00000011478	307.911	0.493193	1.40756	0.275753	1.78853	0.0736902	0.314352	protein_coding	KNOWN	QPCTL	3.81	4.71	6.75	4.99
ENSG00000011485	3075.06	0.0251601	1.01759	0.193895	0.129761	0.896755	0.970771	protein_coding	KNOWN	PPP5C	64.37	49.66	52.75	53.87
ENSG00000011523	751.105	-0.283202	0.821765	0.229929	-1.23169	0.218063	0.554894	protein_coding	KNOWN	CEP68	6.86	6.52	5.93	5.27
ENSG00000011566	819.394	0.385496	1.30631	0.219372	1.75727	0.078872	0.325978	protein_coding	KNOWN	MAP4K3	6.02	6.46	8.63	7.33
ENSG00000011638	1179.88	0.191119	1.14165	0.359277	0.531955	0.594757	0.851364	protein_coding	KNOWN	TMEM159	21.59	37.81	42.95	22.34
ENSG00000012048	854.772	-0.0765751	0.948306	0.214986	-0.356187	0.721701	0.907992	protein_coding	KNOWN	BRCA1	9.69	8.47	8.73	9
ENSG00000012061	3457.78	0.100983	1.0725	0.22039	0.458201	0.646808	0.873644	protein_coding	KNOWN	ERCC1	107.81	94.24	101.48	120.69
ENSG00000012124	142.836	0.450124	1.36616	0.411953	1.09266	0.274544	0.617802	protein_coding	KNOWN	CD22	2.43	1.79	2.1	3.07
ENSG00000012171	248.819	-1.2898	0.409009	0.321624	-4.01025	6.06532e-05	0.0018225	processed_transcript	KNOWN	SEMA3B	4.91	5.83	2.51	2.34
ENSG00000012174	875.745	0.455965	1.3717	0.303087	1.5044	0.132478	0.434722	protein_coding	KNOWN	MBTPS2	5.54	7.31	9.83	5.98
ENSG00000012211	719.312	-0.108893	0.927299	0.281114	-0.387363	0.698488	0.89878	protein_coding	KNOWN	PRICKLE3	10.94	13.22	11.2	10.61
ENSG00000012223	0.275115	1.66144	3.16332	4.99123	0.332872	0.739231	NA	protein_coding	KNOWN	LTF	0	0	0.01	0
ENSG00000012232	4292.09	-0.749919	0.594637	0.23423	-3.20163	0.00136652	0.0210817	protein_coding	KNOWN	EXTL3	25.2	33.71	18.85	13.52
ENSG00000012660	4856.47	0.277861	1.2124	0.19708	1.40989	0.158572	0.474923	protein_coding	KNOWN	ELOVL5	65.68	56.83	82.33	79.36
ENSG00000012779	91.47	-1.32227	0.399906	0.475167	-2.78274	0.00539014	0.0574115	protein_coding	KNOWN	ALOX5	2.68	1.44	0.67	1
ENSG00000012822	842.789	-1.06879	0.476719	0.258103	-4.14094	3.45891e-05	0.00113584	protein_coding	KNOWN	CALCOCO1	22.13	19.26	8.66	9.42
ENSG00000012963	1344.24	-0.15766	0.896478	0.196173	-0.803679	0.421582	0.743442	protein_coding	KNOWN	UBR7	14.06	13.91	12.56	12.19
ENSG00000012983	884.157	0.366873	1.28955	0.231121	1.58736	0.112431	0.395432	protein_coding	KNOWN	MAP4K5	6.82	6.07	7.98	9.43
ENSG00000013275	4191.33	-0.0547247	0.962778	0.184003	-0.297413	0.766152	0.924072	protein_coding	KNOWN	PSMC4	106.2	103.17	91.61	102.6
ENSG00000013288	1732.75	-0.0909221	0.938922	0.210847	-0.431223	0.666307	0.884561	protein_coding	KNOWN	MAN2B2	11.42	10.43	8.94	10.28
ENSG00000013297	5.72921	2.70072	6.50125	2.35479	1.1469	0.251422	NA	protein_coding	KNOWN	CLDN11	0	0.06	0.42	0
ENSG00000013306	7347.2	-0.209172	0.865033	0.183497	-1.13992	0.25432	0.596413	protein_coding	KNOWN	SLC25A39	180.98	204.19	165.99	157.74
ENSG00000013364	5117.04	-0.891083	0.539209	0.193733	-4.59955	4.23402e-06	0.000199985	protein_coding	KNOWN	MVP	96.33	100.91	48.08	57.55
ENSG00000013374	1963.4	0.511073	1.42511	0.258902	1.974	0.0483818	0.246776	protein_coding	KNOWN	NUB1	48.26	23.31	33.17	61.5
ENSG00000013375	1804.08	0.767655	1.7025	0.252449	3.04084	0.00235922	0.0312268	protein_coding	KNOWN	PGM3	12.47	16.93	34.73	17.12
ENSG00000013392	234.171	0.226702	1.17016	0.288864	0.784806	0.432567	0.752899	protein_coding	KNOWN	RWDD2A	6.03	6.09	6.5	7.02
ENSG00000013441	378.955	0.506855	1.42095	0.248561	2.03916	0.0414342	0.224543	protein_coding	KNOWN	CLK1	6.4	6.16	8.85	8.04
ENSG00000013503	738.693	-0.849569	0.55495	0.223641	-3.79881	0.000145391	0.00372029	protein_coding	KNOWN	POLR3B	8.09	7.41	4.43	3.8
ENSG00000013523	1322.03	-0.0604945	0.958935	0.21062	-0.287221	0.773943	0.926539	protein_coding	KNOWN	ANGEL1	12.08	13.37	12.82	9.84
ENSG00000013561	1684.98	-0.0391471	0.97323	0.221942	-0.176385	0.859992	0.95931	protein_coding	KNOWN	RNF14	29.03	30.04	26.89	27.5
ENSG00000013563	599.724	0.158659	1.11625	0.240521	0.659648	0.50948	0.803515	protein_coding	KNOWN	DNASE1L1	9.07	10.6	12.04	10.27
ENSG00000013573	907.66	0.0656157	1.04653	0.235658	0.278437	0.780677	0.930106	protein_coding	KNOWN	DDX11	9.76	14.16	10.56	13.02
ENSG00000013583	954.325	0.213501	1.1595	0.206722	1.03279	0.301701	0.64617	protein_coding	KNOWN	HEBP1	27.8	30.51	32.83	32.55
ENSG00000013588	19967	0.0891301	1.06373	0.172319	0.517238	0.60499	0.856615	protein_coding	KNOWN	GPRC5A	112.9	172.17	208.61	108.21
ENSG00000013619	355.161	-0.202298	0.869165	0.280286	-0.721755	0.470445	0.776717	protein_coding	KNOWN	MAMLD1	3.41	2.96	2.68	2.73
ENSG00000013810	3522.63	0.647887	1.56687	0.206253	3.14123	0.00168242	0.0244251	protein_coding	KNOWN	TACC3	38.82	39.04	52.65	64.26
ENSG00000014123	982.857	0.227264	1.17061	0.204886	1.10922	0.267335	0.609854	protein_coding	KNOWN	UFL1	7.97	7.35	8.57	8.17
ENSG00000014138	861.494	0.000286972	1.0002	0.218401	0.00131397	0.998952	0.9999	protein_coding	KNOWN	POLA2	20.02	15.11	14.31	19.89
ENSG00000014164	925.995	0.00446856	1.0031	0.247785	0.018034	0.985612	0.99718	protein_coding	KNOWN	ZC3H3	10.35	9.76	8.27	10.87
ENSG00000014216	9876.42	-0.484969	0.714512	0.177292	-2.73542	0.00623007	0.0636252	protein_coding	KNOWN	CAPN1	211.77	148.92	97.05	150.32
ENSG00000014257	17.6601	0.416577	1.33476	0.854385	0.487575	0.625851	NA	protein_coding	KNOWN	ACPP	0.34	0.29	0.7	0.44
ENSG00000014641	6216.25	0.144324	1.10521	0.323068	0.44673	0.65507	0.878341	protein_coding	KNOWN	MDH1	126.49	214.03	234.99	126.19
ENSG00000014824	1753.95	0.640456	1.55882	0.190853	3.35576	0.00079147	0.0141398	protein_coding	KNOWN	SLC30A9	16.32	16.57	25.6	23.02
ENSG00000014914	200.972	0.309924	1.23964	0.31103	0.996443	0.319035	0.66257	protein_coding	KNOWN	MTMR11	3.36	2.28	4.27	3.36
ENSG00000014919	2548.17	-0.548808	0.683585	0.210424	-2.60811	0.0091045	0.0832135	protein_coding	KNOWN	COX15	40.75	48.5	33.08	26.86
ENSG00000015133	1224.75	-0.188754	0.877363	0.204861	-0.921374	0.356855	0.694671	protein_coding	KNOWN	CCDC88C	8.33	9.01	6.91	8.15
ENSG00000015153	441.505	0.258199	1.19599	0.248818	1.03771	0.299407	0.645368	protein_coding	KNOWN	YAF2	7.78	8.75	11.16	10.69
ENSG00000015171	1568.76	-0.133178	0.911821	0.210988	-0.631212	0.527902	0.814256	protein_coding	KNOWN	ZMYND11	19.54	14.08	12.04	17.11
ENSG00000015285	13.5572	-1.28405	0.410642	0.999028	-1.2853	0.198688	NA	protein_coding	KNOWN	WAS	0.41	0.45	0.13	0.37
ENSG00000015413	1.75022	-1.1326	0.456093	2.77556	-0.408061	0.683229	NA	protein_coding	KNOWN	DPEP1	0.12	0.2	0.12	0
ENSG00000015475	1419.75	-0.0937502	0.937084	0.258102	-0.363229	0.716434	0.906436	protein_coding	KNOWN	BID	44.56	54.03	48.8	36.61
ENSG00000015479	11578.2	0.0214951	1.01501	0.172253	0.124788	0.900692	0.97193	protein_coding	KNOWN	MATR3	255.38	156.05	158.58	227.63
ENSG00000015520	14.7576	-0.087546	0.941122	0.916599	-0.0955118	0.923908	NA	protein_coding	KNOWN	NPC1L1	0.12	0.1	0.11	0.09
ENSG00000015532	1752.46	-0.0159686	0.988992	0.253064	-0.063101	0.949686	0.986196	protein_coding	KNOWN	XYLT2	18.44	17.41	14.17	20.24
ENSG00000015568	607.375	1.73031	3.31799	0.393956	4.39214	1.12241e-05	0.000448704	protein_coding	KNOWN	RGPD5	3.28	2.93	5.28	3.64
ENSG00000015676	2957.27	-0.155228	0.89799	0.18936	-0.819754	0.412357	0.737159	protein_coding	KNOWN	NUDCD3	29.46	30.81	21.97	28.14
ENSG00000016082	53.1073	-0.0919109	0.938279	0.525065	-0.175047	0.861043	0.959728	protein_coding	KNOWN	ISL1	0.65	0.82	0.61	0.66
ENSG00000016391	353.539	-0.70407	0.613838	0.289965	-2.42812	0.0151774	0.117864	protein_coding	KNOWN	CHDH	4.01	4.37	2.95	2.03
ENSG00000016402	41.9263	0.0848732	1.06059	0.573387	0.148021	0.882326	0.965629	protein_coding	KNOWN	IL20RA	0.52	0.81	0.9	0.6
ENSG00000016864	965.42	0.15856	1.11617	0.204778	0.7743	0.438753	0.757351	protein_coding	KNOWN	GLT8D1	26.88	30.75	31.45	29.06
ENSG00000017260	4416.88	0.3325	1.25919	0.266982	1.2454	0.212984	0.548445	protein_coding	KNOWN	ATP2C1	37.3	46.55	59.67	39.64
ENSG00000017373	237.46	0.392721	1.31287	0.34024	1.15425	0.248399	0.58976	protein_coding	KNOWN	SRCIN1	1.78	1.63	2.2	2.53
ENSG00000017483	1035.8	-0.631553	0.645481	0.219094	-2.88257	0.00394446	0.0457929	protein_coding	KNOWN	SLC38A5	41.18	31.12	18.39	29.15
ENSG00000017621	24.5746	0.368194	1.29074	0.725848	0.507261	0.611972	0.860141	protein_coding	KNOWN	MAGIX	0.75	0.61	0.8	0.87
ENSG00000017797	4129.47	0.282346	1.21617	0.196111	1.43972	0.149946	0.46369	protein_coding	KNOWN	RALBP1	36.18	29.21	33.72	41.75
ENSG00000018189	489.917	0.586617	1.50172	0.233434	2.51299	0.0119713	0.0997632	protein_coding	KNOWN	RUFY3	6.09	5.27	7.74	9.56
ENSG00000018236	341.847	-0.786957	0.579565	0.274118	-2.87087	0.00409339	0.0470873	protein_coding	KNOWN	CNTN1	4.62	3.54	2.47	1.82
ENSG00000018280	7.40353	0.80777	1.7505	1.33216	0.606361	0.544275	NA	protein_coding	KNOWN	SLC11A1	0.3	0.03	0.06	0.11
ENSG00000018408	5560.46	-0.0137452	0.990518	0.181819	-0.0755983	0.939739	0.98426	protein_coding	KNOWN	WWTR1	98.39	65.94	67.72	78.56
ENSG00000018510	1969.62	-0.105068	0.929761	0.237258	-0.442843	0.65788	0.87998	protein_coding	KNOWN	AGPS	8.33	10.14	9.44	6.77
ENSG00000018610	696.175	-0.0299674	0.979442	0.226387	-0.132373	0.89469	0.970596	protein_coding	KNOWN	CXorf56	15.96	13.57	13.7	14.23
ENSG00000018699	879.29	0.408104	1.32694	0.21415	1.90569	0.0566901	0.26987	protein_coding	KNOWN	TTC27	11.61	9.52	12.86	11.72
ENSG00000019144	1600.58	-0.428985	0.742784	0.267681	-1.6026	0.109024	0.389145	protein_coding	KNOWN	PHLDB1	16.09	18.3	10.22	13.54
ENSG00000019186	6906.99	-1.09611	0.467776	0.176915	-6.1957	5.8028e-10	6.89933e-08	protein_coding	KNOWN	CYP24A1	156.89	161.68	76.86	70.94
ENSG00000019485	203.083	-0.088044	0.940797	0.323726	-0.271971	0.785644	0.932207	protein_coding	KNOWN	PRDM11	3.3	4.24	3.63	2.7
ENSG00000019505	123.741	1.05131	2.07242	0.428082	2.45587	0.0140544	0.111306	protein_coding	KNOWN	SYT13	0.43	0.64	1.33	0.82
ENSG00000019549	23.8436	0.170787	1.12567	0.810555	0.210704	0.833118	0.949617	protein_coding	KNOWN	SNAI2	0.54	0.24	0.34	0.49
ENSG00000019582	30.0906	-0.597712	0.660801	0.664157	-0.899956	0.368144	0.703572	protein_coding	KNOWN	CD74	0.96	1.03	0.68	0.56
ENSG00000019995	2704.17	0.390689	1.31102	0.200651	1.9471	0.0515224	0.255152	protein_coding	KNOWN	ZRANB1	15.22	12.89	18.05	17.45
ENSG00000020129	1078.49	-1.02797	0.4904	0.204365	-5.03007	4.90302e-07	2.9659e-05	protein_coding	KNOWN	NCDN	15.39	16.45	7.81	7.02
ENSG00000020181	470.357	-0.154833	0.898236	0.261364	-0.592404	0.55358	0.827998	protein_coding	KNOWN	GPR124	3.26	3.13	2.89	2.93
ENSG00000020256	887.747	0.179587	1.13256	0.254597	0.705377	0.480576	0.783047	protein_coding	KNOWN	ZFP64	14.18	8.89	10.08	15.03
ENSG00000020426	850.522	-0.0799188	0.946111	0.239648	-0.333484	0.738769	0.914966	protein_coding	KNOWN	MNAT1	41.66	32.1	32.3	39.2
ENSG00000020577	407.387	-0.420515	0.747158	0.33494	-1.25549	0.2093	0.543371	protein_coding	KNOWN	SAMD4A	2.94	3.44	2.75	2.13
ENSG00000020633	1541.56	0.226591	1.17007	0.245141	0.924328	0.355316	0.692825	protein_coding	KNOWN	RUNX3	23.25	12.64	13.28	28.02
ENSG00000020922	201.736	0.198885	1.14781	0.30663	0.648617	0.516586	0.807276	protein_coding	KNOWN	MRE11A	2.74	3.42	2.67	3.08
ENSG00000021300	1592.58	-0.888271	0.540261	0.265717	-3.34292	0.000829004	0.014621	protein_coding	KNOWN	PLEKHB1	51.34	40.45	19.71	23.73
ENSG00000021355	2138.14	-0.0431817	0.970512	0.214307	-0.201494	0.840312	0.952934	protein_coding	KNOWN	SERPINB1	46.54	49.14	48.17	42.32
ENSG00000021488	2.23676	-0.782891	0.581201	2.51273	-0.31157	0.755367	NA	protein_coding	KNOWN	SLC7A9	0.1	0.07	0.07	0
ENSG00000021574	1040.6	0.0788928	1.05621	0.27627	0.285565	0.775212	0.927376	protein_coding	KNOWN	SPAST	6.39	7.17	8.61	5.26
ENSG00000021762	906.545	-0.269784	0.829444	0.209037	-1.2906	0.196842	0.526132	protein_coding	KNOWN	OSBPL5	12.09	12.67	7.42	8.67
ENSG00000021776	1299.7	-0.429053	0.742749	0.199348	-2.15229	0.0313747	0.189126	protein_coding	KNOWN	AQR	14.34	10.05	7.3	11.29
ENSG00000021826	2308.77	0.120616	1.0872	0.269631	0.447336	0.654633	0.878341	protein_coding	KNOWN	CPS1	15.92	20.55	22.81	15.93
ENSG00000022267	551.405	0.750153	1.68197	0.299614	2.50373	0.0122892	0.101858	protein_coding	KNOWN	FHL1	5.79	7.36	13.52	8.14
ENSG00000022277	2831.11	0.230483	1.17323	0.190696	1.20864	0.2268	0.565601	protein_coding	KNOWN	RTFDC1	58.42	63.44	72.23	65.02
ENSG00000022556	2530.36	-0.240756	0.846302	0.18866	-1.27614	0.201906	0.53452	protein_coding	KNOWN	NLRP2	28.23	28.78	22.6	25.69
ENSG00000022567	1050.25	-0.308922	0.807245	0.235866	-1.30974	0.190285	0.519787	protein_coding	KNOWN	SLC45A4	10.72	11.09	8.98	7.49
ENSG00000022840	3802.47	-0.139476	0.907849	0.195145	-0.714731	0.474775	0.778943	protein_coding	KNOWN	RNF10	65.73	64.2	59.51	59.69
ENSG00000022976	228.311	-0.311713	0.805684	0.288851	-1.07915	0.280521	0.623762	protein_coding	KNOWN	ZNF839	3.67	4.1	2.9	2.73
ENSG00000023041	2051.5	0.151716	1.11089	0.185396	0.818335	0.413166	0.737558	protein_coding	KNOWN	ZDHHC6	31.98	33.84	37.2	35.25
ENSG00000023171	100.223	-0.0835643	0.943723	0.396296	-0.210864	0.832994	0.949554	protein_coding	KNOWN	GRAMD1B	0.63	0.64	0.45	0.51
ENSG00000023191	3192.62	0.281963	1.21585	0.187901	1.5006	0.13346	0.437008	protein_coding	KNOWN	RNH1	57.59	62.23	67.1	71.83
ENSG00000023228	3142.81	-0.148835	0.901978	0.250432	-0.594313	0.552302	0.827704	protein_coding	KNOWN	NDUFS1	42.46	53.32	44.88	33.89
ENSG00000023287	2166.7	0.107932	1.07768	0.218995	0.492852	0.622117	0.865274	protein_coding	KNOWN	RB1CC1	11.64	12.75	13.61	11.83
ENSG00000023318	1650.62	-0.142666	0.905844	0.235687	-0.60532	0.544966	0.824648	protein_coding	KNOWN	ERP44	13.66	10.8	9.87	11.52
ENSG00000023330	3655.21	0.196077	1.14558	0.192261	1.01985	0.3078	0.651199	protein_coding	KNOWN	ALAS1	73.02	52.94	61.64	81.25
ENSG00000023445	1093.4	0.518115	1.43208	0.213236	2.42978	0.0151082	0.117591	protein_coding	KNOWN	BIRC3	6.92	7.23	10.27	8.46
ENSG00000023516	1813.89	-0.262854	0.833437	0.252097	-1.04267	0.2971	0.642595	protein_coding	KNOWN	AKAP11	5.98	7.47	6.46	4.38
ENSG00000023572	259.553	0.0487908	1.0344	0.308575	0.158117	0.874365	0.962737	protein_coding	KNOWN	GLRX2	13.89	18.94	17.66	14.97
ENSG00000023608	773.016	0.382932	1.30399	0.225737	1.69636	0.0898176	0.351451	protein_coding	KNOWN	SNAPC1	9.66	8.26	11.43	11.16
ENSG00000023697	801.14	0.0236544	1.01653	0.228718	0.103422	0.917628	0.977315	protein_coding	KNOWN	DERA	20.88	24.42	25.87	17.52
ENSG00000023734	8167.56	0.0792651	1.05648	0.175529	0.451579	0.651572	0.875961	protein_coding	KNOWN	STRAP	164.28	154.03	164.32	162.55
ENSG00000023839	1670.99	-0.481583	0.716191	0.251737	-1.91304	0.055743	0.26775	protein_coding	KNOWN	ABCC2	11.43	14.02	10.56	7.08
ENSG00000023892	683.339	0.211362	1.15778	0.26426	0.799825	0.423812	0.745476	protein_coding	KNOWN	DEF6	11.28	10.97	10.24	14.84
ENSG00000023902	312.589	0.590793	1.50607	0.284222	2.07863	0.0376513	0.212474	protein_coding	KNOWN	PLEKHO1	5.58	4.97	5.85	7.26
ENSG00000023909	880.328	0.634379	1.55227	0.251019	2.52721	0.0114972	0.0971029	protein_coding	KNOWN	GCLM	8.14	11.54	18.17	10.53
ENSG00000024048	1798.25	-0.22489	0.85566	0.249452	-0.901537	0.367303	0.703296	protein_coding	KNOWN	UBR2	7.31	9.4	8.14	5.71
ENSG00000024422	4313.08	-0.0807879	0.945541	0.265933	-0.30379	0.761288	0.922057	protein_coding	KNOWN	EHD2	48.62	37.46	32.25	46.31
ENSG00000024526	3234.84	1.05169	2.07296	0.223307	4.70961	2.48185e-06	0.000124021	protein_coding	KNOWN	DEPDC1	23.93	20.26	43.36	37.88
ENSG00000024862	227.618	0.633895	1.55175	0.316721	2.00143	0.0453464	0.238073	protein_coding	KNOWN	CCDC28A	4.33	4.68	7.88	5.63
ENSG00000025039	1150.51	0.566606	1.48104	0.218882	2.58864	0.00963571	0.086352	protein_coding	KNOWN	RRAGD	7.5	11.73	17.06	13.49
ENSG00000025156	1049.77	0.65605	1.57576	0.20272	3.23624	0.00121116	0.0193113	protein_coding	KNOWN	HSF2	11.31	10.97	17.32	16.37
ENSG00000025293	1757.66	0.479624	1.39438	0.239668	2.0012	0.0453704	0.238082	protein_coding	KNOWN	PHF20	8.32	9.54	14.3	9.51
ENSG00000025423	66.5927	1.07755	2.11044	0.467888	2.303	0.0212787	0.146665	protein_coding	KNOWN	HSD17B6	1.29	1.32	2.61	2.48
ENSG00000025434	532.507	-0.2439	0.84446	0.298551	-0.816946	0.413959	0.737925	protein_coding	KNOWN	NR1H3	18.02	16.89	12.02	16.39
ENSG00000025708	460.431	-0.452909	0.730568	0.26016	-1.74088	0.0817039	0.332505	protein_coding	KNOWN	TYMP	12.12	11.7	7.46	9.18
ENSG00000025770	1424.24	0.143602	1.10466	0.269763	0.532329	0.594498	0.85117	protein_coding	KNOWN	NCAPH2	19.64	30.38	28.91	24.77
ENSG00000025772	3193.12	-0.204839	0.867635	0.252697	-0.810611	0.417589	0.740662	protein_coding	KNOWN	TOMM34	64.8	55.51	41.35	59.19
ENSG00000025796	1715.93	0.142689	1.10396	0.258697	0.551567	0.581245	0.844107	protein_coding	KNOWN	SEC63	11.63	8.8	9.47	12.22
ENSG00000025800	4420.29	-0.113621	0.924265	0.234275	-0.484991	0.627683	0.866657	protein_coding	KNOWN	KPNA6	17.91	25.33	22.69	16.36
ENSG00000026025	206.971	-0.180785	0.882223	0.300738	-0.601137	0.547749	0.826071	protein_coding	KNOWN	VIM	4.43	4.97	4.07	3.68
ENSG00000026036	266.744	1.33151	2.51665	0.342704	3.8853	0.000102205	0.00281922	protein_coding	KNOWN	RTEL1-TNFRSF6B	0.72	1.13	2.63	1.93
ENSG00000026103	623.066	-1.42408	0.372658	0.246693	-5.77266	7.80307e-09	7.37123e-07	protein_coding	KNOWN	FAS	14.01	15.64	6.86	4.52
ENSG00000026297	461.249	-0.132064	0.912525	0.251845	-0.524386	0.60001	0.85489	protein_coding	KNOWN	RNASET2	19.21	21.49	17.24	18.93
ENSG00000026508	35294	0.102117	1.07335	0.197212	0.517806	0.604593	0.856615	protein_coding	KNOWN	CD44	579.99	454.87	488.46	688.83
ENSG00000026559	390.557	-0.0565989	0.961528	0.249868	-0.226515	0.820801	0.945431	protein_coding	KNOWN	KCNG1	8.48	7.22	6.66	7.71
ENSG00000026652	551.063	0.142802	1.10405	0.244829	0.583271	0.559711	0.832025	protein_coding	KNOWN	AGPAT4	6.84	7.3	13.06	9.84
ENSG00000026751	10.4585	0.0551223	1.03895	1.07545	0.0512551	0.959122	NA	protein_coding	KNOWN	SLAMF7	0.22	0.25	0.29	0.12
ENSG00000026950	539.353	-0.168857	0.889547	0.240532	-0.702014	0.48267	0.78482	protein_coding	KNOWN	BTN3A1	6.6	6.54	5.71	6.39
ENSG00000027001	596.691	-0.327495	0.796919	0.228168	-1.43532	0.151195	0.465255	protein_coding	KNOWN	MIPEP	9.55	15.41	10.04	7.86
ENSG00000027075	934.414	-0.0639095	0.956668	0.219398	-0.291295	0.770826	0.925224	protein_coding	KNOWN	PRKCH	13.5	11.29	9.41	10.44
ENSG00000027697	1420.72	0.178968	1.13207	0.209045	0.85612	0.391931	0.722276	protein_coding	KNOWN	IFNGR1	25.51	23.19	27.96	23.6
ENSG00000027847	415.022	-0.486874	0.71357	0.261893	-1.85905	0.0630195	0.287232	protein_coding	KNOWN	B4GALT7	11.09	10.18	6.55	8.63
ENSG00000027869	52.895	-0.17368	0.886578	0.542766	-0.31999	0.748976	0.919021	protein_coding	KNOWN	SH2D2A	2.58	1.59	1.47	2.14
ENSG00000028116	763.83	-0.271777	0.828299	0.214322	-1.26808	0.204771	0.537533	protein_coding	KNOWN	VRK2	15.32	17.54	13.35	12.63
ENSG00000028137	21.9274	0.000126797	1.00009	0.859111	0.000147592	0.999882	0.99991	protein_coding	KNOWN	TNFRSF1B	0.11	0.32	0.23	0.17
ENSG00000028203	1501.27	-0.198024	0.871744	0.211371	-0.936855	0.348833	0.688432	protein_coding	KNOWN	VEZT	25.19	20.68	18.22	17.82
ENSG00000028277	13.8695	1.66674	3.17496	1.00203	1.66335	0.0962418	NA	protein_coding	KNOWN	POU2F2	0.07	0.14	0.18	0.71
ENSG00000028310	707.187	-0.822271	0.565551	0.228318	-3.60143	0.000316469	0.00698359	protein_coding	KNOWN	BRD9	15.47	14.6	7.48	8.97
ENSG00000028528	3008.99	0.0347832	1.0244	0.18399	0.189049	0.850054	0.956181	protein_coding	KNOWN	SNX1	46.61	44.97	46.95	47.76
ENSG00000028839	497.884	0.719035	1.64608	0.238656	3.01285	0.00258807	0.0336425	protein_coding	KNOWN	TBPL1	11.66	11.79	21.85	17.28
ENSG00000029153	1064.49	-0.180045	0.882675	0.32475	-0.554412	0.579297	0.84288	protein_coding	KNOWN	ARNTL2	10.49	13.7	13.25	7.39
ENSG00000029363	6144.38	0.0480834	1.03389	0.203269	0.236551	0.813005	0.942084	protein_coding	KNOWN	BCLAF1	104.49	57.53	60.99	108.29
ENSG00000029364	3850.4	-0.110052	0.926555	0.235463	-0.467383	0.640226	0.87147	protein_coding	KNOWN	SLC39A9	36.15	43.62	40.69	28.26
ENSG00000029534	193.435	-1.67899	0.312301	0.320307	-5.24182	1.58998e-07	1.13036e-05	protein_coding	KNOWN	ANK1	2.29	1.86	0.87	1.12
ENSG00000029639	619.641	-0.337007	0.791682	0.226612	-1.48715	0.136974	0.442224	protein_coding	KNOWN	TFB1M	18.74	19.55	17.32	13.79
ENSG00000029725	2284.87	0.267493	1.20371	0.197244	1.35616	0.17505	0.499933	protein_coding	KNOWN	RABEP1	20.29	16.26	20.55	19.18
ENSG00000029993	3877.28	0.580492	1.49536	0.205943	2.8187	0.00482179	0.0530744	protein_coding	KNOWN	HMGB3	74.81	66.1	83.68	111.27
ENSG00000030066	3991.98	-0.176763	0.884686	0.310968	-0.568429	0.569744	0.838401	protein_coding	KNOWN	NUP160	23.92	33.06	31.53	16.79
ENSG00000030110	1237.14	-1.21006	0.43225	0.210071	-5.76025	8.39882e-09	7.88003e-07	protein_coding	KNOWN	BAK1	26.79	31.93	12.79	11.73
ENSG00000030419	43.829	-0.593292	0.662829	0.638304	-0.929481	0.35264	0.690576	protein_coding	KNOWN	IKZF2	0.24	0.41	0.22	0.07
ENSG00000030582	8802.58	-0.0689335	0.953342	0.219068	-0.314667	0.753014	0.919647	protein_coding	KNOWN	GRN	202.43	168.21	150.36	218.94
ENSG00000031003	447.135	-0.688792	0.620373	0.270127	-2.54988	0.0107759	0.0928881	protein_coding	KNOWN	FAM13B	4.07	3.82	2.72	2.01
ENSG00000031081	271.742	-0.248392	0.841834	0.282744	-0.878505	0.37967	0.713309	protein_coding	KNOWN	ARHGAP31	1.14	0.99	1.12	0.83
ENSG00000031691	345.588	0.218969	1.1639	0.300842	0.727853	0.466703	0.774533	protein_coding	KNOWN	CENPQ	5.87	7.88	9.03	6.56
ENSG00000031698	6267.99	0.179354	1.13238	0.244796	0.732668	0.463761	0.773394	protein_coding	KNOWN	SARS	130.37	114.25	111.01	153.27
ENSG00000031823	1970.94	0.0740172	1.05264	0.243789	0.303612	0.761424	0.922057	protein_coding	KNOWN	RANBP3	51.02	33.95	37.2	63.31
ENSG00000032219	425.895	-0.153943	0.89879	0.318563	-0.483243	0.628923	0.867064	protein_coding	KNOWN	ARID4A	6.21	3.68	2.56	5.32
ENSG00000032389	962.25	-0.148393	0.902255	0.230207	-0.644609	0.51918	0.808826	protein_coding	KNOWN	TSSC1	20.6	24.15	21.3	18.09
ENSG00000032444	4861.01	0.0737927	1.05248	0.20531	0.359421	0.71928	0.906958	protein_coding	KNOWN	PNPLA6	90.15	81.24	79.32	91.9
ENSG00000032742	272.753	-0.471875	0.721027	0.276968	-1.70371	0.0884345	0.348122	protein_coding	KNOWN	IFT88	4.18	4.86	3.58	2.69
ENSG00000033011	642.799	-0.871384	0.546622	0.221917	-3.92662	8.61481e-05	0.00245486	protein_coding	KNOWN	ALG1	17.4	17.45	9.18	9.79
ENSG00000033030	659.595	0.298201	1.22961	0.245987	1.21226	0.225412	0.563806	protein_coding	KNOWN	ZCCHC8	8.63	6.76	9.01	9.47
ENSG00000033050	4400.15	-0.457598	0.728198	0.214917	-2.12919	0.0332389	0.196583	protein_coding	KNOWN	ABCF2	59.32	63.67	48.32	35
ENSG00000033100	890.613	-0.191043	0.875972	0.252722	-0.755942	0.449684	0.764479	protein_coding	KNOWN	CHPF2	7.49	9.63	8.53	6.81
ENSG00000033122	4.13701	0.504718	1.41885	1.72492	0.292604	0.769825	NA	protein_coding	KNOWN	LRRC7	0.02	0.05	0.08	0.03
ENSG00000033170	2418.45	0.305968	1.23625	0.190298	1.60784	0.107871	0.387536	protein_coding	KNOWN	FUT8	27.04	28.22	37.03	31.94
ENSG00000033178	2838.74	0.0245596	1.01717	0.275354	0.0891926	0.928929	0.979787	protein_coding	KNOWN	UBA6	26.79	24.93	21.97	23
ENSG00000033327	308.454	-0.367185	0.775294	0.305803	-1.20073	0.229857	0.569666	protein_coding	KNOWN	GAB2	2.06	1.94	1.22	1.68
ENSG00000033627	2151.31	-0.340606	0.78971	0.187308	-1.81843	0.068999	0.300676	protein_coding	KNOWN	ATP6V0A1	36.35	26.65	22.37	27.76
ENSG00000033800	921.307	0.236336	1.178	0.326755	0.723281	0.469507	0.776717	protein_coding	KNOWN	PIAS1	17.94	10.6	13.81	19.86
ENSG00000033867	1376.65	1.12078	2.17465	0.297778	3.76381	0.000167343	0.00413619	protein_coding	KNOWN	SLC4A7	6.08	7.14	18.3	9.4
ENSG00000034063	3165.61	-0.0315984	0.978336	0.195872	-0.161321	0.87184	0.961989	processed_transcript	KNOWN	UHRF1	28.36	30.2	30.49	24.94
ENSG00000034152	3126.77	-0.13256	0.912211	0.240884	-0.550306	0.582109	0.844478	protein_coding	KNOWN	MAP2K3	45.35	62.01	56.09	40.02
ENSG00000034510	58812.9	0.149729	1.10936	0.273634	0.547189	0.584249	0.84598	protein_coding	KNOWN	TMSB10	7140.42	4962.15	5137.85	7773.31
ENSG00000034533	112.272	0.139964	1.10188	0.375484	0.372757	0.70933	0.904166	protein_coding	KNOWN	ASTE1	1.55	1.64	1.79	1.86
ENSG00000034677	1555.04	-0.219966	0.858586	0.197278	-1.115	0.264849	0.607282	protein_coding	KNOWN	RNF19A	25.97	15.4	12.77	20.32
ENSG00000034693	432.764	0.0324773	1.02277	0.241132	0.134687	0.892859	0.969888	protein_coding	KNOWN	PEX3	11.06	9.78	10.32	10.27
ENSG00000034713	2076.18	0.0309006	1.02165	0.263462	0.117287	0.906633	0.973929	protein_coding	KNOWN	GABARAPL2	70.36	96.46	97.11	67.08
ENSG00000035115	428.123	1.26881	2.40964	0.246332	5.15084	2.59319e-07	1.71948e-05	protein_coding	KNOWN	SH3YL1	9.32	7.85	18.89	22.04
ENSG00000035141	2162.97	-0.564756	0.67607	0.192819	-2.92894	0.00340123	0.0409334	protein_coding	KNOWN	FAM136A	54.02	51.34	33.15	35.52
ENSG00000035403	8227.58	0.0262489	1.01836	0.178291	0.147225	0.882954	0.965933	protein_coding	KNOWN	VCL	52.85	53.7	55.53	49.9
ENSG00000035499	879.462	-0.385626	0.765447	0.232905	-1.65572	0.0977784	0.368057	protein_coding	KNOWN	DEPDC1B	21.39	16.46	12.38	12.73
ENSG00000035664	54.0011	0.395713	1.31559	0.512478	0.772156	0.440022	0.758598	protein_coding	KNOWN	DAPK2	0.95	0.55	1.31	1.34
ENSG00000035681	1178.89	-0.258928	0.835709	0.215754	-1.20011	0.230097	0.569952	protein_coding	KNOWN	NSMAF	16.74	11.68	10.53	11.15
ENSG00000035687	1596.76	0.11935	1.08625	0.195588	0.61021	0.541723	0.822665	protein_coding	KNOWN	ADSS	19.12	20.44	22.01	19.25
ENSG00000035862	10196.3	0.561836	1.47615	0.17289	3.24967	0.0011554	0.018616	protein_coding	KNOWN	TIMP2	84.44	83.14	117.83	121.09
ENSG00000035928	2976.04	0.445734	1.36201	0.189504	2.3521	0.0186676	0.134698	protein_coding	KNOWN	RFC1	21.95	19.76	33.17	29.31
ENSG00000036054	869.757	0.521535	1.43548	0.24804	2.10263	0.0354982	0.204593	protein_coding	KNOWN	TBC1D23	6.96	7.73	11.06	7.81
ENSG00000036257	3914.22	0.237833	1.17922	0.203492	1.16876	0.242502	0.584868	protein_coding	KNOWN	CUL3	42.26	54.01	58.68	46.14
ENSG00000036448	88.0224	0.577177	1.49193	0.431003	1.33915	0.180522	0.508729	protein_coding	KNOWN	MYOM2	3.88	3	4.68	4.75
ENSG00000036530	17.167	0.316521	1.24532	0.853306	0.370935	0.710686	NA	protein_coding	KNOWN	CYP46A1	0.19	0.43	0.25	0.26
ENSG00000036549	2040.56	0.170385	1.12536	0.198846	0.85687	0.391517	0.722241	protein_coding	KNOWN	ZZZ3	16.96	18.37	23.1	15.95
ENSG00000036672	314.624	0.312556	1.24191	0.277907	1.12468	0.260724	0.603929	protein_coding	KNOWN	USP2	3.11	3.39	4.08	4.53
ENSG00000037042	323.506	-0.0701955	0.952509	0.329421	-0.213087	0.831259	0.948599	protein_coding	KNOWN	TUBG2	8.18	5.87	5.38	7.57
ENSG00000037241	906.378	0.232419	1.1748	0.204763	1.13506	0.256348	0.598628	protein_coding	KNOWN	RPL26L1	53.67	59.2	62.36	59.28
ENSG00000037474	3032.73	-0.385035	0.76576	0.181214	-2.12476	0.033607	0.197773	protein_coding	KNOWN	NSUN2	41.05	40.65	29.97	31.75
ENSG00000037637	995.903	-0.108685	0.927433	0.234464	-0.463546	0.642973	0.872105	protein_coding	KNOWN	FBXO42	9.27	9.91	11.29	8.21
ENSG00000037749	1228.85	-0.662025	0.63199	0.30365	-2.18023	0.0292407	0.181334	protein_coding	KNOWN	MFAP3	14.14	16.48	14.04	6.21
ENSG00000037757	267.391	-0.267674	0.830658	0.280122	-0.955561	0.339294	0.680948	protein_coding	KNOWN	MRI1	4.81	5.42	4.21	3.78
ENSG00000037897	946.891	-0.0677159	0.954147	0.21369	-0.316889	0.751328	0.919021	protein_coding	KNOWN	METTL1	45.89	35.02	35.82	40.07
ENSG00000037965	23.9386	0.895233	1.85991	0.744889	1.20184	0.229427	0.569298	protein_coding	KNOWN	HOXC8	0.17	0.17	0.27	0.35
ENSG00000038002	80.7432	-0.306736	0.808469	0.425028	-0.721683	0.47049	0.776717	protein_coding	KNOWN	AGA	4.37	2.26	1.45	3.01
ENSG00000038210	788.811	0.313881	1.24305	0.273467	1.14778	0.251058	0.593113	protein_coding	KNOWN	PI4K2B	13.13	10.09	12.45	9.23
ENSG00000038219	867.667	0.372218	1.29434	0.221444	1.68087	0.0927882	0.3575	protein_coding	KNOWN	BOD1L1	4.62	4.31	4.3	4.89
ENSG00000038274	2769	-0.169439	0.889188	0.25784	-0.657147	0.511086	0.804097	protein_coding	KNOWN	MAT2B	44.01	57.4	51.07	36.95
ENSG00000038295	22.8726	0.666006	1.58667	0.74823	0.890109	0.373407	0.70786	protein_coding	KNOWN	TLL1	0.09	0.14	0.37	0.17
ENSG00000038358	2491.03	-0.178243	0.883779	0.185071	-0.963104	0.335495	0.677585	protein_coding	KNOWN	EDC4	34.38	25.19	24.17	33.66
ENSG00000038382	2227.4	-0.189238	0.877069	0.297367	-0.636378	0.52453	0.812754	protein_coding	KNOWN	TRIO	10	13.85	11.67	6.47
ENSG00000038427	7759.12	0.187641	1.1389	0.210385	0.891892	0.372451	0.707457	protein_coding	KNOWN	VCAN	31.36	37.97	46.43	30.82
ENSG00000038532	808.33	-0.410845	0.752183	0.213622	-1.92323	0.0544512	0.26434	protein_coding	KNOWN	CLEC16A	7.21	8.1	6.93	5.28
ENSG00000039068	3208.96	-0.162588	0.893421	0.193626	-0.839703	0.401075	0.728709	protein_coding	KNOWN	CDH1	50.3	36.89	37.26	42.06
ENSG00000039123	3832.11	0.136058	1.0989	0.212121	0.641416	0.521252	0.811046	protein_coding	KNOWN	SKIV2L2	42.8	42.88	40.94	43.92
ENSG00000039139	21.1727	-0.302575	0.810804	0.796986	-0.379649	0.704206	NA	protein_coding	KNOWN	DNAH5	0.22	0.17	0.17	0.27
ENSG00000039319	1217.62	-0.0401044	0.972585	0.239901	-0.16717	0.867236	0.960794	protein_coding	KNOWN	ZFYVE16	6.21	9.28	7.13	5.43
ENSG00000039523	2290.07	-0.0574127	0.960986	0.24507	-0.234271	0.814775	0.942538	protein_coding	KNOWN	FAM65A	23.99	25.49	23.17	24.1
ENSG00000039560	2182.69	0.175174	1.1291	0.183783	0.953155	0.340511	0.681821	protein_coding	KNOWN	RAI14	21.88	18.73	19.14	24.41
ENSG00000039600	15.3707	1.80037	3.4831	0.947084	1.90096	0.0573067	NA	protein_coding	KNOWN	SOX30	0.13	0.12	0.49	0.46
ENSG00000039650	787.187	0.350514	1.27502	0.258017	1.3585	0.174307	0.499452	protein_coding	KNOWN	PNKP	16.46	14.16	17.03	21.58
ENSG00000040199	1099	-0.576911	0.670398	0.25578	-2.2555	0.0241022	0.160124	protein_coding	KNOWN	PHLPP2	5.24	6.95	4.47	3.18
ENSG00000040275	562.89	0.389497	1.30994	0.232632	1.6743	0.094071	0.360898	protein_coding	KNOWN	SPDL1	7.78	8.11	10.41	8.5
ENSG00000040341	1772.92	0.189476	1.14035	0.216198	0.876403	0.380811	0.71448	protein_coding	KNOWN	STAU2	33.54	22.52	25.48	28.85
ENSG00000040487	286.062	-0.246573	0.842896	0.309161	-0.797555	0.425129	0.746547	protein_coding	KNOWN	PQLC2	6.22	7.5	4.77	6.77
ENSG00000040531	389.621	-0.691917	0.619031	0.250531	-2.7618	0.00574828	0.0602434	protein_coding	KNOWN	CTNS	7.25	7.09	5.4	4.82
ENSG00000040608	470.441	0.701207	1.62586	0.245909	2.85149	0.00435154	0.049033	protein_coding	KNOWN	RTN4R	6.83	7.38	10.59	11.8
ENSG00000040633	2805.66	-0.11121	0.925811	0.259036	-0.429322	0.667689	0.885288	protein_coding	KNOWN	PHF23	89.35	53.02	44.18	84.03
ENSG00000040933	947.52	-0.313214	0.804847	0.231009	-1.35585	0.175146	0.499933	protein_coding	KNOWN	INPP4A	6.04	7.61	5.71	4.42
ENSG00000041353	274.573	0.275822	1.21068	0.303165	0.909807	0.362924	0.699438	protein_coding	KNOWN	RAB27B	1.37	1.27	1.78	1.37
ENSG00000041357	5868.21	-0.0499989	0.965937	0.20543	-0.243387	0.807706	0.939606	protein_coding	KNOWN	PSMA4	207.87	178.92	165.48	194.31
ENSG00000041515	10.0297	0.480367	1.3951	1.09364	0.439239	0.660489	NA	protein_coding	KNOWN	MYO16	0.12	0.17	0.1	0.24
ENSG00000041802	1858.01	-0.0372873	0.974486	0.191984	-0.194221	0.846003	0.955069	protein_coding	KNOWN	LSG1	18.29	20.56	19.35	16.98
ENSG00000041880	466.425	-0.420872	0.746973	0.314498	-1.33824	0.180819	0.508848	protein_coding	KNOWN	PARP3	10.48	8.35	6	8.25
ENSG00000041982	15.7608	2.22305	4.6688	0.942959	2.35753	0.0183971	NA	protein_coding	KNOWN	TNC	0.04	0.02	0.2	0.14
ENSG00000041988	591.456	0.439738	1.35636	0.289982	1.51643	0.129411	0.428329	protein_coding	KNOWN	THAP3	16.51	13.47	15.93	23.39
ENSG00000042088	756.606	-0.480125	0.716916	0.219537	-2.18698	0.0287437	0.1793	protein_coding	KNOWN	TDP1	15.2	15.13	9.43	9.39
ENSG00000042286	831.861	-0.558511	0.679002	0.220182	-2.53659	0.0111938	0.0952406	protein_coding	KNOWN	AIFM2	10.07	11.67	7.21	7.24
ENSG00000042317	259.753	-0.177922	0.883975	0.29914	-0.594779	0.551991	0.827507	protein_coding	KNOWN	SPATA7	5.84	4.56	4.51	4.24
ENSG00000042429	1842.24	-0.201588	0.869593	0.191903	-1.05047	0.293503	0.638585	protein_coding	KNOWN	MED17	47.79	41.94	34.71	32.87
ENSG00000042445	3099.17	-0.930045	0.524842	0.200886	-4.62972	3.66162e-06	0.000175962	protein_coding	KNOWN	RETSAT	49.63	51.48	25.2	25.26
ENSG00000042493	3287.58	0.552661	1.46679	0.242607	2.27801	0.0227259	0.153645	protein_coding	KNOWN	CAPG	122.24	97.66	132.92	181.72
ENSG00000042753	2788.44	-0.585834	0.666264	0.29104	-2.0129	0.0441252	0.234157	protein_coding	KNOWN	AP2S1	123.46	207.67	133.14	86.84
ENSG00000042832	2.34808	-0.177087	0.884487	2.57723	-0.0687122	0.945219	NA	protein_coding	KNOWN	TG	0.1	0.12	0.11	0
ENSG00000043039	8.69637	0.992534	1.98968	1.23996	0.800458	0.423446	NA	protein_coding	KNOWN	BARX2	0.17	0.07	0.2	0.26
ENSG00000043093	1951.45	0.185036	1.13685	0.219502	0.842985	0.399237	0.726901	protein_coding	KNOWN	DCUN1D1	30.65	24.55	30.88	23.46
ENSG00000043143	1530.45	-0.145366	0.90415	0.219839	-0.661239	0.508459	0.802698	protein_coding	KNOWN	PHF15	13.41	14.16	15.67	12.96
ENSG00000043355	717.617	0.183203	1.1354	0.247621	0.739853	0.459389	0.770296	protein_coding	KNOWN	ZIC2	8.43	8.34	8	9.65
ENSG00000043514	983.166	0.449664	1.36572	0.228317	1.96947	0.048899	0.247947	protein_coding	KNOWN	TRIT1	17.21	17.19	23.74	21.92
ENSG00000043591	45.2613	1.7148	3.28252	0.575358	2.98041	0.00287861	0.0359944	protein_coding	KNOWN	ADRB1	0.3	0.22	0.83	0.83
ENSG00000044090	1677.28	-0.0904618	0.939222	0.190486	-0.474901	0.634858	0.869429	protein_coding	KNOWN	CUL7	10.67	11.61	10.37	9.76
ENSG00000044115	13129.4	0.15447	1.11301	0.216164	0.714597	0.474858	0.778943	protein_coding	KNOWN	CTNNA1	150.59	133.96	149.14	152.62
ENSG00000044446	653.031	-0.0861465	0.942036	0.234904	-0.366731	0.71382	0.905648	protein_coding	KNOWN	PHKA2	5.11	5.15	7.89	4.64
ENSG00000044459	144.848	-0.0798806	0.946136	0.364008	-0.219447	0.826302	0.946763	protein_coding	KNOWN	CNTLN	1.42	1.47	1.16	1.53
ENSG00000044574	32365.8	0.131641	1.09554	0.178666	0.736797	0.461246	0.771465	protein_coding	KNOWN	HSPA5	278.2	269.7	279.13	299.95
ENSG00000046604	9312.1	-0.211749	0.86349	0.251078	-0.843357	0.399029	0.726901	protein_coding	KNOWN	DSG2	54.07	62.94	60.08	37.81
ENSG00000046647	273.744	-0.0747508	0.949506	0.278377	-0.268524	0.788296	0.933064	protein_coding	KNOWN	GEMIN8	8.63	10.91	8.68	8.36
ENSG00000046651	325.385	0.0796788	1.05678	0.282102	0.282447	0.777601	0.928704	protein_coding	KNOWN	OFD1	3.9	3.44	4.1	4.47
ENSG00000046653	5.35369	0.839946	1.78998	1.50242	0.559062	0.576119	NA	protein_coding	KNOWN	GPM6B	0.02	0.05	0.05	0.08
ENSG00000047056	422.444	-0.0435303	0.970278	0.295399	-0.147361	0.882847	0.965907	protein_coding	KNOWN	WDR37	5.06	4.35	4.27	3.04
ENSG00000047188	991.621	-0.437865	0.738226	0.212723	-2.05838	0.0395536	0.218536	protein_coding	KNOWN	YTHDC2	5.91	6.71	4.7	4.16
ENSG00000047230	853.666	-0.277194	0.825194	0.217305	-1.2756	0.202097	0.53452	protein_coding	KNOWN	CTPS2	8.19	9.09	6.73	7.04
ENSG00000047249	1239.91	-0.0209723	0.985568	0.316087	-0.0663497	0.947099	0.986077	protein_coding	KNOWN	ATP6V1H	17.88	27.96	28.87	16.29
ENSG00000047315	7092.53	0.102305	1.07349	0.21991	0.465212	0.641779	0.872105	protein_coding	KNOWN	POLR2B	58.71	78.63	82.03	59.12
ENSG00000047346	218.561	-0.664978	0.630698	0.29749	-2.23529	0.025398	0.1657	protein_coding	KNOWN	FAM214A	2.67	3.52	2.91	1.65
ENSG00000047365	587.822	-0.425092	0.744791	0.246077	-1.72747	0.0840826	0.338886	protein_coding	KNOWN	ARAP2	3.07	3.23	2.61	1.89
ENSG00000047410	4686.35	0.0190398	1.01328	0.186834	0.101907	0.91883	0.977385	protein_coding	KNOWN	TPR	27.14	26.17	25.01	27.91
ENSG00000047578	965.302	-1.2379	0.423989	0.210629	-5.87716	4.17352e-09	4.3607e-07	protein_coding	KNOWN	KIAA0556	15.31	8.99	3.89	4.02
ENSG00000047579	531.194	0.480337	1.39507	0.309743	1.55076	0.120959	0.41218	protein_coding	KNOWN	DTNBP1	12.25	12.62	12.28	20.24
ENSG00000047597	257.787	-0.379695	0.7686	0.339455	-1.11854	0.263335	0.606229	protein_coding	KNOWN	XK	1.71	2.13	1.77	1.09
ENSG00000047617	0.531189	2.62498	6.16876	4.89227	0.536557	0.591574	NA	protein_coding	KNOWN	ANO2	0	0	0.01	0.01
ENSG00000047621	408.563	-0.30736	0.808119	0.25956	-1.18416	0.23635	0.57754	protein_coding	KNOWN	C12orf4	5.75	5.53	4.53	3.61
ENSG00000047634	286.946	0.585317	1.50037	0.293111	1.99691	0.0458349	0.239271	protein_coding	KNOWN	SCML1	2.94	3.19	5.04	3.75
ENSG00000047644	1079	-0.378328	0.769328	0.206539	-1.83176	0.0669879	0.296216	protein_coding	KNOWN	WWC3	6.59	6.77	5.52	4.97
ENSG00000047662	82.8227	-0.450354	0.731863	0.45852	-0.982191	0.326006	0.667616	protein_coding	KNOWN	FAM184B	0.5	0.48	0.43	0.26
ENSG00000047849	12724.1	0.169654	1.12479	0.212289	0.799166	0.424194	0.745975	protein_coding	KNOWN	MAP4	86.06	81.67	81.63	103.04
ENSG00000047932	1666.68	0.0715324	1.05083	0.191727	0.373095	0.709078	0.903928	protein_coding	KNOWN	GOPC	12.26	12.15	12.99	11.79
ENSG00000048028	1037.42	0.0672502	1.04772	0.292828	0.229658	0.818358	0.944185	protein_coding	KNOWN	USP28	17.17	13.01	15.23	10.83
ENSG00000048052	169.133	0.47462	1.38955	0.339324	1.39872	0.161896	0.480048	protein_coding	KNOWN	HDAC9	1.91	1.48	2.23	1.82
ENSG00000048140	2268.49	-0.115792	0.922875	0.198291	-0.583952	0.559252	0.831972	protein_coding	KNOWN	TSPAN17	38.51	42.3	39.47	34.93
ENSG00000048162	1314.54	-0.258924	0.835711	0.227594	-1.13766	0.255264	0.597378	protein_coding	KNOWN	NOP16	53.81	45.54	36.25	42.36
ENSG00000048342	459.54	-0.681404	0.623558	0.250735	-2.71763	0.0065751	0.0660841	protein_coding	KNOWN	CC2D2A	7.59	7.19	5.15	4.91
ENSG00000048392	4032.72	-1.51901	0.348924	0.230782	-6.58204	4.6405e-11	7.71106e-09	protein_coding	KNOWN	RRM2B	39.52	53.07	19.78	12.02
ENSG00000048405	767.337	0.0917759	1.06568	0.245007	0.374585	0.707969	0.903763	protein_coding	KNOWN	ZNF800	11.82	11.07	10.81	14.45
ENSG00000048471	319.281	-0.716034	0.608769	0.273384	-2.61915	0.0088149	0.0817037	protein_coding	KNOWN	SNX29	1.64	1.92	1.67	0.86
ENSG00000048544	2192.96	-0.239016	0.847323	0.185275	-1.29006	0.197029	0.526274	protein_coding	KNOWN	MRPS10	41.23	40.29	33.65	33.02
ENSG00000048649	1594.46	0.098801	1.07088	0.205689	0.480341	0.630985	0.86788	protein_coding	KNOWN	RSF1	15.03	10.93	10.63	13.46
ENSG00000048707	1680.18	-0.329752	0.795673	0.209921	-1.57084	0.11622	0.40274	protein_coding	KNOWN	VPS13D	8.19	6.29	6.17	6.8
ENSG00000048828	7026.34	-0.300601	0.811914	0.174807	-1.71962	0.0855017	0.341908	protein_coding	KNOWN	FAM120A	63.07	55.37	44.79	42.52
ENSG00000048991	1955.53	-0.480326	0.716815	0.256215	-1.8747	0.0608339	0.281173	protein_coding	KNOWN	R3HDM1	33.99	18.9	15.21	20.93
ENSG00000049089	89.445	-0.419425	0.747723	0.495887	-0.845808	0.39766	0.726266	protein_coding	KNOWN	COL9A2	1.79	2.06	0.93	1.9
ENSG00000049130	32360.1	0.832703	1.78102	0.280434	2.96934	0.00298439	0.0368164	protein_coding	KNOWN	KITLG	186.45	246.32	438.69	254.39
ENSG00000049167	382.629	-0.298089	0.813329	0.344011	-0.866511	0.38621	0.718792	protein_coding	KNOWN	ERCC8	7.49	11.24	9.42	5.1
ENSG00000049192	9.06029	-0.694162	0.618068	1.15628	-0.600339	0.54828	NA	protein_coding	KNOWN	ADAMTS6	0.15	0.08	0.07	0.03
ENSG00000049239	524.752	-0.347971	0.785688	0.295391	-1.178	0.238796	0.58027	protein_coding	KNOWN	H6PD	2.19	2.67	1.96	1.34
ENSG00000049245	3076.23	-0.489789	0.712129	0.192193	-2.54843	0.0108209	0.0932178	protein_coding	KNOWN	VAMP3	63.64	65.66	47.77	46.97
ENSG00000049246	132.595	0.393999	1.31403	0.35877	1.09819	0.27212	0.615258	protein_coding	KNOWN	PER3	0.69	0.61	1.18	0.82
ENSG00000049247	18.2526	0.928211	1.90291	0.90374	1.02708	0.304384	NA	protein_coding	KNOWN	UTS2	0.96	0.36	2.48	0.92
ENSG00000049249	25.8722	0.943003	1.92253	0.752391	1.25334	0.210081	0.544177	protein_coding	KNOWN	TNFRSF9	0.43	0.24	0.72	0.54
ENSG00000049283	597.725	-0.837765	0.559509	0.262992	-3.18552	0.00144495	0.021948	protein_coding	KNOWN	EPN3	15.32	11.9	5.77	7.66
ENSG00000049323	1015.45	0.157806	1.11559	0.214261	0.736514	0.461418	0.771581	protein_coding	KNOWN	LTBP1	5.49	7.32	6.83	6.67
ENSG00000049449	8971.03	0.163325	1.11986	0.213946	0.763392	0.44523	0.762527	protein_coding	KNOWN	RCN1	133.17	108.9	114.72	140.18
ENSG00000049541	1740.92	0.0546537	1.03861	0.18986	0.287863	0.773452	0.926539	protein_coding	KNOWN	RFC2	40.89	39.29	43.28	39.52
ENSG00000049618	1725.87	-0.174235	0.886237	0.195236	-0.892434	0.37216	0.707241	protein_coding	KNOWN	ARID1B	9.23	10.18	8.9	7.25
ENSG00000049656	3967.31	-0.225613	0.855232	0.221023	-1.02077	0.307365	0.651199	protein_coding	KNOWN	CLPTM1L	102.05	102.86	83.57	92.81
ENSG00000049759	2934.88	-0.236826	0.84861	0.183834	-1.28826	0.197654	0.526976	protein_coding	KNOWN	NEDD4L	37.48	29.1	19.79	28.2
ENSG00000049769	50.6626	0.0225126	1.01573	0.525583	0.0428336	0.965834	0.990688	protein_coding	KNOWN	PPP1R3F	1.32	2.03	1.77	1.12
ENSG00000049860	3758.52	0.393355	1.31344	0.181564	2.16648	0.0302747	0.185742	protein_coding	KNOWN	HEXB	80.81	84.02	113.23	98.95
ENSG00000049883	443.316	0.0713669	1.05071	0.246477	0.289548	0.772162	0.925816	protein_coding	KNOWN	PTCD2	8.38	8.91	9.96	8.32
ENSG00000050130	1585.91	0.0450856	1.03174	0.230979	0.195193	0.845242	0.954678	protein_coding	KNOWN	JKAMP	38.35	35.86	44.39	31.73
ENSG00000050165	9.32684	0.816285	1.76087	1.2437	0.656337	0.511607	NA	protein_coding	KNOWN	DKK3	0.17	0.32	0.45	0.26
ENSG00000050327	1838.54	0.225297	1.16902	0.250172	0.900568	0.367818	0.703482	protein_coding	KNOWN	ARHGEF5	12.73	11.55	12.32	14.75
ENSG00000050344	2889.55	-0.104146	0.930356	0.198957	-0.523458	0.600656	0.854975	protein_coding	KNOWN	NFE2L3	30.34	26.08	25.34	25.38
ENSG00000050393	746.999	0.570356	1.48489	0.216489	2.63457	0.00842437	0.0791478	protein_coding	KNOWN	MCUR1	18.81	18.89	28.67	25.3
ENSG00000050405	4256.73	-0.393603	0.761226	0.196253	-2.00559	0.0449005	0.236308	protein_coding	KNOWN	LIMA1	50.54	44.61	35.82	35.18
ENSG00000050426	951.304	0.0411244	1.02892	0.314905	0.130593	0.896097	0.970771	protein_coding	KNOWN	LETMD1	23.21	28.75	31.88	19.9
ENSG00000050438	38.9874	0.565815	1.48022	0.590805	0.957701	0.338214	0.680159	protein_coding	KNOWN	SLC4A8	0.66	0.36	0.54	1.16
ENSG00000050555	491.612	0.24113	1.18192	0.271038	0.889656	0.37365	0.707923	protein_coding	KNOWN	LAMC3	4.41	2.24	3.05	4.92
ENSG00000050748	1853.87	0.347221	1.27211	0.200357	1.73301	0.0830938	0.336474	protein_coding	KNOWN	MAPK9	24.93	20.11	26.49	24.16
ENSG00000050820	1629.37	-0.0684912	0.953635	0.2416	-0.28349	0.776802	0.928339	protein_coding	KNOWN	BCAR1	37.67	16.94	15.16	32.78
ENSG00000051009	764.67	-0.212531	0.863022	0.21114	-1.00659	0.314134	0.657142	protein_coding	KNOWN	FAM160A2	10.77	9.22	8.58	10.62
ENSG00000051108	1480.69	0.696419	1.62048	0.212505	3.27719	0.00104847	0.0173595	protein_coding	KNOWN	HERPUD1	38.54	20.03	33.76	50.33
ENSG00000051128	1234.72	0.337852	1.26387	0.234838	1.43866	0.150247	0.463974	protein_coding	KNOWN	HOMER3	41.15	35.31	39.74	51.15
ENSG00000051180	714.587	0.366167	1.28892	0.220603	1.65985	0.096945	0.366094	protein_coding	KNOWN	RAD51	11.81	12.44	19.24	17.08
ENSG00000051341	586.811	0.261838	1.19901	0.227031	1.15331	0.248782	0.590332	protein_coding	KNOWN	POLQ	2	2.26	2.98	2.86
ENSG00000051382	2401.22	0.108142	1.07784	0.216465	0.499582	0.61737	0.862866	protein_coding	KNOWN	PIK3CB	20.65	25.63	27.47	18.52
ENSG00000051523	2932.42	0.11591	1.08366	0.255512	0.45364	0.650088	0.875246	protein_coding	KNOWN	CYBA	167.33	154.92	136.93	187.22
ENSG00000051596	2440.31	0.237114	1.17863	0.279079	0.849631	0.39553	0.724553	protein_coding	KNOWN	THOC3	69.62	49.43	48.97	80.01
ENSG00000051620	989.611	0.0556413	1.03932	0.223253	0.24923	0.803183	0.938875	protein_coding	KNOWN	HEBP2	36.44	44.15	43.34	37.33
ENSG00000051825	749.486	0.136844	1.0995	0.233051	0.587187	0.557078	0.829868	protein_coding	KNOWN	MPHOSPH9	11.75	13.14	13.42	11.44
ENSG00000052126	658.638	0.216857	1.1622	0.232086	0.934381	0.350107	0.688845	protein_coding	KNOWN	PLEKHA5	6.32	5.26	5.79	6.33
ENSG00000052344	3073.56	0.409088	1.32785	0.206901	1.97722	0.0480172	0.245461	protein_coding	KNOWN	PRSS8	54.05	54.37	62.84	73.38
ENSG00000052723	1590.76	-0.16435	0.892331	0.226374	-0.72601	0.467832	0.775126	protein_coding	KNOWN	SIKE1	31.51	36.07	37.43	34.04
ENSG00000052749	2285.3	-0.627126	0.647465	0.199187	-3.14843	0.00164149	0.0240334	protein_coding	KNOWN	RRP12	24.22	27.4	16.34	16.87
ENSG00000052795	431.08	0.213422	1.15944	0.250331	0.852562	0.393903	0.72357	protein_coding	KNOWN	FNIP2	2.37	2.51	2.69	2.5
ENSG00000052802	3926.57	-0.160096	0.894966	0.222949	-0.718083	0.472706	0.778163	protein_coding	KNOWN	MSMO1	62.83	75.2	70.88	52.9
ENSG00000052841	1486.77	0.327379	1.25473	0.197223	1.65994	0.0969264	0.366094	protein_coding	KNOWN	TTC17	14.32	11.81	16.1	17.75
ENSG00000052850	2.62679	1.2833	2.43395	2.37718	0.539841	0.589306	NA	protein_coding	KNOWN	ALX4	0	0.02	0.02	0.02
ENSG00000053108	12.2487	-0.15177	0.900145	1.00625	-0.150827	0.880113	NA	protein_coding	KNOWN	FSTL4	0.18	0.27	0.11	0.26
ENSG00000053254	1537.82	-0.304248	0.809864	0.198014	-1.5365	0.124417	0.418423	protein_coding	KNOWN	FOXN3	12	10.82	7.94	7.57
ENSG00000053371	1899.37	0.210942	1.15744	0.192993	1.093	0.274393	0.617665	protein_coding	KNOWN	AKR7A2	46.73	53.41	57.28	55.11
ENSG00000053372	2879.81	0.161419	1.11839	0.180695	0.893322	0.371685	0.70678	protein_coding	KNOWN	MRTO4	42.45	43.87	45.68	45.79
ENSG00000053438	1.5883	-1.00924	0.496806	2.9807	-0.338593	0.734916	NA	protein_coding	KNOWN	NNAT	0.14	0	0.03	0.03
ENSG00000053501	353.063	0.107411	1.07729	0.275042	0.390526	0.696148	0.898614	protein_coding	KNOWN	USE1	16.84	21.81	20.24	21.6
ENSG00000053524	30.4126	-0.261937	0.833967	0.65612	-0.399222	0.68973	0.89531	protein_coding	KNOWN	MCF2L2	0.44	0.4	0.5	0.4
ENSG00000053702	6.55722	0.638831	1.55707	1.33608	0.478139	0.632551	NA	protein_coding	KNOWN	NRIP2	0.06	0.07	0.11	0.09
ENSG00000053747	277.727	-1.79213	0.288745	0.301389	-5.94625	2.74363e-09	2.93334e-07	protein_coding	KNOWN	LAMA3	4.58	3.16	0.84	0.86
ENSG00000053770	1079.39	-0.337019	0.791676	0.230775	-1.46038	0.144186	0.454851	protein_coding	KNOWN	AP5M1	13.04	16.52	13.16	10.24
ENSG00000053900	618.858	-0.227915	0.853868	0.258306	-0.882344	0.377591	0.712022	protein_coding	KNOWN	ANAPC4	11.59	12.09	8.73	8.58
ENSG00000053918	341.913	0.285005	1.21841	0.260706	1.0932	0.274304	0.617565	protein_coding	KNOWN	KCNQ1	3.44	3.73	4.89	3.88
ENSG00000054116	1761.09	-0.0227	0.984389	0.2073	-0.109503	0.912803	0.97605	protein_coding	KNOWN	TRAPPC3	89.4	65.08	66.84	96.27
ENSG00000054118	9347.84	0.167659	1.12323	0.275134	0.609372	0.542278	0.823009	protein_coding	KNOWN	THRAP3	77.81	63.15	58.7	95.62
ENSG00000054148	1740.84	-0.643794	0.640028	0.218591	-2.9452	0.00322745	0.0392474	protein_coding	KNOWN	PHPT1	110.54	97.17	57.94	70.3
ENSG00000054179	279.526	0.56191	1.47622	0.283821	1.9798	0.0477255	0.244605	protein_coding	KNOWN	ENTPD2	3.85	5.23	6.52	5.91
ENSG00000054267	1300.62	0.189821	1.14062	0.196724	0.96491	0.33459	0.676897	protein_coding	KNOWN	ARID4B	7.35	7.7	8.45	7.82
ENSG00000054277	504.517	0.680212	1.60238	0.247417	2.74926	0.00597302	0.0619397	protein_coding	KNOWN	OPN3	5.99	8.04	11.38	9.58
ENSG00000054282	503.19	0.00836612	1.00582	0.285178	0.0293365	0.976596	0.993965	protein_coding	KNOWN	SDCCAG8	24.04	20.03	18.76	26.76
ENSG00000054392	166.843	-0.720568	0.606859	0.336291	-2.14269	0.0321378	0.192336	protein_coding	KNOWN	HHAT	2.18	2.99	1.94	1.77
ENSG00000054523	3003.71	-0.258231	0.836113	0.245615	-1.05137	0.293091	0.638293	protein_coding	KNOWN	KIF1B	10.65	13.3	11.35	7.61
ENSG00000054598	1159.79	0.143921	1.1049	0.308123	0.46709	0.640436	0.87147	protein_coding	KNOWN	FOXC1	13.43	8.82	9.67	14.06
ENSG00000054611	701.445	-0.155554	0.897788	0.222726	-0.698411	0.48492	0.786399	protein_coding	KNOWN	TBC1D22A	9.1	8.54	8.19	8.96
ENSG00000054654	1661.92	0.0452903	1.03189	0.200577	0.2258	0.821357	0.945478	protein_coding	KNOWN	SYNE2	7.09	5.65	5.63	8.09
ENSG00000054690	840.221	-1.16	0.447512	0.222339	-5.21725	1.81595e-07	1.26493e-05	protein_coding	KNOWN	PLEKHH1	8.44	11.11	3.82	4.59
ENSG00000054793	1854.3	-0.647604	0.63834	0.242296	-2.67278	0.00752259	0.0730664	protein_coding	KNOWN	ATP9A	8.19	11.08	6.92	5.06
ENSG00000054965	2498.65	-0.473576	0.720177	0.2214	-2.139	0.0324355	0.193323	protein_coding	KNOWN	FAM168A	19.7	17.83	12.14	12.52
ENSG00000054967	308.167	0.286288	1.2195	0.268254	1.06723	0.285869	0.62981	protein_coding	KNOWN	RELT	2.6	3.27	3.48	3.46
ENSG00000055044	3022.67	0.0208926	1.01459	0.250877	0.0832784	0.93363	0.981342	protein_coding	KNOWN	NOP58	65.58	47.71	47.75	64.8
ENSG00000055070	8112.23	-0.143274	0.905462	0.186378	-0.76873	0.442054	0.759916	protein_coding	KNOWN	SZRD1	132.73	100.67	95.81	113.64
ENSG00000055118	483.688	-0.10697	0.928536	0.242944	-0.440308	0.659714	0.880981	protein_coding	KNOWN	KCNH2	5.28	4.72	4.46	4.97
ENSG00000055130	2711.18	0.11994	1.08669	0.183338	0.654201	0.512982	0.804605	protein_coding	KNOWN	CUL1	27.85	29.16	31.33	28.45
ENSG00000055147	658.617	-0.482875	0.71555	0.239396	-2.01706	0.0436893	0.23265	protein_coding	KNOWN	FAM114A2	13.96	13.71	8.64	7.87
ENSG00000055163	3986.65	-1.90434	0.267138	0.209183	-9.10371	8.72938e-20	5.23459e-17	protein_coding	KNOWN	CYFIP2	42.51	44.13	17.62	13.42
ENSG00000055208	4996.2	0.224521	1.16839	0.217672	1.03147	0.302322	0.646311	protein_coding	KNOWN	TAB2	62.63	38.08	43.04	65.17
ENSG00000055211	1222.52	0.100417	1.07208	0.210378	0.477317	0.633136	0.868964	protein_coding	KNOWN	GINM1	19.81	22.8	23.71	20.46
ENSG00000055332	6058.53	-1.24368	0.422294	0.190056	-6.54375	5.99931e-11	9.73442e-09	protein_coding	KNOWN	EIF2AK2	75.71	61.4	24.16	29.48
ENSG00000055483	1951.52	-0.0223332	0.984639	0.221303	-0.100917	0.919617	0.977385	protein_coding	KNOWN	USP36	20.12	20.36	20.65	21.05
ENSG00000055609	1135.45	-0.116922	0.922153	0.231831	-0.504339	0.614023	0.861331	protein_coding	KNOWN	KMT2C	4.84	3.64	3.13	4.33
ENSG00000055732	210.999	0.325613	1.2532	0.348196	0.935143	0.349714	0.688588	protein_coding	KNOWN	MCOLN3	2.4	2.48	3.64	2.29
ENSG00000055813	28.294	-0.257342	0.836628	0.707322	-0.363825	0.715989	0.906411	protein_coding	KNOWN	CCDC85A	0.3	0.28	0.17	0.26
ENSG00000055917	4273.41	0.37951	1.3009	0.228663	1.65969	0.0969768	0.366094	protein_coding	KNOWN	PUM2	24.54	30.5	36.99	28.89
ENSG00000055950	2724.74	0.20739	1.1546	0.208701	0.993721	0.320359	0.663522	protein_coding	KNOWN	MRPL43	116.23	100.21	108.96	130.72
ENSG00000055955	6.17742	-1.84159	0.279013	1.51765	-1.21345	0.224958	NA	protein_coding	KNOWN	ITIH4	0.51	0.43	0.23	0.11
ENSG00000056050	719.38	0.529482	1.44341	0.289608	1.82827	0.0675093	0.297683	protein_coding	KNOWN	C4orf27	29.16	15.91	23.7	32.88
ENSG00000056097	5099.59	0.112358	1.08099	0.201353	0.558015	0.576834	0.841984	protein_coding	KNOWN	ZFR	50.12	34.75	39.76	42.16
ENSG00000056277	472.286	0.353303	1.27748	0.26155	1.35081	0.176758	0.502502	protein_coding	KNOWN	ZNF280C	3.61	3.45	4.39	3.76
ENSG00000056558	26.6172	0.684382	1.60701	0.698744	0.979446	0.32736	0.668087	protein_coding	KNOWN	TRAF1	0.16	0.17	0.22	0.22
ENSG00000056586	2630.88	-0.531229	0.691965	0.278573	-1.90696	0.0565254	0.269864	protein_coding	KNOWN	RC3H2	18.42	37.98	25.15	49.29
ENSG00000056661	1666.16	0.0888258	1.0635	0.288898	0.307464	0.758491	0.920953	protein_coding	KNOWN	PCGF2	33.62	24.96	23.25	37.66
ENSG00000056736	506.075	0.516662	1.43064	0.246153	2.09895	0.0358215	0.205854	protein_coding	KNOWN	IL17RB	8.35	7	12.61	11.48
ENSG00000056972	573.632	-0.0936636	0.93714	0.298154	-0.314145	0.753411	0.919694	protein_coding	KNOWN	TRAF3IP2	11.71	10.03	9.28	10.97
ENSG00000057019	34681.6	-1.16038	0.447395	0.234852	-4.9409	7.77624e-07	4.46875e-05	protein_coding	KNOWN	DCBLD2	366.4	310.05	157.63	109.89
ENSG00000057252	1942.3	-0.210701	0.864117	0.293958	-0.716772	0.473515	0.778672	protein_coding	KNOWN	SOAT1	27.31	30.46	26.82	21.95
ENSG00000057294	1216.38	-0.170861	0.888312	0.22439	-0.761447	0.44639	0.762586	protein_coding	KNOWN	PKP2	12.04	11.19	10.96	8.99
ENSG00000057468	11.4094	1.5415	2.91098	1.11524	1.38222	0.166905	NA	protein_coding	KNOWN	MSH4	0.09	0.03	0.2	0.16
ENSG00000057608	8076.71	-0.00317327	0.997803	0.174926	-0.0181406	0.985527	0.997167	protein_coding	KNOWN	GDI2	147.69	122.44	120.36	143.33
ENSG00000057657	123.848	-1.30951	0.403458	0.370701	-3.53252	0.000411618	0.00849856	protein_coding	KNOWN	PRDM1	2.52	1.25	0.49	0.43
ENSG00000057663	1892.94	0.309771	1.23951	0.213856	1.4485	0.147477	0.46058	protein_coding	KNOWN	ATG5	16.48	20.78	24.12	20.65
ENSG00000057704	516.339	0.319058	1.24752	0.320829	0.99448	0.319989	0.663254	protein_coding	KNOWN	TMCC3	2.5	3.18	4.28	2.29
ENSG00000057757	1221	0.172191	1.12677	0.19606	0.878257	0.379804	0.713465	protein_coding	KNOWN	PITHD1	27.22	29.91	31.89	30.38
ENSG00000057935	1495.83	0.204248	1.15209	0.208354	0.980294	0.326941	0.667995	protein_coding	KNOWN	MTA3	24.38	20.42	25.78	29.23
ENSG00000058056	1460.42	-0.132406	0.912309	0.284406	-0.465553	0.641535	0.872105	protein_coding	KNOWN	USP13	9.32	10.25	10	6.19
ENSG00000058063	1907.94	-0.0267896	0.981602	0.197846	-0.135406	0.892291	0.969755	protein_coding	KNOWN	ATP11B	12.53	16.94	13.3	11.18
ENSG00000058085	2863.05	-0.0659521	0.955315	0.181328	-0.363716	0.71607	0.906411	protein_coding	KNOWN	LAMC2	19.13	20.87	18.56	17.89
ENSG00000058091	598.484	0.344278	1.26952	0.260908	1.31954	0.186989	0.516513	protein_coding	KNOWN	CDK14	4.84	4.66	7.99	5.33
ENSG00000058262	9929.72	-0.621737	0.649888	0.177921	-3.49445	0.000475042	0.00956464	protein_coding	KNOWN	SEC61A1	124.99	123.34	76.59	73.64
ENSG00000058272	1896.4	0.0825239	1.05887	0.212184	0.388925	0.697331	0.898627	protein_coding	KNOWN	PPP1R12A	35.46	13.81	15.6	37.91
ENSG00000058335	74.3876	-0.515169	0.699711	0.456068	-1.12959	0.25865	0.601264	protein_coding	KNOWN	RASGRF1	0.83	1.24	1.03	0.82
ENSG00000058404	6.18983	0.336624	1.2628	1.38171	0.243628	0.807519	NA	protein_coding	KNOWN	CAMK2B	0.05	0.04	0.15	0.06
ENSG00000058453	305.031	-0.0447228	0.969476	0.320656	-0.139473	0.889077	0.968574	protein_coding	KNOWN	CROCC	3.06	2.34	2.04	3.8
ENSG00000058600	1351.44	0.026458	1.01851	0.193851	0.136487	0.891437	0.96946	protein_coding	KNOWN	POLR3E	34.8	24.63	22.44	30.59
ENSG00000058668	3487.87	-0.135926	0.910086	0.178478	-0.761583	0.446309	0.762586	protein_coding	KNOWN	ATP2B4	17.62	16.76	16.04	15.1
ENSG00000058673	4495.89	0.256452	1.19454	0.177722	1.443	0.149022	0.46322	protein_coding	KNOWN	ZC3H11A	31.61	33.63	40.7	35.53
ENSG00000058729	892.309	-0.0246649	0.983049	0.209047	-0.117987	0.906078	0.973921	protein_coding	KNOWN	RIOK2	14.83	15.45	14.36	12.62
ENSG00000058799	1098.02	0.120224	1.0869	0.221564	0.542616	0.587394	0.847766	protein_coding	KNOWN	YIPF1	33.39	25.64	24.82	31.39
ENSG00000058804	2885.11	-0.43358	0.740422	0.237979	-1.82193	0.0684659	0.299864	protein_coding	KNOWN	NDC1	34.16	31.27	23.8	17.77
ENSG00000058866	288.366	-0.247789	0.842186	0.266575	-0.929528	0.352616	0.690576	protein_coding	KNOWN	DGKG	5.12	5.04	4.01	4.77
ENSG00000059122	1125.03	-0.0839418	0.943476	0.21188	-0.396175	0.691976	0.896161	protein_coding	KNOWN	FLYWCH1	18.68	15.46	13.5	18.41
ENSG00000059145	412.665	0.187105	1.13848	0.245773	0.761293	0.446482	0.762586	protein_coding	KNOWN	UNKL	6.53	4.45	5.99	5.07
ENSG00000059377	12.1814	0.608578	1.52476	1.02777	0.592134	0.553761	NA	protein_coding	KNOWN	TBXAS1	0.46	0.27	0.87	1.17
ENSG00000059378	1423.88	-1.79215	0.288742	0.199584	-8.97939	2.72274e-19	1.50208e-16	protein_coding	KNOWN	PARP12	36.45	30.52	9.23	10.24
ENSG00000059573	5104.8	-0.396695	0.759596	0.180673	-2.19565	0.028117	0.176573	protein_coding	KNOWN	ALDH18A1	57.6	65.71	46.87	43.94
ENSG00000059588	112.246	-1.35633	0.390575	0.431166	-3.14572	0.00165678	0.0241803	protein_coding	KNOWN	TARBP1	2.28	2.24	0.84	0.53
ENSG00000059691	710.188	0.294527	1.22648	0.242078	1.21666	0.223734	0.5617	protein_coding	KNOWN	PET112	12.28	9.21	12.07	13.74
ENSG00000059728	325.886	0.120555	1.08715	0.27099	0.444867	0.656416	0.879124	protein_coding	KNOWN	MXD1	2.06	2.51	3.29	1.89
ENSG00000059758	826.334	0.109739	1.07903	0.223763	0.490424	0.623834	0.865467	protein_coding	KNOWN	CDK17	8.53	8.52	9.18	9.86
ENSG00000059769	498.144	1.12543	2.18167	0.497325	2.26297	0.0236375	0.158026	protein_coding	KNOWN	DNAJC25	10.81	2.01	12.84	16.52
ENSG00000059804	945.653	-0.544417	0.685668	0.275376	-1.977	0.0480421	0.245497	protein_coding	KNOWN	SLC2A3	9.26	11.71	9.63	5.06
ENSG00000059915	191.849	0.211755	1.1581	0.354096	0.598016	0.54983	0.826708	protein_coding	KNOWN	PSD	2.17	4.55	3.51	2.9
ENSG00000060069	956.917	-0.00570254	0.996055	0.21172	-0.0269343	0.978512	0.994593	protein_coding	KNOWN	CTDP1	9.2	9.98	8.92	10.02
ENSG00000060138	12337.1	-0.318891	0.801686	0.179487	-1.77668	0.0756204	0.319012	protein_coding	KNOWN	YBX3	436.91	459.21	314.45	343.53
ENSG00000060140	231.411	-0.207879	0.865809	0.29175	-0.712525	0.47614	0.779725	protein_coding	KNOWN	STYK1	3.22	3.8	4.07	2.51
ENSG00000060237	4030.83	-0.121347	0.919329	0.243683	-0.49797	0.618505	0.863331	protein_coding	KNOWN	WNK1	27.5	19.03	19.88	24.53
ENSG00000060339	1583.78	-0.174381	0.886148	0.215969	-0.807432	0.419418	0.742092	protein_coding	KNOWN	CCAR1	29.51	19.34	17.41	21.18
ENSG00000060491	2607.12	-0.136581	0.909672	0.21641	-0.631125	0.527959	0.814256	protein_coding	KNOWN	OGFR	41.44	39.44	31.26	39.46
ENSG00000060566	29.5625	2.01146	4.03189	0.754515	2.66589	0.00767844	0.074005	protein_coding	KNOWN	CREB3L3	0.22	0.11	0.55	0.73
ENSG00000060642	409.358	0.029268	1.02049	0.291645	0.100355	0.920062	0.977533	protein_coding	KNOWN	PIGV	6.16	7.68	7.6	5.33
ENSG00000060656	3210.34	-0.0338382	0.976818	0.179636	-0.18837	0.850586	0.956317	protein_coding	KNOWN	PTPRU	24.69	22.59	23.73	26.33
ENSG00000060688	2561.33	-0.00913812	0.993686	0.207684	-0.0440002	0.964904	0.990108	protein_coding	KNOWN	SNRNP40	61.33	60.9	66.54	51.63
ENSG00000060718	0.25905	-1.36781	0.387478	4.98046	-0.274636	0.783596	NA	protein_coding	KNOWN	COL11A1	0	0.01	0	0
ENSG00000060749	3483.85	-0.0553768	0.962343	0.223628	-0.247629	0.804421	0.938923	protein_coding	KNOWN	QSER1	15.36	13.79	14.58	12.96
ENSG00000060762	414.77	0.365122	1.28799	0.255034	1.43166	0.15224	0.466695	protein_coding	KNOWN	MPC1	16.15	17.5	18.77	21.77
ENSG00000060971	1057.15	-0.929518	0.525034	0.2068	-4.49476	6.96478e-06	0.000303982	protein_coding	KNOWN	ACAA1	34.91	33.93	15.78	19.46
ENSG00000061273	1084.53	-0.0748316	0.949453	0.245774	-0.304474	0.760767	0.922057	protein_coding	KNOWN	HDAC7	14.26	13.86	10.16	14.32
ENSG00000061337	374.886	-0.37162	0.772914	0.247484	-1.50159	0.133203	0.436479	protein_coding	KNOWN	LZTS1	2.5	2.67	1.96	1.9
ENSG00000061455	5.44027	-1.69517	0.308819	1.89055	-0.896653	0.369904	NA	protein_coding	KNOWN	PRDM6	0.54	0.09	0	0.82
ENSG00000061656	29.686	0.203353	1.15137	0.662745	0.306835	0.758969	0.921198	protein_coding	KNOWN	SPAG4	1.3	1.57	1.34	1.22
ENSG00000061676	5305.4	-0.233372	0.850644	0.284678	-0.819776	0.412344	0.737159	protein_coding	KNOWN	NCKAP1	36.16	51.06	45.03	26.46
ENSG00000061794	2332.45	0.10536	1.07576	0.209638	0.502581	0.615259	0.861716	protein_coding	KNOWN	MRPS35	39.82	48.15	50.47	41.18
ENSG00000061936	1264.49	0.256836	1.19486	0.328096	0.782809	0.433739	0.754082	protein_coding	KNOWN	SFSWAP	16.97	9.88	12	18.8
ENSG00000061938	693.43	0.092016	1.06586	0.237108	0.388076	0.69796	0.898627	protein_coding	KNOWN	TNK2	9.35	8.27	9.59	12.18
ENSG00000061987	723.382	-0.549139	0.683428	0.253352	-2.1675	0.030197	0.185404	protein_coding	KNOWN	MON2	4.6	5.05	3.26	2.26
ENSG00000062038	10772.9	0.0560215	1.03959	0.22328	0.250902	0.80189	0.93865	protein_coding	KNOWN	CDH3	186.21	112.18	107.06	183.86
ENSG00000062194	3390.76	0.668707	1.58965	0.183314	3.64787	0.000264418	0.00603784	protein_coding	KNOWN	GPBP1	31.57	35.34	53.46	49.72
ENSG00000062282	360.144	0.273154	1.20845	0.252727	1.08083	0.279774	0.623226	protein_coding	KNOWN	DGAT2	4.71	4.85	5.44	5.97
ENSG00000062370	78.8879	-0.370159	0.773697	0.454616	-0.814222	0.415518	0.739482	protein_coding	KNOWN	ZNF112	0.75	0.95	0.74	0.53
ENSG00000062485	9803.79	-0.135097	0.910609	0.184768	-0.731169	0.464676	0.773699	protein_coding	KNOWN	CS	152.25	122.12	123.58	111.21
ENSG00000062524	130.409	-0.421443	0.746677	0.371167	-1.13545	0.256185	0.598593	protein_coding	KNOWN	LTK	2.22	1.93	1.32	1.69
ENSG00000062582	1251.12	0.163579	1.12006	0.239565	0.682819	0.494721	0.794134	protein_coding	KNOWN	MRPS24	81.83	66.93	70.94	89.5
ENSG00000062598	1557.32	0.0814497	1.05808	0.225153	0.361752	0.717537	0.906442	protein_coding	KNOWN	ELMO2	22.17	19.05	17.94	27.13
ENSG00000062650	2544.4	0.062076	1.04397	0.200111	0.310209	0.756402	0.920805	protein_coding	KNOWN	WAPAL	12.81	15.16	15.54	12.37
ENSG00000062716	4822.6	-0.0672338	0.954466	0.180676	-0.372123	0.709801	0.904238	protein_coding	KNOWN	VMP1	77.11	81.45	82.18	66.69
ENSG00000062725	3143.42	-0.0996237	0.933276	0.214578	-0.464277	0.642449	0.872105	protein_coding	KNOWN	APPBP2	19.25	30.53	27.05	13.57
ENSG00000062822	1314.14	0.270143	1.20593	0.204068	1.32379	0.185573	0.51487	protein_coding	KNOWN	POLD1	19.06	21.29	26.07	27.62
ENSG00000063046	43223	0.312558	1.24191	0.181333	1.72367	0.0847678	0.340507	protein_coding	KNOWN	EIF4B	515.33	458.56	553.05	637.75
ENSG00000063127	22.4248	-0.818599	0.566992	0.898329	-0.911247	0.362165	0.698794	protein_coding	KNOWN	SLC6A16	0.26	1.09	1.24	0.08
ENSG00000063169	339.353	-0.0439493	0.969996	0.277373	-0.158448	0.874103	0.962526	protein_coding	KNOWN	GLTSCR1	4.78	6.07	5.08	3.59
ENSG00000063176	253.362	-0.661109	0.632392	0.308505	-2.14295	0.0321174	0.192336	protein_coding	KNOWN	SPHK2	6.2	5.18	3.04	3.51
ENSG00000063177	22977	0.36158	1.28483	0.181458	1.99264	0.0463013	0.240342	protein_coding	KNOWN	RPL18	1510.23	1766.12	2016.17	2031.69
ENSG00000063180	626.58	0.0829996	1.05922	0.318487	0.260606	0.794396	0.934921	protein_coding	KNOWN	CA11	15.2	13.78	13.1	19.38
ENSG00000063241	1114.56	0.227617	1.1709	0.243708	0.933977	0.350316	0.688845	protein_coding	KNOWN	ISOC2	38.67	32.2	34.38	46.13
ENSG00000063244	6176.73	-0.0110029	0.992402	0.190376	-0.0577956	0.953911	0.987195	protein_coding	KNOWN	U2AF2	95.87	110.03	100.66	91.49
ENSG00000063245	3435.71	0.0763838	1.05437	0.238443	0.320344	0.748708	0.918944	protein_coding	KNOWN	EPN1	49.9	49.03	41.91	58.55
ENSG00000063322	1300.35	-0.627514	0.647291	0.260984	-2.40442	0.0161981	0.12336	protein_coding	KNOWN	MED29	16.64	14.7	9.2	12.95
ENSG00000063438	217.172	-0.693278	0.618447	0.293205	-2.36448	0.0180554	0.131687	protein_coding	KNOWN	AHRR	2.11	2.15	1.34	1.12
ENSG00000063587	854.697	0.233658	1.17581	0.21612	1.08115	0.279629	0.623226	protein_coding	KNOWN	ZNF275	4.1	4.29	5.18	4.35
ENSG00000063601	954.638	-0.081687	0.944952	0.230351	-0.354619	0.722875	0.908419	protein_coding	KNOWN	MTMR1	9.4	8.44	10.03	9.32
ENSG00000063660	4013.14	-0.108113	0.927801	0.191791	-0.563703	0.572956	0.839908	protein_coding	KNOWN	GPC1	51.08	41.46	33.6	44.92
ENSG00000063761	202.882	-0.890785	0.53932	0.354131	-2.51541	0.0118894	0.099321	protein_coding	KNOWN	ADCK1	5.25	4.4	1.9	2.89
ENSG00000063854	1198.37	0.100237	1.07195	0.198445	0.50511	0.613481	0.861096	protein_coding	KNOWN	HAGH	44.7	45.82	48.56	46.1
ENSG00000063978	3456.46	-0.254237	0.83843	0.19451	-1.30706	0.191192	0.52113	protein_coding	KNOWN	RNF4	49.11	44.53	41.98	35.98
ENSG00000064012	1298.44	-0.602956	0.658404	0.221527	-2.72182	0.00649244	0.0655518	protein_coding	KNOWN	CASP8	28.2	25.41	17.23	14.6
ENSG00000064042	408.817	0.604002	1.51993	0.296155	2.03948	0.0414025	0.224459	protein_coding	KNOWN	LIMCH1	2.86	2.05	4.22	4.34
ENSG00000064102	2347.14	0.0811904	1.05789	0.208379	0.389629	0.696811	0.898614	protein_coding	KNOWN	ASUN	52.58	40.79	35.73	56.87
ENSG00000064115	1754.58	-1.1567	0.448537	0.22663	-5.10391	3.32698e-07	2.11455e-05	protein_coding	KNOWN	TM7SF3	36.7	48.29	22.41	17.05
ENSG00000064199	369.004	-0.366941	0.775425	0.345312	-1.06264	0.287946	0.631878	protein_coding	KNOWN	SPA17	17.98	11.21	10.01	15.16
ENSG00000064225	488.305	0.630009	1.54757	0.255209	2.4686	0.0135642	0.108924	protein_coding	KNOWN	ST3GAL6	7.83	9.76	12.14	10.16
ENSG00000064270	312.688	0.4475	1.36368	0.270473	1.65451	0.0980236	0.368577	protein_coding	KNOWN	ATP2C2	2.6	3.26	4.39	4.29
ENSG00000064300	788.271	0.893694	1.85793	0.225328	3.96619	7.30294e-05	0.00214759	protein_coding	KNOWN	NGFR	5.52	5.76	9.36	10.83
ENSG00000064309	691.972	-0.197215	0.872233	0.236443	-0.834093	0.404228	0.731163	protein_coding	KNOWN	CDON	5.15	6.9	5.35	3.71
ENSG00000064313	2690.15	-0.21727	0.860192	0.194219	-1.11869	0.263274	0.60622	protein_coding	KNOWN	TAF2	32.07	25.1	22.5	23.72
ENSG00000064393	5186.61	-0.59078	0.663984	0.178443	-3.31076	0.000930441	0.015882	protein_coding	KNOWN	HIPK2	18.72	14.78	9.67	11.31
ENSG00000064419	2632.49	-0.0563657	0.961684	0.1835	-0.307171	0.758713	0.921061	protein_coding	KNOWN	TNPO3	24.32	27.84	25.17	23.24
ENSG00000064489	67.5387	1.21871	2.32738	0.619518	1.96719	0.0491619	0.248323	protein_coding	KNOWN	MEF2BNB-MEF2B	0.69	1.62	1.68	3.4
ENSG00000064490	981.795	-0.39992	0.7579	0.258423	-1.54754	0.121733	0.413126	protein_coding	KNOWN	RFXANK	47.96	60.63	34.75	46.34
ENSG00000064545	1174.1	-0.0503987	0.965669	0.236237	-0.213339	0.831062	0.948585	protein_coding	KNOWN	TMEM161A	32.05	36.06	25.68	34.67
ENSG00000064547	653.463	0.0268414	1.01878	0.224504	0.119558	0.904833	0.973778	protein_coding	KNOWN	LPAR2	20.06	15.91	15.21	17.64
ENSG00000064601	3332.92	-0.89987	0.535935	0.237797	-3.78419	0.000154208	0.00387559	protein_coding	KNOWN	CTSA	96.88	78.59	38.73	51.85
ENSG00000064607	2284.23	1.26828	2.40873	0.200854	6.31442	2.71185e-10	3.63125e-08	protein_coding	KNOWN	SUGP2	14.26	13.37	27.45	36.58
ENSG00000064651	1881.23	-0.505744	0.704297	0.317626	-1.59226	0.111326	0.394078	protein_coding	KNOWN	SLC12A2	10.14	13.57	9.72	5.81
ENSG00000064652	280.003	-0.454642	0.729691	0.287286	-1.58254	0.113526	0.397902	protein_coding	KNOWN	SNX24	8.13	7.72	5.72	7.71
ENSG00000064666	7116.45	-0.076021	0.948671	0.201972	-0.376394	0.706624	0.903138	protein_coding	KNOWN	CNN2	155.33	150.1	130.69	158.23
ENSG00000064687	655.661	-0.411638	0.751769	0.239082	-1.72174	0.0851159	0.341175	protein_coding	KNOWN	ABCA7	8.62	8.6	7.66	9.57
ENSG00000064703	1284.18	-0.15169	0.900195	0.214166	-0.708283	0.47877	0.781628	protein_coding	KNOWN	DDX20	12.14	10.22	9.53	10.15
ENSG00000064726	3145.62	-0.31129	0.805921	0.187867	-1.65697	0.0975255	0.367506	protein_coding	KNOWN	BTBD1	39.73	38.92	31.75	28.44
ENSG00000064763	230.951	-0.176242	0.885005	0.311366	-0.566029	0.571374	0.839026	protein_coding	KNOWN	FAR2	7.39	5.8	5.81	5.5
ENSG00000064787	7.09201	1.25702	2.39002	1.31947	0.952674	0.340755	NA	protein_coding	KNOWN	BCAS1	0.04	0.09	0.22	0.13
ENSG00000064886	0.954032	0.302581	1.23335	3.52997	0.0857176	0.931691	NA	protein_coding	KNOWN	CHI3L2	0.37	0	0.03	0.02
ENSG00000064932	1795.95	0.416195	1.3344	0.190119	2.18913	0.0285877	0.178569	protein_coding	KNOWN	SBNO2	14.23	11.11	13.93	18.98
ENSG00000064933	1027.2	-0.0200625	0.98619	0.211542	-0.0948396	0.924442	0.97856	protein_coding	KNOWN	PMS1	12.43	12.19	13.04	11.33
ENSG00000064961	3075.71	0.390645	1.31098	0.312841	1.2487	0.211774	0.546658	protein_coding	KNOWN	HMG20B	73.56	52.08	57.77	102.58
ENSG00000064989	63.3978	0.235915	1.17765	0.572763	0.411889	0.68042	0.889942	protein_coding	KNOWN	CALCRL	0.26	0.57	0.66	0.46
ENSG00000064995	991.438	-0.389117	0.763597	0.233352	-1.66751	0.0954135	0.363319	protein_coding	KNOWN	TAF11	25.64	28.11	22.47	16.97
ENSG00000064999	1754.9	-0.622192	0.649683	0.207089	-3.00447	0.00266044	0.0340878	protein_coding	KNOWN	ANKS1A	11.03	11.89	8.02	6.39
ENSG00000065000	6744.64	-0.354408	0.78219	0.207255	-1.71001	0.0872642	0.345549	protein_coding	KNOWN	AP3D1	55.24	52.99	38.33	44.43
ENSG00000065029	434.19	-0.266793	0.831165	0.241447	-1.10498	0.26917	0.612202	protein_coding	KNOWN	ZNF76	6.65	7.32	6.54	5.46
ENSG00000065054	1276.26	0.133268	1.09678	0.27235	0.489328	0.62461	0.865467	protein_coding	KNOWN	SLC9A3R2	39.08	35.57	31.38	46.33
ENSG00000065057	580.187	0.206504	1.15389	0.246231	0.83866	0.40166	0.729291	protein_coding	KNOWN	NTHL1	19.2	22.42	20.47	24.81
ENSG00000065060	871.578	-0.0982333	0.934176	0.244052	-0.402509	0.687309	0.893858	protein_coding	KNOWN	UHRF1BP1	2.96	3.39	3.32	2.41
ENSG00000065135	4475.05	0.0838937	1.05987	0.245293	0.342014	0.73234	0.912498	protein_coding	KNOWN	GNAI3	41	54.2	57.27	40.2
ENSG00000065150	11676.1	-0.0250107	0.982813	0.271505	-0.0921187	0.926604	0.979047	protein_coding	KNOWN	IPO5	73.25	108.2	106.46	62.72
ENSG00000065154	6653.41	0.484241	1.39885	0.247739	1.95464	0.050625	0.252521	protein_coding	KNOWN	OAT	94.71	115.89	162.95	115.3
ENSG00000065183	4411.63	-0.260986	0.834517	0.18408	-1.41779	0.156254	0.47095	protein_coding	KNOWN	WDR3	67.54	52.8	47.66	47.94
ENSG00000065243	2817.46	0.0358951	1.02519	0.213039	0.168491	0.866197	0.960341	protein_coding	KNOWN	PKN2	16.65	18.8	19.47	13.68
ENSG00000065268	1290.08	-0.0126185	0.991292	0.20287	-0.0622001	0.950403	0.986302	protein_coding	KNOWN	WDR18	32.14	35.47	30.36	32.85
ENSG00000065308	1582.67	-0.643332	0.640232	0.19912	-3.23087	0.00123414	0.0195646	protein_coding	KNOWN	TRAM2	9.11	9.85	6.32	5.41
ENSG00000065320	690.87	-0.207671	0.865934	0.22585	-0.919509	0.357829	0.695739	protein_coding	KNOWN	NTN1	4.22	4.31	3.42	3.78
ENSG00000065328	1688.74	0.153603	1.11234	0.215035	0.714314	0.475033	0.778943	protein_coding	KNOWN	MCM10	19.3	16.4	15.5	15.28
ENSG00000065357	902.856	-0.768574	0.586997	0.216785	-3.54533	0.000392122	0.00819415	protein_coding	KNOWN	DGKA	35.42	25.44	14.68	18.46
ENSG00000065361	1117.85	-0.31734	0.802548	0.207901	-1.5264	0.126911	0.423815	protein_coding	KNOWN	ERBB3	11.44	11.31	12.08	16.86
ENSG00000065413	51.9165	0.525234	1.43917	0.523588	1.00314	0.315792	0.65913	protein_coding	KNOWN	ANKRD44	0.88	0.92	3.32	1.24
ENSG00000065427	7123.52	0.0078156	1.00543	0.17507	0.0446428	0.964392	0.989956	protein_coding	KNOWN	KARS	126.46	133.18	123.65	127.75
ENSG00000065457	598.909	-0.512026	0.701237	0.227691	-2.24878	0.0245266	0.162007	protein_coding	KNOWN	ADAT1	23.44	25.12	17.4	17.07
ENSG00000065485	1297.67	-0.0389297	0.973377	0.196645	-0.197969	0.843069	0.953942	protein_coding	KNOWN	PDIA5	29.26	27.53	28.48	30.21
ENSG00000065491	586.159	0.0100057	1.00696	0.254921	0.0392501	0.968691	0.991627	protein_coding	KNOWN	TBC1D22B	6.16	5.62	5.05	6.37
ENSG00000065518	3177.19	0.0545472	1.03853	0.221534	0.246225	0.805508	0.938965	protein_coding	KNOWN	NDUFB4	205.3	221.68	245.86	182.44
ENSG00000065526	4704.6	0.222686	1.1669	0.275522	0.808232	0.418957	0.742039	protein_coding	KNOWN	SPEN	28.42	16.09	16.56	33.63
ENSG00000065534	216.822	-0.102382	0.931494	0.32395	-0.316042	0.75197	0.919122	protein_coding	KNOWN	MYLK	1.34	1.36	1.29	1.09
ENSG00000065548	3645.55	0.014716	1.01025	0.198593	0.0741012	0.94093	0.984699	protein_coding	KNOWN	ZC3H15	66.47	59.97	57.37	64.26
ENSG00000065559	2100.25	0.57613	1.49084	0.196811	2.92732	0.00341893	0.0410748	protein_coding	KNOWN	MAP2K4	14.55	16.76	23.96	20.73
ENSG00000065600	775.88	0.0802426	1.0572	0.222013	0.361432	0.717776	0.906442	protein_coding	KNOWN	TMEM206	17.55	18.88	19.32	15.55
ENSG00000065613	1694.76	-0.00356177	0.997534	0.212547	-0.0167576	0.98663	0.997478	protein_coding	KNOWN	SLK	9.9	6.99	7.62	9.01
ENSG00000065615	852.678	0.244248	1.18448	0.224755	1.08673	0.277155	0.620509	protein_coding	KNOWN	CYB5R4	12.28	12.65	15.9	12.64
ENSG00000065618	208.557	-1.85498	0.276436	0.335088	-5.53581	3.09796e-08	2.67044e-06	protein_coding	KNOWN	COL17A1	4.7	3.09	0.77	1.13
ENSG00000065621	1399.2	-0.323502	0.799128	0.24486	-1.32117	0.186445	0.515837	protein_coding	KNOWN	GSTO2	56.3	78.95	59.91	44.6
ENSG00000065665	216.575	0.181412	1.13399	0.29892	0.60689	0.543924	0.824049	protein_coding	KNOWN	SEC61A2	4.36	4.43	3.99	4.86
ENSG00000065675	173.856	-0.415444	0.749789	0.316407	-1.313	0.189182	0.518001	protein_coding	KNOWN	PRKCQ	2.15	2.08	1.64	1.58
ENSG00000065717	1331.51	0.686163	1.609	0.245865	2.79081	0.00525761	0.0564103	protein_coding	KNOWN	TLE2	23.73	16.5	27.73	42.28
ENSG00000065802	1367.65	-0.0446845	0.969502	0.207626	-0.215216	0.829599	0.948428	protein_coding	KNOWN	ASB1	25.49	17.35	17.93	24.23
ENSG00000065809	1794.92	0.524559	1.43849	0.198299	2.64529	0.00816211	0.0774755	protein_coding	KNOWN	FAM107B	26	21.21	31.64	33.65
ENSG00000065833	2725.43	0.20474	1.15248	0.249738	0.81982	0.412318	0.737159	protein_coding	KNOWN	ME1	25.39	35.69	39.62	24.04
ENSG00000065882	2737.94	0.347349	1.27222	0.195209	1.77937	0.0751796	0.318451	protein_coding	KNOWN	TBC1D1	30.42	37.46	38.55	41.3
ENSG00000065883	1102.77	0.0620201	1.04393	0.200277	0.309672	0.75681	0.920805	protein_coding	KNOWN	CDK13	7.63	6.34	7.35	7.16
ENSG00000065911	7934.52	0.545438	1.45946	0.256408	2.12723	0.0334011	0.196976	protein_coding	KNOWN	MTHFD2	98.57	126	190.57	137.85
ENSG00000065923	475.858	0.35111	1.27554	0.290386	1.20911	0.226619	0.565443	protein_coding	KNOWN	SLC9A7	4.74	5.65	7.69	4.52
ENSG00000065970	1490.63	-0.0677382	0.954133	0.218419	-0.310129	0.756463	0.920805	protein_coding	KNOWN	FOXJ2	10.27	8.86	8.15	9.56
ENSG00000065978	50442.4	0.297056	1.22863	0.288901	1.02823	0.303842	0.648097	protein_coding	KNOWN	YBX1	1377.82	881.58	1102.45	1574.11
ENSG00000065989	1930.64	0.160373	1.11758	0.206328	0.777274	0.436997	0.756408	protein_coding	KNOWN	PDE4A	15.12	13.3	15.05	15.5
ENSG00000066027	1689.81	0.321709	1.24981	0.23607	1.36277	0.172955	0.496855	protein_coding	KNOWN	PPP2R5A	14.72	19.38	23.09	17.88
ENSG00000066044	5260.03	-0.0149273	0.989707	0.174542	-0.0855225	0.931846	0.980546	protein_coding	KNOWN	ELAVL1	85.94	77.11	73.46	82.91
ENSG00000066084	2687.68	-0.444264	0.734959	0.245067	-1.81283	0.0698585	0.303074	protein_coding	KNOWN	DIP2B	11.77	12.74	10.67	6.89
ENSG00000066117	2771.26	-0.704968	0.613456	0.184284	-3.82544	0.000130541	0.00342285	protein_coding	KNOWN	SMARCD1	45.47	49.08	32.5	24.63
ENSG00000066135	3015.87	-0.283998	0.821312	0.181441	-1.56524	0.117526	0.405606	protein_coding	KNOWN	KDM4A	27.31	30.58	24.45	20.36
ENSG00000066136	1854.73	-0.0149824	0.989669	0.228752	-0.0654964	0.947779	0.986077	protein_coding	KNOWN	NFYC	49.76	35.23	35.69	47.46
ENSG00000066185	19.9202	-0.0583008	0.960395	0.805374	-0.0723897	0.942292	NA	protein_coding	KNOWN	ZMYND12	0.6	0.39	0.38	0.8
ENSG00000066248	267.434	0.57154	1.48611	0.273848	2.08707	0.0368817	0.209817	protein_coding	KNOWN	NGEF	7.67	6.91	9.54	9.77
ENSG00000066279	1286.78	1.03924	2.05515	0.209933	4.95037	7.40737e-07	4.27458e-05	protein_coding	KNOWN	ASPM	3.24	3.89	9.17	6.74
ENSG00000066322	2696.21	-0.15651	0.897193	0.187829	-0.833259	0.404699	0.731726	protein_coding	KNOWN	ELOVL1	78.08	92.41	80.32	68.59
ENSG00000066379	564.611	0.0512225	1.03614	0.321222	0.159461	0.873305	0.962339	protein_coding	KNOWN	ZNRD1	23.8	35.52	34.91	22.86
ENSG00000066422	1541.45	0.14262	1.10391	0.220767	0.646021	0.518266	0.80836	protein_coding	KNOWN	ZBTB11	8.08	8.89	10.16	7.8
ENSG00000066427	513.957	-0.223492	0.85649	0.30773	-0.72626	0.467679	0.775126	protein_coding	KNOWN	ATXN3	13.36	20.97	14.34	8.4
ENSG00000066455	1340.82	0.450918	1.36691	0.225541	1.99927	0.0455788	0.238624	protein_coding	KNOWN	GOLGA5	15.09	12.81	18.42	19.93
ENSG00000066468	747.788	0.488856	1.40333	0.22639	2.15935	0.0308227	0.187312	protein_coding	KNOWN	FGFR2	6.45	6.68	10.14	7.83
ENSG00000066557	742.243	-0.257168	0.836729	0.215294	-1.1945	0.232284	0.572805	protein_coding	KNOWN	LRRC40	10.12	9.66	8.29	7.7
ENSG00000066583	1459.82	0.39703	1.31679	0.194151	2.04495	0.0408596	0.222317	protein_coding	KNOWN	ISOC1	24.04	25.93	31.14	29.49
ENSG00000066629	313.774	0.541949	1.45594	0.320343	1.69178	0.0906884	0.353548	protein_coding	KNOWN	EML1	3.77	3.49	4.8	3.05
ENSG00000066651	465.329	0.194703	1.14449	0.250431	0.777472	0.43688	0.756302	protein_coding	KNOWN	TRMT11	8.39	9.3	10.31	8.7
ENSG00000066654	1797.89	0.48915	1.40362	0.188283	2.59796	0.00937797	0.0847582	protein_coding	KNOWN	THUMPD1	13.84	14.93	19.95	17.99
ENSG00000066697	974.681	0.0584329	1.04133	0.264092	0.22126	0.82489	0.946309	protein_coding	KNOWN	MSANTD3	34.69	24.39	24.63	32.46
ENSG00000066735	260.467	-0.0349965	0.976034	0.278656	-0.12559	0.900056	0.971826	protein_coding	KNOWN	KIF26A	1.38	1.28	1.29	1.22
ENSG00000066739	77.3563	-0.00424082	0.997065	0.470172	-0.00901972	0.992803	0.998816	protein_coding	KNOWN	ATG2B	0.52	0.19	0.62	0.29
ENSG00000066777	1162.13	-0.131082	0.913146	0.234252	-0.559579	0.575767	0.841884	protein_coding	KNOWN	ARFGEF1	8.82	10.07	6.03	5.64
ENSG00000066827	292.975	-0.13906	0.908111	0.267439	-0.51997	0.603084	0.855999	protein_coding	KNOWN	ZFAT	4.87	2.84	2.93	3.63
ENSG00000066855	2061.16	0.325297	1.25292	0.249813	1.30216	0.192862	0.522686	protein_coding	KNOWN	MTFR1	34.47	32.83	37.97	33.66
ENSG00000066923	27.4975	0.450617	1.36662	0.686266	0.656622	0.511424	0.804097	protein_coding	KNOWN	STAG3	0.45	0.49	0.7	0.62
ENSG00000066926	1295.84	-0.328634	0.79629	0.217018	-1.51431	0.129946	0.429492	protein_coding	KNOWN	FECH	32.44	22.18	18.25	19.59
ENSG00000066933	742.504	0.169708	1.12483	0.22844	0.742898	0.457544	0.769687	protein_coding	KNOWN	MYO9A	2.47	2.88	3.51	2.79
ENSG00000067057	11105.9	-0.171965	0.887633	0.187403	-0.917625	0.358815	0.696129	protein_coding	KNOWN	PFKP	170.74	153.37	134.25	140.73
ENSG00000067064	4105.46	1.08276	2.11809	0.181658	5.96044	2.5156e-09	2.77561e-07	protein_coding	KNOWN	IDI1	44.35	45.53	100.56	83.41
ENSG00000067066	1792.32	-1.20372	0.434154	0.188762	-6.37695	1.80655e-10	2.49159e-08	protein_coding	KNOWN	SP100	51.12	47.12	21.89	25.1
ENSG00000067082	6197.12	0.913523	1.88364	0.217321	4.20356	2.62753e-05	0.000886038	protein_coding	KNOWN	KLF6	49.54	31.61	57.83	82.71
ENSG00000067113	352.741	0.457538	1.3732	0.26107	1.75255	0.0796791	0.327454	protein_coding	KNOWN	PPAP2A	7.47	6.68	9.76	9.01
ENSG00000067141	2820.79	-0.0218797	0.984949	0.194293	-0.112612	0.910338	0.9749	protein_coding	KNOWN	NEO1	26.97	18.86	17.74	24.65
ENSG00000067167	8697.63	-0.329984	0.795545	0.256267	-1.28766	0.197864	0.527031	protein_coding	KNOWN	TRAM1	182.24	136.76	115.76	117.16
ENSG00000067177	1005.68	-0.298677	0.812998	0.241684	-1.23582	0.216527	0.552924	protein_coding	KNOWN	PHKA1	6.16	7.83	6.1	4.57
ENSG00000067182	3248.75	0.381559	1.30275	0.253528	1.505	0.132325	0.434529	protein_coding	KNOWN	TNFRSF1A	113.33	49.51	59.33	146.53
ENSG00000067191	149.925	0.512895	1.42691	0.368261	1.39275	0.163696	0.482868	protein_coding	KNOWN	CACNB1	1.62	1	2.19	1.91
ENSG00000067208	878.266	0.235664	1.17745	0.327153	0.720348	0.47131	0.777364	protein_coding	KNOWN	EVI5	4.87	7.22	7.1	5.8
ENSG00000067221	86.2903	-0.374076	0.771599	0.434983	-0.85998	0.3898	0.721205	protein_coding	KNOWN	STOML1	1.64	2.15	1.72	1.17
ENSG00000067225	125324	0.0954012	1.06836	0.245963	0.387869	0.698113	0.898627	protein_coding	KNOWN	PKM	2104.3	1755.23	1684.94	2322.2
ENSG00000067248	1428.71	-0.350193	0.784479	0.1925	-1.81918	0.0688843	0.300584	protein_coding	KNOWN	DHX29	12.16	12.79	9.51	9.5
ENSG00000067334	2174.46	-0.0333045	0.97718	0.189332	-0.175905	0.860368	0.959428	protein_coding	KNOWN	DNTTIP2	30.33	27.89	27.56	27.24
ENSG00000067365	270.764	-0.219882	0.858636	0.28293	-0.777158	0.437065	0.756432	protein_coding	KNOWN	METTL22	7.93	7.37	6.61	7.13
ENSG00000067369	2432.41	-0.369486	0.774058	0.184354	-2.00422	0.0450466	0.23695	protein_coding	KNOWN	TP53BP1	16.28	17.98	13.24	12.94
ENSG00000067533	1069.17	-0.127729	0.915271	0.201048	-0.635315	0.525223	0.813059	protein_coding	KNOWN	RRP15	6.13	10.4	11.73	5.53
ENSG00000067560	19854.3	0.915381	1.88607	0.170056	5.38283	7.33236e-08	5.77873e-06	protein_coding	KNOWN	RHOA	248.36	256.73	465.13	439.56
ENSG00000067596	2840.09	-0.508389	0.703007	0.19169	-2.65214	0.00799845	0.076079	protein_coding	KNOWN	DHX8	25.37	29.76	21.28	17.65
ENSG00000067601	13.5905	-0.322105	0.799902	0.984064	-0.327321	0.743425	NA	pseudogene	KNOWN	PMS2P4	2.15	1.44	0.97	1.75
ENSG00000067606	1703.81	-0.023048	0.984151	0.271089	-0.0850199	0.932246	0.980667	protein_coding	KNOWN	PRKCZ	33.11	27.34	22.26	33.94
ENSG00000067704	4800.21	0.344804	1.26998	0.26096	1.32129	0.186405	0.515831	protein_coding	KNOWN	IARS2	37.71	49.15	60.73	46.16
ENSG00000067715	2078.75	0.0327298	1.02295	0.200624	0.16314	0.870408	0.961989	protein_coding	KNOWN	SYT1	14.32	16.09	16.63	13.79
ENSG00000067798	659.137	0.480458	1.39519	0.251984	1.9067	0.0565593	0.269864	protein_coding	KNOWN	NAV3	5.76	3.74	7.94	6.75
ENSG00000067829	1963.87	0.3154	1.24436	0.239818	1.31517	0.188454	0.517788	protein_coding	KNOWN	IDH3G	51.3	44.56	48.44	60.97
ENSG00000067836	366.383	-0.560607	0.678017	0.367929	-1.52369	0.127587	0.424916	protein_coding	KNOWN	ROGDI	21.21	10.09	5.65	13.29
ENSG00000067842	0.256075	1.60924	3.0509	4.99486	0.322178	0.747318	NA	protein_coding	KNOWN	ATP2B3	0	0	0	0.05
ENSG00000067900	2775.46	0.335358	1.26169	0.187737	1.78632	0.0740472	0.314915	protein_coding	KNOWN	ROCK1	12.02	13.15	16.28	14.45
ENSG00000067955	3227.63	0.203464	1.15146	0.280233	0.726053	0.467807	0.775126	protein_coding	KNOWN	CBFB	58.38	64.86	65.66	56.65
ENSG00000067992	262.841	0.539545	1.45351	0.376683	1.43236	0.152042	0.466695	protein_coding	KNOWN	PDK3	2.79	5.68	6.5	5.27
ENSG00000068001	2688.82	-0.310145	0.806561	0.185288	-1.67386	0.0941586	0.361045	protein_coding	KNOWN	HYAL2	54.63	54.78	44.83	39.88
ENSG00000068024	781.615	-0.365261	0.776329	0.240217	-1.52054	0.128374	0.426328	protein_coding	KNOWN	HDAC4	5.32	5.39	4.99	3.94
ENSG00000068028	344.445	0.504068	1.41821	0.260403	1.93572	0.0529021	0.259746	protein_coding	KNOWN	RASSF1	5.62	6.56	8.03	8.29
ENSG00000068078	665.33	0.745468	1.67652	0.227041	3.28341	0.00102561	0.0170424	protein_coding	KNOWN	FGFR3	4.39	4.61	7.93	7.1
ENSG00000068079	544.529	-2.27017	0.207306	0.237526	-9.55753	1.20601e-21	7.92061e-19	protein_coding	KNOWN	IFI35	30.43	29.82	5.5	5.88
ENSG00000068097	1425.89	-0.174597	0.886015	0.206526	-0.8454	0.397888	0.726266	protein_coding	KNOWN	HEATR6	14.03	13.21	14.25	11.33
ENSG00000068120	3285.22	0.0344043	1.02413	0.185064	0.185905	0.85252	0.956787	protein_coding	KNOWN	COASY	55.21	59.95	54.46	53.71
ENSG00000068137	1081.97	0.256698	1.19474	0.218439	1.17515	0.239936	0.581478	protein_coding	KNOWN	PLEKHH3	28.61	21.72	24.37	31.49
ENSG00000068305	1094.67	-0.200256	0.870396	0.219132	-0.913859	0.360791	0.697905	protein_coding	KNOWN	MEF2A	10.49	8.3	7.21	6.36
ENSG00000068308	1992.33	-0.0665142	0.954943	0.291993	-0.227794	0.819807	0.944722	protein_coding	KNOWN	OTUD5	33.63	24.86	21.65	31.53
ENSG00000068323	930.697	-0.125087	0.916949	0.231063	-0.541353	0.588265	0.847766	protein_coding	KNOWN	TFE3	10.65	9.86	8.02	9.84
ENSG00000068354	501.657	-0.266458	0.831358	0.253118	-1.0527	0.292477	0.637862	protein_coding	KNOWN	TBC1D25	7.68	5.29	5.35	4.9
ENSG00000068366	4345.49	0.74963	1.68136	0.177475	4.22387	2.40142e-05	0.000825944	protein_coding	KNOWN	ACSL4	22.96	25.41	38.38	34.62
ENSG00000068383	419.488	1.17075	2.25128	0.296932	3.9428	8.05353e-05	0.0023286	protein_coding	KNOWN	INPP5A	2.61	3.97	7.32	6.91
ENSG00000068394	872.436	0.147154	1.10738	0.228322	0.644501	0.519251	0.808844	protein_coding	KNOWN	GPKOW	17.33	18.01	17.04	20.65
ENSG00000068400	945.155	-0.074666	0.949562	0.280293	-0.266385	0.789942	0.933341	protein_coding	KNOWN	GRIPAP1	12.5	10.07	8.41	12.17
ENSG00000068438	1484.61	0.027844	1.01949	0.221398	0.125764	0.899919	0.971826	protein_coding	KNOWN	FTSJ1	44.78	33.76	34.87	43.54
ENSG00000068489	2281.4	0.773071	1.7089	0.221383	3.492	0.000479411	0.00963855	protein_coding	KNOWN	PRR11	29.86	26.11	41.53	50.99
ENSG00000068615	475.103	1.28433	2.43569	0.290903	4.41499	1.01016e-05	0.000412195	protein_coding	KNOWN	REEP1	3.78	3.8	7.46	6.42
ENSG00000068650	2783.58	-0.196681	0.872555	0.242752	-0.810217	0.417816	0.740778	protein_coding	KNOWN	ATP11A	14.76	16.68	15.82	10.39
ENSG00000068654	3445.71	-0.834594	0.560741	0.2021	-4.12962	3.63368e-05	0.00117643	protein_coding	KNOWN	POLR1A	11.71	17.24	8.98	6.94
ENSG00000068697	5166.78	0.158111	1.11582	0.182717	0.865332	0.386857	0.719323	protein_coding	KNOWN	LAPTM4A	196.77	104.6	118.2	211.67
ENSG00000068724	1017.52	-0.268391	0.830245	0.206321	-1.30084	0.193313	0.523086	protein_coding	KNOWN	TTC7A	8.29	10.16	7.76	8.06
ENSG00000068745	2733.09	0.0223793	1.01563	0.242989	0.0920999	0.926619	0.979047	protein_coding	KNOWN	IP6K2	69.34	59.11	55.88	82.46
ENSG00000068781	2.20092	4.67357	25.5203	3.56115	1.31238	0.189393	NA	protein_coding	KNOWN	STON1-GTF2A1L	0	0	0.09	0
ENSG00000068784	567.98	-0.0462827	0.968428	0.242469	-0.190881	0.848619	0.95565	protein_coding	KNOWN	SRBD1	5.78	5.66	5.11	6.29
ENSG00000068793	7211.99	-0.399025	0.75837	0.235918	-1.69138	0.0907651	0.353675	protein_coding	KNOWN	CYFIP1	58.99	96.25	71.67	46
ENSG00000068796	1686.52	0.203725	1.15167	0.209987	0.97018	0.331957	0.673884	protein_coding	KNOWN	KIF2A	22.53	21.61	25.79	21.02
ENSG00000068831	125.291	0.9963	1.99488	0.362467	2.74866	0.00598391	0.0620061	protein_coding	KNOWN	RASGRP2	2.38	2.41	7.5	7.41
ENSG00000068878	2291.31	-0.225616	0.85523	0.223844	-1.00792	0.313493	0.656598	protein_coding	KNOWN	PSME4	14.22	16.25	14.36	11.8
ENSG00000068885	539.896	0.478926	1.39371	0.267514	1.79029	0.0734076	0.313822	protein_coding	KNOWN	IFT80	6.21	6.06	9.28	6.29
ENSG00000068903	590.254	-0.571134	0.673088	0.264009	-2.16331	0.0305171	0.186711	protein_coding	KNOWN	SIRT2	13.7	11.6	7.04	9.78
ENSG00000068912	1671.63	0.302157	1.23299	0.203502	1.48479	0.1376	0.443509	protein_coding	KNOWN	ERLEC1	27.12	23	27.05	32.79
ENSG00000068971	506.921	-0.236886	0.848575	0.23261	-1.01838	0.308496	0.651674	protein_coding	KNOWN	PPP2R5B	7.59	7.99	7.66	6.15
ENSG00000068976	18.0808	-0.137301	0.909218	0.922646	-0.148812	0.881702	NA	protein_coding	KNOWN	PYGM	0.28	0.24	0.48	0.29
ENSG00000069011	561.739	0.112096	1.0808	0.254476	0.440496	0.659578	0.880981	protein_coding	KNOWN	PITX1	14.31	9.48	10.54	13.98
ENSG00000069020	287.458	-0.124237	0.917489	0.275075	-0.451649	0.651522	0.875961	protein_coding	KNOWN	MAST4	2.24	1.11	1.9	1.32
ENSG00000069122	0.256075	1.60924	3.0509	4.99486	0.322178	0.747318	NA	protein_coding	KNOWN	GPR116	0	0	0	0.01
ENSG00000069248	2296.94	-0.338643	0.790785	0.228755	-1.48037	0.138774	0.445831	protein_coding	KNOWN	NUP133	25.53	24.57	18.07	22.28
ENSG00000069275	10192.4	0.375427	1.29722	0.19037	1.97209	0.0485993	0.247089	protein_coding	KNOWN	NUCKS1	47.67	49.69	68.3	54.87
ENSG00000069329	6381.43	-0.0828505	0.94419	0.197057	-0.420439	0.674164	0.887633	protein_coding	KNOWN	VPS35	54.9	53.83	56.54	46.79
ENSG00000069345	3697.43	0.0432816	1.03046	0.178224	0.24285	0.808122	0.939702	protein_coding	KNOWN	DNAJA2	53.02	56.24	53.39	53.69
ENSG00000069399	536.501	0.102237	1.07344	0.235108	0.434852	0.66367	0.883156	protein_coding	KNOWN	BCL3	17.3	8.89	10.82	15.52
ENSG00000069424	330.614	0.224982	1.16876	0.26171	0.859661	0.389976	0.721276	protein_coding	KNOWN	KCNAB2	4	4.24	4.7	4.14
ENSG00000069482	817.676	0.53026	1.44419	0.28425	1.86547	0.0621154	0.285021	protein_coding	KNOWN	GAL	27.57	42.66	54.47	43.21
ENSG00000069493	4.26439	1.22027	2.3299	2.04903	0.595536	0.551485	NA	protein_coding	KNOWN	CLEC2D	0	0.56	0.52	0.19
ENSG00000069509	543.18	-0.0707281	0.952157	0.246115	-0.287378	0.773823	0.926539	protein_coding	KNOWN	FUNDC1	17.44	19.02	18.76	14.83
ENSG00000069535	1302.44	-0.103919	0.930502	0.262403	-0.39603	0.692083	0.896161	protein_coding	KNOWN	MAOB	20.09	17.34	13.81	19.9
ENSG00000069667	3.22819	3.61843	12.2817	2.40598	1.50393	0.132599	NA	protein_coding	KNOWN	RORA	0	0.01	0.04	0.03
ENSG00000069702	319.874	0.400371	1.31985	0.316113	1.26655	0.205318	0.538252	protein_coding	KNOWN	TGFBR3	2.21	1.91	2.46	2.78
ENSG00000069712	140.381	0.570731	1.48528	0.342123	1.6682	0.0952753	0.363144	protein_coding	KNOWN	KIAA1107	0.84	0.84	1.26	1.16
ENSG00000069764	11.9724	-1.00664	0.497703	1.02456	-0.982509	0.325849	NA	protein_coding	KNOWN	PLA2G10	0.58	0.73	0.31	0.31
ENSG00000069812	688.752	-1.21245	0.431536	0.233669	-5.18875	2.11705e-07	1.43834e-05	protein_coding	KNOWN	HES2	8.97	12.54	6.47	5.52
ENSG00000069849	4980.44	0.199449	1.14826	0.295949	0.67393	0.500356	0.797521	protein_coding	KNOWN	ATP1B3	74.28	133.06	144.7	85.75
ENSG00000069869	446.245	1.82559	3.54452	0.26209	6.96551	3.27212e-12	6.73568e-10	protein_coding	KNOWN	NEDD4	1.54	2.09	4.46	3.53
ENSG00000069943	190.294	-0.718326	0.607802	0.325364	-2.20776	0.027261	0.173264	protein_coding	KNOWN	PIGB	4.65	6.12	3.36	2.48
ENSG00000069956	4679.85	0.191396	1.14187	0.198403	0.964682	0.334704	0.676897	protein_coding	KNOWN	MAPK6	37.5	36.54	44.24	35.21
ENSG00000069966	976.202	0.313463	1.24269	0.288387	1.08695	0.277058	0.620509	protein_coding	KNOWN	GNB5	17.05	15.8	22.36	17.42
ENSG00000069974	414.795	0.40988	1.32858	0.243344	1.68436	0.0921115	0.356132	protein_coding	KNOWN	RAB27A	7.7	6.94	8.59	9.39
ENSG00000069998	2011.81	-0.00237327	0.998356	0.196609	-0.012071	0.990369	0.998816	protein_coding	KNOWN	CECR5	39.18	46.98	42.7	39.92
ENSG00000070010	2925.9	0.101002	1.07252	0.209729	0.48158	0.630104	0.867562	protein_coding	KNOWN	UFD1L	138.61	108.6	135.22	163.37
ENSG00000070018	1735.41	0.231934	1.17441	0.219824	1.05509	0.291384	0.636283	protein_coding	KNOWN	LRP6	12.28	6.84	8.28	9.82
ENSG00000070047	2664.48	-0.0753821	0.949091	0.228862	-0.329378	0.74187	0.916096	protein_coding	KNOWN	PHRF1	18.41	15.76	14	17.29
ENSG00000070061	1778.1	0.0673554	1.04779	0.25389	0.265293	0.790783	0.933455	protein_coding	KNOWN	IKBKAP	10.15	12.62	13.03	10.51
ENSG00000070081	1068.56	0.828372	1.77568	0.261731	3.16498	0.00155096	0.0230753	protein_coding	KNOWN	NUCB2	19.55	15.43	31.58	40.32
ENSG00000070087	5201.37	0.0230177	1.01608	0.204164	0.112741	0.910236	0.9749	protein_coding	KNOWN	PFN2	122.13	110.23	124.51	102.83
ENSG00000070159	2143.71	0.390313	1.31068	0.202999	1.92274	0.0545131	0.264445	protein_coding	KNOWN	PTPN3	12.07	12.52	17.94	17.44
ENSG00000070182	358.818	0.406109	1.32511	0.255917	1.58688	0.11254	0.395655	protein_coding	KNOWN	SPTB	1.01	1.25	1.49	1.44
ENSG00000070190	13.3502	1.08839	2.12637	0.988795	1.10072	0.271017	NA	protein_coding	KNOWN	DAPP1	0.14	0.17	0.24	0.18
ENSG00000070214	3312.86	0.273608	1.20883	0.265423	1.03084	0.302618	0.646584	protein_coding	KNOWN	SLC44A1	14.51	18.7	24	13.07
ENSG00000070269	381.914	-0.351456	0.783792	0.263313	-1.33475	0.181958	0.510357	protein_coding	KNOWN	TMEM260	4.8	3.58	3.54	3.43
ENSG00000070366	1338.3	-0.536375	0.689501	0.232008	-2.31189	0.020784	0.144395	protein_coding	KNOWN	SMG6	13	11.69	7.26	10.38
ENSG00000070367	2598.17	-0.237729	0.848079	0.253904	-0.936295	0.349122	0.688432	protein_coding	KNOWN	EXOC5	27.02	29.4	21.57	16.51
ENSG00000070371	243.784	0.353916	1.27803	0.286229	1.23648	0.21628	0.552551	protein_coding	KNOWN	CLTCL1	2.35	1.77	2.22	3.76
ENSG00000070404	926.482	0.191419	1.14189	0.2667	0.717731	0.472923	0.778163	protein_coding	KNOWN	FSTL3	13.16	11.7	11.45	15.97
ENSG00000070413	2628.29	-0.211514	0.863631	0.191817	-1.10268	0.270165	0.613351	protein_coding	KNOWN	DGCR2	20.51	23.74	18.51	17.88
ENSG00000070423	1120.4	0.18191	1.13438	0.26861	0.677228	0.498261	0.796857	protein_coding	KNOWN	RNF126	41.01	25.79	33.13	49.56
ENSG00000070444	808.665	0.032483	1.02277	0.236035	0.137619	0.890541	0.969021	protein_coding	KNOWN	MNT	6.46	5.23	5.57	6.75
ENSG00000070476	495.123	-0.0321429	0.977967	0.268211	-0.119842	0.904608	0.973778	protein_coding	KNOWN	ZXDC	5.64	7.23	6.88	5.21
ENSG00000070495	1737.77	0.557857	1.47208	0.19237	2.89991	0.00373264	0.0438506	protein_coding	KNOWN	JMJD6	29.33	29.91	41.04	44.47
ENSG00000070501	1169.56	-0.126327	0.916161	0.210925	-0.59892	0.549226	0.826708	protein_coding	KNOWN	POLB	51.06	42.98	43.58	40.01
ENSG00000070540	836.923	-0.267231	0.830913	0.219034	-1.22004	0.222449	0.560557	protein_coding	KNOWN	WIPI1	20.64	22.03	18.6	14.98
ENSG00000070601	39.4409	0.826261	1.77308	0.603918	1.36817	0.17126	0.494459	protein_coding	KNOWN	FRMPD1	0.16	0.24	0.34	0.34
ENSG00000070610	2072.65	-0.387593	0.764404	0.203827	-1.90158	0.0572265	0.271255	protein_coding	KNOWN	GBA2	25.57	27.51	20.96	19.52
ENSG00000070614	2646.21	-0.485719	0.714141	0.182683	-2.65881	0.0078417	0.0751583	protein_coding	KNOWN	NDST1	13.05	14.08	10.43	9.11
ENSG00000070669	3144.54	1.04356	2.06131	0.206072	5.06405	4.10439e-07	2.5499e-05	protein_coding	KNOWN	ASNS	38.01	43.84	79.99	86.25
ENSG00000070718	1010.92	0.202034	1.15032	0.201988	1.00023	0.3172	0.660451	protein_coding	KNOWN	AP3M2	12.32	10.39	12.29	12.09
ENSG00000070731	285.832	-0.378455	0.769261	0.322579	-1.17322	0.240709	0.582328	protein_coding	KNOWN	ST6GALNAC2	5.46	6.11	3.47	4.25
ENSG00000070756	105059	-0.112758	0.924818	0.232761	-0.484437	0.628075	0.867005	protein_coding	KNOWN	PABPC1	3110.66	1974.54	1789.58	2659.99
ENSG00000070759	190.746	0.487187	1.40171	0.31294	1.55681	0.119516	0.410035	protein_coding	KNOWN	TESK2	2.39	2.08	3.07	2.65
ENSG00000070761	2053.64	0.0664117	1.04711	0.353742	0.187741	0.85108	0.956416	protein_coding	KNOWN	C16orf80	73.63	42.02	45.77	79.54
ENSG00000070770	3286.98	0.360161	1.28357	0.183361	1.96422	0.049505	0.24946	protein_coding	KNOWN	CSNK2A2	40.21	40.86	45.33	48.34
ENSG00000070778	645.396	-0.53814	0.688658	0.222511	-2.41849	0.0155851	0.12016	protein_coding	KNOWN	PTPN21	4.41	4.19	3.5	2.9
ENSG00000070785	549.852	0.1953	1.14496	0.229027	0.85274	0.393804	0.72357	protein_coding	KNOWN	EIF2B3	11.29	13.14	13.78	13.06
ENSG00000070814	3849.87	0.215116	1.1608	0.22035	0.976247	0.328942	0.669687	protein_coding	KNOWN	TCOF1	26.04	26.48	25.28	33
ENSG00000070831	11564.3	-0.217906	0.859812	0.172013	-1.2668	0.205226	0.538113	protein_coding	KNOWN	CDC42	227.19	209.82	176.72	179.31
ENSG00000070882	3038.3	-0.786619	0.579701	0.1841	-4.27278	1.93054e-05	0.000691586	protein_coding	KNOWN	OSBPL3	28.23	26.8	14.32	16.22
ENSG00000070886	2.23378	-0.0998679	0.933118	2.21423	-0.0451028	0.964025	NA	protein_coding	KNOWN	EPHA8	0.02	0.01	0.04	0.01
ENSG00000070950	790.069	0.481681	1.39637	0.258111	1.86618	0.0620164	0.284731	protein_coding	KNOWN	RAD18	5.74	7.93	10.02	7.95
ENSG00000070961	2563.73	0.283341	1.21701	0.220078	1.28745	0.197936	0.527031	protein_coding	KNOWN	ATP2B1	13.85	17.66	18.2	14.08
ENSG00000071051	1002.22	-0.124064	0.917599	0.210494	-0.589391	0.555599	0.82904	protein_coding	KNOWN	NCK2	20.41	18.51	16.6	16.89
ENSG00000071054	7865.17	-0.378346	0.769319	0.267407	-1.41487	0.157107	0.472589	protein_coding	KNOWN	MAP4K4	86.17	64.99	46.2	65.92
ENSG00000071073	597.889	0.527385	1.44131	0.323908	1.62819	0.103484	0.378436	protein_coding	KNOWN	MGAT4A	2.52	5.5	8.01	4.13
ENSG00000071082	13583.9	0.361824	1.28505	0.41314	0.87579	0.381144	0.714844	protein_coding	KNOWN	RPL31	795.69	1841.23	2251.6	1004.97
ENSG00000071127	11359.3	-0.180631	0.882317	0.196617	-0.918697	0.358254	0.695852	protein_coding	KNOWN	WDR1	229.8	171.42	135.72	193.08
ENSG00000071189	1115.06	-0.032228	0.977909	0.223858	-0.143966	0.885527	0.966845	protein_coding	KNOWN	SNX13	9.86	10.5	10.81	9.36
ENSG00000071205	950.936	-0.239365	0.847118	0.205188	-1.16657	0.243385	0.585761	protein_coding	KNOWN	ARHGAP10	12.24	14.05	10.93	10.89
ENSG00000071242	530.802	0.173869	1.12808	0.228177	0.761993	0.446064	0.762586	protein_coding	KNOWN	RPS6KA2	6.67	3.48	4.35	5.07
ENSG00000071243	387.854	0.0971554	1.06966	0.272847	0.35608	0.721781	0.907992	protein_coding	KNOWN	ING3	6.8	9.1	8.42	8.16
ENSG00000071246	940.728	-0.239919	0.846793	0.218092	-1.10008	0.271297	0.614725	protein_coding	KNOWN	VASH1	6.34	7.17	5.19	6.35
ENSG00000071282	189.041	0.945405	1.92573	0.320929	2.94584	0.00322079	0.0392248	protein_coding	KNOWN	LMCD1	3.67	3.42	5.85	6.91
ENSG00000071462	3105.83	0.0686242	1.04872	0.231153	0.296879	0.766559	0.924327	protein_coding	KNOWN	WBSCR22	149.89	96.27	97.58	150.19
ENSG00000071537	3072.19	0.159185	1.11666	0.18513	0.859852	0.389871	0.721205	protein_coding	KNOWN	SEL1L	14.4	19.02	19.34	17.29
ENSG00000071539	1185.44	0.134486	1.0977	0.240811	0.558472	0.576522	0.841984	protein_coding	KNOWN	TRIP13	17.9	22.15	21.64	15.69
ENSG00000071553	2983.91	-0.105719	0.929342	0.211502	-0.499846	0.617183	0.86278	protein_coding	KNOWN	ATP6AP1	49.02	58.68	52.85	42.71
ENSG00000071564	5306.55	0.224221	1.16815	0.224694	0.997896	0.31833	0.66163	protein_coding	KNOWN	TCF3	81.31	62.08	82.48	109.07
ENSG00000071575	1011.82	0.0820973	1.05856	0.23609	0.347737	0.728037	0.910344	protein_coding	KNOWN	TRIB2	7.81	11.93	13.15	8.96
ENSG00000071626	3571.06	0.185244	1.13701	0.29751	0.622647	0.533516	0.817948	protein_coding	KNOWN	DAZAP1	98.37	58.1	60.92	98.49
ENSG00000071655	1380.55	-0.140761	0.907041	0.282427	-0.498398	0.618204	0.863331	protein_coding	KNOWN	MBD3	15.8	29.51	20.01	18.69
ENSG00000071794	2763.89	0.804396	1.74641	0.240928	3.33873	0.00084161	0.014749	protein_coding	KNOWN	HLTF	13.46	17.53	29.15	20.25
ENSG00000071859	1881.62	0.0599927	1.04246	0.299382	0.200389	0.841177	0.953287	protein_coding	KNOWN	FAM50A	64.19	44.83	40.17	69.52
ENSG00000071889	307.238	0.073096	1.05197	0.278515	0.262449	0.792975	0.934491	protein_coding	KNOWN	FAM3A	6.93	7.13	6.09	7.55
ENSG00000071894	4521.19	0.127687	1.09254	0.190509	0.670241	0.502704	0.798951	protein_coding	KNOWN	CPSF1	57.15	60.28	55.81	79.78
ENSG00000071909	2.56664	2.292	4.89735	2.40307	0.953782	0.340194	NA	protein_coding	KNOWN	MYO3B	0.01	0	0.03	0.02
ENSG00000071967	1403.26	0.20095	1.14945	0.242289	0.829382	0.406888	0.73309	protein_coding	KNOWN	CYBRD1	12.88	11.36	15.53	12.07
ENSG00000071994	2775.22	-0.0920875	0.938164	0.188153	-0.489428	0.624539	0.865467	protein_coding	KNOWN	PDCD2	75.77	89.07	81.6	68.47
ENSG00000072042	3926.19	-0.092209	0.938085	0.185167	-0.497978	0.6185	0.863331	protein_coding	KNOWN	RDH11	58.82	55.38	53.13	51.34
ENSG00000072062	3578.53	-0.638411	0.64242	0.23877	-2.67375	0.00750093	0.0730599	protein_coding	KNOWN	PRKACA	71.89	74.07	45.83	44.74
ENSG00000072071	2273.41	0.36919	1.29163	0.225562	1.63676	0.101681	0.375571	protein_coding	KNOWN	LPHN1	13.95	15.29	17.03	19.06
ENSG00000072110	9565.09	-0.094888	0.936345	0.171576	-0.553038	0.580238	0.843448	protein_coding	KNOWN	ACTN1	112.61	96.91	86.36	94.55
ENSG00000072121	719.613	-0.726444	0.604392	0.227411	-3.19441	0.00140118	0.021401	protein_coding	KNOWN	ZFYVE26	3.53	4.4	2.24	3.18
ENSG00000072134	1800.41	-0.28546	0.82048	0.193424	-1.47582	0.139991	0.447868	protein_coding	KNOWN	EPN2	28.27	20	17.46	17.48
ENSG00000072135	914.291	-0.508752	0.70283	0.339149	-1.50008	0.133593	0.43713	protein_coding	KNOWN	PTPN18	19.82	12.71	9.66	15.37
ENSG00000072163	67.5898	0.246127	1.18602	0.475797	0.517294	0.604951	0.856615	protein_coding	KNOWN	LIMS2	1.4	1.37	1.28	2.04
ENSG00000072182	3.78698	-0.910013	0.53218	1.76444	-0.51575	0.606029	NA	protein_coding	KNOWN	ASIC4	0.1	0.04	0.03	0.07
ENSG00000072195	446.349	0.312205	1.2416	0.287309	1.08665	0.277191	0.620509	protein_coding	KNOWN	SPEG	7.77	7.94	6.97	9.05
ENSG00000072201	127.345	-0.272825	0.827697	0.360153	-0.757525	0.448735	0.76422	protein_coding	KNOWN	LNX1	1.62	1.87	2	2.02
ENSG00000072210	2267.58	-0.501029	0.706603	0.215957	-2.32004	0.0203386	0.142031	protein_coding	KNOWN	ALDH3A2	29.43	35.27	25.59	21.62
ENSG00000072274	8104.85	0.198386	1.14741	0.309932	0.640094	0.522112	0.811429	protein_coding	KNOWN	TFRC	44.27	60.92	77.98	40.22
ENSG00000072310	3260.98	0.0107184	1.00746	0.180732	0.0593059	0.952708	0.986616	protein_coding	KNOWN	SREBF1	71.32	61.71	65.3	82.16
ENSG00000072364	2198.81	0.304003	1.23457	0.19622	1.5493	0.121311	0.412911	protein_coding	KNOWN	AFF4	14.61	8.36	10.55	11.53
ENSG00000072401	670.545	-0.217453	0.860083	0.250495	-0.868094	0.385343	0.718682	protein_coding	KNOWN	UBE2D1	16.71	18.34	16.9	12.33
ENSG00000072415	1186.22	-0.2328	0.850981	0.21529	-1.08133	0.279549	0.623226	protein_coding	KNOWN	MPP5	8.13	8.85	8.24	5.99
ENSG00000072422	152.209	0.424432	1.34204	0.338317	1.25454	0.209645	0.544012	protein_coding	KNOWN	RHOBTB1	1.04	1.23	2.21	1.73
ENSG00000072444	19.5357	-0.174641	0.885988	0.879439	-0.198583	0.842589	NA	protein_coding	KNOWN	ASAH2C	0.22	0.11	0.1	0.18
ENSG00000072501	4754.64	0.681587	1.6039	0.209191	3.25821	0.00112119	0.0182567	protein_coding	KNOWN	SMC1A	25	24.41	36.72	44.37
ENSG00000072506	2271.28	-0.190336	0.876402	0.188388	-1.01034	0.312333	0.655787	protein_coding	KNOWN	HSD17B10	101.46	107.1	85.3	91.37
ENSG00000072518	2039.94	-0.397999	0.75891	0.186331	-2.13598	0.0326808	0.194282	protein_coding	KNOWN	MARK2	21.73	21.39	15.48	14.3
ENSG00000072571	2370.74	1.12679	2.18373	0.231122	4.87532	1.08635e-06	6.01724e-05	protein_coding	KNOWN	HMMR	27.46	18.63	45.52	59.31
ENSG00000072657	387.718	0.157325	1.11522	0.271689	0.579062	0.562547	0.834105	protein_coding	KNOWN	TRHDE	3.44	2	2.62	2.2
ENSG00000072682	3138.92	0.213342	1.15937	0.180185	1.18401	0.236408	0.57754	protein_coding	KNOWN	P4HA2	50.22	48.6	52.82	55.86
ENSG00000072736	1406.33	-0.591808	0.663511	0.212606	-2.78359	0.00537604	0.0573444	protein_coding	KNOWN	NFATC3	11.02	11.9	6.91	7.84
ENSG00000072756	787.942	0.00519654	1.00361	0.235064	0.0221069	0.982363	0.995968	protein_coding	KNOWN	TRNT1	19.54	14.01	14.26	14.45
ENSG00000072778	3495.64	-0.165912	0.891365	0.218807	-0.758255	0.448298	0.76422	protein_coding	KNOWN	ACADVL	121.06	90.8	75.1	113.54
ENSG00000072786	1436.82	-0.393142	0.76147	0.199421	-1.97142	0.0486762	0.247089	protein_coding	KNOWN	STK10	17.02	13.94	12.43	12.93
ENSG00000072803	1931.07	-1.16642	0.445525	0.228715	-5.09988	3.39862e-07	2.13063e-05	protein_coding	KNOWN	FBXW11	24.61	28.22	12.5	10.71
ENSG00000072818	29.5023	1.61605	3.06535	0.684941	2.3594	0.0183045	0.132731	protein_coding	KNOWN	ACAP1	0.71	1.33	2.43	3.98
ENSG00000072849	926.07	0.147902	1.10796	0.240828	0.614141	0.539122	0.821496	protein_coding	KNOWN	DERL2	29.73	34.67	40.44	29.65
ENSG00000072864	1551.46	0.485419	1.39999	0.198495	2.4455	0.014465	0.113806	protein_coding	KNOWN	NDE1	25.73	32.49	38.51	36.26
ENSG00000072952	225.681	0.0927927	1.06643	0.293707	0.315936	0.752051	0.919122	protein_coding	KNOWN	MRVI1	1.44	1.27	1.4	1.37
ENSG00000072954	513.814	-0.826253	0.563992	0.237446	-3.47976	0.000501868	0.00994506	protein_coding	KNOWN	TMEM38A	8.94	10.2	5.6	4.98
ENSG00000072958	1700.89	-0.134839	0.910771	0.198382	-0.679697	0.496696	0.795847	protein_coding	KNOWN	AP1M1	28.34	30.05	24.95	24.3
ENSG00000073008	3615.66	0.00232159	1.00161	0.22021	0.0105426	0.991588	0.998816	protein_coding	KNOWN	PVR	38.79	34.7	33.42	38.37
ENSG00000073009	481.9	0.00809433	1.00563	0.233919	0.0346031	0.972396	0.993143	protein_coding	KNOWN	IKBKG	9.19	8.38	9.02	9.18
ENSG00000073050	1187.81	0.277873	1.21241	0.28132	0.987749	0.323276	0.666161	protein_coding	KNOWN	XRCC1	23.71	14.43	15.84	27.78
ENSG00000073060	4493.31	-0.280243	0.823452	0.182798	-1.53308	0.125256	0.420336	protein_coding	KNOWN	SCARB1	70.87	73.55	58.24	60.3
ENSG00000073111	4997.19	-0.0531654	0.963819	0.200786	-0.264787	0.791174	0.933516	protein_coding	KNOWN	MCM2	45.26	54.13	50.11	41.88
ENSG00000073150	145.194	-0.0312477	0.978574	0.355981	-0.0877791	0.930052	0.980171	protein_coding	KNOWN	PANX2	1.69	1.74	1.4	1.81
ENSG00000073169	223.783	0.281303	1.21529	0.291586	0.964732	0.334679	0.676897	protein_coding	KNOWN	SELO	3.93	4.1	4.82	5.17
ENSG00000073331	301.543	0.85959	1.81452	0.269968	3.18404	0.00145234	0.0220117	protein_coding	KNOWN	ALPK1	2.07	2.08	3.57	3.3
ENSG00000073350	3091.85	0.168143	1.12361	0.18291	0.919262	0.357959	0.695739	protein_coding	KNOWN	LLGL2	49.18	59.04	62.44	59.99
ENSG00000073417	596.594	0.145629	1.10621	0.23948	0.608106	0.543117	0.823785	protein_coding	KNOWN	PDE8A	6.06	4.91	6.29	5.72
ENSG00000073464	233.997	-0.118046	0.921435	0.308707	-0.382389	0.702173	0.901126	protein_coding	KNOWN	CLCN4	1.51	1.29	1.26	0.92
ENSG00000073536	1092.67	-0.191844	0.875486	0.259117	-0.740375	0.459072	0.770259	protein_coding	KNOWN	NLE1	12.02	18	15.95	12.78
ENSG00000073578	4591.71	-0.112639	0.924895	0.205676	-0.547653	0.58393	0.845696	protein_coding	KNOWN	SDHA	76.9	81.44	71.39	74.92
ENSG00000073584	6806.12	-0.118345	0.921244	0.253411	-0.467007	0.640495	0.87147	protein_coding	KNOWN	SMARCE1	215.31	141.96	119.86	191.17
ENSG00000073605	86.0769	0.92054	1.89282	0.490674	1.87607	0.0606453	0.280961	protein_coding	KNOWN	GSDMB	0.75	0.41	1.04	2.1
ENSG00000073614	1410.22	-0.0370011	0.974679	0.254205	-0.145556	0.884272	0.966389	protein_coding	KNOWN	KDM5A	7.99	8.22	7.58	8.44
ENSG00000073670	270.538	0.085133	1.06079	0.275739	0.308745	0.757515	0.920868	protein_coding	KNOWN	ADAM11	1.97	2	1.96	2.29
ENSG00000073711	565.139	-0.110022	0.926574	0.229183	-0.480062	0.631184	0.867925	protein_coding	KNOWN	PPP2R3A	3.23	3.53	3.4	2.86
ENSG00000073712	1241.9	1.38396	2.60983	0.227121	6.09348	1.10479e-09	1.28044e-07	protein_coding	KNOWN	FERMT2	12.26	6.89	17.94	25.47
ENSG00000073756	38.8537	-0.890695	0.539354	0.614162	-1.45026	0.146986	0.459585	protein_coding	KNOWN	PTGS2	0.39	0.6	0.24	0.2
ENSG00000073792	6985.67	0.00531648	1.00369	0.257018	0.0206853	0.983497	0.996384	protein_coding	KNOWN	IGF2BP2	78.41	63.18	56.36	79.8
ENSG00000073803	766.806	-0.0701232	0.952557	0.221136	-0.317104	0.751165	0.919021	protein_coding	KNOWN	MAP3K13	17.54	15.46	16.27	13.61
ENSG00000073849	1634.56	-0.00296782	0.997945	0.197076	-0.0150593	0.987985	0.997719	protein_coding	KNOWN	ST6GAL1	14.06	12.67	13.66	12.94
ENSG00000073905	20.6413	-0.210379	0.86431	0.787498	-0.267149	0.789354	NA	pseudogene	KNOWN	VDAC1P1	0.98	1.23	0.98	0.89
ENSG00000073910	66.3275	0.604471	1.52042	0.471044	1.28326	0.199402	0.529895	protein_coding	KNOWN	FRY	0.19	0.54	0.36	0.73
ENSG00000073921	3892.25	0.121519	1.08788	0.18	0.675106	0.499608	0.797521	protein_coding	KNOWN	PICALM	85.18	52.45	56.52	70.02
ENSG00000073969	3298.4	-0.755118	0.592498	0.182597	-4.13543	3.54292e-05	0.00115637	protein_coding	KNOWN	NSF	40.03	38.72	22.96	23.09
ENSG00000074047	235.438	-0.108298	0.927682	0.2851	-0.379859	0.70405	0.902069	protein_coding	KNOWN	GLI2	2.38	2.27	1.36	1.83
ENSG00000074054	2268.05	-0.289044	0.818444	0.20243	-1.42787	0.153329	0.467754	protein_coding	KNOWN	CLASP1	11.1	14.31	10.51	8.31
ENSG00000074071	3221.96	0.268987	1.20496	0.261865	1.02719	0.304329	0.648411	protein_coding	KNOWN	MRPS34	164.75	131.41	145.73	189.1
ENSG00000074181	2072.49	-0.448148	0.732983	0.220058	-2.0365	0.0417001	0.225363	protein_coding	KNOWN	NOTCH3	9.34	13.91	11.52	6.75
ENSG00000074201	3712.58	-0.163401	0.892917	0.216039	-0.75635	0.449439	0.764437	protein_coding	KNOWN	CLNS1A	190.61	132.69	120.82	156.98
ENSG00000074211	1488.88	0.36467	1.28759	0.193464	1.88495	0.0594372	0.277226	protein_coding	KNOWN	PPP2R2C	15.16	13.99	16.82	19.46
ENSG00000074219	1989.7	-0.352972	0.78297	0.257104	-1.37287	0.169791	0.492795	protein_coding	KNOWN	TEAD2	54.82	34.01	25.88	44.13
ENSG00000074266	706.648	0.494082	1.40842	0.332744	1.48487	0.137578	0.443509	protein_coding	KNOWN	EED	7.78	14.1	18.74	11.59
ENSG00000074276	7.07414	-0.926275	0.526215	1.43464	-0.64565	0.518506	NA	protein_coding	KNOWN	CDHR2	0.21	0.85	0.17	0.12
ENSG00000074319	2770.52	-0.0592368	0.959772	0.222864	-0.265798	0.790395	0.933341	protein_coding	KNOWN	TSG101	120.75	81.44	84.23	105.63
ENSG00000074356	1127.09	-0.185651	0.879252	0.203193	-0.913665	0.360893	0.697905	protein_coding	KNOWN	C17orf85	16.95	15.32	14.93	14.18
ENSG00000074370	916.421	-0.45512	0.72945	0.208632	-2.18145	0.0291505	0.18107	protein_coding	KNOWN	ATP2A3	7.54	8.38	5.51	5.75
ENSG00000074410	152.053	1.18295	2.27041	0.349877	3.38106	0.000722061	0.0132959	protein_coding	KNOWN	CA12	1	1.04	1.75	1.48
ENSG00000074416	344.038	0.462748	1.37816	0.283847	1.63027	0.103044	0.377874	protein_coding	KNOWN	MGLL	2.28	2.72	4.09	2.98
ENSG00000074527	181.934	0.087161	1.06228	0.347523	0.250806	0.801964	0.93865	protein_coding	KNOWN	NTN4	2.46	1.66	2.37	1.96
ENSG00000074582	641.913	0.143377	1.10449	0.229385	0.625048	0.53194	0.816532	protein_coding	KNOWN	BCS1L	20.21	20.93	21.5	21.85
ENSG00000074590	947.092	0.46446	1.3798	0.242184	1.9178	0.0551367	0.266452	protein_coding	KNOWN	NUAK1	3.48	4.45	5.93	4.62
ENSG00000074603	1185.27	-0.0168332	0.9884	0.234377	-0.071821	0.942744	0.9851	protein_coding	KNOWN	DPP8	7.24	9.21	10.18	8.66
ENSG00000074621	272.216	-0.471019	0.721455	0.296116	-1.59066	0.111687	0.394371	protein_coding	KNOWN	SLC24A1	3.01	4.25	2.41	2.32
ENSG00000074657	702.505	0.238915	1.1801	0.216545	1.10331	0.269895	0.613041	protein_coding	KNOWN	ZNF532	5.04	5.13	6.36	4.74
ENSG00000074660	14.0436	-0.168593	0.88971	0.936192	-0.180083	0.857087	NA	protein_coding	KNOWN	SCARF1	0.16	0.15	0.12	0.14
ENSG00000074695	5147.04	0.617307	1.53401	0.195805	3.15267	0.00161785	0.0238391	protein_coding	KNOWN	LMAN1	25.2	25.68	41.86	33.21
ENSG00000074696	5400.19	0.289389	1.22212	0.179676	1.61061	0.107264	0.386263	protein_coding	KNOWN	PTPLAD1	52.51	53.79	66.48	58.56
ENSG00000074755	905.087	-0.450619	0.731729	0.250057	-1.80206	0.0715357	0.308319	protein_coding	KNOWN	ZZEF1	3.49	4.57	3.3	2.16
ENSG00000074800	120471	0.504251	1.41839	0.17639	2.85873	0.00425346	0.0482035	protein_coding	KNOWN	ENO1	1940.92	2218.2	2865.25	2822.43
ENSG00000074842	2688.85	0.479547	1.39431	0.212829	2.2532	0.0242463	0.160694	protein_coding	KNOWN	C19orf10	78.09	100.87	117.29	123.01
ENSG00000074855	420.908	-0.168071	0.890032	0.253834	-0.662131	0.507887	0.802605	protein_coding	KNOWN	ANO8	3.48	4	3.5	2.94
ENSG00000074935	374.576	0.246005	1.18592	0.269006	0.914497	0.360456	0.697868	protein_coding	KNOWN	TUBE1	11.09	7.05	7.05	11.53
ENSG00000074964	420.615	0.264738	1.20142	0.240117	1.10253	0.270229	0.613359	protein_coding	KNOWN	ARHGEF10L	3.03	3.34	3.6	3.83
ENSG00000074966	29.613	-0.320825	0.800612	0.694695	-0.461821	0.644209	0.872783	protein_coding	KNOWN	TXK	0.55	0.64	0.54	0.45
ENSG00000075043	1223.82	-0.128551	0.91475	0.1963	-0.654868	0.512553	0.804409	protein_coding	KNOWN	KCNQ2	29.4	30.32	27.57	25.95
ENSG00000075089	731.202	0.0757503	1.05391	0.260051	0.29129	0.770829	0.925224	protein_coding	KNOWN	ACTR6	12.77	17.28	18.13	13.13
ENSG00000075131	501.288	-0.494535	0.709791	0.24737	-1.99917	0.0455897	0.238624	protein_coding	KNOWN	TIPIN	19.82	14.41	11.31	11.26
ENSG00000075142	1960.77	0.315831	1.24473	0.199188	1.58559	0.112832	0.396276	protein_coding	KNOWN	SRI	83.5	83.07	98.69	124.44
ENSG00000075151	2281.58	-0.585947	0.666212	0.214417	-2.73274	0.00628092	0.0639865	protein_coding	KNOWN	EIF4G3	29.24	18.7	12.62	16.4
ENSG00000075188	1333.14	0.367346	1.28998	0.256207	1.43379	0.151633	0.465881	protein_coding	KNOWN	NUP37	30.5	40.04	51.74	36.44
ENSG00000075213	2778.79	-0.340392	0.789827	0.200954	-1.69388	0.0902884	0.352557	protein_coding	KNOWN	SEMA3A	29.89	22.31	19.47	21.46
ENSG00000075218	1239.95	0.441731	1.35823	0.215558	2.04925	0.0404378	0.221054	protein_coding	KNOWN	GTSE1	12.41	11.78	14.74	16.79
ENSG00000075223	766.253	-0.730019	0.602896	0.248121	-2.94219	0.00325904	0.0395327	protein_coding	KNOWN	SEMA3C	7.44	7.89	5.1	3.82
ENSG00000075234	1031.59	-0.12051	0.919862	0.230879	-0.521963	0.601696	0.855525	protein_coding	KNOWN	TTC38	16.19	17.11	16.17	12.17
ENSG00000075239	2547.59	0.185916	1.13754	0.187635	0.99084	0.321764	0.665033	protein_coding	KNOWN	ACAT1	65.29	52.74	56.19	72.36
ENSG00000075240	579.527	-0.471705	0.721112	0.237862	-1.98311	0.0473553	0.243602	protein_coding	KNOWN	GRAMD4	8.31	8.13	4.88	4.55
ENSG00000075275	1341.24	-0.111812	0.925425	0.200469	-0.557753	0.577013	0.841984	protein_coding	KNOWN	CELSR1	6.43	6.15	5.1	6.16
ENSG00000075290	2.36899	-0.223748	0.856338	2.96437	-0.0754791	0.939834	NA	protein_coding	KNOWN	WNT8B	0.09	0	0.07	0
ENSG00000075292	3208.65	-0.146051	0.903721	0.182394	-0.800746	0.423279	0.74497	protein_coding	KNOWN	ZNF638	52.94	39.84	38.45	54.91
ENSG00000075303	853.634	0.118543	1.08564	0.233321	0.508068	0.611406	0.859934	protein_coding	KNOWN	SLC25A40	9.75	11.48	13.32	9.32
ENSG00000075336	753.382	0.0460238	1.03242	0.249811	0.184234	0.85383	0.957314	protein_coding	KNOWN	TIMM21	22.45	17.92	16.49	20.93
ENSG00000075391	752.215	-0.199352	0.870942	0.245725	-0.811282	0.417203	0.740454	protein_coding	KNOWN	RASAL2	3.88	3.04	3.06	2.12
ENSG00000075399	173.912	-0.294899	0.81513	0.342087	-0.862058	0.388655	0.720669	protein_coding	KNOWN	VPS9D1	3.41	3.21	1.88	3.68
ENSG00000075407	809.948	-0.614189	0.653297	0.22217	-2.7645	0.00570103	0.059976	protein_coding	KNOWN	ZNF37A	5.46	4.96	3.97	3.34
ENSG00000075413	2160.38	0.228104	1.17129	0.196137	1.16299	0.244835	0.586976	protein_coding	KNOWN	MARK3	27.81	26.82	30.78	31.94
ENSG00000075415	16463.4	-0.207141	0.866252	0.298507	-0.693922	0.487731	0.788141	protein_coding	KNOWN	SLC25A3	369.76	645.61	531.15	325.63
ENSG00000075420	1943.36	-0.101969	0.93176	0.212701	-0.479402	0.631653	0.868074	protein_coding	KNOWN	FNDC3B	22.4	11.04	10.55	13.43
ENSG00000075426	1166.82	-0.252089	0.83968	0.215315	-1.17079	0.241684	0.583766	protein_coding	KNOWN	FOSL2	6.43	8.17	9.19	6.52
ENSG00000075539	2855.87	-0.386381	0.765046	0.229589	-1.68293	0.092389	0.356727	protein_coding	KNOWN	FRYL	13.47	15.19	13.42	10.83
ENSG00000075568	4093.05	-0.629849	0.646244	0.201548	-3.12506	0.00177771	0.025388	protein_coding	KNOWN	TMEM131	30.92	26.66	18.05	16.43
ENSG00000075618	10233	-0.0451713	0.969175	0.191604	-0.235754	0.813624	0.942225	protein_coding	KNOWN	FSCN1	133.19	158.03	143.78	128.65
ENSG00000075624	81232.8	-0.228466	0.853542	0.1714	-1.33294	0.182551	0.511009	protein_coding	KNOWN	ACTB	2284.04	1882.31	1482.26	2011.45
ENSG00000075643	718.167	-0.496312	0.708917	0.277875	-1.7861	0.0740831	0.314915	protein_coding	KNOWN	MOCOS	4.53	5.63	5.04	2.94
ENSG00000075651	821.858	-0.537919	0.688764	0.232734	-2.31131	0.020816	0.144413	protein_coding	KNOWN	PLD1	10.08	8.92	6.29	4.79
ENSG00000075673	11.157	0.434153	1.35112	1.1004	0.394541	0.693182	NA	protein_coding	KNOWN	ATP12A	0.12	0.06	0.16	0.09
ENSG00000075702	732.303	0.666045	1.58672	0.236722	2.81362	0.00489876	0.0537072	protein_coding	KNOWN	WDR62	4.4	4.21	6.03	7.56
ENSG00000075711	2037.02	0.272328	1.20776	0.188405	1.44544	0.148334	0.461827	protein_coding	KNOWN	DLG1	22.92	19.09	23.88	23.11
ENSG00000075785	8842.53	-0.0924864	0.937905	0.262959	-0.351714	0.725053	0.909074	protein_coding	KNOWN	RAB7A	302.41	131.07	131.21	207.8
ENSG00000075790	1064.13	-0.0579798	0.960608	0.215857	-0.268602	0.788236	0.933064	protein_coding	KNOWN	BCAP29	37.76	27.59	25.38	34.06
ENSG00000075826	39.0346	0.992933	1.99023	0.760115	1.30629	0.191453	0.521529	protein_coding	KNOWN	SEC31B	0.7	0.22	0.56	1.05
ENSG00000075856	2680.98	-0.250028	0.84088	0.194105	-1.2881	0.19771	0.527022	protein_coding	KNOWN	SART3	57.02	28.86	24.14	43.62
ENSG00000075891	163.661	0.315038	1.24404	0.42327	0.744294	0.456698	0.769466	protein_coding	KNOWN	PAX2	1.41	1.5	1.17	2.21
ENSG00000075914	1310.21	0.483311	1.39795	0.252265	1.91589	0.0553791	0.267059	protein_coding	KNOWN	EXOSC7	34.74	46.57	64.59	47.5
ENSG00000075945	673.022	-0.0954163	0.936002	0.241143	-0.395684	0.692338	0.89621	protein_coding	KNOWN	KIFAP3	7.36	9.86	9.19	7.16
ENSG00000075975	1046.29	0.135681	1.09861	0.261142	0.519568	0.603364	0.85611	protein_coding	KNOWN	MKRN2	10.54	14.39	15.26	11.04
ENSG00000076003	4365.79	0.144464	1.10532	0.2253	0.641205	0.52139	0.811054	protein_coding	KNOWN	MCM6	34.15	43.33	46.85	35.89
ENSG00000076043	1566.79	-0.374371	0.771442	0.216019	-1.73304	0.0830877	0.336474	protein_coding	KNOWN	REXO2	74.12	57.49	44.38	53.37
ENSG00000076053	1550.61	0.119181	1.08612	0.21323	0.558931	0.576209	0.841984	protein_coding	KNOWN	RBM7	33.48	25.78	31.07	30.29
ENSG00000076067	976.506	-0.864764	0.549136	0.204055	-4.2379	2.25618e-05	0.000786018	protein_coding	KNOWN	RBMS2	28.64	14.57	9.13	13.54
ENSG00000076108	6910.19	-0.281375	0.822807	0.212678	-1.32301	0.185833	0.514971	protein_coding	KNOWN	BAZ2A	80.79	36.22	26.61	61.41
ENSG00000076201	2730.31	-0.204599	0.86778	0.201	-1.01791	0.308722	0.65185	protein_coding	KNOWN	PTPN23	20.69	18.7	16.18	17.63
ENSG00000076242	92.453	0.00849529	1.00591	0.420428	0.0202063	0.983879	0.99643	protein_coding	KNOWN	MLH1	3.94	2.42	2.71	2.13
ENSG00000076248	4066.94	0.170606	1.12553	0.189885	0.89847	0.368935	0.70427	protein_coding	KNOWN	UNG	63.53	69.57	78.27	66.77
ENSG00000076258	59.1548	0.0384641	1.02702	0.484658	0.0793633	0.936744	0.98304	protein_coding	KNOWN	FMO4	0.97	1.22	1.38	1.05
ENSG00000076321	521.274	-0.60145	0.659091	0.233109	-2.58012	0.00987649	0.0876555	protein_coding	KNOWN	KLHL20	10.26	9.73	6.55	5.89
ENSG00000076351	778.084	-0.691261	0.619312	0.215022	-3.21484	0.00130516	0.0204322	protein_coding	KNOWN	SLC46A1	8.08	5.53	4.18	4.85
ENSG00000076356	98.8088	-0.555203	0.680561	0.401289	-1.38355	0.166497	0.486953	protein_coding	KNOWN	PLXNA2	0.58	0.31	0.23	0.43
ENSG00000076382	2668.13	0.852936	1.80617	0.187736	4.54327	5.53874e-06	0.00024642	protein_coding	KNOWN	SPAG5	17.55	19.31	30.45	32.06
ENSG00000076513	558.612	0.119438	1.08631	0.229995	0.519305	0.603548	0.856216	protein_coding	KNOWN	ANKRD13A	6.89	6.21	6.57	5.74
ENSG00000076554	3543.64	0.136889	1.09953	0.189362	0.722896	0.469744	0.776717	protein_coding	KNOWN	TPD52	61.73	90.23	102.51	55.34
ENSG00000076555	283.654	0.0230617	1.01611	0.27274	0.0845557	0.932615	0.980906	protein_coding	KNOWN	ACACB	2.22	1.79	1.84	2.4
ENSG00000076604	3184.96	-0.501832	0.706209	0.195433	-2.56779	0.0102349	0.0900829	protein_coding	KNOWN	TRAF4	79.12	67.53	45.92	60.91
ENSG00000076641	78.1272	0.744862	1.67581	0.471753	1.57892	0.114354	0.399559	protein_coding	KNOWN	PAG1	0.78	1.18	1.21	0.69
ENSG00000076650	335.296	0.367498	1.29011	0.264687	1.38842	0.165008	0.48514	protein_coding	KNOWN	GPATCH1	2.84	3.04	3.41	3.97
ENSG00000076662	347.977	0.0933572	1.06685	0.262882	0.35513	0.722492	0.908314	protein_coding	KNOWN	ICAM3	9.42	8.82	7.7	10.48
ENSG00000076685	2593.04	-0.097944	0.934364	0.197793	-0.495184	0.62047	0.863978	protein_coding	KNOWN	NT5C2	36.09	37.38	37.2	30.27
ENSG00000076706	1342.23	0.253048	1.19172	0.234102	1.08093	0.279728	0.623226	protein_coding	KNOWN	MCAM	17.75	13.46	15.58	20.23
ENSG00000076716	1713.75	0.527421	1.44135	0.202216	2.60821	0.00910175	0.0832135	protein_coding	KNOWN	GPC4	14.7	16.65	22.05	18.62
ENSG00000076770	577.895	0.887196	1.84958	0.25656	3.45805	0.000544104	0.0106044	protein_coding	KNOWN	MBNL3	1.52	2.45	3.45	2.76
ENSG00000076826	931.002	0.370386	1.2927	0.312707	1.18445	0.236235	0.57754	protein_coding	KNOWN	CAMSAP3	9.71	6.78	7.16	13.55
ENSG00000076864	558.934	0.223413	1.16749	0.226879	0.984725	0.324759	0.666629	protein_coding	KNOWN	RAP1GAP	7.65	5.51	6.57	8.05
ENSG00000076924	4457.76	0.32162	1.24973	0.181445	1.77255	0.0763029	0.319675	protein_coding	KNOWN	XAB2	51.11	54.4	61.71	65.41
ENSG00000076928	2124.86	0.0777131	1.05534	0.19117	0.406513	0.684366	0.891549	protein_coding	KNOWN	ARHGEF1	26.18	32.07	31.52	30.9
ENSG00000076944	2903.58	0.169264	1.12448	0.230746	0.733548	0.463224	0.772993	protein_coding	KNOWN	STXBP2	60.37	59.51	53.52	73.45
ENSG00000076984	1608.78	0.096841	1.06943	0.219863	0.44046	0.659604	0.880981	protein_coding	KNOWN	MAP2K7	16.44	16.42	15.19	18.81
ENSG00000077044	1803.25	0.0162151	1.0113	0.209827	0.0772784	0.938402	0.983643	protein_coding	KNOWN	DGKD	9.29	11.29	11.65	9.41
ENSG00000077063	249.071	0.145542	1.10615	0.285988	0.50891	0.610816	0.859512	protein_coding	KNOWN	CTTNBP2	1.69	2.02	1.87	1.6
ENSG00000077092	4.12938	0.384433	1.30535	1.74115	0.220793	0.825254	NA	protein_coding	KNOWN	RARB	0.07	0.07	0.03	0.09
ENSG00000077097	4264.54	0.129197	1.09368	0.17721	0.729061	0.465964	0.774287	protein_coding	KNOWN	TOP2B	37.18	36.03	40.98	42.29
ENSG00000077147	4171.71	0.218898	1.16384	0.195661	1.11876	0.263243	0.60622	protein_coding	KNOWN	TM9SF3	27.42	36.54	43.09	32.06
ENSG00000077150	4165.29	0.445	1.36131	0.179052	2.48531	0.0129439	0.105697	protein_coding	KNOWN	NFKB2	46.77	51.15	68.47	63.77
ENSG00000077152	1502.48	0.608232	1.52439	0.201252	3.02224	0.00250911	0.0327396	protein_coding	KNOWN	UBE2T	55.97	52.52	85.25	74.43
ENSG00000077157	349.387	0.24109	1.18189	0.255885	0.942181	0.3461	0.685736	protein_coding	KNOWN	PPP1R12B	2.57	1.23	2.24	3.21
ENSG00000077232	2873.85	-0.526608	0.694185	0.188977	-2.78663	0.00532599	0.0569221	protein_coding	KNOWN	DNAJC10	22.75	27.22	19.23	15.09
ENSG00000077235	5941.93	-0.479826	0.717064	0.179345	-2.67543	0.00746334	0.0728801	protein_coding	KNOWN	GTF3C1	52.22	55.98	38.91	46.34
ENSG00000077238	1100.77	-0.25274	0.839301	0.247277	-1.0221	0.306736	0.650693	protein_coding	KNOWN	IL4R	12.88	12.82	9.39	13.14
ENSG00000077254	2368.47	0.2961	1.22782	0.232101	1.27574	0.202048	0.53452	protein_coding	KNOWN	USP33	19.35	22.68	31.14	21.16
ENSG00000077274	183.616	0.767706	1.70256	0.337263	2.27628	0.0228291	0.154067	protein_coding	KNOWN	CAPN6	1.46	1.19	1.97	2.38
ENSG00000077312	3167.1	0.489414	1.40388	0.272773	1.79422	0.0727784	0.31192	protein_coding	KNOWN	SNRPA	99.6	62.45	77.28	166.32
ENSG00000077348	1127.02	-0.0665682	0.954907	0.201179	-0.33089	0.740728	0.915762	protein_coding	KNOWN	EXOSC5	46.24	40.49	36.84	42.82
ENSG00000077380	2571.3	0.0793512	1.05654	0.190296	0.416989	0.676687	0.889013	protein_coding	KNOWN	DYNC1I2	36.23	33.81	34.98	36.55
ENSG00000077454	1067.29	0.443999	1.36037	0.297534	1.49226	0.13563	0.440455	protein_coding	KNOWN	LRCH4	13.93	11.24	13.09	19.78
ENSG00000077458	256.701	0.0111931	1.00779	0.344775	0.0324649	0.974101	0.993607	protein_coding	KNOWN	FAM76B	5.76	3.7	4.41	5.65
ENSG00000077463	655.055	0.161259	1.11826	0.253702	0.635623	0.525022	0.813059	protein_coding	KNOWN	SIRT6	15.87	14.11	14.31	19.03
ENSG00000077514	468.669	0.0569194	1.04024	0.237337	0.239825	0.810466	0.940746	protein_coding	KNOWN	POLD3	4.64	4.86	4.81	5.58
ENSG00000077522	13.0086	0.741736	1.67219	1.08953	0.680787	0.496006	NA	protein_coding	KNOWN	ACTN2	0.33	0.16	0.43	0.64
ENSG00000077549	7048.51	0.275412	1.21034	0.223745	1.23092	0.218353	0.555295	protein_coding	KNOWN	CAPZB	151.7	151.77	160.21	185.91
ENSG00000077585	647.998	-0.326405	0.797521	0.226425	-1.44156	0.149428	0.463567	protein_coding	KNOWN	GPR137B	18	13.29	10.66	13.28
ENSG00000077616	20.2103	-1.09696	0.467501	0.847656	-1.29411	0.195628	NA	protein_coding	KNOWN	NAALAD2	0.26	0.27	0.17	0.08
ENSG00000077684	892.219	0.391876	1.3121	0.222849	1.75848	0.078666	0.325521	protein_coding	KNOWN	PHF17	5.55	7.84	8.94	7.68
ENSG00000077713	691.221	0.0840734	1.06001	0.240077	0.350194	0.726193	0.909631	protein_coding	KNOWN	SLC25A43	9.43	7.69	9.57	8.5
ENSG00000077721	2301.57	0.103636	1.07448	0.210996	0.491173	0.623304	0.865467	protein_coding	KNOWN	UBE2A	60.41	47.67	53.54	62.33
ENSG00000077782	1140.83	0.307393	1.23747	0.200127	1.53599	0.124542	0.418639	protein_coding	KNOWN	FGFR1	17.31	13.41	12.4	15.79
ENSG00000077809	8208.81	-0.39967	0.758032	0.178279	-2.24182	0.0249729	0.164091	protein_coding	KNOWN	GTF2I	73.14	80.9	57.6	54.08
ENSG00000077935	6.24105	0.771486	1.70703	1.39253	0.554016	0.579568	NA	protein_coding	KNOWN	SMC1B	0.04	0.04	0.05	0.09
ENSG00000077942	1421.66	0.922987	1.89604	0.22455	4.11039	3.94993e-05	0.00126692	protein_coding	KNOWN	FBLN1	14.41	14.28	23.07	29.31
ENSG00000077984	4.58056	0.972966	1.96287	2.48184	0.392034	0.695033	NA	protein_coding	KNOWN	CST7	0	0.28	0.53	0
ENSG00000078018	437.159	-0.155236	0.897986	0.258758	-0.599926	0.548556	0.826579	protein_coding	KNOWN	MAP2	5.16	4.1	3.64	3.96
ENSG00000078043	1042.78	-0.13808	0.908728	0.209712	-0.658425	0.510265	0.803611	protein_coding	KNOWN	PIAS2	16.41	12.37	13.4	12.75
ENSG00000078061	1745.96	0.0564474	1.0399	0.229028	0.246465	0.805322	0.938965	protein_coding	KNOWN	ARAF	27.86	27.19	25.75	31.04
ENSG00000078070	273.087	-0.391304	0.76244	0.273127	-1.43268	0.151949	0.466537	protein_coding	KNOWN	MCCC1	5.32	5.17	4.19	4.26
ENSG00000078081	441.365	-1.37443	0.385705	0.306452	-4.48498	7.29222e-06	0.000317269	protein_coding	KNOWN	LAMP3	13.22	5.33	2.39	3.74
ENSG00000078114	1282.05	-0.478496	0.717726	0.299894	-1.59555	0.11059	0.392398	protein_coding	KNOWN	NEBL	10.75	12.11	10.15	6.91
ENSG00000078124	1218.1	0.114665	1.08272	0.235632	0.486628	0.626522	0.866004	protein_coding	KNOWN	ACER3	12.12	10.82	14.29	10
ENSG00000078140	5296.39	0.0647442	1.0459	0.20987	0.308497	0.757704	0.920868	protein_coding	KNOWN	UBE2K	91.28	81.28	77.25	77.54
ENSG00000078142	1285.67	-0.146416	0.903492	0.195184	-0.750147	0.453166	0.767344	protein_coding	KNOWN	PIK3C3	22.34	37.02	33.04	22.46
ENSG00000078177	367.726	-0.14193	0.906306	0.29355	-0.483494	0.628745	0.867051	protein_coding	KNOWN	N4BP2	1.43	1.5	1.87	0.94
ENSG00000078237	908.687	-1.15117	0.450261	0.259881	-4.42959	9.44129e-06	0.000392212	protein_coding	KNOWN	C12orf5	30.77	39.84	17.8	12.89
ENSG00000078246	1560.4	0.191317	1.14181	0.344616	0.55516	0.578785	0.842419	protein_coding	KNOWN	TULP3	22.59	13.75	14.85	23.34
ENSG00000078269	923.199	0.212827	1.15896	0.203949	1.04353	0.296703	0.642305	protein_coding	KNOWN	SYNJ2	5.02	5.24	4.66	5.02
ENSG00000078304	4206.36	0.296961	1.22855	0.187509	1.58371	0.113259	0.397169	protein_coding	KNOWN	PPP2R5C	66.68	58.7	73.55	72.35
ENSG00000078319	222.819	0.493267	1.40763	0.289453	1.70414	0.0883555	0.348072	pseudogene	KNOWN	PMS2P1	11.2	11.46	17.19	16.45
ENSG00000078369	16602.6	0.176953	1.13049	0.170642	1.03698	0.299744	0.645887	protein_coding	KNOWN	GNB1	360.3	284.73	287.01	403.89
ENSG00000078399	2475.68	0.0629086	1.04457	0.315997	0.19908	0.8422	0.953664	protein_coding	KNOWN	HOXA9	90.43	53.97	50.55	91.5
ENSG00000078401	86.649	-0.68011	0.624118	0.433931	-1.56732	0.11704	0.404566	protein_coding	KNOWN	EDN1	2.12	1.69	1.06	1.24
ENSG00000078403	1315.22	0.289474	1.22219	0.252701	1.14552	0.251995	0.594354	protein_coding	KNOWN	MLLT10	13.23	13.58	14.54	12.54
ENSG00000078487	34.5401	0.521696	1.43564	0.637699	0.818091	0.413305	0.737589	protein_coding	KNOWN	ZCWPW1	0.92	0.74	1.06	1.5
ENSG00000078549	2.73936	0.000542041	1.00038	2.37182	0.000228534	0.999818	NA	protein_coding	KNOWN	ADCYAP1R1	0.11	0.01	0.03	0
ENSG00000078618	5950.74	-0.0526684	0.964151	0.180813	-0.291286	0.770833	0.925224	protein_coding	KNOWN	NRD1	75.71	70.64	65.71	82.12
ENSG00000078668	4140.78	-0.256702	0.836999	0.201102	-1.27648	0.201788	0.53438	protein_coding	KNOWN	VDAC3	157.02	144.74	121.8	117.55
ENSG00000078674	3035.46	-0.215924	0.860994	0.18921	-1.14119	0.253793	0.59641	protein_coding	KNOWN	PCM1	35.65	35.13	27.93	27.39
ENSG00000078687	1279.52	0.497803	1.41206	0.23004	2.16398	0.0304656	0.186582	protein_coding	KNOWN	TNRC6C	8.25	4.51	7.05	12.33
ENSG00000078699	420.292	0.448549	1.36467	0.250761	1.78875	0.0736547	0.314352	protein_coding	KNOWN	CBFA2T2	1.73	1.64	2.34	2.55
ENSG00000078747	3495.69	0.247033	1.18676	0.203524	1.21378	0.224832	0.562752	protein_coding	KNOWN	ITCH	24.77	27.99	34.45	23.34
ENSG00000078804	765.507	-0.903104	0.534735	0.28449	-3.17447	0.00150113	0.0225038	protein_coding	KNOWN	TP53INP2	10.51	7.77	3.52	5.22
ENSG00000078808	4520.73	0.049253	1.03473	0.207959	0.23684	0.812781	0.942011	protein_coding	KNOWN	SDF4	107.87	98.97	95.58	111.58
ENSG00000078814	5.44237	0.534679	1.44862	1.55511	0.343821	0.730981	NA	protein_coding	KNOWN	MYH7B	0.01	0.28	0.11	0.15
ENSG00000078900	824.981	-0.288794	0.818586	0.230281	-1.25409	0.209808	0.544157	protein_coding	KNOWN	TP73	7.58	6	4.52	5.9
ENSG00000078902	959.821	-0.403747	0.755893	0.211826	-1.90603	0.0566464	0.269864	protein_coding	KNOWN	TOLLIP	15.74	17.19	11.29	12.12
ENSG00000078967	392.516	-0.624639	0.648582	0.265254	-2.35487	0.0185291	0.134078	protein_coding	KNOWN	UBE2D4	17.51	14.42	9.41	11.07
ENSG00000079101	38.3527	-0.201803	0.869464	0.593914	-0.339784	0.734019	0.913173	protein_coding	KNOWN	CLUL1	1.16	1.42	1.44	0.6
ENSG00000079112	0.25905	-1.36781	0.387478	4.98046	-0.274636	0.783596	NA	protein_coding	KNOWN	CDH17	0	0.09	0	0
ENSG00000079134	348.998	-0.179523	0.882995	0.28027	-0.640535	0.521825	0.811249	protein_coding	KNOWN	THOC1	7.48	7.17	5.83	7.01
ENSG00000079150	221.134	-0.658121	0.633703	0.330101	-1.9937	0.0461854	0.240101	protein_coding	KNOWN	FKBP7	12.95	7.94	6.05	8.14
ENSG00000079156	551.361	0.278555	1.21298	0.239623	1.16247	0.245044	0.587356	protein_coding	KNOWN	OSBPL6	4.55	4.03	5.55	4.67
ENSG00000079215	1518.4	0.290141	1.22276	0.215079	1.349	0.177338	0.503158	protein_coding	KNOWN	SLC1A3	14.95	14.81	21.27	13.87
ENSG00000079246	19441.8	-0.0981336	0.934241	0.170429	-0.575802	0.564749	0.835531	protein_coding	KNOWN	XRCC5	208.35	210.86	191.79	186.11
ENSG00000079263	4.19971	-2.79108	0.144478	1.86322	-1.49799	0.134136	NA	protein_coding	KNOWN	SP140	0.28	0.31	0.02	0.01
ENSG00000079277	700.068	-0.470303	0.721813	0.231341	-2.03294	0.0420581	0.226323	protein_coding	KNOWN	MKNK1	19.22	17.54	13.57	13.57
ENSG00000079308	331.063	-0.767089	0.587602	0.264066	-2.90491	0.00367358	0.0432304	protein_coding	KNOWN	TNS1	2.08	1.95	1.35	0.96
ENSG00000079313	1601.77	0.0354153	1.02485	0.206736	0.171307	0.863982	0.960009	protein_coding	KNOWN	REXO1	22.17	13.02	14.67	17.08
ENSG00000079332	3947.47	-0.577421	0.670161	0.186972	-3.08828	0.0020132	0.0276829	protein_coding	KNOWN	SAR1A	56.26	59.82	41.79	47.37
ENSG00000079335	356.044	-0.526879	0.694055	0.275084	-1.91534	0.0554493	0.267194	protein_coding	KNOWN	CDC14A	5.13	3.1	2.41	2.75
ENSG00000079337	31.6844	0.337364	1.26345	0.802783	0.420243	0.674308	0.887633	protein_coding	KNOWN	RAPGEF3	0.25	0.32	0.31	0.46
ENSG00000079385	527.991	-2.21242	0.215772	0.305734	-7.23644	4.60608e-13	1.02463e-10	protein_coding	KNOWN	CEACAM1	14.06	8.39	2.2	2.82
ENSG00000079387	530.654	-0.123995	0.917643	0.24116	-0.514161	0.60714	0.857782	protein_coding	KNOWN	SENP1	5.02	4.11	3.94	3.68
ENSG00000079393	9.50806	0.320817	1.24904	1.13006	0.283895	0.776491	NA	protein_coding	KNOWN	DUSP13	0.27	0.33	0.34	0.43
ENSG00000079432	3036.16	0.0469026	1.03304	0.263873	0.177747	0.858922	0.958808	protein_coding	KNOWN	CIC	34.43	21.83	19.72	36.86
ENSG00000079435	180.011	0.661627	1.58187	0.364997	1.81269	0.0698793	0.303074	protein_coding	KNOWN	LIPE	4.16	2.58	3.84	7.71
ENSG00000079459	15921.3	1.07733	2.11013	0.171413	6.28501	3.27842e-10	4.22579e-08	protein_coding	KNOWN	FDFT1	219.91	214.4	421.98	444.51
ENSG00000079462	2135.01	0.437583	1.35433	0.19854	2.20401	0.027524	0.174157	protein_coding	KNOWN	PAFAH1B3	79.61	78.55	99.56	111.61
ENSG00000079482	414.346	-0.222686	0.856968	0.276535	-0.805275	0.420661	0.743148	protein_coding	KNOWN	OPHN1	3.28	2.37	1.83	2.34
ENSG00000079616	3391.42	0.751699	1.68377	0.206949	3.63228	0.000280923	0.00637252	protein_coding	KNOWN	KIF22	47.07	42.2	68.83	77.23
ENSG00000079691	1077.87	0.0994024	1.07133	0.201941	0.492235	0.622553	0.865463	protein_coding	KNOWN	LRRC16A	8.21	7.13	9.24	9.27
ENSG00000079739	3461.74	0.174715	1.12874	0.178032	0.981369	0.326411	0.667753	protein_coding	KNOWN	PGM1	46.63	47.45	52.02	50.57
ENSG00000079785	4846.22	-0.21545	0.861277	0.219164	-0.983054	0.325581	0.667616	protein_coding	KNOWN	DDX1	60.67	76.24	64.18	50.03
ENSG00000079805	5607.92	0.31929	1.24772	0.199657	1.59919	0.109777	0.390586	protein_coding	KNOWN	DNM2	60.3	60.93	64.91	76.01
ENSG00000079819	3248.33	0.481011	1.39572	0.226211	2.12638	0.0334712	0.197196	protein_coding	KNOWN	EPB41L2	39.99	20.16	28.02	49.38
ENSG00000079931	16.6746	-0.309424	0.806964	0.87089	-0.355296	0.722368	NA	protein_coding	KNOWN	MOXD1	0.27	0.2	0.33	0.15
ENSG00000079950	2178.61	-0.0401609	0.972546	0.226294	-0.177473	0.859137	0.95883	protein_coding	KNOWN	STX7	37.96	39.79	37.18	30.66
ENSG00000079974	504.205	-1.35553	0.39079	0.251648	-5.38662	7.1796e-08	5.70524e-06	protein_coding	KNOWN	RABL2B	13.73	11.9	4.86	4.65
ENSG00000079999	2222.08	-0.349636	0.784782	0.214486	-1.63011	0.103077	0.377895	protein_coding	KNOWN	KEAP1	54.79	57.07	41.39	45.46
ENSG00000080031	392.337	0.761923	1.69575	0.253839	3.00159	0.00268569	0.0342922	protein_coding	KNOWN	PTPRH	5.03	4.57	8.1	8.15
ENSG00000080189	973.433	-0.300402	0.812026	0.226278	-1.32758	0.184317	0.51307	protein_coding	KNOWN	SLC35C2	19.52	19.78	13.02	16.44
ENSG00000080200	504.32	-0.253276	0.838989	0.274031	-0.924262	0.35535	0.692825	protein_coding	KNOWN	CRYBG3	4.7	5.7	5.14	3.57
ENSG00000080298	426.166	-0.11914	0.920737	0.281189	-0.423698	0.671786	0.886705	protein_coding	KNOWN	RFX3	2.63	2.95	2.76	3.3
ENSG00000080345	1863.13	0.183299	1.13548	0.207327	0.884106	0.376639	0.71098	protein_coding	KNOWN	RIF1	6.64	6.36	8.07	6.12
ENSG00000080371	1634.19	-0.598374	0.660498	0.230981	-2.59058	0.00958138	0.0859769	protein_coding	KNOWN	RAB21	37.93	32.92	21.98	23.45
ENSG00000080493	13.5623	0.30293	1.23365	0.970178	0.312242	0.754857	NA	protein_coding	KNOWN	SLC4A4	0.08	0.09	0.1	0.09
ENSG00000080503	1104.67	0.11275	1.08129	0.207611	0.54308	0.587075	0.847766	protein_coding	KNOWN	SMARCA2	14.16	10.53	10.49	13.53
ENSG00000080546	621.727	-1.16979	0.444487	0.256221	-4.56554	4.98217e-06	0.000229487	protein_coding	KNOWN	SESN1	10.67	12.2	4.72	3.7
ENSG00000080561	184.672	0.29283	1.22504	0.314323	0.93162	0.351533	0.689666	protein_coding	KNOWN	MID2	2.45	2.67	3	3.04
ENSG00000080573	9.14537	0.271042	1.20668	1.24144	0.218329	0.827173	NA	protein_coding	KNOWN	COL5A3	0.02	0.07	0.04	0.07
ENSG00000080603	5991.4	-0.353378	0.782749	0.217064	-1.62799	0.103526	0.378436	protein_coding	KNOWN	SRCAP	26.2	22.52	17.05	18.56
ENSG00000080608	1405.59	0.340776	1.26644	0.342031	0.996331	0.319089	0.662583	protein_coding	KNOWN	KIAA0020	23.06	17.35	22.59	30.89
ENSG00000080644	23.1353	0.157404	1.11528	0.739654	0.212808	0.831477	0.948687	protein_coding	KNOWN	CHRNA3	0.5	0.69	0.66	0.51
ENSG00000080802	1232.29	-0.140247	0.907364	0.333742	-0.420225	0.674321	0.887633	protein_coding	KNOWN	CNOT4	15.83	9.89	8.29	14.43
ENSG00000080815	2427.49	-0.18582	0.879149	0.188203	-0.987334	0.323479	0.666281	protein_coding	KNOWN	PSEN1	27.27	26.28	24.36	21.37
ENSG00000080819	5081.76	0.150391	1.10987	0.241381	0.623043	0.533257	0.817731	protein_coding	KNOWN	CPOX	57.02	67.05	77.66	58.08
ENSG00000080822	7844.11	0.0920318	1.06587	0.188192	0.489031	0.624819	0.865467	protein_coding	KNOWN	CLDND1	146.13	139.21	154.44	142.25
ENSG00000080823	189.001	-0.62954	0.646382	0.400948	-1.57013	0.116385	0.403007	protein_coding	KNOWN	MOK	11.83	6.2	3.67	6.04
ENSG00000080824	164626	0.523064	1.437	0.191255	2.7349	0.00623983	0.0636536	protein_coding	KNOWN	HSP90AA1	1477.53	1399.7	1857.09	2116.47
ENSG00000080839	428.611	-0.110581	0.926215	0.243566	-0.45401	0.649822	0.875152	protein_coding	KNOWN	RBL1	5.13	3.26	2.6	2.27
ENSG00000080845	2294.33	-0.201082	0.869898	0.306545	-0.655964	0.511847	0.804409	protein_coding	KNOWN	DLGAP4	38.95	26.62	22.52	36.26
ENSG00000080854	75.3743	0.987001	1.98206	0.514779	1.91733	0.055196	0.266642	protein_coding	KNOWN	IGSF9B	0.78	0.45	0.66	1.26
ENSG00000080947	9.05068	0.838573	1.78828	1.15987	0.722988	0.469687	NA	pseudogene	KNOWN	CROCCP3	0.08	0.04	0.4	0.08
ENSG00000080986	1098.66	0.820922	1.76653	0.201743	4.06915	4.71841e-05	0.00146899	protein_coding	KNOWN	NDC80	13.63	13.25	22.56	23.29
ENSG00000081014	551.923	-0.422606	0.746076	0.302217	-1.39835	0.162007	0.480051	protein_coding	KNOWN	AP4E1	3.53	3.59	2.89	2.47
ENSG00000081019	1102.51	-0.123956	0.917668	0.231155	-0.536248	0.591787	0.849847	protein_coding	KNOWN	RSBN1	6	5.93	7.83	4.49
ENSG00000081026	651.972	0.554457	1.46862	0.235976	2.34963	0.0187921	0.135201	protein_coding	KNOWN	MAGI3	2.94	3.11	4.87	3.87
ENSG00000081041	4.91007	0.530434	1.44436	1.573	0.337211	0.735958	NA	protein_coding	KNOWN	CXCL2	0.2	0.07	0.18	0.2
ENSG00000081052	407.19	-0.086596	0.941742	0.250653	-0.345481	0.729733	0.911178	protein_coding	KNOWN	COL4A4	1.54	1.39	1.43	1.19
ENSG00000081059	1427.95	0.0228021	1.01593	0.276547	0.0824529	0.934287	0.98164	protein_coding	KNOWN	TCF7	30.58	16.32	16.51	29.85
ENSG00000081087	781.459	-0.309336	0.807013	0.214881	-1.43957	0.149989	0.46372	protein_coding	KNOWN	OSTM1	8.63	10.51	9.13	5.76
ENSG00000081154	4490.96	0.0782162	1.05571	0.181745	0.430363	0.666931	0.885049	protein_coding	KNOWN	PCNP	84.08	102.99	105.5	82.22
ENSG00000081177	1227.11	-0.339466	0.790334	0.207132	-1.63889	0.101236	0.374629	protein_coding	KNOWN	EXD2	16.67	15.96	14.73	11.11
ENSG00000081181	661.573	0.742615	1.67321	0.218166	3.40389	0.000664327	0.012419	protein_coding	KNOWN	ARG2	8.59	9.23	15.16	14.62
ENSG00000081189	242.362	0.644698	1.56341	0.301628	2.13739	0.0325661	0.193934	protein_coding	KNOWN	MEF2C	2.83	1.86	2.75	3.88
ENSG00000081307	801.839	-0.391256	0.762466	0.227168	-1.72232	0.0850115	0.341134	protein_coding	KNOWN	UBA5	14.43	16.17	12.27	10.05
ENSG00000081320	646.124	0.946362	1.92701	0.249496	3.7931	0.000148778	0.00379076	protein_coding	KNOWN	STK17B	3.76	3.8	6.64	7.53
ENSG00000081377	1228.68	-0.00418863	0.997101	0.288198	-0.0145339	0.988404	0.997725	protein_coding	KNOWN	CDC14B	7.69	9.78	11.73	6.21
ENSG00000081386	250.83	0.0903788	1.06465	0.297543	0.30375	0.761318	0.922057	protein_coding	KNOWN	ZNF510	1.69	1.86	2.45	1.46
ENSG00000081665	3.55881	1.48304	2.79537	1.8348	0.808284	0.418927	NA	protein_coding	KNOWN	ZNF506	0.01	0.15	0.09	0.06
ENSG00000081692	413.764	-0.424846	0.744918	0.284243	-1.49466	0.135004	0.439455	protein_coding	KNOWN	JMJD4	6.2	8.18	4.84	5.32
ENSG00000081721	442.625	0.440091	1.35669	0.255918	1.71966	0.0854951	0.341908	protein_coding	KNOWN	DUSP12	13.85	11.49	17.09	15.84
ENSG00000081760	690.819	-0.688806	0.620367	0.256926	-2.68095	0.00734125	0.0718772	protein_coding	KNOWN	AACS	7.78	10.65	5.9	5.4
ENSG00000081791	1013.88	-0.230543	0.852314	0.206234	-1.11787	0.263621	0.60636	protein_coding	KNOWN	KIAA0141	25.18	22.43	21.72	20.68
ENSG00000081803	604.691	-0.174355	0.886164	0.356474	-0.489109	0.624764	0.865467	protein_coding	KNOWN	CADPS2	4.44	7.46	6.73	3.63
ENSG00000081870	741.895	0.164365	1.12067	0.278999	0.589123	0.555778	0.82904	protein_coding	KNOWN	HSPB11	46.87	38.85	41.12	51.37
ENSG00000081913	774.369	0.165893	1.12186	0.225411	0.73596	0.461755	0.771861	protein_coding	KNOWN	PHLPP1	3.96	3.95	4.65	3.78
ENSG00000081923	495.371	0.648741	1.5678	0.269622	2.40611	0.0161232	0.122986	protein_coding	KNOWN	ATP8B1	2.68	3.14	4.65	4.16
ENSG00000081985	1.87891	-2.62412	0.162204	2.79269	-0.939636	0.347404	NA	protein_coding	KNOWN	IL12RB2	0.03	0.03	0	0.01
ENSG00000082014	489.659	-0.22715	0.854321	0.254104	-0.893924	0.371363	0.70646	protein_coding	KNOWN	SMARCD3	12.25	11.91	9.01	10.6
ENSG00000082068	1222.31	0.0112091	1.0078	0.210595	0.0532259	0.957552	0.988663	protein_coding	KNOWN	WDR70	16.72	17.03	15.66	16.31
ENSG00000082146	663.247	0.502115	1.41629	0.255037	1.9688	0.0489764	0.247963	protein_coding	KNOWN	STRADB	10.61	12.69	17.5	12.43
ENSG00000082153	16762.1	0.0583251	1.04126	0.229827	0.253779	0.799667	0.937601	protein_coding	KNOWN	BZW1	159.49	218.35	242.17	149.28
ENSG00000082196	9.30738	-0.055279	0.962408	1.21906	-0.0453456	0.963832	NA	protein_coding	KNOWN	C1QTNF3	0.15	0.28	0.3	0.11
ENSG00000082212	2421.63	-0.236712	0.848677	0.19983	-1.18457	0.236187	0.57754	protein_coding	KNOWN	ME2	56.91	29.52	25.71	43.54
ENSG00000082213	1406.91	-0.396402	0.759751	0.243117	-1.6305	0.102997	0.377801	protein_coding	KNOWN	C5orf22	21.13	14.12	12.08	16.09
ENSG00000082258	1274	-0.0103498	0.992852	0.212288	-0.0487535	0.961116	0.989372	protein_coding	KNOWN	CCNT2	10.28	8.9	9.63	8.24
ENSG00000082269	558.169	0.357786	1.28146	0.263734	1.35662	0.174902	0.499845	protein_coding	KNOWN	FAM135A	3.28	3.94	6.3	4.04
ENSG00000082438	230.696	0.164058	1.12043	0.343889	0.477066	0.633315	0.869036	protein_coding	KNOWN	COBLL1	2.22	1.21	2.52	2.28
ENSG00000082458	1937.59	-0.199634	0.870772	0.212575	-0.939119	0.34767	0.687661	protein_coding	KNOWN	DLG3	48.66	30.9	26.08	44.24
ENSG00000082497	67.4606	-0.575708	0.670957	0.504976	-1.14007	0.254257	0.59641	protein_coding	KNOWN	SERTAD4	0.84	0.49	0.33	0.85
ENSG00000082512	208.27	0.758323	1.69152	0.310683	2.44083	0.0146536	0.114962	protein_coding	KNOWN	TRAF5	1.85	1.32	2.9	2.54
ENSG00000082515	1161.77	0.340639	1.26632	0.214102	1.59101	0.111607	0.394367	protein_coding	KNOWN	MRPL22	60.71	40.58	58.77	73.81
ENSG00000082516	2829.09	-0.286387	0.819953	0.194635	-1.4714	0.141182	0.449489	protein_coding	KNOWN	GEMIN5	19.39	20.24	17.09	14.39
ENSG00000082641	9480.56	-0.169033	0.889439	0.241761	-0.699173	0.484444	0.786053	protein_coding	KNOWN	NFE2L1	116.83	85.19	67.51	104.21
ENSG00000082701	3425.89	-0.131482	0.912893	0.179835	-0.731126	0.464702	0.773699	protein_coding	KNOWN	GSK3B	38.55	26.66	26.95	36.16
ENSG00000082781	2228.39	0.0676298	1.04799	0.18894	0.357942	0.720386	0.90774	protein_coding	KNOWN	ITGB5	33.15	29.84	33.76	36.28
ENSG00000082805	1762.52	0.706635	1.63199	0.188783	3.74311	0.000181756	0.00440558	protein_coding	KNOWN	ERC1	5.44	5.37	8.42	8.89
ENSG00000082898	8806.93	0.476407	1.39127	0.256847	1.85483	0.0636208	0.28864	protein_coding	KNOWN	XPO1	51.83	63.99	92.8	61.59
ENSG00000082996	1336.54	-0.105166	0.929698	0.227639	-0.461985	0.644092	0.872737	protein_coding	KNOWN	RNF13	32.21	23.61	26.65	19.95
ENSG00000083093	592.854	0.0389637	1.02738	0.233971	0.166532	0.867738	0.960964	protein_coding	KNOWN	PALB2	7.3	6.22	6.91	6.15
ENSG00000083097	209.934	-0.454998	0.729511	0.326376	-1.39409	0.16329	0.481834	protein_coding	KNOWN	DOPEY1	1.55	1.3	1.09	0.73
ENSG00000083099	586.949	0.0332234	1.0233	0.238555	0.139269	0.889238	0.968596	protein_coding	KNOWN	LYRM2	6.21	9.18	9.36	5.68
ENSG00000083123	154.56	-0.464413	0.724766	0.343909	-1.3504	0.176889	0.502502	protein_coding	KNOWN	BCKDHB	2.25	3.13	2.04	1.71
ENSG00000083168	3050.6	-0.0399679	0.972677	0.183416	-0.217908	0.827501	0.94697	protein_coding	KNOWN	KAT6A	11.63	11.14	10.73	11.04
ENSG00000083223	1119.21	0.131844	1.09569	0.221792	0.594451	0.552211	0.827656	protein_coding	KNOWN	ZCCHC6	12.27	7.45	7.77	15.35
ENSG00000083290	266.051	-0.160778	0.894543	0.304496	-0.528014	0.59749	0.852731	protein_coding	KNOWN	ULK2	4.12	2.41	2.11	3.4
ENSG00000083307	941.521	-0.0191759	0.986796	0.220537	-0.0869509	0.930711	0.980299	protein_coding	KNOWN	GRHL2	5.55	6.86	7	6.62
ENSG00000083312	6269.84	0.445252	1.36155	0.259429	1.71628	0.0861113	0.342755	protein_coding	KNOWN	TNPO1	65.28	49.22	72.74	72.41
ENSG00000083444	17190.9	0.213436	1.15945	0.21063	1.01332	0.310905	0.654178	protein_coding	KNOWN	PLOD1	215.03	191.52	201.97	251.67
ENSG00000083454	317.233	0.342307	1.26778	0.278321	1.2299	0.218734	0.555885	protein_coding	KNOWN	P2RX5	6.46	8.53	8.67	8.2
ENSG00000083457	376.748	0.430454	1.34766	0.390686	1.10179	0.270553	0.613728	protein_coding	KNOWN	ITGAE	14.79	28.02	34.23	20.83
ENSG00000083520	2724.81	-0.157828	0.896373	0.203141	-0.776938	0.437196	0.756562	protein_coding	KNOWN	DIS3	27.93	23.02	23.07	20.35
ENSG00000083535	522.989	0.130216	1.09446	0.280461	0.464294	0.642437	0.872105	protein_coding	KNOWN	PIBF1	5.23	6.73	7.13	5.51
ENSG00000083544	448.893	0.409823	1.32852	0.236446	1.73326	0.0830488	0.336474	protein_coding	KNOWN	TDRD3	5.9	5.74	8.21	6.91
ENSG00000083635	780.164	-0.0523537	0.964362	0.266281	-0.196611	0.844132	0.954249	protein_coding	KNOWN	NUFIP1	8.93	6.91	6.52	8.22
ENSG00000083642	1104.25	0.388791	1.3093	0.228753	1.69961	0.0892042	0.350014	protein_coding	KNOWN	PDS5B	12.7	7.31	8.07	13.67
ENSG00000083720	1626.11	-0.28081	0.823128	0.198575	-1.41413	0.157324	0.472828	protein_coding	KNOWN	OXCT1	18.86	18.77	16.08	13.63
ENSG00000083750	347.771	0.246301	1.18616	0.255642	0.96346	0.335316	0.677585	protein_coding	KNOWN	RRAGB	6.97	7.31	8.1	6.73
ENSG00000083799	543.415	0.250184	1.18936	0.301098	0.830906	0.406027	0.73253	protein_coding	KNOWN	CYLD	4.08	4.59	5.11	3.51
ENSG00000083807	332.224	0.358574	1.28216	0.272705	1.31488	0.188551	0.51782	protein_coding	KNOWN	SLC27A5	18.78	24.06	24.78	25.82
ENSG00000083812	303.266	-0.559425	0.678572	0.274649	-2.03687	0.0416626	0.225337	protein_coding	KNOWN	ZNF324	3.74	4.32	2.61	2.77
ENSG00000083817	101.827	-0.56606	0.675459	0.405809	-1.39489	0.163048	0.481327	protein_coding	KNOWN	ZNF416	1.67	1.71	1.29	0.92
ENSG00000083828	43.5646	0.146465	1.10685	0.576461	0.254076	0.799437	0.937491	protein_coding	KNOWN	ZNF586	0.91	0.58	1.1	0.63
ENSG00000083838	186.781	-0.519445	0.69764	0.312882	-1.66019	0.0968759	0.366094	protein_coding	KNOWN	ZNF446	3.11	3.28	2.55	2.56
ENSG00000083842	186.295	0.219936	1.16468	0.309897	0.709705	0.477887	0.780834	protein_coding	KNOWN	ZNF8	2.65	2.98	3.15	3.17
ENSG00000083844	356.332	-0.23672	0.848673	0.349317	-0.677664	0.497985	0.796857	protein_coding	KNOWN	ZNF264	4.43	7.08	5.73	4.25
ENSG00000083845	29120.2	0.41288	1.33134	0.261127	1.58115	0.113845	0.398413	protein_coding	KNOWN	RPS5	1191.75	1795.82	2207.85	1643.21
ENSG00000083857	70098.7	-0.188027	0.877806	0.234856	-0.800603	0.423362	0.74497	protein_coding	KNOWN	FAT1	486.69	342.28	358.61	391.4
ENSG00000083896	2133.87	0.306715	1.23689	0.226555	1.35382	0.175794	0.501449	protein_coding	KNOWN	YTHDC1	24.26	20.38	25.57	29.4
ENSG00000083937	1975.35	0.299241	1.2305	0.18641	1.60528	0.108431	0.387833	protein_coding	KNOWN	CHMP2B	29.22	34.03	40.08	34.62
ENSG00000084070	1069.5	0.155801	1.11404	0.252246	0.617654	0.536803	0.820161	protein_coding	KNOWN	SMAP2	17.72	13.57	14.26	17.31
ENSG00000084072	2320.15	0.287434	1.22047	0.190348	1.51005	0.131031	0.431928	protein_coding	KNOWN	PPIE	60.36	68.38	77.68	76.47
ENSG00000084073	2897.34	-0.215228	0.86141	0.207044	-1.03953	0.29856	0.644504	protein_coding	KNOWN	ZMPSTE24	34.73	37.69	33.9	26.22
ENSG00000084090	7577.96	-0.10909	0.927173	0.214405	-0.508802	0.610891	0.859512	protein_coding	KNOWN	STARD7	73.69	94.05	83.4	65.35
ENSG00000084092	1664.4	0.0303157	1.02124	0.203835	0.148726	0.88177	0.965617	protein_coding	KNOWN	NOA1	17.46	16.2	15.76	17.41
ENSG00000084093	2224.51	-0.0314286	0.978451	0.264801	-0.118688	0.905523	0.973875	protein_coding	KNOWN	REST	9.3	12.37	12.64	8.01
ENSG00000084110	3.84937	0.787182	1.7257	1.78359	0.441347	0.658962	NA	protein_coding	KNOWN	HAL	0.02	0.09	0.08	0.02
ENSG00000084112	5935.12	-0.211468	0.863658	0.219809	-0.962052	0.336024	0.678045	protein_coding	KNOWN	SSH1	24.46	29.98	25.47	19.14
ENSG00000084207	12123.8	0.0656609	1.04656	0.182319	0.360142	0.718741	0.906776	protein_coding	KNOWN	GSTP1	592.31	625.67	579.41	656.12
ENSG00000084234	15400.7	0.422278	1.34004	0.202588	2.08442	0.037122	0.210781	protein_coding	KNOWN	APLP2	142.45	137.27	168.29	194.91
ENSG00000084444	1111.87	0.0492811	1.03475	0.256392	0.19221	0.847578	0.955453	protein_coding	KNOWN	KIAA1467	8.67	10.16	10.13	8.06
ENSG00000084463	4691.73	-0.0426229	0.970888	0.260214	-0.163799	0.869889	0.961956	protein_coding	KNOWN	WBP11	72.56	50.41	51.28	64.07
ENSG00000084623	10164.8	0.0372958	1.02619	0.17815	0.20935	0.834175	0.95037	protein_coding	KNOWN	EIF3I	276	266.78	257.19	281.35
ENSG00000084628	223.259	-0.556013	0.680179	0.368471	-1.50897	0.131305	0.43252	protein_coding	KNOWN	NKAIN1	4	3.63	1.81	3.39
ENSG00000084636	24.8655	0.102007	1.07327	0.752728	0.135516	0.892204	0.969755	protein_coding	KNOWN	COL16A1	0.44	0.75	0.74	1.36
ENSG00000084652	1570.23	-0.0311548	0.978637	0.198856	-0.156671	0.875504	0.963117	protein_coding	KNOWN	TXLNA	10.26	12.02	10.7	10.39
ENSG00000084676	861.813	0.153609	1.11235	0.244715	0.627705	0.530197	0.81565	protein_coding	KNOWN	NCOA1	4.68	3.76	4.14	4.61
ENSG00000084693	1783.14	-0.115949	0.922775	0.225795	-0.513515	0.607591	0.857999	protein_coding	KNOWN	AGBL5	29.67	26.81	21.95	26.79
ENSG00000084710	40.7877	-0.244593	0.844054	0.606686	-0.403163	0.686828	0.893614	protein_coding	KNOWN	EFR3B	0.32	0.52	0.39	0.33
ENSG00000084731	1083.39	-0.0904455	0.939233	0.207847	-0.435154	0.663451	0.883156	protein_coding	KNOWN	KIF3C	8.17	8.96	6.99	8.44
ENSG00000084733	7706.98	-0.00523278	0.996379	0.187574	-0.0278971	0.977744	0.994274	protein_coding	KNOWN	RAB10	208.95	114.91	111.38	187.61
ENSG00000084754	7261.2	0.0402588	1.0283	0.179582	0.224181	0.822617	0.945716	protein_coding	KNOWN	HADHA	81.14	93.13	83.28	88.25
ENSG00000084764	421.475	1.04209	2.05921	0.24419	4.26755	1.97631e-05	0.000706148	protein_coding	KNOWN	MAPRE3	5.85	5.39	10.64	11.2
ENSG00000084774	5388.4	-0.0941213	0.936843	0.228446	-0.412007	0.680334	0.889942	protein_coding	KNOWN	CAD	33.09	34.52	34.63	31.17
ENSG00000085063	6334.5	-0.257355	0.83662	0.216766	-1.18725	0.23513	0.576816	protein_coding	KNOWN	CD59	159.79	197.36	153.93	138.04
ENSG00000085117	392.862	-0.268766	0.830029	0.252362	-1.065	0.286875	0.630658	protein_coding	KNOWN	CD82	9.16	7.56	6.82	6.33
ENSG00000085185	2925.99	0.109652	1.07897	0.226748	0.483587	0.628679	0.867051	protein_coding	KNOWN	BCORL1	14.98	14.77	14.31	16.91
ENSG00000085224	2587.08	-0.216883	0.860422	0.206975	-1.04787	0.294697	0.639569	protein_coding	KNOWN	ATRX	10.26	8.79	9.14	10.59
ENSG00000085231	3155.59	-0.338377	0.79093	0.207288	-1.6324	0.102595	0.37723	protein_coding	KNOWN	TAF9	130.7	103.06	95.31	85.49
ENSG00000085274	836.457	0.443901	1.36028	0.22232	1.99668	0.0458605	0.239293	protein_coding	KNOWN	MYNN	8.21	8.97	12.22	10.06
ENSG00000085276	174.293	-0.667018	0.629807	0.337062	-1.97892	0.0478253	0.245025	protein_coding	KNOWN	MECOM	2.45	1.79	0.86	1.71
ENSG00000085365	2784.53	0.0487979	1.0344	0.188379	0.259041	0.795603	0.935541	protein_coding	KNOWN	SCAMP1	23.04	26.36	24.48	20.7
ENSG00000085377	3637.91	-0.280146	0.823508	0.192464	-1.45558	0.14551	0.456591	protein_coding	KNOWN	PREP	48.65	55	44.93	39.48
ENSG00000085382	401.771	-0.108512	0.927544	0.323585	-0.335343	0.737366	0.914502	protein_coding	KNOWN	HACE1	3.11	5.05	4.35	2.6
ENSG00000085415	2348.73	0.325491	1.25309	0.225876	1.44102	0.149579	0.463567	protein_coding	KNOWN	SEH1L	30.6	33	40.82	34.76
ENSG00000085433	525.89	0.488811	1.40329	0.264736	1.84641	0.0648324	0.291849	protein_coding	KNOWN	WDR47	3.26	3.95	5.61	4.15
ENSG00000085449	2333.62	0.0944422	1.06765	0.199736	0.472836	0.63633	0.869429	protein_coding	KNOWN	WDFY1	19.32	17.44	18.72	18.38
ENSG00000085465	43.7098	1.22072	2.33063	0.622392	1.96134	0.0498398	0.25069	protein_coding	KNOWN	OVGP1	0.57	0.35	0.91	1.05
ENSG00000085491	2428.56	-0.486297	0.713855	0.200454	-2.42598	0.0152672	0.118229	protein_coding	KNOWN	SLC25A24	30.31	26.62	21.04	17.99
ENSG00000085511	1477.41	0.436468	1.35329	0.194011	2.2497	0.0244677	0.161773	protein_coding	KNOWN	MAP3K4	11.46	9.07	11.88	14.97
ENSG00000085514	2.0605	0.00354981	1.00246	3.11495	0.00113961	0.999091	NA	protein_coding	KNOWN	PILRA	0	0.18	0	0.17
ENSG00000085552	632.77	-0.184716	0.879822	0.240948	-0.766623	0.443306	0.761119	protein_coding	KNOWN	IGSF9	5.77	5.82	4.4	5.37
ENSG00000085563	136.019	0.202897	1.15101	0.370877	0.547074	0.584328	0.846006	protein_coding	KNOWN	ABCB1	1.04	1.19	2.21	1.63
ENSG00000085644	402.828	-0.223782	0.856318	0.273491	-0.818243	0.413218	0.737558	protein_coding	KNOWN	ZNF213	4.89	4.75	3.42	4.37
ENSG00000085662	1312.75	-0.202503	0.869041	0.305876	-0.662043	0.507944	0.802605	protein_coding	KNOWN	AKR1B1	29.67	52.38	45.03	27.14
ENSG00000085719	7835.92	-0.420123	0.747361	0.269709	-1.55769	0.119307	0.409733	protein_coding	KNOWN	CPNE3	65.01	81.95	67.37	36.51
ENSG00000085721	3128.49	-0.235034	0.849665	0.198497	-1.18407	0.236387	0.57754	protein_coding	KNOWN	RRN3	30.56	34.74	29.26	23.77
ENSG00000085733	5230.32	-0.0397118	0.972849	0.19039	-0.208581	0.834775	0.950537	protein_coding	KNOWN	CTTN	65.08	68.26	61.61	78.54
ENSG00000085741	45.4659	1.04671	2.06581	0.581798	1.79909	0.0720039	0.309757	protein_coding	KNOWN	WNT11	0.68	0.44	1.05	1.3
ENSG00000085760	1248.03	-0.0866017	0.941738	0.198097	-0.437169	0.661989	0.882732	protein_coding	KNOWN	MTIF2	18.79	19.21	18.48	17.26
ENSG00000085788	1260.38	-0.153726	0.898926	0.198255	-0.775395	0.438106	0.757188	protein_coding	KNOWN	DDHD2	20.34	22	22.21	20.48
ENSG00000085831	485.113	-0.0440915	0.9699	0.242524	-0.181802	0.855738	0.957314	protein_coding	KNOWN	TTC39A	8.57	7.16	6.48	8.25
ENSG00000085832	1759.68	0.531287	1.44522	0.22001	2.41484	0.0157423	0.120822	protein_coding	KNOWN	EPS15	12.35	10.95	15.79	14.23
ENSG00000085840	781.446	0.162156	1.11896	0.241856	0.670464	0.502562	0.798951	protein_coding	KNOWN	ORC1	7.54	8.89	10.09	7.67
ENSG00000085871	629.231	-0.512774	0.700873	0.250246	-2.04908	0.040454	0.221055	protein_coding	KNOWN	MGST2	45.7	35.22	26.76	28.04
ENSG00000085872	3325.36	-0.165347	0.891714	0.256019	-0.645837	0.518385	0.80836	protein_coding	KNOWN	CHERP	33.2	26.19	22.39	30.35
ENSG00000085978	1624.27	0.236507	1.17814	0.191139	1.23736	0.215955	0.552551	protein_coding	KNOWN	ATG16L1	21.24	17.34	19.58	22.79
ENSG00000085982	802.724	-0.454448	0.72979	0.219849	-2.06709	0.0387256	0.215887	protein_coding	KNOWN	USP40	6.76	7.4	6.42	4.95
ENSG00000085998	3041.81	-0.317669	0.802365	0.184881	-1.71824	0.0857529	0.342249	protein_coding	KNOWN	POMGNT1	53.21	48.98	39.11	46.09
ENSG00000085999	1004.99	0.687889	1.61092	0.2068	3.32635	0.000879911	0.015294	protein_coding	KNOWN	RAD54L	9.35	11.89	18.44	14.87
ENSG00000086015	3399.82	0.164199	1.12054	0.186703	0.879464	0.37915	0.712916	protein_coding	KNOWN	MAST2	21.68	22.65	22.6	24.15
ENSG00000086061	12965.4	-0.342309	0.788778	0.170623	-2.00623	0.0448317	0.236265	protein_coding	KNOWN	DNAJA1	225.55	265.98	202.16	172.76
ENSG00000086062	1793.91	-0.189567	0.876869	0.201576	-0.940427	0.346999	0.686826	protein_coding	KNOWN	B4GALT1	15.81	15.74	15.1	12.05
ENSG00000086065	2680.5	0.0335492	1.02353	0.240874	0.139282	0.889228	0.968596	protein_coding	KNOWN	CHMP5	61.26	75.66	79.65	55.98
ENSG00000086102	1422.17	0.0167247	1.01166	0.201515	0.0829945	0.933856	0.981342	protein_coding	KNOWN	NFX1	12.56	12.04	11.73	12.51
ENSG00000086189	1330.32	0.0771255	1.05491	0.196437	0.392623	0.694598	0.897751	protein_coding	KNOWN	DIMT1	19.94	25.81	25.06	17.58
ENSG00000086200	1721.52	0.091762	1.06567	0.29822	0.307699	0.758311	0.920953	protein_coding	KNOWN	IPO11	18.84	17.93	22.09	16.88
ENSG00000086232	8080.33	0.307641	1.23768	0.207447	1.48298	0.138079	0.444327	protein_coding	KNOWN	EIF2AK1	59.73	66.94	77.44	78.98
ENSG00000086289	685.258	-0.121367	0.919316	0.21691	-0.559523	0.575805	0.841884	protein_coding	KNOWN	EPDR1	9.83	10.77	9.65	8.36
ENSG00000086300	908.17	0.381401	1.30261	0.260009	1.46688	0.142409	0.45159	protein_coding	KNOWN	SNX10	10.83	13.3	19.7	12.04
ENSG00000086475	2022.39	0.239463	1.18055	0.185444	1.2913	0.196601	0.525926	protein_coding	KNOWN	SEPHS1	51.87	48.42	55.15	54.31
ENSG00000086504	1289.82	0.0222508	1.01554	0.253075	0.087922	0.929939	0.980171	protein_coding	KNOWN	MRPL28	56.02	46.62	39.27	63.06
ENSG00000086544	513.206	-0.542567	0.686548	0.249493	-2.17468	0.0296544	0.183405	protein_coding	KNOWN	ITPKC	5.53	7.06	4.13	4.33
ENSG00000086570	262.173	-2.01957	0.246632	0.294013	-6.86899	6.46571e-12	1.23854e-09	protein_coding	KNOWN	FAT2	1.15	1.34	0.26	0.26
ENSG00000086589	2779.83	0.208565	1.15554	0.252611	0.825638	0.40901	0.735326	protein_coding	KNOWN	RBM22	44.89	35.48	39.48	51.21
ENSG00000086598	10293.5	0.132323	1.09606	0.18052	0.733009	0.463553	0.773261	protein_coding	KNOWN	TMED2	165.67	158.75	175.09	157.14
ENSG00000086619	390.716	0.218888	1.16384	0.268153	0.816281	0.414339	0.738126	protein_coding	KNOWN	ERO1LB	4.53	3.8	3.61	4.19
ENSG00000086666	1621.64	0.681201	1.60347	0.198218	3.43663	0.000589001	0.0112826	protein_coding	KNOWN	ZFAND6	40.79	34.3	56.36	57.82
ENSG00000086712	1511.77	-0.107643	0.928103	0.234341	-0.459345	0.645986	0.873457	protein_coding	KNOWN	TXLNG	13.88	10.76	10.68	11.39
ENSG00000086730	171.571	1.38511	2.61191	0.328369	4.21815	2.46319e-05	0.000842986	protein_coding	KNOWN	LAT2	2.67	2.3	4.88	5.74
ENSG00000086758	17418.3	-0.196818	0.872473	0.18269	-1.07733	0.281333	0.625224	protein_coding	KNOWN	HUWE1	70.41	67.68	54.43	66.3
ENSG00000086827	949.469	-0.144057	0.904971	0.221395	-0.650678	0.515255	0.806353	protein_coding	KNOWN	ZW10	10.45	13.15	10.51	10.06
ENSG00000086848	928.472	0.148597	1.10849	0.211219	0.703521	0.481731	0.783772	protein_coding	KNOWN	ALG9	21.26	15.44	18.09	23.6
ENSG00000087008	392.375	0.0607242	1.04299	0.29698	0.204472	0.837985	0.951807	protein_coding	KNOWN	ACOX3	9.26	10.28	9.19	9.23
ENSG00000087053	1532.2	0.0231655	1.01619	0.215028	0.107733	0.914208	0.976439	protein_coding	KNOWN	MTMR2	15.37	15.2	17.18	12.7
ENSG00000087074	1616.18	0.558013	1.47224	0.32738	1.70448	0.088291	0.348016	protein_coding	KNOWN	PPP1R15A	23.22	16.21	20.36	35.54
ENSG00000087076	37.482	1.35237	2.55332	0.697233	1.93963	0.052425	0.258138	protein_coding	KNOWN	HSD17B14	0.98	0.65	1.33	2.88
ENSG00000087077	1757.99	-0.526453	0.69426	0.199665	-2.63668	0.0083723	0.0787121	protein_coding	KNOWN	TRIP6	38.84	42.32	25.81	28.5
ENSG00000087085	58.5869	-0.125571	0.916641	0.503078	-0.249605	0.802893	0.938875	protein_coding	KNOWN	ACHE	1.35	1.01	1.15	1.28
ENSG00000087086	39597.6	0.718542	1.64552	0.217947	3.29687	0.00097768	0.0164709	protein_coding	KNOWN	FTL	1566.18	1296.13	2021.29	2517.04
ENSG00000087087	4178.38	0.206335	1.15375	0.256866	0.80328	0.421813	0.743564	protein_coding	KNOWN	SRRT	71.9	52.9	59.44	85.27
ENSG00000087088	977.831	-1.3872	0.382307	0.237542	-5.83979	5.22677e-09	5.33983e-07	protein_coding	KNOWN	BAX	68.94	83.81	24.66	27.15
ENSG00000087095	656.583	-0.798839	0.574811	0.233862	-3.41586	0.000635806	0.0119796	protein_coding	KNOWN	NLK	9.16	8.58	6.13	4.75
ENSG00000087111	1832.2	-0.34485	0.78739	0.205861	-1.67516	0.0939031	0.360354	protein_coding	KNOWN	PIGS	31.16	32.84	22.76	24.89
ENSG00000087116	145.185	1.4778	2.78525	0.345752	4.27417	1.9185e-05	0.000691586	protein_coding	KNOWN	ADAMTS2	0.49	0.88	1.72	2
ENSG00000087152	2609.28	-0.0303209	0.979202	0.194678	-0.155749	0.876231	0.963132	protein_coding	KNOWN	ATXN7L3	24.3	29.97	27.39	25.13
ENSG00000087157	883.482	0.140731	1.10246	0.216473	0.650107	0.515623	0.806564	protein_coding	KNOWN	PGS1	14.24	15.38	19.13	16.36
ENSG00000087191	4395.36	-0.0919055	0.938283	0.196245	-0.46832	0.639556	0.871402	protein_coding	KNOWN	PSMC5	114.23	119.94	102.47	113.51
ENSG00000087206	860.634	0.208973	1.15587	0.20915	0.999153	0.317721	0.661035	protein_coding	KNOWN	UIMC1	17.79	12.75	14.74	21.39
ENSG00000087253	908.567	0.196577	1.14598	0.219188	0.89684	0.369804	0.705247	protein_coding	KNOWN	LPCAT2	9.93	6.55	7.58	9.86
ENSG00000087263	2448.69	-0.4075	0.753929	0.205159	-1.98627	0.0470038	0.242763	protein_coding	KNOWN	OGFOD1	44.84	51.68	35.63	34.35
ENSG00000087266	1050.35	-0.127472	0.915434	0.200164	-0.636839	0.52423	0.812562	protein_coding	KNOWN	SH3BP2	13.04	8.55	9.32	12.32
ENSG00000087269	3329.81	0.131661	1.09555	0.219099	0.600922	0.547892	0.826071	protein_coding	KNOWN	NOP14	33.49	31.11	30.63	39.42
ENSG00000087274	5501.5	-0.0275587	0.981079	0.201607	-0.136695	0.891272	0.969388	protein_coding	KNOWN	ADD1	68.22	62.34	57.09	68.29
ENSG00000087299	362.835	0.408127	1.32696	0.325729	1.25297	0.210218	0.544271	protein_coding	KNOWN	L2HGDH	4.14	5.31	6.71	4.43
ENSG00000087301	132.053	0.555614	1.46979	0.364112	1.52594	0.127024	0.424091	protein_coding	KNOWN	TXNDC16	0.77	0.84	1.3	0.99
ENSG00000087302	4221.74	-0.0233303	0.983959	0.245074	-0.095197	0.924158	0.978551	protein_coding	KNOWN	C14orf166	194.33	135.93	134.16	175.45
ENSG00000087303	10.9034	-0.192857	0.874871	1.07699	-0.17907	0.857883	NA	protein_coding	KNOWN	NID2	0.29	0.32	0.35	0.14
ENSG00000087338	1029.02	-0.0972857	0.93479	0.242793	-0.400694	0.688645	0.89476	protein_coding	KNOWN	GMCL1	8.5	9.13	9.3	6.71
ENSG00000087365	11944.8	0.337173	1.26328	0.258752	1.30308	0.192548	0.522659	protein_coding	KNOWN	SF3B2	169.07	139.38	155.33	229.97
ENSG00000087448	1164.4	-0.93166	0.524255	0.215726	-4.31872	1.56935e-05	0.000589064	protein_coding	KNOWN	KLHL42	9.18	9.58	4.94	4.38
ENSG00000087460	30617.3	0.283065	1.21678	0.191057	1.48157	0.138454	0.445003	protein_coding	KNOWN	GNAS	639.66	630.14	704	765.7
ENSG00000087470	3197.71	-0.0971403	0.934884	0.183515	-0.529331	0.596576	0.85211	protein_coding	KNOWN	DNM1L	51.45	36.68	31.61	42.86
ENSG00000087494	19.6429	-0.516201	0.699211	0.906732	-0.569298	0.569154	NA	protein_coding	KNOWN	PTHLH	0.9	0.62	0.37	1.1
ENSG00000087502	2066.13	0.298611	1.22996	0.221826	1.34615	0.178255	0.504616	protein_coding	KNOWN	ERGIC2	88.04	66.39	76.54	97.59
ENSG00000087510	325.25	0.591961	1.50729	0.2787	2.12401	0.0336695	0.198025	protein_coding	KNOWN	TFAP2C	3.74	2.89	4.44	4.85
ENSG00000087586	3407.5	0.727604	1.65589	0.178755	4.07039	4.6935e-05	0.00146454	protein_coding	KNOWN	AURKA	46.69	49.99	78.56	75.55
ENSG00000087589	3.64409	-0.830388	0.562378	2.20607	-0.376411	0.706612	NA	protein_coding	KNOWN	CASS4	0.14	0	0.04	0.04
ENSG00000087842	628.348	0.376319	1.29803	0.229228	1.64168	0.100657	0.373187	protein_coding	KNOWN	PIR	17.25	15.3	20.33	20.27
ENSG00000087884	165.655	-0.199795	0.870675	0.386422	-0.517037	0.60513	0.856615	protein_coding	KNOWN	AAMDC	12.56	20.51	15.8	11.94
ENSG00000087903	248.99	0.348575	1.2733	0.317391	1.09825	0.272095	0.615258	protein_coding	KNOWN	RFX2	2.7	2.11	2.55	3.37
ENSG00000087916	4.28417	-1.15719	0.448384	1.73291	-0.667774	0.504278	NA	protein_coding	KNOWN	SLC6A14	0.02	0.07	0.02	0.22
ENSG00000087995	1838.29	0.00348422	1.00242	0.196382	0.0177421	0.985845	0.997196	protein_coding	KNOWN	METTL2A	30.06	34.86	34.76	28.12
ENSG00000088002	55.3459	1.05577	2.07882	0.52465	2.01233	0.0441856	0.234297	protein_coding	KNOWN	SULT2B1	0.97	1.73	2.31	2.24
ENSG00000088035	435.706	-0.46641	0.723763	0.329789	-1.41427	0.157283	0.472828	protein_coding	KNOWN	ALG6	6.62	9.33	6.68	4.17
ENSG00000088038	2651	0.0530966	1.03749	0.358007	0.148312	0.882097	0.965623	protein_coding	KNOWN	CNOT3	46.98	27.33	25.43	47.33
ENSG00000088053	0.745587	-0.792557	0.57732	3.92012	-0.202177	0.839779	NA	protein_coding	KNOWN	GP6	0.01	0.02	0.02	0
ENSG00000088179	629.69	0.177956	1.13128	0.268444	0.662916	0.507385	0.802069	protein_coding	KNOWN	PTPN4	7.16	6.53	11.87	7.53
ENSG00000088205	4382.93	-0.0688655	0.953387	0.187599	-0.36709	0.713552	0.905648	protein_coding	KNOWN	DDX18	59.96	56.53	47.19	56.69
ENSG00000088247	9419.51	0.290584	1.22314	0.222952	1.30335	0.192457	0.522659	protein_coding	KNOWN	KHSRP	154.58	207.52	222.74	208.89
ENSG00000088256	3026.3	-0.250187	0.840788	0.188026	-1.3306	0.183322	0.511919	protein_coding	KNOWN	GNA11	30.17	37.52	27.6	24.16
ENSG00000088280	591.67	0.14956	1.10923	0.227585	0.657162	0.511077	0.804097	protein_coding	KNOWN	ASAP3	5.68	6.49	6.27	6.32
ENSG00000088298	826.536	-0.607584	0.656295	0.231894	-2.6201	0.00879042	0.0815316	protein_coding	KNOWN	EDEM2	18.26	21.82	13.51	11.98
ENSG00000088305	663.288	0.463141	1.37854	0.227414	2.03656	0.0416945	0.225363	protein_coding	KNOWN	DNMT3B	4.75	4.64	6.97	5.76
ENSG00000088325	10913.1	0.78546	1.72364	0.242529	3.23862	0.00120107	0.0191801	protein_coding	KNOWN	TPX2	88.57	70.99	113.47	151.72
ENSG00000088340	25.7151	0.435212	1.35211	0.715224	0.608498	0.542857	0.823572	pseudogene	KNOWN	FER1L4	0.35	0.47	0.5	0.44
ENSG00000088356	787.225	-0.0462239	0.968468	0.327512	-0.141137	0.887762	0.968107	protein_coding	KNOWN	PDRG1	15.92	28.33	24.39	16.9
ENSG00000088367	1955.33	0.231662	1.17419	0.24002	0.965177	0.334456	0.676897	protein_coding	KNOWN	EPB41L1	32.71	23.53	20.23	40.36
ENSG00000088386	80.8885	-0.664369	0.630965	0.473922	-1.40185	0.160959	0.478624	protein_coding	KNOWN	SLC15A1	1.18	1.99	0.93	1
ENSG00000088387	1774.34	-0.584386	0.666933	0.218346	-2.67642	0.00744127	0.0727356	protein_coding	KNOWN	DOCK9	28.51	27.69	21.11	17.77
ENSG00000088448	2139.01	1.01004	2.01396	0.296081	3.41135	0.000646413	0.0121462	protein_coding	KNOWN	ANKRD10	26.48	36.42	72.37	52.22
ENSG00000088451	729.759	0.306446	1.23666	0.235699	1.30016	0.193546	0.523115	protein_coding	KNOWN	TGDS	13.64	12.19	17.11	14.23
ENSG00000088538	252.155	0.0897896	1.06421	0.285531	0.314465	0.753168	0.919694	protein_coding	KNOWN	DOCK3	0.91	1.04	1.08	0.93
ENSG00000088543	354.291	0.224856	1.16866	0.253722	0.88623	0.375494	0.710279	protein_coding	KNOWN	C3orf18	6.19	6.78	8.48	7.93
ENSG00000088682	1970.02	-0.0852201	0.942641	0.249554	-0.34149	0.732735	0.912659	protein_coding	KNOWN	COQ9	62.3	43.16	40.71	54.01
ENSG00000088726	195.432	0.000500727	1.00035	0.304152	0.00164631	0.998686	0.999846	protein_coding	KNOWN	TMEM40	8.89	5.29	5.32	8.64
ENSG00000088727	163.916	-0.460117	0.726928	0.354696	-1.29721	0.194558	0.524272	protein_coding	KNOWN	KIF9	6.17	10.67	9.37	6.61
ENSG00000088766	697.403	-0.0637159	0.956797	0.301919	-0.211037	0.832859	0.949537	protein_coding	KNOWN	CRLS1	13.46	24.59	25.14	11.61
ENSG00000088808	362.053	0.280846	1.21491	0.321486	0.873589	0.382342	0.715286	protein_coding	KNOWN	PPP1R13B	3.18	2.32	2.85	3.52
ENSG00000088812	2021.5	-0.189819	0.876716	0.1906	-0.995905	0.319296	0.662618	protein_coding	KNOWN	ATRN	9.03	8.97	8.22	6.96
ENSG00000088826	1166.45	0.324712	1.25241	0.214877	1.51115	0.13075	0.431412	protein_coding	KNOWN	SMOX	20.92	19.29	21.88	27.27
ENSG00000088832	8270.19	-0.645601	0.639227	0.180688	-3.57302	0.000352894	0.00756939	protein_coding	KNOWN	FKBP1A	379.18	282.52	178.13	209.99
ENSG00000088833	2739.52	0.154191	1.1128	0.311132	0.49558	0.620191	0.863833	protein_coding	KNOWN	NSFL1C	89.36	58.23	59.71	103.51
ENSG00000088836	466.721	0.134059	1.09738	0.244034	0.549344	0.582769	0.844666	protein_coding	KNOWN	SLC4A11	5.29	5.78	5.16	6.12
ENSG00000088854	299.112	-0.0170902	0.988224	0.272466	-0.0627241	0.949986	0.986196	protein_coding	KNOWN	C20orf194	1.46	1.56	1.55	1.29
ENSG00000088876	324.329	-0.365232	0.776344	0.285282	-1.28025	0.200457	0.531673	protein_coding	KNOWN	ZNF343	5.1	3.5	3.23	4.2
ENSG00000088881	154.448	-0.480946	0.716507	0.343447	-1.40035	0.161409	0.479259	protein_coding	KNOWN	EBF4	3.28	3.46	2.83	2.9
ENSG00000088882	8.90419	0.565038	1.47943	1.21042	0.466812	0.640634	NA	protein_coding	KNOWN	CPXM1	0.15	0.06	0.18	0.13
ENSG00000088888	2191.76	-0.332998	0.793885	0.206342	-1.61382	0.106567	0.384388	protein_coding	KNOWN	MAVS	25.05	21.37	14.8	18.89
ENSG00000088899	267.601	0.136357	1.09913	0.317165	0.429925	0.667251	0.885102	protein_coding	KNOWN	LZTS3	2.3	1.8	1.94	2.44
ENSG00000088930	7030.68	-0.128444	0.914818	0.21654	-0.593163	0.553072	0.82791	protein_coding	KNOWN	XRN2	73.67	76.19	77.05	55.43
ENSG00000088970	215.807	0.458209	1.37384	0.347691	1.31786	0.187549	0.516819	processed_transcript	KNOWN	PLK1S1	3.48	3.01	4.11	4.88
ENSG00000088986	6003.88	0.0536753	1.03791	0.176081	0.304833	0.760493	0.922057	protein_coding	KNOWN	DYNLL1	378.65	358.34	368.9	368.49
ENSG00000088992	712.311	0.679912	1.60204	0.239615	2.83752	0.00454661	0.0505701	protein_coding	KNOWN	TESC	20.36	24.32	33.01	37.86
ENSG00000089006	3602.72	0.394506	1.31449	0.189605	2.08068	0.0374634	0.211987	protein_coding	KNOWN	SNX5	70.86	69.87	99.85	92.09
ENSG00000089009	36008.4	0.46018	1.37571	0.178508	2.57792	0.00993974	0.0881601	protein_coding	KNOWN	RPL6	1379.63	1286.62	1683.49	1852.36
ENSG00000089022	882.051	-0.325339	0.798111	0.221002	-1.47211	0.140992	0.449326	protein_coding	KNOWN	MAPKAPK5	25.96	22.85	18.73	19.53
ENSG00000089041	27.6231	0.0712346	1.05062	0.705694	0.100943	0.919596	0.977385	protein_coding	KNOWN	P2RX7	0.39	0.65	0.55	0.4
ENSG00000089048	923.398	0.211436	1.15784	0.290476	0.727894	0.466679	0.774533	protein_coding	KNOWN	ESF1	11.2	7.4	9.23	11.58
ENSG00000089050	448.949	-0.487809	0.713107	0.246582	-1.97829	0.0478965	0.245181	protein_coding	KNOWN	RBBP9	7.22	6.27	4.84	5.13
ENSG00000089053	2832.96	0.0178159	1.01243	0.214753	0.08296	0.933883	0.981342	protein_coding	KNOWN	ANAPC5	51.46	47.55	49.69	48.16
ENSG00000089057	629.962	-0.225102	0.855535	0.258116	-0.872094	0.383157	0.716349	protein_coding	KNOWN	SLC23A2	3.51	3.47	3.48	2.36
ENSG00000089060	948.235	-0.229019	0.853215	0.204939	-1.11749	0.263783	0.60636	protein_coding	KNOWN	SLC8B1	12.21	12.35	11.5	12.12
ENSG00000089063	3123.15	-0.210223	0.864403	0.196062	-1.07223	0.283616	0.627167	protein_coding	KNOWN	TMEM230	90.69	76.97	68.48	70.94
ENSG00000089091	56.7085	0.077514	1.0552	0.496328	0.156175	0.875895	0.963117	protein_coding	KNOWN	DZANK1	0.61	0.74	0.73	0.76
ENSG00000089094	1650.94	0.196381	1.14582	0.189151	1.03822	0.299165	0.645262	protein_coding	KNOWN	KDM2B	17.35	15.56	17.12	20.58
ENSG00000089116	70.7817	0.196958	1.14628	0.459445	0.428686	0.668152	0.885359	protein_coding	KNOWN	LHX5	0.74	0.84	0.79	0.96
ENSG00000089123	166.324	0.163764	1.12021	0.320282	0.511311	0.609133	0.859008	protein_coding	KNOWN	TASP1	3.38	2.76	3.42	3.14
ENSG00000089127	789.782	-4.51742	0.0436639	0.273829	-16.4972	3.84067e-61	8.82841e-58	protein_coding	KNOWN	OAS1	36.82	39.29	2.63	1.25
ENSG00000089154	11042.5	-0.191531	0.875676	0.234347	-0.817296	0.413759	0.737664	protein_coding	KNOWN	GCN1L1	44.91	56.57	49.38	45.32
ENSG00000089157	133802	0.249793	1.18904	0.18664	1.33837	0.180777	0.508848	protein_coding	KNOWN	RPLP0	5985.7	3739.91	4266.49	6579.76
ENSG00000089159	11065.6	-0.406294	0.754559	0.181214	-2.24207	0.0249571	0.164065	protein_coding	KNOWN	PXN	181.39	138.16	102.51	119.83
ENSG00000089163	95.8119	-0.634984	0.643948	0.40818	-1.55565	0.119792	0.410173	protein_coding	KNOWN	SIRT4	3.95	3.66	2.62	2.03
ENSG00000089169	3.97738	3.95303	15.4875	2.22557	1.77619	0.0757014	NA	protein_coding	KNOWN	RPH3A	0	0.02	0.08	0.1
ENSG00000089177	238.915	0.181402	1.13399	0.284439	0.637753	0.523634	0.812117	protein_coding	KNOWN	KIF16B	1.42	1.53	1.71	1.74
ENSG00000089195	773.598	-0.317943	0.802213	0.288837	-1.10077	0.270997	0.614433	protein_coding	KNOWN	TRMT6	15.5	11.46	8.35	12.4
ENSG00000089220	8098.6	0.194603	1.14441	0.224554	0.866619	0.386151	0.718792	protein_coding	KNOWN	PEBP1	182.31	162.58	171.31	200.62
ENSG00000089234	836.932	-0.222449	0.857109	0.230389	-0.965537	0.334276	0.676895	protein_coding	KNOWN	BRAP	12.97	11.04	8.5	10.38
ENSG00000089248	7057.05	-0.118096	0.921403	0.237363	-0.497534	0.618813	0.863331	protein_coding	KNOWN	ERP29	180.01	142.45	123.04	166.57
ENSG00000089280	7028.43	-0.105509	0.929477	0.189674	-0.556265	0.578029	0.84228	protein_coding	KNOWN	FUS	144.91	167.11	135.76	146.73
ENSG00000089289	2607.76	-0.0241534	0.983397	0.187486	-0.128828	0.897494	0.970994	protein_coding	KNOWN	IGBP1	55.11	62.26	56.71	54.4
ENSG00000089327	5906.78	0.193658	1.14366	0.380603	0.50882	0.610879	0.859512	protein_coding	KNOWN	FXYD5	330.1	189.37	180.21	392.79
ENSG00000089335	227.026	-0.597599	0.660853	0.307233	-1.9451	0.0517629	0.256067	protein_coding	KNOWN	ZNF302	5.09	3.86	2.09	3.13
ENSG00000089351	1895.28	-0.264794	0.832318	0.204381	-1.29559	0.195116	0.52457	protein_coding	KNOWN	GRAMD1A	29.81	41.83	25.85	25.57
ENSG00000089356	155.215	-0.896964	0.537016	0.352228	-2.54654	0.0108795	0.0934894	protein_coding	KNOWN	FXYD3	14.46	20.04	9.11	7.79
ENSG00000089472	18.3839	-1.10819	0.463876	0.83927	-1.32042	0.186695	NA	protein_coding	KNOWN	HEPH	0.44	0.2	0.21	0.1
ENSG00000089486	168.2	-0.64746	0.638403	0.334614	-1.93495	0.0529968	0.259892	protein_coding	KNOWN	CDIP1	3.04	2.89	1.69	2
ENSG00000089505	50.2815	1.07508	2.10684	0.604509	1.77844	0.0753321	0.318608	protein_coding	KNOWN	CMTM1	2.65	1.9	2.25	7.09
ENSG00000089597	21161.1	0.0197928	1.01381	0.180443	0.10969	0.912655	0.97605	protein_coding	KNOWN	GANAB	213.66	216.64	189.38	219.04
ENSG00000089639	520.205	-0.654917	0.635112	0.252669	-2.59199	0.00954227	0.085748	protein_coding	KNOWN	GMIP	8.16	8.68	4.28	5.25
ENSG00000089682	291.958	-0.294882	0.815139	0.29053	-1.01498	0.310116	0.653495	protein_coding	KNOWN	RBM41	6.11	5.04	4.29	5.55
ENSG00000089685	5897.81	0.959382	1.94448	0.178271	5.3816	7.38263e-08	5.78529e-06	protein_coding	KNOWN	BIRC5	80.59	71.72	124.51	154.16
ENSG00000089692	15.1179	1.28261	2.43279	1.08647	1.18053	0.23779	NA	protein_coding	KNOWN	LAG3	0.37	0.1	0.8	0.92
ENSG00000089693	10452.9	0.11602	1.08374	0.313986	0.369506	0.711751	0.905042	protein_coding	KNOWN	MLF2	329.41	202.77	202.68	348.22
ENSG00000089723	851.654	-1.0547	0.481398	0.208886	-5.04915	4.43785e-07	2.73245e-05	protein_coding	KNOWN	OTUB2	10.27	10.11	4.93	4.64
ENSG00000089737	7946.04	-0.250069	0.840856	0.234372	-1.06697	0.285984	0.62981	protein_coding	KNOWN	DDX24	202.36	119.24	94.96	171.41
ENSG00000089775	186.662	0.453529	1.36939	0.327086	1.38657	0.165571	0.485451	protein_coding	KNOWN	ZBTB25	3.77	4.17	7.14	5.78
ENSG00000089818	1591.14	-0.0891243	0.940093	0.197785	-0.450613	0.652268	0.876673	protein_coding	KNOWN	NECAP1	35.04	21.98	21.1	30.48
ENSG00000089820	711.313	-0.480844	0.716558	0.260528	-1.84565	0.0649431	0.291849	protein_coding	KNOWN	ARHGAP4	17.8	10.58	7.55	15.23
ENSG00000089847	52.2465	0.0729114	1.05184	0.587312	0.124144	0.901201	0.971937	protein_coding	KNOWN	ANKRD24	0.58	0.39	0.49	0.6
ENSG00000089876	1694	0.222183	1.1665	0.252344	0.880476	0.378601	0.712564	protein_coding	KNOWN	DHX32	16.67	22.39	25.69	17.98
ENSG00000089902	1668.33	0.279078	1.21342	0.216164	1.29104	0.196688	0.525926	protein_coding	KNOWN	RCOR1	10.9	9.68	12.37	9.68
ENSG00000089916	1853.39	0.127388	1.09231	0.189682	0.671586	0.501847	0.798439	protein_coding	KNOWN	GPATCH2L	7.42	10.2	10.3	7.59
ENSG00000090006	2367.92	-0.266861	0.831126	0.209508	-1.27375	0.202751	0.534877	protein_coding	KNOWN	LTBP4	53.48	42.28	40.54	50.12
ENSG00000090013	1737.31	0.140491	1.10228	0.191174	0.734885	0.46241	0.772389	protein_coding	KNOWN	BLVRB	76.57	83.11	87.17	83.12
ENSG00000090020	838.562	-0.334541	0.793037	0.238361	-1.4035	0.160467	0.478018	protein_coding	KNOWN	SLC9A1	13.03	8.32	5.91	9.16
ENSG00000090054	3576.15	0.357596	1.28129	0.22693	1.5758	0.115072	0.400761	protein_coding	KNOWN	SPTLC1	71.24	58.91	73.21	86.66
ENSG00000090060	10821.3	0.20355	1.15153	0.171522	1.18673	0.235333	0.576922	protein_coding	KNOWN	PAPOLA	110.46	104.03	120.85	120.27
ENSG00000090061	2658.09	0.0528851	1.03734	0.2875	0.183948	0.854054	0.957314	protein_coding	KNOWN	CCNK	49.85	32.21	33.73	48.48
ENSG00000090097	1390.83	-0.322244	0.799825	0.276694	-1.16462	0.244172	0.586465	protein_coding	KNOWN	PCBP4	32.7	26.88	18.68	26.19
ENSG00000090238	70.3939	0.430356	1.34757	0.468273	0.919028	0.358081	0.695792	protein_coding	KNOWN	YPEL3	2.6	3.17	3.32	3.87
ENSG00000090263	1126.11	0.0352219	1.02471	0.246667	0.142791	0.886455	0.967538	protein_coding	KNOWN	MRPS33	62.7	76.05	79.71	58.4
ENSG00000090266	1035.13	0.170988	1.12583	0.334327	0.51144	0.609043	0.858975	protein_coding	KNOWN	NDUFB2	64.64	111.62	123.34	74.4
ENSG00000090273	9283.44	0.283623	1.21725	0.29432	0.963653	0.33522	0.677585	protein_coding	KNOWN	NUDC	189.79	153.94	148.05	253.93
ENSG00000090316	2998.51	-0.266236	0.831486	0.186672	-1.42622	0.153803	0.468165	protein_coding	KNOWN	MAEA	63.24	54.9	46.91	47.77
ENSG00000090339	27.1211	-0.328768	0.796216	0.713266	-0.460932	0.644847	0.872948	protein_coding	KNOWN	ICAM1	0.28	0.39	0.3	0.33
ENSG00000090372	3568.35	-0.00483156	0.996657	0.255991	-0.0188739	0.984942	0.996941	protein_coding	KNOWN	STRN4	45.44	37.63	35.01	46.41
ENSG00000090382	65.3298	-1.06773	0.47707	0.526427	-2.02825	0.0425344	0.228085	protein_coding	KNOWN	LYZ	2.86	1.83	1.74	0.74
ENSG00000090432	1379.09	-0.165821	0.891421	0.219131	-0.756724	0.449215	0.764369	protein_coding	KNOWN	MUL1	19.68	23.18	20.47	16.42
ENSG00000090447	719.972	0.489061	1.40353	0.262718	1.86154	0.0626676	0.286291	protein_coding	KNOWN	TFAP4	11.99	10.25	11.78	22.32
ENSG00000090470	898.209	-0.0741742	0.949886	0.20782	-0.356915	0.721155	0.907961	protein_coding	KNOWN	PDCD7	13.07	12.1	10.6	10.34
ENSG00000090487	2357.96	0.166245	1.12213	0.215875	0.770097	0.441242	0.759348	protein_coding	KNOWN	SPG21	47.85	52.77	61.75	48.25
ENSG00000090512	0	NA	#VALUE!	NA	NA	NA	NA	protein_coding	KNOWN	FETUB	0	0	0	0
ENSG00000090520	2687.6	0.0112321	1.00782	0.189013	0.059425	0.952614	0.986612	protein_coding	KNOWN	DNAJB11	104.9	72.66	70.04	107.5
ENSG00000090530	20.568	1.07731	2.11009	0.828121	1.3009	0.193291	NA	protein_coding	KNOWN	LEPREL1	0.19	0.16	0.33	0.38
ENSG00000090539	242.993	0.497077	1.41135	0.284461	1.74743	0.0805624	0.329708	protein_coding	KNOWN	CHRD	2.34	2.23	3.15	3.31
ENSG00000090554	48.9954	-0.00177949	0.998767	0.560092	-0.00317714	0.997465	0.999643	protein_coding	KNOWN	FLT3LG	1.96	2.25	1.49	2.39
ENSG00000090565	653.574	-0.0351103	0.975957	0.236581	-0.148407	0.882021	0.965617	protein_coding	KNOWN	RAB11FIP3	6.84	6.8	6.26	6.81
ENSG00000090581	529.191	-0.935388	0.522902	0.242218	-3.86177	0.00011257	0.00303829	protein_coding	KNOWN	GNPTG	23.04	21.45	10.65	12.19
ENSG00000090612	234.789	-0.0844011	0.943176	0.381552	-0.221205	0.824933	0.946309	protein_coding	KNOWN	ZNF268	1.94	3.89	5.67	2.01
ENSG00000090615	1967.33	0.141621	1.10314	0.259366	0.546026	0.585048	0.846093	protein_coding	KNOWN	GOLGA3	7.21	10.21	9.44	7.64
ENSG00000090621	7515.51	0.343669	1.26898	0.18431	1.86463	0.0622337	0.285348	protein_coding	KNOWN	PABPC4	143.13	110.68	139.48	167.32
ENSG00000090661	1016.52	-0.221954	0.857403	0.264198	-0.840104	0.40085	0.728588	protein_coding	KNOWN	CERS4	38.41	28.61	25.79	32.18
ENSG00000090674	319.354	-0.104491	0.930133	0.263668	-0.396299	0.691884	0.896161	protein_coding	KNOWN	MCOLN1	7.24	7.22	5.62	7.07
ENSG00000090686	2558.58	-0.0731626	0.950552	0.185382	-0.394659	0.693095	0.89672	protein_coding	KNOWN	USP48	23.33	23.92	21.37	21.44
ENSG00000090776	910.753	-0.378336	0.769324	0.211847	-1.78589	0.0741164	0.314915	protein_coding	KNOWN	EFNB1	11.36	10.36	8.23	7.91
ENSG00000090857	2499.08	-0.548807	0.683585	0.195963	-2.80056	0.00510146	0.0554447	protein_coding	KNOWN	PDPR	15.07	15.11	10.71	8.85
ENSG00000090861	8325.45	0.607775	1.52391	0.199682	3.04372	0.00233674	0.030959	protein_coding	KNOWN	AARS	65.77	72.66	93.62	110.4
ENSG00000090863	13099.8	0.134595	1.09778	0.176749	0.7615	0.446358	0.762586	protein_coding	KNOWN	GLG1	86.82	100.33	100.22	99.28
ENSG00000090889	2083.04	0.585153	1.5002	0.195385	2.99487	0.00274565	0.0346776	protein_coding	KNOWN	KIF4A	12.57	14.36	19.57	19.71
ENSG00000090905	2291.2	-0.0298862	0.979498	0.18416	-0.162284	0.871082	0.961989	protein_coding	KNOWN	TNRC6A	13.64	11.88	12.55	11.55
ENSG00000090920	145.92	-2.05	0.241483	0.446011	-4.59631	4.30044e-06	0.00020174	protein_coding	KNOWN	FCGBP	0.36	0.6	0.15	0.08
ENSG00000090924	643.505	-0.2151	0.861486	0.302944	-0.710033	0.477684	0.780687	protein_coding	KNOWN	PLEKHG2	5.84	4.98	4.26	5.66
ENSG00000090971	542.5	0.0826714	1.05898	0.284232	0.290859	0.771159	0.925257	protein_coding	KNOWN	NAT14	14.48	21.77	19.65	16.91
ENSG00000090975	515.653	0.109419	1.07879	0.251461	0.435134	0.663465	0.883156	protein_coding	KNOWN	PITPNM2	3.5	3.14	3.49	4
ENSG00000090989	790.889	0.0292478	1.02048	0.222416	0.131501	0.895379	0.970763	protein_coding	KNOWN	EXOC1	7.8	8.69	8.91	8.76
ENSG00000091009	1818.55	0.243018	1.18347	0.198432	1.22469	0.220691	0.558388	protein_coding	KNOWN	RBM27	12.85	9.64	11.73	11.69
ENSG00000091039	5834.78	-0.142734	0.905801	0.25194	-0.566538	0.571028	0.838838	protein_coding	KNOWN	OSBPL8	34.18	43.38	36.54	24.99
ENSG00000091073	1066.48	0.189808	1.14061	0.292261	0.649447	0.51605	0.806865	protein_coding	KNOWN	DTX2	18.64	16.14	16.09	25.87
ENSG00000091106	13.2597	0.129687	1.09406	1.03485	0.125319	0.900271	NA	protein_coding	KNOWN	NLRC4	0.08	0.22	0.15	0.16
ENSG00000091127	1240.52	-0.0421639	0.971197	0.230142	-0.183208	0.854635	0.957314	protein_coding	KNOWN	PUS7	15.3	14.83	15.58	12.37
ENSG00000091136	3331.8	0.244959	1.18506	0.207163	1.18244	0.237029	0.578194	protein_coding	KNOWN	LAMB1	29.64	27.75	27.94	36.97
ENSG00000091137	19.4031	0.69884	1.6232	0.824448	0.847647	0.396635	NA	protein_coding	KNOWN	SLC26A4	0.17	0.1	0.2	0.13
ENSG00000091140	3403.39	0.124874	1.09041	0.188622	0.662031	0.507951	0.802605	protein_coding	KNOWN	DLD	49.22	50.51	55.06	49.99
ENSG00000091157	747.022	-0.547093	0.684398	0.262125	-2.08715	0.0368748	0.209817	protein_coding	KNOWN	WDR7	7.93	4.3	3.22	4.33
ENSG00000091164	3271.18	0.251221	1.19021	0.215992	1.1631	0.244788	0.586976	protein_coding	KNOWN	TXNL1	85.39	65.3	80.44	91.77
ENSG00000091262	39.1148	-0.316077	0.803251	0.63605	-0.496937	0.619233	0.8634	protein_coding	KNOWN	ABCC6	0.83	0.79	1.02	0.4
ENSG00000091317	4054.92	-1.51058	0.35097	0.231895	-6.51406	7.31453e-11	1.12091e-08	protein_coding	KNOWN	CMTM6	47.06	61.15	20.99	15.69
ENSG00000091409	9526.05	0.270889	1.20655	0.17868	1.51606	0.129505	0.428329	protein_coding	KNOWN	ITGA6	57.83	53.93	64.56	66.4
ENSG00000091428	4.91534	2.08395	4.23968	1.60928	1.29496	0.195333	NA	protein_coding	KNOWN	RAPGEF4	0.12	0.02	0.34	0.09
ENSG00000091436	1846.9	0.709437	1.63517	0.194123	3.65458	0.000257605	0.00591162	protein_coding	KNOWN	MLTK	10.65	9.36	15.52	13.38
ENSG00000091483	1627.91	0.212019	1.15831	0.297199	0.71339	0.475604	0.779293	protein_coding	KNOWN	FH	24.35	38.46	41.74	27.62
ENSG00000091490	3209.11	-0.0494676	0.966293	0.180823	-0.273569	0.784416	0.9317	protein_coding	KNOWN	SEL1L3	52.27	26	25.34	47.88
ENSG00000091527	6082.03	0.573279	1.4879	0.17911	3.2007	0.00137092	0.0211024	protein_coding	KNOWN	CDV3	64.11	67.74	97.9	87.54
ENSG00000091536	18.2153	-1.01573	0.494578	0.935055	-1.08628	0.277356	NA	protein_coding	KNOWN	MYO15A	0.41	0.86	0.07	0.46
ENSG00000091542	4412.19	-0.136072	0.909994	0.189103	-0.719562	0.471795	0.778069	protein_coding	KNOWN	ALKBH5	63.27	65.48	58.79	53.85
ENSG00000091592	159.152	-0.472344	0.720792	0.332859	-1.41905	0.155883	0.47095	protein_coding	KNOWN	NLRP1	1.93	1.53	1.12	1.32
ENSG00000091622	138.531	0.348108	1.27289	0.405035	0.85945	0.390092	0.721297	protein_coding	KNOWN	PITPNM3	0.65	0.53	0.71	0.94
ENSG00000091640	1327.51	0.248726	1.18816	0.246621	1.00854	0.313196	0.656474	protein_coding	KNOWN	SPAG7	50.07	43.58	45.51	61.09
ENSG00000091651	846.79	0.33155	1.25836	0.247607	1.33902	0.180565	0.508729	protein_coding	KNOWN	ORC6	16.8	18.29	24.6	17.43
ENSG00000091656	908.656	-0.113316	0.924461	0.239168	-0.473791	0.635649	0.869429	protein_coding	KNOWN	ZFHX4	2.7	3.29	1.91	2.26
ENSG00000091732	927.088	0.0675776	1.04796	0.215278	0.313909	0.75359	0.919699	protein_coding	KNOWN	ZC3HC1	16.98	17.74	18.65	16.93
ENSG00000091844	106.298	1.10277	2.14767	0.438092	2.51721	0.0118289	0.098965	protein_coding	KNOWN	RGS17	1.41	1.67	4.03	2.38
ENSG00000091879	22.7167	0.547836	1.46189	0.753939	0.726632	0.467451	0.775126	protein_coding	KNOWN	ANGPT2	0.13	0.13	0.16	0.24
ENSG00000091947	1061.52	0.0712028	1.05059	0.203391	0.350078	0.72628	0.909631	protein_coding	KNOWN	TMEM101	24.03	27.06	26.28	25.13
ENSG00000091986	7.46232	1.35627	2.56022	1.30996	1.03535	0.300506	NA	protein_coding	KNOWN	CCDC80	0.05	0.11	0.16	0.12
ENSG00000092010	4547.61	-0.286305	0.82	0.181351	-1.57873	0.114399	0.399559	protein_coding	KNOWN	PSME1	206.11	214.42	160.25	171.49
ENSG00000092020	539.577	-0.229626	0.852856	0.237508	-0.966813	0.333637	0.676198	protein_coding	KNOWN	PPP2R3C	14.53	14.89	12.61	11.61
ENSG00000092036	728.422	0.134465	1.09769	0.273281	0.49204	0.622691	0.865467	protein_coding	KNOWN	HAUS4	16.54	22.33	26.39	20.58
ENSG00000092068	498.943	-0.135221	0.910531	0.28726	-0.470726	0.637836	0.870454	protein_coding	KNOWN	SLC7A8	8.76	6.34	5.91	6.56
ENSG00000092094	322.219	-0.502358	0.705952	0.260521	-1.92828	0.0538201	0.262477	protein_coding	KNOWN	OSGEP	9.25	6.81	5.71	6.5
ENSG00000092096	131.738	0.070096	1.04979	0.407284	0.172106	0.863354	0.960009	protein_coding	KNOWN	SLC22A17	1.56	2.4	2.67	1.84
ENSG00000092098	1692.44	-0.786351	0.579809	0.197979	-3.97189	7.1306e-05	0.00210589	protein_coding	KNOWN	RNF31	50.11	42.75	22.9	32.75
ENSG00000092108	1087.46	-0.124027	0.917623	0.201028	-0.616966	0.537257	0.82049	protein_coding	KNOWN	SCFD1	31.72	23.43	20.5	28.39
ENSG00000092140	1945.51	0.554522	1.46868	0.231774	2.39251	0.0167334	0.125673	protein_coding	KNOWN	G2E3	16.13	19.78	29.32	16.23
ENSG00000092148	5617.84	-0.140974	0.906907	0.247072	-0.570579	0.568285	0.837732	protein_coding	KNOWN	HECTD1	37.34	52.15	43.35	36
ENSG00000092199	45508	0.557273	1.47149	0.298803	1.86502	0.0621784	0.285189	protein_coding	KNOWN	HNRNPC	1268.46	768.25	1016.4	1948.08
ENSG00000092201	9988.5	0.149749	1.10938	0.211831	0.706925	0.479613	0.782263	protein_coding	KNOWN	SUPT16H	82.52	74.25	75.96	91.98
ENSG00000092203	2328.47	-0.0928865	0.937645	0.243859	-0.380902	0.703276	0.9017	protein_coding	KNOWN	TOX4	41.93	28.85	25.72	39.46
ENSG00000092208	455.742	0.383873	1.30484	0.240135	1.59857	0.109916	0.390811	protein_coding	KNOWN	GEMIN2	16.69	15.2	21.52	20.89
ENSG00000092295	15.1233	-0.175995	0.885157	0.929044	-0.189437	0.849751	NA	protein_coding	KNOWN	TGM1	0.73	0.48	0.58	0.6
ENSG00000092330	1055.33	0.0255511	1.01787	0.24528	0.104171	0.917033	0.977315	protein_coding	KNOWN	TINF2	23.56	19.74	18.84	21.2
ENSG00000092421	393.641	-0.405917	0.754756	0.265798	-1.52717	0.12672	0.423279	protein_coding	KNOWN	SEMA6A	4.56	2.24	2.16	3.47
ENSG00000092439	1947.73	0.00780181	1.00542	0.225534	0.0345927	0.972405	0.993143	protein_coding	KNOWN	TRPM7	8.76	10.06	11.44	8
ENSG00000092445	1646	0.164235	1.12057	0.216377	0.759023	0.447839	0.763674	protein_coding	KNOWN	TYRO3	14.2	15.4	17.89	17.66
ENSG00000092470	1212.26	0.384758	1.30564	0.204455	1.88187	0.0598538	0.278604	protein_coding	KNOWN	WDR76	17.69	11.84	17.63	22.15
ENSG00000092529	7.029	-0.302376	0.810916	1.32139	-0.228831	0.819	NA	protein_coding	KNOWN	CAPN3	0.18	0.16	0.25	0.22
ENSG00000092531	1184.19	-0.361031	0.778608	0.219874	-1.64199	0.100592	0.373094	protein_coding	KNOWN	SNAP23	30.6	23.58	20.37	21.23
ENSG00000092621	3203.79	1.2058	2.30665	0.184709	6.52809	6.66129e-11	1.04687e-08	protein_coding	KNOWN	PHGDH	35.62	38.92	81.06	84.35
ENSG00000092758	915.621	0.236692	1.17829	0.255426	0.926657	0.354105	0.692026	protein_coding	KNOWN	COL9A3	19.67	16.93	16.14	23.78
ENSG00000092820	75490.7	0.569177	1.48368	0.21923	2.59626	0.00942459	0.0851228	protein_coding	KNOWN	EZR	737.96	693.32	852.83	1237.69
ENSG00000092841	15410.6	-0.00762072	0.994732	0.195957	-0.0388897	0.968978	0.991643	protein_coding	KNOWN	MYL6	1068.63	990.94	915.97	1085.99
ENSG00000092847	3022.56	-0.251323	0.840126	0.191059	-1.31542	0.188368	0.517788	protein_coding	KNOWN	AGO1	12.61	13.04	8.28	7.85
ENSG00000092853	1131.06	-0.135843	0.910138	0.246927	-0.550136	0.582226	0.844559	protein_coding	KNOWN	CLSPN	13.97	12.06	9.44	12.54
ENSG00000092871	1425.1	-0.157101	0.896826	0.195635	-0.803029	0.421958	0.743669	protein_coding	KNOWN	RFFL	13.17	15.66	10.08	8.89
ENSG00000092929	257.626	-0.49357	0.710265	0.279442	-1.76627	0.0773503	0.322106	protein_coding	KNOWN	UNC13D	2.91	2.65	1.95	3.05
ENSG00000092931	368.419	-0.213246	0.862594	0.336022	-0.63462	0.525676	0.813433	protein_coding	KNOWN	MFSD11	7.34	9.28	9.05	6.54
ENSG00000092964	3457.31	-0.0922629	0.93805	0.256141	-0.360204	0.718694	0.906776	protein_coding	KNOWN	DPYSL2	22.51	31.16	28.8	20.06
ENSG00000092969	4.71937	1.56025	2.94905	1.68448	0.926248	0.354317	NA	protein_coding	KNOWN	TGFB2	0.02	0.17	0.12	0.15
ENSG00000092978	514.833	0.462803	1.37822	0.229643	2.01532	0.0438711	0.233168	protein_coding	KNOWN	GPATCH2	3.79	3.8	5.8	5.2
ENSG00000093000	3753.81	0.0474795	1.03346	0.182834	0.259687	0.795105	0.935195	protein_coding	KNOWN	NUP50	32.91	27.27	30.2	30.57
ENSG00000093009	599.253	-0.0496306	0.966184	0.257873	-0.192461	0.847381	0.955451	protein_coding	KNOWN	CDC45	15.22	13	9.77	17.38
ENSG00000093010	1595.73	-0.547415	0.684245	0.190866	-2.86806	0.00412999	0.0472704	protein_coding	KNOWN	COMT	62.51	79.7	49.73	39.44
ENSG00000093100	228.955	-0.264466	0.832507	0.386731	-0.683851	0.494069	0.793364	processed_transcript	NOVEL	XXbac-B461K10.4	1.39	2.62	1.85	1.36
ENSG00000093144	1646.37	-0.547359	0.684272	0.206016	-2.65688	0.00788682	0.0755382	protein_coding	KNOWN	ECHDC1	45.07	47.76	30.94	29.61
ENSG00000093167	1010.94	0.0122892	1.00855	0.247662	0.0496211	0.960424	0.989372	protein_coding	KNOWN	LRRFIP2	22.6	15.98	13.96	18.86
ENSG00000093183	1310.68	-0.180918	0.882141	0.242017	-0.747545	0.454734	0.768211	protein_coding	KNOWN	SEC22C	16.2	23.44	20.38	15.65
ENSG00000093217	201.247	-0.708097	0.612127	0.326645	-2.16779	0.0301747	0.185404	protein_coding	KNOWN	XYLB	2.93	2.66	1.86	1.49
ENSG00000094631	1344.33	-0.330816	0.795087	0.221591	-1.49291	0.135461	0.440321	protein_coding	KNOWN	HDAC6	23.54	22.91	16.61	23.3
ENSG00000094755	1.739	-4.16101	0.0559001	3.26461	-1.27458	0.202459	NA	protein_coding	KNOWN	GABRP	0.32	0.01	0	0
ENSG00000094804	2950.79	-0.114952	0.923413	0.181355	-0.633851	0.526178	0.813662	protein_coding	KNOWN	CDC6	58.29	45.01	39.04	47.75
ENSG00000094841	279.08	-0.0149545	0.989688	0.306564	-0.0487809	0.961094	0.989372	protein_coding	KNOWN	UPRT	5.88	4.52	4.57	5.44
ENSG00000094880	2273.01	-0.418558	0.748172	0.219027	-1.91099	0.0560061	0.26858	protein_coding	KNOWN	CDC23	33.78	28.73	22.32	23.9
ENSG00000094914	1930.41	0.310335	1.24	0.215348	1.44108	0.149561	0.463567	protein_coding	KNOWN	AAAS	41.94	35.52	41.79	49.22
ENSG00000094916	6437.82	-0.250741	0.840465	0.203316	-1.23326	0.21748	0.554188	protein_coding	KNOWN	CBX5	38.6	30.17	29	34.88
ENSG00000094975	1723.22	0.431495	1.34863	0.22056	1.95636	0.0504226	0.251967	protein_coding	KNOWN	SUCO	8.55	9.37	13.5	10.37
ENSG00000095002	2393.05	-0.0932658	0.937398	0.320486	-0.291013	0.771041	0.925257	protein_coding	KNOWN	MSH2	21.4	32.67	31.82	17.78
ENSG00000095015	849.805	0.380518	1.30181	0.27756	1.37094	0.170394	0.493506	protein_coding	KNOWN	MAP3K1	3.33	3.82	5.8	3.7
ENSG00000095059	2317.95	0.372449	1.29455	0.199181	1.86991	0.0614964	0.282908	protein_coding	KNOWN	DHPS	59.84	62.12	70.65	80.43
ENSG00000095066	691.618	0.209366	1.15618	0.274221	0.763495	0.445168	0.762527	protein_coding	KNOWN	HOOK2	10.33	9.79	12.5	14.65
ENSG00000095139	8712.34	0.139754	1.10172	0.183071	0.76339	0.445231	0.762527	protein_coding	KNOWN	ARCN1	105.99	98.49	111.32	108.65
ENSG00000095203	772.946	0.14659	1.10695	0.210677	0.695803	0.486552	0.787344	protein_coding	KNOWN	EPB41L4B	6.48	6.72	7.26	6.75
ENSG00000095209	994.88	0.164108	1.12047	0.28828	0.569267	0.569175	0.838324	protein_coding	KNOWN	TMEM38B	12.05	18.36	17.52	12.92
ENSG00000095261	2545.26	-0.353674	0.782588	0.188791	-1.87337	0.0610178	0.281574	protein_coding	KNOWN	PSMD5	31.84	31.35	22.93	24.34
ENSG00000095303	98.0255	0.445667	1.36194	0.411233	1.08373	0.278483	0.622038	protein_coding	KNOWN	PTGS1	0.58	0.73	0.9	0.7
ENSG00000095319	5864.8	-0.257379	0.836606	0.218492	-1.17798	0.238806	0.58027	protein_coding	KNOWN	NUP188	39.37	45.41	37.9	28.5
ENSG00000095321	742.671	-0.189364	0.876992	0.260681	-0.726421	0.467581	0.775126	protein_coding	KNOWN	CRAT	11.83	11.46	9.49	12.11
ENSG00000095370	53.0088	0.466216	1.38148	0.512492	0.909705	0.362978	0.699438	protein_coding	KNOWN	SH2D3C	0.53	0.71	0.91	0.92
ENSG00000095380	1526.99	0.391715	1.31195	0.232097	1.68772	0.0914642	0.354851	protein_coding	KNOWN	NANS	46.67	42.22	49.3	63.31
ENSG00000095383	426.462	-0.770721	0.586124	0.246203	-3.13042	0.00174554	0.025132	protein_coding	KNOWN	TBC1D2	5.68	7.43	3.74	3.49
ENSG00000095397	330.327	0.819935	1.76533	0.319788	2.564	0.0103475	0.0904962	protein_coding	KNOWN	DFNB31	3.46	2.83	4.57	6.56
ENSG00000095464	0.211422	-1.21959	0.429404	4.99012	-0.244402	0.80692	NA	protein_coding	KNOWN	PDE6C	0.01	0	0	0
ENSG00000095485	1327.47	0.268487	1.20454	0.25147	1.06767	0.28567	0.62981	protein_coding	KNOWN	CWF19L1	19.38	21.75	23.89	22.4
ENSG00000095539	1061.17	-0.823292	0.565151	0.231793	-3.55184	0.000382552	0.00805603	protein_coding	KNOWN	SEMA4G	16.78	12.6	6.65	8.08
ENSG00000095564	1404.06	-0.214705	0.861723	0.223756	-0.959547	0.337283	0.679088	protein_coding	KNOWN	BTAF1	6.87	7.26	7.34	5.16
ENSG00000095574	1112.29	-0.0270416	0.981431	0.235554	-0.1148	0.908604	0.974377	protein_coding	KNOWN	IKZF5	10.88	9.72	10.64	8.15
ENSG00000095585	7.04319	-0.0568426	0.961366	1.30841	-0.0434439	0.965348	NA	protein_coding	KNOWN	BLNK	0.11	0.42	0.22	0.29
ENSG00000095587	63.8597	0.373727	1.2957	0.483272	0.773327	0.439329	0.757877	protein_coding	KNOWN	TLL2	0.35	0.42	0.46	0.61
ENSG00000095596	8.63676	0.492769	1.40714	1.19549	0.412191	0.6802	NA	protein_coding	KNOWN	CYP26A1	0.09	0.16	0.17	0.17
ENSG00000095637	626.998	-0.148416	0.902241	0.245732	-0.603974	0.545861	0.825404	protein_coding	KNOWN	SORBS1	4.8	4.27	3.85	3.3
ENSG00000095739	309.404	0.316571	1.24537	0.272791	1.16049	0.245849	0.587915	protein_coding	KNOWN	BAMBI	5.42	5.35	5.98	6.94
ENSG00000095752	37.9061	0.859394	1.81428	0.664517	1.29326	0.195921	0.525176	protein_coding	KNOWN	IL11	0.79	0.81	1.2	0.9
ENSG00000095787	5979.98	0.309553	1.23932	0.299159	1.03474	0.300789	0.646108	protein_coding	KNOWN	WAC	82.34	48.28	58.28	97.82
ENSG00000095794	307.012	0.225874	1.16949	0.264242	0.8548	0.392662	0.722753	protein_coding	KNOWN	CREM	10.9	11.93	13.66	11.97
ENSG00000095906	1564.01	0.195645	1.14524	0.215004	0.909961	0.362843	0.699438	protein_coding	KNOWN	NUBP2	42.61	45.44	46.18	56.65
ENSG00000095951	544.324	0.0110422	1.00768	0.233263	0.0473381	0.962244	0.989639	protein_coding	KNOWN	HIVEP1	4.35	3.14	3.52	4.67
ENSG00000095970	0	NA	#VALUE!	NA	NA	NA	NA	protein_coding	KNOWN	TREM2	0	0	0	0
ENSG00000096060	1922.5	0.131877	1.09572	0.215071	0.613181	0.539757	0.821502	protein_coding	KNOWN	FKBP5	18.34	15.39	16.88	18.77
ENSG00000096063	4750.28	-0.0365984	0.974951	0.177207	-0.206529	0.836378	0.951346	protein_coding	KNOWN	SRPK1	60.47	41.99	38.04	54.85
ENSG00000096070	1682.13	-0.553656	0.681291	0.206018	-2.68741	0.00720088	0.0707872	protein_coding	KNOWN	BRPF3	19.27	12.93	10.19	13.62
ENSG00000096080	1955.2	0.0137882	1.0096	0.248573	0.0554694	0.955765	0.988137	protein_coding	KNOWN	MRPS18A	81.84	68.23	62.68	84.75
ENSG00000096092	723.939	-0.330668	0.795168	0.385974	-0.856711	0.391605	0.722241	protein_coding	KNOWN	TMEM14A	24.38	41.99	34.45	16.52
ENSG00000096093	34.803	0.537687	1.45164	0.656318	0.819247	0.412645	0.737227	protein_coding	KNOWN	EFHC1	0.38	0.47	0.66	0.46
ENSG00000096384	176947	0.069632	1.04945	0.180175	0.386469	0.699149	0.899251	protein_coding	KNOWN	HSP90AB1	2380.52	2406.49	2296.51	2546.54
ENSG00000096401	3179.44	-0.0503441	0.965706	0.190093	-0.264839	0.791134	0.933516	protein_coding	KNOWN	CDC5L	17.91	16.31	15.78	16.13
ENSG00000096433	6836.46	-0.0536059	0.963525	0.197798	-0.271014	0.78638	0.932301	protein_coding	KNOWN	ITPR3	22.23	26.31	24.74	20.43
ENSG00000096654	515.478	0.024788	1.01733	0.24091	0.102893	0.918048	0.977315	protein_coding	KNOWN	ZNF184	6.38	5.59	5.61	6.13
ENSG00000096696	12124.7	-0.125859	0.916458	0.171038	-0.735856	0.461818	0.771861	protein_coding	KNOWN	DSP	45.47	47.92	42.74	40.7
ENSG00000096717	1327.93	0.131375	1.09534	0.20084	0.654129	0.513029	0.804605	protein_coding	KNOWN	SIRT1	11.21	11.65	13.49	11.98
ENSG00000096746	6073.29	0.124243	1.08994	0.24944	0.498086	0.618423	0.863331	protein_coding	KNOWN	HNRNPH3	296.16	151.12	168.95	332.29
ENSG00000096872	417.781	-0.197879	0.871832	0.28418	-0.696314	0.486232	0.787195	protein_coding	KNOWN	IFT74	8.42	8.68	5.62	7.07
ENSG00000096968	292.098	0.34573	1.27079	0.266968	1.29502	0.195312	0.524687	protein_coding	KNOWN	JAK2	1.74	2.82	2.18	2.2
ENSG00000096996	0	NA	#VALUE!	NA	NA	NA	NA	protein_coding	KNOWN	IL12RB1	0	0	0	0
ENSG00000097007	2136.52	-0.570095	0.673572	0.185816	-3.06806	0.00215454	0.0290891	protein_coding	KNOWN	ABL1	18.55	21.04	13.27	12.36
ENSG00000097021	5897.99	0.316253	1.24509	0.181899	1.73862	0.0821018	0.333829	protein_coding	KNOWN	ACOT7	136.09	152.72	173.51	173.72
ENSG00000097033	2455.38	-0.00724276	0.994992	0.184281	-0.0393029	0.968649	0.991627	protein_coding	KNOWN	SH3GLB1	35	34.18	36.09	34.69
ENSG00000097046	642.482	0.520795	1.43475	0.243275	2.14076	0.0322931	0.192641	protein_coding	KNOWN	CDC7	7.49	6.18	8.68	9.39
ENSG00000097096	132.916	0.813618	1.75761	0.436405	1.86436	0.0622708	0.285423	protein_coding	KNOWN	SYDE2	0.58	0.7	1.77	0.88
ENSG00000099139	291.57	-0.119712	0.920371	0.268523	-0.445818	0.655728	0.878793	protein_coding	KNOWN	PCSK5	2.1	1.77	1.53	1.57
ENSG00000099194	78507.2	-0.00585035	0.995953	0.181086	-0.032307	0.974227	0.993607	protein_coding	KNOWN	SCD	487.91	520.96	526.53	443.2
ENSG00000099203	740.3	0.44464	1.36097	0.218684	2.03326	0.0420266	0.226323	protein_coding	KNOWN	TMED1	17.51	19.77	25.32	24.53
ENSG00000099204	6920.2	-0.305819	0.808983	0.242235	-1.26249	0.206774	0.539811	protein_coding	KNOWN	ABLIM1	101.3	57.36	47.96	52
ENSG00000099219	2798.55	0.34126	1.26686	0.245525	1.38992	0.164553	0.484319	protein_coding	KNOWN	ERMP1	14.55	18.44	23.99	16.45
ENSG00000099246	2514.03	-0.0523625	0.964356	0.188972	-0.277091	0.78171	0.930452	protein_coding	KNOWN	RAB18	77.57	72.74	67.65	66.12
ENSG00000099250	152.647	-0.502177	0.70604	0.331141	-1.51651	0.129392	0.428329	protein_coding	KNOWN	NRP1	2.02	1.39	1.93	1.37
ENSG00000099251	50.1846	0.785731	1.72397	0.544089	1.44412	0.148704	0.462555	pseudogene	KNOWN	HSD17B7P2	0.98	1.04	2.04	1.42
ENSG00000099282	649.73	-0.0270796	0.981405	0.230321	-0.117573	0.906406	0.973921	protein_coding	KNOWN	TSPAN15	14.94	16.32	14.4	13.16
ENSG00000099284	1870.55	0.0473898	1.03339	0.254571	0.186155	0.852323	0.956787	protein_coding	KNOWN	H2AFY2	38.11	30.36	29.06	39.32
ENSG00000099290	729.899	0.206075	1.15355	0.225504	0.913841	0.360801	0.697905	protein_coding	KNOWN	FAM21A	7.35	7.88	7.89	8.95
ENSG00000099308	770.401	0.302649	1.23341	0.210434	1.43821	0.150373	0.463974	protein_coding	KNOWN	MAST3	3.9	4.1	4.83	4.68
ENSG00000099326	162.71	0.0224619	1.01569	0.343776	0.0653388	0.947904	0.986077	protein_coding	KNOWN	MZF1	1.82	2.56	2.22	2.36
ENSG00000099330	580.783	0.794184	1.7341	0.2524	3.14653	0.00165218	0.0241386	protein_coding	KNOWN	OCEL1	18.65	19.11	28.99	33.33
ENSG00000099331	2674.31	-0.0336897	0.976919	0.188886	-0.17836	0.85844	0.958719	protein_coding	KNOWN	MYO9B	16.21	19.08	17.28	19.51
ENSG00000099337	302.297	0.111155	1.08009	0.284795	0.390298	0.696316	0.898614	protein_coding	KNOWN	KCNK6	3.78	4.14	3.73	5.13
ENSG00000099338	12.5667	-1.1159	0.461404	1.03322	-1.08002	0.280134	NA	protein_coding	KNOWN	CATSPERG	0.61	0.72	0.15	0.42
ENSG00000099341	6088.81	0.173316	1.12765	0.264534	0.655173	0.512356	0.804409	protein_coding	KNOWN	PSMD8	215.22	145.04	163.9	229.17
ENSG00000099364	1766.06	-0.200842	0.870043	0.21816	-0.92062	0.357249	0.694947	protein_coding	KNOWN	FBXL19	24.01	19.85	13.96	21.71
ENSG00000099365	5.83073	0.750184	1.68201	1.52533	0.491818	0.622848	NA	protein_coding	KNOWN	STX1B	0.06	0.18	0.09	0.25
ENSG00000099377	200.944	-0.0718876	0.951392	0.324782	-0.221341	0.824827	0.946309	protein_coding	KNOWN	HSD3B7	3.25	3.84	2.94	3.61
ENSG00000099381	2054.18	-0.0202325	0.986074	0.287152	-0.0704591	0.943828	0.985277	protein_coding	KNOWN	SETD1A	11.68	8.6	8.75	11.71
ENSG00000099385	1375.63	0.586757	1.50187	0.332789	1.76315	0.077875	0.32326	protein_coding	KNOWN	BCL7C	28.51	19.28	24.62	43.62
ENSG00000099399	6728.63	-0.00838907	0.994202	0.173399	-0.04838	0.961413	0.989391	protein_coding	KNOWN	MAGEB2	154.42	158.86	154.29	146.25
ENSG00000099617	456.88	0.299609	1.23081	0.270486	1.10767	0.268005	0.610863	protein_coding	KNOWN	EFNA2	7.64	6.17	7.5	8.9
ENSG00000099622	1974.9	-0.33505	0.792757	0.241483	-1.38747	0.165299	0.485378	protein_coding	KNOWN	CIRBP	80.8	97.4	70.99	68
ENSG00000099624	1932.43	0.16585	1.12183	0.224125	0.739986	0.459308	0.770296	protein_coding	KNOWN	ATP5D	120.32	121.33	108.49	145.79
ENSG00000099625	208.35	-0.0713389	0.951754	0.322446	-0.221243	0.824903	0.946309	protein_coding	KNOWN	C19orf26	4.23	3.25	3.07	4.85
ENSG00000099783	7840.79	-0.199342	0.870948	0.177844	-1.12088	0.26234	0.605574	protein_coding	KNOWN	HNRNPM	286.39	171.84	158.69	237.09
ENSG00000099785	701.221	-0.588635	0.664972	0.230117	-2.55799	0.010528	0.0914946	protein_coding	KNOWN	43161	21.87	24.38	13.77	15.39
ENSG00000099795	1855.84	0.0939267	1.06727	0.252658	0.371754	0.710076	0.904238	protein_coding	KNOWN	NDUFB7	186.94	158.48	144.84	209.89
ENSG00000099797	6529.46	0.48758	1.40209	0.253504	1.92336	0.0544347	0.26434	protein_coding	KNOWN	TECR	205.88	165.97	207.83	295.21
ENSG00000099800	1412.41	0.299476	1.2307	0.205979	1.45391	0.14597	0.457655	protein_coding	KNOWN	TIMM13	40.07	52.14	56.29	61.72
ENSG00000099804	2645.27	-0.0851938	0.942658	0.196493	-0.433573	0.664599	0.883654	protein_coding	KNOWN	CDC34	70.76	71.75	62.98	68.34
ENSG00000099810	6864.24	0.287715	1.22071	0.193034	1.49049	0.136095	0.441238	protein_coding	KNOWN	MTAP	78.38	87.13	101.79	82.3
ENSG00000099812	2007.96	0.274101	1.20924	0.200201	1.36913	0.170958	0.494145	protein_coding	KNOWN	MISP	21.61	23.13	24.42	27.7
ENSG00000099814	2345.36	-0.371862	0.772784	0.207444	-1.79259	0.0730382	0.312708	protein_coding	KNOWN	CEP170B	13.61	14.11	9.64	12.12
ENSG00000099817	4204.73	-0.0755426	0.948985	0.208122	-0.362973	0.716625	0.906442	protein_coding	KNOWN	POLR2E	136.53	110.9	97.6	118.24
ENSG00000099821	2642.2	0.260694	1.19806	0.197662	1.31889	0.187206	0.516749	protein_coding	KNOWN	POLRMT	31.24	38.37	46.36	40.62
ENSG00000099822	216.109	0.492127	1.40652	0.316909	1.5529	0.120448	0.411345	protein_coding	KNOWN	HCN2	1.58	2.11	2.37	2.62
ENSG00000099834	5.46501	1.09072	2.1298	1.61345	0.676014	0.499031	NA	protein_coding	KNOWN	CDHR5	0.01	0.06	0.06	0.08
ENSG00000099840	4.54137	1.26993	2.4115	1.70652	0.744163	0.456778	NA	protein_coding	KNOWN	IZUMO4	0.23	0.12	0.6	0.19
ENSG00000099849	407.755	-0.182853	0.880959	0.24714	-0.739875	0.459376	0.770296	protein_coding	KNOWN	RASSF7	16.05	10.2	7.88	11.39
ENSG00000099860	976.572	0.592169	1.50751	0.26489	2.23553	0.0253829	0.165679	protein_coding	KNOWN	GADD45B	24.93	18.61	28.49	35.45
ENSG00000099864	1884.57	0.19087	1.14145	0.221611	0.861284	0.389082	0.721072	protein_coding	KNOWN	PALM	26.98	23.66	23.06	32.85
ENSG00000099866	2.22132	0.453532	1.36939	2.56463	0.176841	0.859633	NA	protein_coding	KNOWN	MADCAM1	0.04	0.05	0	0.1
ENSG00000099869	10.8111	-0.353204	0.782844	1.06675	-0.331102	0.740568	NA	antisense	KNOWN	IGF2-AS	0.21	0.22	0.14	0.2
ENSG00000099875	8652.51	-0.281499	0.822736	0.188952	-1.48979	0.13628	0.441524	protein_coding	KNOWN	MKNK2	219.98	211.86	163.62	187.5
ENSG00000099889	492.794	-0.67188	0.627688	0.266102	-2.52489	0.0115733	0.0975755	protein_coding	KNOWN	ARVCF	8.48	11.44	6.3	5.51
ENSG00000099899	729.64	-0.624783	0.648517	0.241501	-2.58708	0.00967931	0.086574	protein_coding	KNOWN	TRMT2A	24.66	18.01	9.75	17.5
ENSG00000099901	4798.42	0.18205	1.13449	0.267772	0.679868	0.496588	0.795847	protein_coding	KNOWN	RANBP1	234.36	180.99	182.37	265.58
ENSG00000099904	1254.84	-0.236769	0.848644	0.203241	-1.16496	0.244033	0.586361	protein_coding	KNOWN	ZDHHC8	25.37	24.48	16.07	15.77
ENSG00000099910	302.393	-0.154256	0.898595	0.284958	-0.54133	0.58828	0.847766	protein_coding	KNOWN	KLHL22	5.3	6.11	4.29	3.98
ENSG00000099917	2134.25	-0.279529	0.82386	0.219405	-1.27403	0.202653	0.534852	protein_coding	KNOWN	MED15	28.52	27.12	19.24	23.62
ENSG00000099940	1450.93	-0.239321	0.847144	0.273974	-0.873517	0.382381	0.715286	protein_coding	KNOWN	SNAP29	55.9	24.34	21.28	48.68
ENSG00000099942	5018.07	-0.244446	0.84414	0.234148	-1.04398	0.296493	0.642052	protein_coding	KNOWN	CRKL	33.7	39.39	33.14	27.03
ENSG00000099949	963.253	-0.723565	0.605599	0.219816	-3.29169	0.000995888	0.0167299	protein_coding	KNOWN	LZTR1	16.88	10.44	7.37	10.88
ENSG00000099953	478.71	-0.381565	0.767605	0.279311	-1.36609	0.171909	0.495294	protein_coding	KNOWN	MMP11	7.39	9.91	8.06	5.55
ENSG00000099954	435.953	-0.76132	0.589956	0.276473	-2.75368	0.00589285	0.0612927	protein_coding	KNOWN	CECR2	4.72	4.74	3.06	3.31
ENSG00000099956	3928.34	0.420915	1.33878	0.227662	1.84886	0.0644779	0.291567	protein_coding	KNOWN	SMARCB1	82.84	71.38	84.75	111.62
ENSG00000099968	2501.49	-0.535214	0.690056	0.198916	-2.69065	0.0071313	0.070354	protein_coding	KNOWN	BCL2L13	37.06	38.54	27.58	22.03
ENSG00000099974	50.8065	-0.306314	0.808705	0.533634	-0.574016	0.565957	0.836136	protein_coding	KNOWN	DDTL	1.5	1.23	0.96	1.17
ENSG00000099977	1157.25	-0.0788985	0.94678	0.226598	-0.348187	0.7277	0.910223	protein_coding	KNOWN	DDT	72.28	90.07	78.95	66.93
ENSG00000099984	467.384	-0.338826	0.790684	0.266101	-1.2733	0.202913	0.534896	protein_coding	KNOWN	GSTT2	21.3	17.84	13.62	16.53
ENSG00000099991	3296.71	-0.372796	0.772284	0.181367	-2.05547	0.0398332	0.219266	protein_coding	KNOWN	CABIN1	29.25	25.48	18.17	23.33
ENSG00000099992	697.537	0.256401	1.19449	0.232591	1.10237	0.270301	0.613359	protein_coding	KNOWN	TBC1D10A	12	11.13	11.79	13.73
ENSG00000099994	528.941	0.318686	1.24719	0.309081	1.03108	0.302505	0.646444	protein_coding	KNOWN	SUSD2	5.76	3.87	5	6.57
ENSG00000099995	7424.51	-0.345537	0.787015	0.21842	-1.58199	0.113653	0.398044	protein_coding	KNOWN	SF3A1	99	80.74	57.53	77.57
ENSG00000099999	278.589	0.0497114	1.03506	0.325188	0.15287	0.878501	0.964672	protein_coding	KNOWN	RNF215	4.99	6.62	7.17	5
ENSG00000100003	556.164	-0.849045	0.555152	0.229884	-3.69336	0.00022131	0.0051822	protein_coding	KNOWN	SEC14L2	15.7	14.74	10.76	10.66
ENSG00000100014	1334.17	-0.257609	0.836473	0.193971	-1.32808	0.184152	0.512888	protein_coding	KNOWN	SPECC1L	7.64	7.92	6.26	5.96
ENSG00000100023	1272.71	-0.310122	0.806573	0.251746	-1.23189	0.217992	0.554815	protein_coding	KNOWN	PPIL2	19.42	15.97	12.27	15.82
ENSG00000100027	154.172	0.672408	1.59373	0.340998	1.97188	0.0486235	0.247089	protein_coding	KNOWN	YPEL1	1.23	1.47	2	1.42
ENSG00000100028	4887.6	-0.0318815	0.978144	0.28602	-0.111466	0.911247	0.975199	protein_coding	KNOWN	SNRPD3	265.05	182.45	174.28	244.16
ENSG00000100029	5862.47	-0.0447172	0.96948	0.229979	-0.19444	0.845831	0.954953	protein_coding	KNOWN	PES1	115	94.76	82.02	113.43
ENSG00000100030	5268.66	-0.267203	0.830929	0.258717	-1.0328	0.301698	0.64617	protein_coding	KNOWN	MAPK1	53.66	66.79	57.8	32.04
ENSG00000100031	179.457	-1.06043	0.47949	0.317672	-3.33812	0.000843483	0.0147631	protein_coding	KNOWN	GGT1	5.23	5.98	3.15	2.4
ENSG00000100033	47.8428	-0.731853	0.60213	0.56798	-1.28852	0.197565	0.52684	protein_coding	KNOWN	PRODH	1.3	0.87	0.61	0.59
ENSG00000100034	1574.23	-0.0895521	0.939814	0.193028	-0.463933	0.642695	0.872105	protein_coding	KNOWN	PPM1F	16.06	14.82	13.93	15.12
ENSG00000100036	230.002	0.0495653	1.03495	0.310738	0.159508	0.873269	0.962339	protein_coding	KNOWN	SLC35E4	2.8	3.38	2.78	3.63
ENSG00000100038	735.218	-0.613041	0.653817	0.219045	-2.7987	0.00513087	0.0555455	protein_coding	KNOWN	TOP3B	16.07	15.13	9.95	9.84
ENSG00000100053	1.04334	3.60097	12.1339	3.89788	0.923829	0.355576	NA	protein_coding	KNOWN	CRYBB3	0	0	0.05	0.14
ENSG00000100055	145.75	0.874261	1.83307	0.347211	2.51795	0.011804	0.0989066	protein_coding	KNOWN	CYTH4	1.53	2.18	2.4	2.11
ENSG00000100056	788.85	-0.0911971	0.938744	0.250902	-0.363476	0.716249	0.906436	protein_coding	KNOWN	DGCR14	12.81	11.68	9.84	14.69
ENSG00000100058	233.647	0.122581	1.08868	0.339914	0.360623	0.718381	0.906693	pseudogene	KNOWN	CRYBB2P1	8.34	5.21	6.87	8.16
ENSG00000100060	21.316	1.24359	2.36787	0.838877	1.48245	0.138222	0.444629	protein_coding	KNOWN	MFNG	0.29	0.15	0.41	0.59
ENSG00000100065	1004.98	0.158608	1.11621	0.219476	0.722668	0.469884	0.776717	protein_coding	KNOWN	CARD10	11.52	11.57	10.48	13.17
ENSG00000100068	31.089	0.820574	1.76611	0.663607	1.23654	0.21626	0.552551	protein_coding	KNOWN	LRP5L	0.54	0.43	0.72	0.8
ENSG00000100075	2483.74	0.395133	1.31506	0.197667	1.99899	0.0456098	0.238638	protein_coding	KNOWN	SLC25A1	46.09	56.55	65.23	64.05
ENSG00000100077	334.285	0.303362	1.23402	0.266735	1.13731	0.255407	0.597552	protein_coding	KNOWN	ADRBK2	4.79	4.2	5.53	5.41
ENSG00000100083	1516.24	-0.0383045	0.973799	0.210768	-0.181738	0.855788	0.957314	protein_coding	KNOWN	GGA1	25.33	25.1	20.77	28.04
ENSG00000100084	1544.62	-0.378625	0.76917	0.198401	-1.90838	0.0563418	0.269441	protein_coding	KNOWN	HIRA	14.58	15.54	10.58	11.53
ENSG00000100092	2026.23	0.271559	1.20711	0.200772	1.35257	0.176192	0.502074	protein_coding	KNOWN	SH3BP1	21.37	28.45	30.22	27.84
ENSG00000100097	20354.2	0.671413	1.59263	0.231047	2.90596	0.00366132	0.0431229	protein_coding	KNOWN	LGALS1	1177.82	1609.47	2347.36	1927.73
ENSG00000100099	854.127	0.136197	1.099	0.208852	0.652121	0.514323	0.805804	protein_coding	KNOWN	HPS4	7.61	9.65	8.86	9.95
ENSG00000100100	52.1446	-2.48502	0.178622	0.596712	-4.16451	3.12017e-05	0.00103695	protein_coding	KNOWN	PIK3IP1	1.77	1.54	0.14	0.26
ENSG00000100101	26.5594	0.143095	1.10427	0.749529	0.190914	0.848593	0.95565	protein_coding	KNOWN	NOL12	0.08	0.13	0.14	0.08
ENSG00000100104	454.839	-0.520867	0.696953	0.237134	-2.1965	0.0280558	0.176365	protein_coding	KNOWN	SRRD	20.48	18.66	12.94	13.76
ENSG00000100105	1535.76	-0.309766	0.806773	0.191265	-1.61956	0.105326	0.381997	protein_coding	KNOWN	PATZ1	18.8	18.72	14.5	13.53
ENSG00000100106	5180.82	0.144246	1.10515	0.175671	0.821116	0.41158	0.737159	protein_coding	KNOWN	TRIOBP	69.83	75.51	89.71	80.13
ENSG00000100109	1985.09	-0.0650683	0.9559	0.200562	-0.32443	0.745612	0.917595	protein_coding	KNOWN	TFIP11	27.47	29.08	23.84	28.74
ENSG00000100116	1783.19	0.777787	1.7145	0.209719	3.70871	0.000208317	0.00494511	protein_coding	KNOWN	GCAT	36.21	38.19	55.41	69.18
ENSG00000100124	652.511	0.222498	1.16675	0.239934	0.927327	0.353757	0.691612	protein_coding	KNOWN	ANKRD54	10.66	10.47	10.54	12.37
ENSG00000100129	18399.7	0.305535	1.23588	0.184072	1.65987	0.0969406	0.366094	protein_coding	KNOWN	EIF3L	432.58	567.48	674.78	551.88
ENSG00000100138	5663.67	-0.0668151	0.954743	0.183889	-0.363344	0.716348	0.906436	protein_coding	KNOWN	NHP2L1	150.12	174.9	178.6	145.99
ENSG00000100139	1039.83	-0.0140417	0.990314	0.203596	-0.0689685	0.945015	0.985346	protein_coding	KNOWN	MICALL1	7.96	10.6	10.55	8.59
ENSG00000100142	1704.16	-0.0990161	0.93367	0.201891	-0.490444	0.62382	0.865467	protein_coding	KNOWN	POLR2F	134.58	130.86	116.38	127.85
ENSG00000100147	129.976	-0.600679	0.659444	0.364921	-1.64605	0.0997537	0.371337	protein_coding	KNOWN	CCDC134	4.83	4.73	3.45	2.65
ENSG00000100150	607.983	-0.112531	0.924964	0.228932	-0.491546	0.623041	0.865467	protein_coding	KNOWN	DEPDC5	6.88	8.66	7	8.89
ENSG00000100151	688.381	-0.348342	0.785486	0.277959	-1.25321	0.210128	0.544177	protein_coding	KNOWN	PICK1	20.16	17.05	12.22	15.69
ENSG00000100156	0.909379	-1.23672	0.424336	4.21435	-0.293455	0.769175	NA	protein_coding	KNOWN	SLC16A8	0.17	0	0.07	0
ENSG00000100162	460.332	0.0518462	1.03659	0.248513	0.208626	0.83474	0.950537	protein_coding	KNOWN	CENPM	17.57	21.72	19.75	19.4
ENSG00000100167	1264.18	-0.00586986	0.99594	0.267604	-0.0219349	0.9825	0.995968	protein_coding	KNOWN	43346	14.16	9.79	9.75	13.39
ENSG00000100170	180.101	0.193086	1.14321	0.3122	0.618468	0.536267	0.819746	protein_coding	KNOWN	SLC5A1	1.37	1.49	1.99	1.69
ENSG00000100196	1888.3	0.379022	1.30046	0.198934	1.90527	0.0567456	0.269874	protein_coding	KNOWN	KDELR3	37.47	34.18	47.72	42.93
ENSG00000100197	4.11499	0.87788	1.83767	1.6921	0.51881	0.603893	NA	protein_coding	KNOWN	CYP2D6	0.03	0.07	0.09	0.17
ENSG00000100201	6918.39	0.111901	1.08065	0.217926	0.513482	0.607614	0.857999	protein_coding	KNOWN	DDX17	49.35	67.25	66.52	52.62
ENSG00000100206	2.67926	0.498324	1.41257	2.06798	0.240972	0.809577	NA	protein_coding	KNOWN	DMC1	0.09	0.09	0.08	0.17
ENSG00000100207	3036.45	0.594804	1.51027	0.19893	2.99002	0.0027896	0.0351041	protein_coding	KNOWN	TCF20	13.19	13.28	18.42	18.94
ENSG00000100209	238.973	0.208616	1.15558	0.288834	0.72227	0.470128	0.776717	protein_coding	KNOWN	HSCB	8.92	11.57	11.71	11.97
ENSG00000100211	819.46	-0.302434	0.810883	0.295145	-1.0247	0.305507	0.649137	protein_coding	KNOWN	CBY1	41.69	34.61	21.58	34.68
ENSG00000100216	4408.62	0.0822579	1.05867	0.194688	0.422512	0.672651	0.887007	protein_coding	KNOWN	TOMM22	119.99	108.93	110.14	122.2
ENSG00000100218	9.84743	1.04917	2.06934	1.12537	0.932289	0.351187	NA	protein_coding	KNOWN	RTDR1	0.23	0.83	0.97	0.51
ENSG00000100219	1803.69	-0.158278	0.896094	0.210699	-0.751204	0.45253	0.766806	protein_coding	KNOWN	XBP1	38.51	42.99	38.38	33.51
ENSG00000100220	2196.64	-0.183889	0.880326	0.212925	-0.863633	0.387789	0.720222	protein_coding	KNOWN	RTCB	45.97	47.31	38.05	43.88
ENSG00000100221	2791.57	0.234876	1.17681	0.228929	1.02598	0.304902	0.648551	protein_coding	KNOWN	JOSD1	22.53	27.46	33.67	23.86
ENSG00000100225	3423.02	-0.113297	0.924473	0.179563	-0.630958	0.528068	0.814256	protein_coding	KNOWN	FBXO7	67.09	65.88	58.44	59.93
ENSG00000100226	1567.21	0.170271	1.12527	0.196905	0.864738	0.387182	0.719485	protein_coding	KNOWN	GTPBP1	12.9	13.09	14.14	15.72
ENSG00000100227	3529.54	0.130626	1.09477	0.178547	0.731602	0.464412	0.773664	protein_coding	KNOWN	POLDIP3	39.64	35.01	38.17	39.29
ENSG00000100228	187.623	-1.14715	0.451517	0.332609	-3.44894	0.0005628	0.0108561	protein_coding	KNOWN	RAB36	2.35	2.47	1.3	0.85
ENSG00000100234	30.8988	0.76428	1.69852	0.686154	1.11386	0.265339	0.607936	protein_coding	KNOWN	TIMP3	0.12	0.22	0.31	0.25
ENSG00000100239	1742.5	0.00933155	1.00649	0.21927	0.0425574	0.966054	0.99084	protein_coding	KNOWN	PPP6R2	19.39	22.86	18.38	22.95
ENSG00000100241	2211.42	-0.0525706	0.964217	0.246446	-0.213315	0.831081	0.948585	protein_coding	KNOWN	SBF1	17.14	23.58	19.45	18.93
ENSG00000100242	1946.05	0.724448	1.65227	0.241848	2.99547	0.00274025	0.034666	protein_coding	KNOWN	SUN2	14.61	17.89	27.59	19.85
ENSG00000100243	7271.46	0.0206451	1.01441	0.291135	0.0709126	0.943467	0.985277	protein_coding	KNOWN	CYB5R3	165.39	102.1	107.8	154.8
ENSG00000100246	622.016	-0.23687	0.848585	0.229884	-1.03039	0.302829	0.646936	protein_coding	KNOWN	DNAL4	17.52	16.77	14.99	12.71
ENSG00000100253	1.24762	-3.66897	0.0786193	3.66916	-0.999949	0.317335	NA	protein_coding	KNOWN	MIOX	0.04	0.17	0	0
ENSG00000100258	874.926	-0.235219	0.849556	0.211841	-1.11036	0.266845	0.609131	protein_coding	KNOWN	LMF2	13.28	13.73	11.43	11.56
ENSG00000100263	205.723	-0.545257	0.685269	0.303558	-1.79622	0.0724595	0.311126	protein_coding	KNOWN	RHBDD3	6.61	7.17	4.9	5.2
ENSG00000100266	2846.53	0.00373916	1.0026	0.180282	0.0207406	0.983453	0.996384	protein_coding	KNOWN	PACSIN2	35.72	31.6	31.08	35.47
ENSG00000100271	137.88	-0.0810958	0.945339	0.434229	-0.186758	0.85185	0.956691	protein_coding	KNOWN	TTLL1	3.85	2.53	2.22	3.61
ENSG00000100276	10.5924	1.96062	3.89228	1.17995	1.66162	0.0965898	NA	protein_coding	KNOWN	RASL10A	0.06	0.15	0.27	0.49
ENSG00000100280	3968.41	-0.209441	0.864872	0.185723	-1.12771	0.259444	0.602398	protein_coding	KNOWN	AP1B1	38.76	36	28.41	34.24
ENSG00000100281	1659.5	0.500393	1.4146	0.210916	2.37247	0.0176695	0.130041	protein_coding	KNOWN	HMGXB4	16.64	13.24	19.84	18.38
ENSG00000100284	574.416	-0.244909	0.843869	0.24602	-0.995484	0.319501	0.66274	protein_coding	KNOWN	TOM1	16.17	10.49	7.08	13.64
ENSG00000100288	110.831	0.0972178	1.06971	0.390313	0.249077	0.803301	0.938875	protein_coding	KNOWN	CHKB	5.61	3.35	4.26	4.74
ENSG00000100290	433.616	-0.347967	0.785691	0.381259	-0.912678	0.361412	0.698232	protein_coding	KNOWN	BIK	16.26	25.73	21.15	10.71
ENSG00000100292	1051.64	0.788936	1.7278	0.214237	3.68253	0.000230929	0.00538001	protein_coding	KNOWN	HMOX1	14.51	17.08	25.15	27.36
ENSG00000100294	624.269	-0.60534	0.657316	0.230818	-2.62259	0.00872635	0.0810464	protein_coding	KNOWN	MCAT	21.73	21.72	13.1	15.21
ENSG00000100296	2414.79	0.206246	1.15368	0.20404	1.01081	0.312108	0.655787	protein_coding	KNOWN	THOC5	36.87	35.88	35.56	47.26
ENSG00000100297	4237.45	0.15314	1.11199	0.216414	0.707626	0.479178	0.782016	protein_coding	KNOWN	MCM5	57.2	51.68	52.01	64.8
ENSG00000100298	43.6764	-0.804387	0.572606	0.559631	-1.43735	0.150618	0.464275	protein_coding	KNOWN	APOBEC3H	2.55	2.21	1.16	1.2
ENSG00000100299	157.778	-0.254938	0.838023	0.338478	-0.753189	0.451336	0.766039	protein_coding	KNOWN	ARSA	3.21	3.42	2.49	3.16
ENSG00000100300	1876.22	0.301993	1.23285	0.2315	1.30451	0.19206	0.522165	protein_coding	KNOWN	TSPO	83.03	106.16	123.71	106.61
ENSG00000100302	103.053	1.04895	2.06903	0.41014	2.55755	0.0105413	0.0915524	protein_coding	KNOWN	RASD2	0.77	0.6	1.26	1.48
ENSG00000100304	5182.6	-0.383981	0.76632	0.191997	-1.99994	0.0455072	0.238473	protein_coding	KNOWN	TTLL12	74.1	59.16	45.59	55.59
ENSG00000100307	650.822	-0.490584	0.711737	0.221867	-2.21116	0.0270245	0.172238	protein_coding	KNOWN	CBX7	6.98	7.21	5.95	6.68
ENSG00000100311	1105.27	0.0586741	1.04151	0.224952	0.260829	0.794224	0.934876	protein_coding	KNOWN	PDGFB	11.03	11.69	12.81	10.04
ENSG00000100312	20.7617	0.108949	1.07844	0.811355	0.13428	0.893181	NA	protein_coding	KNOWN	ACR	0.53	0.52	0.42	0.7
ENSG00000100316	73797.7	0.0941909	1.06747	0.247705	0.380254	0.703757	0.901981	protein_coding	KNOWN	RPL3	1637.32	2368.34	2342.52	1806.34
ENSG00000100319	421.345	0.147829	1.1079	0.298248	0.495659	0.620135	0.863833	protein_coding	KNOWN	ZMAT5	19.42	15.22	15.6	21.66
ENSG00000100320	5692.26	-0.271895	0.828231	0.188996	-1.43863	0.150256	0.463974	protein_coding	KNOWN	RBFOX2	52.71	48.43	45.3	39.84
ENSG00000100321	472.414	0.465743	1.38103	0.247252	1.88368	0.0596088	0.277745	protein_coding	KNOWN	SYNGR1	5.88	6.51	9.43	8.4
ENSG00000100324	1090.36	0.0574327	1.04061	0.254552	0.225623	0.821495	0.945478	protein_coding	KNOWN	TAB1	12.76	10.6	10.18	14.04
ENSG00000100325	1980.34	-0.13115	0.913104	0.219544	-0.597374	0.550258	0.826708	protein_coding	KNOWN	ASCC2	39.11	25.71	23.29	36.82
ENSG00000100330	1651.82	-0.247149	0.84256	0.240108	-1.02933	0.303327	0.647545	protein_coding	KNOWN	MTMR3	8.53	10.34	8.4	6.49
ENSG00000100335	2881.15	-0.323642	0.79905	0.241872	-1.33807	0.180872	0.508892	protein_coding	KNOWN	MIEF1	21.24	26.49	20.17	14.77
ENSG00000100341	57.2602	0.640135	1.55848	0.502407	1.27414	0.202614	0.534852	protein_coding	KNOWN	PNPLA5	0.72	0.7	1	1.15
ENSG00000100342	17.8813	-2.08627	0.235489	1.0032	-2.07961	0.0375613	NA	protein_coding	KNOWN	APOL1	0.27	0.48	0.04	0.2
ENSG00000100344	142.565	-0.313253	0.804825	0.38197	-0.8201	0.412159	0.737159	protein_coding	KNOWN	PNPLA3	3.56	2.28	2.26	2.52
ENSG00000100345	23840.5	0.0204254	1.01426	0.193975	0.105299	0.916139	0.977315	protein_coding	KNOWN	MYH9	112.08	114.72	98.46	113.79
ENSG00000100346	6.7132	1.06115	2.08659	1.37339	0.772645	0.439732	NA	protein_coding	KNOWN	CACNA1I	0.01	0.03	0.04	1.67
ENSG00000100347	1540.94	-0.392509	0.761804	0.215453	-1.82179	0.068487	0.299864	protein_coding	KNOWN	SAMM50	33.84	41.68	29.8	25.57
ENSG00000100348	3007.11	-0.0127453	0.991205	0.274882	-0.0463664	0.963018	0.989856	protein_coding	KNOWN	TXN2	98.8	87.51	77.45	100.02
ENSG00000100350	1008.71	-0.514739	0.699919	0.231341	-2.22502	0.0260798	0.1687	protein_coding	KNOWN	FOXRED2	9.56	9.41	5.56	6.34
ENSG00000100351	10.2156	0.233177	1.17542	1.11251	0.209596	0.833983	NA	protein_coding	KNOWN	GRAP2	0.22	0.52	0.14	0.23
ENSG00000100353	14093.9	0.0430647	1.0303	0.212867	0.202308	0.839676	0.95244	protein_coding	KNOWN	EIF3D	358.88	291.93	305.95	335.36
ENSG00000100354	2785.38	-0.0464013	0.968349	0.192854	-0.240603	0.809863	0.940462	protein_coding	KNOWN	TNRC6B	7.91	7.51	6.81	7.54
ENSG00000100359	986.044	-0.103206	0.930962	0.229097	-0.450492	0.652355	0.876673	protein_coding	KNOWN	SGSM3	17.18	22	17.13	17.11
ENSG00000100360	285.235	-0.0542916	0.963067	0.272432	-0.199285	0.84204	0.953625	protein_coding	KNOWN	IFT27	12.26	12.23	10.69	12.25
ENSG00000100364	4129.15	-0.282848	0.821967	0.179827	-1.5729	0.115743	0.402026	protein_coding	KNOWN	KIAA0930	49.52	48.88	41.1	42.75
ENSG00000100365	4.41342	-0.469542	0.722194	1.60052	-0.293369	0.76924	NA	protein_coding	KNOWN	NCF4	0.17	0.14	0.12	0.13
ENSG00000100372	513.475	-0.00783848	0.994582	0.345289	-0.0227012	0.981889	0.995968	protein_coding	KNOWN	SLC25A17	9.3	12.04	12.83	7.48
ENSG00000100376	390.815	0.304142	1.23468	0.273204	1.11324	0.265605	0.608106	protein_coding	KNOWN	FAM118A	7.36	5.14	6.42	8.52
ENSG00000100379	454.49	-0.201026	0.869932	0.243059	-0.827065	0.4082	0.734207	protein_coding	KNOWN	KCTD17	16.14	15.78	10.72	12.88
ENSG00000100380	16348.6	0.677758	1.59965	0.227868	2.97435	0.00293613	0.0364492	protein_coding	KNOWN	ST13	297.31	221.08	312.28	496.46
ENSG00000100387	822.831	0.912869	1.88279	0.323758	2.8196	0.00480832	0.0529683	protein_coding	KNOWN	RBX1	14.05	24.79	43.28	27.77
ENSG00000100393	2608.44	-0.173327	0.886795	0.263179	-0.658588	0.51016	0.803611	protein_coding	KNOWN	EP300	11	8.38	6.99	9.59
ENSG00000100395	1540.13	-0.185675	0.879238	0.195399	-0.950236	0.341993	0.682694	protein_coding	KNOWN	L3MBTL2	17.62	19.1	14.6	15.75
ENSG00000100399	1.26071	-0.447224	0.733453	2.82289	-0.158428	0.87412	NA	protein_coding	KNOWN	CHADL	0.01	0.03	0.02	0.02
ENSG00000100401	5984.74	0.182854	1.13513	0.204863	0.892567	0.372089	0.707241	protein_coding	KNOWN	RANGAP1	56.1	74.37	73.97	68.69
ENSG00000100403	4172.62	-0.560941	0.67786	0.222764	-2.5181	0.0117991	0.0989066	protein_coding	KNOWN	ZC3H7B	28.7	29.12	16.53	21.28
ENSG00000100410	1408.26	-0.0336314	0.976958	0.194387	-0.173012	0.862642	0.960009	protein_coding	KNOWN	PHF5A	54.92	56.75	51.36	49.22
ENSG00000100412	6210.95	0.0295572	1.0207	0.175061	0.16884	0.865923	0.960341	protein_coding	KNOWN	ACO2	82.58	87.54	86.25	82.86
ENSG00000100413	2092.31	-0.307001	0.80832	0.190436	-1.61209	0.106942	0.385238	protein_coding	KNOWN	POLR3H	27.63	29.64	28.87	27.19
ENSG00000100416	899.96	0.153581	1.11233	0.217086	0.707466	0.479277	0.78206	protein_coding	KNOWN	TRMU	18.55	20.06	20.35	22.15
ENSG00000100417	611.99	0.247223	1.18692	0.238134	1.03817	0.299192	0.645262	protein_coding	KNOWN	PMM1	15.06	18.59	19.89	18.91
ENSG00000100418	1577.93	-0.808046	0.571155	0.224926	-3.59249	0.00032753	0.00715893	protein_coding	KNOWN	DESI1	28.02	18.14	9.57	19.7
ENSG00000100422	2821.36	-0.130557	0.913479	0.203664	-0.641044	0.521494	0.811054	protein_coding	KNOWN	CERK	21.78	24.63	22.9	18.47
ENSG00000100425	1274.86	-0.0330261	0.977368	0.216483	-0.152557	0.878747	0.964713	protein_coding	KNOWN	BRD1	11.33	9.73	9.43	11.64
ENSG00000100426	2044.04	-0.027649	0.981018	0.213163	-0.129709	0.896797	0.970771	protein_coding	KNOWN	ZBED4	12.48	14.42	14.27	11.22
ENSG00000100427	1.18449	-0.22819	0.853705	3.76794	-0.0605611	0.951709	NA	protein_coding	KNOWN	MLC1	0.02	0	0.02	0
ENSG00000100429	223.186	0.00655687	1.00456	0.325546	0.0201411	0.983931	0.99643	protein_coding	KNOWN	HDAC10	4.07	6.48	5.81	4.3
ENSG00000100439	537.572	-0.556225	0.68008	0.293299	-1.89644	0.0579013	0.272551	protein_coding	KNOWN	ABHD4	10.5	8.34	5.72	6.96
ENSG00000100441	2219.54	-0.488854	0.712591	0.245595	-1.99049	0.0465368	0.240839	protein_coding	KNOWN	KHNYN	15.03	20.94	13.92	11.23
ENSG00000100442	1809.07	0.0128003	1.00891	0.196819	0.0650356	0.948146	0.986077	protein_coding	KNOWN	FKBP3	50.84	52.65	47.97	52.86
ENSG00000100445	727.598	0.0386704	1.02717	0.221607	0.1745	0.861473	0.959728	protein_coding	KNOWN	SDR39U1	26.1	27.98	23.94	27.16
ENSG00000100461	1617.23	-0.330272	0.795386	0.195553	-1.68892	0.0912352	0.3544	protein_coding	KNOWN	RBM23	45.96	27.24	23.12	29.62
ENSG00000100462	6576.62	-0.185496	0.879347	0.207128	-0.895558	0.370489	0.706064	protein_coding	KNOWN	PRMT5	132.61	136.31	105.72	107.73
ENSG00000100473	101.72	0.338283	1.26425	0.452173	0.748127	0.454384	0.767903	protein_coding	KNOWN	COCH	1.19	2.04	1.84	2.04
ENSG00000100478	53.3801	-0.474474	0.719729	0.517335	-0.91715	0.359064	0.696416	protein_coding	KNOWN	AP4S1	1.51	2.3	1.25	1.16
ENSG00000100479	397.315	0.163924	1.12033	0.26276	0.623853	0.532724	0.817187	protein_coding	KNOWN	POLE2	15.67	11.85	12.59	15.28
ENSG00000100483	184.317	0.342743	1.26817	0.359679	0.952915	0.340633	0.681859	protein_coding	KNOWN	VCPKMT	3.82	4.44	5.56	4.16
ENSG00000100485	709.989	0.459138	1.37472	0.235424	1.95027	0.0511445	0.25401	protein_coding	KNOWN	SOS2	4.32	3.65	5.54	5.22
ENSG00000100490	59.3269	0.541675	1.45566	0.539647	1.00376	0.315495	0.658789	protein_coding	KNOWN	CDKL1	2.77	1.55	2.62	2.43
ENSG00000100503	2243.64	0.169873	1.12496	0.192676	0.881655	0.377963	0.712335	protein_coding	KNOWN	NIN	13.43	12.7	14.07	13.39
ENSG00000100504	9019.16	-0.177905	0.883986	0.181073	-0.982503	0.325852	0.667616	protein_coding	KNOWN	PYGL	142.29	127.47	106.14	122.16
ENSG00000100505	138.193	0.361666	1.28491	0.41938	0.862381	0.388478	0.72056	protein_coding	KNOWN	TRIM9	0.98	0.97	1.53	0.76
ENSG00000100519	1910.95	0.0309396	1.02168	0.206141	0.150089	0.880694	0.965402	protein_coding	KNOWN	PSMC6	88.64	48.3	51.61	82.1
ENSG00000100522	1184.71	0.670492	1.59162	0.221437	3.02791	0.0024625	0.0322533	protein_coding	KNOWN	GNPNAT1	10.92	10.56	15.43	14.11
ENSG00000100523	1208.69	-0.199482	0.870863	0.257212	-0.775557	0.438011	0.757118	protein_coding	KNOWN	DDHD1	7.49	8.61	8.11	5.5
ENSG00000100526	1379.42	1.18247	2.26964	0.300268	3.93803	8.21525e-05	0.00236858	protein_coding	KNOWN	CDKN3	62.85	40.86	89.11	136.33
ENSG00000100528	2821.74	0.24314	1.18357	0.304277	0.799072	0.424249	0.745975	protein_coding	KNOWN	CNIH1	73.36	94.73	118.16	71.49
ENSG00000100532	369.032	0.27954	1.21381	0.31372	0.891049	0.372903	0.707551	protein_coding	KNOWN	CGRRF1	8.43	9.2	12.41	8.92
ENSG00000100554	1607.81	-0.511656	0.701417	0.232073	-2.20472	0.0274738	0.174055	protein_coding	KNOWN	ATP6V1D	45.34	59.81	38.75	34.19
ENSG00000100558	1127.65	1.1648	2.24202	0.236788	4.91917	8.69131e-07	4.87279e-05	protein_coding	KNOWN	PLEK2	20.83	20.55	41.28	45.81
ENSG00000100564	477.399	0.159328	1.11677	0.286212	0.556678	0.577748	0.842074	protein_coding	KNOWN	PIGH	12.09	16.32	17.07	12.31
ENSG00000100567	2996.65	-0.283438	0.82163	0.231392	-1.22492	0.220604	0.558362	protein_coding	KNOWN	PSMA3	146.34	155.2	129.83	107.94
ENSG00000100568	2724.31	-0.140649	0.907111	0.19997	-0.703351	0.481837	0.783852	protein_coding	KNOWN	VTI1B	63.85	54.14	51.81	61.06
ENSG00000100575	572.64	0.409584	1.3283	0.267311	1.53223	0.125465	0.420701	protein_coding	KNOWN	TIMM9	20.47	19.9	33.84	26.46
ENSG00000100577	562.552	-0.921248	0.528052	0.236383	-3.89727	9.72816e-05	0.00271052	protein_coding	KNOWN	GSTZ1	26.04	28.43	14.18	14.3
ENSG00000100578	558.613	-0.00219798	0.998478	0.237171	-0.00926748	0.992606	0.998816	protein_coding	KNOWN	KIAA0586	6.03	7.15	6.73	5.59
ENSG00000100580	1492.9	-0.0974413	0.934689	0.260618	-0.373885	0.70849	0.903763	protein_coding	KNOWN	TMED8	6.09	7.34	7.37	4.78
ENSG00000100583	23.9344	-1.6612	0.316175	0.846511	-1.96241	0.0497144	0.250251	protein_coding	KNOWN	SAMD15	0.49	0.78	0.07	0.23
ENSG00000100591	9164.73	0.0645141	1.04573	0.259367	0.248737	0.803564	0.938875	protein_coding	KNOWN	AHSA1	340.24	252.46	271.1	358.04
ENSG00000100592	667.689	-0.249674	0.841086	0.233764	-1.06806	0.285493	0.629701	protein_coding	KNOWN	DAAM1	8.43	9.38	7.22	6.93
ENSG00000100596	3898.5	-0.88675	0.540831	0.268183	-3.30651	0.000944663	0.016047	protein_coding	KNOWN	SPTLC2	19.53	23.13	13.7	10.33
ENSG00000100599	860.617	-0.880926	0.543019	0.246792	-3.56951	0.000357652	0.00764766	protein_coding	KNOWN	RIN3	11.21	10.89	5.25	6.72
ENSG00000100600	2169.12	-0.187074	0.878385	0.208492	-0.897274	0.369573	0.705	protein_coding	KNOWN	LGMN	52.04	41.37	32.92	46.33
ENSG00000100601	680.757	0.00857068	1.00596	0.217922	0.039329	0.968628	0.991627	protein_coding	KNOWN	ALKBH1	9.26	11.09	10.82	9.55
ENSG00000100603	3284.33	0.251552	1.19049	0.272854	0.921928	0.356566	0.694305	protein_coding	KNOWN	SNW1	66.94	60.27	63.39	76.52
[truncated: 15,644 more rows]
