# Supplementary material for: p53-induced RNA-binding protein ZMAT3 inhibits transcription of a hexokinase to suppress mitochondrial respiration in human cancer cells
Source: eLife. 2026 Mar 17;14:RP107538. doi: 10.7554/eLife.107538 (PMC12995290; doi:10.7554/eLife.107538)
Supplement: Supplementary file 5. [file elife-107538-supp5.xlsx]

## Sheet: Less 10% Crapome ZMAT3 IP inter
Supplementary File 5. Quantitative mass spectrometry was performed from ZMAT3-FLAG-HA IPs from doxycycline inducible ZMAT3-FLAG-HA HCT116 cells in presence and absence of doxycycline treatment. Differentially enriched proteins were identified by using crapome<10%, enrichment in both replicates and p value <0.05 as cut-off. ZFH refers to ZMAT3-FLAG-HA.
Accession	Gene	Description	Crapome Found %	Ratio DoxyZFH/ZFH	p-value	log2 Ratio DoxyZFH/ZFH	-LOG10 p-VALUE	# Enriched Replicates	Doxy ZFH/ZFH	Average ZFH	Average Doxy ZFH	Abundance: ZFH (1)	Abundance: ZFH (2)	Abundance: Doxy ZFH (3)	Abundance: Doxy ZFH (4)
Q9HA38	ZMAT3	Zinc finger matrin-type protein 3	0.00139665	36865.9	0.0946797	15.17	1.024	2	1154.71	105544	1.21872e+08	100	105544	1.43919e+08	9.98253e+07
P31151	S100A7	Protein S100-A7	0.0851955	28724.6	0.0287276	14.81	1.542	2	87569		8.7569e+06	100	100	484717	1.70291e+07
O75691	UTP20	Small subunit processome component 20 homolog	0.0600559	23987.6	0.00553501	14.55	2.257	2	31135.6		3.11356e+06	100	100	1.13101e+06	5.09611e+06
P09327	VIL1	Villin-1	0.00139665	18179.2	0.000194132	14.15	3.712	2	18394.6		1.83946e+06	100	100	2.091e+06	1.58791e+06
P01834	IGKC	Immunoglobulin kappa constant	0.0502793	12331	0.0139871	13.59	1.854	2	20961.8		2.09618e+06	100	100	399374	3.79299e+06
Q9NV06	DCAF13	DDB1- and CUL4-associated factor 13	0.00977654	9410.14	9.46413e-05	13.2	4.024	2	9450.17		945017	100	100	861555	1.02848e+06
P0DOY2	IGLC2	Immunoglobulin lambda constant 2	0.0460894	8719.32	0.015102	13.09	1.821	2	14843.8		1.48438e+06	100	100	282450	2.6863e+06
P05412	JUN	Transcription factor Jun	0.0293296	8539.88	0.000484982	13.06	3.314	2	8667.66		866766	100	100	697817	1035714
Q9UHI8	ADAMTS1	A disintegrin and metalloproteinase with thrombospondin motifs 1	0.00139665	8306.36	7.4647e-06	13.02	5.127	2	8313.62		831362	100	100	810555	852169
Q9HBH1	PDF	Peptide deformylase, mitochondrial	0.0027933	6793.79	1.59587e-05	12.73	4.797	2	6810.81		681081	100	100	656956	705207
Q96F44	TRIM11	E3 ubiquitin-protein ligase TRIM11	0.00139665	5556.65	0.00163518	12.44	2.786	2	5898.75		589875	100	100	787644	392106
Q96MT7	CFAP44	Cilia- and flagella-associated protein 44	0	5148.73	0.000808213	12.33	3.092	2	5306.04		530604	100	100	657370	403837
Q8TB61	SLC35B2	Adenosine 3'-phospho 5'-phosphosulfate transporter 1	0.00558659	4672.57	0.000146361	12.19	3.835	2	4710.57		471057	100	100	423322	518791
Q9Y324	FCF1	rRNA-processing protein FCF1 homolog	0.00418994	4640.29	0.000399677	12.18	3.398	2	4692.68		469268	100	100	390584	547952
Q9Y3X0	CCDC9	Coiled-coil domain-containing protein 9	0.00418994	3326.99	6.7195e-06	11.7	5.173	2	3327.97		332797	100	100	339608	325986
Q69YU5	UQCC6	Ubiquinol-cytochrome-c reductase complex assembly factor 6	0	3019.3	1.53658e-05	11.56	4.813	2	3024.03		302403	100	100	311814	292992
Q9Y4F5	CEP170B	Centrosomal protein of 170 kDa protein B	0.047486	2740.08	0.000197194	11.42	3.705	2	2756.35		275635	100	100	245435	305834
Q13424	SNTA1	Alpha-1-syntrophin	0.0027933	2628.46	0.000194545	11.36	3.711	2	2646.3		264630	100	100	293631	235630
Q8N9B5	JMY	Junction-mediating and -regulatory protein	0.0460894	2401.97	1.02257e-05	11.23	4.99	2	2412.7		241270	100	100	235198	247343
Q9HCD5	NCOA5	Nuclear receptor coactivator 5	0.0614525	10.105	0.00604527	3.337	2.219	2	10.2716	1.02614e+06	1.054e+07	1.01463e+06	1.03764e+06	1.24291e+07	8.65102e+06
P49759	CLK1	Dual specificity protein kinase CLK1	0.0223464	6.62077	0.00156731	2.727	2.805	2	6.59429	140184	924416	150006	130363	903924	944908
P47929	LGALS7	Galectin-7	0.0600559	1243.34	0.230349	10.28	0.6376	2	35.8915	321226	1.15293e+07	321226	100	2.38966e+06	2.06689e+07
P04083	ANXA1	Annexin A1	0.0949721	2.60449	0.626652	1.381	0.203	1	5.46304	746458	4.07792e+06	341051	1.15186e+06	339589	7.81626e+06
P36952	SERPINB5	Serpin B5	0.00418994	3.07162	0.86851	1.619	0.06123	1	9.50207	142549	1.35451e+06	100	142549	100	1.35451e+06
O43791	SPOP	Speckle-type POZ protein	0.00139665	3.87447	0.277884	1.954	0.5561	1	5.43069	474678	2.57783e+06	566363	382993	4.41922e+06	736438
Q6PCB0	VWA1	von Willebrand factor A domain-containing protein 1	0	4.37111	0.0608915	2.128	1.215	1	4.68482	347887	1.62979e+06	362663	333111	1.04181e+06	2.21776e+06
Q15397	PUM3	Pumilio homolog 3	0.0363128	4.77996	0.0514199	2.257	1.289	1	5.10314	216980	1.10728e+06	218380	215580	717205	1.49736e+06
Q8IUH3	RBM45	RNA-binding protein 45	0.0027933	4.83662	0.0443273	2.274	1.353	1	4.89034	660014	3.22769e+06	519449	800578	4.06955e+06	2.38583e+06
O60292	SIPA1L3	Signal-induced proliferation-associated 1-like protein 3	0.0251397	4.99332	0.0235916	2.32	1.627	1	5.02298	2.83483e+06	1.42393e+07	2.38992e+06	3.27975e+06	1.69927e+07	1.14859e+07
Q8NEY8	PPHLN1	Periphilin-1	0.0879888	6.53415	0.0192221	2.708	1.716	1	6.63714	839849	5.5742e+06	724814	954884	6.80893e+06	4.33946e+06
P29508	SERPINB3	Serpin B3	0.0628492	16.7955	0.41408	4.07	0.3829	1	107.09	253750	2.71742e+07	385286	122214	244970	5.41034e+07
Q9UKA4	AKAP11	A-kinase anchor protein 11	0.0726257	48.0678	0.42265	5.587	0.374	1	2306		230600	100	100	100	230600
Q9UHF7	TRPS1	Zinc finger transcription factor Trps1	0.0391061	52.237	0.42265	5.707	0.374	1	2731.59		273159	100	100	273159	100
P49761	CLK3	Dual specificity protein kinase CLK3	0.0656425	53.4827	0.42265	5.741	0.374	1	2855.99		285598	100	100	285598	100
Q9NZH8	IL36G	Interleukin-36 gamma	0.00139665	56.5714	0.42265	5.822	0.374	1	3200.53		320053	100	100	100	320053
Q92817	EVPL	Envoplakin	0.00558659	57.0834	0.42265	5.835	0.374	1	3264.07		326407	100	100	100	326407
P53814	SMTN	Smoothelin	0.0153631	58.4042	0.42265	5.868	0.374	1	3414.73		341473	100	100	100	341473
Q9UN36	NDRG2	Protein NDRG2	0.00139665	58.892	0.42265	5.88	0.374	1	3474.6		347460	100	100	100	347460
Q9NRW3	APOBEC3C	DNA dC->dU-editing enzyme APOBEC-3C	0.0391061	59.2605	0.42265	5.889	0.374	1	3514.74		351474	100	100	351474	100
Q9UBH0	IL36RN	Interleukin-36 receptor antagonist protein	0	61.2229	0.42265	5.936	0.374	1	3750.54		375054	100	100	100	375054
Q92876	KLK6	Kallikrein-6	0	61.7343	0.42265	5.948	0.374	1	3812.34		381234	100	100	100	381234
Q99697	PITX2	Pituitary homeobox 2	0.00698324	62.6829	0.42265	5.97	0.374	1	3931.24		393124	100	100	393124	100
Q9BST9	RTKN	Rhotekin	0	66.487	0.42265	6.055	0.374	1	4424.95		442495	100	100	100	442495
P20585	MSH3	DNA mismatch repair protein Msh3	0.0740223	68.2615	0.42265	6.093	0.374	1	4657.85		465785	100	100	100	465785
Q9Y3D5	MRPS18C	28S ribosomal protein S18c, mitochondrial	0.0530726	76.6386	0.42265	6.26	0.374	1	5873.15		587315	100	100	100	587315
Q9Y4C8	RBM19	Probable RNA-binding protein 19	0.0321229	82.7679	0.42265	6.371	0.374	1	6850.26		685026	100	100	100	685026
Q86SG5	S100A7A	Protein S100-A7A	0.0377095	83.4014	0.42265	6.382	0.374	1	6960.43		696042	100	100	100	696042
P07476	IVL	Involucrin	0.00698324	85.4495	0.42265	6.417	0.374	1	7302.77		730277	100	100	100	730277
Q8WUJ0	STYX	Serine/threonine/tyrosine-interacting protein	0	96.9386	0.42265	6.599	0.374	1	9404.9		940490	100	100	100	940490
Q13835	PKP1	Plakophilin-1	0.0572626	128.089	0.42265	7.001	0.374	1	16363.1		1.63631e+06	100	100	100	1.63631e+06
Q7LGA3	HS2ST1	Heparan sulfate 2-O-sulfotransferase 1	0.00418994	133.436	0.42265	7.06	0.374	1	17826		1.7826e+06	100	100	100	1.7826e+06
P29034	S100A2	Protein S100-A2	0.0111732	146.322	0.42265	7.193	0.374	1	21383.6		2.13836e+06	100	100	100	2.13836e+06
P48594	SERPINB4	Serpin B4	0.047486	172.088	0.42265	7.427	0.374	1	29630.7		2.96307e+06	100	100	100	2.96307e+06
Q96BF3	TMIGD2	Transmembrane and immunoglobulin domain-containing protein 2	0	5.90349e-06	0.000142651	-17.37	3.846	0	5.8303e-06	17151775		19647894	14655656	100	100
Q9BRG2	SH2D3A	SH2 domain-containing protein 3A	0.00139665	1.19718e-05	0.00199657	-16.35	2.7	0	1.05696e-05	9.46114e+06		13880962	5.04132e+06	100	100
Q9Y6G3	MRPL42	39S ribosomal protein L42, mitochondrial	0.00418994	4.78872e-05	4.20747e-05	-14.35	4.376	0	4.77128e-05	2.09588e+06		1.95847e+06	2.23328e+06	100	100
Q15041	ARL6IP1	ADP-ribosylation factor-like protein 6-interacting protein 1	0.0139665	5.97791e-05	1.83653e-05	-14.03	4.736	0	5.95838e-05	1.67831e+06		1.74731e+06	1609309	100	100
Q9NRG7	SDR39U1	Epimerase family protein SDR39U1	0.0027933	6.06136e-05	0.00253472	-14.01	2.596	0	5.40899e-05	1.84878e+06		2.68613e+06	1.01142e+06	100	100
Q52LW3	ARHGAP29	Rho GTPase-activating protein 29	0.0111732	7.05986e-05	1.2303e-06	-13.79	5.91	0	7.06288e-05	1.41585e+06		1.43122e+06	1.40049e+06	100	100
Q96KN1	LRATD2	Protein LRATD2	0	8.51284e-05	0.00298857	-13.52	2.525	0	7.5004e-05	1.33326e+06		1.96479e+06	701735	100	100
P39210	MPV17	Protein Mpv17	0.00698324	9.71114e-05	0.000101543	-13.33	3.993	0	9.67277e-05	1.03383e+06		1.12925e+06	938405	100	100
P00395	MT-CO1	Cytochrome c oxidase subunit 1	0.0027933	0.000104081	0.000467238	-13.23	3.33	0	0.000102018	980221		1.17319e+06	787255	100	100
Q6NXE6	ARMC6	Armadillo repeat-containing protein 6	0.00418994	0.000112328	0.00015012	-13.12	3.824	0	0.000111514	896752		797050	996453	100	100
A6QL63	ABTB3	Ankyrin repeat and BTB/POZ domain-containing protein 3	0	0.000115486	0.000147599	-13.08	3.831	0	0.000114858	870638		775276	965999	100	100
Q92686	NRGN	Neurogranin	0.00837989	0.000116289	6.32477e-05	-13.07	4.199	0	0.000116011	861984		799719	924249	100	100
Q9BZL6	PRKD2	Serine/threonine-protein kinase D2	0.00418994	0.000124635	0.000116911	-12.97	3.932	0	0.000124207	805108		883298	726918	100	100
Q9UMS0	NFU1	NFU1 iron-sulfur cluster scaffold homolog, mitochondrial	0.0391061	0.000133581	1.4335e-06	-12.87	5.844	0	0.000133509	749012		740751	757273	100	100
Q6P1N9	TATDN1	Deoxyribonuclease TATDN1	0	0.000135445	5.571e-06	-12.85	5.254	0	0.000135554	737712		722363	753060	100	100
Q8IY95	TMEM192	Transmembrane protein 192	0	0.000136388	8.5131e-06	-12.84	5.07	0	0.000136552	732324		751297	713351	100	100
Q96B23	C18orf25	Protein C18orf25	0.0209497	0.000137336	3.1511e-06	-12.83	5.502	0	0.000137273	728474		717174	739774	100	100
Q9C0B1	FTO	Alpha-ketoglutarate-dependent dioxygenase FTO	0.0824022	0.000141197	0.00185509	-12.79	2.732	0	0.000131193	762236		483640	1.04083e+06	100	100
Q9NQB0	TCF7L2	Transcription factor 7-like 2	0.0223464	0.000143168	5.75256e-05	-12.77	4.24	0	0.000142651	701014		748488	653540	100	100
Q8TD10	MIPOL1	Mirror-image polydactyly gene 1 protein	0.00139665	0.000146177	0.00105143	-12.74	2.978	0	0.000140759	710434		512412	908456	100	100
P22033	MMUT	Methylmalonyl-CoA mutase, mitochondrial	0.0251397	0.000147193	0.000477091	-12.73	3.321	0	0.000144311	692946		560954	824937	100	100
Q96M27	PRRC1	Protein PRRC1	0.0153631	0.000150286	0.00101573	-12.7	2.993	0	0.000144474	692164		881634	502694	100	100
P03915	MT-ND5	NADH-ubiquinone oxidoreductase chain 5	0.00418994	0.000154511	0.00136222	-12.66	2.866	0	0.000147079	679906		892902	466909	100	100
P10619	CTSA	Lysosomal protective protein	0.0195531	0.000156668	4.994e-06	-12.64	5.302	0	0.000156654	638349		625503	651195	100	100
Q32P41	TRMT5	tRNA (guanine(37)-N1)-methyltransferase	0.027933	0.000161073	0.00550134	-12.6	2.26	0	0.000131755	758985		1193888	324083	100	100
Q8WTV0	SCARB1	Scavenger receptor class B member 1	0.00139665	0.000162193	5.64462e-05	-12.59	4.248	0	0.000161713	618379		658528	578231	100	100
Q9P2K5	MYEF2	Myelin expression factor 2	0.0377095	0.000163321	9.81328e-05	-12.58	4.008	0	0.000162721	614550		561503	667598	100	100
O95825	CRYZL1	Quinone oxidoreductase-like protein 1	0.00139665	0.000164457	6.58991e-05	-12.57	4.181	0	0.000164185	609068		566423	651713	100	100
Q8WUX2	CHAC2	Glutathione-specific gamma-glutamylcyclotransferase 2	0	0.000169081	7.9103e-06	-12.53	5.102	0	0.000168541	593326		579123	607529	100	100
Q8TDH9	BLOC1S5	Biogenesis of lysosome-related organelles complex 1 subunit 5	0	0.000169081	0.00402363	-12.53	2.395	0	0.000145754	686086		1.03102e+06	341157	100	100
Q9Y478	PRKAB1	5'-AMP-activated protein kinase subunit beta-1	0.0181564	0.000177487	0.0013347	-12.46	2.875	0	0.000169419	590251		770601	409902	100	100
Q96EV8	DTNBP1	Dysbindin	0.00139665	0.000186311	9.57121e-05	-12.39	4.019	0	0.000186217	537007		491714	582300	100	100
O75496	GMNN	Geminin	0.00558659	0.000186311	0.000200206	-12.39	3.699	0	0.000184697	541427		476057	606797	100	100
Q9BY67	CADM1	Cell adhesion molecule 1	0.0195531	0.000190226	0.000202237	-12.36	3.694	0	0.000189424	527915		463766	592064	100	100
Q92805	GOLGA1	Golgin subfamily A member 1	0.0027933	0.000194223	0.000490005	-12.33	3.31	0	0.000190879	523893		621529	426257	100	100
Q9C0F1	CEP44	Centrosomal protein of 44 kDa	0.0600559	0.000194223	0.00247091	-12.33	2.607	0	0.000178087	561522		336230	786814	100	100
Q13153	PAK1	Serine/threonine-protein kinase PAK 1	0.0712291	0.000195574	4.7518e-06	-12.32	5.323	0	0.000195964	510297		501024	519569	100	100
Q9NWW5	CLN6	Ceroid-lipofuscinosis neuronal protein 6	0.0488827	0.000201072	0.0025585	-12.28	2.592	0	0.000183118	546096		768335	323857	100	100
Q9UIJ7	AK3	GTP:AMP phosphotransferase AK3, mitochondrial	0.00837989	0.000203879	6.9195e-06	-12.26	5.16	0	0.000203334	491801		480820	502783	100	100
P55210	CASP7	Caspase-7	0.00558659	0.000208163	0.00122725	-12.23	2.911	0	0.000199866	500336		355884	644788	100	100
O00192	ARVCF	Splicing regulator ARVCF	0.00418994	0.000221562	0.000163578	-12.14	3.786	0	0.000221146	452189		403678	500700	100	100
O14734	ACOT8	Acyl-coenzyme A thioesterase 8	0.0265363	0.000224655	1.83368e-05	-12.12	4.737	0	0.000224786	444867		460879	428854	100	100
Q9BU61	NDUFAF3	NADH dehydrogenase [ubiquinone] 1 alpha subcomplex assembly factor 3	0.0544693	0.000226218	0.000108037	-12.11	3.966	0	0.000225794	442881		404476	481286	100	100
Q9BW91	NUDT9	ADP-ribose pyrophosphatase, mitochondrial	0	0.000230971	0.0046751	-12.08	2.33	0	0.000197348	506720		243633	769806	100	100
Q9UIL1	SCOC	Short coiled-coil protein	0.0321229	0.000230971	0.000160692	-12.08	3.794	0	0.000229843	435080		481138	389022	100	100
Q8WWH5	TRUB1	Pseudouridylate synthase TRUB1	0.0181564	0.000235824	0.00041407	-12.05	3.383	0	0.000232477	430149		357554	502744	100	100
Q9NSB4	KRT82	Keratin, type II cuticular Hb2	0.0530726	0.000235824	0.000859689	-12.05	3.066	0	0.000228994	436692		541715	331670	100	100
Q92466	DDB2	DNA damage-binding protein 2	0.00558659	0.000242454	0.00330965	-12.01	2.48	0	0.000216189	462558		668646	256470	100	100
A6NKD9	CCDC85C	Coiled-coil domain-containing protein 85C	0.0740223	0.000244141	0.000404701	-12	3.393	0	0.000240454	415881		346642	485119	100	100
Q0ZGT2	NEXN	Nexilin	0.0642458	0.000256278	0.000528612	-11.93	3.277	0	0.000252217	396484		471405	321564	100	100
Q9BWQ6	YIPF2	Protein YIPF2	0.00139665	0.000259856	0.000683112	-11.91	3.166	0	0.000253049	395180		479411	310948	100	100
Q8N2U0	TMEM256	Transmembrane protein 256	0.00837989	0.00026902	6.45813e-05	-11.86	4.19	0	0.000269332	371289		346650	395928	100	100
Q96DB5	RMDN1	Regulator of microtubule dynamics protein 1	0.0167598	0.000270891	0.000233256	-11.85	3.632	0	0.000268268	372762		326399	419124	100	100
Q6NTE8	MRNIP	MRN complex-interacting protein	0.00139665	0.000274672	1.36763e-05	-11.83	4.864	0	0.000275529	362938		351966	373910	100	100
P24386	CHM	Rab proteins geranylgeranyltransferase component A 1	0	0.000286337	0.00142329	-11.77	2.847	0	0.000272632	366795		476491	257098	100	100
Q9UJ83	HACL1	2-hydroxyacyl-CoA lyase 1	0.00558659	0.000290334	0.000600658	-11.75	3.221	0	0.000283609	352598		283053	422143	100	100
O14657	TOR1B	Torsin-1B	0	0.000294387	0.000489214	-11.73	3.311	0	0.000289267	345701		407033	284369	100	100
Q96KQ7	EHMT2	Histone-lysine N-methyltransferase EHMT2	0.0544693	0.000294387	0.000539454	-11.73	3.268	0	0.000289146	345846		281361	410330	100	100
O00418	EEF2K	Eukaryotic elongation factor 2 kinase	0.0418994	0.000296434	0.00817743	-11.72	2.087	0	0.000230714	433438		706113	160762	100	100
P51948	MNAT1	CDK-activating kinase assembly factor MAT1	0.0670391	0.000296434	0.000683648	-11.72	3.165	0	0.000290647	344060		416443	271677	100	100
Q96E09	PABIR1	PPP2R1A-PPP2R2A-interacting phosphatase regulator 1	0.0027933	0.000313336	0.000131789	-11.64	3.88	0	0.000312803	319690		290464	348915	100	100
O15121	DEGS1	Sphingolipid delta(4)-desaturase DES1	0.00139665	0.000315516	0.00625052	-11.63	2.204	0	0.000260305	384164		601040	167289	100	100
Q70UQ0	IKBIP	Inhibitor of nuclear factor kappa-B kinase-interacting protein	0.0195531	0.000315516	0.000684753	-11.63	3.164	0	0.00030822	324444		392058	256829	100	100
P53609	PGGT1B	Geranylgeranyl transferase type-1 subunit beta	0	0.00031992	0.00134766	-11.61	2.87	0	0.000305923	326880		421143	232617	100	100
Q9BU89	DOHH	Deoxyhypusine hydroxylase	0.00837989	0.00031992	0.00016032	-11.61	3.795	0	0.000317362	315097		283089	347106	100	100
Q9UHY8	FEZ2	Fasciculation and elongation protein zeta-2	0.00139665	0.000322145	0.000191378	-11.6	3.718	0	0.000320803	311718		346365	277071	100	100
P10114	RAP2A	Ras-related protein Rap-2a	0.0153631	0.000328914	8.45895e-05	-11.57	4.073	0	0.000327723	305135		282724	327547	100	100
Q9NRR5	UBQLN4	Ubiquilin-4	0.0307263	0.000328914	0.000979868	-11.57	3.009	0	0.00031911	313372		390308	236435	100	100
P61225	RAP2B	Ras-related protein Rap-2b	0.0195531	0.000350087	0.00315896	-11.48	2.5	0	0.000318496	313976		181541	446411	100	100
P49902	NT5C2	Cytosolic purine 5'-nucleotidase	0.0488827	0.000352522	0.00177426	-11.47	2.751	0	0.000332934	300360		397324	203396	100	100
Q96Q45	TMEM237	Transmembrane protein 237	0	0.000380451	0.000708752	-11.36	3.15	0	0.00037271	268305		323925	212685	100	100
O95817	BAG3	BAG family molecular chaperone regulator 3	0.0963687	0.000393868	0.000231992	-11.31	3.635	0	0.000389415	256796		226166	287426	100	100
Q9BTY2	FUCA2	Plasma alpha-L-fucosidase	0.00418994	0.000404941	0.000309334	-11.27	3.51	0	0.000401744	248915		214732	283097	100	100
P52630	STAT2	Signal transducer and activator of transcription 2	0.0432961	0.000407758	0.00074233	-11.26	3.129	0	0.000399333	250418		197970	302866	100	100
A5D8V6	VPS37C	Vacuolar protein sorting-associated protein 37C	0.0027933	0.000419221	1.05191e-05	-11.22	4.978	0	0.000420786	237650		243695	231606	100	100
Q96A19	CCDC102A	Coiled-coil domain-containing protein 102A	0	0.000425074	0.21662	-11.2	0.6643	0	0.0330839	1.82844e+07	604920	1.83245e+07	1.82443e+07	604920	100
O43156	TTI1	TELO2-interacting protein 1 homolog	0.0139665	0.000452436	4.55231e-05	-11.11	4.342	0	0.000451578	221446		232520	210371	100	100
P20226	TBP	TATA-box-binding protein	0.0223464	0.000455583	0.000210311	-11.1	3.677	0	0.000452798	220849		196224	245474	100	100
O95602	POLR1A	DNA-directed RNA polymerase I subunit RPA1	0.0307263	0.000468391	0.00173872	-11.06	2.76	0	0.00044526	224588		294006	155169	100	100
O94966	USP19	Ubiquitin carboxyl-terminal hydrolase 19	0.0251397	0.000526967	0.000141331	-10.89	3.85	0	0.000526516	189928		172520	207335	100	100
Q86UE8	TLK2	Serine/threonine-protein kinase tousled-like 2	0.027933	0.000526967	0.000116668	-10.89	3.933	0	0.000525233	190392		205897	174886	100	100
Q5T447	HECTD3	E3 ubiquitin-protein ligase HECTD3	0.00418994	0.000530632	0.00105556	-10.88	2.977	0	0.000516006	193796		240298	147295	100	100
Q96Q15	SMG1	Serine/threonine-protein kinase SMG1	0.0195531	0.00053804	0.00247173	-10.86	2.607	0	0.000501688	199327		270826	127828	100	100
Q9H008	LHPP	Phospholysine phosphohistidine inorganic pyrophosphate phosphatase	0.00139665	0.000557014	0.000305485	-10.81	3.515	0	0.000554941	180199		156612	203786	100	100
P49407	ARRB1	Beta-arrestin-1	0	0.000580668	6.09e-07	-10.75	6.215	0	0.000581043	172104		170836	173373	100	100
P11047	LAMC1	Laminin subunit gamma-1	0.0502793	0.000580668	4.37942e-05	-10.75	4.359	0	0.000579867	172453		180586	164321	100	100
Q9P0J7	KCMF1	E3 ubiquitin-protein ligase KCMF1	0.0307263	0.000626673	0.000450655	-10.64	3.346	0	0.000621941	160787		185903	135671	100	100
Q9NVD7	PARVA	Alpha-parvin	0.0125698	0.000639841	0.00127552	-10.61	2.894	0	0.00061804	161802		203491	120113	100	100
Q9NY74	ETAA1	Ewing's tumor-associated antigen 1	0.0027933	0.000676323	0.000112965	-10.53	3.947	0	0.000673643	148447		159885	137008	100	100
Q9H1Z4	WDR13	WD repeat-containing protein 13	0	0.000681027	0.000105737	-10.52	3.976	0	0.00067883	147312		136332	158293	100	100
Q9NZD8	SPG21	Maspardin	0.00837989	0.000709948	0.0034107	-10.46	2.467	0	0.000651614	153465		214915	92014.8	100	100
Q9UBP0	SPAST	Spastin	0	0.000714886	0.00286675	-10.45	2.543	0	0.000664037	150594		206474	94714.5	100	100
Q8WVF1	OSCP1	ProteinCP1	0.00139665	0.000809882	0.00253521	-10.27	2.596	0	0.000758434	131851		177395	86306.4	100	100
Q96SY0	INTS14	Integrator complex subunit 14	0.00698324	0.000844275	0.00147535	-10.21	2.831	0	0.000810526	123377		156293	90460	100	100
O94829	IPO13	Importin-13	0.00139665	0.000850147	0.000116802	-10.2	3.933	0	0.000847355	118014		127218	108810	100	100
Q6ZN18	AEBP2	Zinc finger protein AEBP2	0.0027933	0.000917503	0.000222711	-10.09	3.652	0	0.00091069	109807		98236.5	121377	100	100
Q9H4G4	GLIPR2	Golgi-associated plant pathogenesis-related protein 1	0.00977654	0.00299132	0.320944	-8.385	0.4936	0	0.253982	2.84431e+06	722402	2678069	3.01054e+06	722402	100
Q16595	FXN	Frataxin, mitochondrial	0.0307263	0.00306691	0.312961	-8.349	0.5045	0	0.231939	2.4728e+06	573538	2.51461e+06	2.43099e+06	573538	100
O43678	NDUFA2	NADH dehydrogenase [ubiquinone] 1 alpha subcomplex subunit 2	0.0153631	0.00362199	0.346663	-8.109	0.4601	0	0.359856	2.77414e+06	998292	3.08129e+06	2.46699e+06	998292	100
Q3V6T2	CCDC88A	Girdin	0.0195531	0.00408627	0.42265	-7.935	0.374	0	1.66856e-05	5993202		5993202	100	100	100
Q93096	PTP4A1	Protein tyrosine phosphatase type IVA 1	0.00139665	0.00419533	0.3294	-7.897	0.4823	0	0.30273	1.72764e+06	523007	1.86839e+06	1.58689e+06	100	523007
O43657	TSPAN6	Tetraspanin-6	0	0.00454659	0.302999	-7.781	0.5186	0	0.22558	1.12418e+06	253592	938373	1.30998e+06	253592	100
P15586	GNS	N-acetylglucosamine-6-sulfatase	0.0488827	0.00493409	0.360664	-7.663	0.4429	0	0.4481	1.86781e+06	836966	1672650	2.06297e+06	836966	100
P60673	PFN3	Profilin-3	0.00139665	0.0051794	0.346003	-7.593	0.4609	0	0.366929	1.46814e+06	538704	1.85697e+06	1.07932e+06	100	538704
Q9NY27	PPP4R2	Serine/threonine-protein phosphatase 4 regulatory subunit 2	0.0642458	0.00533979	0.328376	-7.549	0.4836	0	0.313827	1.11592e+06	350206	1.23367e+06	998167	100	350206
Q9UH65	SWAP70	Switch-associated protein 70	0.0460894	0.00545578	0.342694	-7.518	0.4651	0	0.25154	1.5762e+06	396477	2.65015e+06	502247	100	396477
Q8IZ83	ALDH16A1	Aldehyde dehydrogenase family 16 member A1	0.0377095	0.00550516	0.35511	-7.505	0.4496	0	0.41277	1.45919e+06	602310	1.84245e+06	1.07593e+06	100	602310
P42785	PRCP	Lysosomal Pro-X carboxypeptidase	0.0125698	0.00558588	0.329386	-7.484	0.4823	0	0.32202	1.03721e+06	334003	1.11877e+06	955657	334003	100
Q16625	OCLN	Occludin	0.0139665	0.00565209	0.377083	-7.467	0.4236	0	0.541199	1.791e+06	969289	1.35546e+06	2.22655e+06	969289	100
Q9BXK5	BCL2L13	Bcl-2-like protein 13	0.00558659	0.00575886	0.376038	-7.44	0.4248	0	0.54433	1.69109e+06	920509	1.96745e+06	1.41472e+06	100	920509
P06865	HEXA	Beta-hexosaminidase subunit alpha	0.0307263	0.00578286	0.317163	-7.434	0.4987	0	0.285371	852875	243385	890679	815072	100	243385
Q8N1F8	STK11IP	Serine/threonine-protein kinase 11-interacting protein	0.0125698	0.00606616	0.335238	-7.365	0.4746	0	0.348462	955813	333065	1.05766e+06	853964	100	333065
Q96D53	COQ8B	Atypical kinase COQ8B, mitochondrial	0.00418994	0.00610836	0.300271	-7.355	0.5225	0	0.240464	651349	156626	707427	595271	100	156626
Q8NB46	ANKRD52	Serine/threonine-protein phosphatase 6 regulatory ankyrin repeat subunit C	0.0139665	0.00615084	0.259524	-7.345	0.5858	0	0.158883	430400	68383.2	496807	363992	68383.2	100
Q9P2W9	STX18	Syntaxin-18	0.00698324	0.00618933	0.38839	-7.336	0.4107	0	0.635655	1.71371e+06	1.08933e+06	1.99325e+06	1.43416e+06	100	1.08933e+06
P35052	GPC1	Glypican-1	0.0125698	0.00625836	0.417256	-7.32	0.3796	0	0.896837	2.43813e+06	2.1866e+06	1.83614e+06	3.04012e+06	2.1866e+06	100
Q9Y6M9	NDUFB9	NADH dehydrogenase [ubiquinone] 1 beta subcomplex subunit 9	0.00837989	0.00651509	0.374764	-7.262	0.4262	0	0.523899	1.35111e+06	707844	1.74435e+06	957870	100	707844
Q96G46	DUS3L	tRNA-dihydrouridine(47) synthase [NAD(P)(+)]-like	0.00558659	0.00661978	0.340914	-7.239	0.4674	0	0.377956	868322	328188	798368	938276	100	328188
Q9UIV1	CNOT7	CCR4-NOT transcription complex subunit 7	0.0167598	0.0067215	0.380174	-7.217	0.42	0	0.553607	1.36714e+06	756860	1.80872e+06	925564	100	756860
Q9GZT4	SRR	Serine racemase	0.0027933	0.00681061	0.368181	-7.198	0.4339	0	0.513329	1.1186e+06	574211	1.19313e+06	1.04408e+06	100	574211
P98172	EFNB1	Ephrin-B1	0.00837989	0.00719894	0.389257	-7.118	0.4098	0	0.618632	1.33802e+06	827741	1.77284e+06	903197	100	827741
Q9BXR0	QTRT1	Queuine tRNA-ribosyltransferase catalytic subunit 1	0.00558659	0.00722894	0.362335	-7.112	0.4409	0	0.452668	977202	442348	650941	1.30346e+06	442348	100
Q96JM4	LRRIQ1	Leucine-rich repeat and IQ domain-containing protein 1	0.00139665	0.00738595	0.428864	-7.081	0.3677	0	1.07876	1.99364e+06	2.15066e+06	2123200	1.86408e+06	100	2.15066e+06
Q9BYM8	RBCK1	RanBP-type and C3HC4-type zinc finger-containing protein 1	0	0.00743217	0.341153	-7.072	0.4671	0	0.348455	751557	261884	1.05077e+06	452347	100	261884
P78310	CXADR	Coxsackievirus and adenovirus receptor	0.00698324	0.00743733	0.321196	-7.071	0.4932	0	0.309453	577645	178754	475733	679556	178754	100
O14787	TNPO2	Transportin-2	0.0977654	0.00755685	0.380689	-7.048	0.4194	0	0.600018	1.0584e+06	635060	1.15877e+06	958037	100	635060
Q9UNS1	TIMELESS	Protein timeless homolog	0.0335196	0.00763583	0.367946	-7.033	0.4342	0	0.520796	897883	467614	955423	840342	100	467614
P61599	NAA20	N-alpha-acetyltransferase 20	0	0.00764112	0.327653	-7.032	0.4846	0	0.33282	588580	195891	691741	485419	195891	100
O94763	URI1	Unconventional prefoldin RPB5 interactor 1	0.0321229	0.00764112	0.402477	-7.032	0.3953	0	0.776425	1.33566e+06	1.03704e+06	1376568	1.29475e+06	100	1.03704e+06
Q9P260	RELCH	RAB11-binding protein RELCH	0.0432961	0.0076996	0.28712	-7.021	0.5419	0	0.226373	384527	87046.5	416814	352239	100	87046.5
Q9GZY8	MFF	Mitochondrial fission factor	0.00977654	0.00778008	0.332167	-7.006	0.4786	0	0.345508	602244	208080	739433	465055	100	208080
Q15904	ATP6AP1	V-type proton ATPase subunit S1	0.0167598	0.00794906	0.395253	-6.975	0.4031	0	0.709862	1.14244e+06	810975	1.27418e+06	1.0107e+06	810975	100
Q9BQ69	MACROD1	ADP-ribose glycohydrolase MACROD1	0.0181564	0.00807121	0.432594	-6.953	0.3639	0	0.996966	1.8915e+06	1.88576e+06	1.07028e+06	2712720	1.88576e+06	100
P60033	CD81	CD81 antigen	0.00558659	0.00817254	0.394691	-6.935	0.4037	0	0.712081	1.07043e+06	762233	984214	1.15664e+06	100	762233
O75380	NDUFS6	NADH dehydrogenase [ubiquinone] iron-sulfur protein 6, mitochondrial	0.023743	0.00826941	0.329159	-6.918	0.4826	0	0.350146	514423	180123	551897	476950	100	180123
Q8NI22	MCFD2	Multiple coagulation factor deficiency protein 2	0.0111732	0.00829812	0.39658	-6.913	0.4017	0	0.7239	1.06793e+06	773074	944132	1191725	100	773074
Q9BQC3	DPH2	2-(3-amino-3-carboxypropyl)histidine synthase subunit 2	0.00139665	0.00841979	0.35651	-6.892	0.4479	0	0.410088	713624	292648	1.02254e+06	404710	100	292648
Q9NWV4	CZIB	CXXC motif containing zinc binding protein	0.00977654	0.00846661	0.411167	-6.884	0.386	0	0.843019	1.23906e+06	1.04455e+06	942284	1.53583e+06	1.04455e+06	100
Q9P000	COMMD9	COMM domain-containing protein 9	0.0153631	0.00848423	0.383455	-6.881	0.4163	0	0.62347	879838	548552	982331	777344	548552	100
Q9UPN7	PPP6R1	Serine/threonine-protein phosphatase 6 regulatory subunit 1	0.0698324	0.00868054	0.43379	-6.848	0.3627	0	1.14314	1.53288e+06	1.75229e+06	1.67187e+06	1.39389e+06	100	1.75229e+06
P09417	QDPR	Dihydropteridine reductase	0.0712291	0.00877126	0.42265	-6.833	0.374	0	7.68988e-05	1.30041e+06		100	1.30041e+06	100	100
Q5SRE5	NUP188	Nucleoporin NUP188	0.0726257	0.00879561	0.390062	-6.829	0.4089	0	0.662611	893719	592189	1.08558e+06	701862	100	592189
Q9NQR4	NIT2	Omega-amidase NIT2	0.0223464	0.00885066	0.396699	-6.82	0.4015	0	0.729775	941702	687230	851380	1.03202e+06	687230	100
Q01167	FOXK2	Forkhead box protein K2	0.0488827	0.00897421	0.393093	-6.8	0.4055	0	0.705893	875907	618297	868847	882967	100	618297
Q96S82	UBL7	Ubiquitin-like protein 7	0	0.00900536	0.3402	-6.795	0.4683	0	0.399504	492599	196795	504594	480603	196795	100
Q9NVT9	ARMC1	Armadillo repeat-containing protein 1	0.0181564	0.00903663	0.389996	-6.79	0.4089	0	0.68135	835145	569026	806543	863747	569026	100
P46020	PHKA1	Phosphorylase b kinase regulatory subunit alpha, skeletal muscle isoform	0.0446927	0.00926496	0.380108	-6.754	0.4201	0	0.606626	716672	434752	797184	636161	100	434752
Q6PJ69	TRIM65	Tripartite motif-containing protein 65	0.0377095	0.00929712	0.365879	-6.749	0.4367	0	0.478296	641511	306832	404367	878656	100	306832
Q4G0N4	NADK2	NAD kinase 2, mitochondrial	0.023743	0.00932294	0.381551	-6.745	0.4184	0	0.602372	730831	440232	566232	895430	440232	100
Q13643	FHL3	Four and a half LIM domains protein 3	0.0544693	0.00934234	0.415784	-6.742	0.3811	0	0.922963	1.05248e+06	971398	1.07856e+06	1.0264e+06	100	971398
Q15796	SMAD2	Mothers against decapentaplegic homolog 2	0.0139665	0.00947276	0.428019	-6.722	0.3685	0	1.07294	1.18693e+06	1273507	1216340	1157519	100	1273507
Q8NFH5	NUP35	Nucleoporin NUP35	0.023743	0.00961832	0.418305	-6.7	0.3785	0	0.946101	1.02712e+06	971755	1.10792e+06	946312	100	971755
Q9BVC5	C2orf49	Ashwin	0.0027933	0.00962498	0.42265	-6.699	0.374	0	9.23982e-05	1.08227e+06		1.08227e+06	100	100	100
Q9NYJ1	COA4	Cytochrome c oxidase assembly factor 4 homolog, mitochondrial	0.0209497	0.00985451	0.346673	-6.665	0.4601	0	0.433326	447160	193766	436043	458277	100	193766
P83436	COG7	Conserved oligomeric Golgi complex subunit 7	0.0614525	0.00986134	0.404817	-6.664	0.3927	0	0.809065	835351	675853	889783	780919	100	675853
O43292	GPAA1	Glycosylphosphatidylinositol anchor attachment 1 protein	0	0.00995061	0.414669	-6.651	0.3823	0	0.90385	922491	833793	1.01872e+06	826256	100	833793
Q9H9E3	COG4	Conserved oligomeric Golgi complex subunit 4	0.0027933	0.00999207	0.408199	-6.645	0.3891	0	0.842679	846636	713443	893129	800143	100	713443
Q6NSW5	DENND10P1	Putative DENN domain-containing protein 10 B	0	0.0100268	0.384547	-6.64	0.4151	0	0.636083	650608	413841	757959	543258	100	413841
Q96FX8	PERP	p53 apoptosis effector related to PMP-22	0	0.0100616	0.380328	-6.635	0.4198	0	0.618342	611968	378405	644225	579711	378405	100
P09455	RBP1	Retinol-binding protein 1	0.00418994	0.0100755	0.423407	-6.633	0.3732	0	0.983517	1.01047e+06	993813	1.21174e+06	809199	993813	100
Q9H446	RWDD1	RWD domain-containing protein 1	0	0.0100895	0.383152	-6.631	0.4166	0	0.637957	626845	399900	637616	616074	399900	100
Q7Z7H8	MRPL10	39S ribosomal protein L10, mitochondrial	0.047486	0.0101386	0.453577	-6.624	0.3433	0	1.4658	1.43048e+06	2.09679e+06	1.4722e+06	1388753	100	2.09679e+06
O95169	NDUFB8	NADH dehydrogenase [ubiquinone] 1 beta subcomplex subunit 8, mitochondrial	0.00139665	0.0102588	0.370219	-6.607	0.4315	0	0.549642	533061	292993	608848	457274	100	292993
Q12846	STX4	Syntaxin-4	0.00139665	0.0102944	0.391335	-6.602	0.4075	0	0.698863	659530	460922	663079	655982	100	460922
Q7L9B9	EEPD1	Endonuclease/exonuclease/phosphatase family domain-containing protein 1	0.00418994	0.0104236	0.40081	-6.584	0.3971	0	0.570563	858893	490053	321651	1.39614e+06	490053	100
Q96E11	MRRF	Ribosome-recycling factor, mitochondrial	0.027933	0.0104961	0.389126	-6.574	0.4099	0	0.683653	620285	424060	613819	626752	100	424060
Q6P1A2	LPCAT3	Lysophospholipid acyltransferase 5	0.00139665	0.0105911	0.434697	-6.561	0.3618	0	1.15172	1.03225e+06	1.18887e+06	1.01344e+06	1.05105e+06	100	1.18887e+06
Q9H1E5	TMX4	Thioredoxin-related transmembrane protein 4	0.00139665	0.0106205	0.42265	-6.557	0.374	0	0.000112838	886223		886223	100	100	100
Q96AA3	RFT1	Protein RFT1 homolog	0	0.0106279	0.38873	-6.556	0.4104	0	0.6804	603390	410546	593679	613100	100	410546
P19838	NFKB1	Nuclear factor NF-kappa-B p105 subunit	0.0181564	0.0106426	0.387791	-6.554	0.4114	0	0.674113	595399	401367	623886	566913	100	401367
Q9UIQ6	LNPEP	Leucyl-cystinyl aminopeptidase	0.00558659	0.0106796	0.384876	-6.549	0.4147	0	0.646684	576334	372706	650157	502512	100	372706
P53367	ARFIP1	Arfaptin-1	0.0418994	0.0106796	0.36413	-6.549	0.4387	0	0.525911	460552	242209	459440	461664	242209	100
Q9BRT2	UQCC2	Ubiquinol-cytochrome-c reductase complex assembly factor 2	0.00837989	0.0108889	0.364786	-6.521	0.438	0	0.528744	447540	236634	417524	477555	100	236634
Q9BYC8	MRPL32	39S ribosomal protein L32, mitochondrial	0.0432961	0.010904	0.44117	-6.519	0.3554	0	1.20971	1.07207e+06	1.29689e+06	835365	1.30877e+06	100	1.29689e+06
Q7Z7K0	CMC1	COX assembly mitochondrial protein homolog	0.0698324	0.0110256	0.42265	-6.503	0.374	0	0.000121494	823088		100	823088	100	100
Q8WV22	NSMCE1	Non-structural maintenance of chromosomes element 1 homolog	0.00418994	0.0111486	0.415213	-6.487	0.3817	0	0.915264	740213	677490	689471	790956	677490	100
Q969M3	YIPF5	Protein YIPF5	0.0125698	0.0112261	0.427212	-6.477	0.3694	0	1.04938	840949	882477	919482	762416	100	882477
Q96B54	ZNF428	Zinc finger protein 428	0.00558659	0.0113356	0.361964	-6.463	0.4413	0	0.510507	407224	207891	346385	468064	100	207891
P20248	CCNA2	Cyclin-A2	0.0027933	0.0113434	0.416511	-6.462	0.3804	0	0.880441	750013	660342	526962	973064	100	660342
Q96HY6	DDRGK1	DDRGK domain-containing protein 1	0.0684358	0.0113434	0.401876	-6.462	0.3959	0	0.789783	614038	484957	598664	629413	484957	100
Q8TF71	SLC16A10	Monocarboxylate transporter 10	0	0.011367	0.378225	-6.459	0.4222	0	0.535525	513926	275221	288449	739404	100	275221
Q6QNY1	BLOC1S2	Biogenesis of lysosome-related organelles complex 1 subunit 2	0.0642458	0.011454	0.400117	-6.448	0.3978	0	0.764683	595695	455518	511182	680208	455518	100
P51798	CLCN7	H(+)/Cl(-) exchange transporter 7	0.0223464	0.0116947	0.394146	-6.418	0.4043	0	0.727968	532051	387316	543704	520399	100	387316
Q7L3S4	ZNF771	Zinc finger protein 771	0.0027933	0.0117028	0.41568	-6.417	0.3812	0	0.921969	675036	622363	713397	636675	100	622363
Q9P2B4	CTTNBP2NL	CTTNBP2 N-terminal-like protein	0.0698324	0.0117028	0.39811	-6.417	0.4	0	0.757912	555435	420971	581474	529396	420971	100
P53778	MAPK12	Mitogen-activated protein kinase 12	0.00558659	0.0118415	0.42265	-6.4	0.374	0	0.000140189	713325		713325	100	100	100
Q5J8M3	EMC4	ER membrane protein complex subunit 4	0.0027933	0.011858	0.432312	-6.398	0.3642	0	1.09594	806314	883671	952281	660347	100	883671
Q16698	DECR1	2,4-dienoyl-CoA reductase [(3E)-enoyl-CoA-producing], mitochondrial	0.0321229	0.0118826	0.402774	-6.395	0.3949	0	0.79059	570506	451036	492328	648684	100	451036
P42356	PI4KA	Phosphatidylinositol 4-kinase alpha	0.0418994	0.0118991	0.384174	-6.393	0.4155	0	0.549664	512690	281807	259561	765819	100	281807
Q8NBJ7	SUMF2	Inactive C-alpha-formylglycine-generating enzyme 2	0.0251397	0.011957	0.364548	-6.386	0.4382	0	0.536525	375159	201282	384998	365320	201282	100
Q9BW61	DDA1	DET1- and DDB1-associated protein 1	0.00558659	0.0120152	0.417258	-6.379	0.3796	0	0.937631	652952	612228	604750	701154	100	612228
P42773	CDKN2C	Cyclin-dependent kinase 4 inhibitor C	0	0.0120485	0.42265	-6.375	0.374	0	0.000145066	689343		689343	100	100	100
Q6PL24	TMED8	Protein TMED8	0	0.0121071	0.369329	-6.368	0.4326	0	0.551886	388853	214602	320954	456752	214602	100
Q13901	C1D	Nuclear nucleic acid-binding protein C1D	0.00558659	0.0121323	0.41539	-6.365	0.3815	0	0.921952	625280	576478	626047	624513	576478	100
Q9BVV7	TIMM21	Mitochondrial import inner membrane translocase subunit Tim21	0.00837989	0.0121492	0.422074	-6.363	0.3746	0	0.991684	673543	667942	708377	638710	100	667942
O43505	B4GAT1	Beta-1,4-glucuronyltransferase 1	0.00418994	0.0123273	0.416823	-6.342	0.38	0	0.927946	619160	574548	691719	546602	100	574548
Q8N3F8	MICALL1	MICAL-like protein 1	0.0712291	0.0123787	0.391274	-6.336	0.4075	0	0.705374	464237	327461	508360	420114	100	327461
Q3ZCW2	LGALSL	Galectin-related protein	0.00139665	0.0123873	0.418704	-6.335	0.3781	0	0.928563	634311	588998	497098	771524	100	588998
Q9UJA5	TRMT6	tRNA (adenine(58)-N(1))-methyltransferase non-catalytic subunit TRM6	0.0628492	0.0124389	0.402534	-6.329	0.3952	0	0.798173	517902	413376	553628	482177	100	413376
O00257	CBX4	E3 SUMO-protein ligase CBX4	0.00837989	0.0125254	0.39391	-6.319	0.4046	0	0.727994	465831	339122	489364	442298	100	339122
Q08431	MFGE8	Lactadherin	0.00977654	0.0125515	0.4427	-6.316	0.3539	0	1.25188	809489	1.01339e+06	692081	926897	1.01339e+06	100
Q96EC8	YIPF6	Protein YIPF6	0	0.0126475	0.412605	-6.305	0.3845	0	0.889535	560225	498340	609026	511425	100	498340
Q969T7	NT5C3B	7-methylguanosine phosphate-specific 5'-nucleotidase	0	0.0126739	0.369263	-6.302	0.4327	0	0.437122	407659	178197	643639	171679	178197	100
Q53S58	TMEM177	Transmembrane protein 177	0	0.0127002	0.435668	-6.299	0.3608	0	1.10688	743345	822796	948735	537954	100	822796
Q6UW02	CYP20A1	Cytochrome P450 20A1	0	0.0128152	0.401603	-6.286	0.3962	0	0.773986	490286	379474	587132	393439	100	379474
Q8IUR7	ARMC8	Armadillo repeat-containing protein 8	0.00837989	0.0128865	0.389645	-6.278	0.4093	0	0.697941	420821	293708	404606	437035	100	293708
Q9ULJ8	PPP1R9A	Neurabin-1	0.0181564	0.0130663	0.42265	-6.258	0.374	0	0.000170765	585601		100	585601	100	100
Q96GX2	ATXN7L3B	Ataxin-7-like protein 3B	0.0027933	0.0131208	0.42265	-6.252	0.374	0	0.000172184	580774		100	580774	100	100
Q96BP2	CHCHD1	Coiled-coil-helix-coiled-coil-helix domain-containing protein 1	0.0921788	0.0131299	0.431649	-6.251	0.3649	0	1.10486	644325	711887	682458	606191	100	711887
Q8NHH9	ATL2	Atlastin-2	0.0167598	0.0131664	0.42581	-6.247	0.3708	0	1.00105	610748	611391	755833	465662	100	611391
P57076	CFAP298	Cilia- and flagella-associated protein 298	0.0153631	0.0133502	0.42467	-6.227	0.3719	0	1.00257	581045	582537	683028	479061	582537	100
O14548	COX7A2L	Cytochrome c oxidase subunit 7A-related protein, mitochondrial	0.00139665	0.013443	0.387108	-6.217	0.4122	0	0.66262	385570	255486	472126	299013	100	255486
Q9UHK0	NUFIP1	FMR1-interacting protein NUFIP1	0.00558659	0.0134523	0.3884	-6.216	0.4107	0	0.68589	385298	264272	337246	433349	100	264272
Q9UBN7	HDAC6	Histone deacetylase 6	0.0377095	0.013471	0.428703	-6.214	0.3678	0	1.02201	607842	621221	771202	444482	100	621221
Q9NPI0	TMEM138	Transmembrane protein 138	0	0.0136401	0.366037	-6.196	0.4365	0	0.55309	298016	164830	309846	286187	100	164830
Q9UBC1	NFKBIL1	NF-kappa-B inhibitor-like protein 1	0.00698324	0.0138305	0.336	-6.176	0.4737	0	0.415928	219235	91185.9	202371	236099	91185.9	100
O15127	SCAMP2	Secretory carrier-associated membrane protein 2	0.0125698	0.0139848	0.39329	-6.16	0.4053	0	0.724972	375662	272344	332397	418926	272344	100
Q6ZN55	ZNF574	Zinc finger protein 574	0.0153631	0.0140042	0.388215	-6.158	0.4109	0	0.692134	354538	245388	328112	380965	100	245388
Q7Z5G4	GOLGA7	Golgin subfamily A member 7	0.0027933	0.0140236	0.378633	-6.156	0.4218	0	0.62591	321448	201198	287089	355808	201198	100
O43314	PPIP5K2	Inositol hexakisphosphate and diphosphoinositol-pentakisphosphate kinase 2	0.027933	0.0140723	0.449178	-6.151	0.3476	0	1.33672	690957	923614	794516	587398	100	923614
Q9H6R7	WDCP	WD repeat and coiled-coil-containing protein	0.00837989	0.0142885	0.426524	-6.129	0.3701	0	1.02437	517451	530061	429435	605468	100	530061
Q9H6U6	BCAS3	BCAS3 microtubule associated cell migration factor	0.047486	0.0143083	0.417734	-6.127	0.3791	0	0.944278	463595	437763	433034	494156	437763	100
Q7L5Y1	ENOSF1	Mitochondrial enolase superfamily member 1	0	0.0144179	0.440197	-6.116	0.3564	0	1.21864	585979	714095	598358	573599	714095	100
Q14457	BECN1	Beclin-1	0	0.0144479	0.416119	-6.113	0.3808	0	0.929315	446153	414617	421702	470604	100	414617
Q5T2E6	ARMH3	Armadillo-like helical domain-containing protein 3	0.0027933	0.0144779	0.42265	-6.11	0.374	0	0.000209672	476934		476934	100	100	100
Q0VDG4	SCRN3	Secernin-3	0.00418994	0.0144779	0.366315	-6.11	0.4361	0	0.553948	269180	149112	305316	233044	149112	100
P27540	ARNT	Aryl hydrocarbon receptor nuclear translocator	0.0209497	0.0145181	0.373965	-6.106	0.4272	0	0.586388	290817	170532	233213	348422	100	170532
Q6UXH1	CRELD2	Protein disulfide isomerase CRELD2	0.00139665	0.0145383	0.395199	-6.104	0.4032	0	0.726853	358968	260917	285420	432516	260917	100
Q6UW78	UQCC3	Ubiquinol-cytochrome-c reductase complex assembly factor 3	0.00558659	0.0145887	0.431603	-6.099	0.3649	0	1.10262	519641	572966	545372	493910	100	572966
Q9BQT8	SLC25A21	Mitochondrial 2-oxodicarboxylate carrier	0.00698324	0.0145989	0.416037	-6.098	0.3809	0	0.929078	436916	405929	414524	459308	100	405929
Q15170	TCEAL1	Transcription elongation factor A protein-like 1	0.00139665	0.0146293	0.308453	-6.095	0.5108	0	0.29321	164841	48333	97254	232428	100	48333
Q9HBH5	RDH14	Retinol dehydrogenase 14	0.00418994	0.01468	0.42265	-6.09	0.374	0	0.000215571	463885		463885	100	100	100
Q9H871	RMND5A	E3 ubiquitin-protein transferase RMND5A	0.00139665	0.0147004	0.42265	-6.088	0.374	0	0.000216125	462695		462695	100	100	100
Q9H0F7	ARL6	ADP-ribosylation factor-like protein 6	0	0.0147208	0.375961	-6.086	0.4249	0	0.581263	294491	171177	383470	205512	100	171177
Q9UPT5	EXOC7	Exocyst complex component 7	0.0139665	0.0147412	0.423057	-6.084	0.3736	0	1.005	461939	464251	468645	455234	100	464251
Q96H20	SNF8	Vacuolar-sorting protein SNF8	0.00558659	0.0147924	0.404578	-6.079	0.393	0	0.821861	376816	309691	399815	353818	100	309691
Q6PK18	OGFOD3	2-oxoglutarate and iron-dependent oxygenase domain-containing protein 3	0.0195531	0.0147924	0.387544	-6.079	0.4117	0	0.692431	316725	219310	310071	323379	100	219310
Q7Z392	TRAPPC11	Trafficking protein particle complex subunit 11	0	0.0149056	0.417744	-6.068	0.3791	0	0.919346	434811	399742	528244	341378	100	399742
P55212	CASP6	Caspase-6	0.0027933	0.0149989	0.399207	-6.059	0.3988	0	0.761804	351857	268046	285455	418259	268046	100
O43502	RAD51C	DNA repair protein RAD51 homolog 3	0.00418994	0.0150093	0.356144	-6.058	0.4484	0	0.508827	227508	115762	242823	212193	100	115762
Q9Y5N6	ORC6	Origin recognition complex subunit 6	0.0027933	0.0150928	0.42265	-6.05	0.374	0	0.000227919	438752		100	438752	100	100
Q96NH3	TBC1D32	Protein broad-minded	0	0.0152717	0.446271	-6.033	0.3504	0	1.29886	560098	727492	609672	510524	100	727492
Q5VV42	CDKAL1	Threonylcarbamoyladenosine tRNA methylthiotransferase	0.047486	0.0153566	0.42265	-6.025	0.374	0	0.000236032	423671		423671	100	100	100
Q8IVM0	CCDC50	Coiled-coil domain-containing protein 50	0.0977654	0.0153566	0.42265	-6.025	0.374	0	0.000235847	424004		100	424004	100	100
Q96GW9	MARS2	Methionine--tRNA ligase, mitochondrial	0	0.0156792	0.42265	-5.995	0.374	0	0.000245521	407297		407297	100	100	100
Q8WZA9	IRGQ	Immunity-related GTPase family Q protein	0.0111732	0.0157774	0.42265	-5.986	0.374	0	0.000248616	402227		402227	100	100	100
Q8IUX1	TMEM126B	Complex I assembly factor TMEM126B, mitochondrial	0	0.0158651	0.435598	-5.978	0.3609	0	1.14304	459900	525685	507408	412392	100	525685
O60245	PCDH7	Protocadherin-7	0.00139665	0.01612	0.42265	-5.955	0.374	0	0.000259514	385335		100	385335	100	100
Q16134	ETFDH	Electron transfer flavoprotein-ubiquinone oxidoreductase, mitochondrial	0.00698324	0.0161312	0.465175	-5.954	0.3324	0	1.0297	819478	843821	1.40924e+06	229721	100	843821
Q86XA9	HEATR5A	HEAT repeat-containing protein 5A	0.0586592	0.0161872	0.380133	-5.949	0.4201	0	0.643603	249065	160299	280322	217807	100	160299
Q9Y2X0	MED16	Mediator of RNA polymerase II transcription subunit 16	0.00418994	0.0162209	0.424886	-5.946	0.3717	0	0.989129	397506	393185	490807	304205	100	393185
P11532	DMD	Dystrophin	0.0307263	0.0163791	0.42265	-5.932	0.374	0	0.000268322	372686		372686	100	100	100
P27986	PIK3R1	Phosphatidylinositol 3-kinase regulatory subunit alpha	0.0111732	0.0163905	0.42265	-5.931	0.374	0	0.000268915	371864		100	371864	100	100
Q14155	ARHGEF7	Rho guanine nucleotide exchange factor 7	0.0335196	0.016493	0.401139	-5.922	0.3967	0	0.764434	301642	230586	379345	223940	100	230586
Q8TDY2	RB1CC1	RB1-inducible coiled-coil protein 1	0.0153631	0.0165732	0.413242	-5.915	0.3838	0	0.795018	355888	282937	201508	510267	100	282937
O60927	PPP1R11	E3 ubiquitin-protein ligase PPP1R11	0.00698324	0.0165962	0.42265	-5.913	0.374	0	0.000275155	363431		100	363431	100	100
Q53S08	RAB6D	Ras-related protein Rab-6D	0.0111732	0.0166654	0.437232	-5.907	0.3593	0	1.16459	423304	492977	385305	461304	492977	100
Q9NVC6	MED17	Mediator of RNA polymerase II transcription subunit 17	0.00418994	0.0166885	0.427962	-5.905	0.3686	0	1.04942	381731	400595	341008	422453	100	400595
P23634	ATP2B4	Plasma membrane calcium-transporting ATPase 4	0.0810056	0.0167349	0.42265	-5.901	0.374	0	0.000279783	357420		357420	100	100	100
Q9H2D1	SLC25A32	Mitochondrial folate transporter/carrier	0	0.0167697	0.458342	-5.898	0.3388	0	1.43123	543161	777389	678933	407388	100	777389
Q9BZM5	ULBP2	UL16-binding protein 2	0.00418994	0.0167697	0.443627	-5.898	0.353	0	1.12937	477703	539503	288429	666977	539503	100
Q9ULR0	ISY1	Pre-mRNA-splicing factor ISY1 homolog	0.0796089	0.0168746	0.42265	-5.889	0.374	0	0.000284796	351129		100	351129	100	100
Q9Y320	TMX2	Thioredoxin-related transmembrane protein 2	0	0.016898	0.42265	-5.887	0.374	0	0.000286088	349543		349543	100	100	100
P23443	RPS6KB1	Ribosomal protein S6 kinase beta-1	0.00139665	0.0169215	0.438961	-5.885	0.3576	0	1.1926	416946	497250	398777	435115	100	497250
Q96QU8	XPO6	Exportin-6	0	0.017051	0.439864	-5.874	0.3567	0	1.17095	421906	494030	332084	511727	100	494030
Q8NCN5	PDPR	Pyruvate dehydrogenase phosphatase regulatory subunit, mitochondrial	0.0027933	0.0170865	0.475361	-5.871	0.323	0	1.70998	651217	1.11357e+06	860216	442219	100	1.11357e+06
Q6AI08	HEATR6	HEAT repeat-containing protein 6	0.00698324	0.0171577	0.375273	-5.865	0.4257	0	0.619832	212423	131667	222433	202413	100	131667
Q15118	PDK1	[Pyruvate dehydrogenase (acetyl-transferring)] kinase isozyme 1, mitochondrial	0.0139665	0.0172412	0.411129	-5.858	0.386	0	0.853203	305465	260624	377448	233482	100	260624
Q5TC63	GRTP1	Growth hormone-regulated TBC protein 1	0	0.0174818	0.42265	-5.838	0.374	0	0.000305509	327322		100	327322	100	100
Q9NQE9	HINT3	Adenosine 5'-monophosphoramidase HINT3	0.00837989	0.0175425	0.434953	-5.833	0.3616	0	1.06927	384887	411549	504715	265060	100	411549
Q86U28	ISCA2	Iron-sulfur cluster assembly 2 homolog, mitochondrial	0.0139665	0.0175425	0.403623	-5.833	0.394	0	0.824673	267135	220299	273595	260676	220299	100
Q9NV56	MRGBP	MRG/MORF4L-binding protein	0.0307263	0.0176645	0.428809	-5.823	0.3677	0	1.0677	342117	365278	344224	340010	100	365278
Q8ND76	CCNY	Cyclin-Y	0.00977654	0.0182242	0.42265	-5.778	0.374	0	0.000332398	300844		100	300844	100	100
Q7L099	RUFY3	Protein RUFY3	0.0111732	0.0182748	0.437268	-5.774	0.3593	0	1.16612	350146	408312	331956	368335	100	408312
Q8TAV0	FAM76A	Protein FAM76A	0	0.0183383	0.458606	-5.769	0.3386	0	1.48147	440438	652498	431577	449299	100	652498
Q92889	ERCC4	DNA repair endonuclease XPF	0.0335196	0.018351	0.372777	-5.768	0.4286	0	0.61438	182808	112313	177482	188134	100	112313
Q7Z7H5	TMED4	Transmembrane emp24 domain-containing protein 4	0.0027933	0.0184274	0.450159	-5.762	0.3466	0	1.33518	397639	530919	442642	352637	530919	100
Q9H900	ZWILCH	Protein zwilch homolog	0.0139665	0.0184914	0.384699	-5.757	0.4149	0	0.664036	204582	135850	249855	159308	100	135850
Q96PU5	NEDD4L	E3 ubiquitin-protein ligase NEDD4-like	0.00418994	0.0185299	0.434201	-5.754	0.3623	0	1.12627	329403	370996	307053	351754	100	370996
Q6P9B9	INTS5	Integrator complex subunit 5	0	0.0185556	0.378009	-5.752	0.4225	0	0.644639	187521	120883	190107	184935	100	120883
Q8N584	TTC39C	Tetratricopeptide repeat protein 39C	0	0.0189193	0.419394	-5.724	0.3774	0	0.968032	270082	261448	286641	253522	100	261448
Q8N490	PNKD	Probable hydrolase PNKD	0.0405028	0.0189324	0.397696	-5.723	0.4004	0	0.777094	217974	169386	237843	198104	100	169386
Q5VYS8	TUT7	Terminal uridylyltransferase 7	0.00977654	0.0189981	0.464113	-5.718	0.3334	0	1.56778	436272	683979	459263	413281	100	683979
Q7Z3U7	MON2	Protein MON2 homolog	0.0544693	0.0191038	0.416583	-5.71	0.3803	0	0.941054	257443	242268	261935	252952	100	242268
P49441	INPP1	Inositol polyphosphate 1-phosphatase	0.00139665	0.019117	0.413484	-5.709	0.3835	0	0.863001	257667	222367	332229	183106	100	222367
P52926	HMGA2	High mobility group protein HMGI-C	0.051676	0.0191701	0.41607	-5.705	0.3808	0	0.933532	254415	237504	254683	254147	100	237504
P21953	BCKDHB	2-oxoisovalerate dehydrogenase subunit beta, mitochondrial	0.047486	0.01921	0.42265	-5.702	0.374	0	0.000368827	271130		271130	100	100	100
Q9NZ52	GGA3	ADP-ribosylation factor-binding protein GGA3	0.0265363	0.0192366	0.393248	-5.7	0.4053	0	0.745592	202139	150713	200214	204063	100	150713
Q8NEZ2	VPS37A	Vacuolar protein sorting-associated protein 37A	0	0.01925	0.42265	-5.699	0.374	0	0.000369908	270337		100	270337	100	100
P30038	ALDH4A1	Delta-1-pyrroline-5-carboxylate dehydrogenase, mitochondrial	0.0027933	0.01925	0.448516	-5.699	0.3482	0	1.22053	371885	453898	497713	246056	100	453898
Q13309	SKP2	S-phase kinase-associated protein 2	0.00418994	0.0193034	0.435347	-5.695	0.3612	0	1.12752	308300	347614	350699	265901	100	347614
Q9BRR6	ADPGK	ADP-dependent glucokinase	0.0139665	0.0193436	0.39277	-5.692	0.4059	0	0.745996	198800	148304	206720	190881	100	148304
Q7Z7A3	CTU1	Cytoplasmic tRNA 2-thiolation protein 1	0.00139665	0.0193839	0.444381	-5.689	0.3522	0	1.23149	339168	417681	399429	278908	100	417681
Q6GQQ9	OTUD7B	OTU domain-containing protein 7B	0.0027933	0.0194646	0.344935	-5.683	0.4623	0	0.470807	129447	60944.4	155767	103127	60944.4	100
A2RTX5	TARS3	Threonine--tRNA ligase 2, cytoplasmic	0.0307263	0.0194646	0.444843	-5.683	0.3518	0	1.24409	336506	418643	387572	285439	100	418643
Q7Z2K6	ERMP1	Endoplasmic reticulum metallopeptidase 1	0.00139665	0.0194916	0.431849	-5.681	0.3647	0	1.06504	295167	314363	363710	226624	100	314363
Q86YR5	GPSM1	G-protein-signaling modulator 1	0.00558659	0.0195052	0.425403	-5.68	0.3712	0	1.02477	270952	277663	252514	289389	100	277663
Q8NCG7	DAGLB	Diacylglycerol lipase-beta	0	0.0195322	0.410539	-5.678	0.3866	0	0.828942	241170	199916	315900	166440	100	199916
P13051	UNG	Uracil-DNA glycosylase	0.0125698	0.0195458	0.432821	-5.677	0.3637	0	1.11166	290886	323365	278501	303270	100	323365
Q8N1B4	VPS52	Vacuolar protein sorting-associated protein 52 homolog	0.0167598	0.0196681	0.435039	-5.668	0.3615	0	1.12699	295107	332584	330646	259568	100	332584
Q5VZ89	DENND4C	DENN domain-containing protein 4C	0.099162	0.0196681	0.40566	-5.668	0.3918	0	0.832959	219689	182992	186702	252677	100	182992
P25098	GRK2	Beta-adrenergic receptor kinase 1	0	0.0199012	0.435447	-5.651	0.3611	0	0.872917	336284	293548	533607	138960	100	293548
Q7L5N7	LPCAT2	Lysophosphatidylcholine acyltransferase 2	0.00837989	0.0200953	0.395368	-5.637	0.403	0	0.765192	189630	145103	190375	188885	100	145103
Q86V85	GPR180	Integral membrane protein GPR180	0.00139665	0.0203053	0.443828	-5.622	0.3528	0	1.20437	308518	371570	378745	238290	100	371570
Q8TAK5	GABPB2	GA-binding protein subunit beta-2	0	0.0203758	0.379607	-5.617	0.4207	0	0.656459	159966	105011	142336	177597	100	105011
Q9H3Q1	CDC42EP4	Cdc42 effector protein 4	0.0027933	0.0205033	0.459319	-5.608	0.3379	0	1.19825	398210	477156	186180	610240	100	477156
Q9Y388	RBMX2	RNA-binding motif protein, X-linked 2	0.099162	0.0205745	0.467491	-5.603	0.3302	0	1.6199	382323	619326	380033	384613	100	619326
Q6R327	RICTOR	Rapamycin-insensitive companion of mTOR	0.0125698	0.0206173	0.447496	-5.6	0.3492	0	1.27787	307305	392696	261504	353106	100	392696
O76024	WFS1	Wolframin	0.00139665	0.021109	0.424462	-5.566	0.3722	0	1.00062	231300	231442	270259	192340	100	231442
Q6ZU65	UBN2	Ubinuclein-2	0.0251397	0.0211236	0.42265	-5.565	0.374	0	0.000445573	224430		100	224430	100	100
Q9HD23	MRS2	Magnesium transporter MRS2 homolog, mitochondrial	0.0027933	0.0214185	0.42265	-5.545	0.374	0	0.000458524	218091		218091	100	100	100
Q86VS8	HOOK3	Protein Hook homolog 3	0.0153631	0.0216573	0.430201	-5.529	0.3663	0	1.079	229893	248053	222690	237095	248053	100
Q96DE0	NUDT16	U8 snoRNA-decapping enzyme	0.00698324	0.0217627	0.394182	-5.522	0.4043	0	0.756532	160962	121773	147853	174071	121773	100
Q9NUL7	DDX28	Probable ATP-dependent RNA helicase DDX28	0.023743	0.0218837	0.443133	-5.514	0.3535	0	1.22189	258276	315586	287915	228637	315586	100
Q13751	LAMB3	Laminin subunit beta-3	0.00558659	0.0225927	0.425797	-5.468	0.3708	0	1.02192	203106	207558	181803	224409	207558	100
O75676	RPS6KA4	Ribosomal protein S6 kinase alpha-4	0.0027933	0.022813	0.436189	-5.454	0.3603	0	1.13789	220674	251103	245782	195566	100	251103
Q9NVQ4	FAIM	Fas apoptotic inhibitory molecule 1	0.00837989	0.0229717	0.436074	-5.444	0.3604	0	1.11065	220196	244560	173794	266598	244560	100
Q9NWS8	RMND1	Required for meiotic nuclear division protein 1 homolog	0.00418994	0.0230994	0.437501	-5.436	0.359	0	1.14822	218935	251386	188504	249366	100	251386
Q9P2K8	EIF2AK4	eIF-2-alpha kinase GCN2	0.00418994	0.0238478	0.457177	-5.39	0.3399	0	1.42201	249972	355463	258139	241805	100	355463
Q8NEM2	SHCBP1	SHC SH2 domain-binding protein 1	0.00977654	0.0246717	0.495381	-5.341	0.3051	0	2.13642	360763	770739	299642	421883	100	770739
Q8NFH4	NUP37	Nucleoporin Nup37	0.0391061	0.0248433	0.42265	-5.331	0.374	0	0.000615996	162339		100	162339	100	100
Q9Y6G5	COMMD10	COMM domain-containing protein 10	0.0027933	0.0248605	0.43052	-5.33	0.366	0	1.07234	174971	187628	189824	160117	100	187628
P62487	POLR2G	DNA-directed RNA polymerase II subunit RPB7	0.0405028	0.0252076	0.465087	-5.31	0.3325	0	1.53794	242191	372476	247184	237199	100	372476
Q8N961	ABTB2	Ankyrin repeat and BTB/POZ domain-containing protein 2	0.00837989	0.0255063	0.392825	-5.293	0.4058	0	0.757055	117140	88681.5	125067	109214	100	88681.5
Q5MIZ7	PPP4R3B	Serine/threonine-protein phosphatase 4 regulatory subunit 3B	0.0935754	0.0255417	0.465677	-5.291	0.3319	0	1.51248	240125	363185	283934	196316	100	363185
Q14185	DOCK1	Dedicator of cytokinesis protein 1	0.00977654	0.0265711	0.442044	-5.234	0.3545	0	1.20503	170933	205979	179078	162788	100	205979
P15151	PVR	Poliovirus receptor	0	0.0266633	0.385133	-5.229	0.4144	0	0.707091	101002	71417.6	89715	112289	100	71417.6
Q14CB8	ARHGAP19	Rho GTPase-activating protein 19	0.00139665	0.0270918	0.456963	-5.206	0.3401	0	1.39771	191243	267302	202492	179994	267302	100
Q08426	EHHADH	Peroxisomal bifunctional enzyme	0.00139665	0.0278342	0.448306	-5.167	0.3484	0	1.26016	166741	210120	194730	138752	100	210120
Q8TEB1	DCAF11	DDB1- and CUL4-associated factor 11	0	0.0282227	0.471403	-5.147	0.3266	0	1.62399	203118	329862	205614	200622	100	329862
Q5T5P2	KIAA1217	Sickle tail protein homolog	0.0642458	0.0282815	0.42265	-5.144	0.374	0	0.000801005	124843		100	124843	100	100
Q96BW5	PTER	Phosphotriesterase-related protein	0.0167598	0.0293601	0.546045	-5.09	0.2628	0	3.91077	457395	1788763	491478	423311	100	1788763
Q6UW63	POGLUT2	Protein O-glucosyltransferase 2	0.00977654	0.0308625	0.413682	-5.018	0.3833	0	0.887303	99014.1	87855.5	122466	75562	100	87855.5
Q8IWV7	UBR1	E3 ubiquitin-protein ligase UBR1	0.0027933	0.0354517	0.470618	-4.818	0.3273	0	1.47268	128594	189377	167126	90061.8	100	189377
Q6UWP8	SBSN	Suprabasin	0.0949721	0.0381281	0.564217	-4.713	0.2486	0	3.48962	363151	1.26726e+06	574793	151510	100	1.26726e+06
Q9Y375	NDUFAF1	Complex I intermediate-associated protein 30, mitochondrial	0	0.0980051	0.00242716	-3.351	2.615	0	0.0974941	1.58634e+06	154659	1.75838e+06	1.41431e+06	150360	158958
P06132	UROD	Uroporphyrinogen decarboxylase	0.027933	0.124395	0.0264912	-3.007	1.577	0	0.131752	3.05775e+06	402865	3.11221e+06	3.00329e+06	536520	269210
Q9NPJ6	MED4	Mediator of RNA polymerase II transcription subunit 4	0.0125698	0.139952	0.00279413	-2.837	2.554	0	0.140173	2.85698e+06	400473	2.70223e+06	3.01173e+06	436435	364510
Q9UJX4	ANAPC5	Anaphase-promoting complex subunit 5	0.0307263	0.144787	0.0494692	-2.788	1.306	0	0.154593	711395	109977	835079	587712	67293.2	152660
Q8WVJ2	NUDCD2	NudC domain-containing protein 2	0.0195531	0.175434	0.0225368	-2.511	1.647	0	0.169387	2.29692e+06	389069	2.89448e+06	1.69936e+06	394866	383272
Q8NF37	LPCAT1	Lysophosphatidylcholine acyltransferase 1	0.0600559	0.180116	0.0195412	-2.473	1.709	0	0.175609	1.28087e+06	224932	985356	1.57638e+06	212353	237512
P50542	PEX5	Peroxisomal targeting signal 1 receptor	0.0405028	0.184284	0.153665	-2.44	0.8134	0	0.237855	1.63861e+06	389751	1.73402e+06	1.5432e+06	637366	142135
Q12923	PTPN13	Tyrosine-protein phosphatase non-receptor type 13	0.0851955	0.184923	0.0227946	-2.435	1.642	0	0.191463	2.26678e+08	4.34006e+07	2.28651e+08	2.24705e+08	5.43858e+07	3.24154e+07
Q96M86	DNHD1	Dynein heavy chain domain-containing protein 1	0	0.187375	0.0174821	-2.416	1.757	0	0.188885	7.2678e+06	1.37278e+06	8.26121e+06	6.27439e+06	1.61064e+06	1134915
P38571	LIPA	Lysosomal acid lipase/cholesteryl ester hydrolase	0.00418994	0.195874	0.0942419	-2.352	1.026	0	0.183381	2045248	375059	2.92886e+06	1.16164e+06	273898	476219
P49354	FNTA	Protein farnesyltransferase/geranylgeranyltransferase type-1 subunit alpha	0.0125698	0.1971	0.0362491	-2.343	1.441	0	0.207001	1.98046e+06	409957	2.01451e+06	1.94641e+06	283604	536309
P00414	MT-CO3	Cytochrome c oxidase subunit 3	0.00139665	0.199713	0.11611	-2.324	0.9351	0	0.23047	3.48262e+06	802639	4.0901e+06	2.87514e+06	384506	1.22077e+06
Q7LG56	RRM2B	Ribonucleoside-diphosphate reductase subunit M2 B	0.0139665	0.210516	0.0197168	-2.248	1.705	0	0.205449	739633	151957	900160	579106	147920	155993
Q9BRQ6	CHCHD6	MICOS complex subunit MIC25	0.00139665	0.212569	0.0900633	-2.234	1.045	0	0.238069	1.6592e+06	395003	1.79584e+06	1.52255e+06	215044	574963
Q9H3F6	KCTD10	BTB/POZ domain-containing adapter for CUL3-mediated RhoA degradation protein 3	0.00837989	0.217789	0.100462	-2.199	0.998	0	0.209006	4.17874e+06	873382	2.49911e+06	5.85836e+06	615134	1.13163e+06
Q6IAA8	LAMTOR1	Ragulator complex protein LAMTOR1	0.0223464	0.222211	0.00730322	-2.17	2.136	0	0.219873	1.48811e+07	3.27196e+06	1.30351e+07	1.67272e+07	3.37536e+06	3.16856e+06
O14880	MGST3	Microsomal glutathione S-transferase 3	0.0125698	0.224067	0.00182377	-2.158	2.739	0	0.224184	5.23332e+06	1.17323e+06	5247128	5.21951e+06	1.09737e+06	1.24909e+06
O14735	CDIPT	CDP-diacylglycerol--inositol 3-phosphatidyltransferase	0.0893855	0.225313	0.0261071	-2.15	1.583	0	0.22632	1.10451e+06	249972	1.27972e+06	929295	203998	295946
Q13610	PWP1	Periodic tryptophan protein 1 homolog	0.0893855	0.225625	0.0214185	-2.148	1.669	0	0.223258	1.30372e+07	2.91065e+06	1.05913e+07	1.54831e+07	3.23817e+06	2.58313e+06
Q13586	STIM1	Stromal interaction molecule 1	0.00977654	0.227983	0.014365	-2.133	1.843	0	0.229551	1.62164e+06	372248	1.78716e+06	1.45611e+06	317984	426513
P14406	COX7A2	Cytochrome c oxidase subunit 7A2, mitochondrial	0.0377095	0.228141	0.0355871	-2.132	1.449	0	0.237262	1.60151e+07	3.79978e+06	1.6046e+07	15984246	2.74315e+06	4.85641e+06
Q8NE86	MCU	Calcium uniporter protein, mitochondrial	0.00139665	0.2283	0.0696653	-2.131	1.157	0	0.247293	838422	207336	874730	802113	126506	288166
Q7Z4H8	POGLUT3	Protein O-glucosyltransferase 3	0.0363128	0.229728	0.0900199	-2.122	1.046	0	0.238532	1.01226e+06	241457	1.27972e+06	744798	331304	151610
P00403	MT-CO2	Cytochrome c oxidase subunit 2	0.0879888	0.234393	0.056748	-2.093	1.246	0	0.244281	4.84682e+07	1.18399e+07	5.57849e+07	4.11516e+07	8.09985e+06	1.55799e+07
Q5T1M5	FKBP15	FK506-binding protein 15	0.0642458	0.236023	0.0108167	-2.083	1.966	0	0.233952	886202	207328	1.01874e+06	753659	209493	205164
Q68E01	INTS3	Integrator complex subunit 3	0.0405028	0.242659	0.147413	-2.043	0.8315	0	0.287598	1.11323e+06	320163	1.04468e+06	1.18178e+06	494729	145597
O95486	SEC24A	Protein transport protein Sec24A	0.051676	0.24367	0.160467	-2.037	0.7946	0	0.239967	2.22091e+06	532946	3.19871e+06	1.24311e+06	312932	752960
Q7Z5L9	IRF2BP2	Interferon regulatory factor 2-binding protein 2	0.0712291	0.249481	0.185414	-2.003	0.7319	0	0.313237	2.35562e+06	737869	2.44277e+06	2.26847e+06	292294	1.18344e+06
Q9UFN0	NIPSNAP3A	Protein NipSnap homolog 3A	0.0027933	0.249654	0.03297	-2.002	1.482	0	0.256691	1.19293e+06	306213	1.14314e+06	1.24271e+06	382509	229917
P36954	POLR2I	DNA-directed RNA polymerase II subunit RPB9	0.0558659	0.251739	0.0101979	-1.99	1.991	0	0.253908	1.46607e+06	372246	1.51788e+06	1.41426e+06	322345	422148
Q7L8L6	FASTKD5	FAST kinase domain-containing protein 5, mitochondrial	0.0195531	0.25349	0.228002	-1.98	0.6421	0	0.260802	2.9125e+06	759588	4.3438e+06	1.48121e+06	355610	1.16356e+06
Q8N108	MIER1	Mesoderm induction early response protein 1	0.0125698	0.258996	0.180543	-1.949	0.7434	0	0.291884	647364	188955	841289	453438	88411.7	289499
Q9UHA4	LAMTOR3	Ragulator complex protein LAMTOR3	0.00698324	0.262611	0.0150375	-1.929	1.823	0	0.259271	6.30315e+06	1.63422e+06	5288681	7.31763e+06	1.58099e+06	1.68745e+06
O00469	PLOD2	Procollagen-lysine,2-oxoglutarate 5-dioxygenase 2	0.0432961	0.263523	0.00578228	-1.924	2.238	0	0.262372	745575	195618	819889	671260	199264	191972
Q6GYQ0	RALGAPA1	Ral GTPase-activating protein subunit alpha-1	0.0153631	0.263706	0.0779683	-1.923	1.108	0	0.281768	878017	247397	963888	792146	157228	337566
Q9UNI6	DUSP12	Dual specificity protein phosphatase 12	0.00139665	0.26906	0.328644	-1.894	0.4833	0	0.411607	1.2863e+06	529450	1.5148e+06	1.0578e+06	124414	934486
Q00765	REEP5	Receptor expression-enhancing protein 5	0.0335196	0.273384	0.201688	-1.871	0.6953	0	0.338953	2.53445e+06	859058	2324792	2.7441e+06	346799	1.37132e+06
Q86SQ0	PHLDB2	Pleckstrin homology-like domain family B member 2	0.00698324	0.273953	0.152858	-1.868	0.8157	0	0.236083	1.79467e+07	4.2369e+06	8.74516e+06	2.71482e+07	4.66602e+06	3.80778e+06
Q8N806	UBR7	Putative E3 ubiquitin-protein ligase UBR7	0.00837989	0.274523	0.152161	-1.865	0.8177	0	0.237755	2.32184e+06	552029	3.50558e+06	1.1381e+06	609338	494721
P07686	HEXB	Beta-hexosaminidase subunit beta	0.0488827	0.274904	0.102215	-1.863	0.9905	0	0.29176	4.92049e+06	1.4356e+06	5.88893e+06	3.95204e+06	1.9836e+06	887601
Q9NRW7	VPS45	Vacuolar protein sorting-associated protein 45	0.0027933	0.277008	0.152923	-1.852	0.8155	0	0.299247	1.83994e+06	550596	2.35349e+06	1.32639e+06	299254	801938
Q9BXW9	FANCD2	Fanconi anemia group D2 protein	0.0558659	0.28185	0.00884401	-1.827	2.053	0	0.281934	731541	206247	664983	798100	190003	222490
Q15043	SLC39A14	Metal cation symporter ZIP14	0.0125698	0.283417	0.0101747	-1.819	1.992	0	0.283266	2.09866e+06	594480	2.27305e+06	1.92428e+06	536665	652294
Q9UMX5	NENF	Neudesin	0.0377095	0.287972	0.0583149	-1.796	1.234	0	0.301958	4.28364e+06	1.29348e+06	4.25502e+06	4.31226e+06	1.68618e+06	900783
Q8IUI8	CRLF3	Cytokine receptor-like factor 3	0.00837989	0.288172	0.136031	-1.795	0.8664	0	0.280471	1.75731e+06	492873	2.42215e+06	1.09246e+06	646494	339252
Q8NFQ8	TOR1AIP2	Torsin-1A-interacting protein 2	0.0432961	0.289774	0.00948218	-1.787	2.023	0	0.290204	2.77714e+06	805938	3016404	2.53788e+06	737471	874406
O75695	RP2	Protein XRP2	0.0139665	0.297096	0.0588835	-1.751	1.23	0	0.309105	2.68033e+06	828504	2.41487e+06	2.9458e+06	1064795	592214
Q9NZ32	ACTR10	Actin-related protein 10	0.0223464	0.297096	0.269012	-1.751	0.5702	0	0.343224	1.43579e+06	492799	1.98236e+06	889218	196840	788757
Q9UKG1	APPL1	DCC-interacting protein 13-alpha	0.00977654	0.299785	0.188685	-1.738	0.7243	0	0.294169	1.95339e+06	574627	2.78462e+06	1.12215e+06	799261	349993
Q9NXR1	NDE1	Nuclear distribution protein nudE homolog 1	0.0209497	0.302289	0.00309512	-1.726	2.509	0	0.302295	250033	75583.6	237125	262941	72442	78725.2
P56181	NDUFV3	NADH dehydrogenase [ubiquinone] flavoprotein 3, mitochondrial	0.0251397	0.303338	0.0812048	-1.721	1.09	0	0.32082	1.24328e+06	398869	1.33223e+06	1.15433e+06	262990	534749
Q86VN1	VPS36	Vacuolar protein-sorting-associated protein 36	0	0.305025	0.262368	-1.713	0.5811	0	0.321634	2.34311e+06	753623	3.40097e+06	1.28524e+06	352046	1.1552e+06
P83111	LACTB	Serine beta-lactamase-like protein LACTB, mitochondrial	0.0139665	0.307786	0.11293	-1.7	0.9472	0	0.33338	3.06835e+07	1.02293e+07	33845834	2.75212e+07	1.43017e+07	6.15689e+06
P11166	SLC2A1	Solute carrier family 2, facilitated glucose transporter member 1	0.0558659	0.308855	0.127789	-1.695	0.8935	0	0.336656	724004	243740	826327	621680	142223	345258
Q9Y3I1	FBXO7	F-box only protein 7	0.00558659	0.310572	0.373237	-1.687	0.428	0	0.486704	2.69048e+06	1.30947e+06	2.90598e+06	2.47498e+06	299425	2.31951e+06
Q96QD8	SLC38A2	Sodium-coupled neutral amino acid symporter 2	0.047486	0.312949	0.0221476	-1.676	1.655	0	0.318275	2.76729e+06	880760	2.70172e+06	2.83286e+06	726880	1.03464e+06
Q99808	SLC29A1	Equilibrative nucleoside transporter 1	0.0265363	0.313383	0.290727	-1.674	0.5365	0	0.415743	1.9233e+06	799599	2.19213e+06	1.65447e+06	266894	1.3323e+06
P50148	GNAQ	Guanine nucleotide-binding protein G(q) subunit alpha	0.0335196	0.313383	0.135661	-1.674	0.8675	0	0.348849	2.02545e+06	706576	2.10728e+06	1.94362e+06	1.01873e+06	394417
Q14156	EFR3A	Protein EFR3 homolog A	0.0335196	0.314253	0.18249	-1.67	0.7388	0	0.294312	1.12205e+06	330233	617188	1.62691e+06	429856	230610
Q9NVA1	UQCC1	Ubiquinol-cytochrome-c reductase complex assembly factor 1	0.00837989	0.315782	0.222995	-1.663	0.6517	0	0.380387	2.4129e+06	917837	2.74772e+06	2.07808e+06	395512	1.44016e+06
P00374	DHFR	Dihydrofolate reductase	0.0614525	0.318419	0.0255765	-1.651	1.592	0	0.315639	1.68404e+07	5.31548e+06	1.96056e+07	1.40752e+07	5.77621e+06	4.85474e+06
Q8WZA0	LZIC	Protein LZIC	0.0209497	0.319968	0.06957	-1.644	1.158	0	0.336869	4.07092e+06	1.37137e+06	4.14608e+06	3.99575e+06	1.79295e+06	949780
Q96G23	CERS2	Ceramide synthase 2	0.0363128	0.320412	0.211447	-1.642	0.6748	0	0.271536	3.50083e+06	950601	5.39685e+06	1.6048e+06	1.09541e+06	805791
P21283	ATP6V1C1	V-type proton ATPase subunit C 1	0.00977654	0.321302	0.105576	-1.638	0.9764	0	0.300817	4.64283e+06	1.39664e+06	6.36044e+06	2.92522e+06	1.53859e+06	1.2547e+06
Q9H2P9	DPH5	Diphthine methyl ester synthase	0.0181564	0.32197	0.094656	-1.635	1.024	0	0.306365	3.19985e+06	980323	4.27374e+06	2.12596e+06	842452	1.11819e+06
P60604	UBE2G2	Ubiquitin-conjugating enzyme E2 G2	0.0251397	0.322417	0.0172953	-1.633	1.762	0	0.319239	1.80384e+06	575855	2.06555e+06	1.54213e+06	592524	559185
Q8N0U8	VKORC1L1	Vitamin K epoxide reductase complex subunit 1-like protein 1	0.00139665	0.32828	0.166605	-1.607	0.7783	0	0.289285	1.77439e+06	513304	930317	2.61846e+06	478106	548502
Q9UFG5	C19orf25	UPF0449 protein C19orf25	0.00837989	0.329648	0.0491191	-1.601	1.309	0	0.336303	1.20685e+06	405867	1.08177e+06	1.33192e+06	312846	498889
P18858	LIG1	DNA ligase 1	0.0572626	0.330106	0.0728493	-1.599	1.138	0	0.322107	3.06344e+06	986754	3.89625e+06	2.23062e+06	839127	1134382
Q5T440	IBA57	Putative transferase CAF17, mitochondrial	0.0642458	0.331481	0.0119224	-1.593	1.924	0	0.32969	1.55805e+06	513673	1.38107e+06	1.73502e+06	532687	494658
O75955	FLOT1	Flotillin-1	0.0628492	0.333556	0.203787	-1.584	0.6908	0	0.365564	1.60196e+07	5.85619e+06	1.17058e+07	2.03334e+07	8.65856e+06	3.05381e+06
Q14254	FLOT2	Flotillin-2	0.0614525	0.334714	0.139018	-1.579	0.8569	0	0.349345	1.58048e+07	5.52133e+06	1.2021e+07	19588570	7.55339e+06	3.48927e+06
Q8IXQ5	KLHL7	Kelch-like protein 7	0.00139665	0.335411	0.22809	-1.576	0.6419	0	0.280562	665434	186696	295392	1.03548e+06	170497	202895
Q8TF05	PPP4R1	Serine/threonine-protein phosphatase 4 regulatory subunit 1	0.0111732	0.335876	0.0408222	-1.574	1.389	0	0.343352	1.44767e+06	497059	1.51217e+06	1.38317e+06	388444	605675
Q6UVJ0	SASS6	Spindle assembly abnormal protein 6 homolog	0	0.337509	0.160908	-1.567	0.7934	0	0.378659	923191	349575	988715	857667	190156	508993
P28331	NDUFS1	NADH-ubiquinone oxidoreductase 75 kDa subunit, mitochondrial	0.075419	0.337978	0.0968987	-1.565	1.014	0	0.348736	3.66768e+07	1.27905e+07	4.33639e+07	2.99896e+07	8.89986e+06	1.66812e+07
Q96TA1	NIBAN2	Protein Niban 2	0.0656425	0.340565	0.177031	-1.554	0.752	0	0.327612	649036	212632	907176	390897	147702	277562
P82664	MRPS10	28S ribosomal protein S10, mitochondrial	0.0321229	0.341747	0.266353	-1.549	0.5745	0	0.377646	990969	374236	639496	1.34244e+06	173864	574608
Q9NY33	DPP3	Dipeptidyl peptidase 3	0.0335196	0.341747	0.223873	-1.549	0.65	0	0.306998	1.44989e+07	4.45114e+06	2.17782e+07	7.21962e+06	3.26057e+06	5.64171e+06
Q9UJY5	GGA1	ADP-ribosylation factor-binding protein GGA1	0.00139665	0.341984	0.131285	-1.548	0.8818	0	0.368878	1.53206e+06	565142	1738435	1.32568e+06	345200	785084
Q96C23	GALM	Galactose mutarotase	0	0.342221	0.219307	-1.547	0.6589	0	0.369994	1.67303e+06	619011	2.18284e+06	1.16322e+06	914069	323954
Q9NXG2	THUMPD1	THUMP domain-containing protein 1	0.0195531	0.345079	0.041881	-1.535	1.378	0	0.337213	3.85237e+06	1.29907e+06	4.68782e+06	3.01693e+06	1.35621e+06	1.24193e+06
Q9H488	POFUT1	GDP-fucose protein O-fucosyltransferase 1	0.0139665	0.34917	0.285634	-1.518	0.5442	0	0.380973	4.39536e+06	1.67452e+06	6.11885e+06	2.67188e+06	775331	2.5737e+06
Q15274	QPRT	Nicotinate-nucleotide pyrophosphorylase [carboxylating]	0	0.350139	0.350815	-1.514	0.4549	0	0.490405	1.82687e+06	895904	1.92374e+06	1.72999e+06	1.52351e+06	268299
O95167	NDUFA3	NADH dehydrogenase [ubiquinone] 1 alpha subcomplex subunit 3	0	0.353553	0.256816	-1.5	0.5904	0	0.433287	1.77512e+06	769135	1.89469e+06	1.65555e+06	323963	1.21431e+06
O43504	LAMTOR5	Ragulator complex protein LAMTOR5	0.0209497	0.354535	0.00197651	-1.496	2.704	0	0.35422	5.42066e+06	1.92011e+06	5174881	5.66643e+06	1.92024e+06	1.91997e+06
P14854	COX6B1	Cytochrome c oxidase subunit 6B1	0.0614525	0.357001	0.0300768	-1.486	1.522	0	0.36022	4.85737e+06	1.74972e+06	4441879	5.27286e+06	2.02507e+06	1.47437e+06
Q9BQ95	ECSIT	Evolutionarily conserved signaling intermediate in Toll pathway, mitochondrial	0.00418994	0.358986	0.128949	-1.478	0.8896	0	0.389804	1.58639e+06	618381	1.6571e+06	1.51567e+06	380337	856424
Q9Y276	BCS1L	Mitochondrial chaperone BCS1	0.0195531	0.359983	0.170035	-1.474	0.7695	0	0.352021	5.86984e+06	2.06631e+06	7.97821e+06	3.76147e+06	1.448e+06	2.68462e+06
P53634	CTSC	Dipeptidyl peptidase 1	0.0209497	0.360482	0.309516	-1.472	0.5093	0	0.465417	1.38108e+06	642780	1.50414e+06	1.25803e+06	233634	1.05193e+06
P19404	NDUFV2	NADH dehydrogenase [ubiquinone] flavoprotein 2, mitochondrial	0.0181564	0.361233	0.00893492	-1.469	2.049	0	0.359514	4.05635e+06	1.45831e+06	3.70047e+06	4.41223e+06	1.40152e+06	1.51511e+06
O95613	PCNT	Pericentrin	0.0488827	0.362487	0.319831	-1.464	0.4951	0	0.47149	1.01553e+06	478814	909008	1.12206e+06	170395	787233
Q9NUQ9	CYRIB	CYFIP-related Rac1 interactor B	0.0125698	0.364755	0.140785	-1.455	0.8514	0	0.395365	5.83347e+06	2.30635e+06	6.35898e+06	5.30796e+06	3.21323e+06	1.39946e+06
Q9Y3D0	CIAO2B	Cytosolic iron-sulfur assembly component 2B	0.0432961	0.365261	0.288932	-1.453	0.5392	0	0.459423	4.02709e+06	1.85014e+06	4.14185e+06	3.91234e+06	726895	2.97339e+06
P52788	SMS	Spermine synthase	0.0293296	0.366783	0.221236	-1.447	0.6551	0	0.314064	5.54182e+06	1.74049e+06	8.40241e+06	2.68124e+06	1.77198e+06	1.709e+06
Q63HN8	RNF213	E3 ubiquitin-protein ligase RNF213	0.0321229	0.367292	0.152404	-1.445	0.817	0	0.403699	1.11468e+06	449994	1.14608e+06	1.08327e+06	636969	263019
O43293	DAPK3	Death-associated protein kinase 3	0.00418994	0.368823	0.0263898	-1.439	1.579	0	0.374391	1.00811e+06	377426	1.04647e+06	969742	437411	317440
Q9UHQ9	CYB5R1	NADH-cytochrome b5 reductase 1	0.00139665	0.373453	0.297614	-1.421	0.5263	0	0.388001	1.26953e+06	492579	1.80999e+06	729072	249577	735582
Q13617	CUL2	Cullin-2	0.0488827	0.376573	0.124358	-1.409	0.9053	0	0.37407	7.39681e+06	2.76693e+06	9.41562e+06	5.37799e+06	2.06696e+06	3.4669e+06
Q6PJG6	BRAT1	BRCA1-associated ATM activator 1	0.00558659	0.378929	0.436895	-1.4	0.3596	0	0.58724	1.35292e+06	794489	1.33255e+06	1.37329e+06	187215	1.40176e+06
Q6IAN0	DHRS7B	Dehydrogenase/reductase SDR family member 7B	0.0363128	0.378929	0.267456	-1.4	0.5727	0	0.456553	762751	348236	712882	812620	152641	543831
Q6NVY1	HIBCH	3-hydroxyisobutyryl-CoA hydrolase, mitochondrial	0.0377095	0.380245	0.269739	-1.395	0.5691	0	0.437989	3.30615e+06	1.44806e+06	2.55454e+06	4.05777e+06	2.22215e+06	673973
Q4G176	ACSF3	Malonate--CoA ligase ACSF3, mitochondrial	0.00558659	0.381036	0.421726	-1.392	0.375	0	0.394995	1.48876e+06	588050	2.3399e+06	637612	228688	947413
P10109	FDX1	Adrenodoxin, mitochondrial	0.0139665	0.381036	0.439182	-1.392	0.3574	0	0.590124	1.39302e+06	822053	1.30539e+06	1.48064e+06	1.44968e+06	194423
Q86X10	RALGAPB	Ral GTPase-activating protein subunit beta	0.0167598	0.382359	0.520014	-1.387	0.284	0	0.708041	1.10873e+06	785030	1.23356e+06	983907	122063	1.448e+06
P68402	PAFAH1B2	Platelet-activating factor acetylhydrolase IB subunit alpha2	0.0530726	0.383953	0.0730326	-1.381	1.136	0	0.377791	7.31024e+06	2.76174e+06	8.98976e+06	5.63072e+06	3.15329e+06	2.37019e+06
Q8IXI1	RHOT2	Mitochondrial Rho GTPase 2	0.0377095	0.384219	0.330494	-1.38	0.4808	0	0.497278	3.6043e+06	1.79234e+06	3.72009e+06	3.48851e+06	654100	2.93058e+06
Q99538	LGMN	Legumain	0.0181564	0.385553	0.28715	-1.375	0.5419	0	0.469104	1.4344e+06	672882	1.28881e+06	1.57998e+06	285832	1.05993e+06
Q9Y3A6	TMED5	Transmembrane emp24 domain-containing protein 5	0.00837989	0.387428	0.240981	-1.368	0.618	0	0.442685	1.81285e+06	802522	2.08623e+06	1.53947e+06	1.2059e+06	399139
Q9ULK4	MED23	Mediator of RNA polymerase II transcription subunit 23	0.0125698	0.388234	0.271569	-1.365	0.5661	0	0.464643	1.41934e+06	659488	1.50172e+06	1.33696e+06	293779	1.0252e+06
P34949	MPI	Mannose-6-phosphate isomerase	0.0251397	0.389043	0.00666835	-1.362	2.176	0	0.387784	1.01237e+07	3.92579e+06	9.33788e+06	1.09094e+07	3.95426e+06	3.89732e+06
Q9BUT1	BDH2	Dehydrogenase/reductase SDR family member 6	0.0027933	0.389582	0.0419576	-1.36	1.377	0	0.392869	1.8398e+06	722803	1.6362e+06	2.0434e+06	842193	603413
Q9BTZ2	DHRS4	Dehydrogenase/reductase SDR family member 4	0.023743	0.392292	0.306532	-1.35	0.5135	0	0.328699	1.11239e+06	365643	473539	1.75125e+06	442989	288297
Q96P48	ARAP1	Arf-GAP with Rho-GAP domain, ANK repeat and PH domain-containing protein 1	0.00837989	0.393654	0.386816	-1.345	0.4125	0	0.50322	965709	485964	1.24155e+06	689869	164002	807927
P03891	MT-ND2	NADH-ubiquinone oxidoreductase chain 2	0	0.395569	0.106251	-1.338	0.9737	0	0.401063	1.50565e+06	603860	1.79813e+06	1.21317e+06	448798	758922
Q99797	MIPEP	Mitochondrial intermediate peptidase	0.00558659	0.398044	0.429733	-1.329	0.3668	0	0.531524	3.98671e+06	2.11903e+06	5.277e+06	2.69643e+06	625807	3.61226e+06
Q9Y2Q5	LAMTOR2	Ragulator complex protein LAMTOR2	0	0.399703	0.0351174	-1.323	1.454	0	0.397416	3.80336e+06	1.51152e+06	3.25431e+06	4.35241e+06	1.66058e+06	1.36245e+06
P21399	ACO1	Cytoplasmic aconitate hydratase	0.0181564	0.39998	0.124679	-1.322	0.9042	0	0.387307	1.45695e+07	5.64288e+06	1.89344e+07	1.02046e+07	4.62771e+06	6.65805e+06
Q9BPW8	NIPSNAP1	Protein NipSnap homolog 1	0.0558659	0.401091	0.200762	-1.318	0.6973	0	0.393561	5.67292e+06	2.23264e+06	7.67239e+06	3673452	1.54729e+06	2.91799e+06
O94813	SLIT2	Slit homolog 2 protein	0.00418994	0.401925	0.0202346	-1.315	1.694	0	0.399228	726574	290068	816470	636678	303261	276876
Q9Y6M4	CSNK1G3	Casein kinase I isoform gamma-3	0.00418994	0.40416	0.375805	-1.307	0.425	0	0.42188	4.12164e+06	1.73884e+06	2.13612e+06	6.10716e+06	2.68039e+06	797280
Q9Y223	GNE	Bifunctional UDP-N-acetylglucosamine 2-epimerase/N-acetylmannosamine kinase	0	0.404441	0.558631	-1.306	0.2529	0	0.795485	762306	606403	719734	804878	83943.5	1.12886e+06
Q9UHJ6	SHPK	Sedoheptulokinase	0.00418994	0.404721	0.120483	-1.305	0.9191	0	0.412662	1291525	532964	1.54419e+06	1.03886e+06	384657	681270
P43003	SLC1A3	Excitatory amino acid transporter 1	0.0223464	0.406126	0.222611	-1.3	0.6525	0	0.46005	1.22195e+06	562160	1.25154e+06	1.19237e+06	295711	828608
Q53T59	HS1BP3	HCLS1-binding protein 3	0.00418994	0.408384	0.311847	-1.292	0.5061	0	0.497174	1.60308e+06	797011	1.45278e+06	1.75338e+06	335958	1.25806e+06
P50897	PPT1	Palmitoyl-protein thioesterase 1	0.0139665	0.408384	0.328256	-1.292	0.4838	0	0.511407	1.6184e+06	827661	1.62103e+06	1.61577e+06	1.32663e+06	328694
P50552	VASP	Vasodilator-stimulated phosphoprotein	0.0335196	0.408668	0.0865194	-1.291	1.063	0	0.398356	866315	345102	1.08217e+06	650465	303171	387033
O75884	RBBP9	Serine hydrolase RBBP9	0.0139665	0.411225	0.249974	-1.282	0.6021	0	0.415681	669434	278271	909887	428982	170768	385774
Q9BXV9	GON7	EKC/KEOPS complex subunit GON7	0.0125698	0.412653	0.187142	-1.277	0.7278	0	0.406801	1.23882e+06	503952	1.64516e+06	832477	362334	645571
P03905	MT-ND4	NADH-ubiquinone oxidoreductase chain 4	0.00139665	0.413225	0.340812	-1.275	0.4675	0	0.329691	898124	296103	1.44409e+06	352156	264081	328126
Q86Y39	NDUFA11	NADH dehydrogenase [ubiquinone] 1 alpha subcomplex subunit 11	0.00139665	0.414085	0.112948	-1.272	0.9471	0	0.437239	3.44053e+06	1.50434e+06	3.39654e+06	3.48452e+06	1.03406e+06	1.97461e+06
Q15435	PPP1R7	Protein phosphatase 1 regulatory subunit 7	0.0460894	0.414947	0.207378	-1.269	0.6832	0	0.401788	1.9277e+07	7.74525e+06	2.63642e+07	1.21897e+07	5609454	9.88106e+06
Q99627	COPS8	COP9 signalosome complex subunit 8	0.0726257	0.414947	0.0648475	-1.269	1.188	0	0.411285	6.78484e+06	2.7905e+06	8.07026e+06	5.49942e+06	3174872	2.40613e+06
O95340	PAPSS2	Bifunctional 3'-phosphoadenosine 5'-phosphosulfate synthase 2	0.00558659	0.415235	0.13602	-1.268	0.8664	0	0.395632	1.42837e+06	565110	1.89644e+06	960302	497065	633154
Q8WU79	SMAP2	Stromal membrane-associated protein 2	0.0446927	0.416966	0.227223	-1.262	0.6435	0	0.472162	1.95319e+06	922225	1.85601e+06	2.05038e+06	491389	1.35306e+06
P10606	COX5B	Cytochrome c oxidase subunit 5B, mitochondrial	0.0796089	0.418413	0.00805835	-1.257	2.094	0	0.419701	2.48375e+07	1.04243e+07	2.38162e+07	2.58587e+07	1.11256e+07	9.72297e+06
P35270	SPR	Sepiapterin reductase	0.0139665	0.419575	0.227741	-1.253	0.6426	0	0.469656	289864	136136	257909	321818	198376	73896.8
Q9UPY5	SLC7A11	Cystine/glutamate transporter	0.00418994	0.420448	0.0123978	-1.25	1.907	0	0.422032	381645	161066	370848	392442	146301	175832
Q8NFF5	FLAD1	FAD synthase	0.0181564	0.42074	0.0821285	-1.249	1.086	0	0.434765	1.40139e+06	609276	1.3793e+06	1.42348e+06	451744	766807
Q99638	RAD9A	Cell cycle checkpoint control protein RAD9A	0	0.421323	0.060764	-1.247	1.216	0	0.429604	490944	210912	455553	526334	166738	255085
Q15833	STXBP2	Syntaxin-binding protein 2	0.0027933	0.421616	0.368634	-1.246	0.4334	0	0.464545	1.56577e+06	727371	2.18541e+06	946132	325516	1.12923e+06
Q9NUJ1	ABHD10	Palmitoyl-protein thioesterase ABHD10, mitochondrial	0.0223464	0.421616	0.116414	-1.246	0.934	0	0.433617	4.14975e+06	1.7994e+06	3.51797e+06	4.78153e+06	1.2972e+06	2.30161e+06
P23786	CPT2	Carnitine O-palmitoyltransferase 2, mitochondrial	0.0139665	0.421908	0.261872	-1.245	0.5819	0	0.389021	1.23538e+07	4.80587e+06	1.79755e+07	6.73202e+06	3.56753e+06	6.0442e+06
Q9NWY4	HPF1	Histone PARylation factor 1	0.00977654	0.422493	0.132674	-1.243	0.8772	0	0.398639	3.28515e+06	1.30959e+06	4.38321e+06	2.18708e+06	1.36882e+06	1.25035e+06
Q96RQ1	ERGIC2	Endoplasmic reticulum-Golgi intermediate compartment protein 2	0.00139665	0.424254	0.183301	-1.237	0.7368	0	0.465156	1.22565e+06	570118	1.25615e+06	1.19514e+06	340016	800221
P16930	FAH	Fumarylacetoacetase	0.0111732	0.424548	0.276576	-1.236	0.5582	0	0.49531	1.5744e+06	779815	1.44238e+06	1.70642e+06	1.1832e+06	376433
P35610	SOAT1	Sterol O-acyltransferase 1	0.00698324	0.425137	0.120503	-1.234	0.919	0	0.43234	1.80708e+06	781272	2.14186e+06	1.4723e+06	576652	985892
Q8N357	SLC35F6	Solute carrier family 35 member F6	0.0111732	0.425137	0.429507	-1.234	0.367	0	0.572396	991266	567396	1.20137e+06	781165	177382	957410
Q5VW32	BROX	BRO1 domain-containing protein BROX	0.0111732	0.426909	0.0436293	-1.228	1.36	0	0.421284	2.07254e+06	873126	2.43811e+06	1.70696e+06	831778	914475
Q08722	CD47	Leukocyte surface antigen CD47	0	0.427205	0.0404152	-1.227	1.393	0	0.433141	2.71003e+06	1.17382e+06	2.6689e+06	2.75115e+06	971278	1.37637e+06
P16219	ACADS	Short-chain specific acyl-CoA dehydrogenase, mitochondrial	0.00139665	0.427205	0.280855	-1.227	0.5515	0	0.379059	973273	368928	1.45623e+06	490314	296481	441376
Q9BVG4	PBDC1	Protein PBDC1	0.0418994	0.428094	0.062007	-1.224	1.208	0	0.440257	1.01733e+07	4.47887e+06	1.00784e+07	1.02682e+07	3.50351e+06	5.45422e+06
O60244	MED14	Mediator of RNA polymerase II transcription subunit 14	0.00977654	0.428985	0.400239	-1.221	0.3977	0	0.568539	859161	488467	938087	780236	165947	810987
Q14181	POLA2	DNA polymerase alpha subunit B	0.0796089	0.429283	0.174968	-1.22	0.757	0	0.465299	5.26065e+06	2.44778e+06	5.18372e+06	5.33758e+06	1.4969e+06	3.39865e+06
P46736	BRCC3	Lys-63-specific deubiquitinase BRCC36	0.023743	0.430176	0.124206	-1.217	0.9059	0	0.41311	1.55734e+06	643352	2.02627e+06	1.08841e+06	574954	711751
Q9Y312	AAR2	Protein AAR2 homolog	0.0698324	0.430475	0.0483486	-1.216	1.316	0	0.430418	2.31349e+06	995767	2.62327e+06	2.0037e+06	858879	1.13265e+06
P78539	SRPX	Sushi repeat-containing protein SRPX	0	0.431072	0.130174	-1.214	0.8855	0	0.408877	2.29896e+06	939993	3.04031e+06	1.55762e+06	987688	892298
Q6ZXV5	TMTC3	Protein O-mannosyl-transferase TMTC3	0.0027933	0.43167	0.462419	-1.212	0.335	0	0.626803	787562	493647	871372	703752	133995	853298
P49590	HARS2	Histidine--tRNA ligase, mitochondrial	0.0726257	0.431969	0.281833	-1.211	0.55	0	0.504814	1.48715e+06	750734	1.50166e+06	1.47264e+06	360926	1.14054e+06
P0CG08	GPR89B	Golgi pH regulator B	0.0139665	0.432269	0.0744424	-1.21	1.128	0	0.444894	925544	411769	927143	923946	313554	509984
O43181	NDUFS4	NADH dehydrogenase [ubiquinone] iron-sulfur protein 4, mitochondrial	0.0209497	0.432269	0.059556	-1.21	1.225	0	0.437503	3.66832e+06	1.6049e+06	4.06085e+06	3.27578e+06	1.3094e+06	1.9004e+06
Q99757	TXN2	Thioredoxin, mitochondrial	0.00837989	0.433769	0.173647	-1.205	0.7603	0	0.464842	2.1676e+06	1.00759e+06	1937283	2.39791e+06	1.38006e+06	635118
Q02818	NUCB1	Nucleobindin-1	0.0600559	0.43407	0.148496	-1.204	0.8283	0	0.411469	905598	372626	606250	1.20495e+06	418593	326658
Q10713	PMPCA	Mitochondrial-processing peptidase subunit alpha	0.0879888	0.434672	0.331974	-1.202	0.4789	0	0.410305	9.41642e+06	3.8636e+06	1.39607e+07	4872153	2.43012e+06	5.29709e+06
P07099	EPHX1	Epoxide hydrolase 1	0.0181564	0.434974	0.303072	-1.201	0.5185	0	0.401483	5.30068e+06	2.12813e+06	7823946	2.77741e+06	1.47541e+06	2.78085e+06
Q15075	EEA1	Early endosome antigen 1	0.0530726	0.435879	0.183357	-1.198	0.7367	0	0.474424	1.12322e+06	532882	1.10097e+06	1.14547e+06	324091	741674
P05556	ITGB1	Integrin beta-1	0.0530726	0.436181	0.288409	-1.197	0.54	0	0.502238	3.06567e+06	1.5397e+06	2.62858e+06	3.50277e+06	2.3244e+06	754997
P36871	PGM1	Phosphoglucomutase-1	0.0921788	0.436181	0.149963	-1.197	0.824	0	0.410561	5.41997e+07	2.22523e+07	7.27714e+07	3.56279e+07	2.36901e+07	2.08144e+07
P49585	PCYT1A	Choline-phosphate cytidylyltransferase A	0.0824022	0.436484	0.00233342	-1.196	2.632	0	0.43634	960245	418993	998978	921512	419335	418652
Q13630	GFUS	GDP-L-fucose synthase	0.00837989	0.436786	0.0278581	-1.195	1.555	0	0.43453	2.02327e+06	879172	2.27724e+06	1.7693e+06	824420	933925
Q4KWH8	PLCH1	1-phosphatidylinositol 4,5-bisphosphate phosphodiesterase eta-1	0.00139665	0.438607	0.111537	-1.189	0.9526	0	0.448108	2.20397e+06	987616	2.55619e+06	1.85175e+06	1.23377e+06	741460
O43847	NRDC	Nardilysin	0.0405028	0.439215	0.188067	-1.187	0.7257	0	0.425817	1.69122e+07	7.20149e+06	2.25469e+07	1.12775e+07	5.52396e+06	8.87902e+06
P48506	GCLC	Glutamate--cysteine ligase catalytic subunit	0.0027933	0.43952	0.527315	-1.186	0.2779	0	0.325443	1.03183e+06	335800	1.80424e+06	259416	184589	487012
Q7Z3J2	VPS35L	VPS35 endosomal protein-sorting factor-like	0.0153631	0.439825	0.32451	-1.185	0.4888	0	0.521914	2.84146e+06	1.483e+06	3.21807e+06	2.46486e+06	666246	2.29975e+06
Q9H993	ARMT1	Damage-control phosphatase ARMT1	0.00558659	0.440435	0.13441	-1.183	0.8716	0	0.449328	1.13814e+07	5.11399e+06	1.35585e+07	9.20439e+06	3.7549e+06	6.47308e+06
P04818	TYMS	Thymidylate synthase	0.0321229	0.440435	0.114059	-1.183	0.9429	0	0.44023	1.24211e+07	5.46817e+06	1.50752e+07	9.76704e+06	4.32784e+06	6608494
P63172	DYNLT1	Dynein light chain Tctex-type 1	0.075419	0.441351	0.150016	-1.18	0.8239	0	0.462286	2.32456e+06	1.07461e+06	2.06493e+06	2584198	723603	1.42562e+06
Q8WTW3	COG1	Conserved oligomeric Golgi complex subunit 1	0.0181564	0.441658	0.460617	-1.179	0.3367	0	0.633462	847873	537095	876543	819202	152106	922085
Q15363	TMED2	Transmembrane emp24 domain-containing protein 2	0.0586592	0.442577	0.0933332	-1.176	1.03	0	0.425875	3.87825e+06	1.65165e+06	4.89451e+06	2.86199e+06	1.65815e+06	1.64515e+06
O95376	ARIH2	E3 ubiquitin-protein ligase ARIH2	0.0027933	0.442884	0.557974	-1.175	0.2534	0	0.752428	843357	634565	1.0267e+06	660019	115873	1.15326e+06
Q15386	UBE3C	Ubiquitin-protein ligase E3C	0.0251397	0.442884	0.371275	-1.175	0.4303	0	0.5485	1.25694e+06	689431	1.06492e+06	1.44896e+06	274127	1.10474e+06
Q96HW7	INTS4	Integrator complex subunit 4	0.0572626	0.443498	0.0143362	-1.173	1.844	0	0.445307	375140	167052	383079	367200	151039	183065
P30566	ADSL	Adenylosuccinate lyase	0.099162	0.443806	0.178336	-1.172	0.7488	0	0.424738	4.34592e+07	1.84588e+07	5.81695e+07	2.8749e+07	1.51015e+07	2.1816e+07
Q96F63	CCDC97	Coiled-coil domain-containing protein 97	0.00558659	0.446273	0.085328	-1.164	1.069	0	0.44862	1.31671e+06	590702	1.52088e+06	1.11254e+06	475702	705702
Q9P206	KIAA1522	Uncharacterized protein KIAA1522	0.00698324	0.446273	0.0587063	-1.164	1.231	0	0.452935	2.65345e+06	1.20184e+06	2.84667e+06	2.46023e+06	1.4274e+06	976286
Q9BY32	ITPA	Inosine triphosphate pyrophosphatase	0.0265363	0.446583	0.118097	-1.163	0.9278	0	0.448087	8.58627e+06	3.8474e+06	1.03103e+07	6.8622e+06	2.98848e+06	4.70632e+06
Q92538	GBF1	Golgi-specific brefeldin A-resistance guanine nucleotide exchange factor 1	0.0768156	0.448755	0.192956	-1.156	0.7145	0	0.480929	6.33873e+06	3.04848e+06	7096694	5.58077e+06	1.89759e+06	4.19937e+06
Q9HBI1	PARVB	Beta-parvin	0	0.450313	0.262787	-1.151	0.5804	0	0.480071	2.45041e+06	1.17637e+06	3.06744e+06	1.83338e+06	681737	1.671e+06
O14972	VPS26C	Vacuolar protein sorting-associated protein 26C	0	0.45125	0.422498	-1.148	0.3742	0	0.598408	983970	588816	1.06724e+06	900698	200785	976847
Q96C86	DCPS	m7GpppX diphosphatase	0.00698324	0.45125	0.222572	-1.148	0.6525	0	0.412536	9.50918e+06	3.92288e+06	1.34715e+07	5.54687e+06	3.54006e+06	4.30569e+06
Q00169	PITPNA	Phosphatidylinositol transfer protein alpha isoform	0.0321229	0.45219	0.109423	-1.145	0.9609	0	0.443464	1.8064e+06	801071	2244008	1.36878e+06	917666	684477
Q9UI09	NDUFA12	NADH dehydrogenase [ubiquinone] 1 alpha subcomplex subunit 12	0.00837989	0.452817	0.404613	-1.143	0.393	0	0.570032	6.64237e+06	3.78636e+06	7.86337e+06	5.42137e+06	1.42242e+06	6.1503e+06
Q14012	CAMK1	Calcium/calmodulin-dependent protein kinase type 1	0.0139665	0.452817	0.0109577	-1.143	1.96	0	0.453245	345814	156739	349249	342379	143616	169861
P52306	RAP1GDS1	Rap1 GTPase-GDP dissociation stimulator 1	0	0.45376	0.0149325	-1.14	1.826	0	0.453607	3.78722e+06	1.71791e+06	4.11614e+06	3.4583e+06	1.64113e+06	1.79469e+06
O95182	NDUFA7	NADH dehydrogenase [ubiquinone] 1 alpha subcomplex subunit 7	0.027933	0.45376	0.074773	-1.14	1.126	0	0.44735	895109	400427	1.0709e+06	719317	354535	446319
O43765	SGTA	Small glutamine-rich tetratricopeptide repeat-containing protein alpha	0.0614525	0.455335	0.203755	-1.135	0.6909	0	0.497427	4.3877e+06	2.18256e+06	4.43021e+06	4.3452e+06	3054690	1.31044e+06
P28749	RBL1	Retinoblastoma-like protein 1	0.00139665	0.456283	0.100695	-1.132	0.997	0	0.469111	378110	177376	410164	346055	133034	221718
Q9Y6M7	SLC4A7	Sodium bicarbonate cotransporter 3	0.0614525	0.456283	0.143306	-1.132	0.8437	0	0.456403	589233	268927	727719	450747	207433	330422
Q96TC7	RMDN3	Regulator of microtubule dynamics protein 3	0.0027933	0.456599	0.195984	-1.131	0.7078	0	0.494151	3.58284e+06	1.77046e+06	3.80786e+06	3.35781e+06	1.08761e+06	2.45332e+06
O75487	GPC4	Glypican-4	0.0251397	0.456599	0.369989	-1.131	0.4318	0	0.555838	4.83542e+06	2.68771e+06	4.1361e+06	5.53474e+06	4.25895e+06	1.11648e+06
Q8IVL5	P3H2	Prolyl 3-hydroxylase 2	0	0.457233	0.123179	-1.129	0.9095	0	0.475539	2.36875e+06	1.12643e+06	2.14519e+06	2592305	1444581	808284
P19022	CDH2	Cadherin-2	0.0223464	0.45882	0.152493	-1.124	0.8168	0	0.441117	4.48624e+06	1.97896e+06	3.12402e+06	5.84847e+06	2.26183e+06	1.69609e+06
O43252	PAPSS1	Bifunctional 3'-phosphoadenosine 5'-phosphosulfate synthase 1	0.0265363	0.45882	0.267396	-1.124	0.5728	0	0.512243	4.47821e+06	2.29393e+06	5.02167e+06	3.93475e+06	1.23927e+06	3.3486e+06
Q9BRX5	GINS3	DNA replication complex GINS protein PSF3	0.00837989	0.460094	0.175232	-1.12	0.7564	0	0.434402	6.47434e+06	2.81247e+06	8.71867e+06	4230007	2.52143e+06	3.1035e+06
Q96ER9	CCDC51	Mitochondrial potassium channel	0	0.461052	0.0371175	-1.117	1.43	0	0.464509	2.63927e+06	1.22596e+06	2.82806e+06	2.45047e+06	1.06352e+06	1.3884e+06
Q92485	SMPDL3B	Acid sphingomyelinase-like phosphodiesterase 3b	0.00837989	0.462332	0.414256	-1.113	0.3827	0	0.542417	6.3386e+06	3.43817e+06	4.31122e+06	8.36599e+06	5.4668e+06	1.40954e+06
P57105	SYNJ2BP	Synaptojanin-2-binding protein	0	0.463294	0.0437574	-1.11	1.359	0	0.458232	1.44491e+06	662104	1.67378e+06	1.21604e+06	698574	625634
Q9Y3C4	TPRKB	EKC/KEOPS complex subunit TPRKB	0	0.463937	0.0913075	-1.108	1.039	0	0.478592	844647	404241	870590	818704	306193	502289
Q9Y547	HSPB11	Intraflagellar transport protein 25 homolog	0.0209497	0.464902	0.130944	-1.105	0.8829	0	0.452053	2.72033e+06	1.22973e+06	1.99188e+06	3.44879e+06	1.06418e+06	1.39529e+06
O60613	SELENOF	Selenoprotein F	0.027933	0.465225	0.142129	-1.104	0.8473	0	0.447994	1.14972e+06	515068	1.48394e+06	815498	449832	580304
Q68EM7	ARHGAP17	Rho GTPase-activating protein 17	0.0446927	0.465547	0.372612	-1.103	0.4287	0	0.555579	1.59658e+06	887024	1.89495e+06	1.29821e+06	1391200	382849
Q9H270	VPS11	Vacuolar protein sorting-associated protein 11 homolog	0.00139665	0.466193	0.252091	-1.101	0.5984	0	0.419635	346347	145339	498871	193823	134014	156665
Q8IYI6	EXOC8	Exocyst complex component 8	0.0027933	0.466193	0.182851	-1.101	0.7379	0	0.491565	1.15692e+06	568701	1.301e+06	1.01283e+06	372744	764657
Q96B36	AKT1S1	Proline-rich AKT1 substrate 1	0.00558659	0.466193	0.0103567	-1.101	1.985	0	0.465654	1.45752e+06	678702	1.34769e+06	1.56736e+06	692633	664770
Q6NUK1	SLC25A24	Calcium-binding mitochondrial carrier protein SCaMC-1	0.0125698	0.466516	0.291687	-1.1	0.5351	0	0.516209	1.36479e+07	7.04518e+06	1.63421e+07	1.09538e+07	3.79232e+06	1.0298e+07
A6NDU8	RIMOC1	RAB7A-interacting MON1-CCZ1 complex subunit 1	0.0167598	0.466516	0.019186	-1.1	1.717	0	0.467996	449066	210161	434943	463188	188534	231788
P03886	MT-ND1	NADH-ubiquinone oxidoreductase chain 1	0.00418994	0.46684	0.0612756	-1.099	1.213	0	0.461137	1.12469e+06	518638	1.32771e+06	921680	480311	556966
Q9Y2Q3	GSTK1	Glutathione S-transferase kappa 1	0.0586592	0.46684	0.0312826	-1.099	1.505	0	0.46482	5.38586e+06	2.50345e+06	6.04489e+06	4.72682e+06	2.34201e+06	2.6649e+06
Q15631	TSN	Translin	0.0502793	0.467164	0.126407	-1.098	0.8982	0	0.449801	1.93763e+07	8.71548e+06	2.48988e+07	1.38538e+07	9.31841e+06	8.11254e+06
Q9P2R7	SUCLA2	Succinate--CoA ligase [ADP-forming] subunit beta, mitochondrial	0.047486	0.467812	0.176978	-1.096	0.7521	0	0.463466	1.4159e+07	6.5622e+06	1.80068e+07	1.03111e+07	4.99478e+06	8.12963e+06
Q02218	OGDH	2-oxoglutarate dehydrogenase complex component E1	0.0879888	0.468786	0.227993	-1.093	0.6421	0	0.473881	1.86189e+07	8.82314e+06	2.38328e+07	1.34049e+07	5.99132e+06	1.1655e+07
Q5TBB1	RNASEH2B	Ribonuclease H2 subunit B	0.00698324	0.469436	0.0848815	-1.091	1.071	0	0.479004	2.51565e+06	1.20501e+06	2.71086e+06	2.32044e+06	941653	1.46836e+06
Q9UJY4	GGA2	ADP-ribosylation factor-binding protein GGA2	0.00837989	0.469436	0.126133	-1.091	0.8992	0	0.485679	1.53631e+06	746151	1.68352e+06	1.38909e+06	540884	951418
P13798	APEH	Acylamino-acid-releasing enzyme	0.0488827	0.470087	0.190062	-1.089	0.7211	0	0.462252	1.18543e+07	5479691	1.53626e+07	8.34607e+06	4.21363e+06	6.74575e+06
Q9GZP4	PITHD1	PITH domain-containing protein 1	0.047486	0.470739	0.174343	-1.087	0.7586	0	0.500118	1.31417e+06	657241	1.21768e+06	1.41067e+06	432225	882256
Q96RS6	NUDCD1	NudC domain-containing protein 1	0.00977654	0.471392	0.101502	-1.085	0.9935	0	0.459345	1.57172e+06	721962	1.95642e+06	1.18702e+06	773504	670419
Q9BTM9	URM1	Ubiquitin-related modifier 1	0.00139665	0.472046	0.123211	-1.083	0.9093	0	0.467544	1.06946e+06	500018	1.31006e+06	828859	410774	589263
Q9H267	VPS33B	Vacuolar protein sorting-associated protein 33B	0.0167598	0.472046	0.553542	-1.083	0.2568	0	0.765397	3.10091e+06	2.37343e+06	3.22682e+06	2.97501e+06	506354	4.24051e+06
P53990	IST1	IST1 homolog	0.0111732	0.472374	0.276528	-1.082	0.5583	0	0.530851	2.26077e+06	1.20013e+06	2.06378e+06	2.45775e+06	1.75471e+06	645546
Q13232	NME3	Nucleoside diphosphate kinase 3	0.027933	0.472701	0.0384263	-1.081	1.415	0	0.470033	3.12896e+06	1.47071e+06	3.54645e+06	2.71147e+06	1.36663e+06	1.57479e+06
Q9NQX4	MYO5C	Unconventional myosin-Vc	0.0502793	0.473357	0.430964	-1.079	0.3656	0	0.58782	2.36777e+06	1.39182e+06	1.83345e+06	2.90208e+06	2.25794e+06	525704
O00442	RTCA	RNA 3'-terminal phosphate cyclase	0.0432961	0.474671	0.184485	-1.075	0.734	0	0.499816	7.18703e+06	3.59219e+06	8.09477e+06	6.27928e+06	2.37595e+06	4.80843e+06
P17568	NDUFB7	NADH dehydrogenase [ubiquinone] 1 beta subcomplex subunit 7	0	0.47533	0.290093	-1.073	0.5375	0	0.456993	1.46331e+06	668724	2.04406e+06	882570	466884	870565
Q14232	EIF2B1	Translation initiation factor eIF-2B subunit alpha	0.0418994	0.475989	0.0572467	-1.071	1.242	0	0.471485	5.26263e+06	2481252	4.44045e+06	6.08481e+06	2.72687e+06	2.23563e+06
P11766	ADH5	Alcohol dehydrogenase class-3	0.0782123	0.47698	0.114658	-1.068	0.9406	0	0.460897	2.57821e+07	1.18829e+07	32431368	1.91329e+07	1.09715e+07	1.27943e+07
P28161	GSTM2	Glutathione S-transferase Mu 2	0.0307263	0.478636	0.170794	-1.063	0.7675	0	0.452778	5.94366e+06	2.69116e+06	7.91955e+06	3.96776e+06	2.86452e+06	2.5178e+06
P29992	GNA11	Guanine nucleotide-binding protein subunit alpha-11	0.0460894	0.478968	0.0991864	-1.062	1.004	0	0.483229	8.88949e+06	4.29566e+06	7.56837e+06	1.02106e+07	5.14827e+06	3.44304e+06
O43169	CYB5B	Cytochrome b5 type B	0.0432961	0.479965	0.0689751	-1.059	1.161	0	0.489136	6.39598e+06	3.12851e+06	6.74088e+06	6.05109e+06	3.73232e+06	2.5247e+06
Q9UGQ2	CACFD1	Calcium channel flower homolog	0	0.480297	0.146394	-1.058	0.8345	0	0.504347	6.74035e+06	3.39948e+06	6.63036e+06	6.85033e+06	2.35874e+06	4.44021e+06
P36405	ARL3	ADP-ribosylation factor-like protein 3	0.0209497	0.480297	0.169716	-1.058	0.7703	0	0.48707	6.98735e+06	3.40333e+06	5.52395e+06	8.45076e+06	4.31746e+06	2.48921e+06
P0DJ07	PET100	Protein PET100 homolog, mitochondrial	0.00139665	0.481297	0.149571	-1.055	0.8252	0	0.502938	1.77373e+06	892078	1.63205e+06	1.91542e+06	624964	1159193
P12955	PEPD	Xaa-Pro dipeptidase	0.0614525	0.481297	0.131459	-1.055	0.8812	0	0.461741	8.62786e+06	3.98384e+06	11081282	6.17444e+06	3.86976e+06	4.09791e+06
O60637	TSPAN3	Tetraspanin-3	0.0139665	0.482299	0.00627256	-1.052	2.203	0	0.4833	1.77161e+06	856221	1.8456e+06	1.69763e+06	890182	822260
Q9HB40	SCPEP1	Retinoid-inducible serine carboxypeptidase	0.0153631	0.482634	0.00130505	-1.051	2.884	0	0.483	820327	396218	798873	841782	395132	397305
P29218	IMPA1	Inositol monophosphatase 1	0.0460894	0.482634	0.0673172	-1.051	1.172	0	0.486756	2.43658e+06	1.18602e+06	2174423	2.69874e+06	1.38288e+06	989162
Q9UDR5	AASS	Alpha-aminoadipic semialdehyde synthase, mitochondrial	0.0502793	0.482968	0.242254	-1.05	0.6157	0	0.528202	6.68425e+06	3.53064e+06	7.19581e+06	6.17269e+06	2.08345e+06	4.97783e+06
P25054	APC	Adenomatous polyposis coli protein	0.0921788	0.483638	0.450138	-1.048	0.3467	0	0.61254	987614	604953	782723	1.1925e+06	220036	989870
Q9Y605	MRFAP1	MORF4 family-associated protein 1	0.0167598	0.486327	0.13202	-1.04	0.8794	0	0.487282	877019	427356	1.04982e+06	704214	338005	516707
O94855	SEC24D	Protein transport protein Sec24D	0.00558659	0.487002	0.542301	-1.038	0.2658	0	0.47514	1.3655e+06	648802	2.20827e+06	522718	265832	1.03177e+06
O43598	DNPH1	2'-deoxynucleoside 5'-phosphate N-hydrolase 1	0.0446927	0.48734	0.207687	-1.037	0.6826	0	0.515653	5.85335e+06	3.01829e+06	5.05861e+06	6.64809e+06	4.08138e+06	1.95521e+06
A0AVT1	UBA6	Ubiquitin-like modifier-activating enzyme 6	0.047486	0.48734	0.0146549	-1.037	1.834	0	0.484348	1.38369e+07	6.70188e+06	1.50329e+07	1.26409e+07	6.62335e+06	6.78042e+06
Q8WVY7	UBLCP1	Ubiquitin-like domain-containing CTD phosphatase 1	0.0027933	0.487678	0.140227	-1.036	0.8532	0	0.468608	8.77375e+06	4.11145e+06	1.12912e+07	6.25633e+06	3.85805e+06	4.36485e+06
P49642	PRIM1	DNA primase small subunit	0.0251397	0.487678	0.177581	-1.036	0.7506	0	0.482017	9.76741e+06	4.70806e+06	1.23732e+07	7.1616e+06	3.69361e+06	5.72251e+06
Q14139	UBE4A	Ubiquitin conjugation factor E4 A	0.0111732	0.488016	0.0804593	-1.035	1.094	0	0.494366	2.91572e+06	1.44143e+06	3.21986e+06	2.61157e+06	1.16848e+06	1.71438e+06
Q13098	GPS1	COP9 signalosome complex subunit 1	0.0935754	0.488016	0.17732	-1.035	0.7512	0	0.459495	1.4522e+07	6.67279e+06	1.94148e+07	9.62916e+06	6.55146e+06	6.79412e+06
Q9Y2Y0	ARL2BP	ADP-ribosylation factor-like protein 2-binding protein	0.00139665	0.488354	0.136165	-1.034	0.8659	0	0.510399	1.90204e+06	970799	1.90621e+06	1.89788e+06	692257	1.24934e+06
Q9UQB8	BAIAP2	Brain-specific angiogenesis inhibitor 1-associated protein 2	0.0139665	0.489032	0.118369	-1.032	0.9268	0	0.506778	7.80221e+06	3.95399e+06	7.74179e+06	7862632	5.00248e+06	2.9055e+06
O75431	MTX2	Metaxin-2	0.027933	0.48971	0.118729	-1.03	0.9254	0	0.481846	1.11733e+06	538382	1.37004e+06	864622	461813	614950
P04040	CAT	Catalase	0.0796089	0.492092	0.139392	-1.023	0.8558	0	0.513483	1.76547e+06	906540	1.88585e+06	1.6451e+06	1.16225e+06	650829
O75306	NDUFS2	NADH dehydrogenase [ubiquinone] iron-sulfur protein 2, mitochondrial	0.0600559	0.492433	0.1682	-1.022	0.7742	0	0.510484	2.04996e+07	1.04647e+07	2.31644e+07	1.78349e+07	7.36331e+06	1.35662e+07
Q15276	RABEP1	Rab GTPase-binding effector protein 1	0.075419	0.492433	0.00558388	-1.022	2.253	0	0.492456	2.51356e+06	1.23782e+06	2.45685e+06	2.57027e+06	1.29718e+06	1178451
Q96I59	NARS2	Probable asparagine--tRNA ligase, mitochondrial	0.00837989	0.492775	0.15669	-1.021	0.805	0	0.49481	3.9708e+06	1.96479e+06	4.80971e+06	3.13188e+06	1.51184e+06	2.41774e+06
P28676	GCA	Grancalcin	0.00139665	0.493116	0.0909087	-1.02	1.041	0	0.487054	473332	230538	566080	380585	257016	204061
P27707	DCK	Deoxycytidine kinase	0.0027933	0.494143	0.286225	-1.017	0.5433	0	0.539931	1.52477e+06	823271	1769844	1.2797e+06	469078	1.17747e+06
Q13308	PTK7	Inactive tyrosine-protein kinase 7	0.00418994	0.494828	0.38273	-1.015	0.4171	0	0.507672	3.91388e+06	1.98697e+06	5.44373e+06	2.38403e+06	1096393	2.87754e+06
Q9BVL2	NUP58	Nucleoporin p58/p45	0.0209497	0.495171	0.446631	-1.014	0.3501	0	0.639136	2.48635e+06	1.58911e+06	2.49073e+06	2.48197e+06	582096	2.59613e+06
O00244	ATOX1	Copper transport protein ATOX1	0.0349162	0.495515	0.271407	-1.013	0.5664	0	0.544333	6.26566e+06	3.4106e+06	5.5946e+06	6.93672e+06	4.8582e+06	1.963e+06
Q13685	AAMP	Angio-associated migratory cell protein	0.0586592	0.495858	0.0477887	-1.012	1.321	0	0.497326	2.78173e+06	1.38343e+06	2.48097e+06	3.08249e+06	1.2227e+06	1.54415e+06
Q9UH03	SEPTIN3	Neuronal-specific septin-3	0.00139665	0.496202	0.129249	-1.011	0.8886	0	0.480974	460134	221312	581552	338715	205437	237188
Q3KQV9	UAP1L1	UDP-N-acetylhexosamine pyrophosphorylase-like protein 1	0.00977654	0.496891	0.16858	-1.009	0.7732	0	0.471469	256609	120983	338630	174587	120743	121223
Q5JRX3	PITRM1	Presequence protease, mitochondrial	0.0879888	0.496891	0.3406	-1.009	0.4678	0	0.471228	1.35343e+07	6.37775e+06	1.93987e+07	7.6699e+06	4.40361e+06	8.35188e+06
Q9H3S7	PTPN23	Tyrosine-protein phosphatase non-receptor type 23	0.0796089	0.497235	0.214185	-1.008	0.6692	0	0.534862	3.46221e+06	1.8518e+06	3.63507e+06	3.28935e+06	1.17338e+06	2.53022e+06
Q9Y3P9	RABGAP1	Rab GTPase-activating protein 1	0.0684358	0.49758	0.297123	-1.007	0.5271	0	0.548009	2.30871e+06	1.26519e+06	2.68135e+06	1.93606e+06	706877	1.82351e+06
Q92542	NCSTN	Nicastrin	0.0251397	0.497925	0.00467481	-1.006	2.33	0	0.497986	1.65334e+06	823342	1.59004e+06	1.71664e+06	800680	846004
Q5T160	RARS2	Probable arginine--tRNA ligase, mitochondrial	0.0195531	0.498961	0.109076	-1.003	0.9623	0	0.515144	1.55028e+06	798618	1.62507e+06	1.47549e+06	605967	991269
P55011	SLC12A2	Solute carrier family 12 member 2	0.0460894	0.499307	0.0851728	-1.002	1.07	0	0.495552	1.76571e+06	875001	2.06811e+06	1.46331e+06	763338	986665
P61421	ATP6V0D1	V-type proton ATPase subunit d 1	0.0167598	0.5	0.109926	-1	0.9589	0	0.510522	4.40778e+06	2.25027e+06	4.84272e+06	3.97284e+06	1.73587e+06	2.76467e+06
Q96JB5	CDK5RAP3	CDK5 regulatory subunit-associated protein 3	0.0335196	0.500139	0.0607126	-0.9996	1.217	0	0.508474	5.10961e+06	2.5981e+06	4.98093e+06	5.23828e+06	2.14296e+06	3.05325e+06
Q8N5M1	ATPAF2	ATP synthase mitochondrial F1 complex assembly factor 2	0.00418994	0.500867	0.323838	-0.9975	0.4897	0	0.532449	1.70626e+06	908497	2.1648e+06	1.24772e+06	521380	1.29561e+06
P00568	AK1	Adenylate kinase isoenzyme 1	0.0307263	0.500971	0.210161	-0.9972	0.6774	0	0.526987	7.86404e+06	4.14425e+06	6.77449e+06	8.95359e+06	5.54526e+06	2.74324e+06
Q16851	UGP2	UTP--glucose-1-phosphate uridylyltransferase	0.0195531	0.501041	0.137225	-0.997	0.8626	0	0.497518	3.98228e+06	1.98126e+06	4.83991e+06	3124655	1.62444e+06	2.33808e+06
Q6ZNB6	NFXL1	NF-X1-type zinc finger protein NFXL1	0.0125698	0.50111	0.213307	-0.9968	0.671	0	0.537389	2.45017e+06	1.31669e+06	2.40256e+06	2.49778e+06	836646	1.79674e+06
A1L0T0	ILVBL	2-hydroxyacyl-CoA lyase 2	0.0544693	0.501388	0.274356	-0.996	0.5617	0	0.53311	1.97626e+06	1.05356e+06	1.5607e+06	2.39182e+06	642202	1.46492e+06
Q9NP79	VTA1	Vacuolar protein sorting-associated protein VTA1 homolog	0.0446927	0.502084	0.0160289	-0.994	1.795	0	0.50386	7.65038e+06	3.85472e+06	7.75812e+06	7.54264e+06	4.18647e+06	3.52298e+06
Q9Y570	PPME1	Protein phosphatase methylesterase 1	0.0488827	0.502153	0.25804	-0.9938	0.5883	0	0.484958	4.10599e+06	1.99123e+06	5.54472e+06	2.66725e+06	1.51401e+06	2.46845e+06
Q99956	DUSP9	Dual specificity protein phosphatase 9	0.00139665	0.502397	0.0520425	-0.9931	1.284	0	0.496405	1.06828e+06	530302	1.2399e+06	896672	518297	542308
Q86X29	LSR	Lipolysis-stimulated lipoprotein receptor	0.0195531	0.502502	0.113972	-0.9928	0.9432	0	0.488729	1.52654e+06	746066	1.15842e+06	1.89466e+06	799790	692342
Q3LXA3	TKFC	Triokinase/FMN cyclase	0.00139665	0.502536	0.220433	-0.9927	0.6567	0	0.46687	5.48199e+06	2.55938e+06	7.51418e+06	3.4498e+06	2.46357e+06	2.65518e+06
P17302	GJA1	Gap junction alpha-1 protein	0.0139665	0.50285	0.519937	-0.9918	0.284	0	0.646267	2.08946e+06	1.35035e+06	1.41384e+06	2.76509e+06	2.26337e+06	437330
Q04206	RELA	Transcription factor p65	0.0488827	0.504351	0.271057	-0.9875	0.5669	0	0.555236	7.10507e+06	3.94499e+06	6.65563e+06	7.55451e+06	2.27658e+06	5.6134e+06
Q8N668	COMMD1	COMM domain-containing protein 1	0.0195531	0.504386	0.212966	-0.9874	0.6717	0	0.540209	783985	423516	750699	817271	271074	575957
Q15554	TERF2	Telomeric repeat-binding factor 2	0.0293296	0.505471	0.0349514	-0.9843	1.457	0	0.509179	958173	487881	922525	993820	426515	549247
Q13564	NAE1	NEDD8-activating enzyme E1 regulatory subunit	0.0502793	0.506418	0.203289	-0.9816	0.6919	0	0.492504	1.1342e+07	5.58601e+06	1.47579e+07	7.92619e+06	4.54455e+06	6.62746e+06
Q9NZC9	SMARCAL1	SWI/SNF-related matrix-associated actin-dependent regulator of chromatin subfamily A-like protein 1	0.00558659	0.506909	0.134487	-0.9802	0.8713	0	0.526468	4.24493e+06	2.23482e+06	4.18482e+06	4.30503e+06	1.63351e+06	2.83612e+06
Q96SB3	PPP1R9B	Neurabin-2	0.0782123	0.508282	0.40538	-0.9763	0.3921	0	0.607718	1.15033e+06	699078	991998	1.30867e+06	1.09026e+06	307895
Q9Y2X7	GIT1	ARF GTPase-activating protein GIT1	0.0405028	0.508387	0.307455	-0.976	0.5122	0	0.544348	1.6417e+06	893657	2.00367e+06	1.27973e+06	521349	1.26597e+06
Q05397	PTK2	Focal adhesion kinase 1	0.0027933	0.508564	0.491596	-0.9755	0.3084	0	0.667134	1.77643e+06	1.18511e+06	2.06455e+06	1.4883e+06	402541	1.96769e+06
Q12972	PPP1R8	Nuclear inhibitor of protein phosphatase 1	0.0181564	0.508634	0.00487946	-0.9753	2.312	0	0.509394	4.46706e+06	2.27549e+06	4.36908e+06	4.56505e+06	2.18011e+06	2.37088e+06
Q9Y4B6	DCAF1	DDB1- and CUL4-associated factor 1	0.00977654	0.509022	0.129016	-0.9742	0.8894	0	0.527946	1.30792e+06	690509	1.35009e+06	1.26575e+06	509693	871326
O95674	CDS2	Phosphatidate cytidylyltransferase 2	0.00558659	0.509057	0.558143	-0.9741	0.2533	0	0.725512	1.68672e+06	1.22374e+06	2.10014e+06	1.2733e+06	326402	2.12107e+06
P13473	LAMP2	Lysosome-associated membrane glycoprotein 2	0.0349162	0.510258	0.0216724	-0.9707	1.664	0	0.51136	8.24061e+06	4.21392e+06	7.82318e+06	8.65804e+06	4.57557e+06	3.85227e+06
Q9H9Q2	COPS7B	COP9 signalosome complex subunit 7b	0.0335196	0.510365	0.0213698	-0.9704	1.67	0	0.508331	5.11765e+06	2.60146e+06	5.62569e+06	4.60961e+06	2.60381e+06	2.59911e+06
Q96GG9	DCUN1D1	DCN1-like protein 1	0	0.511356	0.130818	-0.9676	0.8833	0	0.529299	320734	169765	300551	340918	213465	126064
P00387	CYB5R3	NADH-cytochrome b5 reductase 3	0.0893855	0.511959	0.235458	-0.9659	0.6281	0	0.483475	2.90895e+07	1.4064e+07	3.94778e+07	1.87011e+07	1.59896e+07	1.21384e+07
Q9Y5Z4	HEBP2	Heme-binding protein 2	0.0363128	0.513523	0.223587	-0.9615	0.6506	0	0.501469	1.32264e+06	663261	919568	1.7257e+06	804026	522496
P09669	COX6C	Cytochrome c oxidase subunit 6C	0.0321229	0.513701	0.165795	-0.961	0.7804	0	0.520568	1.29261e+07	6.72892e+06	15366607	1.04856e+07	5.1068e+06	8.35104e+06
Q9UHY1	NRBP1	Nuclear receptor-binding protein	0.0181564	0.514093	0.209107	-0.9599	0.6796	0	0.543104	2.58818e+06	1.40565e+06	2.34255e+06	2.83381e+06	930829	1.88047e+06
O43681	GET3	ATPase GET3	0.0558659	0.514271	0.144732	-0.9594	0.8394	0	0.49806	1.09338e+07	5.44571e+06	1.38508e+07	8.0169e+06	5.84732e+06	5.0441e+06
Q08752	PPID	Peptidyl-prolyl cis-trans isomerase D	0.0209497	0.514627	0.00321714	-0.9584	2.493	0	0.514213	8.22505e+06	4.22943e+06	8526495	7.92361e+06	4.19713e+06	4.26173e+06
Q8TCT9	HM13	Minor histocompatibility antigen H13	0.0726257	0.515413	0.108154	-0.9562	0.966	0	0.528853	7.1122e+06	3.76131e+06	7.45027e+06	6.77413e+06	2.90189e+06	4.62073e+06
O75368	SH3BGRL	Adapter SH3BGRL	0.0293296	0.516163	0.298943	-0.9541	0.5244	0	0.552907	7.77456e+06	4.29861e+06	6.19029e+06	9.35883e+06	6.03425e+06	2.56297e+06
Q9BTY7	HGH1	Protein HGH1 homolog	0.0153631	0.517381	0.218677	-0.9507	0.6602	0	0.549547	2.95638e+06	1.62467e+06	3.20404e+06	2.70873e+06	1.06014e+06	2.1892e+06
P36543	ATP6V1E1	V-type proton ATPase subunit E 1	0.0600559	0.518099	0.380139	-0.9487	0.4201	0	0.602393	5.25931e+06	3.16817e+06	5.87036e+06	4648270	1.52059e+06	4.81576e+06
P48637	GSS	Glutathione synthetase	0.0251397	0.518674	0.0796533	-0.9471	1.099	0	0.529766	1.16201e+07	6.15593e+06	1.12761e+07	1.1964e+07	7.33859e+06	4.97328e+06
Q13126	MTAP	S-methyl-5'-thioadenosine phosphorylase	0.0698324	0.520114	0.194072	-0.9431	0.712	0	0.532307	6.37812e+06	3.39512e+06	5.22288e+06	7.53335e+06	4.34479e+06	2.44544e+06
O94788	ALDH1A2	Retinal dehydrogenase 2	0.0949721	0.52033	0.0937406	-0.9425	1.028	0	0.531745	2.04573e+06	1.08781e+06	1.94493e+06	2.14652e+06	1.31322e+06	862389
P09960	LTA4H	Leukotriene A-4 hydrolase	0.0921788	0.520511	0.191797	-0.942	0.7172	0	0.493813	6.20305e+07	3.06315e+07	8.1854e+07	4.22069e+07	2.88564e+07	3.24066e+07
Q96PE3	INPP4A	Inositol polyphosphate-4-phosphatase type I A	0.00418994	0.520836	0.0596851	-0.9411	1.224	0	0.522769	129347	67618.6	143105	115590	76373.7	58863.6
Q96KP4	CNDP2	Cytosolic non-specific dipeptidase	0.0251397	0.521052	0.137009	-0.9405	0.8633	0	0.503257	19606252	9.86698e+06	2.47322e+07	1.44803e+07	9.44212e+06	1.02918e+07
Q92783	STAM	Signal transducing adapter molecule 1	0.0963687	0.521088	0.245338	-0.9404	0.6102	0	0.559869	3.59549e+06	2.013e+06	3.8609e+06	3.33008e+06	1.26075e+06	2.76526e+06
Q96PC5	MIA2	Melanoma inhibitory activity protein 2	0	0.521197	0.0983164	-0.9401	1.007	0	0.525697	1.36842e+06	719371	1.19011e+06	1.54672e+06	593431	845312
Q12768	WASHC5	WASH complex subunit 5	0.0167598	0.521667	0.349342	-0.9388	0.4567	0	0.540091	3.12463e+06	1.68758e+06	4.11157e+06	2.13768e+06	1.00872e+06	2.36645e+06
Q9NQ48	LZTFL1	Leucine zipper transcription factor-like protein 1	0.00837989	0.522463	0.0740329	-0.9366	1.131	0	0.522092	2.84145e+06	1.4835e+06	3.24484e+06	2.43807e+06	1.30494e+06	1.66206e+06
Q96RP9	GFM1	Elongation factor G, mitochondrial	0.0558659	0.522499	0.16588	-0.9365	0.7802	0	0.510274	1.93518e+07	9.87472e+06	2.42865e+07	1.44171e+07	8.37753e+06	1.13719e+07
Q92888	ARHGEF1	Rho guanine nucleotide exchange factor 1	0.00698324	0.522753	0.360172	-0.9358	0.4435	0	0.540505	4.79769e+06	2.59318e+06	6.38734e+06	3.20805e+06	1.5432e+06	3.64315e+06
Q9UID3	VPS51	Vacuolar protein sorting-associated protein 51 homolog	0.0614525	0.52297	0.474464	-0.9352	0.3238	0	0.67428	2.30069e+06	1.55131e+06	2.35565e+06	2.24574e+06	573585	2.52904e+06
Q7L5N1	COPS6	COP9 signalosome complex subunit 6	0.0684358	0.523441	0.0643672	-0.9339	1.191	0	0.526752	1.09911e+07	5.78959e+06	1.17464e+07	1.02358e+07	6.70395e+06	4.87522e+06
Q9Y296	TRAPPC4	Trafficking protein particle complex subunit 4	0	0.524676	0.135999	-0.9305	0.8665	0	0.530128	560706	297246	646283	475130	233955	360536
Q15257	PTPA	Serine/threonine-protein phosphatase 2A activator	0.0181564	0.524676	0.0530223	-0.9305	1.276	0	0.519171	1.03985e+07	5.39862e+06	1.1992e+07	8.80507e+06	5.44431e+06	5.35293e+06
O14562	UBFD1	Ubiquitin domain-containing protein UBFD1	0.0405028	0.527594	0.0514069	-0.9225	1.289	0	0.529021	1.03168e+06	545781	949266	1.1141e+06	615752	475810
Q9BU23	LMF2	Lipase maturation factor 2	0.0307263	0.529279	0.16108	-0.9179	0.793	0	0.551104	3.41304e+06	1.88094e+06	3.39906e+06	3.42702e+06	1.34648e+06	2.41539e+06
Q6DKJ4	NXN	Nucleoredoxin	0.0153631	0.529426	0.255901	-0.9175	0.5919	0	0.546745	4.17437e+06	2.28232e+06	5.08819e+06	3.26056e+06	1.54313e+06	3.02151e+06
Q9Y2Q9	MRPS28	28S ribosomal protein S28, mitochondrial	0.0907821	0.529646	0.0533115	-0.9169	1.273	0	0.523785	6.45427e+06	3.38065e+06	5.47647e+06	7.43208e+06	3.43073e+06	3.33057e+06
Q96EK5	KIFBP	KIF-binding protein	0.0698324	0.53016	0.221287	-0.9155	0.655	0	0.521411	8.92433e+06	4.65324e+06	1.14173e+07	6.43133e+06	3.6445e+06	5.66199e+06
Q9Y4X5	ARIH1	E3 ubiquitin-protein ligase ARIH1	0.00698324	0.530601	0.305152	-0.9143	0.5155	0	0.573976	2.16188e+06	1.24087e+06	2.50216e+06	1.82159e+06	732128	1.7496e+06
Q9GZU8	PSME3IP1	PSME3-interacting protein	0.0768156	0.530712	0.0195395	-0.914	1.709	0	0.533063	673007	358755	661344	684671	327454	390057
P49406	MRPL19	39S ribosomal protein L19, mitochondrial	0.0824022	0.530859	0.0642264	-0.9136	1.192	0	0.537068	9213031	4.94802e+06	8.72135e+06	9.70471e+06	4.16352e+06	5.73253e+06
Q07960	ARHGAP1	Rho GTPase-activating protein 1	0.0293296	0.531374	0.0853629	-0.9122	1.069	0	0.525344	6.28183e+06	3.30012e+06	7.37117e+06	5.19248e+06	3.00323e+06	3.59701e+06
O43708	GSTZ1	Maleylacetoacetate isomerase	0.00139665	0.531816	0.079063	-0.911	1.102	0	0.524718	325768	170937	385946	265590	165421	176452
P0CG35	TMSB15B	Thymosin beta-15B	0.0153631	0.532074	0.137912	-0.9103	0.8604	0	0.549914	1.59437e+06	876767	1.54288e+06	1.64586e+06	1.09948e+06	654052
A4D1P6	WDR91	WD repeat-containing protein 91	0	0.532148	0.196551	-0.9101	0.7065	0	0.533795	1.41546e+06	755568	1.7282e+06	1.10273e+06	577168	933967
O15111	CHUK	Inhibitor of nuclear factor kappa-B kinase subunit alpha	0.00977654	0.532222	0.273359	-0.9099	0.5633	0	0.579131	5.71232e+06	3.30818e+06	6.04897e+06	5.37567e+06	2.00216e+06	4.6142e+06
O95168	NDUFB4	NADH dehydrogenase [ubiquinone] 1 beta subcomplex subunit 4	0.00698324	0.532296	0.359697	-0.9097	0.4441	0	0.608229	1.87719e+06	1.14176e+06	1.95491e+06	1.79947e+06	584780	1.69874e+06
Q2M389	WASHC4	WASH complex subunit 4	0.023743	0.532296	0.303618	-0.9097	0.5177	0	0.584372	2.84904e+06	1.6649e+06	3.10994e+06	2.58814e+06	962709	2.36709e+06
O15550	KDM6A	Lysine-specific demethylase 6A	0.0209497	0.53237	0.432415	-0.9095	0.3641	0	0.537009	1.62855e+06	874544	2.31576e+06	941334	494817	1.25427e+06
Q13867	BLMH	Bleomycin hydrolase	0.0879888	0.532665	0.0951155	-0.9087	1.022	0	0.527721	1.08395e+07	5.72026e+06	1.27716e+07	8.9075e+06	6.3195e+06	5.12101e+06
P13987	CD59	CD59 glycoprotein	0.0125698	0.532739	0.541394	-0.9085	0.2665	0	0.68635	4.26543e+06	2.92758e+06	3.02545e+06	5.5054e+06	4.88636e+06	968789
P07602	PSAP	Prosaposin	0.0195531	0.534033	0.0416654	-0.905	1.38	0	0.536702	1.28307e+06	688627	1.33433e+06	1.23181e+06	774881	602374
Q9BW85	YJU2	Splicing factor YJU2	0.0600559	0.534144	0.323526	-0.9047	0.4901	0	0.593396	1.04399e+06	619502	1.13823e+06	949761	346407	892597
Q9BUE0	MED18	Mediator of RNA polymerase II transcription subunit 18	0	0.534366	0.0200859	-0.9041	1.697	0	0.535481	861373	461249	905900	816846	495328	427170
Q13542	EIF4EBP2	Eukaryotic translation initiation factor 4E-binding protein 2	0.027933	0.534477	0.0808004	-0.9038	1.093	0	0.544649	255207	138998	258702	251712	164871	113125
Q9H9A5	CNOT10	CCR4-NOT transcription complex subunit 10	0.0502793	0.534588	0.516294	-0.9035	0.2871	0	0.708339	1.63833e+06	1.16049e+06	1.80629e+06	1.47036e+06	394431	1.92655e+06
Q9HC21	SLC25A19	Mitochondrial thiamine pyrophosphate carrier	0.00418994	0.534959	0.495027	-0.9025	0.3054	0	0.661127	966935	639268	740825	1.19305e+06	244999	1.03354e+06
O75312	ZPR1	Zinc finger protein ZPR1	0.00977654	0.535924	0.0902134	-0.8999	1.045	0	0.538726	4.07246e+06	2.19394e+06	3.53902e+06	4.60591e+06	1.86348e+06	2.52441e+06
Q9Y487	ATP6V0A2	V-type proton ATPase 116 kDa subunit a 2	0.00139665	0.536184	0.309195	-0.8992	0.5098	0	0.578995	181824	105275	211837	151811	62600.6	147950
O95352	ATG7	Ubiquitin-like modifier-activating enzyme ATG7	0.0125698	0.536333	0.404439	-0.8988	0.3931	0	0.598414	1.21906e+06	729505	1.51235e+06	925774	369372	1.08964e+06
Q8NHP8	PLBD2	Putative phospholipase B-like 2	0.0377095	0.53637	0.0318267	-0.8987	1.497	0	0.536852	353983	190036	380618	327347	205993	174080
Q06547	GABPB1	GA-binding protein subunit beta-1	0	0.536891	0.3656	-0.8973	0.437	0	0.52991	689408	365324	429385	949430	239170	491478
Q9HB07	MYG1	MYG1 exonuclease	0.0293296	0.53771	0.0244543	-0.8951	1.612	0	0.536648	7.79001e+06	4.18049e+06	8.44162e+06	7.1384e+06	4.39817e+06	3.96282e+06
Q9NWU2	GID8	Glucose-induced degradation protein 8 homolog	0.0642458	0.538381	0.0545024	-0.8933	1.264	0	0.532441	1.67988e+06	894438	1.92806e+06	1.4317e+06	908919	879956
O43747	AP1G1	AP-1 complex subunit gamma-1	0.0293296	0.538419	0.132543	-0.8932	0.8776	0	0.534314	2.5503e+07	1.36266e+07	3.05845e+07	2.04214e+07	1.16468e+07	1.56065e+07
P00846	MT-ATP6	ATP synthase subunit a	0.0446927	0.539502	0.131538	-0.8903	0.8809	0	0.553225	6.63211e+06	3.66905e+06	7.1001e+06	6.16411e+06	2808499	4.5296e+06
P61764	STXBP1	Syntaxin-binding protein 1	0.0027933	0.539614	0.468846	-0.89	0.329	0	0.641891	1.2781e+06	820403	1.57381e+06	982398	348080	1.29272e+06
P40855	PEX19	Peroxisomal biogenesis factor 19	0.0335196	0.539652	0.0131618	-0.8899	1.881	0	0.538565	1.49012e+06	802524	1.5878e+06	1.39243e+06	821832	783216
Q9H4M9	EHD1	EH domain-containing protein 1	0.00698324	0.541187	0.326012	-0.8858	0.4868	0	0.599224	1.33615e+07	8.00652e+06	1.46527e+07	1.20702e+07	4.52595e+06	1.14871e+07
Q96JG6	VPS50	Syndetin	0.0293296	0.542051	0.456899	-0.8835	0.3402	0	0.643308	1.44617e+06	930333	1.72361e+06	1.16873e+06	404676	1.45599e+06
Q9ULC4	MCTS1	Malignant T-cell-amplified sequence 1	0.0684358	0.542314	0.0708816	-0.8828	1.149	0	0.534584	4.56603e+06	2.44092e+06	3.78711e+06	5.34495e+06	2.3976e+06	2.48425e+06
Q9BT22	ALG1	Chitobiosyldiphosphodolichol beta-mannosyltransferase	0.0027933	0.542389	0.288129	-0.8826	0.5404	0	0.591033	3.01363e+06	1.78116e+06	3.19569e+06	2.83157e+06	1.07111e+06	2.4912e+06
Q6PCE3	PGM2L1	Glucose 1,6-bisphosphate synthase	0.00139665	0.542539	0.489733	-0.8822	0.31	0	0.614687	781943	480650	1.05178e+06	512103	211160	750140
Q6NW34	NEPRO	Nucleolus and neural progenitor protein	0.027933	0.542539	0.0604603	-0.8822	1.219	0	0.547047	1.31556e+06	719673	1.24182e+06	1.3893e+06	614748	824598
P43304	GPD2	Glycerol-3-phosphate dehydrogenase, mitochondrial	0.0656425	0.543744	0.102159	-0.879	0.9907	0	0.555332	2.70435e+06	1.50181e+06	2.77444e+06	2.63427e+06	1.19083e+06	1.8128e+06
Q96S52	PIGS	GPI transamidase component PIG-S	0.0125698	0.543857	0.124915	-0.8787	0.9034	0	0.535291	867729	464488	1.04475e+06	690711	407938	521037
Q9P1F3	ABRACL	Costars family protein ABRACL	0.0656425	0.54397	0.135128	-0.8784	0.8693	0	0.54841	8479050	4.64999e+06	7.19791e+06	9.76019e+06	5.5647e+06	3.73529e+06
P11172	UMPS	Uridine 5'-monophosphate synthase	0.0251397	0.544008	0.0772074	-0.8783	1.112	0	0.554276	2.6594e+07	1.47404e+07	2.60817e+07	2.71064e+07	1.21489e+07	1.7332e+07
Q9NR09	BIRC6	Baculoviral IAP repeat-containing protein 6	0.0502793	0.544121	0.438829	-0.878	0.3577	0	0.621042	4.68895e+06	2.91204e+06	5.83179e+06	3.54612e+06	1.3801e+06	4.44397e+06
Q9Y4R8	TELO2	Telomere length regulation protein TEL2 homolog	0.0460894	0.544763	0.0551263	-0.8763	1.259	0	0.544524	3.92973e+06	2.13983e+06	4.34629e+06	3.51317e+06	1.91896e+06	2.3607e+06
Q9Y5J9	TIMM8B	Mitochondrial import inner membrane translocase subunit Tim8 B	0.0837989	0.544763	0.0292202	-0.8763	1.534	0	0.546318	5.46004e+06	2.98292e+06	5.21165e+06	5.70844e+06	3.26869e+06	2.69715e+06
Q8WTS6	SETD7	Histone-lysine N-methyltransferase SETD7	0.00698324	0.545481	0.0850948	-0.8744	1.07	0	0.544132	581392	316354	661312	501471	356637	276071
Q15121	PEA15	Astrocytic phosphoprotein PEA-15	0.0363128	0.545556	0.168083	-0.8742	0.7745	0	0.530148	1.49935e+06	794875	1.8907e+06	1107997	877444	712306
Q7L266	ASRGL1	Isoaspartyl peptidase/L-asparaginase	0.0027933	0.545708	0.101007	-0.8738	0.9957	0	0.548173	448721	245977	391304	506138	286219	205734
P48739	PITPNB	Phosphatidylinositol transfer protein beta isoform	0.0851955	0.546502	0.0806337	-0.8717	1.093	0	0.544858	1.42628e+07	7.77122e+06	1.61907e+07	1.2335e+07	8.70038e+06	6.84206e+06
P04632	CAPNS1	Calpain small subunit 1	0.0865922	0.546768	0.0185172	-0.871	1.732	0	0.548555	4.58452e+06	2.51486e+06	4.50785e+06	4.66119e+06	2.72241e+06	2.30731e+06
Q7L523	RRAGA	Ras-related GTP-binding protein A	0.00558659	0.546919	0.262742	-0.8706	0.5805	0	0.585038	3.1773e+06	1.85884e+06	2.93105e+06	3.42355e+06	1.18072e+06	2.53697e+06
Q16539	MAPK14	Mitogen-activated protein kinase 14	0.00698324	0.547071	0.0941487	-0.8702	1.026	0	0.536675	3.7998e+06	2.03926e+06	4.54387e+06	3.05574e+06	1.97885e+06	2.09967e+06
Q9HCM4	EPB41L5	Band 4.1-like protein 5	0.0125698	0.547261	0.0222521	-0.8697	1.653	0	0.545481	8.26716e+06	4.50958e+06	8.96286e+06	7.57146e+06	4.66732e+06	4.35184e+06
Q9UL15	BAG5	BAG family molecular chaperone regulator 5	0.0209497	0.548932	0.0216371	-0.8653	1.665	0	0.546737	1.62495e+06	888420	1.47811e+06	1.77179e+06	882762	894078
Q9UMR2	DDX19B	ATP-dependent RNA helicase DDX19B	0.0907821	0.54897	0.0844007	-0.8652	1.074	0	0.544944	1.63926e+06	893303	1.89873e+06	1.37979e+06	978323	808284
Q9UQ16	DNM3	Dynamin-3	0.0782123	0.549275	0.285602	-0.8644	0.5442	0	0.563849	744891	420006	922578	567204	284031	555981
Q99504	EYA3	Eyes absent homolog 3	0.0935754	0.549656	0.354118	-0.8634	0.4509	0	0.618117	4.70583e+06	2.90875e+06	4.48397e+06	4.92769e+06	1.56528e+06	4.25222e+06
Q12765	SCRN1	Secernin-1	0.0209497	0.549732	0.0810923	-0.8632	1.091	0	0.548354	6.55704e+06	3.59558e+06	7.45175e+06	5.66233e+06	4.01981e+06	3.17134e+06
Q969X5	ERGIC1	Endoplasmic reticulum-Golgi intermediate compartment protein 1	0.00418994	0.550266	0.134488	-0.8618	0.8713	0	0.564736	3.22039e+06	1.81867e+06	3457383	2.98341e+06	1.40371e+06	2.23363e+06
Q2NKX8	ERCC6L	DNA excision repair protein ERCC-6-like	0.0865922	0.55122	0.38719	-0.8593	0.4121	0	0.635401	3.3086e+06	2.10229e+06	3.26627e+06	3.35093e+06	1.06153e+06	3.14305e+06
L0R6Q1	SLC35A4	SLC35A4 upstream open reading frame protein	0.00139665	0.551258	0.298236	-0.8592	0.5254	0	0.594227	821146	487947	724907	917384	678051	297842
Q9NZQ3	NCKIPSD	NCK-interacting protein with SH3 domain	0.0125698	0.551258	0.458599	-0.8592	0.3386	0	0.673787	1.08483e+06	730947	1.1046e+06	1.06507e+06	310770	1.15112e+06
P36551	CPOX	Oxygen-dependent coproporphyrinogen-III oxidase, mitochondrial	0.0558659	0.551335	0.259147	-0.859	0.5865	0	0.539408	1.36765e+07	7.37723e+06	1.77493e+07	9.60372e+06	5.72285e+06	9.0316e+06
Q9UGV2	NDRG3	Protein NDRG3	0.0418994	0.552444	0.10637	-0.8561	0.9732	0	0.551463	6.46637e+06	3.56596e+06	7.4606e+06	5.47214e+06	3.06183e+06	4.0701e+06
O96005	CLPTM1	Putative lipid scramblase CLPTM1	0.0167598	0.552559	0.0829781	-0.8558	1.081	0	0.548598	4.44876e+06	2.44058e+06	5.1078e+06	3.78972e+06	2.18523e+06	2.69593e+06
Q14019	COTL1	Coactosin-like protein	0.0153631	0.553019	0.390805	-0.8546	0.408	0	0.595325	2.25014e+06	1.33957e+06	1.65784e+06	2.84244e+06	1.93167e+06	747469
P30825	SLC7A1	High affinity cationic amino acid transporter 1	0.00558659	0.555016	0.00508293	-0.8494	2.294	0	0.555178	553313	307188	531723	574903	312048	302327
Q99805	TM9SF2	Transmembrane 9 superfamily member 2	0.00139665	0.555978	0.171853	-0.8469	0.7648	0	0.541406	1.07415e+06	581551	1.34336e+06	804940	512803	650299
Q8WX92	NELFB	Negative elongation factor B	0.0656425	0.556017	0.250552	-0.8468	0.6011	0	0.521055	3.38858e+06	1.76564e+06	4.57936e+06	2.19781e+06	1.77184e+06	1.75944e+06
Q13423	NNT	NAD(P) transhydrogenase, mitochondrial	0.0460894	0.556055	0.282958	-0.8467	0.5483	0	0.529322	1.65399e+07	8.75492e+06	2.22593e+07	1.08204e+07	7.22671e+06	1.02831e+07
Q9Y6D9	MAD1L1	Mitotic spindle assembly checkpoint protein MAD1	0.0139665	0.556248	0.21134	-0.8462	0.675	0	0.581252	2.22064e+06	1.29075e+06	2.01608e+06	2.42519e+06	904458	1.67704e+06
O00217	NDUFS8	NADH dehydrogenase [ubiquinone] iron-sulfur protein 8, mitochondrial	0.0586592	0.557792	0.235472	-0.8422	0.6281	0	0.589141	7.86272e+06	4.63225e+06	8.41079e+06	7.31465e+06	3.11143e+06	6.15307e+06
Q8TEU7	RAPGEF6	Rap guanine nucleotide exchange factor 6	0.0949721	0.558798	0.400561	-0.8396	0.3973	0	0.643615	774083	498211	816793	731373	250176	746246
P30740	SERPINB1	Leukocyte elastase inhibitor	0.023743	0.559574	0.329145	-0.8376	0.4826	0	0.566372	2.285e+06	1294160	2.94976e+06	1.62023e+06	870300	1.71802e+06
Q9BRA2	TXNDC17	Thioredoxin domain-containing protein 17	0.0698324	0.560933	0.197313	-0.8341	0.7048	0	0.578453	7.68309e+06	4.44431e+06	6.73429e+06	8631895	5.6445e+06	3.24411e+06
Q9NX55	HYPK	Huntingtin-interacting protein K	0.0363128	0.561439	0.247144	-0.8328	0.6071	0	0.558951	5.53699e+06	3.0949e+06	4118083	6.95589e+06	3.83272e+06	2.35709e+06
P63218	GNG5	Guanine nucleotide-binding protein G(I)/G(S)/G(O) subunit gamma-5	0.0502793	0.561555	0.444368	-0.8325	0.3523	0	0.654213	6734381	4.40572e+06	5706885	7761877	6.74608e+06	2.06536e+06
P61966	AP1S1	AP-1 complex subunit sigma-1A	0.00558659	0.561828	0.427871	-0.8318	0.3687	0	0.620629	2.95354e+06	1.83305e+06	3.68472e+06	2.22236e+06	948105	2.718e+06
P30085	CMPK1	UMP-CMP kinase	0.0251397	0.561945	0.0111894	-0.8315	1.951	0	0.563134	8.45635e+06	4.76206e+06	8.52028e+06	8.39241e+06	5.05471e+06	4.46941e+06
Q9NRV9	HEBP1	Heme-binding protein 1	0.0139665	0.562139	0.155602	-0.831	0.808	0	0.547337	4.27688e+06	2.3409e+06	5.31772e+06	3.23603e+06	2.51049e+06	2.1713e+06
O00399	DCTN6	Dynactin subunit 6	0.0195531	0.562256	0.294421	-0.8307	0.531	0	0.519159	775205	402454	476906	1.0735e+06	376535	428373
A8MXV4	NUDT19	Acyl-coenzyme A diphosphatase NUDT19	0.023743	0.562412	0.198821	-0.8303	0.7015	0	0.560495	2.07641e+06	1.16381e+06	2.52979e+06	1.62302e+06	926002	1.40163e+06
Q8IWD4	CCDC117	Coiled-coil domain-containing protein 117	0.00418994	0.562568	0.0124523	-0.8299	1.905	0	0.561267	380933	213805	404179	357687	209000	218611
Q9BZG8	DPH1	2-(3-amino-3-carboxypropyl)histidine synthase subunit 1	0	0.562763	0.0868112	-0.8294	1.061	0	0.555799	486531	270414	569554	403509	254793	286035
O60645	EXOC3	Exocyst complex component 3	0.0321229	0.562841	0.206317	-0.8292	0.6855	0	0.588871	4.56948e+06	2.69083e+06	4.81834e+06	4.32062e+06	1.89056e+06	3.49111e+06
Q13057	COASY	Bifunctional coenzyme A synthase	0.0796089	0.563466	0.0272463	-0.8276	1.565	0	0.566665	2.03438e+06	1.15281e+06	2.12329e+06	1.94547e+06	1.25382e+06	1.05181e+06
Q9Y2V2	CARHSP1	Calcium-regulated heat-stable protein 1	0.0418994	0.564482	0.0562378	-0.825	1.25	0	0.566648	2.20266e+06	1.24813e+06	2.07237e+06	2.33294e+06	1.41119e+06	1.08507e+06
O75438	NDUFB1	NADH dehydrogenase [ubiquinone] 1 beta subcomplex subunit 1	0	0.564521	0.0877192	-0.8249	1.057	0	0.563959	2.09173e+06	1.17965e+06	2.37704e+06	1.80643e+06	1.03682e+06	1.32248e+06
O94925	GLS	Glutaminase kidney isoform, mitochondrial	0.075419	0.56456	0.204029	-0.8248	0.6903	0	0.576256	9.24479e+06	5.32737e+06	1.07086e+07	7.78103e+06	3.95851e+06	6.69623e+06
Q9NXF7	DCAF16	DDB1- and CUL4-associated factor 16	0.00418994	0.565814	0.0653714	-0.8216	1.185	0	0.571416	913026	521718	870154	955897	446050	597385
P08574	CYC1	Cytochrome c1, heme protein, mitochondrial	0.0265363	0.566874	0.268144	-0.8189	0.5716	0	0.545341	6.92545e+06	3.77673e+06	9.13941e+06	4.7115e+06	3131441	4.42203e+06
Q92905	COPS5	COP9 signalosome complex subunit 5	0.0586592	0.567031	0.0321956	-0.8185	1.492	0	0.564568	1.05275e+07	5.94351e+06	1.15888e+07	9.46632e+06	6.09067e+06	5796348
Q9H4L7	SMARCAD1	SWI/SNF-related matrix-associated actin-dependent regulator of chromatin subfamily A containing DEAD/H box 1	0.0628492	0.567267	0.143506	-0.8179	0.8431	0	0.580628	4.07804e+06	2.36782e+06	4.42577e+06	3.7303e+06	1.84119e+06	2.89446e+06
Q16656	NRF1	Nuclear respiratory factor 1	0.00139665	0.567897	0.301177	-0.8163	0.5212	0	0.60566	1.36618e+06	827441	1.1817e+06	1.55066e+06	521856	1.13303e+06
Q9UBQ7	GRHPR	Glyoxylate reductase/hydroxypyruvate reductase	0.0502793	0.568803	0.133531	-0.814	0.8744	0	0.578367	1.74539e+07	1.00947e+07	1.55848e+07	1.93229e+07	1.21414e+07	8.04805e+06
Q96I15	SCLY	Selenocysteine lyase	0.00139665	0.569079	0.00599409	-0.8133	2.222	0	0.569575	888486	506059	900633	876338	527268	484850
P99999	CYCS	Cytochrome c	0.0949721	0.569118	0.127312	-0.8132	0.8951	0	0.581717	3.69545e+07	2.14971e+07	3.50717e+07	3.88373e+07	2.60898e+07	1.69043e+07
P48449	LSS	Lanosterol synthase	0.0181564	0.569394	0.477717	-0.8125	0.3208	0	0.599528	3.07792e+06	1.8453e+06	4.23085e+06	1.92499e+06	968033	2.72257e+06
P13693	TPT1	Translationally-controlled tumor protein	0.0907821	0.569473	0.0639496	-0.8123	1.194	0	0.563105	5.72562e+07	3.22412e+07	6.56666e+07	4.88458e+07	3.16631e+07	3.28194e+07
Q12907	LMAN2	Vesicular integral-membrane protein VIP36	0.0307263	0.570342	0.0444121	-0.8101	1.352	0	0.5728	6.06193e+06	3.47227e+06	6.42183e+06	5.70202e+06	3.10261e+06	3.84194e+06
Q9BX68	HINT2	Adenosine 5'-monophosphoramidase HINT2	0.0153631	0.570936	0.196711	-0.8086	0.7062	0	0.587644	5.28655e+06	3.10661e+06	4658236	5.91486e+06	3.92049e+06	2.29273e+06
P42126	ECI1	Enoyl-CoA delta isomerase 1, mitochondrial	0.0949721	0.570936	0.229559	-0.8086	0.6391	0	0.590022	1.2743e+07	7.51864e+06	1.09209e+07	1.45651e+07	9.66253e+06	5.37476e+06
Q8N5N7	MRPL50	39S ribosomal protein L50, mitochondrial	0.0488827	0.571213	0.247105	-0.8079	0.6071	0	0.573379	7.06529e+06	4.05109e+06	5.42232e+06	8.70827e+06	3.05344e+06	5.04874e+06
Q9Y2B0	CNPY2	Protein canopy homolog 2	0.0670391	0.571886	0.183573	-0.8062	0.7362	0	0.580594	8.54486e+06	4.96109e+06	7.26461e+06	9.8251e+06	6.10666e+06	3.81553e+06
Q9P0J0	NDUFA13	NADH dehydrogenase [ubiquinone] 1 alpha subcomplex subunit 13	0.0153631	0.572283	0.229846	-0.8052	0.6386	0	0.600989	1.50584e+07	9.04995e+06	1.62047e+07	1.39121e+07	6.25405e+06	1.18459e+07
Q9NVH6	TMLHE	Trimethyllysine dioxygenase, mitochondrial	0.00558659	0.573196	0.455958	-0.8029	0.3411	0	0.621245	1.22304e+06	759808	1.5984e+06	847677	398418	1.1212e+06
Q7RTS9	DYM	Dymeclin	0	0.573872	0.414947	-0.8012	0.382	0	0.519415	84167874	43718098	45130284	123205464	52815132	34621064
Q9HCN8	SDF2L1	Stromal cell-derived factor 2-like protein 1	0.0405028	0.573951	0.21725	-0.801	0.663	0	0.603014	1.64449e+06	991654	1.64071e+06	1.64828e+06	690605	1.2927e+06
Q7L7X3	TAOK1	Serine/threonine-protein kinase TAO1	0.0027933	0.57419	0.340595	-0.8004	0.4678	0	0.628844	7.32374e+06	4.60549e+06	7.91216e+06	6.73531e+06	2.69787e+06	6.51311e+06
Q9NNW5	WDR6	WD repeat-containing protein 6	0.0167598	0.574309	0.204776	-0.8001	0.6887	0	0.572795	2.15808e+07	1.23614e+07	1.69994e+07	2.61622e+07	1.4863e+07	9.85971e+06
Q13395	TARBP1	Probable methyltransferase TARBP1	0.023743	0.574668	0.214069	-0.7992	0.6694	0	0.550306	2.67721e+06	1.47329e+06	3.4757e+06	1878734	1.45213e+06	1.49444e+06
Q16740	CLPP	ATP-dependent Clp protease proteolytic subunit, mitochondrial	0.047486	0.574747	0.0405846	-0.799	1.392	0	0.577261	3.76705e+06	2.17457e+06	3.91052e+06	3.62358e+06	2.41276e+06	1.93638e+06
Q96K76	USP47	Ubiquitin carboxyl-terminal hydrolase 47	0.0181564	0.575066	0.193289	-0.7982	0.7138	0	0.578079	2.14894e+06	1.24225e+06	2.558e+06	1.73987e+06	981598	1.50291e+06
P28702	RXRB	Retinoic acid receptor RXR-beta	0.00558659	0.575425	0.325712	-0.7973	0.4872	0	0.532517	249957	133106	347478	152436	148298	117915
Q9NVJ2	ARL8B	ADP-ribosylation factor-like protein 8B	0.0628492	0.575465	0.0354178	-0.7972	1.451	0	0.578441	4.61508e+06	2.66955e+06	4.70236e+06	4.52779e+06	2.38949e+06	2.94961e+06
Q16222	UAP1	UDP-N-acetylhexosamine pyrophosphorylase	0.0153631	0.575664	0.0536837	-0.7967	1.27	0	0.570547	6.94236e+06	3.96094e+06	7.86273e+06	6.02198e+06	3.95144e+06	3.97044e+06
Q15750	TAB1	TGF-beta-activated kinase 1 and MAP3K7-binding protein 1	0.0893855	0.576024	0.302894	-0.7958	0.5187	0	0.622023	4.61633e+06	2.87146e+06	4.64768e+06	4.58498e+06	1.77769e+06	3.96523e+06
Q14849	STARD3	StAR-related lipid transfer protein 3	0.00139665	0.576104	0.195337	-0.7956	0.7092	0	0.593851	846764	502852	758237	935292	371204	634499
Q8NGA1	OR1M1	Olfactory receptor 1M1	0	0.576383	0.312129	-0.7949	0.5057	0	0.606495	1.16972e+06	709427	966410	1.37302e+06	962063	456791
P54646	PRKAA2	5'-AMP-activated protein kinase catalytic subunit alpha-2	0.0167598	0.576783	0.214855	-0.7939	0.6679	0	0.594026	1.89062e+06	1.12308e+06	2.1515e+06	1.62974e+06	821499	1.42466e+06
P61457	PCBD1	Pterin-4-alpha-carbinolamine dehydratase	0.0907821	0.578104	0.0905266	-0.7906	1.043	0	0.587044	4.12782e+06	2.42321e+06	4.10742e+06	4.14822e+06	2.84587e+06	2.00055e+06
Q16204	CCDC6	Coiled-coil domain-containing protein 6	0.0558659	0.578224	0.0919257	-0.7903	1.037	0	0.587187	5.53644e+06	3.25092e+06	5410107	5.66277e+06	2.68244e+06	3.81941e+06
Q86WG5	SBF2	Myotubularin-related protein 13	0.00837989	0.578384	0.138832	-0.7899	0.8575	0	0.593602	733941	435669	748002	719880	337888	533449
Q5VWZ2	LYPLAL1	Lysophospholipase-like protein 1	0.0209497	0.579146	0.459501	-0.788	0.3377	0	0.672609	3.0704e+06	2.06518e+06	3.52383e+06	2.61696e+06	981512	3.14884e+06
Q14738	PPP2R5D	Serine/threonine-protein phosphatase 2A 56 kDa regulatory subunit delta isoform	0.0879888	0.579628	0.309476	-0.7868	0.5094	0	0.621331	2.8131e+06	1.74787e+06	3.12678e+06	2.49941e+06	1.10198e+06	2.39375e+06
P27449	ATP6V0C	V-type proton ATPase 16 kDa proteolipid subunit c	0.00837989	0.579709	0.153014	-0.7866	0.8153	0	0.58533	1.21973e+06	713944	1.38561e+06	1.05385e+06	852540	575347
Q9BRT3	MIEN1	Migration and invasion enhancer 1	0.00418994	0.579829	0.238837	-0.7863	0.6219	0	0.61052	610313	372608	589329	631298	489830	255387
O76071	CIAO1	Probable cytosolic iron-sulfur protein assembly protein CIAO1	0.0167598	0.57999	0.272681	-0.7859	0.5643	0	0.611863	719464	440213	644535	794392	292538	587889
O60499	STX10	Syntaxin-10	0	0.580151	0.0179702	-0.7855	1.745	0	0.58148	238956	138948	234572	243340	129222	148674
O95394	PGM3	Phosphoacetylglucosamine mutase	0.051676	0.580191	0.239741	-0.7854	0.6203	0	0.596174	1.96941e+07	1.17411e+07	2.2863e+07	1.65253e+07	8.4817e+06	1.50006e+07
Q92530	PSMF1	Proteasome inhibitor PI31 subunit	0.0223464	0.580875	0.248285	-0.7837	0.605	0	0.612338	1.26526e+07	7.74764e+06	1.3546e+07	1.17591e+07	5.2728e+06	1.02225e+07
P30626	SRI	Sorcin	0.0977654	0.584348	0.127444	-0.7751	0.8947	0	0.593279	11370108	6.74564e+06	1.05277e+07	1.22125e+07	8.06801e+06	5.42328e+06
Q15819	UBE2V2	Ubiquitin-conjugating enzyme E2 variant 2	0.0879888	0.584915	0.128705	-0.7737	0.8904	0	0.597004	1.98596e+07	1.18563e+07	1.89917e+07	2.07275e+07	1.43054e+07	9.40717e+06
Q9Y673	ALG5	Dolichyl-phosphate beta-glucosyltransferase	0.0181564	0.585037	0.22872	-0.7734	0.6407	0	0.564279	2.19996e+06	1.24139e+06	2.83467e+06	1565248	1.11022e+06	1.37256e+06
P21266	GSTM3	Glutathione S-transferase Mu 3	0.0837989	0.585118	0.272522	-0.7732	0.5646	0	0.548506	2.46707e+07	1.3532e+07	3.31199e+07	1.62214e+07	1.33617e+07	1.37023e+07
Q5U5X0	LYRM7	Complex III assembly factor LYRM7	0.00418994	0.585199	0.202804	-0.773	0.6929	0	0.604864	2.47305e+06	1.49586e+06	2.23915e+06	2.70696e+06	1.89097e+06	1100754
Q9Y263	PLAA	Phospholipase A-2-activating protein	0.0391061	0.586377	0.393376	-0.7701	0.4052	0	0.659474	4.499e+06	2.96698e+06	4.34503e+06	4.65297e+06	1.61296e+06	4.32099e+06
Q9P0U4	CXXC1	CXXC-type zinc finger protein 1	0.00837989	0.586499	0.265761	-0.7698	0.5755	0	0.616068	569404	350792	627139	511670	238009	463574
Q7KZN9	COX15	Cytochrome c oxidase assembly protein COX15 homolog	0.00698324	0.586783	0.156828	-0.7691	0.8046	0	0.60294	1.0616e+07	6.40082e+06	1.12515e+07	9.98059e+06	4.94005e+06	7.8616e+06
Q9NQP4	PFDN4	Prefoldin subunit 4	0.0586592	0.587353	0.237604	-0.7677	0.6241	0	0.603963	1162693	702224	992109	1.33328e+06	896112	508336
Q6UWP7	LCLAT1	Lysocardiolipin acyltransferase 1	0.0027933	0.587597	0.156465	-0.7671	0.8056	0	0.599871	3.22884e+06	1.93689e+06	3.48712e+06	2.97056e+06	1.50747e+06	2.36631e+06
Q9H7Z7	PTGES2	Prostaglandin E synthase 2	0.0405028	0.58772	0.199399	-0.7668	0.7003	0	0.581147	8.22795e+06	4.78165e+06	1.0033e+07	6.42294e+06	3.95976e+06	5.60354e+06
Q9BTW9	TBCD	Tubulin-specific chaperone D	0.0195531	0.589025	0.234047	-0.7636	0.6307	0	0.607469	3.83201e+06	2.32783e+06	4.32358e+06	3.34045e+06	1.67751e+06	2.97815e+06
Q92785	DPF2	Zinc finger protein ubi-d4	0.0614525	0.589066	0.289296	-0.7635	0.5387	0	0.56142	1.01183e+06	568062	1344457	679203	484946	651178
P42695	NCAPD3	Condensin-2 complex subunit D3	0.0349162	0.58927	0.127382	-0.763	0.8949	0	0.59847	7.35651e+06	4.40265e+06	7.98763e+06	6.72539e+06	3.57171e+06	5233592
Q9UNP9	PPIE	Peptidyl-prolyl cis-trans isomerase E	0.0349162	0.58976	0.0835301	-0.7618	1.078	0	0.583378	5.11904e+06	2.98633e+06	4.31862e+06	5.91946e+06	3.10969e+06	2.86298e+06
Q9Y3E0	GOLT1B	Vesicle transport protein GOT1B	0.00418994	0.589842	0.0109283	-0.7616	1.961	0	0.588908	340786	200691	356761	324811	194650	206733
P52888	THOP1	Thimet oligopeptidase	0.0642458	0.590374	0.326025	-0.7603	0.4867	0	0.559667	2.12077e+07	1.18693e+07	2.8863e+07	1.35523e+07	1.00153e+07	1.37232e+07
Q9Y5P4	CERT1	Ceramide transfer protein	0	0.590414	0.441627	-0.7602	0.3549	0	0.673769	744001	501285	656257	831745	253731	748839
Q99496	RNF2	E3 ubiquitin-protein ligase RING2	0.0935754	0.590455	0.0488823	-0.7601	1.311	0	0.590386	1.942e+06	1.14653e+06	2.11193e+06	1.77207e+06	1.05102e+06	1.24204e+06
Q92696	RABGGTA	Geranylgeranyl transferase type-2 subunit alpha	0.0167598	0.590578	0.265801	-0.7598	0.5754	0	0.623752	4.67094e+06	2.91351e+06	4.91752e+06	4.42436e+06	1.95984e+06	3.86718e+06
O95298	NDUFC2	NADH dehydrogenase [ubiquinone] 1 subunit C2	0.0139665	0.590619	0.283013	-0.7597	0.5482	0	0.606062	1.85567e+06	1.12465e+06	2.21332e+06	1.49802e+06	791993	1.45731e+06
Q14696	MESD	LRP chaperone MESD	0.0488827	0.590824	0.226987	-0.7592	0.644	0	0.613018	2.44838e+06	1.5009e+06	2.19588e+06	2.70088e+06	1.92227e+06	1.07953e+06
Q08379	GOLGA2	Golgin subfamily A member 2	0.099162	0.590988	0.260271	-0.7588	0.5846	0	0.621737	7.69695e+06	4.78548e+06	7.13409e+06	8.25982e+06	3.26139e+06	6.30956e+06
Q4VC31	MIX23	Protein MIX23	0.0195531	0.591316	0.374883	-0.758	0.4261	0	0.619283	3.27649e+06	2.02907e+06	2487476	4.0655e+06	2.78627e+06	1.27187e+06
Q9HB90	RRAGC	Ras-related GTP-binding protein C	0.00418994	0.591684	0.11719	-0.7571	0.9311	0	0.6014	3.27444e+06	1.96925e+06	3.10154e+06	3.44734e+06	1.59852e+06	2.33998e+06
Q08257	CRYZ	Quinone oxidoreductase	0.0488827	0.591972	0.00862819	-0.7564	2.064	0	0.59294	3.7259e+06	2.20923e+06	3.65637e+06	3.79543e+06	2.3124e+06	2.10607e+06
Q93050	ATP6V0A1	V-type proton ATPase 116 kDa subunit a 1	0.00837989	0.592136	0.377621	-0.756	0.4229	0	0.610103	3.62539e+06	2.21186e+06	4.5982e+06	2.65257e+06	1.41657e+06	3.00715e+06
Q16881	TXNRD1	Thioredoxin reductase 1, cytoplasmic	0.0712291	0.593204	0.0734357	-0.7534	1.134	0	0.599958	8.45856e+06	5.07479e+06	8.47862e+06	8.4385e+06	5.82637e+06	4.3232e+06
Q96K17	BTF3L4	Transcription factor BTF3 homolog 4	0.0139665	0.59378	0.00962221	-0.752	2.017	0	0.593763	1.07373e+07	6.37542e+06	1.02028e+07	1.12718e+07	6.34478e+06	6.40605e+06
Q9H2V7	SPNS1	Protein spinster homolog 1	0.0195531	0.59378	0.397205	-0.752	0.401	0	0.661849	1.0882e+06	720223	1.18761e+06	988786	398679	1.04177e+06
Q96P16	RPRD1A	Regulation of nuclear pre-mRNA domain-containing protein 1A	0.0796089	0.594027	0.362213	-0.7514	0.441	0	0.583563	1.87611e+06	1.09483e+06	2497107	1.25512e+06	794034	1.39563e+06
Q9UI36	DACH1	Dachshund homolog 1	0.0600559	0.594109	0.34278	-0.7512	0.465	0	0.646031	1.29714e+06	837990	1.35339e+06	1.24088e+06	504727	1.17125e+06
Q9BVL4	SELENOO	Protein adenylyltransferase SelO, mitochondrial	0.00139665	0.594686	0.364868	-0.7498	0.4379	0	0.554451	324810	180091	452584	197035	151339	208842
P04156	PRNP	Major prion protein	0.00139665	0.59481	0.204109	-0.7495	0.6901	0	0.582781	938888	547167	715115	1.16266e+06	623109	471224
Q9BUK6	MSTO1	Protein misato homolog 1	0.00558659	0.595883	0.179708	-0.7469	0.7454	0	0.614616	2.84402e+06	1.74798e+06	3.00824e+06	2.6798e+06	1.32104e+06	2.17492e+06
Q6NXR4	TTI2	TELO2-interacting protein 2	0.0027933	0.596254	0.0313433	-0.746	1.504	0	0.596815	304712	181857	318425	291000	166544	197170
Q96AY3	FKBP10	Peptidyl-prolyl cis-trans isomerase FKBP10	0.0740223	0.59642	0.0231634	-0.7456	1.635	0	0.598517	4.63131e+06	2.77192e+06	4.58798e+06	4.67464e+06	2.99406e+06	2.54977e+06
Q16836	HADH	Hydroxyacyl-coenzyme A dehydrogenase, mitochondrial	0.0963687	0.596461	0.092481	-0.7455	1.034	0	0.604377	1.70871e+07	1.0327e+07	1.65271e+07	1.7647e+07	8607145	1.20469e+07
P26885	FKBP2	Peptidyl-prolyl cis-trans isomerase FKBP2	0.00977654	0.596502	0.327002	-0.7454	0.4854	0	0.630422	2.55107e+06	1.60825e+06	2.15535e+06	2.94679e+06	2.17888e+06	1.03763e+06
Q6NUQ1	RINT1	RAD50-interacting protein 1	0.0111732	0.596751	0.171565	-0.7448	0.7656	0	0.609384	1.86312e+06	1.13535e+06	2.00268e+06	1.72356e+06	874613	1.39609e+06
Q8TDP1	RNASEH2C	Ribonuclease H2 subunit C	0.0153631	0.596957	0.0585936	-0.7443	1.232	0	0.591508	986412	583470	1.11276e+06	860066	600433	566507
Q9Y6R4	MAP3K4	Mitogen-activated protein kinase kinase kinase 4	0.00139665	0.597164	0.137167	-0.7438	0.8628	0	0.609383	779159	474806	812232	746085	376933	572678
Q9Y3L5	RAP2C	Ras-related protein Rap-2c	0.0293296	0.597164	0.441673	-0.7438	0.3549	0	0.654571	2.46507e+06	1.61356e+06	1.9164e+06	3.01374e+06	2.3505e+06	876628
Q9UPW0	FOXJ3	Forkhead box protein J3	0.00418994	0.597247	0.110934	-0.7436	0.9549	0	0.60735	376475	228652	361535	391415	187172	270132
P11216	PYGB	Glycogen phosphorylase, brain form	0.099162	0.59733	0.407452	-0.7434	0.3899	0	0.592002	1.95653e+07	1.15827e+07	2.63408e+07	1.27898e+07	7.80299e+06	1.53624e+07
Q5TC12	ATPAF1	ATP synthase mitochondrial F1 complex assembly factor 1	0.0125698	0.597371	0.0704766	-0.7433	1.152	0	0.600747	1.75203e+06	1.05253e+06	1.88499e+06	1.61907e+06	920721	1.18433e+06
Q9HC35	EML4	Echinoderm microtubule-associated protein-like 4	0.0963687	0.597496	0.237883	-0.743	0.6236	0	0.598654	7.45232e+06	4.46136e+06	9.01656e+06	5.88808e+06	3.47596e+06	5.44675e+06
O43819	SCO2	Protein SCO2 homolog, mitochondrial	0.0782123	0.597703	0.247941	-0.7425	0.6057	0	0.623826	5.74847e+06	3.58605e+06	6.26048e+06	5.23646e+06	2.52417e+06	4.64792e+06
P80303	NUCB2	Nucleobindin-2	0.047486	0.598449	0.204736	-0.7407	0.6888	0	0.597444	7.48592e+06	4.47242e+06	6.00288e+06	8.96895e+06	5.31298e+06	3.63185e+06
P38570	ITGAE	Integrin alpha-E	0.0027933	0.598615	0.0268537	-0.7403	1.571	0	0.600074	853493	512159	819956	887030	473276	551042
Q5T653	MRPL2	39S ribosomal protein L2, mitochondrial	0.0600559	0.598781	0.165531	-0.7399	0.7811	0	0.59455	9.18797e+06	5462709	7420178	1.09558e+07	4.72255e+06	6.20287e+06
Q7L5D6	GET4	Golgi to ER traffic protein 4 homolog	0.0418994	0.59903	0.481251	-0.7393	0.3176	0	0.673664	1.62342e+06	1.09364e+06	2.00109e+06	1.24574e+06	546636	1.64064e+06
Q12955	ANK3	Ankyrin-3	0.0837989	0.599113	0.432476	-0.7391	0.364	0	0.652732	3.83184e+06	2.50117e+06	3.00037e+06	4.66331e+06	1.38844e+06	3.6139e+06
O00330	PDHX	Pyruvate dehydrogenase protein X component, mitochondrial	0.0740223	0.599695	0.201546	-0.7377	0.6956	0	0.620562	2.5424e+06	1.57771e+06	2.51228e+06	2.57251e+06	1.15768e+06	1.99775e+06
Q15404	RSU1	Ras suppressor protein 1	0.0586592	0.599819	0.222852	-0.7374	0.652	0	0.598285	4.36068e+06	2.60893e+06	3.45012e+06	5.27125e+06	3.12801e+06	2.08985e+06
P56211	ARPP19	cAMP-regulated phosphoprotein 19	0.0726257	0.599861	0.2041	-0.7373	0.6902	0	0.59881	377102	225813	304185	450020	269111	182514
O94826	TOMM70	Mitochondrial import receptor subunit TOM70	0.0307263	0.599944	0.0533242	-0.7371	1.273	0	0.597331	2.29299e+07	1.36968e+07	2.56155e+07	2.02443e+07	1.32448e+07	1.41487e+07
Q9UHR4	BAIAP2L1	Brain-specific angiogenesis inhibitor 1-associated protein 2-like protein 1	0.0712291	0.599944	0.101221	-0.7371	0.9947	0	0.607148	1.87587e+06	1.13893e+06	1.97421e+06	1.77754e+06	1.32869e+06	949173
Q8WUW1	BRK1	Protein BRICK1	0.0209497	0.600485	0.0156534	-0.7358	1.805	0	0.603289	1.98635e+06	1.19834e+06	2.0766e+06	1.8961e+06	1.14381e+06	1.25288e+06
O15511	ARPC5	Actin-related protein 2/3 complex subunit 5	0.0558659	0.600651	0.158523	-0.7354	0.7999	0	0.603758	4.63214e+06	2.79669e+06	5.32811e+06	3936168	2.31091e+06	3.28248e+06
P82970	HMGN5	High mobility group nucleosome-binding domain-containing protein 5	0.0446927	0.601151	0.130331	-0.7342	0.885	0	0.596378	2.03212e+06	1.21191e+06	1.71096e+06	2353288	1.36512e+06	1.05871e+06
Q9UHY7	ENOPH1	Enolase-phosphatase E1	0.0139665	0.601235	0.134753	-0.734	0.8705	0	0.608538	2.34872e+06	1.42929e+06	2.12153e+06	2.57591e+06	1688526	1.17005e+06
Q9BYT8	NLN	Neurolysin, mitochondrial	0.0153631	0.601235	0.370326	-0.734	0.4314	0	0.601586	5.56935e+06	3.35044e+06	7.25999e+06	3.8787e+06	2.33364e+06	4.36724e+06
Q04446	GBE1	1,4-alpha-glucan-branching enzyme	0.0251397	0.60136	0.37953	-0.7337	0.4208	0	0.608652	7.94388e+06	4.83505e+06	1.02823e+07	5.60542e+06	3.26267e+06	6.40744e+06
Q8NFV4	ABHD11	Protein ABHD11	0.0125698	0.601401	0.418615	-0.7336	0.3782	0	0.584877	2.11228e+06	1.23543e+06	2.9039e+06	1.32066e+06	860497	1610355
Q9Y2R0	COA3	Cytochrome c oxidase assembly factor 3 homolog, mitochondrial	0.0349162	0.601526	0.195549	-0.7333	0.7087	0	0.610045	5.53422e+06	3.37612e+06	6.34034e+06	4.72811e+06	2.64068e+06	4.11157e+06
P51809	VAMP7	Vesicle-associated membrane protein 7	0.00698324	0.603238	0.253673	-0.7292	0.5957	0	0.612884	2.60679e+06	1.59766e+06	3.10513e+06	2.10845e+06	1.20397e+06	1.99135e+06
P11279	LAMP1	Lysosome-associated membrane glycoprotein 1	0.0432961	0.603866	0.0195257	-0.7277	1.709	0	0.604156	3.52246e+06	2.12811e+06	3.6779e+06	3.36701e+06	2.24889e+06	2.00734e+06
Q8NEE6	FBXL13	Dynein regulatory complex subunit 6	0	0.604075	0.240294	-0.7272	0.6193	0	0.583133	1.06903e+07	6.23386e+06	1.36487e+07	7.73187e+06	6.94724e+06	5.52047e+06
P57081	WDR4	tRNA (guanine-N(7)-)-methyltransferase non-catalytic subunit WDR4	0	0.604201	0.209451	-0.7269	0.6789	0	0.621824	2.1353e+06	1.32778e+06	2.32171e+06	1.9489e+06	989338	1.66623e+06
Q92544	TM9SF4	Transmembrane 9 superfamily member 4	0.00418994	0.604243	0.144062	-0.7268	0.8415	0	0.608617	925637	563358	1.04673e+06	804539	468822	657895
P54709	ATP1B3	Sodium/potassium-transporting ATPase subunit beta-3	0.0768156	0.604452	0.0686401	-0.7263	1.163	0	0.599606	1.83183e+07	1.09838e+07	2.07778e+07	1.58588e+07	1.14006e+07	1.05669e+07
P42765	ACAA2	3-ketoacyl-CoA thiolase, mitochondrial	0.0684358	0.604536	0.25121	-0.7261	0.6	0	0.626107	1.19599e+07	7.4882e+06	1.33085e+07	1.06114e+07	5.35014e+06	9.62627e+06
Q06323	PSME1	Proteasome activator complex subunit 1	0.0963687	0.605291	0.2072	-0.7243	0.6836	0	0.617966	1.27227e+07	7.86221e+06	1.12036e+07	1.42418e+07	9.75871e+06	5.96571e+06
O95837	GNA14	Guanine nucleotide-binding protein subunit alpha-14	0.0377095	0.605333	0.10971	-0.7242	0.9598	0	0.61678	1.11115e+06	685335	1.06663e+06	1.15567e+06	805425	565245
Q9NYU2	UGGT1	UDP-glucose:glycoprotein glucosyltransferase 1	0.0963687	0.605417	0.437884	-0.724	0.3586	0	0.591127	1.83866e+07	1.08688e+07	2.53863e+07	1.13869e+07	7.36599e+06	1.43716e+07
Q9UPU5	USP24	Ubiquitin carboxyl-terminal hydrolase 24	0.0670391	0.606425	0.472476	-0.7216	0.3256	0	0.702829	4.5073e+06	3.16786e+06	4.8926e+06	4.12201e+06	1.55118e+06	4.78455e+06
Q8IYM0	FAM186B	Protein FAM186B	0	0.606509	0.363831	-0.7214	0.4391	0	0.580415	1.20729e+06	700728	1.63365e+06	780925	548797	852658
P12694	BCKDHA	2-oxoisovalerate dehydrogenase subunit alpha, mitochondrial	0.0907821	0.606719	0.374098	-0.7209	0.427	0	0.64899	2.09538e+06	1.35988e+06	2.43255e+06	1.7582e+06	833114	1.88664e+06
Q13404	UBE2V1	Ubiquitin-conjugating enzyme E2 variant 1	0.0949721	0.607055	0.231027	-0.7201	0.6363	0	0.597631	6.30023e+06	3.76521e+06	4804734	7.79573e+06	3.15018e+06	4.38024e+06
P51970	NDUFA8	NADH dehydrogenase [ubiquinone] 1 alpha subcomplex subunit 8	0.0488827	0.607224	0.0467388	-0.7197	1.33	0	0.610577	9.20015e+06	5.61741e+06	9.34231e+06	9.058e+06	4.99711e+06	6.2377e+06
Q9H1Y0	ATG5	Autophagy protein 5	0.00139665	0.607518	0.411216	-0.719	0.3859	0	0.636922	815320	519295	1.02191e+06	608729	318052	720538
P23434	GCSH	Glycine cleavage system H protein, mitochondrial	0.0125698	0.607982	0.325391	-0.7179	0.4876	0	0.650259	1.73013e+06	1.12503e+06	1.59655e+06	1.86371e+06	1.53145e+06	718620
Q6GMV2	SMYD5	Histone-lysine N-trimethyltransferase SMYD5	0.00837989	0.608235	0.135397	-0.7173	0.8684	0	0.613989	379313	232894	341255	417371	273674	192114
P20020	ATP2B1	Plasma membrane calcium-transporting ATPase 1	0.0921788	0.608361	0.266543	-0.717	0.5742	0	0.633066	9.17518e+06	5.80849e+06	10129863	8.22049e+06	4071595	7.54539e+06
Q7Z3B4	NUP54	Nucleoporin p54	0.0460894	0.608614	0.375659	-0.7164	0.4252	0	0.663362	3.92956e+06	2.60672e+06	4.29347e+06	3.56564e+06	1.54905e+06	3.66439e+06
Q6DD88	ATL3	Atlastin-3	0.00139665	0.609459	0.258848	-0.7144	0.587	0	0.604198	1.93696e+06	1.17031e+06	2.40091e+06	1.47301e+06	936077	1.40453e+06
Q9BRG1	VPS25	Vacuolar protein-sorting-associated protein 25	0.00977654	0.609501	0.284884	-0.7143	0.5453	0	0.591277	791535	468017	1.0215e+06	561571	390477	545556
Q96BD8	SKA1	Spindle and kinetochore-associated protein 1	0.0740223	0.609585	0.0171529	-0.7141	1.766	0	0.610162	275101	167856	275934	274268	178929	156783
Q6NXT1	ANKRD54	Ankyrin repeat domain-containing protein 54	0.00558659	0.610093	0.0599372	-0.7129	1.222	0	0.616355	1.93228e+06	1.19097e+06	1.93698e+06	1.92759e+06	1.04388e+06	1.33806e+06
P14859	POU2F1	POU domain, class 2, transcription factor 1	0.0111732	0.610643	0.377932	-0.7116	0.4226	0	0.669279	2.07122e+06	1.38622e+06	2.03785e+06	2.10459e+06	815386	1.95706e+06
Q9UPT9	USP22	Ubiquitin carboxyl-terminal hydrolase 22	0.0628492	0.61077	0.314808	-0.7113	0.502	0	0.599825	318688	191157	410176	227200	149125	233189
P30046	DDT	D-dopachrome decarboxylase	0.0796089	0.611024	0.193038	-0.7107	0.7144	0	0.621904	3.94487e+07	2.45333e+07	3.47715e+07	4.4126e+07	3.00079e+07	1.90588e+07
Q8IXM2	BAP18	Chromatin complexes subunit BAP18	0.0684358	0.611193	0.0516423	-0.7103	1.287	0	0.612526	823205	504234	766127	880283	551227	457242
Q9UBI1	COMMD3	COMM domain-containing protein 3	0.00418994	0.611363	0.0635932	-0.7099	1.197	0	0.614671	2.26682e+06	1.39335e+06	2.34279e+06	2.19085e+06	1.21928e+06	1.56742e+06
P29597	TYK2	Non-receptor tyrosine-protein kinase TYK2	0.00418994	0.611786	0.0661797	-0.7089	1.179	0	0.616345	310255	191224	297420	323091	167146	215303
P50995	ANXA11	Annexin A11	0.0768156	0.612168	0.120079	-0.708	0.9205	0	0.620097	4.77947e+06	2.96374e+06	4.40851e+06	5.15043e+06	3464014	2.46346e+06
P11441	UBL4A	Ubiquitin-like protein 4A	0.0684358	0.613102	0.319797	-0.7058	0.4951	0	0.579726	2.33415e+06	1.35316e+06	3.12749e+06	1.5408e+06	1.20054e+06	1.50579e+06
Q9Y606	PUS1	Pseudouridylate synthase 1 homolog	0.0670391	0.613528	0.00856228	-0.7048	2.067	0	0.614105	8.56097e+06	5.25733e+06	8.38835e+06	8.73359e+06	5.04018e+06	5.47449e+06
Q86W92	PPFIBP1	Liprin-beta-1	0.0321229	0.614081	0.0796804	-0.7035	1.099	0	0.609175	3.16214e+06	1.9263e+06	3.56272e+06	2.76156e+06	1.7855e+06	2.06709e+06
Q9BYD6	MRPL1	39S ribosomal protein L1, mitochondrial	0.0600559	0.614336	0.0260814	-0.7029	1.584	0	0.611489	3.78204e+06	2.31268e+06	3480583	4.0835e+06	2.33527e+06	2.29009e+06
Q969V3	NCLN	BOS complex subunit NCLN	0.0572626	0.614549	0.213931	-0.7024	0.6697	0	0.634175	1.48875e+07	9.44128e+06	1.57701e+07	1.40048e+07	7.02441e+06	1.18581e+07
Q9UIA9	XPO7	Exportin-7	0.0670391	0.614933	0.0430094	-0.7015	1.366	0	0.616463	1.22927e+07	7.57802e+06	1.29926e+07	1.15929e+07	6.91818e+06	8.23787e+06
Q5JS54	PSMG4	Proteasome assembly chaperone 4	0	0.615444	0.119417	-0.7003	0.9229	0	0.620087	918311	569433	1.01581e+06	820806	484953	653912
Q9BRX8	PRXL2A	Peroxiredoxin-like 2A	0.0125698	0.615914	0.0615844	-0.6992	1.211	0	0.619284	2.75276e+06	1.70474e+06	2.65394e+06	2.85157e+06	1.91373e+06	1.49574e+06
Q96RU2	USP28	Ubiquitin carboxyl-terminal hydrolase 28	0.0824022	0.615914	0.18923	-0.6992	0.723	0	0.620283	716331	444328	825019	607644	358958	529698
O60888	CUTA	Protein CutA	0.0293296	0.616042	0.212764	-0.6989	0.6721	0	0.630397	2.3141e+06	1.4588e+06	2059870	2568339	1.8063e+06	1111305
O60568	PLOD3	Multifunctional procollagen lysine hydroxylase and glycosyltransferase LH3	0.0670391	0.616084	0.0229112	-0.6988	1.64	0	0.616597	1.31189e+06	808906	1.39632e+06	1.22746e+06	779053	838759
Q9Y2I1	NISCH	Nischarin	0.00977654	0.61617	0.264027	-0.6986	0.5784	0	0.63711	1.21063e+06	771302	1.06117e+06	1.36008e+06	554158	988445
P82921	MRPS21	28S ribosomal protein S21, mitochondrial	0.0726257	0.616341	0.478266	-0.6982	0.3203	0	0.715654	2.51408e+06	1.79921e+06	2.45176e+06	2.5764e+06	885849	2.71258e+06
Q6PD62	CTR9	RNA polymerase-associated protein CTR9 homolog	0.0921788	0.61664	0.569556	-0.6975	0.2445	0	0.775464	2.81545e+06	2.18328e+06	3.07078e+06	2.56011e+06	848746	3.51781e+06
Q8N4H5	TOMM5	Mitochondrial import receptor subunit TOM5 homolog	0.00139665	0.617196	0.301724	-0.6962	0.5204	0	0.581618	1.80311e+06	1.04872e+06	2.40781e+06	1198407	1.08003e+06	1.01741e+06
Q86Y56	DNAAF5	Dynein axonemal assembly factor 5	0.0209497	0.617495	0.128778	-0.6955	0.8902	0	0.626527	2.19177e+07	1.3732e+07	22808813	2.10267e+07	1.11755e+07	1.62886e+07
Q86Y82	STX12	Syntaxin-12	0.00139665	0.617966	0.141534	-0.6944	0.8491	0	0.618075	3.6201e+06	2.23749e+06	4.12063e+06	3.11956e+06	1.90991e+06	2.56508e+06
Q6IBW4	NCAPH2	Condensin-2 complex subunit H2	0.0125698	0.61848	0.322148	-0.6932	0.4919	0	0.641277	5.86028e+06	3.75806e+06	6866512	4.85404e+06	2.5801e+06	4.93602e+06
A2RRP1	NBAS	NBAS subunit of NRZ tethering complex	0.0195531	0.618781	0.518661	-0.6925	0.2851	0	0.704229	1.43755e+06	1.01236e+06	1.77807e+06	1.09703e+06	490084	1.53464e+06
Q86UV5	USP48	Ubiquitin carboxyl-terminal hydrolase 48	0.0796089	0.619424	0.17412	-0.691	0.7592	0	0.628744	878454	552323	969496	787412	439929	664716
P30533	LRPAP1	Alpha-2-macroglobulin receptor-associated protein	0.0432961	0.619682	0.424592	-0.6904	0.372	0	0.692283	775240	536685	796239	754241	776379	296992
P57737	CORO7	Coronin-7	0.0349162	0.61994	0.440195	-0.6898	0.3564	0	0.645398	5.15942e+06	3.32988e+06	6.60721e+06	3.71162e+06	2.04094e+06	4.61881e+06
Q15126	PMVK	Phosphomevalonate kinase	0.00139665	0.620155	0.583886	-0.6893	0.2337	0	0.651351	5.30271e+06	3.45393e+06	7.61451e+06	2.99092e+06	1.67132e+06	5.23654e+06
Q2VPK5	CTU2	Cytoplasmic tRNA 2-thiolation protein 2	0	0.620456	0.299159	-0.6886	0.5241	0	0.646554	1.80502e+06	1.16704e+06	2.0286e+06	1.58144e+06	806670	1.52741e+06
P61201	COPS2	COP9 signalosome complex subunit 2	0.0600559	0.620542	0.149074	-0.6884	0.8266	0	0.609963	1.26571e+07	7.72038e+06	1.02109e+07	1.51033e+07	7.18424e+06	8.25652e+06
P29144	TPP2	Tripeptidyl-peptidase 2	0.0824022	0.6208	0.100581	-0.6878	0.9975	0	0.613606	4.5288e+06	2.7789e+06	5.24209e+06	3.81551e+06	2.89806e+06	2.65975e+06
Q96H79	ZC3HAV1L	Zinc finger CCCH-type antiviral protein 1-like	0.0293296	0.620886	0.379767	-0.6876	0.4205	0	0.647423	3.68427e+06	2.38528e+06	4.48011e+06	2.88842e+06	1.55402e+06	3.21653e+06
P22059	OSBP	Oxysterol-binding protein 1	0.0181564	0.621144	0.170859	-0.687	0.7674	0	0.619417	9.91713e+06	6.14283e+06	1.15801e+07	8.25415e+06	5.22818e+06	7.05749e+06
O75489	NDUFS3	NADH dehydrogenase [ubiquinone] iron-sulfur protein 3, mitochondrial	0.0935754	0.621187	0.20928	-0.6869	0.6793	0	0.642038	2.30906e+07	1.4825e+07	2.42521e+07	2.19291e+07	1.11184e+07	1.85316e+07
Q00013	MPP1	55 kDa erythrocyte membrane protein	0.0195531	0.621273	0.0674942	-0.6867	1.171	0	0.626862	4.67368e+06	2.92975e+06	4.7628e+06	4.58456e+06	3.30459e+06	2.55491e+06
P43307	SSR1	Translocon-associated protein subunit alpha	0.0796089	0.621403	0.201515	-0.6864	0.6957	0	0.603693	9.1582e+06	5.52874e+06	6.93064e+06	1.13858e+07	5.80062e+06	5.25686e+06
O43808	SLC25A17	Peroxisomal membrane protein PMP34	0.00698324	0.621489	0.213355	-0.6862	0.6709	0	0.631416	3.77359e+06	2.3827e+06	4.3082e+06	3.23897e+06	1.86203e+06	2.90338e+06
O43427	FIBP	Acidic fibroblast growth factor intracellular-binding protein	0	0.621704	0.354615	-0.6857	0.4502	0	0.669024	1.1107e+06	743088	1.18364e+06	1.03777e+06	465161	1021015
Q9Y512	SAMM50	Sorting and assembly machinery component 50 homolog	0.0139665	0.622092	0.0835755	-0.6848	1.078	0	0.625768	1.25501e+07	7.85348e+06	1.34132e+07	1.16871e+07	6.83915e+06	8.86781e+06
Q9BRJ2	MRPL45	39S ribosomal protein L45, mitochondrial	0.0572626	0.623041	0.23648	-0.6826	0.6262	0	0.645637	7.78664e+06	5.02735e+06	7.24642e+06	8.32686e+06	3.68118e+06	6.37351e+06
Q96MT8	CEP63	Centrosomal protein of 63 kDa	0.00418994	0.624209	0.0386266	-0.6799	1.413	0	0.62108	755586	469280	684299	826873	464925	473634
P24468	NR2F2	COUP transcription factor 2	0.00558659	0.624945	0.312673	-0.6782	0.5049	0	0.656009	627813	411851	694132	561494	278695	545008
Q9NQW7	XPNPEP1	Xaa-Pro aminopeptidase 1	0.0195531	0.625031	0.41797	-0.678	0.3789	0	0.601181	1.44382e+07	8.67999e+06	1.97886e+07	9.08787e+06	6.51441e+06	1.08456e+07
Q9BY50	SEC11C	Signal peptidase complex catalytic subunit SEC11C	0	0.625161	0.432797	-0.6777	0.3637	0	0.602957	438531	264415	602278	274784	191699	337131
Q9HAB8	PPCS	Phosphopantothenate--cysteine ligase	0	0.625595	0.304135	-0.6767	0.5169	0	0.621626	641567	398815	481811	801324	488897	308733
Q6UVY6	MOXD1	DBH-like monooxygenase protein 1	0.00558659	0.625725	0.379997	-0.6764	0.4202	0	0.608	3.6777e+06	2.23604e+06	2.45704e+06	4.89835e+06	2.75967e+06	1.7124e+06
Q96LR5	UBE2E2	Ubiquitin-conjugating enzyme E2 E2	0.0307263	0.626028	0.374264	-0.6757	0.4268	0	0.60125	7.54069e+06	4.53384e+06	1.01155e+07	4.96586e+06	3.58981e+06	5.47787e+06
Q8WVB6	CHTF18	Chromosome transmission fidelity protein 18 homolog	0.0139665	0.626506	0.503844	-0.6746	0.2977	0	0.719966	1.8816e+06	1.35469e+06	2.16548e+06	1.59773e+06	668372	2.04101e+06
P49005	POLD2	DNA polymerase delta subunit 2	0.0195531	0.62694	0.251645	-0.6736	0.5992	0	0.648489	5.39346e+06	3.4976e+06	5.88129e+06	4.90563e+06	2.54854e+06	4.44667e+06
P54725	RAD23A	UV excision repair protein RAD23 homolog A	0.051676	0.627071	0.136996	-0.6733	0.8633	0	0.631381	2.96304e+06	1.87081e+06	2.62914e+06	3.29695e+06	2.16266e+06	1.57896e+06
O60493	SNX3	Sorting nexin-3	0.023743	0.627419	0.145244	-0.6725	0.8379	0	0.630637	7.90739e+06	4.98669e+06	6.95808e+06	8.85669e+06	5.77533e+06	4.19806e+06
Q6P996	PDXDC1	Pyridoxal-dependent decarboxylase domain-containing protein 1	0.0642458	0.627854	0.339696	-0.6715	0.4689	0	0.67128	2.08366e+06	1.39872e+06	2.15168e+06	2.01565e+06	900986	1.89646e+06
Q68CZ6	HAUS3	HAUS augmin-like complex subunit 3	0.0307263	0.628332	0.455943	-0.6704	0.3411	0	0.684013	1.28548e+06	879286	1.54462e+06	1.02635e+06	496700	1.26187e+06
O43665	RGS10	Regulator of G-protein signaling 10	0.00139665	0.628899	0.24615	-0.6691	0.6088	0	0.644938	546131	352221	481004	611258	441525	262916
Q9NTJ5	SACM1L	Phosphatidylinositol-3-phosphatase SAC1	0.0307263	0.629684	0.246928	-0.6673	0.6074	0	0.620314	1.09827e+07	6.81273e+06	1.3551e+07	8414424	5.76566e+06	7.85979e+06
P53041	PPP5C	Serine/threonine-protein phosphatase 5	0.0544693	0.629684	0.0471802	-0.6673	1.326	0	0.633109	1.82326e+07	1.15432e+07	1.69598e+07	1.95054e+07	1.2441e+07	1.06454e+07
Q96JJ7	TMX3	Protein disulfide-isomerase TMX3	0.023743	0.629728	0.182517	-0.6672	0.7387	0	0.638846	890373	568811	986960	793786	454878	682745
O95478	NSA2	Ribosome biogenesis protein NSA2 homolog	0.0502793	0.630077	0.0089551	-0.6664	2.048	0	0.630562	939206	592227	930523	947888	566715	617740
Q9BW92	TARS2	Threonine--tRNA ligase, mitochondrial	0.0251397	0.63047	0.324885	-0.6655	0.4883	0	0.660146	6.02597e+06	3.97802e+06	6.78101e+06	5.27093e+06	2.69985e+06	5.25619e+06
Q14376	GALE	UDP-glucose 4-epimerase	0	0.630776	0.508177	-0.6648	0.294	0	0.626807	922835	578439	1.28631e+06	559357	359603	797276
O94927	HAUS5	HAUS augmin-like complex subunit 5	0.0405028	0.630907	0.393464	-0.6645	0.4051	0	0.686373	2.28507e+06	1.56841e+06	2.11837e+06	2.45176e+06	943885	2.19293e+06
Q0VDF9	HSPA14	Heat shock 70 kDa protein 14	0.0377095	0.63117	0.204885	-0.6639	0.6885	0	0.633383	9.64241e+06	6.10733e+06	1.12148e+07	8.07e+06	4.98364e+06	7.23103e+06
P22307	SCP2	Sterol carrier protein 2	0.0628492	0.631257	0.0348935	-0.6637	1.457	0	0.633446	1.81458e+07	1.14944e+07	18440100	1.78515e+07	1.25018e+07	1.04869e+07
Q8N6H7	ARFGAP2	ADP-ribosylation factor GTPase-activating protein 2	0.047486	0.631301	0.11842	-0.6636	0.9266	0	0.641278	5.2217e+06	3.34856e+06	5.1498e+06	5.29359e+06	2.77342e+06	3.9237e+06
Q8TCS8	PNPT1	Polyribonucleotide nucleotidyltransferase 1, mitochondrial	0.0488827	0.632089	0.0753801	-0.6618	1.123	0	0.630467	1.39181e+07	8.7749e+06	1.25337e+07	1.53024e+07	9.54407e+06	8.00573e+06
O43674	NDUFB5	NADH dehydrogenase [ubiquinone] 1 beta subcomplex subunit 5, mitochondrial	0.00418994	0.632308	0.347971	-0.6613	0.4585	0	0.598257	1.35221e+06	808967	1.81433e+06	890080	706881	911054
Q96I99	SUCLG2	Succinate--CoA ligase [GDP-forming] subunit beta, mitochondrial	0.0530726	0.632659	0.162401	-0.6605	0.7894	0	0.641713	1.42171e+07	9.12327e+06	15284387	1.31498e+07	7.3579e+06	10888651
Q969H8	MYDGF	Myeloid-derived growth factor	0.0572626	0.632703	0.187862	-0.6604	0.7262	0	0.640119	7.05683e+06	4.51721e+06	6.18188e+06	7.93179e+06	5390637	3.64379e+06
P10644	PRKAR1A	cAMP-dependent protein kinase type I-alpha regulatory subunit	0.051676	0.633317	0.363946	-0.659	0.439	0	0.67171	1.22316e+06	821606	1093954	1.35236e+06	526746	1116465
Q32P28	P3H1	Prolyl 3-hydroxylase 1	0.0600559	0.633361	0.199375	-0.6589	0.7003	0	0.640146	3.55676e+06	2.27684e+06	4.00959e+06	3.10393e+06	1.81691e+06	2.73677e+06
Q86TI2	DPP9	Dipeptidyl peptidase 9	0.0139665	0.633976	0.609721	-0.6575	0.2149	0	0.549089	2.0742e+06	1.13892e+06	3.28648e+06	861922	745020	1.53282e+06
O00233	PSMD9	26S proteasome non-ATPase regulatory subunit 9	0.0181564	0.634108	0.118822	-0.6572	0.9251	0	0.634187	1.05937e+07	6.71839e+06	1.18914e+07	9.29599e+06	5.91177e+06	7.52501e+06
Q8N9N8	EIF1AD	Probable RNA-binding protein EIF1AD	0.0111732	0.634547	0.430101	-0.6562	0.3664	0	0.572521	735415	421041	418193	1.05264e+06	444041	398040
Q6VEQ5	WASH2P	WAS protein family homolog 2	0.00139665	0.635075	0.252779	-0.655	0.5973	0	0.65331	2.20578e+06	1.44106e+06	2.44764e+06	1.96391e+06	1073634	1.80848e+06
Q96HY7	DHTKD1	2-oxoadipate dehydrogenase complex component E1	0.0139665	0.635075	0.359386	-0.655	0.4444	0	0.628154	2.88352e+06	1.81129e+06	3.7056e+06	2.06143e+06	1.37098e+06	2.25161e+06
O75347	TBCA	Tubulin-specific chaperone A	0.0949721	0.635648	0.253869	-0.6537	0.5954	0	0.652785	5.49786e+07	3.58892e+07	4.87333e+07	6.12238e+07	4.50553e+07	2.6723e+07
P30043	BLVRB	Flavin reductase (NADPH)	0.023743	0.636089	0.177434	-0.6527	0.751	0	0.635539	6.83545e+06	4.3442e+06	5.74513e+06	7.92577e+06	5.00305e+06	3.68534e+06
Q9BXB4	OSBPL11	Oxysterol-binding protein-related protein 11	0.0726257	0.636309	0.508791	-0.6522	0.2935	0	0.699781	3.18426e+06	2.22829e+06	3.94853e+06	2.41999e+06	1180797	3.27578e+06
Q14746	COG2	Conserved oligomeric Golgi complex subunit 2	0.00139665	0.636397	0.333192	-0.652	0.4773	0	0.658527	1.0329e+06	680192	1.20883e+06	856971	474387	885996
Q96CW5	TUBGCP3	Gamma-tubulin complex component 3	0.0642458	0.636618	0.451416	-0.6515	0.3454	0	0.707515	4.60653e+06	3.25919e+06	5.01869e+06	4.19437e+06	1.80756e+06	4.71082e+06
Q9BUR5	APOO	MICOS complex subunit MIC26	0.00698324	0.636927	0.147654	-0.6508	0.8308	0	0.647796	532555	344987	555699	509411	410372	279602
Q92890	UFD1	Ubiquitin recognition factor in ER-associated degradation protein 1	0.0949721	0.637413	0.287848	-0.6497	0.5408	0	0.648113	1.6735e+06	1.08461e+06	1.96246e+06	1.38453e+06	807865	1.36136e+06
Q06546	GABPA	GA-binding protein alpha chain	0.0558659	0.637545	0.31349	-0.6494	0.5038	0	0.666617	1.59716e+06	1.0647e+06	1.42127e+06	1.77306e+06	735443	1.39395e+06
Q9BRK4	LZTS2	Leucine zipper putative tumor suppressor 2	0.0125698	0.63874	0.230747	-0.6467	0.6369	0	0.651755	5.7176e+06	3.72648e+06	5.0714e+06	6.3638e+06	4.59522e+06	2.85773e+06
Q92989	CLP1	Polyribonucleotide 5'-hydroxyl-kinase Clp1	0.0153631	0.638873	0.0251186	-0.6464	1.6	0	0.636906	1.53026e+06	974634	1.64151e+06	1.41902e+06	981603	967664
Q9UI26	IPO11	Importin-11	0.0879888	0.639005	0.268863	-0.6461	0.5705	0	0.657182	9.45667e+06	6.21475e+06	1.05435e+07	8.36988e+06	4.55953e+06	7.86998e+06
O95625	ZBTB11	Zinc finger and BTB domain-containing protein 11	0.023743	0.639094	0.32635	-0.6459	0.4863	0	0.60351	1.36626e+06	824553	913263	1.81926e+06	790951	858156
P08397	HMBS	Porphobilinogen deaminase	0.0139665	0.639448	0.0468124	-0.6451	1.33	0	0.637642	6.86736e+06	4.37891e+06	6.2809e+06	7.45381e+06	4.60945e+06	4.14838e+06
P62875	POLR2L	DNA-directed RNA polymerases I, II, and III subunit RPABC5	0.0446927	0.640069	0.349957	-0.6437	0.456	0	0.639702	2.22619e+06	1.4241e+06	2793633	1.65875e+06	1.05731e+06	1.79089e+06
Q9NNW7	TXNRD2	Thioredoxin reductase 2, mitochondrial	0.0027933	0.640336	0.24729	-0.6431	0.6068	0	0.642586	625460	401912	510892	740027	482521	321303
Q2TAL8	QRICH1	Transcriptional regulator QRICH1	0.0167598	0.640336	0.329812	-0.6431	0.4817	0	0.677089	5.26186e+06	3.56275e+06	4.87772e+06	5.646e+06	2.39122e+06	4.73428e+06
Q93034	CUL5	Cullin-5	0.0488827	0.640646	0.423094	-0.6424	0.3736	0	0.6121	5.94456e+06	3.63867e+06	8114755	3.77437e+06	2.823e+06	4.45433e+06
Q5T6V5	C9orf64	Queuosine salvage protein	0.00977654	0.640735	0.376791	-0.6422	0.4239	0	0.623574	1.12339e+07	7.00514e+06	1.47492e+07	7.71853e+06	5.4348e+06	8.57547e+06
P20073	ANXA7	Annexin A7	0.0740223	0.640913	0.286641	-0.6418	0.5427	0	0.644293	6.08823e+06	3.9226e+06	4.83888e+06	7.33757e+06	4.80095e+06	3.04425e+06
Q6ZMG9	CERS6	Ceramide synthase 6	0.00418994	0.641224	0.108488	-0.6411	0.9646	0	0.648895	1.45025e+06	941056	1.47077e+06	1.42972e+06	793454	1.08866e+06
P11717	IGF2R	Cation-independent mannose-6-phosphate receptor	0.0432961	0.641313	0.0715958	-0.6409	1.145	0	0.645153	1.09404e+07	7.05826e+06	1.14879e+07	1.03929e+07	6.24681e+06	7.8697e+06
Q9NX40	OCIAD1	OCIA domain-containing protein 1	0.0321229	0.64158	0.177922	-0.6403	0.7498	0	0.6535	722661	472259	770121	675201	375700	568818
P58557	YBEY	Endoribonuclease YbeY	0.00977654	0.641757	0.0534405	-0.6399	1.272	0	0.643663	757158	487355	793436	720879	440919	533790
O95071	UBR5	E3 ubiquitin-protein ligase UBR5	0.0614525	0.641757	0.563672	-0.6399	0.249	0	0.777076	1.16513e+07	9.05398e+06	1.23837e+07	1.0919e+07	3.9238e+06	1.41842e+07
P42345	MTOR	Serine/threonine-protein kinase mTOR	0.0153631	0.641935	0.279742	-0.6395	0.5532	0	0.670852	5.24224e+06	3.51677e+06	5.08271e+06	5.40177e+06	2.49215e+06	4.54138e+06
Q5ZPR3	CD276	CD276 antigen	0	0.643182	0.119523	-0.6367	0.9225	0	0.636131	429173	273010	496446	361900	257348	288673
O95208	EPN2	Epsin-2	0.00418994	0.643272	0.281113	-0.6365	0.5511	0	0.671178	189262	127028	175858	202666	90654.3	163402
Q9H4L5	OSBPL3	Oxysterol-binding protein-related protein 3	0.0027933	0.643495	0.222628	-0.636	0.6524	0	0.658015	480624	316258	528302	432947	244396	388120
O15514	POLR2D	DNA-directed RNA polymerase II subunit RPB4	0.0209497	0.644164	0.156531	-0.6345	0.8054	0	0.652378	277417	180981	257411	297423	148265	213696
Q13425	SNTB2	Beta-2-syntrophin	0.0363128	0.644655	0.00671535	-0.6334	2.173	0	0.645058	3.86037e+06	2.49016e+06	3.86231e+06	3.85843e+06	2.39847e+06	2.58186e+06
Q9H1D9	POLR3F	DNA-directed RNA polymerase III subunit RPC6	0.00698324	0.645013	0.473028	-0.6326	0.3251	0	0.72234	731045	528064	792983	669108	287387	768740
O00170	AIP	AH receptor-interacting protein	0.0544693	0.645415	0.0329774	-0.6317	1.482	0	0.646015	6.31771e+06	4.08134e+06	6.11365e+06	6.52177e+06	4.38647e+06	3.77621e+06
Q96IU4	ABHD14B	Putative protein-lysine deacylase ABHD14B	0.00418994	0.64555	0.00925097	-0.6314	2.034	0	0.644958	6.18459e+06	3.9888e+06	6.43181e+06	5.93737e+06	3.92529e+06	4.05232e+06
Q9Y3D6	FIS1	Mitochondrial fission 1 protein	0.0321229	0.646535	0.0627749	-0.6292	1.202	0	0.650934	2.3129e+06	1.50554e+06	2.39056e+06	2.23524e+06	1.34412e+06	1.66697e+06
Q86UA1	PRPF39	Pre-mRNA-processing factor 39	0.0530726	0.646624	0.358729	-0.629	0.4452	0	0.691536	1.72377e+06	1.19205e+06	1.77828e+06	1.66926e+06	771959	1.61215e+06
O75153	CLUH	Clustered mitochondria protein homolog	0.075419	0.646804	0.261759	-0.6286	0.5821	0	0.658208	1.81412e+07	1.19407e+07	2.09318e+07	1.53505e+07	9.15685e+06	1.47245e+07
Q15005	SPCS2	Signal peptidase complex subunit 2	0.023743	0.646938	0.519439	-0.6283	0.2845	0	0.737927	6.93988e+06	5.12113e+06	7.91303e+06	5.96674e+06	2581503	7.66075e+06
Q9H2U2	PPA2	Inorganic pyrophosphatase 2, mitochondrial	0.0921788	0.647028	0.0236096	-0.6281	1.627	0	0.645653	8.61965e+06	5.56531e+06	8.03871e+06	9.20058e+06	5.61846e+06	5.51215e+06
Q9NUQ8	ABCF3	ATP-binding cassette sub-family F member 3	0.0153631	0.647387	0.468118	-0.6273	0.3296	0	0.704308	1.17465e+06	827316	1.38228e+06	967021	474295	1.18034e+06
O15116	LSM1	U6 snRNA-associated Sm-like protein LSm1	0.0167598	0.647701	0.24437	-0.6266	0.612	0	0.655675	2.64473e+06	1.73408e+06	2.25066e+06	3.03879e+06	2.11103e+06	1.35714e+06
P57772	EEFSEC	Selenocysteine-specific elongation factor	0.00977654	0.648285	0.310431	-0.6253	0.508	0	0.678199	3.0425e+06	2.06342e+06	3.27747e+06	2.80753e+06	1.44096e+06	2.68588e+06
Q9H3N1	TMX1	Thioredoxin-related transmembrane protein 1	0.0740223	0.648914	0.071568	-0.6239	1.145	0	0.653334	1.51997e+07	9.93045e+06	1.60419e+07	1.43574e+07	1.10398e+07	8.82111e+06
P49773	HINT1	Adenosine 5'-monophosphoramidase HINT1	0.0893855	0.649274	0.0758687	-0.6231	1.12	0	0.648133	1.97558e+07	12804389	17768258	2.17433e+07	13832962	11775816
Q9GZT8	NIF3L1	NIF3-like protein 1	0.00139665	0.649679	0.128257	-0.6222	0.8919	0	0.640873	422699	270896	351544	493853	278156	263636
Q7Z4W1	DCXR	L-xylulose reductase	0.0684358	0.64995	0.101951	-0.6216	0.9916	0	0.645776	7.00386e+06	4.52293e+06	6.0616e+06	7.94613e+06	4.80149e+06	4.24436e+06
O00471	EXOC5	Exocyst complex component 5	0.0125698	0.650761	0.63014	-0.6198	0.2006	0	0.837302	1.47333e+06	1.23362e+06	1304830	1.64182e+06	446735	2.0205e+06
Q9NP92	MRPS30	39S ribosomal protein S30, mitochondrial	0.0293296	0.651483	0.363461	-0.6182	0.4395	0	0.689305	5.16099e+06	3.55749e+06	4.6442e+06	5.67777e+06	2.35022e+06	4.76477e+06
O43488	AKR7A2	Aflatoxin B1 aldehyde reductase member 2	0.047486	0.651483	0.37013	-0.6182	0.4316	0	0.687907	4.78525e+06	3.29181e+06	5.32962e+06	4.24089e+06	2.16546e+06	4418155
O75155	CAND2	Cullin-associated NEDD8-dissociated protein 2	0.0377095	0.651528	0.245159	-0.6181	0.6106	0	0.664586	2.3219e+06	1.5431e+06	2.61215e+06	2.03164e+06	1.19333e+06	1.89287e+06
P14927	UQCRB	Cytochrome b-c1 complex subunit 7	0.00977654	0.651845	0.00608666	-0.6174	2.216	0	0.651573	4.02905e+06	2.62522e+06	4.06407e+06	3.99403e+06	2.70886e+06	2.54158e+06
Q5TFE4	NT5DC1	5'-nucleotidase domain-containing protein 1	0.0558659	0.652251	0.495241	-0.6165	0.3052	0	0.682807	1.6961e+07	1.15811e+07	2.16863e+07	1.22357e+07	6.91192e+06	1.62503e+07
P45954	ACADSB	Short/branched chain specific acyl-CoA dehydrogenase, mitochondrial	0.0712291	0.652342	0.491746	-0.6163	0.3083	0	0.735153	5.5625e+06	4.08929e+06	5.98003e+06	5.14498e+06	2.18083e+06	5.99775e+06
O15047	SETD1A	Histone-lysine N-methyltransferase SETD1A	0.051676	0.652523	0.275383	-0.6159	0.5601	0	0.675493	706879	477492	650684	763074	348533	606451
P23368	ME2	NAD-dependent malic enzyme, mitochondrial	0.047486	0.652794	0.220036	-0.6153	0.6575	0	0.66999	2.49118e+06	1.66907e+06	2383903	2.59846e+06	2.05806e+06	1.28007e+06
Q9P032	NDUFAF4	NADH dehydrogenase [ubiquinone] 1 alpha subcomplex assembly factor 4	0.047486	0.653111	0.198287	-0.6146	0.7027	0	0.655272	8.98343e+06	5.8866e+06	1.0238e+07	7.72891e+06	4.85709e+06	6.91611e+06
Q9NPJ3	ACOT13	Acyl-coenzyme A thioesterase 13	0.027933	0.653292	0.0938715	-0.6142	1.027	0	0.651122	2.57411e+06	1.67606e+06	2.27254e+06	2.87568e+06	1804669	1.54745e+06
Q13618	CUL3	Cullin-3	0.0642458	0.653292	0.0435229	-0.6142	1.361	0	0.652034	1.03741e+07	6.7643e+06	1.12805e+07	9.46774e+06	6.93462e+06	6.59397e+06
Q6RW13	AGTRAP	Type-1 angiotensin II receptor-associated protein	0.0027933	0.653337	0.423688	-0.6141	0.373	0	0.684696	1.9495e+06	1.33481e+06	2.35013e+06	1.54886e+06	858896	1.81073e+06
P55263	ADK	Adenosine kinase	0.0195531	0.653473	0.352538	-0.6138	0.4528	0	0.680069	1.58148e+06	1.07551e+06	1.34889e+06	1.81406e+06	1.41147e+06	739560
Q9Y4F1	FARP1	FERM, ARHGEF and pleckstrin domain-containing protein 1	0.027933	0.653519	0.501834	-0.6137	0.2994	0	0.607119	5.49393e+06	3.33547e+06	3.12411e+06	7.86375e+06	4.14374e+06	2.52719e+06
P61970	NUTF2	Nuclear transport factor 2	0.0335196	0.654244	0.0406291	-0.6121	1.391	0	0.656137	1.2501e+07	8.20234e+06	1.28064e+07	12195530	8.89822e+06	7.50646e+06
O95197	RTN3	Reticulon-3	0.075419	0.654924	0.039502	-0.6106	1.403	0	0.652559	15476145	1.00991e+07	1.67067e+07	1.42456e+07	1.04194e+07	9.77885e+06
P07311	ACYP1	Acylphosphatase-1	0.0027933	0.65497	0.338935	-0.6105	0.4699	0	0.681344	3.00977e+06	2.05068e+06	2.60989e+06	3409648	2.67116e+06	1.43021e+06
P49903	SEPHS1	Selenide, water dikinase 1	0.0377095	0.655696	0.016411	-0.6089	1.785	0	0.656293	6.45828e+06	4.23852e+06	6310043	6.60652e+06	4.44563e+06	4.03141e+06
Q9H0U6	MRPL18	39S ribosomal protein L18, mitochondrial	0.051676	0.655787	0.222075	-0.6087	0.6535	0	0.662584	6124382	4.05792e+06	5.29476e+06	6.95401e+06	3.2633e+06	4.85253e+06
O14802	POLR3A	DNA-directed RNA polymerase III subunit RPC1	0.0307263	0.65606	0.43868	-0.6081	0.3579	0	0.701524	5.70755e+06	4.00398e+06	6.64572e+06	4.76938e+06	2.46167e+06	5.5463e+06
O14773	TPP1	Tripeptidyl-peptidase 1	0.051676	0.656606	0.155794	-0.6069	0.8074	0	0.665179	4.82932e+06	3.21236e+06	5.14052e+06	4.51812e+06	2.64523e+06	3.77949e+06
Q9UNF0	PACSIN2	Protein kinase C and casein kinase substrate in neurons protein 2	0.0293296	0.657335	0.239556	-0.6053	0.6206	0	0.673137	1.03114e+07	6.941e+06	9.33864e+06	1.12842e+07	8.54349e+06	5.33851e+06
Q96S97	MYADM	Myeloid-associated differentiation marker	0.00698324	0.657654	0.353348	-0.6046	0.4518	0	0.6669	1720606	1.14747e+06	1.35657e+06	2.08464e+06	1.4565e+06	838440
Q9Y3B7	MRPL11	39S ribosomal protein L11, mitochondrial	0.0530726	0.658247	0.0779145	-0.6033	1.108	0	0.657114	1.64384e+07	1.08019e+07	1.52372e+07	17639619	9.74316e+06	1.18607e+07
Q9BVM2	DPCD	Protein DPCD	0.0349162	0.659023	0.0847956	-0.6016	1.072	0	0.653964	2.98853e+06	1.95439e+06	3.36527e+06	2611798	1.90507e+06	2.00372e+06
P03928	MT-ATP8	ATP synthase protein 8	0.00977654	0.65916	0.394221	-0.6013	0.4043	0	0.674877	5.5847e+06	3.76899e+06	6815250	4.35416e+06	2.62205e+06	4.91592e+06
Q3SY69	ALDH1L2	Mitochondrial 10-formyltetrahydrofolate dehydrogenase	0.00558659	0.659388	0.379227	-0.6008	0.4211	0	0.704944	1.03143e+07	7.271e+06	9.76799e+06	1.08606e+07	4.71354e+06	9.82846e+06
P56962	STX17	Syntaxin-17	0.00558659	0.659388	0.349783	-0.6008	0.4562	0	0.679808	731510	497286	852110	610909	351520	643052
Q9BV44	THUMPD3	tRNA (guanine(6)-N2)-methyltransferase THUMP3	0.0167598	0.659388	0.350157	-0.6008	0.4557	0	0.695553	7.15133e+06	4.97413e+06	7.66686e+06	6635806	3.36013e+06	6.58812e+06
Q8N9N7	LRRC57	Leucine-rich repeat-containing protein 57	0	0.659708	0.135308	-0.6001	0.8687	0	0.669666	494506	331154	496217	492794	387338	274969
P62070	RRAS2	Ras-related protein R-Ras2	0.027933	0.659754	0.33998	-0.6	0.4685	0	0.639374	4.7674e+06	3.04815e+06	3.40031e+06	6134482	3.53028e+06	2566015
Q9Y248	GINS2	DNA replication complex GINS protein PSF2	0	0.659845	0.252166	-0.5998	0.5983	0	0.643157	1.70868e+06	1.09895e+06	1.29824e+06	2.11911e+06	999820	1.19808e+06
Q8N4Q1	CHCHD4	Mitochondrial intermembrane space import and assembly protein 40	0.0572626	0.66012	0.147362	-0.5992	0.8316	0	0.669402	2.70844e+06	1.81304e+06	2.81906e+06	2.59783e+06	1.49612e+06	2.12995e+06
P51553	IDH3G	Isocitrate dehydrogenase [NAD] subunit gamma, mitochondrial	0.0167598	0.660303	0.43831	-0.5988	0.3582	0	0.718155	1.98764e+06	1.42743e+06	2.1582e+06	1.81708e+06	857214	1.99765e+06
Q9BV20	MRI1	Methylthioribose-1-phosphate isomerase	0.0628492	0.660578	0.207112	-0.5982	0.6838	0	0.676475	6.17441e+06	4.17683e+06	6.3379e+06	6.01091e+06	3.25802e+06	5.09563e+06
Q6L8Q7	PDE12	2',5'-phosphodiesterase 12	0.099162	0.660623	0.368095	-0.5981	0.434	0	0.667348	5.49993e+06	3.67037e+06	6.75783e+06	4.24203e+06	2.68637e+06	4.65436e+06
P25325	MPST	3-mercaptopyruvate sulfurtransferase	0.047486	0.660715	0.111149	-0.5979	0.9541	0	0.667199	9.17561e+06	6.12196e+06	8.7819e+06	9.56931e+06	7.00359e+06	5.24032e+06
Q09472	EP300	Histone acetyltransferase p300	0.0111732	0.661356	0.333767	-0.5965	0.4766	0	0.69617	1.78472e+06	1.24247e+06	1.87422e+06	1.69522e+06	852917	1.63202e+06
Q5JTZ9	AARS2	Alanine--tRNA ligase, mitochondrial	0.0614525	0.661677	0.45787	-0.5958	0.3393	0	0.711779	1.45963e+07	1.03893e+07	1.6748e+07	1.24446e+07	6210238	1.45684e+07
Q9NR45	NANS	Sialic acid synthase	0.0530726	0.661769	0.314484	-0.5956	0.5024	0	0.680354	9.66277e+06	6.5741e+06	8.32229e+06	1.10033e+07	8.34801e+06	4.8002e+06
Q9Y3A5	SBDS	Ribosome maturation protein SBDS	0.0460894	0.661861	0.309881	-0.5954	0.5088	0	0.65019	1.51489e+07	9.84965e+06	1.1304e+07	1.89938e+07	1.14451e+07	8.25422e+06
P49840	GSK3A	Glycogen synthase kinase-3 alpha	0.0139665	0.66209	0.308179	-0.5949	0.5112	0	0.635096	1.94984e+06	1.23833e+06	2.50661e+06	1.39306e+06	1.14803e+06	1.32863e+06
O95260	ATE1	Arginyl-tRNA--protein transferase 1	0.00139665	0.662458	0.299843	-0.5941	0.5231	0	0.678466	707788	480210	808520	607056	358171	602249
Q9NXR7	BABAM2	BRISC and BRCA1-A complex member 2	0.0488827	0.662687	0.475001	-0.5936	0.3233	0	0.679533	1.0628e+06	722207	1.3629e+06	762698	464513	979901
O95861	BPNT1	3'(2'),5'-bisphosphate nucleotidase 1	0.0432961	0.663147	0.290124	-0.5926	0.5374	0	0.670861	4.46382e+06	2.9946e+06	3.71385e+06	5213781	3.67529e+06	2.31391e+06
Q9UMY4	SNX12	Sorting nexin-12	0.0153631	0.663239	0.26763	-0.5924	0.5725	0	0.67794	6.51738e+06	4.41839e+06	5.73112e+06	7.30364e+06	5.46258e+06	3.3742e+06
Q9BXW7	HDHD5	Haloacid dehalogenase-like hydrolase domain-containing 5	0.0740223	0.663561	0.50747	-0.5917	0.2946	0	0.69591	2.16683e+07	1.50792e+07	2.77776e+07	1.5559e+07	9.05278e+06	2.11056e+07
Q9BWS9	CHID1	Chitinase domain-containing protein 1	0.0265363	0.663791	0.0828206	-0.5912	1.082	0	0.665922	2.34913e+06	1.56434e+06	2.5076e+06	2.19065e+06	1.40329e+06	1.72538e+06
P85037	FOXK1	Forkhead box protein K1	0.0530726	0.664113	0.0946854	-0.5905	1.024	0	0.66956	9.93188e+06	6.64999e+06	1.01108e+07	9.753e+06	5.76006e+06	7.53992e+06
O75530	EED	Polycomb protein EED	0.0139665	0.666003	0.147287	-0.5864	0.8318	0	0.674579	337825	227890	349411	326240	189246	266534
Q96EI5	TCEAL4	Transcription elongation factor A protein-like 4	0.0740223	0.666187	0.095918	-0.586	1.018	0	0.671739	4.08884e+06	2.74664e+06	4.18329e+06	3.99439e+06	2.38066e+06	3.11262e+06
Q9UPN9	TRIM33	E3 ubiquitin-protein ligase TRIM33	0.0963687	0.666326	0.334263	-0.5857	0.4759	0	0.699679	3.97167e+06	2.77889e+06	4.10989e+06	3.83344e+06	1.91754e+06	3.64024e+06
Q5BJH7	YIF1B	Protein YIF1B	0.0027933	0.666973	0.194209	-0.5843	0.7117	0	0.675	965889	651976	1.06034e+06	871441	532254	771697
Q8TE02	ELP5	Elongator complex protein 5	0.0391061	0.667204	0.150872	-0.5838	0.8214	0	0.677403	465093	315055	476497	453688	259632	370479
Q9H8M7	MINDY3	Ubiquitin carboxyl-terminal hydrolase MINDY-3	0.00837989	0.667297	0.950712	-0.5836	0.02195	0	0.445785	539282	240404	100	539282	240404	100
Q86WA6	BPHL	Valacyclovir hydrolase	0	0.66762	0.503114	-0.5829	0.2983	0	0.741144	2.3358e+06	1.73116e+06	2.65649e+06	2.01511e+06	957509	2.50482e+06
Q8TCX1	DYNC2LI1	Cytoplasmic dynein 2 light intermediate chain 1	0	0.667852	0.36251	-0.5824	0.4407	0	0.670669	415842	278892	511732	319952	210262	347523
Q969U7	PSMG2	Proteasome assembly chaperone 2	0.0377095	0.668037	0.0222571	-0.582	1.653	0	0.667047	2.42433e+06	1.61714e+06	2.3154e+06	2.53326e+06	1.6856e+06	1.54869e+06
O75044	SRGAP2	SLIT-ROBO Rho GTPase-activating protein 2	0.0963687	0.668408	0.353666	-0.5812	0.4514	0	0.697831	630328	439862	700671	559986	574632	305093
Q9P2T1	GMPR2	GMP reductase 2	0.00558659	0.668686	0.951382	-0.5806	0.02165	0	0.447898	576518	258221	100	576518	100	258221
Q6P1Q9	METTL2B	tRNA N(3)-methylcytidine methyltransferase METTL2B	0.0656425	0.669288	0.00533813	-0.5793	2.273	0	0.669625	559333	374543	569634	549032	382742	366345
P30622	CLIP1	CAP-Gly domain-containing linker protein 1	0.0209497	0.669428	0.277222	-0.579	0.5572	0	0.692584	556545	385454	519513	593578	286488	484421
Q53FT3	HIKESHI	Protein Hikeshi	0.00139665	0.66952	0.299531	-0.5788	0.5236	0	0.650582	2.9754e+06	1.93574e+06	3.75082e+06	2.19998e+06	1.71681e+06	2.15467e+06
Q96ER3	SAAL1	Protein SAAL1	0.00558659	0.66966	0.198698	-0.5785	0.7018	0	0.684001	3.47826e+06	2.37913e+06	3.59962e+06	3.3569e+06	1.8867e+06	2871568
Q8N983	MRPL43	39S ribosomal protein L43, mitochondrial	0.0656425	0.669799	0.464157	-0.5782	0.3333	0	0.708784	5.07943e+06	3.60022e+06	4.06237e+06	6.09648e+06	2.24142e+06	4.95901e+06
P62942	FKBP1A	Peptidyl-prolyl cis-trans isomerase FKBP1A	0.0782123	0.669799	0.256669	-0.5782	0.5906	0	0.685748	1.74564e+07	11970688	1.57103e+07	1.92025e+07	1.47385e+07	9.20283e+06
Q14847	LASP1	LIM and SH3 domain protein 1	0.0837989	0.670449	0.00468342	-0.5768	2.329	0	0.670592	3.28887e+06	2.20549e+06	3.37797e+06	3.19978e+06	2.21128e+06	2.1997e+06
Q9Y5K5	UCHL5	Ubiquitin carboxyl-terminal hydrolase isozyme L5	0.0824022	0.670961	0.185827	-0.5757	0.7309	0	0.667166	1.26775e+07	8.45799e+06	1.46451e+07	1.07099e+07	7.38137e+06	9.53461e+06
Q9H490	PIGU	Phosphatidylinositol glycan anchor biosynthesis class U protein	0.023743	0.671379	0.253608	-0.5748	0.5958	0	0.683694	704232	481479	785544	622920	376370	586587
Q92820	GGH	Gamma-glutamyl hydrolase	0.0251397	0.672124	0.380402	-0.5732	0.4198	0	0.679165	4.46393e+06	3.03174e+06	3.4458e+06	5.48205e+06	3.83049e+06	2.233e+06
Q7Z2Z2	EFL1	Elongation factor-like GTPase 1	0.0628492	0.672404	0.308116	-0.5726	0.5113	0	0.645432	392276	253187	502698	281854	264624	241750
Q13362	PPP2R5C	Serine/threonine-protein phosphatase 2A 56 kDa regulatory subunit gamma isoform	0.0614525	0.672497	0.946475	-0.5724	0.02389	0	0.450239	241123	108563	241123	100	108563	100
O15143	ARPC1B	Actin-related protein 2/3 complex subunit 1B	0.0614525	0.672637	0.409769	-0.5721	0.3875	0	0.668102	6.45107e+06	4.30997e+06	8.22928e+06	4.67285e+06	3.22304e+06	5.3969e+06
Q9NRF9	POLE3	DNA polymerase epsilon subunit 3	0.0223464	0.67329	0.0687228	-0.5707	1.163	0	0.670104	2.50271e+06	1.67708e+06	2.24137e+06	2.76406e+06	1.7295e+06	1.62465e+06
Q9UG56	PISD	Phosphatidylserine decarboxylase proenzyme, mitochondrial	0.0027933	0.673383	0.0358644	-0.5705	1.445	0	0.674382	966578	651843	1.0181e+06	915059	616375	687311
P49770	EIF2B2	Translation initiation factor eIF-2B subunit beta	0.0335196	0.673617	0.0972276	-0.57	1.012	0	0.671785	3.53772e+06	2.37659e+06	3.93541e+06	3.14003e+06	2.21074e+06	2.54243e+06
Q9BV86	NTMT1	N-terminal Xaa-Pro-Lys N-methyltransferase 1	0.0265363	0.674785	0.277948	-0.5675	0.556	0	0.651218	4.41844e+06	2.87736e+06	5.57015e+06	3.26672e+06	2.84846e+06	2.90627e+06
P10253	GAA	Lysosomal alpha-glucosidase	0.023743	0.6753	0.436437	-0.5664	0.3601	0	0.730402	1.73738e+06	1.26899e+06	1.74032e+06	1.73444e+06	1.75797e+06	780001
Q9H6F5	CCDC86	Coiled-coil domain-containing protein 86	0.0600559	0.6753	0.169108	-0.5664	0.7718	0	0.681972	3.51152e+06	2.39476e+06	3.80291e+06	3.22013e+06	1.99589e+06	2.79362e+06
O00764	PDXK	Pyridoxal kinase	0.0810056	0.67544	0.289216	-0.5661	0.5388	0	0.694032	4.3802e+06	3.04e+06	4.82045e+06	3.93995e+06	2.27677e+06	3.80323e+06
Q9HD15	SRA1	Steroid receptor RNA activator 1	0	0.675487	0.0375055	-0.566	1.426	0	0.673268	805821	542534	743484	868159	547363	537704
P12532	CKMT1A	Creatine kinase U-type, mitochondrial	0.099162	0.675862	0.32511	-0.5652	0.488	0	0.676979	1.37731e+07	9.32412e+06	1.67797e+07	1.07665e+07	7.40457e+06	1.12437e+07
P30519	HMOX2	Heme oxygenase 2	0.027933	0.676237	0.0718309	-0.5644	1.144	0	0.675988	6.50871e+06	4.39981e+06	7.04018e+06	5.97724e+06	4.07406e+06	4.72555e+06
Q9HCP0	CSNK1G1	Casein kinase I isoform gamma-1	0.00139665	0.676424	0.453177	-0.564	0.3437	0	0.620145	557940	346004	334600	781280	344562	347445
P24390	KDELR1	ER lumen protein-retaining receptor 1	0.0432961	0.676471	0.244855	-0.5639	0.6111	0	0.678904	3.44906e+06	2.34158e+06	3.97983e+06	2918295	1.91599e+06	2.76717e+06
Q8WUB8	PHF10	PHD finger protein 10	0.0865922	0.676799	0.291002	-0.5632	0.5361	0	0.654095	1.7391e+06	1.13754e+06	1.28438e+06	2.19382e+06	1.07389e+06	1.20118e+06
Q8N122	RPTOR	Regulatory-associated protein of mTOR	0.0195531	0.676846	0.371811	-0.5631	0.4297	0	0.715861	4.48268e+06	3.20898e+06	4.30503e+06	4.66033e+06	2.15683e+06	4.26113e+06
Q14678	KANK1	KN motif and ankyrin repeat domain-containing protein 1	0.0181564	0.677081	0.288867	-0.5626	0.5393	0	0.654453	948230	620572	1.19783e+06	698629	598285	642859
Q14197	MRPL58	Peptidyl-tRNA hydrolase ICT1, mitochondrial	0.0600559	0.677081	0.276346	-0.5626	0.5585	0	0.698156	4.83692e+06	3.37693e+06	4.54492e+06	5.12893e+06	2532791	4.22106e+06
Q8IYB8	SUPV3L1	ATP-dependent RNA helicase SUPV3L1, mitochondrial	0.0223464	0.67755	0.419045	-0.5616	0.3777	0	0.649355	6.31024e+06	4.09759e+06	8.38996e+06	4.23053e+06	3.37776e+06	4.81742e+06
Q9UK41	VPS28	Vacuolar protein sorting-associated protein 28 homolog	0.00977654	0.677785	0.225426	-0.5611	0.647	0	0.692042	1.28489e+06	889197	1.2134e+06	1356373	1078731	699663
Q15334	LLGL1	Lethal(2) giant larvae protein homolog 1	0.0265363	0.677879	0.666176	-0.5609	0.1764	0	0.890734	991601	883253	1.03644e+06	946766	310425	1.45608e+06
P14324	FDPS	Farnesyl pyrophosphate synthase	0.0837989	0.677879	0.473604	-0.5609	0.3246	0	0.677994	3.04224e+07	2.06262e+07	3.9789e+07	2.10558e+07	14448722	2.68037e+07
Q969N2	PIGT	GPI transamidase component PIG-T	0.00977654	0.677926	0.280455	-0.5608	0.5521	0	0.698679	2.81551e+06	1.96714e+06	2.96993e+06	2.66109e+06	1.46558e+06	2.4687e+06
Q86UA6	RPAIN	RPA-interacting protein	0.00139665	0.67802	0.102318	-0.5606	0.99	0	0.672236	533722	358787	602050	465394	344665	372910
P15374	UCHL3	Ubiquitin carboxyl-terminal hydrolase isozyme L3	0.0335196	0.678772	0.0702991	-0.559	1.153	0	0.675003	9.12905e+06	6.16214e+06	1.00256e+07	8.23254e+06	6.45785e+06	5.86643e+06
O75718	CRTAP	Cartilage-associated protein	0.0153631	0.679102	0.467457	-0.5583	0.3303	0	0.728506	4.49794e+06	3.27677e+06	5.17589e+06	3.81998e+06	2.012e+06	4.54155e+06
Q9Y2Z4	YARS2	Tyrosine--tRNA ligase, mitochondrial	0.0907821	0.679149	0.463319	-0.5582	0.3341	0	0.728093	3.8962e+06	2.83679e+06	4.47592e+06	3.31647e+06	1.75032e+06	3.92327e+06
O95202	LETM1	Mitochondrial proton/calcium exchanger protein	0.0893855	0.679714	0.0511792	-0.557	1.291	0	0.679916	1.87823e+07	1.27704e+07	1.72504e+07	2.03143e+07	1.33308e+07	1.221e+07
Q14CX7	NAA25	N-alpha-acetyltransferase 25, NatB auxiliary subunit	0.00837989	0.680185	0.460751	-0.556	0.3365	0	0.675965	1.55281e+07	1.04964e+07	2.02616e+07	1.07945e+07	7.5716e+06	1.34213e+07
Q9UBP6	METTL1	tRNA (guanine-N(7)-)-methyltransferase	0.00418994	0.680233	0.315366	-0.5559	0.5012	0	0.70822	339817	240665	350411	329222	173369	307961
P09110	ACAA1	3-ketoacyl-CoA thiolase, peroxisomal	0.0349162	0.68061	0.224106	-0.5551	0.6495	0	0.696335	262367	182695	247959	276775	144215	221176
Q9NUU7	DDX19A	ATP-dependent RNA helicase DDX19A	0.0935754	0.680657	0.0601942	-0.555	1.22	0	0.678872	2.02851e+07	1.3771e+07	2.22843e+07	1.82859e+07	1.37382e+07	13803792
Q96KB5	PBK	Lymphokine-activated killer T-cell-originated protein kinase	0.0321229	0.680751	0.0402895	-0.5548	1.395	0	0.682697	2.30046e+06	1.57052e+06	2.25202e+06	2.34891e+06	1453185	1.68785e+06
Q14691	GINS1	DNA replication complex GINS protein PSF1	0.0139665	0.681412	0.482305	-0.5534	0.3167	0	0.679948	3.2565e+06	2.21425e+06	4.26373e+06	2.24928e+06	1.54183e+06	2.88667e+06
Q9Y679	AUP1	Lipid droplet-regulating VLDL assembly factor AUP1	0.0125698	0.681601	0.227166	-0.553	0.6437	0	0.692308	3.80447e+06	2.63386e+06	4.16157e+06	3.44736e+06	2.11089e+06	3.15684e+06
P78318	IGBP1	Immunoglobulin-binding protein 1	0.0949721	0.681649	0.249286	-0.5529	0.6033	0	0.695333	3.39254e+06	2.35894e+06	3.07864e+06	3.70644e+06	1.85055e+06	2.86734e+06
O75352	MPDU1	Mannose-P-dolichol utilization defect 1 protein	0.0614525	0.681696	0.133307	-0.5528	0.8751	0	0.688319	2.19197e+06	1.50878e+06	2.24921e+06	2.13473e+06	1.28172e+06	1.73583e+06
O95714	HERC2	E3 ubiquitin-protein ligase HERC2	0.0153631	0.682168	0.0119946	-0.5518	1.921	0	0.683058	7.15458e+06	4.88699e+06	7.11645e+06	7.1927e+06	4.68409e+06	5.08989e+06
Q04864	REL	Proto-oncogene c-Rel	0.00139665	0.6825	0.360085	-0.5511	0.4436	0	0.710998	612850	435735	676150	549550	305853	565617
O95684	CEP43	Centrosomal protein 43	0.0824022	0.682831	0.369148	-0.5504	0.4328	0	0.70874	3.46286e+06	2.45427e+06	3.00554e+06	3.92017e+06	1.73155e+06	3.17698e+06
Q9UMX0	UBQLN1	Ubiquilin-1	0.0432961	0.683731	0.112229	-0.5485	0.9499	0	0.683756	1.15493e+07	7.89694e+06	1.03733e+07	1.27254e+07	8.66015e+06	7.13373e+06
Q92990	GLMN	Glomulin	0.0391061	0.684015	0.0833858	-0.5479	1.079	0	0.683893	3.14075e+06	2.14794e+06	3.37794e+06	2.90357e+06	1.95796e+06	2.33791e+06
O14683	TP53I11	Tumor protein p53-inducible protein 11	0	0.684062	0.52931	-0.5478	0.2763	0	0.749979	863332	647480	1.01676e+06	709908	364227	930733
Q86X83	COMMD2	COMM domain-containing protein 2	0.0125698	0.68411	0.387201	-0.5477	0.4121	0	0.71906	2.6784e+06	1.92593e+06	2.94961e+06	2.4072e+06	1.30722e+06	2.54465e+06
O14561	NDUFAB1	Acyl carrier protein, mitochondrial	0.0027933	0.684869	0.0463974	-0.5461	1.334	0	0.682354	4.97227e+06	3.39285e+06	5.36106e+06	4583489	3.49777e+06	3.28794e+06
Q9H7S9	ZNF703	Zinc finger protein 703	0.0363128	0.685106	0.0667713	-0.5456	1.175	0	0.68682	2.26685e+06	1.55692e+06	2.27016e+06	2.26354e+06	1.39825e+06	1.71559e+06
Q5VW36	FOCAD	Focadhesin	0.0027933	0.685486	0.376107	-0.5448	0.4247	0	0.684091	327888	224305	405322	250455	173133	275478
Q96GF1	RNF185	E3 ubiquitin-protein ligase RNF185	0	0.6862	0.391374	-0.5433	0.4074	0	0.714815	514619	367858	582871	446367	254109	481607
Q7Z4Q2	HEATR3	HEAT repeat-containing protein 3	0.0111732	0.6862	0.303279	-0.5433	0.5182	0	0.712189	7.03519e+06	5.01038e+06	7.06222e+06	7.00815e+06	3.67288e+06	6.34788e+06
P30405	PPIF	Peptidyl-prolyl cis-trans isomerase F, mitochondrial	0.0740223	0.68639	0.0428678	-0.5429	1.368	0	0.687957	3.12308e+06	2.14854e+06	3.21661e+06	3.02955e+06	2.3087e+06	1.98838e+06
Q96G03	PGM2	Phosphopentomutase	0.0349162	0.686485	0.229782	-0.5427	0.6387	0	0.691013	2.54356e+07	1.75764e+07	2.90084e+07	21862827	1.46061e+07	2.05466e+07
Q9BUN8	DERL1	Derlin-1	0.00837989	0.687104	0.338363	-0.5414	0.4706	0	0.715707	533832	382068	568700	498965	273445	490690
Q96C90	PPP1R14B	Protein phosphatase 1 regulatory subunit 14B	0.0181564	0.687151	0.18494	-0.5413	0.733	0	0.694176	2.7663e+06	1.9203e+06	2.53164e+06	3000956	2.23973e+06	1.60086e+06
P07108	DBI	Acyl-CoA-binding protein	0.0335196	0.687247	0.238034	-0.5411	0.6234	0	0.696406	11690987	8.14167e+06	10377419	13004555	9.71682e+06	6.56652e+06
P61769	B2M	Beta-2-microglobulin	0.0195531	0.687294	0.00457149	-0.541	2.34	0	0.688183	1.75945e+06	1.21082e+06	1.77107e+06	1.74784e+06	1184522	1.23713e+06
O95747	OXSR1	Serine/threonine-protein kinaseR1	0.0810056	0.687294	0.363225	-0.541	0.4398	0	0.690324	1.86464e+07	1.2872e+07	2.26219e+07	1.46709e+07	9.86986e+06	1.58742e+07
Q9H9J2	MRPL44	39S ribosomal protein L44, mitochondrial	0.0824022	0.687342	0.426983	-0.5409	0.3696	0	0.696877	1.24717e+07	8.69127e+06	9.55951e+06	1.5384e+07	6.20903e+06	1.11735e+07
Q9UHR6	ZNHIT2	Zinc finger HIT domain-containing protein 2	0	0.687628	0.469413	-0.5403	0.3284	0	0.747476	1.84244e+06	1.37718e+06	1802921	1.88197e+06	828682	1.92568e+06
Q9NX63	CHCHD3	MICOS complex subunit MIC19	0.0851955	0.687628	0.175242	-0.5403	0.7564	0	0.700298	1.32509e+07	9.27956e+06	1.28574e+07	1.36443e+07	7614219	1.09449e+07
O95671	ASMTL	Probable bifunctional dTTP/UTP pyrophosphatase/methyltransferase protein	0	0.687771	0.0368018	-0.54	1.434	0	0.689953	1.36709e+06	943226	1.42664e+06	1.30753e+06	999096	887356
Q96EY8	MMAB	Corrinoid adenosyltransferase MMAB	0.00418994	0.688009	0.0307863	-0.5395	1.512	0	0.688462	4.33946e+06	2.98755e+06	4.17395e+06	4.50497e+06	3.15146e+06	2.82365e+06
Q9Y672	ALG6	Dolichyl pyrophosphate Man9GlcNAc2 alpha-1,3-glucosyltransferase	0	0.688057	0.464895	-0.5394	0.3326	0	0.727586	3.21481e+06	2.33905e+06	3.75963e+06	2.66999e+06	1.4882e+06	3.1899e+06
Q96DV4	MRPL38	39S ribosomal protein L38, mitochondrial	0.047486	0.68925	0.209887	-0.5369	0.678	0	0.698385	1.06558e+07	7.44182e+06	9.86921e+06	1.14423e+07	6.03826e+06	8845373
Q9Y376	CAB39	Calcium-binding protein 39	0.00139665	0.689346	0.216817	-0.5367	0.6639	0	0.695037	2.04468e+06	1.42113e+06	1.80083e+06	2.28853e+06	1657666	1.18459e+06
P56589	PEX3	Peroxisomal biogenesis factor 3	0.0027933	0.689346	0.290211	-0.5367	0.5373	0	0.711302	1.03661e+06	737344	1064217	1.009e+06	549524	925163
O75674	TOM1L1	TOM1-like protein 1	0	0.689441	0.140043	-0.5365	0.8537	0	0.698247	484263	338136	475863	492664	285809	390462
Q9BS26	ERP44	Endoplasmic reticulum resident protein 44	0.0893855	0.689728	0.169736	-0.5359	0.7702	0	0.700455	5.28324e+06	3.70067e+06	5.15878e+06	5.4077e+06	4.33671e+06	3.06464e+06
Q5VTR2	RNF20	E3 ubiquitin-protein ligase BRE1A	0.0865922	0.690015	0.637927	-0.5353	0.1952	0	0.831206	1.85702e+06	1.54356e+06	1.54958e+06	2.16446e+06	656202	2.43093e+06
Q86TP1	PRUNE1	Exopolyphosphatase PRUNE1	0.075419	0.690254	0.606777	-0.5348	0.217	0	0.82137	1.46266e+06	1.20139e+06	1.45399e+06	1.47133e+06	545794	1.85698e+06
Q13131	PRKAA1	5'-AMP-activated protein kinase catalytic subunit alpha-1	0.0251397	0.690446	0.608801	-0.5344	0.2155	0	0.741325	1.57756e+06	1.16949e+06	2.09933e+06	1.05579e+06	617260	1.72171e+06
Q8TEA8	DTD1	D-aminoacyl-tRNA deacylase 1	0.0349162	0.690685	0.349861	-0.5339	0.4561	0	0.662376	2.08007e+06	1.37779e+06	1.47125e+06	2.68888e+06	1.44076e+06	1.31481e+06
Q96FX7	TRMT61A	tRNA (adenine(58)-N(1))-methyltransferase catalytic subunit TRMT61A	0.0223464	0.69102	0.361226	-0.5332	0.4422	0	0.688632	1.48613e+06	1.0234e+06	1.82167e+06	1.15059e+06	805630	1.24116e+06
Q14353	GAMT	Guanidinoacetate N-methyltransferase	0	0.691547	0.376857	-0.5321	0.4238	0	0.717795	860650	617770	970790	750509	437192	798347
P21964	COMT	Catechol O-methyltransferase	0.0446927	0.691979	0.205536	-0.5312	0.6871	0	0.701657	4.42479e+06	3.10469e+06	4.7581e+06	4.09148e+06	2.5429e+06	3.66648e+06
P21359	NF1	Neurofibromin	0.0572626	0.692219	0.71853	-0.5307	0.1436	0	0.944264	1.55594e+06	1.46922e+06	1.23068e+06	1.8812e+06	445326	2.49311e+06
P28838	LAP3	Cytosol aminopeptidase	0.0837989	0.692267	0.0705156	-0.5306	1.152	0	0.689392	2.5164e+07	1.73479e+07	2.28318e+07	2.74963e+07	1.66317e+07	1.8064e+07
Q8N6M0	OTUD6B	Deubiquitinase OTUD6B	0	0.693035	0.19268	-0.529	0.7152	0	0.690903	702699	485496	803040	602358	425572	545421
Q7L9L4	MOB1B	MOB kinase activator 1B	0.0935754	0.693131	0.222219	-0.5288	0.6532	0	0.682539	3.31855e+06	2.26504e+06	3.94388e+06	2.69322e+06	2.45802e+06	2.07206e+06
Q9P253	VPS18	Vacuolar protein sorting-associated protein 18 homolog	0.0027933	0.693467	0.300143	-0.5281	0.5227	0	0.719071	1.74888e+06	1.25757e+06	1.77235e+06	1.72541e+06	932189	1.58295e+06
O75323	NIPSNAP2	Protein NipSnap homolog 2	0.0335196	0.693515	0.429761	-0.528	0.3668	0	0.6871	2.69624e+06	1.85259e+06	3.43543e+06	1.95705e+06	1.40775e+06	2.29742e+06
P16435	POR	NADPH--cytochrome P450 reductase	0.0432961	0.693708	0.523814	-0.5276	0.2808	0	0.652318	1.07534e+07	7.01464e+06	1.50412e+07	6.46566e+06	5.45429e+06	8.57499e+06
Q9NQ50	MRPL40	39S ribosomal protein L40, mitochondrial	0.047486	0.693804	0.552047	-0.5274	0.258	0	0.784251	4.86355e+06	3.81424e+06	5.21829e+06	4.50881e+06	2.01917e+06	5.60932e+06
Q8NB49	ATP11C	Phospholipid-transporting ATPase IG	0	0.693996	0.162821	-0.527	0.7883	0	0.684758	1.66461e+06	1.13985e+06	1.93841e+06	1.3908e+06	1.10639e+06	1.17332e+06
Q9Y5X3	SNX5	Sorting nexin-5	0.047486	0.694815	0.0334003	-0.5253	1.476	0	0.695629	9.15457e+06	6.36818e+06	8.88105e+06	9.42809e+06	6.75987e+06	5.97649e+06
Q9NYB9	ABI2	Abl interactor 2	0.0600559	0.694863	0.228915	-0.5252	0.6403	0	0.710854	649111	461423	641558	656665	365345	557502
Q8NBQ5	HSD17B11	Estradiol 17-beta-dehydrogenase 11	0.00558659	0.695104	0.496008	-0.5247	0.3045	0	0.762395	4.57384e+06	3.48707e+06	4.811e+06	4.33668e+06	2.05295e+06	4.9212e+06
Q96ST2	IWS1	Protein IWS1 homolog	0.0293296	0.695248	0.24231	-0.5244	0.6156	0	0.71063	3.1247e+06	2.22051e+06	2.9614e+06	3.28801e+06	1.75426e+06	2.68675e+06
Q15102	PAFAH1B3	Platelet-activating factor acetylhydrolase IB subunit alpha1	0.0335196	0.695345	0.0158365	-0.5242	1.8	0	0.69562	4.41539e+06	3.07143e+06	4.2688e+06	4.56198e+06	2.97193e+06	3.17094e+06
Q96RT7	TUBGCP6	Gamma-tubulin complex component 6	0.00139665	0.695489	0.257144	-0.5239	0.5898	0	0.709601	581441	412591	624705	538176	323668	501514
Q96G25	MED8	Mediator of RNA polymerase II transcription subunit 8	0.0125698	0.695537	0.224548	-0.5238	0.6487	0	0.680207	714101	485736	566885	861317	489728	481744
Q96C01	FAM136A	Protein FAM136A	0.0111732	0.695586	0.241366	-0.5237	0.6173	0	0.693548	3.05585e+06	2.11938e+06	2.54544e+06	3.56627e+06	2.42047e+06	1.81829e+06
Q5JTJ3	COA6	Cytochrome c oxidase assembly factor 6 homolog	0.0377095	0.695682	0.177761	-0.5235	0.7502	0	0.695733	1.40707e+06	978948	1.23251e+06	1.58164e+06	1.1029e+06	854994
Q9BPU6	DPYSL5	Dihydropyrimidinase-related protein 5	0.0949721	0.695827	0.402412	-0.5232	0.3953	0	0.738102	4.29341e+06	3.16898e+06	4.40777e+06	4.17905e+06	2.12419e+06	4.21376e+06
Q8WUN7	UBTD2	Ubiquitin domain-containing protein 2	0.00698324	0.696406	0.95493	-0.522	0.02003	0	0.48398	432878	209505	100	432878	209505	100
Q9BZM4	ULBP3	UL16-binding protein 3	0.00139665	0.696551	0.955826	-0.5217	0.01962	0	0.485423	506949	246085	100	506949	246085	100
P31937	HIBADH	3-hydroxyisobutyrate dehydrogenase, mitochondrial	0.0460894	0.696937	0.219491	-0.5209	0.6586	0	0.695052	2.3659e+06	1.64442e+06	2.01078e+06	2721020	1.87181e+06	1.41704e+06
Q9UJC3	HOOK1	Protein Hook homolog 1	0.0125698	0.697227	0.124814	-0.5203	0.9037	0	0.701755	1.03694e+06	727678	1.06983e+06	1.00405e+06	628854	826501
Q9HBM1	SPC25	Kinetochore protein Spc25	0.00698324	0.697323	0.203895	-0.5201	0.6906	0	0.71012	212030	150567	217712	206348	179220	121913
Q99717	SMAD5	Mothers against decapentaplegic homolog 5	0.00698324	0.697759	0.684371	-0.5192	0.1647	0	0.908066	2.09269e+06	1.9003e+06	1.96423e+06	2.22115e+06	679088	3.12151e+06
Q8NBF2	NHLRC2	NHL repeat-containing protein 2	0.0824022	0.697904	0.559293	-0.5189	0.2524	0	0.742089	5.52699e+06	4.10152e+06	6.9667e+06	4.08729e+06	2.38908e+06	5.81396e+06
Q96BR5	COA7	Cytochrome c oxidase assembly factor 7	0.00837989	0.697952	0.0552346	-0.5188	1.258	0	0.695321	7.12899e+06	4.95694e+06	6.51416e+06	7.74382e+06	5.03905e+06	4.87483e+06
P37235	HPCAL1	Hippocalcin-like protein 1	0	0.698388	0.0640893	-0.5179	1.193	0	0.698265	349154	243802	322963	375344	258132	229472
Q9Y697	NFS1	Cysteine desulfurase	0.0321229	0.698533	0.183114	-0.5176	0.7373	0	0.703063	6.89795e+06	4.84969e+06	7.55405e+06	6.24186e+06	4.11616e+06	5.58323e+06
Q9Y618	NCOR2	Nuclear receptor corepressor 2	0.0782123	0.698775	0.541395	-0.5171	0.2665	0	0.782421	134171	104978	132875	135467	57292.3	152664
Q9UKS6	PACSIN3	Protein kinase C and casein kinase substrate in neurons protein 3	0.00977654	0.699017	0.46884	-0.5166	0.329	0	0.753962	7.11605e+06	5.36523e+06	6.68257e+06	7.54952e+06	7.40136e+06	3.3291e+06
Q9BV57	ADI1	Acireductone dioxygenase	0.0768156	0.699211	0.243625	-0.5162	0.6133	0	0.711556	7.18291e+06	5.11104e+06	7.74084e+06	6.62497e+06	4.08271e+06	6.13937e+06
Q9NRL3	STRN4	Striatin-4	0.0740223	0.69926	0.515859	-0.5161	0.2875	0	0.770178	1.37244e+06	1.05702e+06	1.42064e+06	1.32424e+06	606671	1.50738e+06
P20839	IMPDH1	Inosine-5'-monophosphate dehydrogenase 1	0.0446927	0.699599	0.125395	-0.5154	0.9017	0	0.699375	3.55274e+06	2.4847e+06	3.18501e+06	3.92048e+06	2.24873e+06	2.72067e+06
Q16718	NDUFA5	NADH dehydrogenase [ubiquinone] 1 alpha subcomplex subunit 5	0.0879888	0.699744	0.321295	-0.5151	0.4931	0	0.716251	9.17722e+06	6.57319e+06	8.13261e+06	1.02218e+07	4.97271e+06	8.17368e+06
Q8N5K1	CISD2	CDGSH iron-sulfur domain-containing protein 2	0.0153631	0.700327	0.0203802	-0.5139	1.691	0	0.699679	4.06481e+06	2.84406e+06	4.17467e+06	3.95496e+06	2.96967e+06	2.71846e+06
Q9UBB4	ATXN10	Ataxin-10	0.099162	0.700667	0.230716	-0.5132	0.6369	0	0.715579	1.83652e+07	1.31417e+07	1.91657e+07	1.75646e+07	1.04726e+07	1.58108e+07
Q13015	MLLT11	Protein AF1q	0.0265363	0.70125	0.35008	-0.512	0.4558	0	0.732306	435701	319066	433516	437886	227889	410244
Q9NVG8	TBC1D13	TBC1 domain family member 13	0	0.701395	0.0363015	-0.5117	1.44	0	0.699315	451501	315742	481788	421214	320914	310569
O60825	PFKFB2	6-phosphofructo-2-kinase/fructose-2,6-bisphosphatase 2	0.0293296	0.70193	0.0829818	-0.5106	1.081	0	0.703608	3.33364e+06	2.34558e+06	3.12177e+06	3.54551e+06	2.55478e+06	2.13638e+06
Q9UGI8	TES	Testin	0.0851955	0.702076	0.386204	-0.5103	0.4132	0	0.737375	1.65942e+07	1.22361e+07	1.73699e+07	1.58184e+07	8.46511e+06	16007134
Q9NX08	COMMD8	COMM domain-containing protein 8	0.0586592	0.703002	0.00125309	-0.5084	2.902	0	0.704962	1.69966e+06	1.19819e+06	1.679e+06	1.72031e+06	1.202e+06	1.19439e+06
Q9ULA0	DNPEP	Aspartyl aminopeptidase	0.0111732	0.703099	0.367068	-0.5082	0.4353	0	0.734463	2.88985e+06	2.12249e+06	2.97745e+06	2.80226e+06	1.49878e+06	2.7462e+06
Q96NW4	ANKRD27	Ankyrin repeat domain-containing protein 27	0.00139665	0.703392	0.314704	-0.5076	0.5021	0	0.727085	255686	185906	259324	252049	137704	234108
O00584	RNASET2	Ribonuclease T2	0.0111732	0.70344	0.478798	-0.5075	0.3198	0	0.745735	728676	543399	620093	837258	740045	346754
P49755	TMED10	Transmembrane emp24 domain-containing protein 10	0.0921788	0.703733	0.226722	-0.5069	0.6445	0	0.688039	2.90152e+07	1.99636e+07	3.48149e+07	2.32155e+07	1.95654e+07	2.03618e+07
Q86SZ2	TRAPPC6B	Trafficking protein particle complex subunit 6B	0.0181564	0.703831	0.0724327	-0.5067	1.14	0	0.703374	1.59547e+06	1.12221e+06	1.68311e+06	1.50782e+06	1.02533e+06	1.21908e+06
Q9BUL8	PDCD10	Programmed cell death protein 10	0.0125698	0.704026	0.0947666	-0.5063	1.023	0	0.70284	8761450	6.1579e+06	9.54367e+06	7.97923e+06	6.62002e+06	5.69577e+06
Q9ULM6	CNOT6	CCR4-NOT transcription complex subunit 6	0.00139665	0.704758	0.152802	-0.5048	0.8159	0	0.712659	465799	331956	470398	461200	280659	383253
Q16795	NDUFA9	NADH dehydrogenase [ubiquinone] 1 alpha subcomplex subunit 9, mitochondrial	0.0488827	0.704758	0.430366	-0.5048	0.3662	0	0.725072	1.76363e+07	1.27876e+07	2.10174e+07	1.42551e+07	9.03939e+06	1.65358e+07
Q9HAD4	WDR41	WD repeat-containing protein 41	0.0265363	0.704856	0.649354	-0.5046	0.1875	0	0.862058	1.68588e+06	1.45333e+06	1.78249e+06	1.58928e+06	614179	2.29248e+06
Q96EL2	MRPS24	28S ribosomal protein S24, mitochondrial	0.0167598	0.705198	0.264519	-0.5039	0.5775	0	0.71145	667524	474910	755590	579458	388362	561458
P60983	GMFB	Glia maturation factor beta	0.0181564	0.706372	0.247363	-0.5015	0.6067	0	0.71383	4.24307e+06	3.02883e+06	3.73812e+06	4.74803e+06	3.56353e+06	2.49414e+06
Q9H3P2	NELFA	Negative elongation factor A	0.0782123	0.706519	0.149252	-0.5012	0.8261	0	0.709868	1.15777e+07	8.21867e+06	1.0806e+07	1.23494e+07	7.10174e+06	9.33559e+06
O15269	SPTLC1	Serine palmitoyltransferase 1	0.0432961	0.706568	0.482877	-0.5011	0.3162	0	0.76076	3.42177e+06	2.60315e+06	3705360	3.13819e+06	1.61982e+06	3.58647e+06
Q9HD26	GOPC	Golgi-associated PDZ and coiled-coil motif-containing protein	0.0125698	0.706666	0.234395	-0.5009	0.6301	0	0.721294	814177	587262	812339	816016	467864	706659
Q99614	TTC1	Tetratricopeptide repeat protein 1	0.0572626	0.706813	0.0157225	-0.5006	1.803	0	0.705433	1.67009e+06	1.17814e+06	1.60549e+06	1.73469e+06	1.20665e+06	1.14963e+06
Q9Y4P1	ATG4B	Cysteine protease ATG4B	0.0027933	0.706911	0.613276	-0.5004	0.2123	0	0.789182	3.22851e+06	2.54788e+06	2.48697e+06	3.97004e+06	1.30069e+06	3.79507e+06
Q9GZN8	C20orf27	UPF0687 protein C20orf27	0.0167598	0.707352	0.17612	-0.4995	0.7542	0	0.703591	1.66389e+06	1170695	1.44324e+06	1.88453e+06	1.28927e+06	1.05212e+06
Q8TBA6	GOLGA5	Golgin subfamily A member 5	0.0935754	0.707548	0.222684	-0.4991	0.6523	0	0.721724	122407	88343.9	128065	116748	71404.4	105283
O43399	TPD52L2	Tumor protein D54	0.0949721	0.707597	0.11227	-0.499	0.9497	0	0.711828	9.80868e+06	6.98209e+06	9.23619e+06	1.03812e+07	7.76423e+06	6.19995e+06
Q9NR48	ASH1L	Histone-lysine N-methyltransferase ASH1L	0.00698324	0.708039	0.27098	-0.4981	0.5671	0	0.725013	58045076	42083452	60684108	55406044	32773768	51393136
P15104	GLUL	Glutamine synthetase	0.0810056	0.708088	0.343649	-0.498	0.4639	0	0.726319	4.90373e+06	3.56167e+06	5458700	4.34876e+06	2.66787e+06	4.45548e+06
Q9NTX5	ECHDC1	Ethylmalonyl-CoA decarboxylase	0.0167598	0.708235	0.533125	-0.4977	0.2732	0	0.764365	8.08384e+06	6.17901e+06	9.4181e+06	6.74958e+06	3.66505e+06	8.69297e+06
P49591	SARS1	Serine--tRNA ligase, cytoplasmic	0.0782123	0.708284	0.1302	-0.4976	0.8854	0	0.709413	4.14918e+07	2.94348e+07	3.75208e+07	4.54628e+07	3.23305e+07	2.65392e+07
Q5TG30	ARHGAP40	Rho GTPase-activating protein 40	0	0.708333	0.392596	-0.4975	0.4061	0	0.674673	7.12195e+06	4.80498e+06	9300725	4943166	5.00403e+06	4605935
P10155	RO60	RNA-binding protein RO60	0.051676	0.708579	0.538352	-0.497	0.2689	0	0.727076	2.84183e+07	2.06622e+07	3.64659e+07	2.03706e+07	13377288	2.79472e+07
Q9Y371	SH3GLB1	Endophilin-B1	0.0418994	0.709119	0.0255803	-0.4959	1.592	0	0.706802	2.50195e+06	1.76838e+06	2.36268e+06	2.64121e+06	1771704	1.76506e+06
Q9Y343	SNX24	Sorting nexin-24	0.00837989	0.709512	0.548939	-0.4951	0.2605	0	0.767641	151942	116637	123743	180141	68144.6	165129
Q9BY43	CHMP4A	Charged multivesicular body protein 4a	0.00418994	0.70966	0.328593	-0.4948	0.4833	0	0.707213	1.40931e+06	996685	1.13111e+06	1.68752e+06	821891	1.17148e+06
Q92575	UBXN4	UBX domain-containing protein 4	0.0391061	0.709857	0.00171711	-0.4944	2.765	0	0.709108	486027	344646	482354	489701	340576	348716
Q16342	PDCD2	Programmed cell death protein 2	0.0027933	0.709906	0.310537	-0.4943	0.5079	0	0.709371	919858	652520	1.08795e+06	751762	540057	764983
Q7Z6J9	TSEN54	tRNA-splicing endonuclease subunit Sen54	0	0.7103	0.19256	-0.4935	0.7154	0	0.708811	912131	646529	1.03147e+06	792788	569719	723338
Q9C0D9	SELENOI	Ethanolaminephosphotransferase 1	0.0167598	0.710989	0.326313	-0.4921	0.4864	0	0.735215	814700	598979	838380	791020	444634	753324
Q02750	MAP2K1	Dual specificity mitogen-activated protein kinase kinase 1	0.0446927	0.711236	0.449988	-0.4916	0.3468	0	0.706154	7.66308e+06	5.41131e+06	9.70557e+06	5.6206e+06	4.12029e+06	6.70234e+06
Q15155	NOMO1	BOS complex subunit NOMO1	0.0656425	0.711236	0.0910912	-0.4916	1.041	0	0.715684	8.52277e+06	6.09961e+06	8.45788e+06	8.58767e+06	6.76537e+06	5.43386e+06
Q8WVC6	DCAKD	Dephospho-CoA kinase domain-containing protein	0.0195531	0.711433	0.550308	-0.4912	0.2594	0	0.775977	2.59704e+06	2.01525e+06	2.99052e+06	2.20356e+06	1.16195e+06	2.86854e+06
Q99653	CHP1	Calcineurin B homologous protein 1	0.023743	0.71163	0.0653294	-0.4908	1.185	0	0.710634	1.29985e+06	923720	1.20057e+06	1.39914e+06	878056	969384
O75792	RNASEH2A	Ribonuclease H2 subunit A	0.0307263	0.71163	0.118912	-0.4908	0.9248	0	0.710692	1218338	865863	1.08962e+06	1.34706e+06	803461	928265
Q9H4A4	RNPEP	Aminopeptidase B	0.0698324	0.711778	0.524452	-0.4905	0.2803	0	0.710751	2.97844e+07	2.11693e+07	3.89915e+07	2.05774e+07	1.48119e+07	2.75267e+07
Q9Y696	CLIC4	Chloride intracellular channel protein 4	0.0642458	0.712469	0.357373	-0.4891	0.4469	0	0.685715	1.25417e+07	8.60001e+06	1.599e+07	9.09329e+06	8.24139e+06	8.95863e+06
Q01581	HMGCS1	Hydroxymethylglutaryl-CoA synthase, cytoplasmic	0.0544693	0.712568	0.501925	-0.4889	0.2994	0	0.652619	1.94841e+07	1.27157e+07	2.71336e+07	1.18346e+07	1.3168e+07	1.22634e+07
Q9ULV0	MYO5B	Unconventional myosin-Vb	0.0558659	0.712667	0.549203	-0.4887	0.2603	0	0.786987	6.1645e+07	4.85138e+07	5.54856e+07	6.78045e+07	6.95248e+07	2.75029e+07
Q02252	ALDH6A1	Methylmalonate-semialdehyde dehydrogenase [acylating], mitochondrial	0.0027933	0.713211	0.081099	-0.4876	1.091	0	0.714522	1.47935e+06	1.05703e+06	1.39821e+06	1.56049e+06	1.14843e+06	965628
O75251	NDUFS7	NADH dehydrogenase [ubiquinone] iron-sulfur protein 7, mitochondrial	0.0418994	0.713408	0.388667	-0.4872	0.4104	0	0.745863	6.04835e+06	4.51124e+06	6385275	5.71142e+06	3.18088e+06	5.84161e+06
P51649	ALDH5A1	Succinate-semialdehyde dehydrogenase, mitochondrial	0.0446927	0.713507	0.03539	-0.487	1.451	0	0.71563	4.86589e+06	3.48218e+06	4.98533e+06	4.74645e+06	3.27313e+06	3.69122e+06
Q9NX61	TMEM161A	Transmembrane protein 161A	0	0.713606	0.397688	-0.4868	0.4005	0	0.745173	578159	430829	623636	532683	302949	558709
O75844	ZMPSTE24	CAAX prenyl protease 1 homolog	0.0153631	0.713606	0.156836	-0.4868	0.8046	0	0.706398	1.45607e+07	1.02857e+07	1.67563e+07	1.23652e+07	1.02044e+07	1.03669e+07
Q9HDC9	APMAP	Adipocyte plasma membrane-associated protein	0.0530726	0.713804	0.0474728	-0.4864	1.324	0	0.713044	9.46308e+06	6.74759e+06	8.92465e+06	1.00015e+07	7.0854e+06	6.40978e+06
Q96CB8	INTS12	Integrator complex subunit 12	0.0949721	0.713903	0.741502	-0.4862	0.1299	0	0.795109	472494	375684	699991	244997	143880	607489
Q7Z7F7	MRPL55	39S ribosomal protein L55, mitochondrial	0.0432961	0.714002	0.457026	-0.486	0.3401	0	0.758444	3.60704e+06	2.73574e+06	3.88201e+06	3.33207e+06	1.79208e+06	3.6794e+06
O75648	TRMU	Mitochondrial tRNA-specific 2-thiouridylase 1	0.00698324	0.714299	0.438882	-0.4854	0.3577	0	0.70989	675941	479844	848171	503710	368916	590772
Q13627	DYRK1A	Dual specificity tyrosine-phosphorylation-regulated kinase 1A	0	0.714646	0.0111635	-0.4847	1.952	0	0.715389	1.64922e+06	1.17984e+06	1.59478e+06	1.70367e+06	1.16484e+06	1.19483e+06
O75419	CDC45	Cell division control protein 45 homolog	0.0223464	0.714646	0.538173	-0.4847	0.2691	0	0.786645	2.88068e+06	2.26607e+06	3.07568e+06	2.68568e+06	1.3053e+06	3.22685e+06
P31350	RRM2	Ribonucleoside-diphosphate reductase subunit M2	0.0893855	0.714794	0.453823	-0.4844	0.3431	0	0.669732	1.10564e+07	7.40485e+06	1.49113e+07	7.20157e+06	7.27379e+06	7.5359e+06
Q9Y315	DERA	Deoxyribose-phosphate aldolase	0.0139665	0.714992	0.353163	-0.484	0.452	0	0.740323	2.64488e+06	1.95806e+06	2.84271e+06	2.44705e+06	1.44197e+06	2.47416e+06
Q9Y399	MRPS2	28S ribosomal protein S2, mitochondrial	0.0907821	0.715141	0.29499	-0.4837	0.5302	0	0.727114	9.62533e+06	6.99871e+06	8.70392e+06	1.05467e+07	5.48658e+06	8.51084e+06
Q96KP1	EXOC2	Exocyst complex component 2	0.00698324	0.71524	0.522922	-0.4835	0.2816	0	0.783258	6.26526e+06	4.90732e+06	6.55145e+06	5.97908e+06	2.90319e+06	6.91144e+06
Q08209	PPP3CA	Protein phosphatase 3 catalytic subunit alpha	0.0432961	0.71524	0.0207262	-0.4835	1.683	0	0.715782	3.93377e+06	2.81572e+06	4.05934e+06	3.8082e+06	2916772	2.71468e+06
Q9UHG3	PCYOX1	Prenylcysteine oxidase 1	0.00837989	0.715439	0.423766	-0.4831	0.3729	0	0.757637	1.80757e+06	1.36948e+06	1.84705e+06	1.76809e+06	1.8133e+06	925664
O75150	RNF40	E3 ubiquitin-protein ligase BRE1B	0.0698324	0.715687	0.461473	-0.4826	0.3359	0	0.764527	7.57857e+06	5.79402e+06	7.33605e+06	7.82108e+06	3.75222e+06	7.83582e+06
Q7L1Q6	BZW1	eIF5-mimic protein 2	0.0488827	0.715935	0.0171632	-0.4821	1.765	0	0.718572	1.47352e+07	1.05883e+07	1.40834e+07	15387064	1.06433e+07	1.05333e+07
O15126	SCAMP1	Secretory carrier-associated membrane protein 1	0.0265363	0.716233	0.356423	-0.4815	0.448	0	0.741032	1.2172e+06	901981	1.18375e+06	1.25064e+06	658305	1.14566e+06
Q9BRJ6	C7orf50	Uncharacterized protein C7orf50	0.0865922	0.71658	0.107109	-0.4808	0.9702	0	0.718768	4.79149e+06	3.44397e+06	4.50907e+06	5.07391e+06	3.08728e+06	3.80066e+06
O94887	FARP2	FERM, ARHGEF and pleckstrin domain-containing protein 2	0.0027933	0.717027	0.37299	-0.4799	0.4283	0	0.68579	1.76249e+06	1.2087e+06	1.26379e+06	2.26119e+06	1215279	1.20211e+06
O95801	TTC4	Tetratricopeptide repeat protein 4	0.00418994	0.717226	0.392416	-0.4795	0.4063	0	0.71352	1.46466e+07	1.04506e+07	18012462	1.12807e+07	8.36513e+06	1.25361e+07
Q13951	CBFB	Core-binding factor subunit beta	0.00558659	0.717773	0.487061	-0.4784	0.3124	0	0.767177	988180	758108	1.06025e+06	916112	1.03557e+06	480644
Q6P161	MRPL54	39S ribosomal protein L54, mitochondrial	0.0907821	0.717873	0.143993	-0.4782	0.8417	0	0.724498	3.24216e+06	2.34894e+06	3.12925e+06	3.35506e+06	2.03236e+06	2.66551e+06
P09848	LCT	Lactase/phlorizin hydrolase	0.00139665	0.718072	0.12472	-0.4778	0.9041	0	0.712331	5.67898e+06	4.04532e+06	4947283	6410674	4020628	4.07e+06
Q92614	MYO18A	Unconventional myosin-XVIIIa	0.0349162	0.718072	0.504011	-0.4778	0.2976	0	0.742003	1.02823e+07	7.62951e+06	1.26008e+07	7.96382e+06	1.01371e+07	5.12195e+06
Q3SXM5	HSDL1	Inactive hydroxysteroid dehydrogenase-like protein 1	0.0125698	0.718122	0.488537	-0.4777	0.3111	0	0.743028	1.39677e+06	1.03784e+06	1678664	1.11487e+06	701632	1.37404e+06
P53701	HCCS	Holocytochrome c-type synthase	0.0405028	0.718271	0.150578	-0.4774	0.8222	0	0.724364	2.60969e+06	1.89037e+06	2.66452e+06	2.55486e+06	2.16208e+06	1.61865e+06
P35754	GLRX	Glutaredoxin-1	0.0293296	0.718321	0.0703471	-0.4773	1.153	0	0.715687	593195	424542	541468	644921	437137	411946
O14828	SCAMP3	Secretory carrier-associated membrane protein 3	0.0782123	0.71847	0.545063	-0.477	0.2636	0	0.79214	5.46494e+06	4.329e+06	5.79381e+06	5.13607e+06	2.49117e+06	6.16683e+06
Q96S44	TP53RK	EKC/KEOPS complex subunit TP53RK	0.00977654	0.71862	0.694478	-0.4767	0.1583	0	0.829941	4.77316e+06	3.96144e+06	6.29702e+06	3.2493e+06	1.69904e+06	6.22385e+06
Q9H832	UBE2Z	Ubiquitin-conjugating enzyme E2 Z	0.0125698	0.718719	0.585605	-0.4765	0.2324	0	0.774718	3.20522e+06	2.48314e+06	3.93709e+06	2.47336e+06	1.42342e+06	3.54287e+06
Q9NYB0	TERF2IP	Telomeric repeat-binding factor 2-interacting protein 1	0.0391061	0.719118	0.499599	-0.4757	0.3014	0	0.77488	826255	640249	774401	878110	397837	882661
O60925	PFDN1	Prefoldin subunit 1	0.0782123	0.719217	0.119647	-0.4755	0.9221	0	0.721047	4.76927e+06	3.43887e+06	4.4641e+06	5.07444e+06	3.80982e+06	3.06792e+06
Q99584	S100A13	Protein S100-A13	0.00698324	0.719267	0.519389	-0.4754	0.2845	0	0.673469	4.11146e+06	2.76894e+06	2.56077e+06	5.66214e+06	3.19287e+06	2.34501e+06
Q5XKP0	MICOS13	MICOS complex subunit MIC13	0.0209497	0.719567	0.228238	-0.4748	0.6416	0	0.730661	6.06932e+06	4.43461e+06	6.35491e+06	5.78373e+06	3.62009e+06	5.24913e+06
Q13505	MTX1	Metaxin-1	0.0181564	0.720065	0.207649	-0.4738	0.6827	0	0.715762	1.48215e+06	1.06087e+06	1.70677e+06	1.25754e+06	963058	1.15868e+06
Q96LB3	IFT74	Intraflagellar transport protein 74 homolog	0.0363128	0.720065	0.20727	-0.4738	0.6835	0	0.722443	327278	236440	362430	292127	202741	270139
Q14166	TTLL12	Tubulin--tyrosine ligase-like protein 12	0.0614525	0.720265	0.530593	-0.4734	0.2752	0	0.685535	3.72213e+07	2.55165e+07	5.08904e+07	2.35522e+07	2.03197e+07	30713313
P23919	DTYMK	Thymidylate kinase	0.0209497	0.720515	0.206258	-0.4729	0.6856	0	0.721813	1.13445e+07	8.18864e+06	9.99806e+06	1.2691e+07	9.25797e+06	7.11931e+06
Q9NVU0	POLR3E	DNA-directed RNA polymerase III subunit RPC5	0.00418994	0.720615	0.529634	-0.4727	0.276	0	0.721511	1.12323e+06	810423	1.45797e+06	788485	568857	1.05199e+06
Q6ZR37	PLEKHG7	Pleckstrin homology domain-containing family G member 7	0	0.720914	0.428839	-0.4721	0.3677	0	0.729827	392433	286408	474270	310595	214345	358472
Q9H974	QTRT2	Queuine tRNA-ribosyltransferase accessory subunit 2	0.0111732	0.721114	0.173521	-0.4717	0.7606	0	0.72765	894105	650595	945954	842255	555966	745224
Q9H944	MED20	Mediator of RNA polymerase II transcription subunit 20	0.0153631	0.721614	0.172121	-0.4707	0.7642	0	0.725633	567112	411515	518610	615613	358040	464989
Q14147	DHX34	Probable ATP-dependent RNA helicase DHX34	0.0027933	0.721714	0.359583	-0.4705	0.4442	0	0.744546	808621	602056	869959	747283	445552	758559
P22681	CBL	E3 ubiquitin-protein ligase CBL	0.0251397	0.721915	0.0702041	-0.4701	1.154	0	0.722163	1.74857e+06	1.26275e+06	1.75465e+06	1.74248e+06	1.14858e+06	1.37693e+06
Q8TBC4	UBA3	NEDD8-activating enzyme E1 catalytic subunit	0.0195531	0.723367	0.604543	-0.4672	0.2186	0	0.638152	2.22346e+06	1.4189e+06	3.28477e+06	1.16214e+06	1.25816e+06	1.57964e+06
Q6P587	FAHD1	Acylpyruvase FAHD1, mitochondrial	0.00837989	0.723568	0.00728695	-0.4668	2.137	0	0.723303	399942	289280	403739	396146	296521	282038
Q5R3I4	TTC38	Tetratricopeptide repeat protein 38	0	0.723668	0.570864	-0.4666	0.2435	0	0.675318	6.42036e+06	4.33578e+06	9.03904e+06	3.80167e+06	3.43781e+06	5.23376e+06
Q8IY18	SMC5	Structural maintenance of chromosomes protein 5	0.00418994	0.723969	0.518219	-0.466	0.2855	0	0.781941	1.16394e+06	910130	1.05592e+06	1.27195e+06	560016	1.26025e+06
Q9BVK6	TMED9	Transmembrane emp24 domain-containing protein 9	0.0321229	0.724371	0.082563	-0.4652	1.083	0	0.72633	8.06956e+06	5.86116e+06	8.46518e+06	7.67394e+06	6.35759e+06	5.36473e+06
Q9BSF4	TIMM29	Mitochondrial import inner membrane translocase subunit Tim29	0.0139665	0.724722	0.343411	-0.4645	0.4642	0	0.750231	3.49523e+06	2.62223e+06	3.48782e+06	3.50264e+06	1.95304e+06	3.29141e+06
O75746	SLC25A12	Electrogenic aspartate/glutamate antiporter SLC25A12, mitochondrial	0.0921788	0.724923	0.357986	-0.4641	0.4461	0	0.747752	8.76871e+06	6.55681e+06	9.39914e+06	8.13827e+06	4.87838e+06	8.23525e+06
P53384	NUBP1	Cytosolic Fe-S cluster assembly factor NUBP1	0.0251397	0.725426	0.173349	-0.4631	0.7611	0	0.718755	1.10291e+06	792724	951289	1.25453e+06	735842	849605
O15144	ARPC2	Actin-related protein 2/3 complex subunit 2	0.099162	0.72613	0.473704	-0.4617	0.3245	0	0.682891	2.77087e+07	1.8922e+07	3.72161e+07	1.82012e+07	1.74794e+07	2.03646e+07
Q5R372	RABGAP1L	Rab GTPase-activating protein 1-like	0.0335196	0.726231	0.385936	-0.4615	0.4135	0	0.717126	271351	194593	333355	209346	160997	228188
Q9Y496	KIF3A	Kinesin-like protein KIF3A	0.0335196	0.726785	0.628785	-0.4604	0.2015	0	0.844359	1.37332e+06	1.15957e+06	1.44918e+06	1.29746e+06	569192	1.74995e+06
Q9BWH6	RPAP1	RNA polymerase II-associated protein 1	0.0405028	0.727642	0.402719	-0.4587	0.395	0	0.76117	2.67462e+06	2.03584e+06	2.73305e+06	2.6162e+06	1.44198e+06	2.62971e+06
Q8TB37	NUBPL	Iron-sulfur protein NUBPL	0.0027933	0.728197	0.320138	-0.4576	0.4947	0	0.739994	401290	296952	445264	357316	234248	359656
Q92547	TOPBP1	DNA topoisomerase 2-binding protein 1	0.023743	0.728247	0.295581	-0.4575	0.5293	0	0.746664	1.87412e+06	1.39934e+06	1.90533e+06	1.84292e+06	1.70735e+06	1.09133e+06
O00625	PIR	Pirin	0.0027933	0.728298	0.162652	-0.4574	0.7887	0	0.72419	670974	485912	585784	756163	520960	450865
Q4G0F5	VPS26B	Vacuolar protein sorting-associated protein 26B	0.00837989	0.728803	0.485751	-0.4564	0.3136	0	0.769972	960834	739815	1.06379e+06	857873	486087	993544
Q9BQP7	MGME1	Mitochondrial genome maintenance exonuclease 1	0.023743	0.729055	0.42289	-0.4559	0.3738	0	0.764702	1.65355e+06	1.26447e+06	1.58731e+06	1.71979e+06	1.64843e+06	880517
Q9UL54	TAOK2	Serine/threonine-protein kinase TAO2	0.00139665	0.729207	0.283142	-0.4556	0.548	0	0.727422	5.16377e+06	3.75624e+06	5.99839e+06	4329149	3.22365e+06	4.28883e+06
Q8IU81	IRF2BP1	Interferon regulatory factor 2-binding protein 1	0.0181564	0.729308	0.463351	-0.4554	0.3341	0	0.72883	1.33529e+06	973200	1.66041e+06	1.01017e+06	736538	1.20986e+06
Q5JTV8	TOR1AIP1	Torsin-1A-interacting protein 1	0.0963687	0.729814	0.201327	-0.4544	0.6961	0	0.740533	5.0369e+06	3.73e+06	5017742	5.05607e+06	3.10767e+06	4.35233e+06
Q14699	RFTN1	Raftlin	0.0139665	0.729965	0.221087	-0.4541	0.6554	0	0.718562	314345	225876	258997	369693	229663	222089
O75436	VPS26A	Vacuolar protein sorting-associated protein 26A	0.0558659	0.730016	0.170344	-0.454	0.7687	0	0.725562	9.72673e+06	7.05735e+06	1.10644e+07	8.38908e+06	6.6801e+06	7.4346e+06
Q0PNE2	ELP6	Elongator complex protein 6	0.0642458	0.730016	0.434409	-0.454	0.3621	0	0.750957	407511	306023	344965	470056	220831	391215
Q9NWV8	BABAM1	BRISC and BRCA1-A complex member 1	0.0586592	0.730623	0.463494	-0.4528	0.334	0	0.774043	1.26432e+06	978638	1.28273e+06	1245909	651909	1.30537e+06
P16333	NCK1	Cytoplasmic protein NCK1	0.0824022	0.730775	0.605462	-0.4525	0.2179	0	0.831892	1.0053e+06	836304	988874	1.02173e+06	1.23462e+06	437985
P0C2W1	FBXO45	F-box/SPRY domain-containing protein 1	0.0125698	0.730978	0.0569657	-0.4521	1.244	0	0.731099	698474	510654	659435	737513	483203	538105
O75880	SCO1	Protein SCO1 homolog, mitochondrial	0.0251397	0.731231	0.251551	-0.4516	0.5994	0	0.740366	5.18437e+06	3.83833e+06	5.60311e+06	4.76564e+06	3.15936e+06	4517309
Q9NZJ7	MTCH1	Mitochondrial carrier homolog 1	0.0139665	0.731434	0.65288	-0.4512	0.1852	0	0.864006	1.62922e+06	1.40766e+06	1.64449e+06	1.61395e+06	654320	2.16099e+06
Q9NSK0	KLC4	Kinesin light chain 4	0.0656425	0.732449	0.678403	-0.4492	0.1685	0	0.820171	704984	578207	499665	910302	277979	878436
Q5TDH0	DDI2	Protein DDI1 homolog 2	0.0223464	0.732754	0.161063	-0.4486	0.793	0	0.726742	4.54266e+06	3.30134e+06	3.93272e+06	5.1526e+06	3448850	3.15383e+06
Q96EL3	MRPL53	39S ribosomal protein L53, mitochondrial	0.0586592	0.732957	0.321604	-0.4482	0.4927	0	0.750178	2.65698e+06	1.99321e+06	2465674	2.84829e+06	1.54961e+06	2436813
Q9Y294	ASF1A	Histone chaperone ASF1A	0.0446927	0.733211	0.0553686	-0.4477	1.257	0	0.730896	3.46218e+06	2.53049e+06	3.71971e+06	3.20465e+06	2.49928e+06	2.56171e+06
P48147	PREP	Prolyl endopeptidase	0.0111732	0.733262	0.427341	-0.4476	0.3692	0	0.701125	3.40951e+07	2.3905e+07	4.43335e+07	2.38567e+07	2.53357e+07	2.24742e+07
P35503	UGT1A3	UDP-glucuronosyltransferase 1A3	0	0.733312	0.246856	-0.4475	0.6076	0	0.731203	4.19885e+07	3.07022e+07	4.7934e+07	3.60431e+07	2.67567e+07	3.46476e+07
O43676	NDUFB3	NADH dehydrogenase [ubiquinone] 1 beta subcomplex subunit 3	0	0.733618	0.0964462	-0.4469	1.016	0	0.739097	1.90137e+06	1.4053e+06	1.91583e+06	1.8869e+06	1.55379e+06	1.2568e+06
Q96E52	OMA1	Metalloendopeptidase OMA1, mitochondrial	0	0.733618	0.114872	-0.4469	0.9398	0	0.737455	391979	289067	408051	375908	258034	320101
Q13084	MRPL28	39S ribosomal protein L28, mitochondrial	0.0586592	0.734228	0.492333	-0.4457	0.3077	0	0.778824	9.39636e+06	7.3181e+06	8.58498e+06	1.02077e+07	4.78573e+06	9.85047e+06
Q92947	GCDH	Glutaryl-CoA dehydrogenase, mitochondrial	0.0335196	0.734279	0.427535	-0.4456	0.369	0	0.768809	6.39726e+06	4.91827e+06	6.76522e+06	6.02931e+06	3.45432e+06	6.38222e+06
Q5VZK9	CARMIL1	F-actin-uncapping protein LRRC16A	0.0586592	0.734482	0.462277	-0.4452	0.3351	0	0.764322	2.20016e+06	1.68163e+06	2498451	1.90187e+06	1.17083e+06	2.19243e+06
O75915	ARL6IP5	PRA1 family protein 3	0.023743	0.735094	0.164223	-0.444	0.7846	0	0.73878	7.07304e+06	5.22542e+06	6.54848e+06	7.5976e+06	5.85639e+06	4.59445e+06
Q96JP5	ZFP91	E3 ubiquitin-protein ligase ZFP91	0.0446927	0.736011	0.362658	-0.4422	0.4405	0	0.758439	3.09381e+06	2.34646e+06	2.93078e+06	3.25684e+06	1.75528e+06	2.93765e+06
Q6ZTR5	CFAP47	Cilia- and flagella-associated protein 47	0.00139665	0.736113	0.463965	-0.442	0.3335	0	0.75159	6.21255e+06	4.66929e+06	7.39756e+06	5027531	3.3854e+06	5953177
Q96TA2	YME1L1	ATP-dependent zinc metalloprotease YME1L1	0.0391061	0.737543	0.395429	-0.4392	0.4029	0	0.767166	5.54786e+06	4.25613e+06	5.59414e+06	5.50158e+06	3.07994e+06	5.43231e+06
Q9BW83	IFT27	Intraflagellar transport protein 27 homolog	0.0139665	0.737748	0.216196	-0.4388	0.6652	0	0.732837	3.29399e+06	2.41395e+06	2.81969e+06	3.76829e+06	2.20033e+06	2.62758e+06
Q8ND24	RNF214	RING finger protein 214	0.0502793	0.737748	0.0528508	-0.4388	1.277	0	0.739048	7.86008e+06	5.80898e+06	7.54735e+06	8.17281e+06	5.45369e+06	6.16427e+06
P26440	IVD	Isovaleryl-CoA dehydrogenase, mitochondrial	0.0349162	0.737901	0.248463	-0.4385	0.6047	0	0.7507	3.72179e+06	2.79395e+06	3.58484e+06	3.85874e+06	2.28386e+06	3.30403e+06
Q96AX1	VPS33A	Vacuolar protein sorting-associated protein 33A	0.0027933	0.738004	0.322422	-0.4383	0.4916	0	0.738369	1.09082e+06	805428	1.26912e+06	912526	673660	937195
Q9Y5Y2	NUBP2	Cytosolic Fe-S cluster assembly factor NUBP2	0.0921788	0.73826	0.522291	-0.4378	0.2821	0	0.794966	2.71099e+06	2.15514e+06	2.60493e+06	2.81704e+06	1.34889e+06	2.96139e+06
P48163	ME1	NADP-dependent malic enzyme	0.0377095	0.738362	0.27255	-0.4376	0.5646	0	0.745269	1.2926e+06	963332	1.18117e+06	1.40402e+06	1.137e+06	789666
Q9BYC9	MRPL20	39S ribosomal protein L20, mitochondrial	0.0321229	0.73872	0.474742	-0.4369	0.3235	0	0.773677	8.68827e+06	6.72192e+06	7.73336e+06	9.64318e+06	4.58693e+06	8856906
Q969Z0	TBRG4	FAST kinase domain-containing protein 4	0.0307263	0.738976	0.47394	-0.4364	0.3243	0	0.750306	1.641e+07	1.23125e+07	1.97751e+07	1.30448e+07	9.0097e+06	1.56153e+07
Q8IXM3	MRPL41	39S ribosomal protein L41, mitochondrial	0.0935754	0.738976	0.499832	-0.4364	0.3012	0	0.786504	1.15258e+07	9.06511e+06	1.13277e+07	1.1724e+07	5.87137e+06	1.22588e+07
Q15345	LRRC41	Leucine-rich repeat-containing protein 41	0.0600559	0.739232	0.139141	-0.4359	0.8565	0	0.737641	1.67454e+06	1.23521e+06	1.53921e+06	1.80987e+06	1.11534e+06	1.35508e+06
Q13042	CDC16	Cell division cycle protein 16 homolog	0.0321229	0.739694	0.496087	-0.435	0.3044	0	0.781188	263682	205985	292527	234837	137033	274937
Q9BSJ2	TUBGCP2	Gamma-tubulin complex component 2	0.0572626	0.739899	0.413566	-0.4346	0.3835	0	0.760896	1.11436e+07	8.47912e+06	1.2663e+07	9.62417e+06	6.30837e+06	1.06499e+07
P09001	MRPL3	39S ribosomal protein L3, mitochondrial	0.0544693	0.73995	0.481952	-0.4345	0.317	0	0.732259	1.71037e+07	1.25244e+07	1.25875e+07	21620009	9.74294e+06	1.53058e+07
Q13526	PIN1	Peptidyl-prolyl cis-trans isomerase NIMA-interacting 1	0.0796089	0.73995	0.0239807	-0.4345	1.62	0	0.740944	3.60394e+06	2.67032e+06	3.66263e+06	3.54525e+06	2.79072e+06	2.54991e+06
Q9BYB4	GNB1L	Guanine nucleotide-binding protein subunit beta-like protein 1	0.0488827	0.740463	0.560706	-0.4335	0.2513	0	0.802157	1.16367e+06	933442	1.06465e+06	1.26268e+06	559384	1.3075e+06
O95295	SNAPIN	SNARE-associated protein Snapin	0.0586592	0.740771	0.102584	-0.4329	0.9889	0	0.744545	1.35318e+06	1.0075e+06	1.35264e+06	1.35371e+06	901432	1.11357e+06
P10620	MGST1	Microsomal glutathione S-transferase 1	0.00139665	0.741028	0.523	-0.4324	0.2815	0	0.779133	2642160	2058594	3.04257e+06	2.24175e+06	1.3459e+06	2.77129e+06
P79522	PRR3	Proline-rich protein 3	0.0418994	0.741182	0.591952	-0.4321	0.2277	0	0.798488	471714	376657	557343	386084	531673	221642
P18074	ERCC2	General transcription and DNA repair factor IIH helicase subunit XPD	0.00139665	0.741593	0.606736	-0.4313	0.217	0	0.823229	2.52489e+06	2.07856e+06	2.81115e+06	2.23863e+06	1.14573e+06	3.0114e+06
P22570	FDXR	NADPH:adrenodoxin oxidoreductase, mitochondrial	0.0307263	0.742107	0.608655	-0.4303	0.2156	0	0.831034	2.38598e+06	1.98283e+06	2.24402e+06	2.52794e+06	1.07523e+06	2.89043e+06
Q9H7D7	WDR26	WD repeat-containing protein 26	0.0837989	0.742107	0.395575	-0.4303	0.4028	0	0.758217	3.26496e+06	2.47555e+06	3.69409e+06	2.83583e+06	1.88327e+06	3.06782e+06
Q13190	STX5	Syntaxin-5	0.0153631	0.742416	0.567353	-0.4297	0.2461	0	0.786482	5.45486e+06	4.29014e+06	6.48856e+06	4.42115e+06	2.67535e+06	5.90494e+06
Q15528	MED22	Mediator of RNA polymerase II transcription subunit 22	0.00139665	0.742468	0.225434	-0.4296	0.647	0	0.74167	337894	250606	299321	376466	218627	282584
P22830	FECH	Ferrochelatase, mitochondrial	0.0209497	0.742622	0.645216	-0.4293	0.1903	0	0.809992	3.07423e+06	2.4901e+06	3.83034e+06	2.31812e+06	1.35232e+06	3.62788e+06
Q96SN8	CDK5RAP2	CDK5 regulatory subunit-associated protein 2	0.0153631	0.743395	0.133463	-0.4278	0.8746	0	0.746726	1.03379e+06	771957	1.08999e+06	977584	854574	689340
P50748	KNTC1	Kinetochore-associated protein 1	0.0670391	0.744271	0.454347	-0.4261	0.3426	0	0.778182	2.36304e+06	1.83887e+06	2.58821e+06	2.13787e+06	1.29416e+06	2.38358e+06
Q4J6C6	PREPL	Prolyl endopeptidase-like	0.00977654	0.744477	0.622557	-0.4257	0.2058	0	0.758278	1.77685e+06	1.34735e+06	2.35731e+06	1.1964e+06	853338	1.84136e+06
O14920	IKBKB	Inhibitor of nuclear factor kappa-B kinase subunit beta	0	0.744787	0.385324	-0.4251	0.4142	0	0.770238	936833	721584	973369	900297	535361	907807
Q9H2H9	SLC38A1	Sodium-coupled neutral amino acid symporter 1	0.0349162	0.7452	0.130033	-0.4243	0.8859	0	0.749909	677496	508060	695546	659447	450070	566050
P36507	MAP2K2	Dual specificity mitogen-activated protein kinase kinase 2	0.0377095	0.745355	0.519384	-0.424	0.2845	0	0.754681	1.28933e+07	9.73033e+06	1.5959e+07	9.8276e+06	6991885	1.24688e+07
Q8IZ81	ELMOD2	ELMO domain-containing protein 2	0.00418994	0.746234	0.632285	-0.4223	0.1991	0	0.810704	3.99819e+06	3.24135e+06	4.86433e+06	3.13206e+06	1.80597e+06	4.67673e+06
Q9H8Y8	GORASP2	Golgi reassembly-stacking protein 2	0.0418994	0.746286	0.247801	-0.4222	0.6059	0	0.755786	2.14732e+06	1.62291e+06	2.27685e+06	2.01778e+06	1.89721e+06	1.34861e+06
Q9BVC6	TMEM109	Transmembrane protein 109	0.0907821	0.746441	0.169816	-0.4219	0.77	0	0.749799	4.12635e+06	3.09393e+06	3.85019e+06	4.40252e+06	3.47158e+06	2716285
Q16864	ATP6V1F	V-type proton ATPase subunit F	0.00837989	0.747062	0.012921	-0.4207	1.889	0	0.74613	2.03613e+06	1.51922e+06	2.09121e+06	1.98106e+06	1.55225e+06	1.48619e+06
O43583	DENR	Density-regulated protein	0.0726257	0.747166	0.21842	-0.4205	0.6607	0	0.739967	2.7827e+06	2.05911e+06	2.35855e+06	3.20686e+06	2.17952e+06	1.9387e+06
Q9BZX2	UCK2	Uridine-cytidine kinase 2	0.0223464	0.747269	0.223542	-0.4203	0.6506	0	0.748243	5.59781e+06	4.18852e+06	6.20404e+06	4991583	3.65846e+06	4718585
P46926	GNPDA1	Glucosamine-6-phosphate isomerase 1	0.027933	0.747684	0.179027	-0.4195	0.7471	0	0.746567	5.78932e+06	4.32212e+06	5.17845e+06	6.40019e+06	4.73758e+06	3.90666e+06
O00308	WWP2	NEDD4-like E3 ubiquitin-protein ligase WWP2	0.0265363	0.747736	0.292614	-0.4194	0.5337	0	0.742293	770357	571831	898924	641790	638756	504906
P61803	DAD1	Dolichyl-diphosphooligosaccharide--protein glycosyltransferase subunit DAD1	0.0377095	0.74815	0.0207538	-0.4186	1.683	0	0.748319	7.46687e+06	5.5876e+06	7.65815e+06	7.2756e+06	5.77673e+06	5.39848e+06
P54920	NAPA	Alpha-soluble NSF attachment protein	0.0265363	0.748617	0.010995	-0.4177	1.959	0	0.748755	6.73449e+06	5.04249e+06	6.54048e+06	6.92851e+06	5.09001e+06	4.99497e+06
Q9Y6E2	BZW2	eIF5-mimic protein 1	0.0307263	0.748773	0.203379	-0.4174	0.6917	0	0.757801	2.0378e+07	1.54425e+07	19881123	2.08749e+07	1.31333e+07	1.77516e+07
Q9H7L9	SUDS3	Sin3 histone deacetylase corepressor complex component SDS3	0.0349162	0.748825	0.49235	-0.4173	0.3077	0	0.794316	680011	540144	692791	667232	360094	720193
Q9UEW8	STK39	STE20/SPS1-related proline-alanine-rich protein kinase	0.0349162	0.749136	0.617034	-0.4167	0.2097	0	0.837809	1.4331e+06	1.20067e+06	1.38194e+06	1.48426e+06	654642	1.74669e+06
O14618	CCS	Copper chaperone for superoxide dismutase	0.0125698	0.7495	0.502485	-0.416	0.2989	0	0.705019	895877	631610	590687	1.20107e+06	650827	612394
Q9P289	STK26	Serine/threonine-protein kinase 26	0.0572626	0.750123	0.312625	-0.4148	0.505	0	0.74077	1.26061e+07	9.33822e+06	1.50137e+07	1.01985e+07	8.44123e+06	1.02352e+07
Q9H4I9	SMDT1	Essential MCU regulator, mitochondrial	0	0.750592	0.436659	-0.4139	0.3599	0	0.781057	345661	269981	321525	369798	193953	346009
Q96IG2	FBXL20	F-box/LRR-repeat protein 20	0	0.750956	0.151585	-0.4132	0.8193	0	0.748796	2.25665e+06	1.68977e+06	2.02928e+06	2.48403e+06	1.55661e+06	1.82294e+06
P51668	UBE2D1	Ubiquitin-conjugating enzyme E2 D1	0.00558659	0.75106	0.296913	-0.413	0.5274	0	0.756711	1.36378e+06	1.03199e+06	1530798	1196769	863275	1.20071e+06
Q9NZW5	PALS2	Protein PALS2	0.0139665	0.751112	0.562179	-0.4129	0.2501	0	0.758472	765293	580454	971618	558969	405615	755292
Q8IXH7	NELFCD	Negative elongation factor C/D	0.0712291	0.751633	0.155173	-0.4119	0.8092	0	0.745771	3.68357e+06	2.7471e+06	4.14367e+06	3.22348e+06	2.68244e+06	2.81177e+06
Q96HB5	CCDC120	Coiled-coil domain-containing protein 120	0	0.751685	0.595495	-0.4118	0.2251	0	0.790902	605830	479152	742060	469600	299065	659240
Q9BVC4	MLST8	Target of rapamycin complex subunit LST8	0.0111732	0.751998	0.330226	-0.4112	0.4812	0	0.769917	595915	458805	614193	577637	358635	558975
Q96RN5	MED15	Mediator of RNA polymerase II transcription subunit 15	0.0153631	0.75205	0.0836153	-0.4111	1.078	0	0.7496	296953	222596	271269	322636	223783	221408
Q08378	GOLGA3	Golgin subfamily A member 3	0.0712291	0.752258	0.257772	-0.4107	0.5888	0	0.745491	5.90654e+06	4.40327e+06	6.82959e+06	4.9835e+06	4.0073e+06	4.79924e+06
Q9NV35	NUDT15	Nucleotide triphosphate diphosphatase NUDT15	0.00558659	0.752571	0.405914	-0.4101	0.3916	0	0.725657	727399	527842	920424	534373	522247	533437
O00506	STK25	Serine/threonine-protein kinase 25	0.0642458	0.753041	0.351222	-0.4092	0.4544	0	0.758546	1.84088e+06	1.3964e+06	2.08423e+06	1.59753e+06	1.12632e+06	1.66647e+06
O15212	PFDN6	Prefoldin subunit 6	0.0614525	0.753302	0.128331	-0.4087	0.8917	0	0.757304	4.60844e+06	3.48999e+06	4.43893e+06	4.77794e+06	3.11502e+06	3.86496e+06
Q9BYD1	MRPL13	39S ribosomal protein L13, mitochondrial	0.0684358	0.753511	0.506758	-0.4083	0.2952	0	0.7889	1.1339e+07	8.94534e+06	9.91591e+06	1.27621e+07	6.10638e+06	1.17843e+07
O95551	TDP2	Tyrosyl-DNA phosphodiesterase 2	0.00698324	0.754713	0.000108822	-0.406	3.963	0	0.754118	558385	421089	560021	556750	420666	421511
Q12933	TRAF2	TNF receptor-associated factor 2	0.00977654	0.754975	0.253701	-0.4055	0.5957	0	0.767165	2.83083e+06	2.17171e+06	2.86257e+06	2.79908e+06	1.79363e+06	2.54979e+06
Q9BV68	RNF126	E3 ubiquitin-protein ligase RNF126	0.0125698	0.755132	0.304847	-0.4052	0.5159	0	0.770924	2.41895e+06	1.86482e+06	2358017	2.47988e+06	1.48941e+06	2.24024e+06
Q15018	ABRAXAS2	BRISC complex subunit Abraxas 2	0.0265363	0.755289	0.533251	-0.4049	0.2731	0	0.805862	1.1276e+06	908690	1.19038e+06	1.06482e+06	584841	1.23254e+06
P49366	DHPS	Deoxyhypusine synthase	0.0446927	0.755917	0.22257	-0.4037	0.6525	0	0.765564	421891	322984	415079	428703	374242	271727
Q96QG7	MTMR9	Myotubularin-related protein 9	0.00977654	0.756022	0.510145	-0.4035	0.2923	0	0.750194	129329	97021.6	162846	95811.1	74963.2	119080
Q9UH99	SUN2	SUN domain-containing protein 2	0.0488827	0.756599	0.269618	-0.4024	0.5693	0	0.769093	725581	558039	709217	741945	457342	658736
Q93100	PHKB	Phosphorylase b kinase regulatory subunit beta	0.027933	0.757281	0.779234	-0.4011	0.1083	0	1.03709	1.30124e+06	1.3495e+06	1.51009e+06	1.09238e+06	414139	2.28487e+06
Q9P2X3	IMPACT	Protein IMPACT	0.00139665	0.758857	0.398412	-0.3981	0.3997	0	0.766681	2.39279e+06	1.83451e+06	2.74306e+06	2.04252e+06	1.4504e+06	2.21861e+06
Q9HAS0	C17orf75	Protein Njmu-R1	0.0111732	0.759278	0.267933	-0.3973	0.572	0	0.756071	752654	569060	861757	643551	630353	507767
O96000	NDUFB10	NADH dehydrogenase [ubiquinone] 1 beta subcomplex subunit 10	0.0446927	0.759804	0.478273	-0.3963	0.3203	0	0.773303	5.8906e+06	4.55522e+06	6.93765e+06	4.84355e+06	3.39373e+06	5.7167e+06
P05423	POLR3D	DNA-directed RNA polymerase III subunit RPC4	0.0181564	0.760173	0.606943	-0.3956	0.2169	0	0.820101	1.52682e+06	1.25215e+06	1.75046e+06	1.30319e+06	746692	1.75761e+06
Q9NVS9	PNPO	Pyridoxine-5'-phosphate oxidase	0.027933	0.760648	0.0915698	-0.3947	1.038	0	0.75822	1.53072e+06	1.16062e+06	1.39683e+06	1.6646e+06	1.19255e+06	1.12868e+06
Q9P003	CNIH4	Protein cornichon homolog 4	0.075419	0.7607	0.402351	-0.3946	0.3954	0	0.785876	2504945	1.96858e+06	2507813	2502077	1.47156e+06	2.46559e+06
O60879	DIAPH2	Protein diaphanous homolog 2	0.0195531	0.762495	0.678678	-0.3912	0.1683	0	0.834376	3.04932e+06	2.54428e+06	3.81254e+06	2.28611e+06	1.35985e+06	3.72872e+06
A3KMH1	VWA8	von Willebrand factor A domain-containing protein 8	0.0111732	0.763235	0.53023	-0.3898	0.2755	0	0.810151	2.20321e+06	1.78493e+06	2.34535e+06	2.06106e+06	1.17853e+06	2.39132e+06
P17612	PRKACA	cAMP-dependent protein kinase catalytic subunit alpha	0.0600559	0.763235	0.533331	-0.3898	0.273	0	0.756249	9.98272e+06	7.54943e+06	1.2664e+07	7.30141e+06	5.81849e+06	9.28036e+06
O95163	ELP1	Elongator complex protein 1	0.0935754	0.763606	0.533577	-0.3891	0.2728	0	0.795523	2.96023e+07	2.35493e+07	3.41382e+07	2.50664e+07	1.60547e+07	3.10439e+07
Q53R41	FASTKD1	FAST kinase domain-containing protein 1, mitochondrial	0	0.763871	0.187474	-0.3886	0.7271	0	0.769691	2623345	2.01917e+06	2.74103e+06	2.50566e+06	1.76249e+06	2.27584e+06
Q13043	STK4	Serine/threonine-protein kinase 4	0.0335196	0.764029	0.39141	-0.3883	0.4074	0	0.74307	5.32895e+06	3.95978e+06	6.59786e+06	4.06003e+06	3.75908e+06	4.16047e+06
Q8N183	NDUFAF2	NADH dehydrogenase [ubiquinone] 1 alpha subcomplex assembly factor 2	0.00837989	0.764135	0.489493	-0.3881	0.3103	0	0.800696	2.40326e+06	1.92428e+06	2.24859e+06	2.55794e+06	2.51104e+06	1.33752e+06
O43776	NARS1	Asparagine--tRNA ligase, cytoplasmic	0.0893855	0.764135	0.336398	-0.3881	0.4731	0	0.768205	2.7121e+07	2.08345e+07	3.09604e+07	2.32815e+07	1.75317e+07	2.41372e+07
P45985	MAP2K4	Dual specificity mitogen-activated protein kinase kinase 4	0.0027933	0.76493	0.381707	-0.3866	0.4183	0	0.767909	909713	698577	1.05092e+06	768509	571540	825613
O75116	ROCK2	Rho-associated protein kinase 2	0.0502793	0.76493	0.684554	-0.3866	0.1646	0	0.880584	4.50637e+06	3.96824e+06	5.0503e+06	3.96244e+06	1.96464e+06	5.97183e+06
Q9H269	VPS16	Vacuolar protein sorting-associated protein 16 homolog	0.00698324	0.764983	0.509379	-0.3865	0.293	0	0.794532	1.72996e+06	1.37451e+06	1.97139e+06	1.48853e+06	964902	1.78411e+06
Q01658	DR1	Protein Dr1	0.0432961	0.765036	0.207741	-0.3864	0.6825	0	0.768982	1.77675e+06	1.36629e+06	1.70139e+06	1.85212e+06	1.55649e+06	1.17609e+06
O75582	RPS6KA5	Ribosomal protein S6 kinase alpha-5	0.0405028	0.765354	0.524046	-0.3858	0.2806	0	0.800299	502774	402370	567691	437858	276341	528398
O60232	ZNRD2	Protein ZNRD2	0.0167598	0.765461	0.469422	-0.3856	0.3284	0	0.80213	4.00645e+06	3.21369e+06	3.957e+06	4.05589e+06	2.27494e+06	4.15244e+06
P78330	PSPH	Phosphoserine phosphatase	0.0111732	0.765514	0.498223	-0.3855	0.3026	0	0.795313	4.20456e+06	3.34394e+06	3.70928e+06	4.69985e+06	4332300	2.35559e+06
O00116	AGPS	Alkyldihydroxyacetonephosphate synthase, peroxisomal	0.0782123	0.765567	0.633699	-0.3854	0.1981	0	0.832596	8.51985e+06	7.0936e+06	9.90533e+06	7.13438e+06	4.09525e+06	1.00919e+07
Q13952	NFYC	Nuclear transcription factor Y subunit gamma	0.00418994	0.765779	0.250197	-0.385	0.6017	0	0.775956	874724	678747	854648	894799	567696	789798
Q13613	MTMR1	Myotubularin-related protein 1	0.0391061	0.765885	0.365222	-0.3848	0.4374	0	0.764882	2.629e+06	2.01087e+06	3.07102e+06	2.18697e+06	1.69686e+06	2.32488e+06
Q14997	PSME4	Proteasome activator complex subunit 4	0.0223464	0.76631	0.502344	-0.384	0.299	0	0.730887	5.25967e+06	3.84423e+06	6.87476e+06	3.64458e+06	3.53194e+06	4.15651e+06
Q9HCN4	GPN1	GPN-loop GTPase 1	0.0670391	0.766629	0.0812477	-0.3834	1.09	0	0.769425	2.00384e+06	1.5418e+06	2.0815e+06	1.92618e+06	1.43085e+06	1.65276e+06
Q9HBE1	PATZ1	POZ-, AT hook-, and zinc finger-containing protein 1	0.0321229	0.766894	0.410129	-0.3829	0.3871	0	0.742485	588422	436895	440657	736188	427759	446031
Q9NX46	ADPRS	ADP-ribosylhydrolase ARH3	0.027933	0.767107	0.285151	-0.3825	0.5449	0	0.756059	901358	681480	747835	1.05488e+06	633744	729216
Q92567	FAM168A	Protein FAM168A	0.0335196	0.767586	0.479819	-0.3816	0.3189	0	0.751042	947279	711447	703913	1.19065e+06	824059	598834
Q9H936	SLC25A22	Mitochondrial glutamate carrier 1	0.00977654	0.768438	0.292298	-0.38	0.5342	0	0.780741	3.0302e+06	2.3658e+06	2.9128e+06	3.1476e+06	1943205	2.7884e+06
Q9Y624	F11R	Junctional adhesion molecule A	0	0.769397	0.143657	-0.3782	0.8427	0	0.771162	400045	308500	371583	428508	335315	281685
O75822	EIF3J	Eukaryotic translation initiation factor 3 subunit J	0.0740223	0.770571	0.127434	-0.376	0.8947	0	0.765187	1.27251e+07	9.73706e+06	1.14257e+07	1.40245e+07	9.83072e+06	9.6434e+06
Q969E2	SCAMP4	Secretory carrier-associated membrane protein 4	0.0027933	0.770625	0.439198	-0.3759	0.3573	0	0.78083	2.06729e+06	1.6142e+06	2.39036e+06	1.74421e+06	1.26392e+06	1.96448e+06
Q969Y2	GTPBP3	tRNA modification GTPase GTPBP3, mitochondrial	0.0223464	0.770785	0.424234	-0.3756	0.3724	0	0.796977	677628	540054	655627	699629	402784	677324
Q5JSH3	WDR44	WD repeat-containing protein 44	0.0963687	0.771052	0.36647	-0.3751	0.436	0	0.788977	6.8216e+06	5.38209e+06	6.5824e+06	7.06081e+06	4.20807e+06	6.5561e+06
Q96A35	MRPL24	39S ribosomal protein L24, mitochondrial	0.0586592	0.771801	0.673571	-0.3737	0.1716	0	0.870789	7.2858e+06	6.3444e+06	6.41723e+06	8.15438e+06	3.32729e+06	9.3615e+06
Q13472	TOP3A	DNA topoisomerase 3-alpha	0.00698324	0.771854	0.116419	-0.3736	0.934	0	0.768646	1.01823e+06	782655	932128	1.10432e+06	743335	821975
Q9H329	EPB41L4B	Band 4.1-like protein 4B	0.0027933	0.772068	0.136177	-0.3732	0.8659	0	0.768638	316118	242980	346991	285245	252869	233092
Q15418	RPS6KA1	Ribosomal protein S6 kinase alpha-1	0.0265363	0.772978	0.735515	-0.3715	0.1334	0	0.785068	1.40591e+06	1.10374e+06	2.00228e+06	809545	604965	1.60251e+06
Q9UBQ0	VPS29	Vacuolar protein sorting-associated protein 29	0.0432961	0.773193	0.575924	-0.3711	0.2396	0	0.801274	2.07968e+07	1.6664e+07	2.49216e+07	16672011	1.13379e+07	2.199e+07
P14209	CD99	CD99 antigen	0.0349162	0.7733	0.0233213	-0.3709	1.632	0	0.772861	4.20238e+06	3.24785e+06	4.35612e+06	4.04864e+06	3.29532e+06	3.20039e+06
Q9BXJ9	NAA15	N-alpha-acetyltransferase 15, NatA auxiliary subunit	0.0949721	0.773675	0.645912	-0.3702	0.1898	0	0.812166	5.27346e+07	4.28292e+07	6.58231e+07	3.96461e+07	2.63176e+07	5.93408e+07
O94874	UFL1	E3 UFM1-protein ligase 1	0.0740223	0.773836	0.634951	-0.3699	0.1973	0	0.84765	9.73098e+06	8.24846e+06	1.08341e+07	8.62784e+06	4.7696e+06	1.17273e+07
O15270	SPTLC2	Serine palmitoyltransferase 2	0.00418994	0.773997	0.697655	-0.3696	0.1564	0	0.871256	1.45857e+06	1.27079e+06	1.74531e+06	1.17182e+06	648639	1.89293e+06
Q9BVK8	TMEM147	BOS complex subunit TMEM147	0	0.774158	0.415165	-0.3693	0.3818	0	0.796177	325156	258882	346496	303817	197316	320448
P51580	TPMT	Thiopurine S-methyltransferase	0	0.774212	0.154996	-0.3692	0.8097	0	0.777797	1.05682e+06	821992	1.04369e+06	1069947	915087	728897
P61165	TMEM258	Transmembrane protein 258	0.00558659	0.774212	0.112245	-0.3692	0.9498	0	0.776709	606651	471191	597332	615970	427647	514735
Q15125	EBP	3-beta-hydroxysteroid-Delta(8),Delta(7)-isomerase	0.0656425	0.774641	0.0634117	-0.3684	1.198	0	0.773147	9.19507e+06	7.10914e+06	9.78191e+06	8608234	7.2678e+06	6.95047e+06
P53597	SUCLG1	Succinate--CoA ligase [ADP/GDP-forming] subunit alpha, mitochondrial	0.0628492	0.775393	0.381141	-0.367	0.4189	0	0.795303	1.73702e+07	1.38146e+07	1.6352e+07	1.83884e+07	1.07877e+07	1.68415e+07
Q9NRP0	OSTC	Oligosaccharyltransferase complex subunitTC	0.00977654	0.775447	0.294896	-0.3669	0.5303	0	0.787689	1835749	1.446e+06	1.89464e+06	1.77685e+06	1.18837e+06	1.70363e+06
Q9UJX3	ANAPC7	Anaphase-promoting complex subunit 7	0.0558659	0.77577	0.576083	-0.3663	0.2395	0	0.809434	3.75958e+06	3.04313e+06	4402238	3.11693e+06	2.04008e+06	4.04618e+06
Q8WVS4	DYNC2I1	Cytoplasmic dynein 2 intermediate chain 1	0.00418994	0.775877	0.200012	-0.3661	0.6989	0	0.779252	2.88328e+06	2.2468e+06	3.11102e+06	2.65553e+06	1.99942e+06	2.49418e+06
Q13426	XRCC4	DNA repair protein XRCC4	0.0167598	0.776254	0.218327	-0.3654	0.6609	0	0.768877	353543	271831	401846	305241	281753	261910
Q5BJF2	TMEM97	Sigma intracellular receptor 2	0.0502793	0.776254	0.351411	-0.3654	0.4542	0	0.783108	3.47326e+06	2.71993e+06	3.87624e+06	3.07027e+06	2.24773e+06	3.19213e+06
P17028	ZNF24	Zinc finger protein 24	0.0307263	0.776684	0.226215	-0.3646	0.6455	0	0.783836	5.22605e+06	4.09637e+06	5.11715e+06	5.33495e+06	3.50584e+06	4.68689e+06
Q8WVC0	LEO1	RNA polymerase-associated protein LEO1	0.0796089	0.7769	0.363951	-0.3642	0.439	0	0.765253	1.53768e+06	1.17671e+06	1.84521e+06	1.23015e+06	1.09224e+06	1.26119e+06
P27144	AK4	Adenylate kinase 4, mitochondrial	0.0377095	0.776953	0.539606	-0.3641	0.2679	0	0.822392	7.8775e+06	6.47839e+06	8.0825e+06	7.67249e+06	4.3357e+06	8.62108e+06
Q9H0C8	ILKAP	Integrin-linked kinase-associated serine/threonine phosphatase 2C	0.0446927	0.776953	0.076525	-0.3641	1.116	0	0.77601	4.6434e+06	3.60332e+06	4.31058e+06	4.97621e+06	3.66466e+06	3.54198e+06
Q7Z3C6	ATG9A	Autophagy-related protein 9A	0.00139665	0.777115	0.695785	-0.3638	0.1575	0	0.890573	975498	868752	1.08385e+06	867151	435456	1.30205e+06
Q86YT6	MIB1	E3 ubiquitin-protein ligase MIB1	0.0209497	0.777277	0.524452	-0.3635	0.2803	0	0.81864	6.18233e+06	5.0611e+06	6.41042e+06	5.95423e+06	6.66107e+06	3.46113e+06
Q9Y221	NIP7	60S ribosome subunit biogenesis protein NIP7 homolog	0.047486	0.778517	0.298818	-0.3612	0.5246	0	0.768057	3.12431e+06	2.39964e+06	2.58679e+06	3.66183e+06	2.52227e+06	2277023
Q15042	RAB3GAP1	Rab3 GTPase-activating protein catalytic subunit	0.0405028	0.778571	0.563549	-0.3611	0.2491	0	0.821949	1.65998e+06	1.36442e+06	1.83716e+06	1.48279e+06	907255	1.82158e+06
Q8NCM8	DYNC2H1	Cytoplasmic dynein 2 heavy chain 1	0.0153631	0.778733	0.763907	-0.3608	0.117	0	0.925883	3.5554e+06	3.29188e+06	4.51664e+06	2.59416e+06	1.35968e+06	5.22409e+06
Q9UER7	DAXX	Death domain-associated protein 6	0.0181564	0.779651	0.160896	-0.3591	0.7935	0	0.780867	1.0674e+06	833494	1.12331e+06	1.01148e+06	748593	918394
O95166	GABARAP	Gamma-aminobutyric acid receptor-associated protein	0.0027933	0.779867	0.0453442	-0.3587	1.343	0	0.778987	836203	651391	880505	791901	642917	659866
Q69YQ0	SPECC1L	Cytospin-A	0.0391061	0.779975	0.541744	-0.3585	0.2662	0	0.81248	1.98012e+08	1.60881e+08	2.25104e+08	170919989	2.09398e+08	1.12364e+08
Q9Y5J7	TIMM9	Mitochondrial import inner membrane translocase subunit Tim9	0.0125698	0.780624	0.49297	-0.3573	0.3072	0	0.76265	2.19723e+06	1.67572e+06	2.74292e+06	1.65154e+06	1.93605e+06	1.41539e+06
Q9UNN5	FAF1	FAS-associated factor 1	0.0181564	0.781382	0.408086	-0.3559	0.3892	0	0.77707	5.10261e+06	3.96508e+06	6.03929e+06	4.16593e+06	3.37656e+06	4.55361e+06
P61960	UFM1	Ubiquitin-fold modifier 1	0.0251397	0.781545	0.299163	-0.3556	0.5241	0	0.785375	8743461	6.8669e+06	7.87302e+06	9.6139e+06	7.86613e+06	5.86766e+06
P61086	UBE2K	Ubiquitin-conjugating enzyme E2 K	0.0432961	0.781545	0.268754	-0.3556	0.5706	0	0.775996	8.54369e+06	6.62988e+06	7.3303e+06	9.75709e+06	7.13967e+06	6.12008e+06
P55809	OXCT1	Succinyl-CoA:3-ketoacid coenzyme A transferase 1, mitochondrial	0.0935754	0.781761	0.133967	-0.3552	0.873	0	0.777768	8.45707e+06	6.57764e+06	7.63424e+06	9.27991e+06	6.72679e+06	6.4285e+06
P14735	IDE	Insulin-degrading enzyme	0.0614525	0.781815	0.242817	-0.3551	0.6147	0	0.773273	1.185e+07	9.16327e+06	1.36136e+07	1.00864e+07	8977799	9.34873e+06
P13807	GYS1	Glycogen [starch] synthase, muscle	0.099162	0.782303	0.703546	-0.3542	0.1527	0	0.834087	9.1054e+06	7.5947e+06	1.17803e+07	6.43047e+06	4.25866e+06	1.09307e+07
Q8N766	EMC1	ER membrane protein complex subunit 1	0.0349162	0.78252	0.359924	-0.3538	0.4438	0	0.799603	4.43775e+06	3.54844e+06	4.51379e+06	4.36172e+06	2.8227e+06	4.27418e+06
O94760	DDAH1	N(G),N(G)-dimethylarginine dimethylaminohydrolase 1	0.0391061	0.783063	0.268822	-0.3528	0.5705	0	0.780724	3211442	2.50725e+06	2.80753e+06	3.61535e+06	2.25597e+06	2.75853e+06
P00167	CYB5A	Cytochrome b5	0.00698324	0.783389	0.190014	-0.3522	0.7212	0	0.789354	1.15149e+06	908936	1.08672e+06	1.21626e+06	1.00958e+06	808289
Q96CN7	ISOC1	Isochorismatase domain-containing protein 1	0.0558659	0.783389	0.590384	-0.3522	0.2289	0	0.787491	5.473e+06	4.30994e+06	4.07005e+06	6.87595e+06	5.48501e+06	3.13488e+06
Q8NB37	GATD1	Glutamine amidotransferase-like class 1 domain-containing protein 1	0.0027933	0.783497	0.20676	-0.352	0.6845	0	0.784515	628863	493353	574770	682957	444094	542612
P63000	RAC1	Ras-related C3 botulinum toxin substrate 1	0.0810056	0.783606	0.278224	-0.3518	0.5556	0	0.77879	4.74137e+06	3.69253e+06	4069411	5.41332e+06	4.00176e+06	3.38329e+06
Q9GZZ9	UBA5	Ubiquitin-like modifier-activating enzyme 5	0.00558659	0.78366	0.584095	-0.3517	0.2335	0	0.834242	6.64166e+06	5.54075e+06	6.09205e+06	7.19127e+06	3.58978e+06	7.49172e+06
Q8NCW5	NAXE	NAD(P)H-hydrate epimerase	0.0600559	0.783932	0.336619	-0.3512	0.4729	0	0.775906	7.29504e+06	5.66027e+06	6.06271e+06	8.52738e+06	5.14321e+06	6.17733e+06
Q96ME1	FBXL18	F-box/LRR-repeat protein 18	0.00139665	0.783986	0.811226	-0.3511	0.09086	0	0.716224	517950	370969	833444	202457	186113	555824
Q7Z2W9	MRPL21	39S ribosomal protein L21, mitochondrial	0.0628492	0.784856	0.504153	-0.3495	0.2974	0	0.803613	8.34761e+06	6.70824e+06	7.16467e+06	9.53055e+06	4.97792e+06	8.43857e+06
O00560	SDCBP	Syntenin-1	0.0768156	0.78491	0.139238	-0.3494	0.8562	0	0.786438	3.42559e+06	2.69402e+06	3.25168e+06	3.59951e+06	2.46224e+06	2.9258e+06
O75935	DCTN3	Dynactin subunit 3	0.0530726	0.785019	0.488616	-0.3492	0.311	0	0.816771	4.92333e+06	4.02123e+06	4.78335e+06	5.06331e+06	5.14223e+06	2900241
P07858	CTSB	Cathepsin B	0.0656425	0.785455	0.261743	-0.3484	0.5821	0	0.78722	519027	408588	466669	571385	359901	457275
P46063	RECQL	ATP-dependent DNA helicase Q1	0.0963687	0.785618	0.644226	-0.3481	0.191	0	0.745368	8.473e+06	6.3155e+06	1.16332e+07	5.3128e+06	4.95259e+06	7.67842e+06
Q04323	UBXN1	UBX domain-containing protein 1	0.0879888	0.785727	0.29121	-0.3479	0.5358	0	0.773829	3.3075e+06	2.55944e+06	2.75222e+06	3862778	2.57989e+06	2.53899e+06
Q96MX6	DNAAF10	Dynein axonemal assembly factor 10	0.00977654	0.786054	0.454124	-0.3473	0.3428	0	0.809746	1.14993e+06	931155	1.06518e+06	1.23469e+06	700873	1.16144e+06
P04179	SOD2	Superoxide dismutase [Mn], mitochondrial	0.0363128	0.786272	0.387092	-0.3469	0.4122	0	0.800727	1.20221e+07	9.62641e+06	1.12022e+07	1.2842e+07	1.1612e+07	7.64081e+06
Q9NPQ8	RIC8A	Synembryn-A	0.023743	0.786326	0.515906	-0.3468	0.2874	0	0.812746	5.52855e+06	4.49331e+06	6.1709e+06	4.8862e+06	3.25125e+06	5.73536e+06
O96007	MOCS2	Molybdopterin synthase catalytic subunit	0.0530726	0.786381	0.164692	-0.3467	0.7833	0	0.782725	651362	509837	583825	718900	488878	530796
Q9UJW0	DCTN4	Dynactin subunit 4	0.0614525	0.787363	0.650787	-0.3449	0.1866	0	0.759442	5.91995e+06	4.49586e+06	8.04009e+06	3.79982e+06	3.37128e+06	5.62045e+06
Q7L5Y9	MAEA	E3 ubiquitin-protein transferase MAEA	0.0125698	0.787472	0.550055	-0.3447	0.2596	0	0.799184	1.05929e+06	846570	1.27845e+06	840137	628810	1.06433e+06
Q9BTX1	NDC1	Nucleoporin NDC1	0.0251397	0.787472	0.701463	-0.3447	0.154	0	0.873689	1.53172e+06	1.33825e+06	1.82009e+06	1.24335e+06	714485	1.96201e+06
Q9NT62	ATG3	Ubiquitin-like-conjugating enzyme ATG3	0.027933	0.787581	0.235151	-0.3445	0.6287	0	0.779372	1.7351e+07	1.35229e+07	1.97078e+07	1.49943e+07	1.29521e+07	1.40937e+07
Q9H9A7	RMI1	RecQ-mediated genome instability protein 1	0.00139665	0.787635	0.96848	-0.3444	0.01391	0	0.620067	245200	152041	100	245200	152041	100
Q9NX07	TRNAU1AP	tRNA selenocysteine 1-associated protein 1	0.0195531	0.787745	0.196563	-0.3442	0.7065	0	0.795929	1.62516e+06	1.29352e+06	1.61367e+06	1636663	1.13211e+06	1.45492e+06
Q8TBQ9	TMEM167A	Protein kish-A	0	0.787963	0.0815181	-0.3438	1.089	0	0.789786	1.01359e+06	800516	1.03015e+06	997018	744232	856801
Q9NTZ6	RBM12	RNA-binding protein 12	0.0488827	0.788018	0.410837	-0.3437	0.3863	0	0.774615	2.12572e+07	1.64662e+07	16860998	2.56534e+07	1.48645e+07	1.80678e+07
Q5ST30	VARS2	Valine--tRNA ligase, mitochondrial	0.00698324	0.788127	0.45373	-0.3435	0.3432	0	0.812769	1.27785e+06	1.03859e+06	1.1869e+06	1.36879e+06	785099	1.29209e+06
Q8TCC3	MRPL30	39S ribosomal protein L30, mitochondrial	0.0307263	0.7884	0.611946	-0.343	0.2133	0	0.830994	4.55362e+06	3.78403e+06	3.831e+06	5.27624e+06	2.46106e+06	5.107e+06
Q5JPH6	EARS2	Probable glutamate--tRNA ligase, mitochondrial	0.0153631	0.789713	0.43998	-0.3406	0.3566	0	0.813681	3.45083e+06	2.80787e+06	3.62572e+06	3.27594e+06	2.14322e+06	3.47253e+06
Q5T750	XP32	Skin-specific protein 32	0.075419	0.789877	0.542725	-0.3403	0.2654	0	0.800345	1.32053e+06	1.05688e+06	1.57468e+06	1.06637e+06	787516	1326237
O75592	MYCBP2	E3 ubiquitin-protein ligase MYCBP2	0.0251397	0.790041	0.343493	-0.34	0.4641	0	0.776605	1.70486e+07	13240028	1.39331e+07	2.01641e+07	1.26884e+07	1.37916e+07
Q13363	CTBP1	C-terminal-binding protein 1	0.047486	0.790918	0.603208	-0.3384	0.2195	0	0.851959	9.38989e+06	7.9998e+06	9.41628e+06	9.3635e+06	5.0635e+06	1.09361e+07
Q96A26	FAM162A	Protein FAM162A	0.0209497	0.790973	0.218944	-0.3383	0.6597	0	0.783989	5.82502e+06	4.56675e+06	6575369	5.07467e+06	4.67724e+06	4.45626e+06
O43759	SYNGR1	Synaptogyrin-1	0.0027933	0.791192	0.118565	-0.3379	0.926	0	0.790706	1.54787e+06	1.22391e+06	1.65703e+06	1.43871e+06	1.29195e+06	1.15587e+06
Q15642	TRIP10	Cdc42-interacting protein 4	0	0.791247	0.475723	-0.3378	0.3226	0	0.766654	1.962e+06	1.50418e+06	2.46513e+06	1.45888e+06	1.42017e+06	1.58818e+06
P11233	RALA	Ras-related protein Ral-A	0.0321229	0.791247	0.192867	-0.3378	0.7147	0	0.786131	8.48768e+06	6.67243e+06	7.49917e+06	9.4762e+06	6.8788e+06	6.46606e+06
Q9HB21	PLEKHA1	Pleckstrin homology domain-containing family A member 1	0.0446927	0.791302	0.255503	-0.3377	0.5926	0	0.796388	1.85739e+06	1.4792e+06	2.00491e+06	1.70988e+06	1663613	1.2948e+06
Q9BW72	HIGD2A	HIG1 domain family member 2A, mitochondrial	0.0139665	0.791796	0.142771	-0.3368	0.8454	0	0.791895	2.16773e+06	1.71661e+06	2.31469e+06	2.02076e+06	1.59273e+06	1.84049e+06
O00743	PPP6C	Serine/threonine-protein phosphatase 6 catalytic subunit	0.051676	0.792015	0.253559	-0.3364	0.5959	0	0.793154	6.76873e+06	5.36865e+06	6.14486e+06	7.3926e+06	4.761e+06	5.97629e+06
O75832	PSMD10	26S proteasome non-ATPase regulatory subunit 10	0.0530726	0.79207	0.543919	-0.3363	0.2645	0	0.823678	1.95704e+06	1.61197e+06	2.16632e+06	1.74776e+06	1.13761e+06	2.08634e+06
Q96HR8	NAF1	H/ACA ribonucleoprotein complex non-core subunit NAF1	0.0684358	0.792125	0.209684	-0.3362	0.6784	0	0.796969	1.79803e+06	1.43298e+06	1.66894e+06	1.92712e+06	1.28443e+06	1.58152e+06
Q9P0M9	MRPL27	39S ribosomal protein L27, mitochondrial	0.0572626	0.7924	0.65273	-0.3357	0.1853	0	0.850101	4.76209e+06	4.04825e+06	4012031	5512146	2.45608e+06	5.64043e+06
Q14168	MPP2	MAGUK p55 subfamily member 2	0.0195531	0.792674	0.0290348	-0.3352	1.537	0	0.79236	278767	220883	267519	290014	222828	218938
Q9Y291	MRPS33	28S ribosomal protein S33, mitochondrial	0.0446927	0.792729	0.695175	-0.3351	0.1579	0	0.872332	2.56895e+06	2.24098e+06	2.11269e+06	3.02522e+06	1.24374e+06	3238223
O75414	NME6	Nucleoside diphosphate kinase 6	0.0111732	0.792949	0.319408	-0.3347	0.4957	0	0.793675	511750	406164	573295	450206	354379	457948
O60739	EIF1B	Eukaryotic translation initiation factor 1b	0.0810056	0.793554	0.132163	-0.3336	0.8789	0	0.7913	405567	320925	372148	438986	335231	306620
Q9H9P8	L2HGDH	L-2-hydroxyglutarate dehydrogenase, mitochondrial	0.00977654	0.793719	0.475824	-0.3333	0.3226	0	0.817885	2.52766e+06	2.06734e+06	2.70012e+06	2.35521e+06	1.54689e+06	2.58779e+06
Q99570	PIK3R4	Phosphoinositide 3-kinase regulatory subunit 4	0.0125698	0.793884	0.811363	-0.333	0.09079	0	1.02653	727910	747225	538267	917554	249018	1.24543e+06
Q14108	SCARB2	Lysosome membrane protein 2	0.0027933	0.794655	0.29004	-0.3316	0.5375	0	0.804849	482141	388051	480413	483868	450074	326027
Q9NTI5	PDS5B	Sister chromatid cohesion protein PDS5 homolog B	0.0907821	0.794875	0.612555	-0.3312	0.2129	0	0.852638	6.57465e+06	5.6058e+06	6.22055e+06	6.92876e+06	3.55771e+06	7.65389e+06
P82675	MRPS5	28S ribosomal protein S5, mitochondrial	0.0921788	0.795261	0.667517	-0.3305	0.1755	0	0.878399	7.92927e+06	6.96506e+06	8.35245e+06	7.50608e+06	3.98999e+06	9.94013e+06
P30536	TSPO	Translocator protein	0.00558659	0.795592	0.19502	-0.3299	0.7099	0	0.800454	5.92862e+06	4.74559e+06	6.1467e+06	5.71055e+06	4.21099e+06	5.28018e+06
Q86YS7	C2CD5	C2 domain-containing protein 5	0.00698324	0.795867	0.397878	-0.3294	0.4003	0	0.804631	299151	240706	269031	329271	195811	285602
Q9HD42	CHMP1A	Charged multivesicular body protein 1a	0.0405028	0.79653	0.449913	-0.3282	0.3469	0	0.808425	2.69245e+06	2.17665e+06	2.34969e+06	3.03521e+06	2.61835e+06	1.73494e+06
Q96CS4	ZNF689	Zinc finger protein 689	0	0.797137	0.519953	-0.3271	0.284	0	0.792257	268978	213100	210258	327698	173154	253045
Q14165	MLEC	Malectin	0.00977654	0.797303	0.0620504	-0.3268	1.207	0	0.798437	6.16207e+06	4.92003e+06	6.1937e+06	6.13044e+06	4.63322e+06	5.20683e+06
Q13017	ARHGAP5	Rho GTPase-activating protein 5	0.0335196	0.797469	0.429007	-0.3265	0.3675	0	0.788518	260198	205170	310223	210173	180050	230291
P48735	IDH2	Isocitrate dehydrogenase [NADP], mitochondrial	0.0907821	0.797524	0.526506	-0.3264	0.2786	0	0.834701	1.28518e+07	1.07274e+07	12821172	1.28825e+07	7.60893e+06	1.38459e+07
Q9NX14	NDUFB11	NADH dehydrogenase [ubiquinone] 1 beta subcomplex subunit 11, mitochondrial	0.0377095	0.797579	0.265825	-0.3263	0.5754	0	0.79176	1.01716e+06	805344	1.15097e+06	883340	751661	859027
Q9NPD8	UBE2T	Ubiquitin-conjugating enzyme E2 T	0.0027933	0.797745	0.18943	-0.326	0.7226	0	0.796487	3.30239e+06	2.63031e+06	3.61778e+06	2.98699e+06	2.79918e+06	2.46144e+06
Q9Y6I3	EPN1	Epsin-1	0.00418994	0.797856	0.0661462	-0.3258	1.179	0	0.799977	2.58294e+06	2.0663e+06	2.51582e+06	2.65006e+06	1.94838e+06	2.18421e+06
Q9UHW5	GPN3	GPN-loop GTPase 3	0.00698324	0.798298	0.779491	-0.325	0.1082	0	1.00172	698294	699492	752027	644562	275838	1.12315e+06
P62330	ARF6	ADP-ribosylation factor 6	0.0377095	0.79852	0.522283	-0.3246	0.2821	0	0.830902	5.15509e+06	4.28337e+06	4.91971e+06	5.39047e+06	3.08036e+06	5.48639e+06
Q9UET6	FTSJ1	Putative tRNA (cytidine(32)/guanosine(34)-2'-O)-methyltransferase	0.00139665	0.79863	0.419408	-0.3244	0.3774	0	0.781416	1.10055e+06	859985	864396	1.3367e+06	893701	826269
Q14728	MFSD10	Major facilitator superfamily domain-containing protein 10	0.00418994	0.798741	0.578098	-0.3242	0.238	0	0.817119	183353	149822	217298	149409	108416	191227
Q9NVU7	SDAD1	Protein SDA1 homolog	0.0684358	0.798741	0.520871	-0.3242	0.2833	0	0.826863	4.07897e+06	3.37275e+06	4.3831e+06	3.77484e+06	2.44764e+06	4297864
P23378	GLDC	Glycine dehydrogenase (decarboxylating), mitochondrial	0.0027933	0.798963	0.763048	-0.3238	0.1174	0	0.970067	1.67369e+06	1.62359e+06	1.78948e+06	1.5579e+06	699016	2.54816e+06
P49257	LMAN1	Protein ERGIC-53	0.0432961	0.799073	0.481696	-0.3236	0.3172	0	0.774473	1.067e+07	8.26363e+06	1.33306e+07	8.00946e+06	7.73158e+06	8.79568e+06
Q96SU4	OSBPL9	Oxysterol-binding protein-related protein 9	0.0418994	0.79935	0.596068	-0.3231	0.2247	0	0.827545	1069494	885054	1.24337e+06	895614	612277	1.15783e+06
O95456	PSMG1	Proteasome assembly chaperone 1	0.0879888	0.799517	0.0548489	-0.3228	1.261	0	0.800275	4.48e+06	3.58523e+06	4.36953e+06	4.59046e+06	3.76192e+06	3.40854e+06
O43617	TRAPPC3	Trafficking protein particle complex subunit 3	0.023743	0.800016	0.124138	-0.3219	0.9061	0	0.798107	1.04888e+07	8.37115e+06	1.13812e+07	9.59637e+06	8.48438e+06	8.25792e+06
Q9UBW8	COPS7A	COP9 signalosome complex subunit 7a	0.0614525	0.800237	0.504417	-0.3215	0.2972	0	0.802986	2.22409e+06	1.78591e+06	2.63826e+06	1.80993e+06	1.43403e+06	2.1378e+06
Q96EK4	THAP11	THAP domain-containing protein 11	0.0027933	0.80057	0.281141	-0.3209	0.5511	0	0.800996	1.4437e+06	1.1564e+06	1.28026e+06	1.60714e+06	1.0446e+06	1.2682e+06
Q8TC12	RDH11	Retinol dehydrogenase 11	0.0391061	0.80057	0.530669	-0.3209	0.2752	0	0.806817	3.32554e+06	2.6831e+06	3.94252e+06	2.70856e+06	2077020	3.28919e+06
Q5VSL9	STRIP1	Striatin-interacting protein 1	0.00558659	0.800681	0.657721	-0.3207	0.182	0	0.856178	1.82842e+06	1.56545e+06	2.11595e+06	1.54089e+06	969172	2.16174e+06
O60784	TOM1	Target of Myb1 membrane trafficking protein	0.0405028	0.801292	0.0859477	-0.3196	1.066	0	0.799754	4.83496e+06	3.86678e+06	5.17169e+06	4.49824e+06	3.88146e+06	3.8521e+06
Q9Y5K8	ATP6V1D	V-type proton ATPase subunit D	0.00837989	0.801625	0.694672	-0.319	0.1582	0	0.859549	1.8799e+06	1.61587e+06	2.27671e+06	1.4831e+06	951134	2.2806e+06
Q6N069	NAA16	N-alpha-acetyltransferase 16, NatA auxiliary subunit	0.0418994	0.801625	0.733193	-0.319	0.1348	0	0.845974	959186	811447	1259246	659126	460113	1.16278e+06
Q8NEM7	SUPT20H	Transcription factor SPT20 homolog	0.0335196	0.801848	0.243664	-0.3186	0.6132	0	0.809708	222209	179924	218715	225704	156171	203678
Q9NR31	SAR1A	GTP-binding protein SAR1a	0.0879888	0.801959	0.132477	-0.3184	0.8779	0	0.799699	4.99254e+06	3.99253e+06	5439729	4.54535e+06	3.97442e+06	4.01064e+06
Q9UBL3	ASH2L	Set1/Ash2 histone methyltransferase complex subunit ASH2	0.0600559	0.802126	0.536003	-0.3181	0.2708	0	0.799104	615367	491742	482889	747844	393688	589795
O75351	VPS4B	Vacuolar protein sorting-associated protein 4B	0.0377095	0.803071	0.458096	-0.3164	0.339	0	0.825605	397501	328179	398732	396270	250715	405642
Q9UNL2	SSR3	Translocon-associated protein subunit gamma	0.0614525	0.803405	0.397324	-0.3158	0.4009	0	0.817589	5.16903e+06	4.22614e+06	5.48581e+06	4852242	3.4148e+06	5.03748e+06
O95219	SNX4	Sorting nexin-4	0.0628492	0.803851	0.282096	-0.315	0.5496	0	0.812076	832404	675975	859993	804814	577507	774444
Q8IYS1	PM20D2	Xaa-Arg dipeptidase	0.0502793	0.80491	0.0773767	-0.3131	1.111	0	0.805142	1.9458e+06	1.56665e+06	1.8497e+06	2.0419e+06	1.63229e+06	1.501e+06
Q9BUB7	TMEM70	Transmembrane protein 70, mitochondrial	0.00418994	0.805134	0.628102	-0.3127	0.202	0	0.838889	4.69787e+06	3.94099e+06	5.51477e+06	3.88097e+06	2.65022e+06	5.23177e+06
Q53H82	LACTB2	Endoribonuclease LACTB2	0.0027933	0.805245	0.127952	-0.3125	0.893	0	0.80449	4.34174e+06	3.49289e+06	4.08474e+06	4.59873e+06	3.70807e+06	3.2777e+06
Q6YP21	KYAT3	Kynurenine--oxoglutarate transaminase 3	0.0111732	0.805301	0.546966	-0.3124	0.262	0	0.829967	5.96273e+06	4.94887e+06	6.68921e+06	5.23626e+06	3.61676e+06	6.28099e+06
Q2M296	MTHFSD	Methenyltetrahydrofolate synthase domain-containing protein	0	0.805859	0.213745	-0.3114	0.6701	0	0.799735	1.75404e+06	1.40277e+06	1.95831e+06	1.54977e+06	1.36594e+06	1.4396e+06
O43633	CHMP2A	Charged multivesicular body protein 2a	0.00418994	0.805915	0.607946	-0.3113	0.2161	0	0.790485	386170	305261	277166	495173	368312	242210
P07992	ERCC1	DNA excision repair protein ERCC-1	0.0195531	0.806139	0.126719	-0.3109	0.8972	0	0.806756	487727	393476	511124	464330	365658	421295
Q96RR1	TWNK	Twinkle mtDNA helicase	0.0153631	0.806195	0.167308	-0.3108	0.7765	0	0.805672	340334	274198	364868	315799	293851	254544
Q8IVS2	MCAT	Malonyl-CoA-acyl carrier protein transacylase, mitochondrial	0.0027933	0.806306	0.439376	-0.3106	0.3572	0	0.824798	5.49629e+06	4.53333e+06	5.26366e+06	5.72893e+06	3.54805e+06	5.51861e+06
Q9BTE7	DCUN1D5	DCN1-like protein 5	0.0153631	0.806306	0.375158	-0.3106	0.4258	0	0.82099	9.23891e+06	7.58506e+06	9.29855e+06	9.17927e+06	6.15714e+06	9.01297e+06
O60518	RANBP6	Ran-binding protein 6	0.075419	0.806418	0.973088	-0.3104	0.01185	0	0.650151	365543	237658	100	365543	100	237658
P55327	TPD52	Tumor protein D52	0.0824022	0.806865	0.273259	-0.3096	0.5634	0	0.814338	3.94438e+06	3.21206e+06	3.88044e+06	4.00832e+06	3.66573e+06	2.75839e+06
Q9H8H2	DDX31	Probable ATP-dependent RNA helicase DDX31	0.0558659	0.806921	0.578562	-0.3095	0.2377	0	0.846593	4.85446e+06	4.10975e+06	4.53051e+06	5.17842e+06	2.84216e+06	5.37735e+06
Q9BSL1	UBAC1	Ubiquitin-associated domain-containing protein 1	0.00698324	0.807201	0.972377	-0.309	0.01217	0	0.6529	286692	187181	100	286692	100	187181
Q8TEW0	PARD3	Partitioning defective 3 homolog	0.0642458	0.807201	0.390786	-0.309	0.4081	0	0.814524	689786	561847	619682	759889	656097	467597
Q66K74	MAP1S	Microtubule-associated protein 1S	0.0460894	0.807649	0.570454	-0.3082	0.2438	0	0.847956	5.62729e+06	4.77169e+06	5.7898e+06	5464776	3.31449e+06	6.2289e+06
P43250	GRK6	G protein-coupled receptor kinase 6	0	0.807705	0.668496	-0.3081	0.1749	0	0.878558	587404	516069	632738	542070	310042	722096
Q9NZL9	MAT2B	Methionine adenosyltransferase 2 subunit beta	0.0628492	0.808097	0.665787	-0.3074	0.1767	0	0.854563	1.06655e+07	9.11435e+06	1.25152e+07	8.81582e+06	5757788	1.24709e+07
Q8NC60	NOA1	Nitric oxide-associated protein 1	0.00418994	0.808209	0.707528	-0.3072	0.1503	0	0.907725	548661	498033	557176	540145	271403	724662
Q99536	VAT1	Synaptic vesicle membrane protein VAT-1 homolog	0.0893855	0.808657	0.114705	-0.3064	0.9404	0	0.808736	4.18687e+06	3.38608e+06	3.96407e+06	4.40968e+06	3.57899e+06	3.19317e+06
Q15527	SURF2	Surfeit locus protein 2	0	0.80933	0.573872	-0.3052	0.2412	0	0.84987	1.56542e+06	1.3304e+06	1.56293e+06	1.56792e+06	922149	1.73866e+06
P41214	EIF2D	Eukaryotic translation initiation factor 2D	0.0139665	0.809667	0.638401	-0.3046	0.1949	0	0.854244	1.93321e+06	1.65144e+06	2.19371e+06	1.67272e+06	1.08334e+06	2.21954e+06
Q13144	EIF2B5	Translation initiation factor eIF-2B subunit epsilon	0.0405028	0.810003	0.545064	-0.304	0.2636	0	0.839628	4.05044e+06	3.40086e+06	4.36741e+06	3.73347e+06	2.46951e+06	4.33221e+06
P55145	MANF	Mesencephalic astrocyte-derived neurotrophic factor	0.0446927	0.81006	0.410938	-0.3039	0.3862	0	0.809297	2.47084e+06	1.99965e+06	2.09608e+06	2.84561e+06	2.26871e+06	1.73058e+06
O14686	KMT2D	Histone-lysine N-methyltransferase 2D	0.0572626	0.810116	0.710994	-0.3038	0.1481	0	0.908994	178546	162297	187108	169983	88412	236182
Q92882	OSTF1	Osteoclast-stimulating factor 1	0.00139665	0.810172	0.247759	-0.3037	0.606	0	0.81467	1.35725e+06	1.10571e+06	1.37328e+06	1.34122e+06	1.24761e+06	963813
Q96GC5	MRPL48	39S ribosomal protein L48, mitochondrial	0.0642458	0.810172	0.534557	-0.3037	0.272	0	0.835801	7.30576e+06	6.10617e+06	7.97826e+06	6.63327e+06	4.51441e+06	7.69793e+06
Q9Y6B6	SAR1B	GTP-binding protein SAR1b	0.0698324	0.810284	0.178493	-0.3035	0.7484	0	0.808388	2.94461e+06	2380385	3.16697e+06	2.72225e+06	2.21531e+06	2.54546e+06
Q13405	MRPL49	39S ribosomal protein L49, mitochondrial	0.0726257	0.81079	0.598295	-0.3026	0.2231	0	0.79127	8.10146e+06	6.41045e+06	5.82961e+06	1.03733e+07	5.30225e+06	7.51864e+06
Q9NWX6	THG1L	Probable tRNA(His) guanylyltransferase	0.0027933	0.810846	0.97461	-0.3025	0.01117	0	0.657392	473199	311077	100	473199	311077	100
Q15392	DHCR24	Delta(24)-sterol reductase	0.0125698	0.810846	0.719285	-0.3025	0.1431	0	0.845567	8.61655e+06	7.28587e+06	1.10096e+07	6.22353e+06	4.41358e+06	1.01582e+07
Q9Y4J8	DTNA	Dystrobrevin alpha	0.0335196	0.81124	0.348343	-0.3018	0.458	0	0.819603	3.29507e+06	2.70065e+06	3.555e+06	3.03513e+06	2.28634e+06	3.11496e+06
O15305	PMM2	Phosphomannomutase 2	0.0111732	0.811296	0.34041	-0.3017	0.468	0	0.811461	1.6486e+06	1.33777e+06	1.48437e+06	1.81283e+06	1.1602e+06	1.51534e+06
Q9UBM7	DHCR7	7-dehydrocholesterol reductase	0.0837989	0.811521	0.5343	-0.3013	0.2722	0	0.840637	2.2972e+07	1.93111e+07	2.46745e+07	2.12695e+07	1.42485e+07	2.43738e+07
Q9BZD4	NUF2	Kinetochore protein Nuf2	0.00418994	0.813492	0.0906954	-0.2978	1.042	0	0.81243	4.94726e+06	4.01931e+06	5.21199e+06	4.68254e+06	3.85659e+06	4.18202e+06
O14964	HGS	Hepatocyte growth factor-regulated tyrosine kinase substrate	0.0712291	0.813718	0.461816	-0.2974	0.3355	0	0.83365	3.85089e+06	3.21029e+06	4.00444e+06	3.69733e+06	2.50208e+06	3.9185e+06
Q9C0E8	LNPK	Endoplasmic reticulum junction formation protein lunapark	0.00418994	0.813943	0.430324	-0.297	0.3662	0	0.802211	484870	388968	577061	392679	422224	355712
P51654	GPC3	Glypican-3	0.00139665	0.814225	0.741114	-0.2965	0.1301	0	0.922768	7.72266e+06	7.12623e+06	6.80923e+06	8.63609e+06	1.05687e+07	3.68378e+06
Q96HR3	MED30	Mediator of RNA polymerase II transcription subunit 30	0	0.814903	0.387375	-0.2953	0.4119	0	0.819591	397772	326010	439256	356288	275639	376382
Q13136	PPFIA1	Liprin-alpha-1	0.0195531	0.815185	0.356001	-0.2948	0.4485	0	0.826908	8.7957e+06	7.27324e+06	8.72431e+06	8.86709e+06	6.03863e+06	8.50784e+06
Q9ULJ6	ZMIZ1	Zinc finger MIZ domain-containing protein 1	0	0.815242	0.975338	-0.2947	0.01085	0	0.666056	482588	321431	100	482588	321431	100
Q9NXX6	NSMCE4A	Non-structural maintenance of chromosomes element 4 homolog A	0.00139665	0.81592	0.674152	-0.2935	0.1712	0	0.885896	1.7566e+06	1.55617e+06	1.80877e+06	1.70443e+06	944197	2.16813e+06
Q9Y5A7	NUB1	NEDD8 ultimate buster 1	0.00558659	0.816373	0.645198	-0.2927	0.1903	0	0.874465	2.62542e+06	2.29584e+06	2.7162e+06	2.53464e+06	1.4673e+06	3.12438e+06
P56385	ATP5ME	ATP synthase subunit e, mitochondrial	0.0698324	0.816373	0.557218	-0.2927	0.254	0	0.843518	4.44908e+06	3.75288e+06	4.83473e+06	4.06342e+06	2.7369e+06	4.76886e+06
A6NIH7	UNC119B	Protein unc-119 homolog B	0.00558659	0.817675	0.467484	-0.2904	0.3302	0	0.80655	1.4676e+06	1.18369e+06	1.75789e+06	1.17731e+06	1.05884e+06	1.30854e+06
Q9Y676	MRPS18B	28S ribosomal protein S18b, mitochondrial	0.0935754	0.819207	0.66753	-0.2877	0.1755	0	0.880291	9.89269e+06	8.70844e+06	9.20872e+06	1.05767e+07	5.46149e+06	1.19554e+07
Q9HAU0	PLEKHA5	Pleckstrin homology domain-containing family A member 5	0.0907821	0.819889	0.0281115	-0.2865	1.551	0	0.820449	4.97458e+06	4.08138e+06	5.06198e+06	4.88717e+06	3.96471e+06	4.19805e+06
O00411	POLRMT	DNA-directed RNA polymerase, mitochondrial	0.0684358	0.819946	0.21942	-0.2864	0.6587	0	0.817259	8.00352e+06	6.54095e+06	8.80039e+06	7.20666e+06	6.20255e+06	6.87935e+06
O15446	POLR1G	DNA-directed RNA polymerase I subunit RPA34	0.0432961	0.82023	0.774056	-0.2859	0.1112	0	0.971807	2.175e+06	2.11368e+06	2.29645e+06	2053545	975974	3.25139e+06
O60237	PPP1R12B	Protein phosphatase 1 regulatory subunit 12B	0.00698324	0.820685	0.649598	-0.2851	0.1874	0	0.783341	3.62784e+07	2.84183e+07	4.82212e+07	2.43355e+07	3.25966e+07	2.42401e+07
O60573	EIF4E2	Eukaryotic translation initiation factor 4E type 2	0.075419	0.820969	0.433651	-0.2846	0.3629	0	0.837024	3.53014e+06	2.95481e+06	3.42262e+06	3.63766e+06	2.3724e+06	3.53722e+06
Q9NZL4	HSPBP1	Hsp70-binding protein 1	0.0460894	0.821254	0.169855	-0.2841	0.7699	0	0.820062	4.59587e+06	3.7689e+06	4.93426e+06	4.25749e+06	3.99209e+06	3.54572e+06
O95707	POP4	Ribonuclease P protein subunit p29	0.0251397	0.821994	0.434001	-0.2828	0.3625	0	0.824163	3.10327e+06	2.5576e+06	3.51453e+06	2.69201e+06	2.17255e+06	2.94266e+06
O75127	PTCD1	Pentatricopeptide repeat-containing protein 1, mitochondrial	0.00837989	0.822051	0.210369	-0.2827	0.677	0	0.827338	1.98335e+06	1.6409e+06	1.93102e+06	2.03569e+06	1.4746e+06	1.8072e+06
O43824	GTPBP6	Putative GTP-binding protein 6	0.00558659	0.822165	0.122065	-0.2825	0.9134	0	0.823859	516550	425564	538508	494591	399325	451803
P14550	AKR1A1	Aldo-keto reductase family 1 member A1	0.0698324	0.822735	0.467509	-0.2815	0.3302	0	0.804526	3.38858e+06	2.7262e+06	2.67247e+06	4.10468e+06	2.59936e+06	2.85304e+06
P54198	HIRA	Protein HIRA	0.023743	0.822963	0.151285	-0.2811	0.8202	0	0.823581	863047	710789	819474	906619	661698	759880
Q99720	SIGMAR1	Sigma non-opioid intracellular receptor 1	0.0027933	0.823134	0.455162	-0.2808	0.3418	0	0.825643	3.37796e+06	2.78899e+06	3.84643e+06	2.9095e+06	3.23121e+06	2.34677e+06
Q16762	TST	Thiosulfate sulfurtransferase	0.0293296	0.823591	0.788662	-0.28	0.1031	0	0.866927	3.83153e+06	3.32166e+06	5.23141e+06	2.43166e+06	1.77384e+06	4.86948e+06
O14727	APAF1	Apoptotic protease-activating factor 1	0	0.824391	0.879316	-0.2786	0.05585	0	1.29341	662696	857136	857013	468380	177418	1.53685e+06
Q13576	IQGAP2	Ras GTPase-activating-like protein IQGAP2	0.0810056	0.824962	0.667674	-0.2776	0.1754	0	0.836021	1.09173e+07	9.12706e+06	1.35263e+07	8.30823e+06	6.46885e+06	1.17853e+07
Q8N138	ORMDL3	ORM1-like protein 3	0.00139665	0.825077	0.712513	-0.2774	0.1472	0	0.885654	823250	729115	960700	685801	440482	1.01775e+06
P53602	MVD	Diphosphomevalonate decarboxylase	0	0.825134	0.241342	-0.2773	0.6174	0	0.830188	1.5987e+06	1.32723e+06	1.51175e+06	1.68566e+06	1461381	1.19307e+06
Q96EB6	SIRT1	NAD-dependent protein deacetylase sirtuin-1	0.00837989	0.825534	0.800179	-0.2766	0.09681	0	0.869051	837599	727916	1.16052e+06	514678	377472	1.07836e+06
P46937	YAP1	Transcriptional coactivator YAP1	0.0712291	0.825706	0.787208	-0.2763	0.1039	0	0.69569	2.03276e+06	1.41417e+06	918568	3.14696e+06	1.29449e+06	1.53386e+06
Q86YS3	RAB11FIP4	Rab11 family-interacting protein 4	0.00139665	0.826049	0.5458	-0.2757	0.263	0	0.852703	576184	491314	608600	543768	366697	615930
O00767	SCD	Stearoyl-CoA desaturase	0.0195531	0.826049	0.626554	-0.2757	0.203	0	0.855848	4.41218e+06	3.77616e+06	5.02953e+06	3.79484e+06	2664374	4.88794e+06
O43837	IDH3B	Isocitrate dehydrogenase [NAD] subunit beta, mitochondrial	0.0963687	0.826049	0.701208	-0.2757	0.1542	0	0.892611	1.61134e+07	1.4383e+07	1.80339e+07	1.41928e+07	8.71656e+06	2.00493e+07
Q9NYY8	FASTKD2	FAST kinase domain-containing protein 2, mitochondrial	0.0181564	0.826164	0.686203	-0.2755	0.1635	0	0.881428	3.1304e+06	2.75922e+06	3.53444e+06	2.72636e+06	1.74104e+06	3.77741e+06
Q9ULF5	SLC39A10	Zinc transporter ZIP10	0	0.826737	0.773089	-0.2745	0.1118	0	0.96927	801963	777319	788475	815450	371615	1183022
Q6NYC1	JMJD6	Bifunctional arginine demethylase and lysyl-hydroxylase JMJD6	0.00558659	0.827884	0.799805	-0.2725	0.09702	0	0.895485	192300	172202	258617	125983	86743.9	257660
Q9Y5X2	SNX8	Sorting nexin-8	0	0.828056	0.520593	-0.2722	0.2835	0	0.843968	456759	385490	502287	411231	300638	470342
Q9H2W6	MRPL46	39S ribosomal protein L46, mitochondrial	0.0865922	0.828171	0.518397	-0.272	0.2853	0	0.851098	1.168e+07	9.94085e+06	1.24617e+07	1.08984e+07	7.6562e+06	1.22255e+07
Q9BT73	PSMG3	Proteasome assembly chaperone 3	0.00418994	0.828573	0.56124	-0.2713	0.2509	0	0.857863	3.98346e+06	3.41726e+06	4.13686e+06	3.83006e+06	2.51798e+06	4.31654e+06
Q86SX6	GLRX5	Glutaredoxin-related protein 5, mitochondrial	0.027933	0.829435	0.385747	-0.2698	0.4137	0	0.827854	5.35482e+06	4.433e+06	4.66032e+06	6.04931e+06	4.91432e+06	3.95169e+06
Q9H840	GEMIN7	Gem-associated protein 7	0.0223464	0.831507	0.532881	-0.2662	0.2734	0	0.85498	801054	684886	838102	764007	522033	847739
Q01433	AMPD2	AMP deaminase 2	0.0153631	0.831795	0.207164	-0.2657	0.6837	0	0.828505	3.21473e+06	2.66342e+06	3.50793e+06	2.92154e+06	2.55649e+06	2.77035e+06
Q6P4A7	SFXN4	Sideroflexin-4	0.00977654	0.831853	0.598409	-0.2656	0.223	0	0.865051	6.45442e+06	5.5834e+06	6867032	6.0418e+06	4.0082e+06	7.1586e+06
Q9NZD2	GLTP	Glycolipid transfer protein	0.00139665	0.832083	0.554223	-0.2652	0.2563	0	0.859827	469563	403743	474820	464306	300722	506764
Q86XI2	NCAPG2	Condensin-2 complex subunit G2	0.0181564	0.832083	0.50518	-0.2652	0.2966	0	0.852245	1.3316e+07	1.13485e+07	1.40354e+07	1.25965e+07	8.85083e+06	1.38461e+07
P20962	PTMS	Parathymosin	0.0837989	0.832083	0.248554	-0.2652	0.6046	0	0.8264	1.34128e+06	1.10844e+06	1.19856e+06	1.484e+06	1.15777e+06	1.0591e+06
Q9NYP7	ELOVL5	Elongation of very long chain fatty acids protein 5	0.0600559	0.832199	0.181193	-0.265	0.7419	0	0.830482	746168	619679	801214	691123	586708	652650
Q8WVX9	FAR1	Fatty acyl-CoA reductase 1	0.0363128	0.832314	0.597707	-0.2648	0.2235	0	0.865094	3.76078e+06	3.25342e+06	3.99273e+06	3.52882e+06	2.33842e+06	4.16843e+06
Q9NX05	FAM120C	Constitutive coactivator of PPAR-gamma-like protein 2	0	0.832603	0.636995	-0.2643	0.1959	0	0.795883	3.58862e+06	2.85612e+06	2.48615e+06	4691093	2.56663e+06	3145615
P50336	PPOX	Protoporphyrinogen oxidase	0.0153631	0.832718	0.699049	-0.2641	0.1555	0	0.901625	289056	260620	303820	274292	159789	361451
Q96GW7	BCAN	Brevican core protein	0	0.832833	0.656585	-0.2639	0.1827	0	0.856244	420850	360350	498046	343653	254874	465826
Q9UPN4	CEP131	Centrosomal protein of 131 kDa	0.0181564	0.832891	0.649726	-0.2638	0.1873	0	0.879853	1.46407e+07	1.28817e+07	1.36775e+07	1.5604e+07	1.7089e+07	8.67441e+06
Q13445	TMED1	Transmembrane emp24 domain-containing protein 1	0.00139665	0.833469	0.429426	-0.2628	0.3671	0	0.837866	878830	736342	976604	781055	628202	844481
O75818	RPP40	Ribonuclease P protein subunit p40	0.0125698	0.833989	0.676784	-0.2619	0.1695	0	0.788891	1.0259e+06	809327	673878	1.37793e+06	717581	901072
Q14789	GOLGB1	Golgin subfamily B member 1	0.0418994	0.834104	0.540084	-0.2617	0.2675	0	0.856749	2.70313e+06	2.31591e+06	2.6314e+06	2.77487e+06	1.75604e+06	2.87577e+06
P18887	XRCC1	DNA repair protein XRCC1	0.0851955	0.835204	0.0794564	-0.2598	1.1	0	0.834973	3.07899e+06	2.57087e+06	2.92522e+06	3.23275e+06	2.51135e+06	2.63039e+06
O00115	DNASE2	Deoxyribonuclease-2-alpha	0.00698324	0.835262	0.623825	-0.2597	0.2049	0	0.865717	814734	705329	722873	906596	905903	504755
Q9H9C1	VIPAS39	Spermatogenesis-defective protein 39 homolog	0.00977654	0.835493	0.698339	-0.2593	0.1559	0	0.901585	339677	306248	351356	327998	189903	422593
Q9NV70	EXOC1	Exocyst complex component 1	0.0181564	0.835957	0.719597	-0.2585	0.1429	0	0.901354	3.40827e+06	3.07205e+06	2.95897e+06	3.85756e+06	1.87038e+06	4.27372e+06
P47985	UQCRFS1	Cytochrome b-c1 complex subunit Rieske, mitochondrial	0.0921788	0.83613	0.575761	-0.2582	0.2398	0	0.863382	1.94866e+07	1.68244e+07	1.83629e+07	2.06102e+07	1.2491e+07	21157681
Q6ICG6	KIAA0930	Uncharacterized protein KIAA0930	0	0.836188	0.0392806	-0.2581	1.406	0	0.837374	218761	183185	226915	210608	183143	183227
Q96EK6	GNPNAT1	Glucosamine 6-phosphate N-acetyltransferase	0.0111732	0.836362	0.679978	-0.2578	0.1675	0	0.853976	1.0883e+06	929384	849794	1.32681e+06	1.20001e+06	658755
O75874	IDH1	Isocitrate dehydrogenase [NADP] cytoplasmic	0.0865922	0.836478	0.25245	-0.2576	0.5978	0	0.832143	2.01451e+07	1.67636e+07	1.7888e+07	2.24023e+07	1.6808e+07	1.67193e+07
Q8WUK0	PTPMT1	Phosphatidylglycerophosphatase and protein-tyrosine phosphatase 1	0.0139665	0.837232	0.573264	-0.2563	0.2416	0	0.863679	858976	741879	912249	805702	553642	930116
Q13546	RIPK1	Receptor-interacting serine/threonine-protein kinase 1	0.00977654	0.837348	0.630519	-0.2561	0.2003	0	0.869479	4.44274e+06	3.86287e+06	3.96564e+06	4.91984e+06	2.74668e+06	4.97906e+06
Q9Y3C8	UFC1	Ubiquitin-fold modifier-conjugating enzyme 1	0.0167598	0.837523	0.436033	-0.2558	0.3605	0	0.830087	2.48328e+06	2.06134e+06	2.09457e+06	2.87199e+06	1.87493e+06	2.24775e+06
Q8N5M9	JAGN1	Protein jagunal homolog 1	0.0167598	0.837639	0.203547	-0.2556	0.6913	0	0.836929	3.24036e+06	2.71195e+06	3.49347e+06	2.98725e+06	2.56165e+06	2.86225e+06
Q9H299	SH3BGRL3	SH3 domain-binding glutamic acid-rich-like protein 3	0.0335196	0.837929	0.461025	-0.2551	0.3363	0	0.836117	1.8395e+06	1.53804e+06	1.55647e+06	2.12254e+06	1.3528e+06	1.72328e+06
Q9Y4A5	TRRAP	Transformation/transcription domain-associated protein	0.0181564	0.837987	0.465255	-0.255	0.3323	0	0.847125	3.31527e+06	2.80845e+06	3.61078e+06	3.01976e+06	2.3195e+06	3.2974e+06
Q8WWC4	MAIP1	m-AAA protease-interacting protein 1, mitochondrial	0.0349162	0.839382	0.376114	-0.2526	0.4247	0	0.849002	5.05301e+06	4.29002e+06	5.05331e+06	5.05272e+06	3.62847e+06	4.95157e+06
O14733	MAP2K7	Dual specificity mitogen-activated protein kinase kinase 7	0.00418994	0.839731	0.531874	-0.252	0.2742	0	0.860116	3.19171e+06	2.74524e+06	2.98703e+06	3.39639e+06	2.14484e+06	3.34565e+06
Q9BUI4	POLR3C	DNA-directed RNA polymerase III subunit RPC3	0.0572626	0.840139	0.203071	-0.2513	0.6924	0	0.839995	1.56478e+06	1.31441e+06	1.51461e+06	1.61495e+06	1.19969e+06	1.42913e+06
Q13724	MOGS	Mannosyl-oligosaccharide glucosidase	0.0824022	0.840547	0.752859	-0.2506	0.1233	0	0.86814	1.18174e+07	1.02592e+07	1.51486e+07	8.48618e+06	6.47327e+06	1.40451e+07
P52758	RIDA	2-iminobutanoate/2-iminopropanoate deaminase	0.0167598	0.840663	0.980885	-0.2504	0.008382	0	0.707816	1.0385e+06	735064	100	1.0385e+06	735064	100
O14772	FPGT	Fucose-1-phosphate guanylyltransferase	0	0.841246	0.367408	-0.2494	0.4349	0	0.84015	860716	723130	956426	765006	794826	651435
Q9NRG1	PRTFDC1	Phosphoribosyltransferase domain-containing protein 1	0.00558659	0.841246	0.979922	-0.2494	0.008808	0	0.707783	650091	460123	100	650091	100	460123
Q9NR33	POLE4	DNA polymerase epsilon subunit 4	0.0125698	0.841596	0.291849	-0.2488	0.5348	0	0.845273	2.29545e+06	1.94028e+06	2.16711e+06	2.42378e+06	1.72575e+06	2.15481e+06
Q9BYD2	MRPL9	39S ribosomal protein L9, mitochondrial	0.0614525	0.841946	0.681687	-0.2482	0.1664	0	0.891763	1.83613e+07	1.63739e+07	1.71213e+07	1.96013e+07	1.07776e+07	2.19702e+07
Q99543	DNAJC2	DnaJ homolog subfamily C member 2	0.0405028	0.842121	0.618518	-0.2479	0.2086	0	0.829906	6.98728e+06	5.79879e+06	8.6349e+06	5.33967e+06	4.81838e+06	6.7792e+06
Q9GZK7	OR11A1	Olfactory receptor 11A1	0	0.842355	0.566999	-0.2475	0.2464	0	0.863442	5.48084e+06	4.73238e+06	5.91035e+06	5.05133e+06	5.84757e+06	3.6172e+06
Q9UBB6	NCDN	Neurochondrin	0.00698324	0.842472	0.368846	-0.2473	0.4332	0	0.848523	2.41317e+06	2.04763e+06	2.56312e+06	2.26321e+06	1.77027e+06	2.32499e+06
Q9H223	EHD4	EH domain-containing protein 4	0.0167598	0.842764	0.609925	-0.2468	0.2147	0	0.870882	8.60353e+06	7.49266e+06	9.3434e+06	7.86367e+06	5.50276e+06	9.48256e+06
Q9NP77	SSU72	RNA polymerase II subunit A C-terminal domain phosphatase SSU72	0.00698324	0.843582	0.157545	-0.2454	0.8026	0	0.8413	709108	596572	656410	761806	586174	606970
Q8NBN7	RDH13	Retinol dehydrogenase 13	0.00837989	0.843933	0.672177	-0.2448	0.1725	0	0.851498	470586	400703	574855	366318	298311	503095
Q9BZK7	TBL1XR1	F-box-like/WD repeat-containing protein TBL1XR1	0.0628492	0.844869	0.618591	-0.2432	0.2086	0	0.871784	5.663e+06	4.93691e+06	5.11053e+06	6.21546e+06	3.62537e+06	6.24845e+06
P60520	GABARAPL2	Gamma-aminobutyric acid receptor-associated protein-like 2	0.0111732	0.845104	0.31858	-0.2428	0.4968	0	0.850775	8.42142e+06	7.16473e+06	8.12012e+06	8.72272e+06	8.03994e+06	6.28953e+06
Q14919	DRAP1	Dr1-associated corepressor	0.0223464	0.846569	0.271828	-0.2403	0.5657	0	0.849207	2.18688e+06	1.85711e+06	2.24103e+06	2.13274e+06	1.65748e+06	2.05675e+06
Q9H0E2	TOLLIP	Toll-interacting protein	0.0181564	0.846804	0.13107	-0.2399	0.8825	0	0.84859	759525	644526	768226	750824	602355	686696
Q8WYL5	SSH1	Protein phosphatase Slingshot homolog 1	0.0139665	0.847098	0.31303	-0.2394	0.5044	0	0.851741	2853764	2.43067e+06	2699592	3007936	2.15839e+06	2.70295e+06
Q13451	FKBP5	Peptidyl-prolyl cis-trans isomerase FKBP5	0.0670391	0.84892	0.530558	-0.2363	0.2753	0	0.857501	7.73042e+06	6.62884e+06	8.61787e+06	6.84297e+06	5.42127e+06	7.83641e+06
Q01804	OTUD4	OTU domain-containing protein 4	0.0949721	0.849391	0.154967	-0.2355	0.8098	0	0.851821	7.64955e+06	6.51605e+06	7.64211e+06	7.65699e+06	6.98767e+06	6.04443e+06
P54252	ATXN3	Ataxin-3	0	0.849744	0.635679	-0.2349	0.1968	0	0.858635	599937	515127	708344	491530	398352	631902
Q15785	TOMM34	Mitochondrial import receptor subunit TOM34	0.0446927	0.850038	0.276816	-0.2344	0.5578	0	0.85014	3.96831e+06	3.37362e+06	3.62935e+06	4.30727e+06	3.60263e+06	3.14461e+06
P07384	CAPN1	Calpain-1 catalytic subunit	0.0418994	0.850333	0.828589	-0.2339	0.08166	0	0.890797	1.10719e+07	9.86277e+06	1.53376e+07	6.80613e+06	5.15748e+06	1.45681e+07
Q16512	PKN1	Serine/threonine-protein kinase N1	0.00977654	0.851454	0.8152	-0.232	0.08874	0	0.899133	319796	287539	428999	210593	157466	417612
Q96CS3	FAF2	FAS-associated factor 2	0.0977654	0.851454	0.550329	-0.232	0.2594	0	0.862842	1.23707e+07	1.0674e+07	1.36402e+07	1.11012e+07	8.55047e+06	1.27975e+07
Q8WYA6	CTNNBL1	Beta-catenin-like protein 1	0.0851955	0.852162	0.411868	-0.2308	0.3852	0	0.862401	3.34571e+06	2.88534e+06	3.32698e+06	3.36443e+06	2.43597e+06	3.33471e+06
P85298	ARHGAP8	Rho GTPase-activating protein 8	0.0027933	0.852635	0.453449	-0.23	0.3435	0	0.845478	1.04894e+06	886853	1.20839e+06	889488	817761	955945
P11234	RALB	Ras-related protein Ral-B	0.023743	0.853226	0.546013	-0.229	0.2628	0	0.834296	893098	745108	704279	1.08192e+06	784350	705866
Q9Y4Y9	LSM5	U6 snRNA-associated Sm-like protein LSm5	0.0698324	0.854173	0.363452	-0.2274	0.4396	0	0.850839	3.80674e+06	3.23893e+06	3.36264e+06	4.25085e+06	3.45403e+06	3.02383e+06
Q6UXV4	APOOL	MICOS complex subunit MIC27	0.0027933	0.854291	0.677363	-0.2272	0.1692	0	0.900344	621137	559238	625700	616574	382931	735544
P53611	RABGGTB	Geranylgeranyl transferase type-2 subunit beta	0.0181564	0.854528	0.290865	-0.2268	0.5363	0	0.850498	2.17518e+06	1.84998e+06	1.94896e+06	2401394	1.92454e+06	1.77543e+06
P52789	HK2	Hexokinase-2	0.0768156	0.854587	0.571122	-0.2267	0.2433	0	0.878127	8.95213e+06	7.8611e+06	9.13716e+06	8.7671e+06	6.05997e+06	9.66223e+06
Q9UK45	LSM7	U6 snRNA-associated Sm-like protein LSm7	0.0642458	0.854824	0.346559	-0.2263	0.4602	0	0.848463	3800577	3.22465e+06	3327109	4274045	3.33265e+06	3.11664e+06
Q9Y4E5	ZNF451	E3 SUMO-protein ligase ZNF451	0.0907821	0.85607	0.322327	-0.2242	0.4917	0	0.853895	596241	509127	538622	653859	473537	544717
Q9BTV4	TMEM43	Transmembrane protein 43	0.00977654	0.856426	0.0722881	-0.2236	1.141	0	0.855553	2.94706e+06	2.52137e+06	2.8229e+06	3071229	2.49012e+06	2.55262e+06
Q08AM6	VAC14	Protein VAC14 homolog	0.00418994	0.856841	0.154428	-0.2229	0.8113	0	0.854734	6.78684e+06	5.80094e+06	7.25377e+06	6.31992e+06	5.83796e+06	5.76393e+06
Q9NR77	PXMP2	Peroxisomal membrane protein 2	0.0027933	0.85696	0.693987	-0.2227	0.1586	0	0.883429	678317	599245	787783	568851	425821	772668
Q9UI10	EIF2B4	Translation initiation factor eIF-2B subunit delta	0.0614525	0.85696	0.729616	-0.2227	0.1369	0	0.91969	7.67664e+06	7.06013e+06	8.09015e+06	7.26314e+06	4.46955e+06	9650718
Q9UI30	TRMT112	Multifunctional methyltransferase subunit TRM112-like protein	0.0684358	0.858089	0.413402	-0.2208	0.3836	0	0.866112	3.83488e+06	3.32143e+06	3.94038e+06	3.72937e+06	2.83749e+06	3.80538e+06
Q9Y619	SLC25A15	Mitochondrial ornithine transporter 1	0.0027933	0.858923	0.715042	-0.2194	0.1457	0	0.910858	2.07848e+06	1.8932e+06	1.93149e+06	2.22547e+06	1.24565e+06	2.54075e+06
Q15120	PDK3	[Pyruvate dehydrogenase (acetyl-transferring)] kinase isozyme 3, mitochondrial	0.0153631	0.858923	0.598936	-0.2194	0.2226	0	0.849471	4.2973e+06	3.65043e+06	5.16748e+06	3.42713e+06	3.16085e+06	4.14002e+06
Q9NVV0	TMEM38B	Trimeric intracellular cation channel type B	0.0181564	0.859459	0.321778	-0.2185	0.4924	0	0.855286	1.59333e+08	1.36275e+08	1.76261e+08	1.42404e+08	1.42271e+08	1.30279e+08
O95630	STAMBP	STAM-binding protein	0.0027933	0.859637	0.620713	-0.2182	0.2071	0	0.845917	1.74825e+06	1.47887e+06	1.37469e+06	2.12181e+06	1.26957e+06	1.68818e+06
Q9UDW1	UQCR10	Cytochrome b-c1 complex subunit 9	0.0111732	0.859756	0.592797	-0.218	0.2271	0	0.877157	6.42282e+06	5.63382e+06	7.01786e+06	5827783	4410102	6.85754e+06
Q14657	LAGE3	EKC/KEOPS complex subunit LAGE3	0.0363128	0.859935	0.63196	-0.2177	0.1993	0	0.875398	1.32998e+06	1.16426e+06	1.51167e+06	1.14829e+06	898015	1.4305e+06
Q9UN37	VPS4A	Vacuolar protein sorting-associated protein 4A	0.0195531	0.860591	0.590497	-0.2166	0.2288	0	0.875218	8.60379e+06	7.53019e+06	9.51115e+06	7.69643e+06	5.9587e+06	9.10167e+06
Q96PU8	QKI	KH domain-containing RNA-binding protein QKI	0.0349162	0.860591	0.228769	-0.2166	0.6406	0	0.863835	9.12521e+06	7.88268e+06	9306654	8.94376e+06	7.21277e+06	8.55258e+06
P36639	NUDT1	Oxidized purine nucleoside triphosphate hydrolase	0.0824022	0.860651	0.295225	-0.2165	0.5298	0	0.858215	1.32381e+06	1136109	1.45838e+06	1.18923e+06	1098594	1173624
Q5JTW2	CEP78	Centrosomal protein of 78 kDa	0.00418994	0.860711	0.600005	-0.2164	0.2218	0	0.884375	1.9065e+06	1.68606e+06	1.82384e+06	1.98916e+06	1.29488e+06	2.07723e+06
O95139	NDUFB6	NADH dehydrogenase [ubiquinone] 1 beta subcomplex subunit 6	0	0.861128	0.305838	-0.2157	0.5145	0	0.863015	324218	279805	344769	303667	254920	304690
Q9BVQ7	SPATA5L1	Ribosome biogenesis protein SPATA5L1	0.0153631	0.861128	0.770726	-0.2157	0.1131	0	0.94666	1.18111e+06	1.11811e+06	1.15452e+06	1.20769e+06	648892	1.58732e+06
Q8TCJ2	STT3B	Dolichyl-diphosphooligosaccharide--protein glycosyltransferase subunit STT3B	0.0167598	0.861606	0.801766	-0.2149	0.09595	0	0.956794	4.90074e+06	4.689e+06	5.67918e+06	4.12231e+06	2.54201e+06	6.83598e+06
Q96N66	MBOAT7	Lysophospholipid acyltransferase 7	0.00418994	0.861845	0.642128	-0.2145	0.1924	0	0.88849	1.11227e+06	988242	1.17307e+06	1.05147e+06	729523	1.24696e+06
Q9NRG9	AAAS	Aladin	0.0907821	0.861964	0.7026	-0.2143	0.1533	0	0.903764	4.8715e+06	4.40269e+06	5355500	4.3875e+06	3.03106e+06	5.77431e+06
O75146	HIP1R	Huntingtin-interacting protein 1-related protein	0.0139665	0.862024	0.66812	-0.2142	0.1751	0	0.897614	3.80815e+06	3.41825e+06	3.98337e+06	3.63292e+06	2.43538e+06	4.40111e+06
A4D1E9	GTPBP10	GTP-binding protein 10	0.0111732	0.862203	0.781664	-0.2139	0.107	0	0.927177	2.01204e+06	1.86552e+06	1.64605e+06	2.37803e+06	1.10501e+06	2.62602e+06
Q9Y4C2	TCAF1	TRPM8 channel-associated factor 1	0.0195531	0.862502	0.441468	-0.2134	0.3551	0	0.870607	324303	282341	335194	313412	239564	325118
P63098	PPP3R1	Calcineurin subunit B type 1	0.00139665	0.862921	0.214281	-0.2127	0.669	0	0.861602	966216	832494	893507	1.03892e+06	858722	806266
Q9Y6J9	TAF6L	TAF6-like RNA polymerase II p300/CBP-associated factor-associated factor 65 kDa subunit 6L	0.0446927	0.86328	0.448449	-0.2121	0.3483	0	0.869917	689581	599879	735384	643778	515106	684651
Q9BZE1	MRPL37	39S ribosomal protein L37, mitochondrial	0.0851955	0.863459	0.184335	-0.2118	0.7344	0	0.864874	3.38998e+07	2.93191e+07	3.40743e+07	3.37254e+07	2.7167e+07	3.14712e+07
Q9NSV4	DIAPH3	Protein diaphanous homolog 3	0.0698324	0.863998	0.58941	-0.2109	0.2296	0	0.887226	1.38991e+06	1.23316e+06	1.4133e+06	1.36651e+06	955272	1.51105e+06
Q9HC07	TMEM165	Transmembrane protein 165	0.0460894	0.864238	0.981592	-0.2105	0.008069	0	0.745039	320442	238742	100	320442	238742	100
Q9Y5P6	GMPPB	Mannose-1-phosphate guanyltransferase beta	0.0111732	0.864897	0.716046	-0.2094	0.1451	0	0.916009	3.02428e+06	2.77027e+06	3.03035e+06	3.01821e+06	1.84509e+06	3.69545e+06
Q8TB52	FBXO30	F-box only protein 30	0.0153631	0.864897	0.588442	-0.2094	0.2303	0	0.866676	387050	335447	447523	326576	280746	390147
Q9UKL0	RCOR1	REST corepressor 1	0.0879888	0.865017	0.587787	-0.2092	0.2308	0	0.869834	1.29211e+06	1.12392e+06	1.1114e+06	1.47282e+06	924758	1.32309e+06
Q9BRT9	GINS4	DNA replication complex GINS protein SLD5	0.0027933	0.865077	0.735025	-0.2091	0.1337	0	0.82044	2.07665e+06	1.70377e+06	1.37224e+06	2.78106e+06	1.90362e+06	1.50391e+06
Q9HC36	MRM3	rRNA methyltransferase 3, mitochondrial	0.0544693	0.865317	0.211116	-0.2087	0.6755	0	0.867139	8.63808e+06	7.49041e+06	8.8728e+06	8.40336e+06	8.05103e+06	6.92979e+06
Q66K14	TBC1D9B	TBC1 domain family member 9B	0.00558659	0.865797	0.64014	-0.2079	0.1937	0	0.89414	1.80224e+06	1.61145e+06	1.72046e+06	1.88401e+06	1.2e+06	2.02291e+06
Q96KG9	SCYL1	N-terminal kinase-like protein	0.0167598	0.866637	0.791632	-0.2065	0.1015	0	0.96319	4.07298e+06	3.92305e+06	4.30603e+06	3.83993e+06	2.19961e+06	5.64649e+06
Q07864	POLE	DNA polymerase epsilon catalytic subunit A	0.0335196	0.866817	0.349467	-0.2062	0.4566	0	0.863504	7.30609e+06	6.30884e+06	8.05321e+06	6.55896e+06	5.94182e+06	6.67585e+06
Q9NRN7	AASDHPPT	L-aminoadipate-semialdehyde dehydrogenase-phosphopantetheinyl transferase	0.0712291	0.866817	0.60091	-0.2062	0.2212	0	0.889071	1.58953e+07	1.41321e+07	1.68654e+07	1.49252e+07	1.10455e+07	1.72186e+07
Q9BTD8	RBM42	RNA-binding protein 42	0.0684358	0.866938	0.453271	-0.206	0.3436	0	0.871334	6.04497e+06	5.26719e+06	5532199	6.55775e+06	4.59194e+06	5.94244e+06
P78540	ARG2	Arginase-2, mitochondrial	0.00418994	0.866998	0.0179297	-0.2059	1.746	0	0.868772	1.10782e+06	962440	1.12027e+06	1.09536e+06	979181	945698
Q13464	ROCK1	Rho-associated protein kinase 1	0.0796089	0.868381	0.804086	-0.2036	0.0947	0	0.920053	9.47956e+06	8.7217e+06	1.1892e+07	7.06713e+06	5.20499e+06	1.22384e+07
Q8NEZ5	FBXO22	F-box only protein 22	0.0628492	0.869043	0.722548	-0.2025	0.1411	0	0.845342	4.96274e+06	4.19521e+06	3.54252e+06	6.38295e+06	3.45758e+06	4.93284e+06
Q03154	ACY1	Aminoacylase-1	0.00139665	0.869104	0.983911	-0.2024	0.007044	0	0.754683	703100	530618	703100	100	100	530618
Q9NQ88	TIGAR	Fructose-2,6-bisphosphatase TIGAR	0.0921788	0.869646	0.624416	-0.2015	0.2045	0	0.865382	2.36676e+06	2.04815e+06	1.94489e+06	2.78862e+06	1.71673e+06	2.37957e+06
P54687	BCAT1	Branched-chain-amino-acid aminotransferase, cytosolic	0.00837989	0.870068	0.396668	-0.2008	0.4016	0	0.875101	2.17087e+06	1.89973e+06	2.07126e+06	2.27048e+06	2127753	1.67171e+06
Q9Y2T2	AP3M1	AP-3 complex subunit mu-1	0.0977654	0.870551	0.699572	-0.2	0.1552	0	0.913891	1.37882e+07	1.26009e+07	1.38027e+07	1.37736e+07	8.80388e+06	16397875
A5PLN9	TRAPPC13	Trafficking protein particle complex subunit 13	0.00139665	0.872605	0.338599	-0.1966	0.4703	0	0.875091	548583	480060	518109	579057	434745	525375
P62253	UBE2G1	Ubiquitin-conjugating enzyme E2 G1	0.00139665	0.87327	0.406471	-0.1955	0.391	0	0.876935	1.2685e+06	1.11239e+06	1.35182e+06	1.18517e+06	1.23629e+06	988488
Q9HCJ3	RAVER2	Ribonucleoprotein PTB-binding 2	0.0027933	0.873331	0.584536	-0.1954	0.2332	0	0.874828	1.26817e+06	1.10943e+06	1.43316e+06	1.10318e+06	1.28927e+06	929585
Q9BQC6	MRPL57	Ribosomal protein 63, mitochondrial	0.0209497	0.873331	0.82409	-0.1954	0.08403	0	0.993661	4384425	4.35663e+06	3.96799e+06	4.80086e+06	2254249	6.45901e+06
Q96T51	RUFY1	RUN and FYVE domain-containing protein 1	0.0572626	0.873936	0.644391	-0.1944	0.1909	0	0.901279	8.72925e+06	7.8675e+06	8.70277e+06	8755740	5.93739e+06	9.7976e+06
Q9UM00	TMCO1	Calcium load-activated calcium channel	0.0418994	0.8743	0.626892	-0.1938	0.2028	0	0.897837	6.20169e+06	5568107	6.42986e+06	5.97352e+06	4.29212e+06	6.84409e+06
O00186	STXBP3	Syntaxin-binding protein 3	0.0181564	0.875027	0.651937	-0.1926	0.1858	0	0.904186	4.92599e+06	4.45401e+06	5.0751e+06	4.77687e+06	3.35482e+06	5.5532e+06
P17174	GOT1	Aspartate aminotransferase, cytoplasmic	0.0544693	0.875088	0.414583	-0.1925	0.3824	0	0.868801	2.61407e+07	2.27111e+07	2.28244e+07	2.94571e+07	2.21932e+07	2.32289e+07
P51570	GALK1	Galactokinase	0.0712291	0.875755	0.695507	-0.1914	0.1577	0	0.913244	2.06176e+07	1.88289e+07	2.12655e+07	1.99696e+07	1.34594e+07	2.41983e+07
Q9NRK6	ABCB10	ATP-binding cassette sub-family B member 10, mitochondrial	0.0209497	0.875877	0.622074	-0.1912	0.2062	0	0.889459	159254	141650	172342	146167	111721	171579
Q96BN2	TADA1	Transcriptional adapter 1	0.023743	0.876606	0.562923	-0.19	0.2496	0	0.89161	389082	346910	400062	378103	281659	412161
Q9H8H3	METTL7A	Putative methyltransferase-like protein 7A	0.00698324	0.878552	0.466532	-0.1868	0.3311	0	0.870304	837928	729253	954943	720914	702696	755810
Q8N4V1	MMGT1	ER membrane protein complex subunit 5	0.00418994	0.878674	0.722321	-0.1866	0.1413	0	0.892453	1.23597e+06	1.10305e+06	1.46015e+06	1.0118e+06	824807	1.38129e+06
P56381	ATP5F1E	ATP synthase subunit epsilon, mitochondrial	0.0544693	0.879222	0.465671	-0.1857	0.3319	0	0.871615	3.10739e+06	2.70844e+06	2.67843e+06	3536347	2.80992e+06	2.60697e+06
Q9NUQ3	TXLNG	Gamma-taxilin	0.0712291	0.879344	0.68248	-0.1855	0.1659	0	0.904737	4.63542e+06	4.19384e+06	4.22845e+06	5.0424e+06	3.13654e+06	5251141
Q15031	LARS2	Leucine--tRNA ligase, mitochondrial	0.0251397	0.879832	0.798206	-0.1847	0.09788	0	0.919935	6.32913e+06	5.82239e+06	7.72389e+06	4.93436e+06	3.72253e+06	7.92224e+06
Q9GZZ1	NAA50	N-alpha-acetyltransferase 50	0.0544693	0.880137	0.530293	-0.1842	0.2755	0	0.870852	1.21909e+07	1.06165e+07	1.01621e+07	1.42197e+07	1.10185e+07	1.02144e+07
Q8IX18	DHX40	Probable ATP-dependent RNA helicase DHX40	0.075419	0.88032	0.668537	-0.1839	0.1749	0	0.890291	1.58643e+06	1.41238e+06	1.81859e+06	1.35427e+06	1.12485e+06	1.69991e+06
Q9BPX5	ARPC5L	Actin-related protein 2/3 complex subunit 5-like protein	0.0391061	0.881053	0.484744	-0.1827	0.3145	0	0.891775	2.014e+06	1.79603e+06	2.00178e+06	2.02621e+06	2.05819e+06	1.53387e+06
Q13418	ILK	Integrin-linked protein kinase	0.0139665	0.881236	0.781481	-0.1824	0.1071	0	0.930013	6.66301e+06	6.19669e+06	7.70899e+06	5.61703e+06	4.02117e+06	8.37221e+06
Q99755	PIP5K1A	Phosphatidylinositol 4-phosphate 5-kinase type-1 alpha	0.027933	0.883131	0.27176	-0.1793	0.5658	0	0.885116	487800	431759	471389	504210	399300	464219
Q9BTT4	MED10	Mediator of RNA polymerase II transcription subunit 10	0	0.883193	0.657413	-0.1792	0.1822	0	0.863084	302294	260905	235129	369460	282751	239059
P10398	ARAF	Serine/threonine-protein kinase A-Raf	0.0586592	0.883193	0.535956	-0.1792	0.2709	0	0.896118	3.13935e+06	2.81323e+06	3.04831e+06	3.23039e+06	2.35473e+06	3.27173e+06
P23193	TCEA1	Transcription elongation factor A protein 1	0.0656425	0.883682	0.495571	-0.1784	0.3049	0	0.87922	1.09533e+07	9.63039e+06	9.51768e+06	1.2389e+07	8.94958e+06	1.03112e+07
Q5F1R6	DNAJC21	DnaJ homolog subfamily C member 21	0.0181564	0.884111	0.676204	-0.1777	0.1699	0	0.910425	2.75367e+06	2.50701e+06	2.9282e+06	2.57913e+06	3.11284e+06	1.90118e+06
P19174	PLCG1	1-phosphatidylinositol 4,5-bisphosphate phosphodiesterase gamma-1	0.0209497	0.884786	0.85283	-0.1766	0.06914	0	0.867079	5.88634e+06	5.10392e+06	8.30281e+06	3.46986e+06	3.22623e+06	6.98161e+06
Q9HD33	MRPL47	39S ribosomal protein L47, mitochondrial	0.0558659	0.884908	0.738415	-0.1764	0.1317	0	0.926281	1.09385e+07	1.01321e+07	1.02127e+07	1.16642e+07	7.07821e+06	1.3186e+07
Q5JRA6	MIA3	Transport and Golgi organization protein 1 homolog	0.0712291	0.885522	0.744429	-0.1754	0.1282	0	0.871148	3.78188e+06	3.29458e+06	2.81287e+06	4.75089e+06	2.67181e+06	3.91734e+06
Q15653	NFKBIB	NF-kappa-B inhibitor beta	0.00558659	0.886382	0.985148	-0.174	0.006499	0	0.78514	378269	296994	100	378269	100	296994
P61009	SPCS3	Signal peptidase complex subunit 3	0.027933	0.886935	0.75942	-0.1731	0.1195	0	0.927223	6.20865e+06	5.7568e+06	6.91467e+06	5.50262e+06	3.96127e+06	7.55234e+06
Q9BVS4	RIOK2	Serine/threonine-protein kinase RIO2	0.0195531	0.886996	0.141881	-0.173	0.8481	0	0.888117	5.61347e+06	4.98542e+06	5.71591e+06	5.51103e+06	5.21783e+06	4753009
Q8IYB7	DIS3L2	DIS3-like exonuclease 2	0	0.887058	0.846412	-0.1729	0.07242	0	0.769884	403158	310385	203089	603226	300888	319881
P18827	SDC1	Syndecan-1	0.0027933	0.887181	0.985437	-0.1727	0.006371	0	0.786722	418292	329079	100	418292	329079	100
P17655	CAPN2	Calpain-2 catalytic subunit	0.0293296	0.887488	0.38334	-0.1722	0.4164	0	0.887031	6.76844e+06	6.00382e+06	7.27363e+06	6.26324e+06	5.53992e+06	6.46771e+06
Q15629	TRAM1	Translocating chain-associated membrane protein 1	0.00558659	0.887673	0.842134	-0.1719	0.07462	0	0.989669	1.44865e+06	1.43369e+06	1.67864e+06	1.21867e+06	769466	2.0979e+06
Q03111	MLLT1	Protein ENL	0.0391061	0.887796	0.282863	-0.1717	0.5484	0	0.890688	530763	472744	513650	547876	437206	508282
P51812	RPS6KA3	Ribosomal protein S6 kinase alpha-3	0.0265363	0.887981	0.71601	-0.1714	0.1451	0	0.902189	1.43162e+07	1.29159e+07	1.641e+07	1.22223e+07	9.85948e+06	1.59723e+07
P41240	CSK	Tyrosine-protein kinase CSK	0.0740223	0.888165	0.644803	-0.1711	0.1906	0	0.906057	4.03688e+06	3.65764e+06	4.26061e+06	3.81314e+06	2.88853e+06	4.42676e+06
Q96C57	CUSTOS	Protein CUSTOS	0.0125698	0.888227	0.800631	-0.171	0.09657	0	0.952444	1.84796e+06	1.76008e+06	2.0657e+06	1.63023e+06	1.10199e+06	2.41817e+06
A6NFU8	PGPEP1L	Pyroglutamyl-peptidase 1-like protein	0	0.889028	0.0995253	-0.1697	1.002	0	0.888603	5.74338e+06	5103588	5863505	5.62326e+06	4928574	5278602
Q8WY22	BRI3BP	BRI3-binding protein	0.0111732	0.889028	0.497109	-0.1697	0.3035	0	0.900217	1.70806e+06	1.53763e+06	1.74582e+06	1.67031e+06	1.75397e+06	1.32128e+06
Q5VZE5	NAA35	N-alpha-acetyltransferase 35, NatC auxiliary subunit	0.00837989	0.889089	0.767007	-0.1696	0.1152	0	0.933611	2.18983e+06	2.04445e+06	2.40763e+06	1.97203e+06	1.38773e+06	2.70117e+06
Q8WUY3	PRUNE2	Protein prune homolog 2	0.00139665	0.889336	0.443354	-0.1692	0.3532	0	0.893873	1.01867e+06	910565	1.04487e+06	992479	800500	1.02063e+06
Q53GG5	PDLIM3	PDZ and LIM domain protein 3	0.0377095	0.890014	0.716669	-0.1681	0.1447	0	0.920902	1.10124e+06	1.01413e+06	1140924	1.06155e+06	741787	1.28647e+06
Q9NPF4	OSGEP	tRNA N6-adenosine threonylcarbamoyltransferase	0.027933	0.890199	0.691603	-0.1678	0.1601	0	0.891908	3.87848e+06	3.45925e+06	4.54876e+06	3.20821e+06	2.8258e+06	4.0927e+06
Q9BWW4	SSBP3	Single-stranded DNA-binding protein 3	0.00698324	0.890631	0.987324	-0.1671	0.00554	0	0.79451	1.03885e+06	825377	100	1.03885e+06	825377	100
P08047	SP1	Transcription factor Sp1	0.0293296	0.89094	0.987105	-0.1666	0.005637	0	0.79369	867863	688814	100	867863	100	688814
Q9NR46	SH3GLB2	Endophilin-B2	0.0377095	0.89094	0.712842	-0.1666	0.147	0	0.922159	479572	442242	498486	460659	325624	558860
Q9NXH9	TRMT1	tRNA (guanine(26)-N(2))-dimethyltransferase	0.0824022	0.89094	0.806573	-0.1666	0.09336	0	0.966832	3.36295e+06	3.25141e+06	3.481e+06	3.2449e+06	1.98094e+06	4.52188e+06
Q9UDX5	MTFP1	Mitochondrial fission process protein 1	0.00139665	0.891125	0.485576	-0.1663	0.3137	0	0.898953	2.08257e+06	1.87213e+06	2.12343e+06	2.0417e+06	1.62265e+06	2.12161e+06
Q13188	STK3	Serine/threonine-protein kinase 3	0.0405028	0.891558	0.56389	-0.1656	0.2488	0	0.880969	819014	721526	949716	688311	688988	754064
Q9NRN9	METTL5	rRNA N6-adenosine-methyltransferase METTL5	0.00558659	0.891681	0.986005	-0.1654	0.006121	0	0.793737	405466	321834	100	405466	100	321834
P67812	SEC11A	Signal peptidase complex catalytic subunit SEC11A	0.0111732	0.891929	0.785823	-0.165	0.1047	0	0.933741	4.43623e+06	4.14229e+06	5.08213e+06	3.79033e+06	2.78987e+06	5494701
Q4V328	GRIPAP1	GRIP1-associated protein 1	0.0111732	0.892238	0.668303	-0.1645	0.175	0	0.915656	421397	385855	423218	419577	298711	472999
O15498	YKT6	Synaptobrevin homolog YKT6	0.0935754	0.892238	0.709843	-0.1645	0.1488	0	0.919592	7.18207e+06	6.60457e+06	7.69831e+06	6.66582e+06	4.94999e+06	8.25915e+06
P32929	CTH	Cystathionine gamma-lyase	0.00558659	0.892485	0.56645	-0.1641	0.2468	0	0.89979	9268915	8.34008e+06	8.56098e+06	9.97685e+06	9.56565e+06	7.11451e+06
O43929	ORC4	Origin recognition complex subunit 4	0.00977654	0.892794	0.706319	-0.1636	0.151	0	0.906248	1.15486e+06	1.04659e+06	1318381	991346	821181	1.272e+06
Q9NRY5	FAM114A2	Protein FAM114A2	0.0656425	0.893104	0.75701	-0.1631	0.1209	0	0.856645	621959	532798	805698	438220	582876	482720
Q8WXD5	GEMIN6	Gem-associated protein 6	0.0363128	0.893352	0.555743	-0.1627	0.2551	0	0.902652	2.11417e+06	1.90836e+06	2.25997e+06	1.96836e+06	1.63446e+06	2.18226e+06
Q86W50	METTL16	RNA N6-adenosine-methyltransferase METTL16	0	0.894157	0.506266	-0.1614	0.2956	0	0.901358	1.26864e+06	1.1435e+06	1.30546e+06	1.23183e+06	990985	1.29602e+06
Q7L592	NDUFAF7	Protein arginine methyltransferase NDUFAF7, mitochondrial	0.0181564	0.894281	0.880535	-0.1612	0.05525	0	0.903041	1.29813e+06	1.17227e+06	1.84894e+06	747322	653799	1.69073e+06
Q8NBF6	AVL9	Late secretory pathway protein AVL9 homolog	0	0.894839	0.72081	-0.1603	0.1422	0	0.918425	1.08408e+06	995648	1.19197e+06	976192	750177	1.24112e+06
Q14593	ZNF273	Zinc finger protein 273	0.0488827	0.894963	0.182471	-0.1601	0.7388	0	0.896514	857945	769160	850553	865337	726923	811397
Q92540	SMG7	Nonsense-mediated mRNA decay factor SMG7	0.0544693	0.895708	0.807232	-0.1589	0.093	0	0.883718	655871	579605	848856	462886	724579	434631
P62312	LSM6	U6 snRNA-associated Sm-like protein LSm6	0.0824022	0.895708	0.494931	-0.1589	0.3055	0	0.899464	8.35121e+06	7.51161e+06	7.8216e+06	8.88083e+06	8.38613e+06	6.63709e+06
P54619	PRKAG1	5'-AMP-activated protein kinase subunit gamma-1	0.0600559	0.896391	0.705454	-0.1578	0.1515	0	0.912585	7.38034e+06	6.73518e+06	8232082	6.52859e+06	5.25662e+06	8.21375e+06
Q06210	GFPT1	Glutamine--fructose-6-phosphate aminotransferase [isomerizing] 1	0.0865922	0.896577	0.846901	-0.1575	0.07217	0	0.906935	1.58534e+07	1.4378e+07	2.09926e+07	1.07141e+07	9.3149e+06	1.94411e+07
Q9H061	TMEM126A	Transmembrane protein 126A	0.00418994	0.89664	0.586051	-0.1574	0.2321	0	0.886757	326255	289309	379963	272547	278490	300129
Q13049	TRIM32	E3 ubiquitin-protein ligase TRIM32	0.00139665	0.896826	0.740722	-0.1571	0.1303	0	0.926983	320460	297061	291964	348956	218336	375786
Q6NZ67	MZT2B	Mitotic-spindle organizing protein 2B	0.0209497	0.896888	0.549829	-0.157	0.2598	0	0.901307	758628	683756	818239	699017	594610	772902
Q99643	SDHC	Succinate dehydrogenase cytochrome b560 subunit, mitochondrial	0.0027933	0.897323	0.417671	-0.1563	0.3792	0	0.898551	471229	423423	503785	438672	389181	457665
Q969F1	GTF3C6	General transcription factor 3C polypeptide 6	0.0027933	0.897759	0.69365	-0.1556	0.1589	0	0.888844	416842	370508	337424	496261	320394	420621
P82932	MRPS6	28S ribosomal protein S6, mitochondrial	0.0530726	0.898008	0.713378	-0.1552	0.1467	0	0.923413	7.52834e+06	6.95177e+06	7.01748e+06	8.03921e+06	5.28052e+06	8.62303e+06
Q86WJ1	CHD1L	Chromodomain-helicase-DNA-binding protein 1-like	0.00558659	0.898132	0.701616	-0.155	0.1539	0	0.9217	5.02461e+06	4.63118e+06	4.71545e+06	5.33377e+06	3.55827e+06	5.7041e+06
Q16850	CYP51A1	Lanosterol 14-alpha demethylase	0.0223464	0.898319	0.881487	-0.1547	0.05478	0	0.928686	1.05146e+07	9.76473e+06	1.45727e+07	6.45644e+06	1.41699e+07	5.35953e+06
Q9HD45	TM9SF3	Transmembrane 9 superfamily member 3	0.0432961	0.898319	0.8803	-0.1547	0.05537	0	1.01438	1.38237e+06	1.40225e+06	1737851	1.02688e+06	678879	2.12562e+06
Q8WUY8	NAT14	Probable N-acetyltransferase 14	0	0.898444	0.792212	-0.1545	0.1012	0	0.91558	920095	842420	1.11843e+06	721764	609898	1.07494e+06
Q9NPA0	EMC7	ER membrane protein complex subunit 7	0.00139665	0.898755	0.842506	-0.154	0.07443	0	0.816662	1.23196e+06	1.0061e+06	1.75875e+06	705175	886669	1.12553e+06
O15155	BET1	BET1 homolog	0.00139665	0.899004	0.666638	-0.1536	0.1761	0	0.892971	989376	883484	1.15859e+06	820159	774744	992225
O15541	RNF113A	E3 ubiquitin-protein ligase RNF113A	0.0391061	0.899129	0.646899	-0.1534	0.1892	0	0.885176	373625	330724	305438	441813	306527	354921
Q9P232	CNTN3	Contactin-3	0	0.899565	0.792494	-0.1527	0.101	0	0.948168	1.08544e+06	1.02918e+06	1.1737e+06	997176	689228	1.36913e+06
Q9NX47	MARCHF5	E3 ubiquitin-protein ligase MARCHF5	0	0.9015	0.679813	-0.1496	0.1676	0	0.916401	1.70393e+06	1.56148e+06	1.82648e+06	1.58138e+06	1.24628e+06	1.87669e+06
Q5VIR6	VPS53	Vacuolar protein sorting-associated protein 53 homolog	0.0321229	0.901625	0.716204	-0.1494	0.145	0	0.928265	982471	911994	937970	1.02697e+06	694612	1.12938e+06
Q9P0I2	EMC3	ER membrane protein complex subunit 3	0.00698324	0.901688	0.884544	-0.1493	0.05328	0	1.01709	1.56034e+06	1.58701e+06	1.96461e+06	1.15607e+06	767181	2.40684e+06
O95070	YIF1A	Protein YIF1A	0.0027933	0.902438	0.667908	-0.1481	0.1753	0	0.915427	1.82467e+06	1.67035e+06	1.9758e+06	1.67353e+06	1.35823e+06	1.98246e+06
O00165	HAX1	HCLS1-associated protein X-1	0.0879888	0.903064	0.780849	-0.1471	0.1074	0	0.945584	3.60032e+06	3.40441e+06	3.35986e+06	3.84079e+06	2.37054e+06	4.43827e+06
Q86XL3	ANKLE2	Ankyrin repeat and LEM domain-containing protein 2	0.0600559	0.903189	0.889271	-0.1469	0.05097	0	0.949231	1.82937e+06	1.73649e+06	2.52358e+06	1.13515e+06	918786	2.55419e+06
Q5EBL8	PDZD11	PDZ domain-containing protein 11	0.0139665	0.903314	0.80759	-0.1467	0.09281	0	0.877557	643577	564775	449747	837407	673811	455740
Q13888	GTF2H2	General transcription factor IIH subunit 2	0.00837989	0.904191	0.520464	-0.1453	0.2836	0	0.910386	1.43323e+06	1.30479e+06	1.361e+06	1.50546e+06	1.14918e+06	1.46041e+06
P13489	RNH1	Ribonuclease inhibitor	0.0977654	0.904254	0.717353	-0.1452	0.1443	0	0.930105	1.02407e+07	9.52493e+06	10198720	1.02827e+07	7.27708e+06	1.17728e+07
Q6IA86	ELP2	Elongator complex protein 2	0.0139665	0.904505	0.940305	-0.1448	0.02673	0	0.950024	931575	885019	312013	1.55114e+06	261737	1.5083e+06
Q96JC1	VPS39	Vam6/Vps39-like protein	0.00139665	0.905195	0.540261	-0.1437	0.2674	0	0.913113	243349	222206	244405	242294	252479	191932
O75165	DNAJC13	DnaJ homolog subfamily C member 13	0.0656425	0.905634	0.79745	-0.143	0.0983	0	0.858879	8.58744e+06	7.37557e+06	1.13636e+07	5.81123e+06	7.12267e+06	7.62846e+06
P49589	CARS1	Cysteine--tRNA ligase, cytoplasmic	0.0335196	0.906953	0.525334	-0.1409	0.2796	0	0.916999	1.33949e+07	1.22831e+07	1.31694e+07	1.36204e+07	1.07221e+07	13844072
Q96D09	GPRASP2	G-protein coupled receptor-associated sorting protein 2	0.0153631	0.907456	0.797392	-0.1401	0.09833	0	0.954768	3.30522e+06	3.15572e+06	3.5002e+06	3.11024e+06	2.15953e+06	4.1519e+06
O15382	BCAT2	Branched-chain-amino-acid aminotransferase, mitochondrial	0.0027933	0.90796	0.886999	-0.1393	0.05208	0	0.929581	1.90496e+06	1.77081e+06	2.62293e+06	1.18698e+06	1.02044e+06	2.52119e+06
Q9NSE4	IARS2	Isoleucine--tRNA ligase, mitochondrial	0.0921788	0.908023	0.782774	-0.1392	0.1064	0	0.953237	1.82267e+07	1.73743e+07	1.85901e+07	1.78632e+07	1.2199e+07	2.25497e+07
L0R8F8	MIEF1	MIEF1 upstream open reading frame protein	0.00139665	0.908085	0.592325	-0.1391	0.2274	0	0.916486	1.23945e+06	1.13594e+06	1300237	1.17866e+06	973398	1.29848e+06
Q7Z460	CLASP1	CLIP-associating protein 1	0.0740223	0.908715	0.6021	-0.1381	0.2203	0	0.919495	6.0882e+06	5.59807e+06	6.29559e+06	5.8808e+06	4.75305e+06	6.44309e+06
Q9NRX2	MRPL17	39S ribosomal protein L17, mitochondrial	0.0544693	0.908841	0.831164	-0.1379	0.08031	0	0.979068	6.86544e+06	6.72174e+06	6.58332e+06	7.14757e+06	4.21249e+06	9.23098e+06
Q01968	OCRL	Inositol polyphosphate 5-phosphatase OCRL	0.0293296	0.909093	0.818786	-0.1375	0.08683	0	0.949029	1955553	1.85588e+06	2.24639e+06	1.66471e+06	1261906	2.44985e+06
Q9NZP2	OR6C2	Olfactory receptor 6C2	0	0.909345	0.846187	-0.1371	0.07253	0	0.985652	634167	625068	696943	571390	376928	873207
O60725	ICMT	Protein-S-isoprenylcysteine O-methyltransferase	0.00837989	0.910039	0.806793	-0.136	0.09324	0	0.959675	1.20137e+06	1.15293e+06	1.22805e+06	1.17469e+06	779165	1.52669e+06
P60059	SEC61G	Protein transport protein Sec61 subunit gamma	0.0265363	0.910354	0.136456	-0.1355	0.865	0	0.909685	4152327	3.77731e+06	4.30639e+06	3.99826e+06	3.81816e+06	3.73646e+06
O15258	RER1	Protein RER1	0.0111732	0.910544	0.473895	-0.1352	0.3243	0	0.906541	3.2418e+06	2.93883e+06	3.57832e+06	2.90529e+06	3018446	2.85921e+06
Q8N6R0	METTL13	eEF1A lysine and N-terminal methyltransferase	0.0027933	0.91067	0.790071	-0.135	0.1023	0	0.953827	3.72135e+06	3.54952e+06	3.52512e+06	3.91758e+06	2.50428e+06	4.59476e+06
Q6ZN17	LIN28B	Protein lin-28 homolog B	0.0810056	0.911364	0.561308	-0.1339	0.2508	0	0.916872	5.73501e+06	5.25827e+06	5.43632e+06	6.03369e+06	4.608e+06	5.90854e+06
P56545	CTBP2	C-terminal-binding protein 2	0.099162	0.911744	0.582741	-0.1333	0.2345	0	0.900163	1.49082e+07	1.34198e+07	1.27762e+07	1.70402e+07	1.35553e+07	1.32844e+07
O43318	MAP3K7	Mitogen-activated protein kinase kinase kinase 7	0.0321229	0.911807	0.787383	-0.1332	0.1038	0	0.952009	297513	283235	302346	292680	200730	365739
Q8IUF1	ZNG1B	Zinc-regulated GTPase metalloprotein activator 1B	0.00558659	0.911996	0.687169	-0.1329	0.1629	0	0.929202	3.12471e+06	2.90349e+06	3.18237e+06	3.06705e+06	2.33887e+06	3.46811e+06
Q99447	PCYT2	Ethanolamine-phosphate cytidylyltransferase	0.00418994	0.912249	0.906273	-0.1325	0.04274	0	1.13255	1.56561e+06	1.77313e+06	1.66798e+06	1.46325e+06	717436	2.82882e+06
P49593	PPM1F	Protein phosphatase 1F	0.0111732	0.912249	0.875165	-0.1325	0.05791	0	1.02047	4.40811e+06	4.49835e+06	4.96915e+06	3.84708e+06	2.42024e+06	6.57646e+06
O15084	ANKRD28	Serine/threonine-protein phosphatase 6 regulatory ankyrin repeat subunit A	0.0740223	0.912376	0.799843	-0.1323	0.097	0	0.952283	812518	773747	761685	863350	541607	1.00589e+06
Q99611	SEPHS2	Selenide, water dikinase 2	0.00139665	0.912629	0.773722	-0.1319	0.1114	0	0.932616	4.01379e+06	3.74332e+06	4.53065e+06	3.49692e+06	2.83571e+06	4.65093e+06
Q9H019	MTFR1L	Mitochondrial fission regulator 1-like	0	0.912945	0.660261	-0.1314	0.1803	0	0.92479	403801	373431	380968	426635	310752	436111
O75348	ATP6V1G1	V-type proton ATPase subunit G 1	0.0670391	0.913705	0.744304	-0.1302	0.1282	0	0.940356	2.00122e+06	1.88185e+06	2.03666e+06	1965772	1.43794e+06	2.32577e+06
O14907	TAX1BP3	Tax1-binding protein 3	0.00698324	0.91675	0.414249	-0.1254	0.3827	0	0.915163	434098	397270	401458	466737	412222	382319
P50416	CPT1A	Carnitine O-palmitoyltransferase 1, liver isoform	0.0125698	0.918276	0.904908	-0.123	0.0434	0	1.05124	596678	627253	735771	457585	297368	957138
P78345	RPP38	Ribonuclease P protein subunit p38	0.0405028	0.918276	0.847585	-0.123	0.07182	0	0.984563	5.04663e+06	4.96873e+06	5.41506e+06	4.67821e+06	3.15208e+06	6.78538e+06
Q9Y692	GMEB1	Glucocorticoid modulatory element-binding protein 1	0.0027933	0.919678	0.989764	-0.1208	0.004468	0	0.846777	388997	329393	100	388997	100	329393
P45877	PPIC	Peptidyl-prolyl cis-trans isomerase C	0.00837989	0.919741	0.685614	-0.1207	0.1639	0	0.909127	343327	312128	286012	400641	330065	294191
P48507	GCLM	Glutamate--cysteine ligase regulatory subunit	0.0405028	0.919869	0.534634	-0.1205	0.2719	0	0.925534	4.55349e+06	4.21441e+06	4.63817e+06	4.46881e+06	3.74562e+06	4.6832e+06
Q5C9Z4	NOM1	Nucleolar MIF4G domain-containing protein 1	0.0544693	0.919933	0.682177	-0.1204	0.1661	0	0.928444	6.80801e+06	6.32086e+06	6.28841e+06	7.32762e+06	5.32628e+06	7.31544e+06
Q9BXS5	AP1M1	AP-1 complex subunit mu-1	0.0293296	0.920251	0.890919	-0.1199	0.05016	0	1.04842	2.26212e+07	2.37165e+07	2.40975e+07	2.11449e+07	1.21573e+07	3.52757e+07
O60830	TIMM17B	Mitochondrial import inner membrane translocase subunit Tim17-B	0	0.922359	0.805175	-0.1166	0.09411	0	0.959199	3.72437e+06	3.57241e+06	3.85297e+06	3.59577e+06	2.57527e+06	4.56954e+06
P33552	CKS2	Cyclin-dependent kinases regulatory subunit 2	0.00139665	0.922679	0.898086	-0.1161	0.04668	0	0.814723	593975	483925	883679	304271	410327	557523
Q9NVE7	PANK4	4'-phosphopantetheine phosphatase	0.0251397	0.922806	0.868231	-0.1159	0.06136	0	0.96873	4.64177e+06	4.49662e+06	5.57258e+06	3.71096e+06	2.88241e+06	6.11083e+06
Q9NR56	MBNL1	Muscleblind-like protein 1	0.0111732	0.922998	0.230215	-0.1156	0.6379	0	0.920948	3.35795e+06	3.0925e+06	3.22369e+06	3.49222e+06	3.16965e+06	3.01535e+06
Q10469	MGAT2	Alpha-1,6-mannosyl-glycoprotein 2-beta-N-acetylglucosaminyltransferase	0	0.923126	0.546055	-0.1154	0.2628	0	0.918281	336090	308625	372009	300171	300102	317149
Q9NTG7	SIRT3	NAD-dependent protein deacetylase sirtuin-3, mitochondrial	0	0.924791	0.702077	-0.1128	0.1536	0	0.934005	460467	430078	496107	424826	362461	497696
Q8WUD4	CCDC12	Coiled-coil domain-containing protein 12	0.0335196	0.925112	0.99135	-0.1123	0.003773	0	0.856131	873766	748058	100	873766	748058	100
Q96S59	RANBP9	Ran-binding protein 9	0.0530726	0.926845	0.750102	-0.1096	0.1249	0	0.936813	615601	576703	551142	680060	473957	679450
Q96EH3	MALSU1	Mitochondrial assembly of ribosomal large subunit protein 1	0.00139665	0.927423	0.744499	-0.1087	0.1281	0	0.946196	583904	552488	594279	573529	442994	661981
Q8NC96	NECAP1	Adaptin ear-binding coat-associated protein 1	0.00139665	0.927873	0.910098	-0.108	0.04091	0	0.971828	869698	845198	573104	1.16629e+06	1.21314e+06	477250
P36915	GNL1	Guanine nucleotide-binding protein-like 1	0.00558659	0.927873	0.918196	-0.108	0.03706	0	0.893256	5.0061e+06	4.47172e+06	7.31666e+06	2.69553e+06	2.73738e+06	6.20607e+06
P07203	GPX1	Glutathione peroxidase 1	0.0949721	0.928002	0.83975	-0.1078	0.07585	0	0.887877	1.83445e+06	1.62876e+06	2.39249e+06	1.27641e+06	1.48056e+06	1.77697e+06
P78346	RPP30	Ribonuclease P protein subunit p30	0.0684358	0.928259	0.794558	-0.1074	0.09987	0	0.939577	8.12777e+06	7.63667e+06	9.24488e+06	7.01066e+06	6.06252e+06	9210814
Q8IY37	DHX37	Probable ATP-dependent RNA helicase DHX37	0.0907821	0.928324	0.860452	-0.1073	0.06527	0	0.94057	4.56066e+06	4.28962e+06	5.62674e+06	3.49459e+06	3.09468e+06	5.48456e+06
O00273	DFFA	DNA fragmentation factor subunit alpha	0.0614525	0.928452	0.516347	-0.1071	0.2871	0	0.931738	1.70552e+07	15890942	1.68668e+07	1.72436e+07	1.43609e+07	1.7421e+07
Q9H0R4	HDHD2	Haloacid dehalogenase-like hydrolase domain-containing protein 2	0.00418994	0.928646	0.809482	-0.1068	0.09179	0	0.957833	501768	480609	467172	536364	358474	602744
P46976	GYG1	Glycogenin-1	0.0349162	0.92871	0.29872	-0.1067	0.5247	0	0.92821	2.43056e+06	2.25607e+06	2.43421e+06	2.42692e+06	2.13602e+06	2.37612e+06
Q9Y3S1	WNK2	Serine/threonine-protein kinase WNK2	0.0363128	0.929225	0.79723	-0.1059	0.09842	0	0.95725	1.3163e+06	1.26003e+06	1.3105e+06	1.3221e+06	950939	1.56912e+06
Q8N6L1	KRTCAP2	Keratinocyte-associated protein 2	0.00139665	0.929612	0.911347	-0.1053	0.04032	0	0.840621	2616111	2.19916e+06	3.87183e+06	1.36039e+06	1.65654e+06	2.74178e+06
Q6UW68	TMEM205	Transmembrane protein 205	0.00139665	0.929676	0.638241	-0.1052	0.195	0	0.938219	999142	937414	979952	1.01833e+06	1.05964e+06	815188
O43805	SSNA1	Microtubule nucleation factor SSNA1	0.0027933	0.92974	0.448577	-0.1051	0.3482	0	0.92731	1.097e+06	1.01726e+06	1.01412e+06	1.17988e+06	1.01415e+06	1.02037e+06
Q9HCE3	ZNF532	Zinc finger protein 532	0.0153631	0.92974	0.628032	-0.1051	0.202	0	0.934554	2.74564e+06	2.56595e+06	2.59126e+06	2.90002e+06	2.86268e+06	2.26921e+06
Q9HCK4	ROBO2	Roundabout homolog 2	0.00698324	0.930256	0.582496	-0.1043	0.2347	0	0.931341	16204553	1.5092e+07	17641654	14767452	14043161	16140756
Q8IW35	CEP97	Centrosomal protein of 97 kDa	0.0321229	0.930321	0.75298	-0.1042	0.1232	0	0.948057	3.08049e+06	2.92048e+06	2.98292e+06	3.17805e+06	2.34992e+06	3.49103e+06
Q9BYN0	SRXN1	Sulfiredoxin-1	0	0.930901	0.991493	-0.1033	0.00371	0	0.866036	486806	421591	486806	100	421591	100
P27361	MAPK3	Mitogen-activated protein kinase 3	0.027933	0.930901	0.486572	-0.1033	0.3129	0	0.928126	7.52366e+06	6.9829e+06	8.1622e+06	6885113	6.96292e+06	7.00288e+06
Q9UKZ1	CNOT11	CCR4-NOT transcription complex subunit 11	0.047486	0.93103	0.816348	-0.1031	0.08812	0	0.95805	1.60615e+06	1.53877e+06	1.73439e+06	1.4779e+06	1.1467e+06	1.93083e+06
Q8N4J0	CARNMT1	Carnosine N-methyltransferase	0	0.931418	0.301464	-0.1025	0.5208	0	0.932133	464474	432952	475406	453543	453022	412882
Q9UK59	DBR1	Lariat debranching enzyme	0.0251397	0.934269	0.418425	-0.09809	0.3784	0	0.932743	5.87498e+06	5.47985e+06	6.23778e+06	5.51218e+06	5.34316e+06	5.61654e+06
Q9P2X0	DPM3	Dolichol-phosphate mannosyltransferase subunit 3	0.0153631	0.935046	0.992724	-0.09689	0.003172	0	0.871968	1.0925e+06	952624	1.0925e+06	100	100	952624
Q96JN8	NEURL4	Neuralized-like protein 4	0.00139665	0.935215	0.474162	-0.09663	0.3241	0	0.93758	579262	543105	586252	572272	501843	584367
P40424	PBX1	Pre-B-cell leukemia transcription factor 1	0.00698324	0.935662	0.71476	-0.09594	0.1458	0	0.924538	337439	311976	284699	390179	318178	305773
P16083	NQO2	Ribosyldihydronicotinamide dehydrogenase [quinone]	0.0460894	0.936701	0.840795	-0.09434	0.07531	0	0.90873	1.76748e+07	1.60616e+07	22372552	1.2977e+07	1.74875e+07	1.46356e+07
Q9NR50	EIF2B3	Translation initiation factor eIF-2B subunit gamma	0.0530726	0.936746	0.774244	-0.09427	0.1111	0	0.954923	3.46262e+06	3.30653e+06	3.42013e+06	3.50511e+06	2.65634e+06	3.95673e+06
Q9NTW7	ZFP64	Zinc finger protein 64	0	0.937383	0.797443	-0.09329	0.0983	0	0.951069	298041	283458	268725	327358	227916	339000
Q9BWU1	CDK19	Cyclin-dependent kinase 19	0.00698324	0.93761	0.881705	-0.09294	0.05468	0	0.973915	450152	438410	533086	367218	297382	579438
Q9Y6A9	SPCS1	Signal peptidase complex subunit 1	0	0.939308	0.797284	-0.09033	0.09839	0	0.951398	508790	484062	558484	459096	393211	574912
O15228	GNPAT	Dihydroxyacetone phosphate acyltransferase	0.0195531	0.93949	0.923835	-0.09005	0.03441	0	1.08178	619329	669977	704795	533863	329467	1.01049e+06
Q99735	MGST2	Microsomal glutathione S-transferase 2	0.0027933	0.939718	0.778025	-0.0897	0.109	0	0.936673	679278	636262	777215	581342	717000	555523
Q02487	DSC2	Desmocollin-2	0.0265363	0.939901	0.883187	-0.08942	0.05395	0	0.888562	1.29328e+06	1.14916e+06	851171	1.73539e+06	1.03292e+06	1.26541e+06
A0A075B6R9	IGKV2D-24	Probable non-functional immunoglobulin kappa variable 2D-24	0.0349162	0.940148	0.714962	-0.08904	0.1457	0	0.939764	1.79567e+09	1687505013	2.01572e+09	1.57562e+09	1.82351e+09	1.5515e+09
Q05932	FPGS	Folylpolyglutamate synthase, mitochondrial	0	0.940683	0.669714	-0.08822	0.1741	0	0.947945	252250	239119	261919	242581	210922	267317
Q8N4Q0	PTGR3	Prostaglandin reductase 3	0.0167598	0.941407	0.803353	-0.08711	0.09509	0	0.960318	245272	235539	235452	255092	186861	284217
O43739	CYTH3	Cytohesin-3	0	0.942066	0.838158	-0.0861	0.07667	0	0.926881	296614	274926	232243	360985	239312	310541
Q96DT7	ZBTB10	Zinc finger and BTB domain-containing protein 10	0.0335196	0.942791	0.539152	-0.08499	0.2683	0	0.940917	5.57106e+06	5.2419e+06	5.20179e+06	5.94032e+06	5.47761e+06	5.00619e+06
Q15738	NSDHL	Sterol-4-alpha-carboxylate 3-dehydrogenase, decarboxylating	0.0949721	0.943294	0.85922	-0.08422	0.0659	0	0.970399	1.17534e+07	1.14055e+07	1.31999e+07	1.0307e+07	8.46154e+06	1.43495e+07
Q9H845	ACAD9	Complex I assembly factor ACAD9, mitochondrial	0.0446927	0.944321	0.73447	-0.08265	0.134	0	0.946601	1.56932e+07	1.48552e+07	1.42216e+07	1.71648e+07	1.6546e+07	1.31645e+07
Q7Z422	SZRD1	SUZ domain-containing protein 1	0.00139665	0.944433	0.89191	-0.08248	0.04968	0	0.895597	913940	818522	605933	1221947	920794	716249
P09525	ANXA4	Annexin A4	0.0251397	0.945055	0.768958	-0.08153	0.1141	0	0.948848	1.43809e+06	1.36453e+06	1.31252e+06	1.56366e+06	1.55605e+06	1.17301e+06
Q9NVS2	MRPS18A	39S ribosomal protein S18a, mitochondrial	0.0572626	0.945533	0.876281	-0.0808	0.05736	0	0.990865	6.03244e+06	5.97733e+06	5.66819e+06	6.39669e+06	4.17495e+06	7.77971e+06
Q9Y314	NOSIP	Nitric oxide synthase-interacting protein	0.0963687	0.946602	0.838688	-0.07917	0.0764	0	0.970479	5.12448e+06	4.9732e+06	5.4353e+06	4.81367e+06	3.85483e+06	6.09158e+06
Q9UJX6	ANAPC2	Anaphase-promoting complex subunit 2	0.0027933	0.94695	0.634508	-0.07864	0.1976	0	0.948545	406591	385670	429764	383417	355391	415948
Q8NI60	COQ8A	Atypical kinase COQ8A, mitochondrial	0.0502793	0.947265	0.863303	-0.07816	0.06384	0	0.980224	2.19489e+06	2.15148e+06	2.29659e+06	2.09318e+06	1.5772e+06	2.72576e+06
Q9NZE8	MRPL35	39S ribosomal protein L35, mitochondrial	0.00139665	0.947291	0.895586	-0.07812	0.04789	0	1.00071	1.52035e+06	1.52142e+06	1.36155e+06	1.67914e+06	1.01106e+06	2.03179e+06
Q96GM8	TOE1	Target of EGR1 protein 1	0.0432961	0.94806	0.821334	-0.07695	0.08548	0	0.967682	3.69125e+06	3.57195e+06	3.87672e+06	3.50578e+06	2.85948e+06	4.28443e+06
Q86W56	PARG	Poly(ADP-ribose) glycohydrolase	0.0656425	0.948362	0.775389	-0.07649	0.1105	0	0.946068	339872	321541	383076	296667	353903	289180
Q96SZ6	CDK5RAP1	Mitochondrial tRNA methylthiotransferase CDK5RAP1	0.00418994	0.948914	0.852648	-0.07565	0.06923	0	0.965077	342007	330063	384505	299508	260461	399665
P86790	CCZ1B	Vacuolar fusion protein CCZ1 homolog B	0.00558659	0.949178	0.881687	-0.07525	0.05469	0	0.928782	2.23967e+06	2.08016e+06	1.66149e+06	2.81784e+06	2.41125e+06	1.74907e+06
Q8IUR0	TRAPPC5	Trafficking protein particle complex subunit 5	0.0223464	0.950145	0.817575	-0.07378	0.08747	0	0.965614	2.15797e+06	2.08377e+06	2.27522e+06	2.04072e+06	1.70142e+06	2.46612e+06
P46734	MAP2K3	Dual specificity mitogen-activated protein kinase kinase 3	0.0307263	0.950989	0.943271	-0.0725	0.02536	0	1.10108	3.12627e+06	3.44226e+06	3.72938e+06	2.52315e+06	1.6094e+06	5.27512e+06
O95470	SGPL1	Sphingosine-1-phosphate lyase 1	0.0209497	0.951615	0.748021	-0.07155	0.1261	0	0.95986	7.16835e+06	6.88061e+06	7.12268e+06	7.21402e+06	5.95823e+06	7.803e+06
Q9H9T3	ELP3	Elongator complex protein 3	0.0321229	0.951615	0.924971	-0.07155	0.03387	0	1.01587	8.73784e+06	8.87652e+06	1.04882e+07	6.98744e+06	5.36412e+06	1.23889e+07
Q8IXI2	RHOT1	Mitochondrial Rho GTPase 1	0.00698324	0.952156	0.876357	-0.07073	0.05732	0	0.96512	2.3e+06	2.21977e+06	2.65533e+06	1.94466e+06	1.72061e+06	2.71893e+06
P35227	PCGF2	Polycomb group RING finger protein 2	0.00418994	0.95242	0.826261	-0.07033	0.08288	0	0.96753	471218	455917	495265	447170	370995	540838
Q6P3X3	TTC27	Tetratricopeptide repeat protein 27	0.0027933	0.953404	0.867608	-0.06884	0.06168	0	0.972854	3.44608e+06	3.35254e+06	3.82458e+06	3.06759e+06	2.60485e+06	4.10023e+06
Q9ULX3	NOB1	RNA-binding protein NOB1	0.0446927	0.953728	0.760766	-0.06835	0.1187	0	0.962557	1.46482e+07	1.40997e+07	1.44706e+07	1.48258e+07	1.21797e+07	1.60198e+07
O43933	PEX1	Peroxisomal ATPase PEX1	0.00558659	0.953735	0.870746	-0.06834	0.06011	0	0.958127	3.63456e+06	3.48237e+06	4.24702e+06	3.02211e+06	4.14178e+06	2.82296e+06
Q9NP61	ARFGAP3	ADP-ribosylation factor GTPase-activating protein 3	0.0153631	0.953741	0.799643	-0.06833	0.0971	0	0.958509	5.5188e+06	5.28982e+06	6.02766e+06	5.00993e+06	4.57948e+06	6.00015e+06
O60524	NEMF	Ribosome quality control complex subunit NEMF	0.0153631	0.953761	0.9119	-0.0683	0.04005	0	0.996045	6.82451e+06	6.79752e+06	7.95123e+06	5.69779e+06	4.57437e+06	9.02067e+06
Q14674	ESPL1	Separin	0.0027933	0.953874	0.694661	-0.06813	0.1582	0	0.951984	2698141	2.56859e+06	2.46243e+06	2.93385e+06	2.71362e+06	2.42355e+06
Q9BV79	MECR	Enoyl-[acyl-carrier-protein] reductase, mitochondrial	0	0.954363	0.700247	-0.06739	0.1547	0	0.949143	677790	643320	606662	748918	644811	641828
Q69YN2	CWF19L1	CWF19-like protein 1	0.0391061	0.955766	0.844804	-0.06527	0.07324	0	0.967036	4.47456e+06	4.32706e+06	4.90612e+06	4.04301e+06	3.56077e+06	5.09336e+06
Q15139	PRKD1	Serine/threonine-protein kinase D1	0.00558659	0.956469	0.637422	-0.06421	0.1956	0	0.960197	811117	778832	797732	824501	717227	840436
O75608	LYPLA1	Acyl-protein thioesterase 1	0.0377095	0.957643	0.877961	-0.06244	0.05652	0	0.98704	5.81024e+06	5.73494e+06	5.60527e+06	6.01522e+06	4.34832e+06	7121573
Q9UNK0	STX8	Syntaxin-8	0	0.957776	0.938472	-0.06224	0.02758	0	0.955435	1.01324e+06	968081	669245	1.35723e+06	647407	1.28876e+06
P22694	PRKACB	cAMP-dependent protein kinase catalytic subunit beta	0.0349162	0.957862	0.890818	-0.06211	0.05021	0	0.994153	661118	657253	652468	669768	479503	835002
Q00796	SORD	Sorbitol dehydrogenase	0.0642458	0.957902	0.846206	-0.06205	0.07252	0	0.940013	1.10556e+07	1.03924e+07	1.31844e+07	8.92676e+06	1.042e+07	1.03649e+07
Q6IBS0	TWF2	Twinfilin-2	0.0488827	0.958201	0.750566	-0.0616	0.1246	0	0.952581	4.03806e+06	3.84658e+06	3.56555e+06	4.51057e+06	3.8835e+06	3.80966e+06
Q9H0A8	COMMD4	COMM domain-containing protein 4	0.0153631	0.958493	0.841992	-0.06116	0.07469	0	0.974732	1.13636e+06	1.10765e+06	1.1107e+06	1.16203e+06	902658	1.31264e+06
Q16563	SYPL1	Synaptophysin-like protein 1	0.027933	0.959224	0.959443	-0.06006	0.01798	0	0.795336	942031	749231	1.50079e+06	383274	569212	929250
P17480	UBTF	Nucleolar transcription factor 1	0.0949721	0.959603	0.77072	-0.05949	0.1131	0	0.967253	1.16413e+07	1.12601e+07	1.1251e+07	1.20315e+07	9.9052e+06	1.26149e+07
Q9NSP4	CENPM	Centromere protein M	0.00418994	0.960076	0.853731	-0.05878	0.06868	0	0.965336	1.29838e+06	1.25338e+06	1.44721e+06	1.14956e+06	1.05912e+06	1.44764e+06
O75027	ABCB7	Iron-sulfur clusters transporter ABCB7, mitochondrial	0.047486	0.960382	0.924404	-0.05832	0.03414	0	0.971724	3.62914e+06	3.52652e+06	4.49961e+06	2.75867e+06	2.54396e+06	4509085
[truncated: 721 more rows]
