# Supplementary material for: p53-induced RNA-binding protein ZMAT3 inhibits transcription of a hexokinase to suppress mitochondrial respiration in human cancer cells
Source: eLife. 2026 Mar 17;14:RP107538. doi: 10.7554/eLife.107538 (PMC12995290; doi:10.7554/eLife.107538)
Supplement: Supplementary file 6. [file elife-107538-supp6.xlsx]

## Sheet: Sheet1
Supplementary File 6. Sequences of oligos used for RT-qPCR, CRISPR-Cas9 knockout, ChIP-qPCR and HKDC1 intron 1 peak sequence used for reporter assays.
Name	Sequence
GAPDH RT-qPCR-F	TGC ACC ACC AAC TGC TTA GC
GAPDH RT-qPCR-R	GGC ATG GAC TGT GGT CAT GAG
ZMAT3 RT-qPCR-F	AGC CTG CAG CTA CTC CAG TT
ZMAT3 RT-qPCR-R	AAG GAG GCA TCA CAG AGC TT
p53 RT-qPCR-F	GAG CGT GCT TTC CAC GAC
p53 RT-qPCR-R	GCT CGA CGC TAG GAT CTG AC
HKDC1- RT-qPCR-F	GGTCAGGATGCTGCCCACCT
HKDC1- RT-qPCR-R	CCCAAGATCCAGGGCGAGAA
JUN RT-qPCR F	CCTTGAAAGCTCAGAACTCGGAG
JUN RT-qPCR R	TGCTGCGTTAGCATGAGTTGGC
LAMA2 RT-qPCR F	GGGCATTTGTGTGATGGACA
LAMA2 RT-qPCR-R	CTGCTTGAGGTCATCTGGGA
VSNL1 RT-qPCR F	CGAGTGGAGATGCTGGAGAT
VSNL1 RT-qPCR-R	ACAATGGAAGGGTCGCTCTT
SAMD3 RT-qPCR F	GCCACATGTTTACTCCTCCC
SAMD3 RT-qPCR-R	CCTTTGTGAGCCTCTCCCTT
IL6R RT-qPCR F	CTCCTCTGCATTGCCATTGT
IL6R RT-qPCR-R	GTATTGTCAGACCCCAGGCT
HKDC1 ChiP-qPCR F	AGAACACTCCTCCCAACACG
HKDC1 ChiP-qPCR R	GAGAAACGAGCTGTGCCTTT
LAMA2 ChiP-qPCR F	GAACAAGGCTTTTCCTCATCA
LAMA2 ChiP-qPCR R	TGCACAGTGTTCTTCCCAAA
VSNL1 ChiP-qPCR F	CTGGGCTGATTCATCTCCTC
VSNL1 ChiP-qPCR R	CTGCAGAAGGCTCACCACTT
SAMD3 ChiP-qPCR F	CAGTGGTTGAGGGTTGGAGT
SAMD3 ChiP-qPCR R	GCTCACAAGCAAGCCTATGG
IL6R ChiP-qPCR F	CCTGTTTATGGGTCCAAAGG
IL6R ChiP-qPCR R	TTACCTTGGCCTTGCCTTC
GLS RT-qPCR F	ATGATGTGCTGGTCTCCTCC
GLS RT-qPCR R	CACCACCTTCTCTTCGAGGA
SREBF1 RT-qPCR F	CCAGCCTGACCATCTGTGA
SREBF1 RT-qPCR R	CCACAAGAAGCAGGTCACAC
SLC2A1 RT-qPCR F	GTGGCCTTCTTTGAAGTGGG
SLC2A1 RT-qPCR R	AAGACGTAGGGACCACACAG
gRNA sequence for CRISPR-Cas9 knockout	Sequence
ZMAT3 gRNA#1 5'F	CCATCTGCCCTCCACGTGACA
ZMAT3 gRNA#1 3'F	CATTATGAATTATTATTATT
HKDC1 intron 1 peak binding sequence	CTGATGGTACCAATTTAAAAACATTATAAAGCAATCACTTGTTGATTAGATTCAGAGCCCTCTACTGGCTACTTAAGGAGGCGCTGCCTAGGAATCCACTTTCTTTTGTTATCTGCTTAGTAAAGGCACAAGTTGCACCATGTCTCTCCCACCCCCAAGGGGGAGCCTTTGGAACCCTGAAACCTTTGATTCTGCAAACTTATTTCATTTCCTTGGGCTCCTTTGTGTTGGTTAACCTTTTGTACCCTAGGATCATGCGGGACATGTTTGTCCAACAGCCCTGGTGCAGGCTCAGGAGCACCCTGTGATGGGAAATGCAGCCTCTGCTGATGGGCTCCAGGTCCTTCTGGAAGGACAGTCAGCCTTTTTCAATGCCGGGAGCTGACCTCCCTCTCCCTG…
